# Supplementary material
Source: PubMed Central journal article supplement (PMC4702960)
Supplement: pnas.1510461112.sd02.pdf [file pnas.1510461112.sd02.pdf]

## **Dataset S2 – table of contents**

| <b><u>Page</u></b> | <b><u>Description</u></b>                         |
|--------------------|---------------------------------------------------|
| 2.....             | File legend                                       |
| 3-312.....         | Gene trees                                        |
| 313-388.....       | Supporting information for gene trees             |
| 389-391.....       | Supporting information for genomic PCR (Figure 2) |

**Dataset S2. Gene trees and genomic PCR associated information.** Gene trees for a given gene presented with Bayesian (top) and bootstrap (500) support (lower). Gene tree information includes the gene identifier for a given tardigrade gene, NCBI accession number and taxon label in each tree for genes used in our alignments. Pertinent information for each genomic PCR.

# Gene trees

Key:

Met = metazoan

Pla = plant

Fun = fungi

Pro = protist

Arc = archaea

Eub = eubacteria

H\_duj = *Hypsibius dujardini* (tardigrade)

snap\_masked\_scaffold16703\_size5213\_processed\_gene\_0.5  
 chromosomal replication initiator protein DnaA

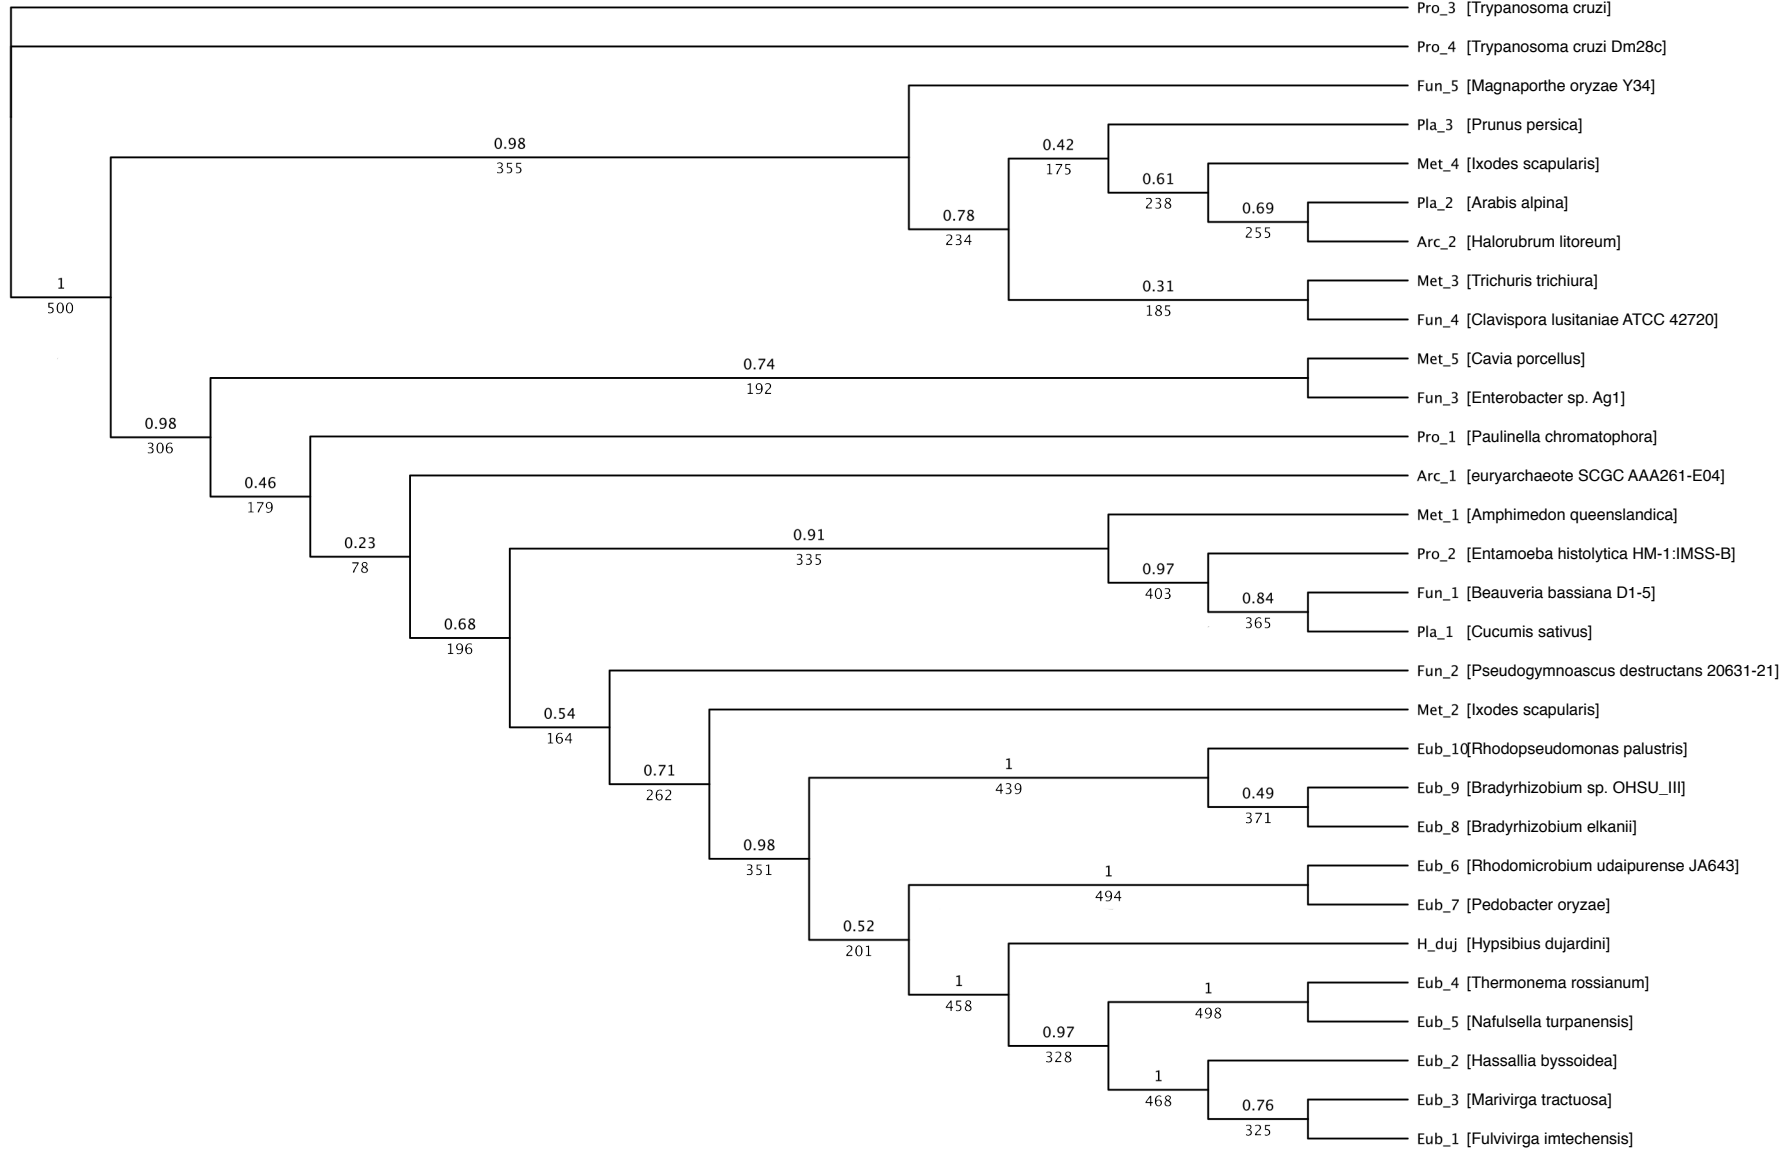

snap\_masked\_scaffold21250\_size3389\_processed\_gene\_0.4  
Fis family transcriptional regulator

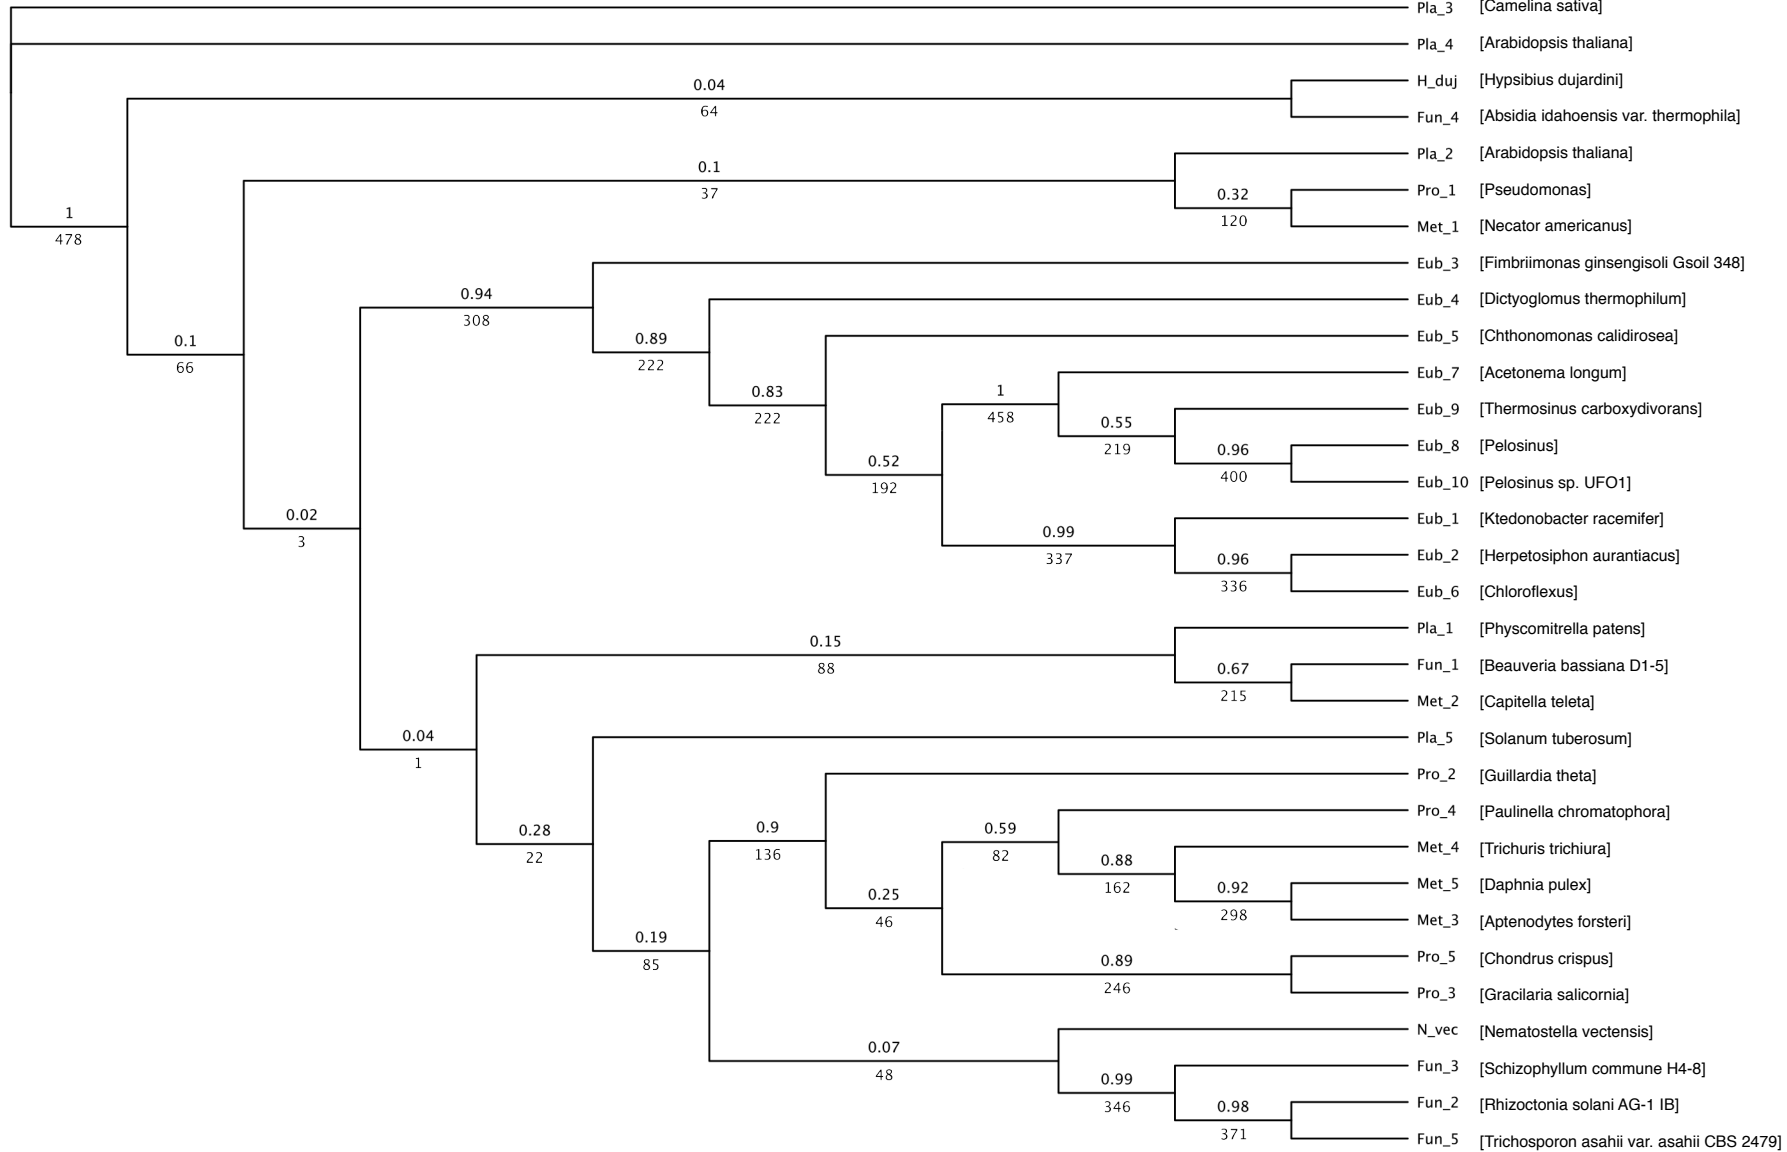

snap\_masked\_scaffold15974\_size5576\_processed\_gene\_0.4  
 Integrase

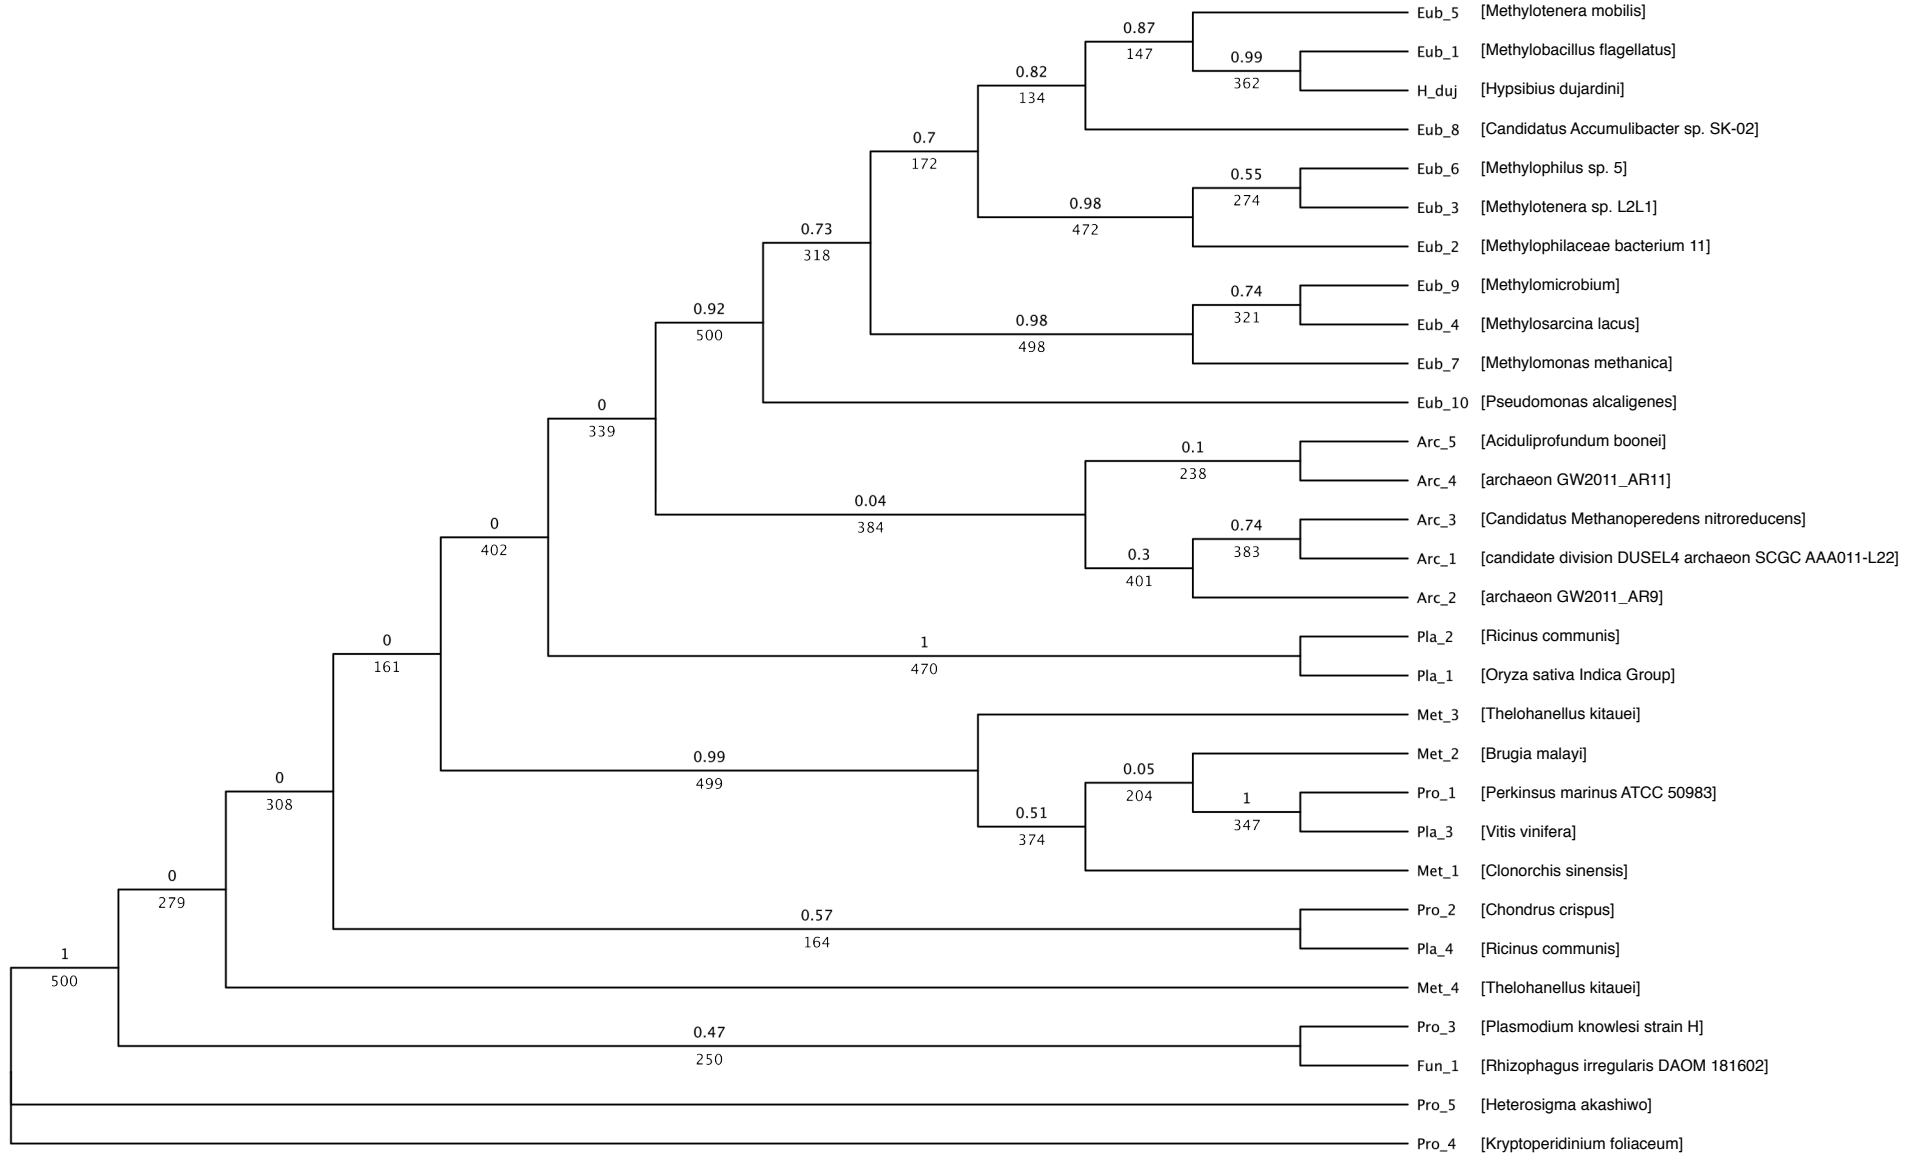

snap\_masked\_scaffold15732\_size5688\_processed\_gene\_0.5  
 glutamate--cysteine ligase

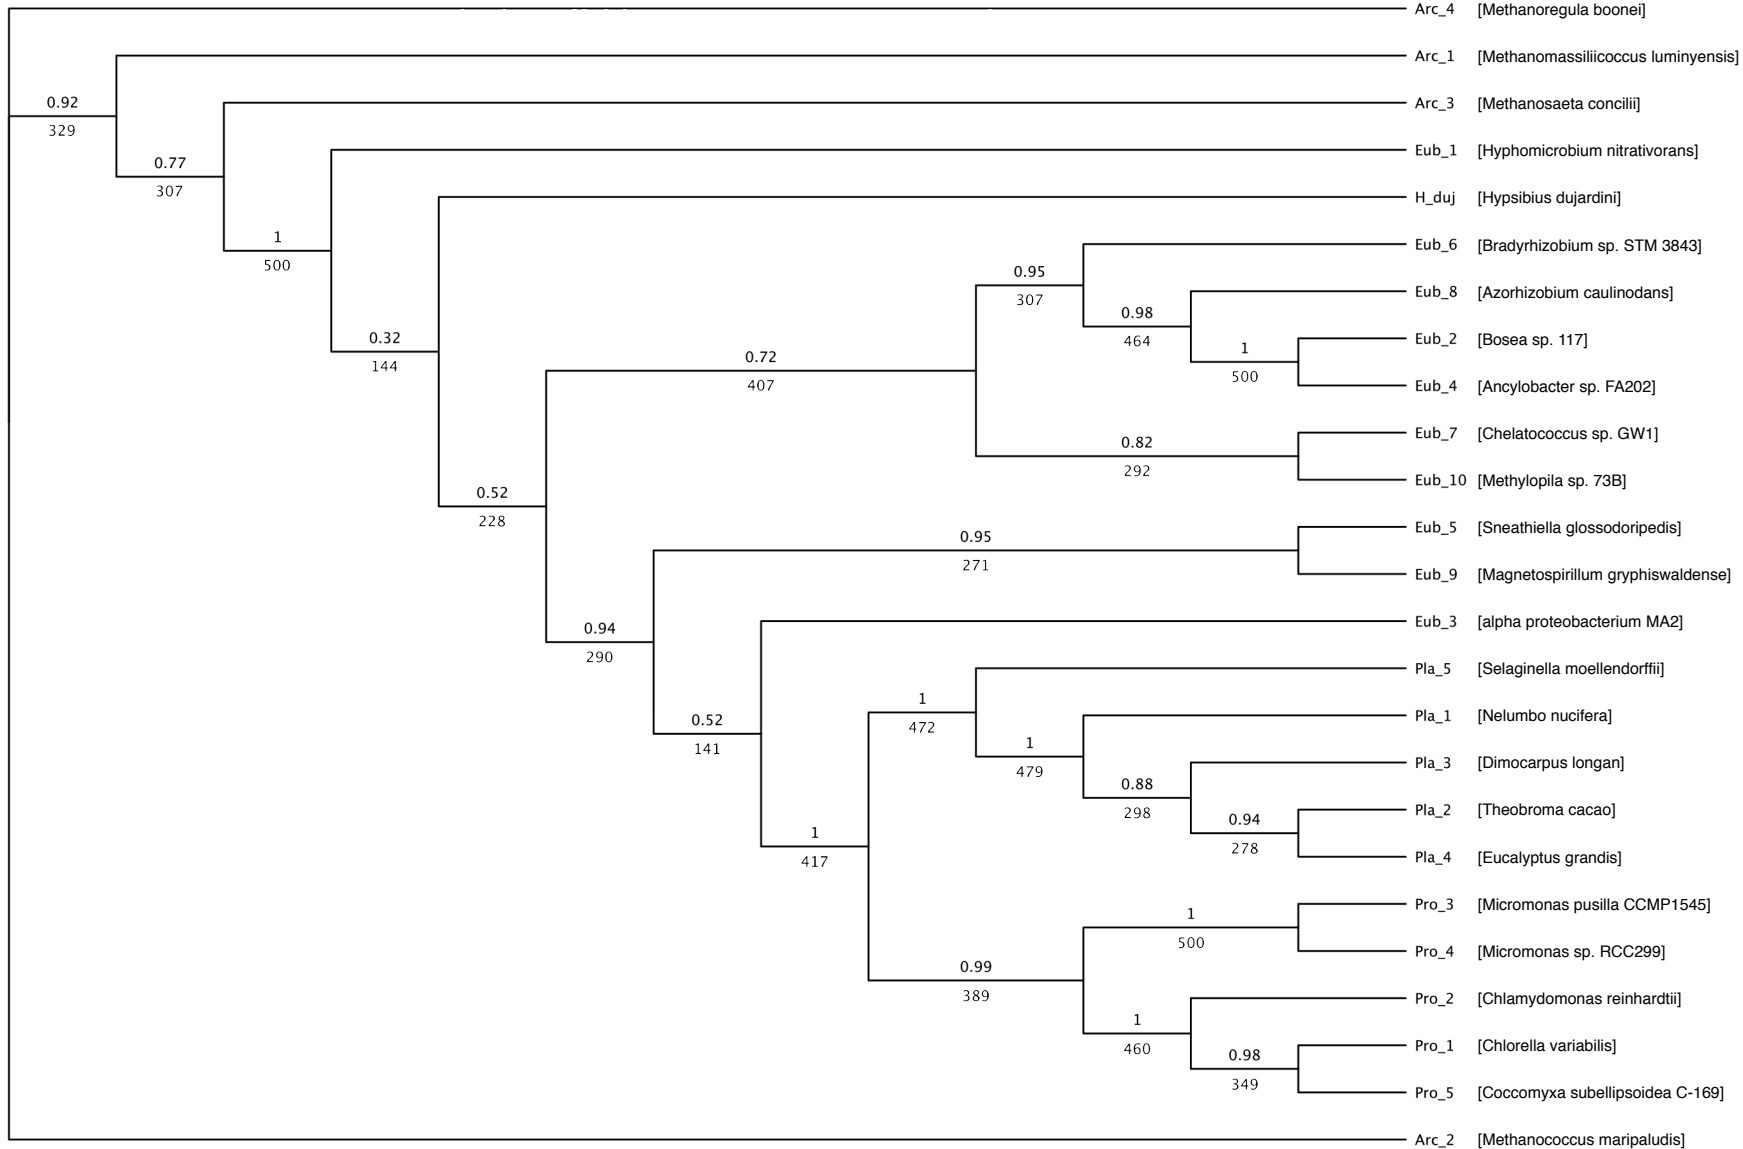

snap\_masked\_scaffold11172\_size8401\_processed\_gene\_0.10

Acetyl-CoA acetyltransferase

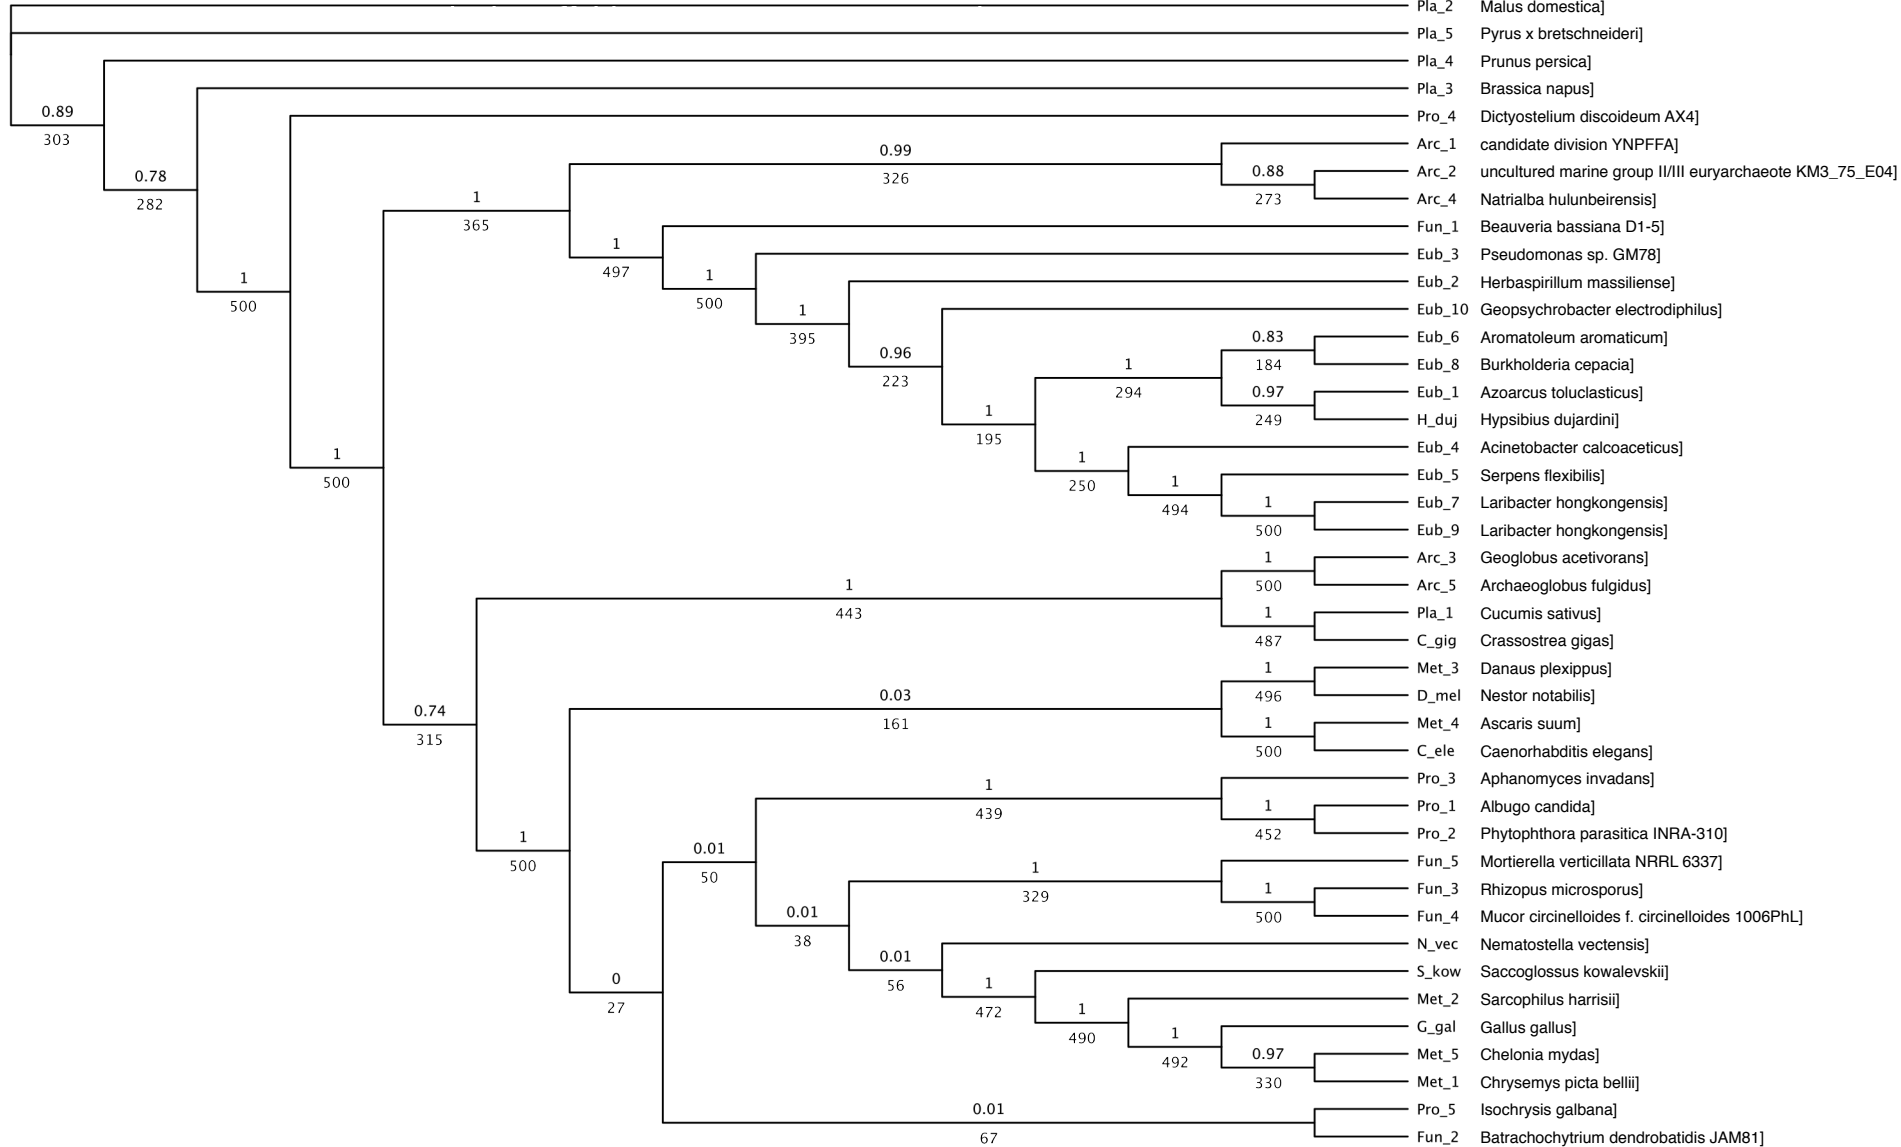



snap\_masked\_scaffold10640\_size8688\_processed\_gene\_0.5  
 hypothetical protein HGMM\_F07E12C19

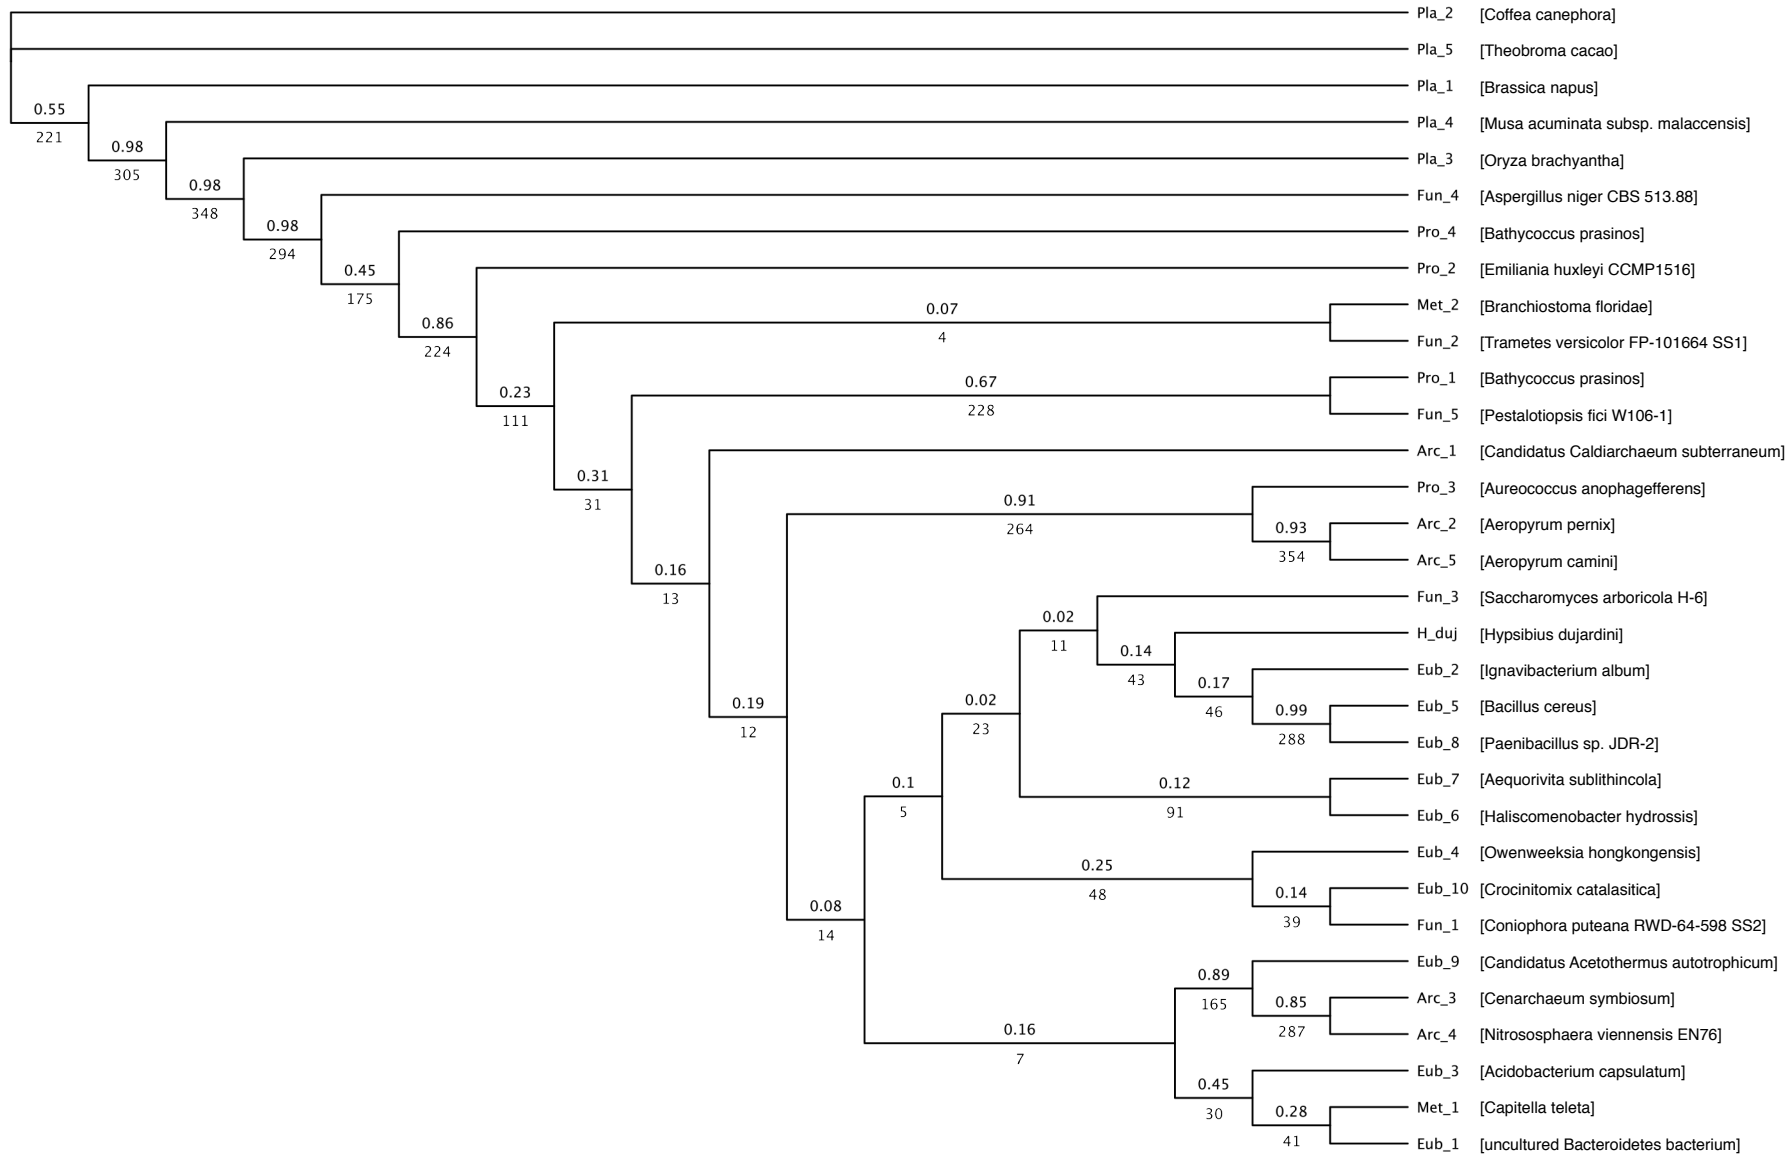

snap\_masked\_scaffold10032\_size9031\_processed\_gene\_0.5  
 RNA 2'-phosphotransferase

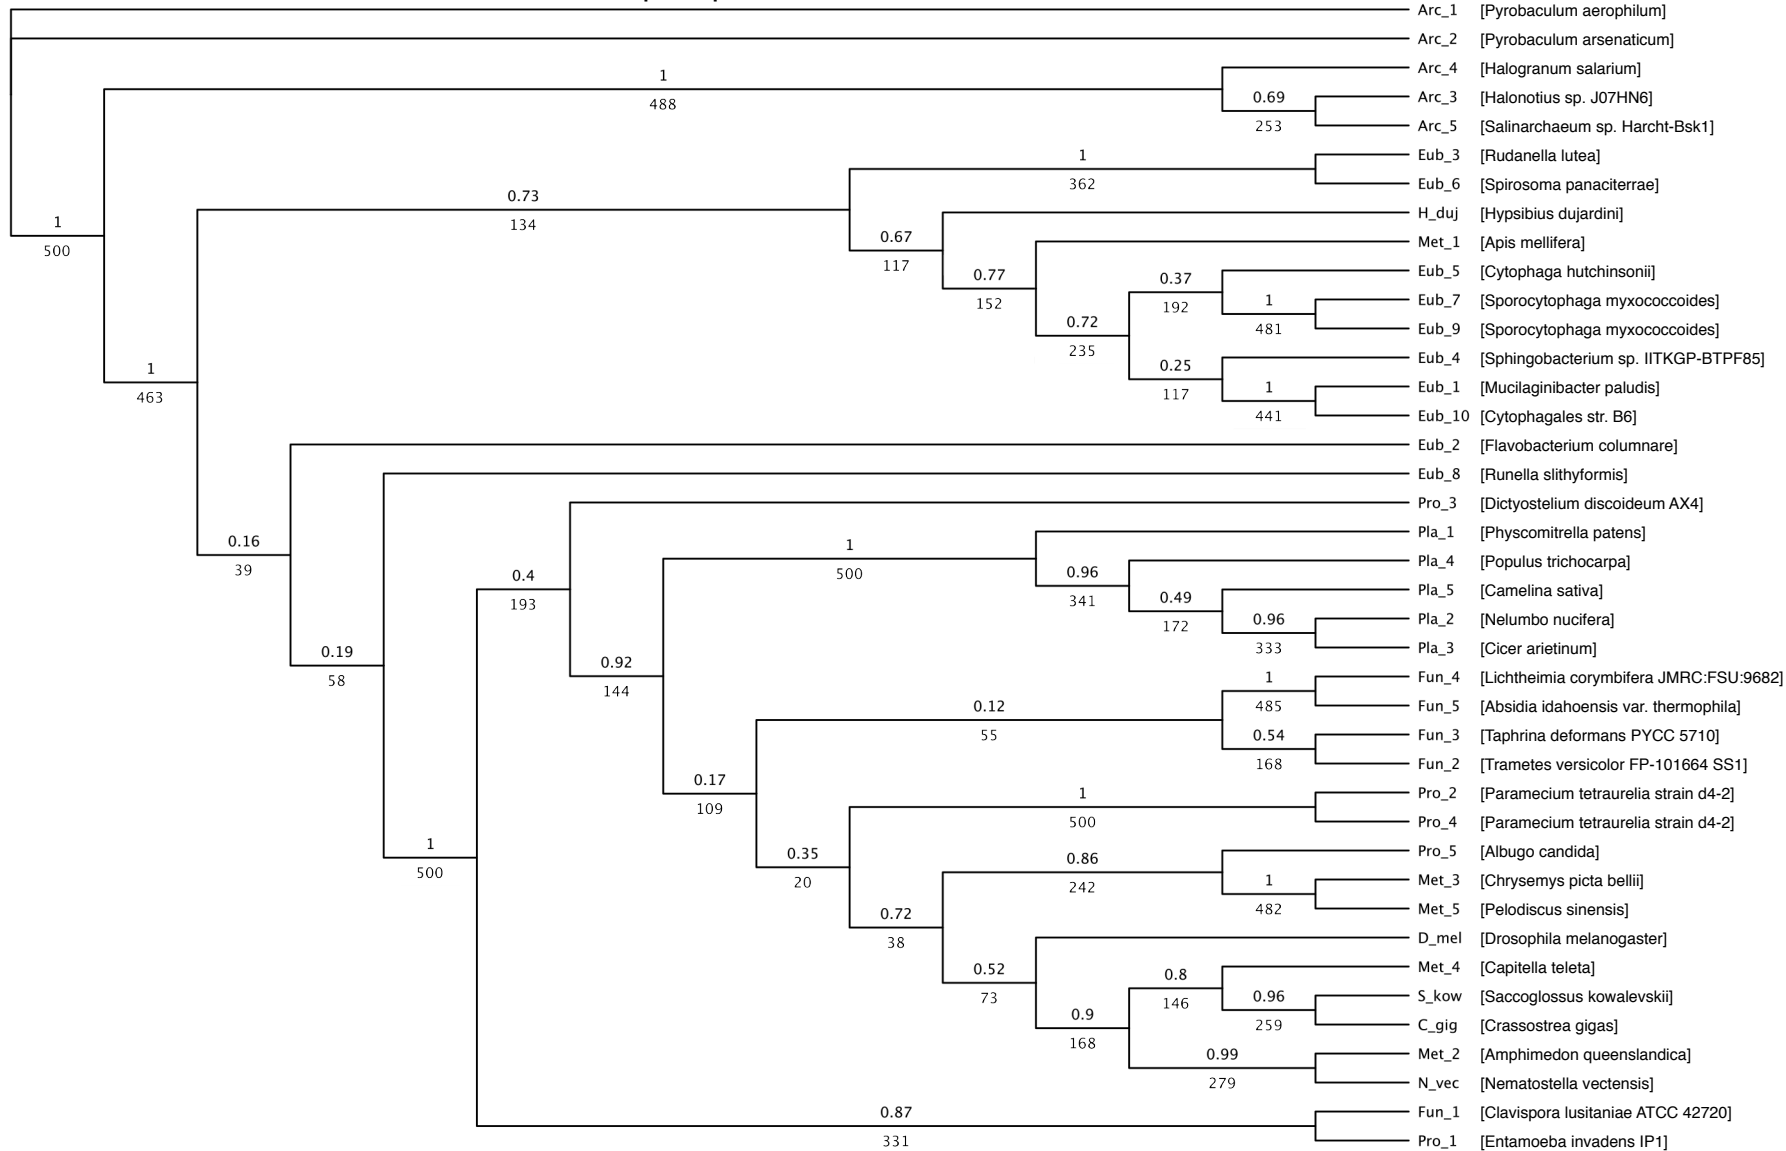

snap\_masked\_scaffold10028\_size9034\_processed\_gene\_0.14  
hypothetical protein BW41\_02662

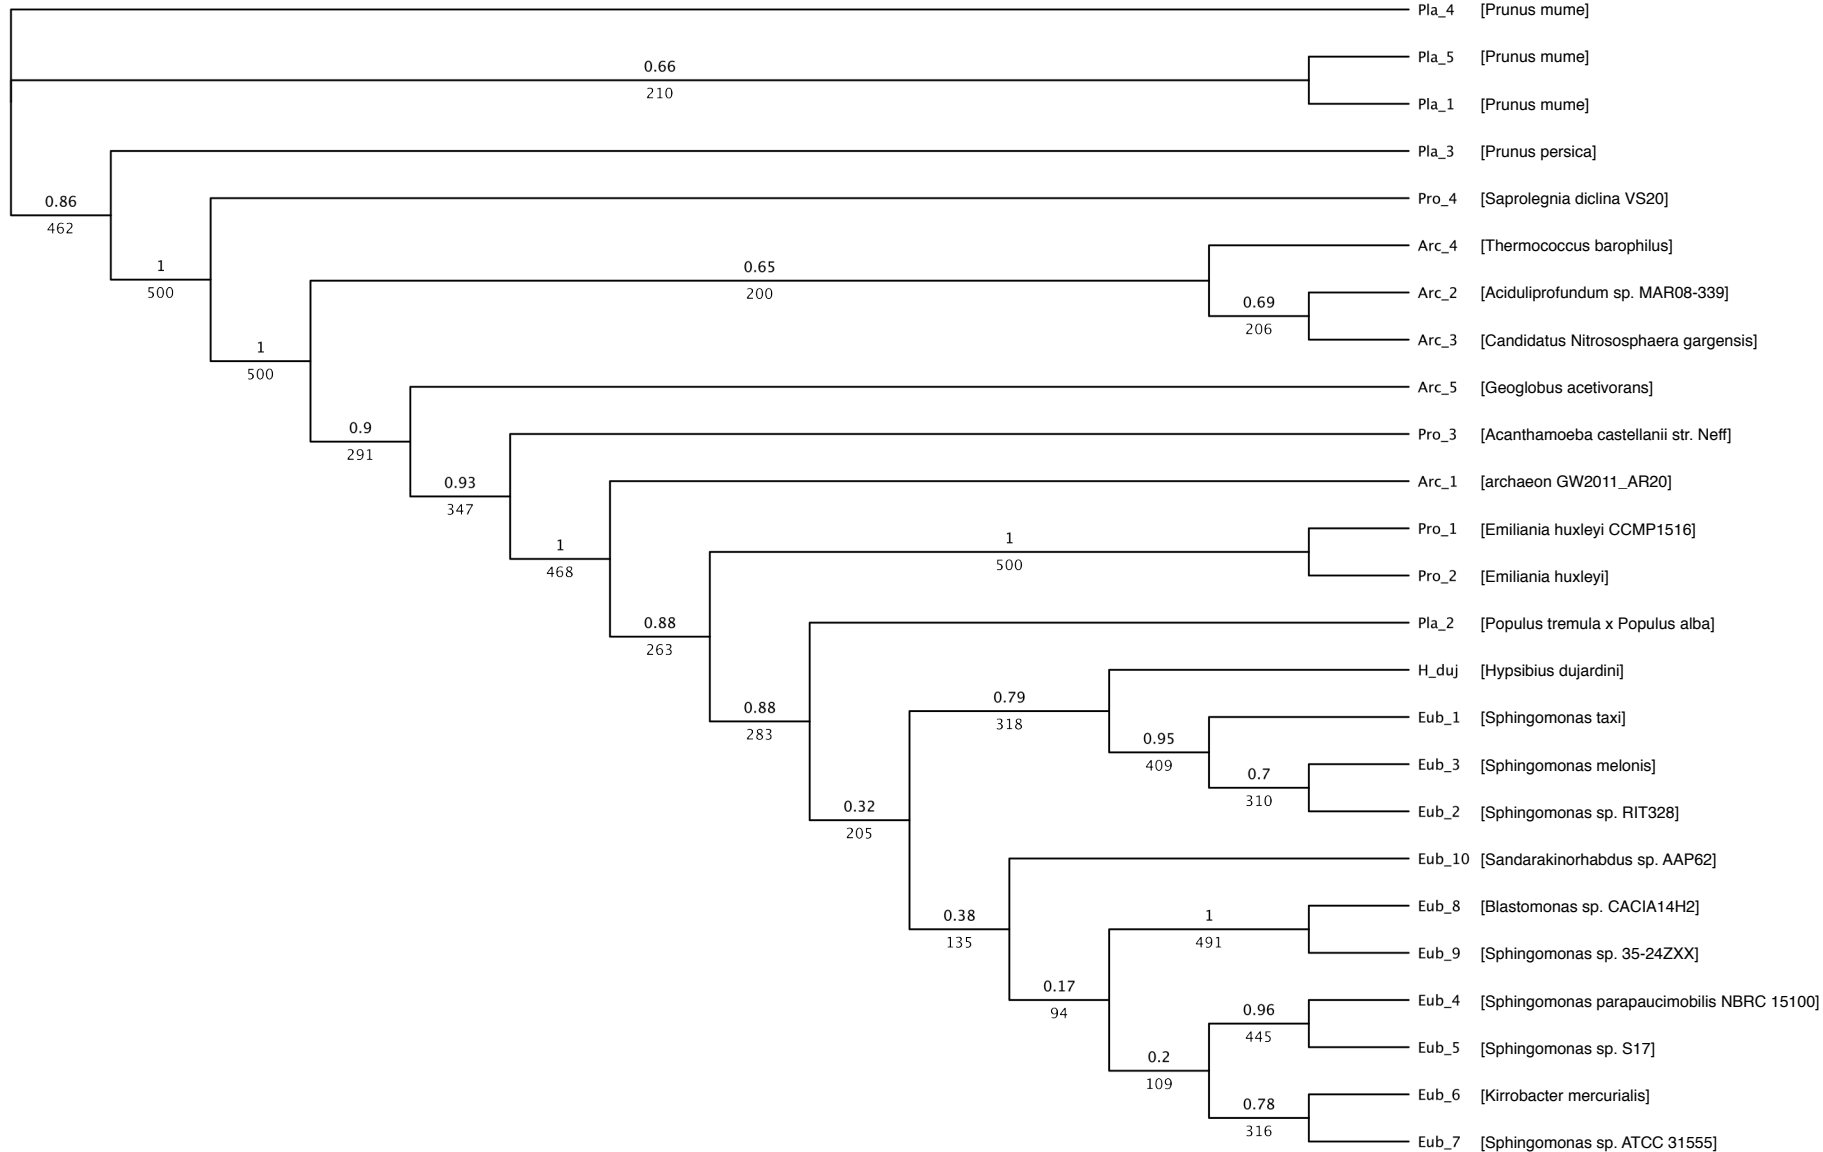

snap\_masked\_scaffold10028\_size9034\_processed\_gene\_0.12  
 LysR family transcriptional regulator

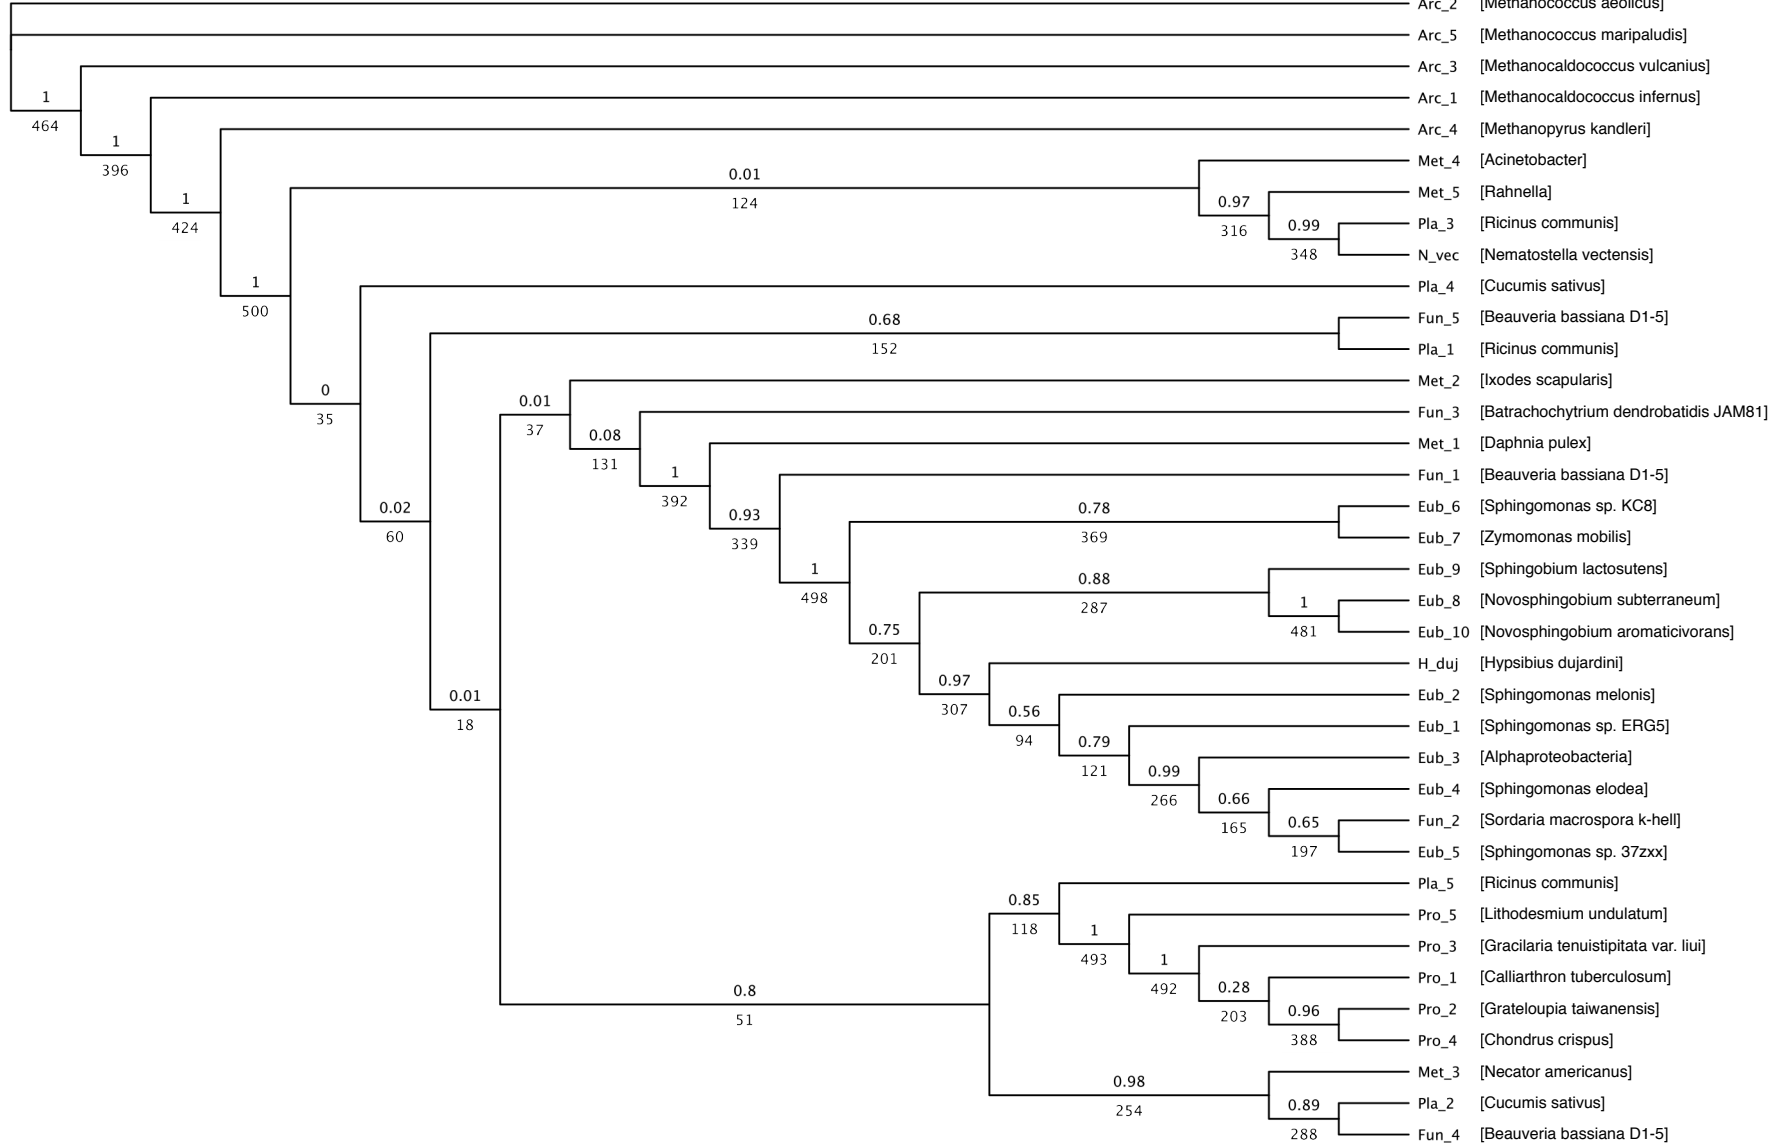

snap\_masked\_scaffold9447\_processed\_gene\_0.6  
aldehyde dehydrogenase

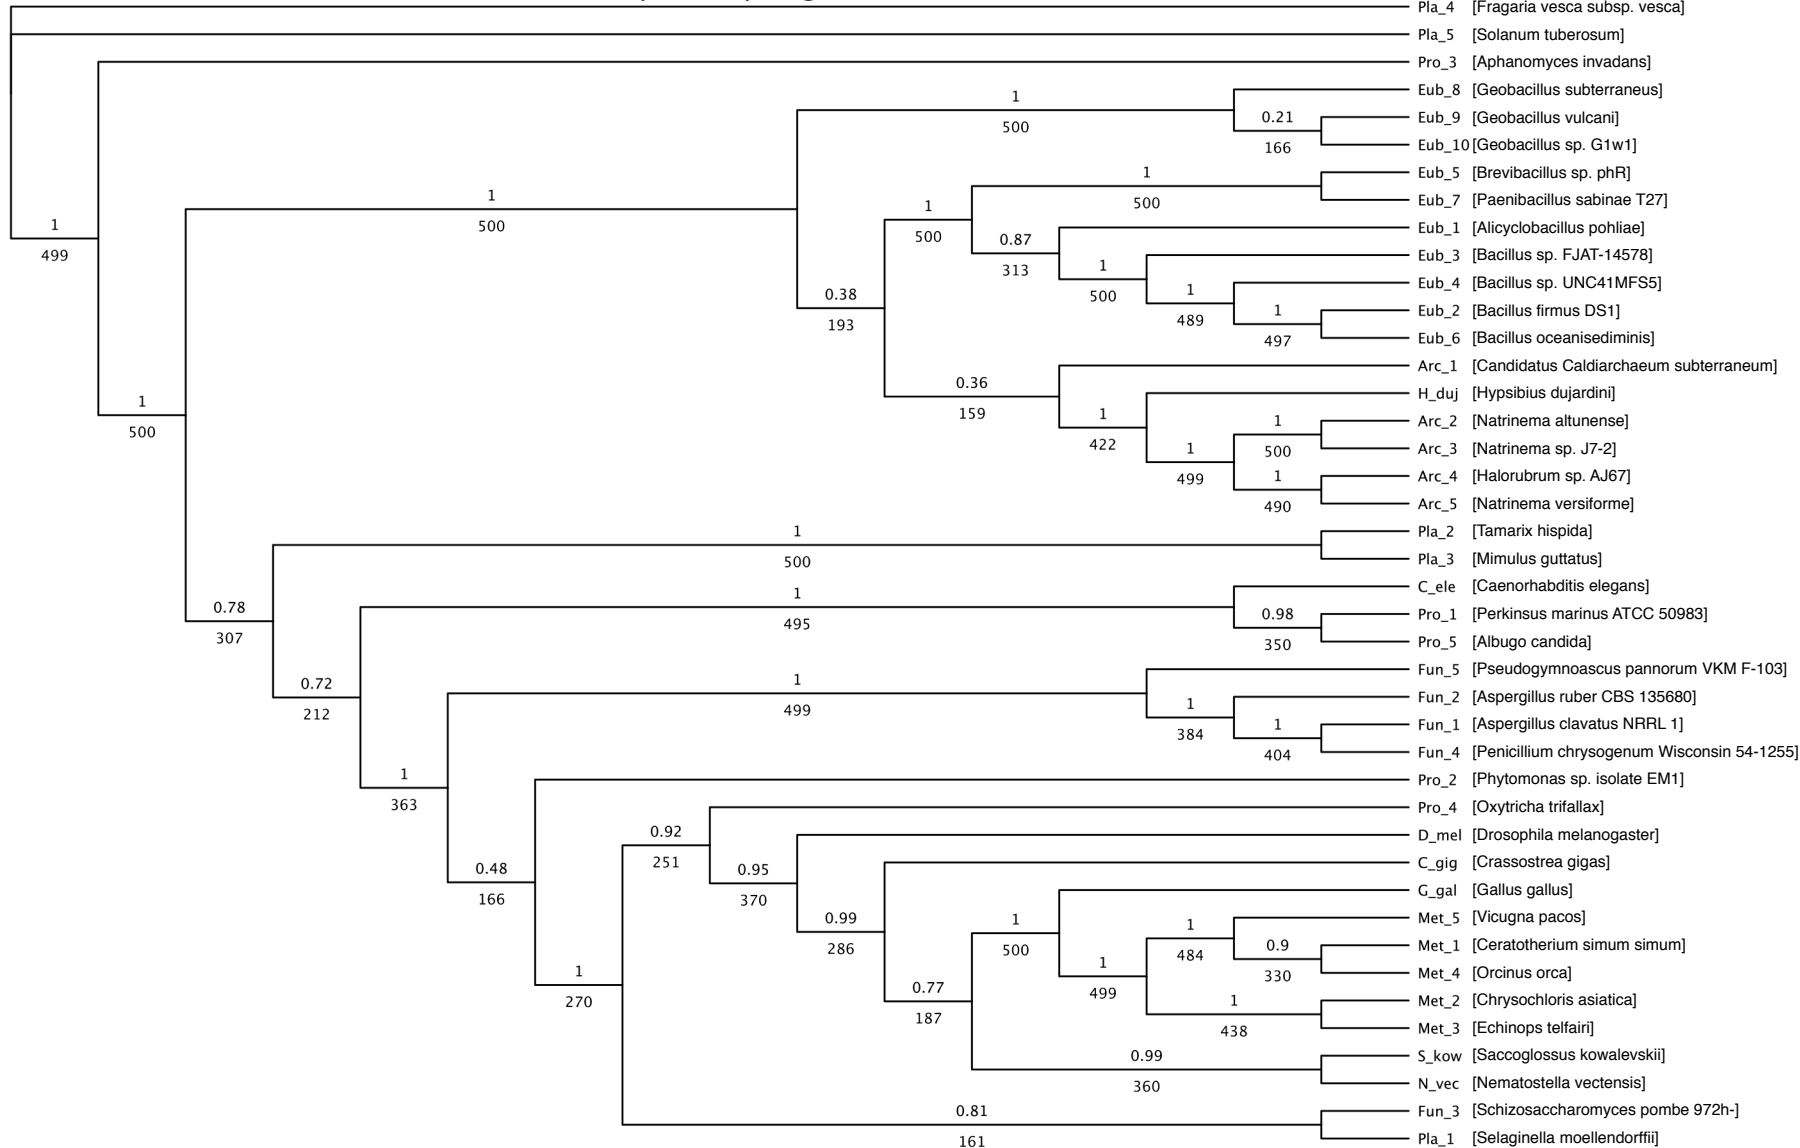

snap\_masked\_scaffold9056\_size9691\_processed\_gene\_0.3  
 hypothetical protein ACD\_44C00357G0002

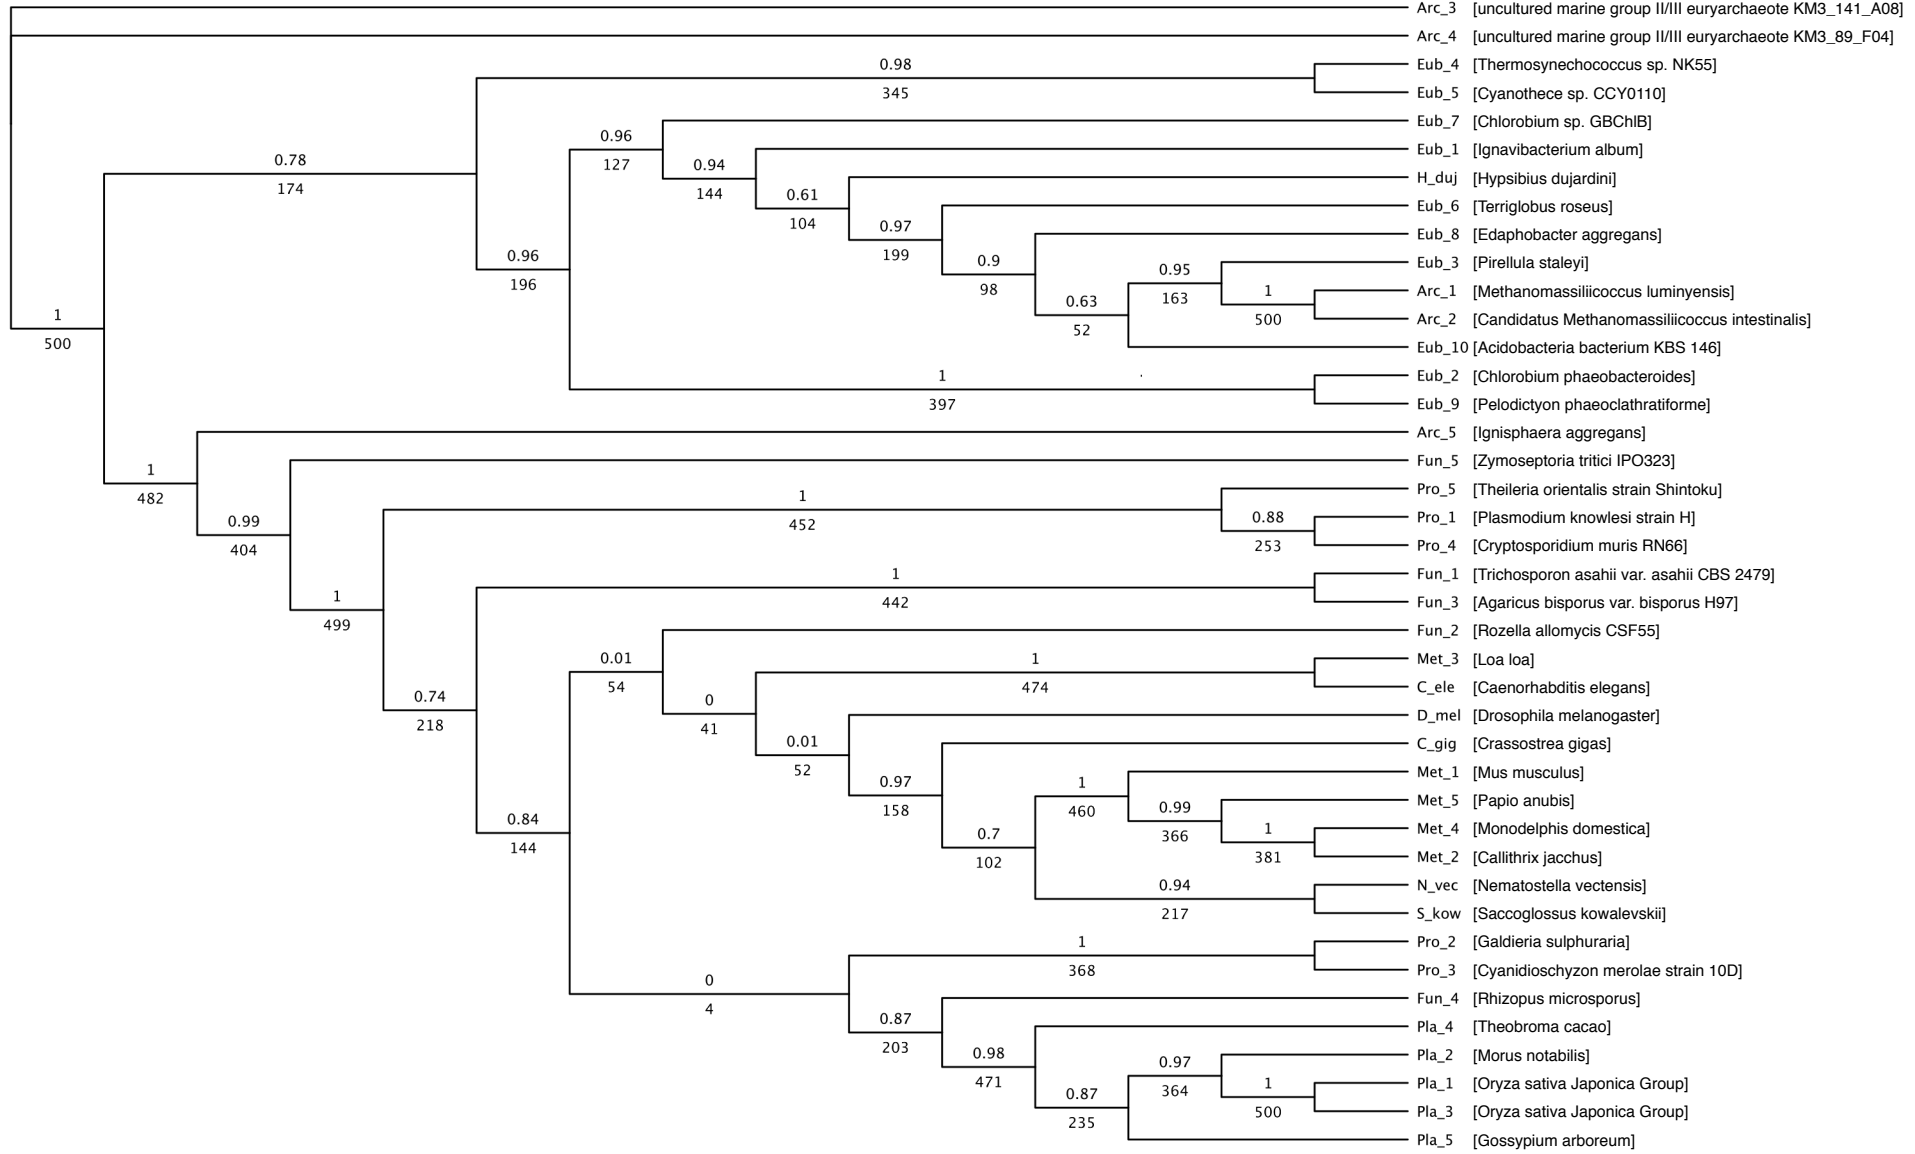

snap\_masked\_scaffold8624\_processed\_gene\_0.6  
short-chain dehydrogenase

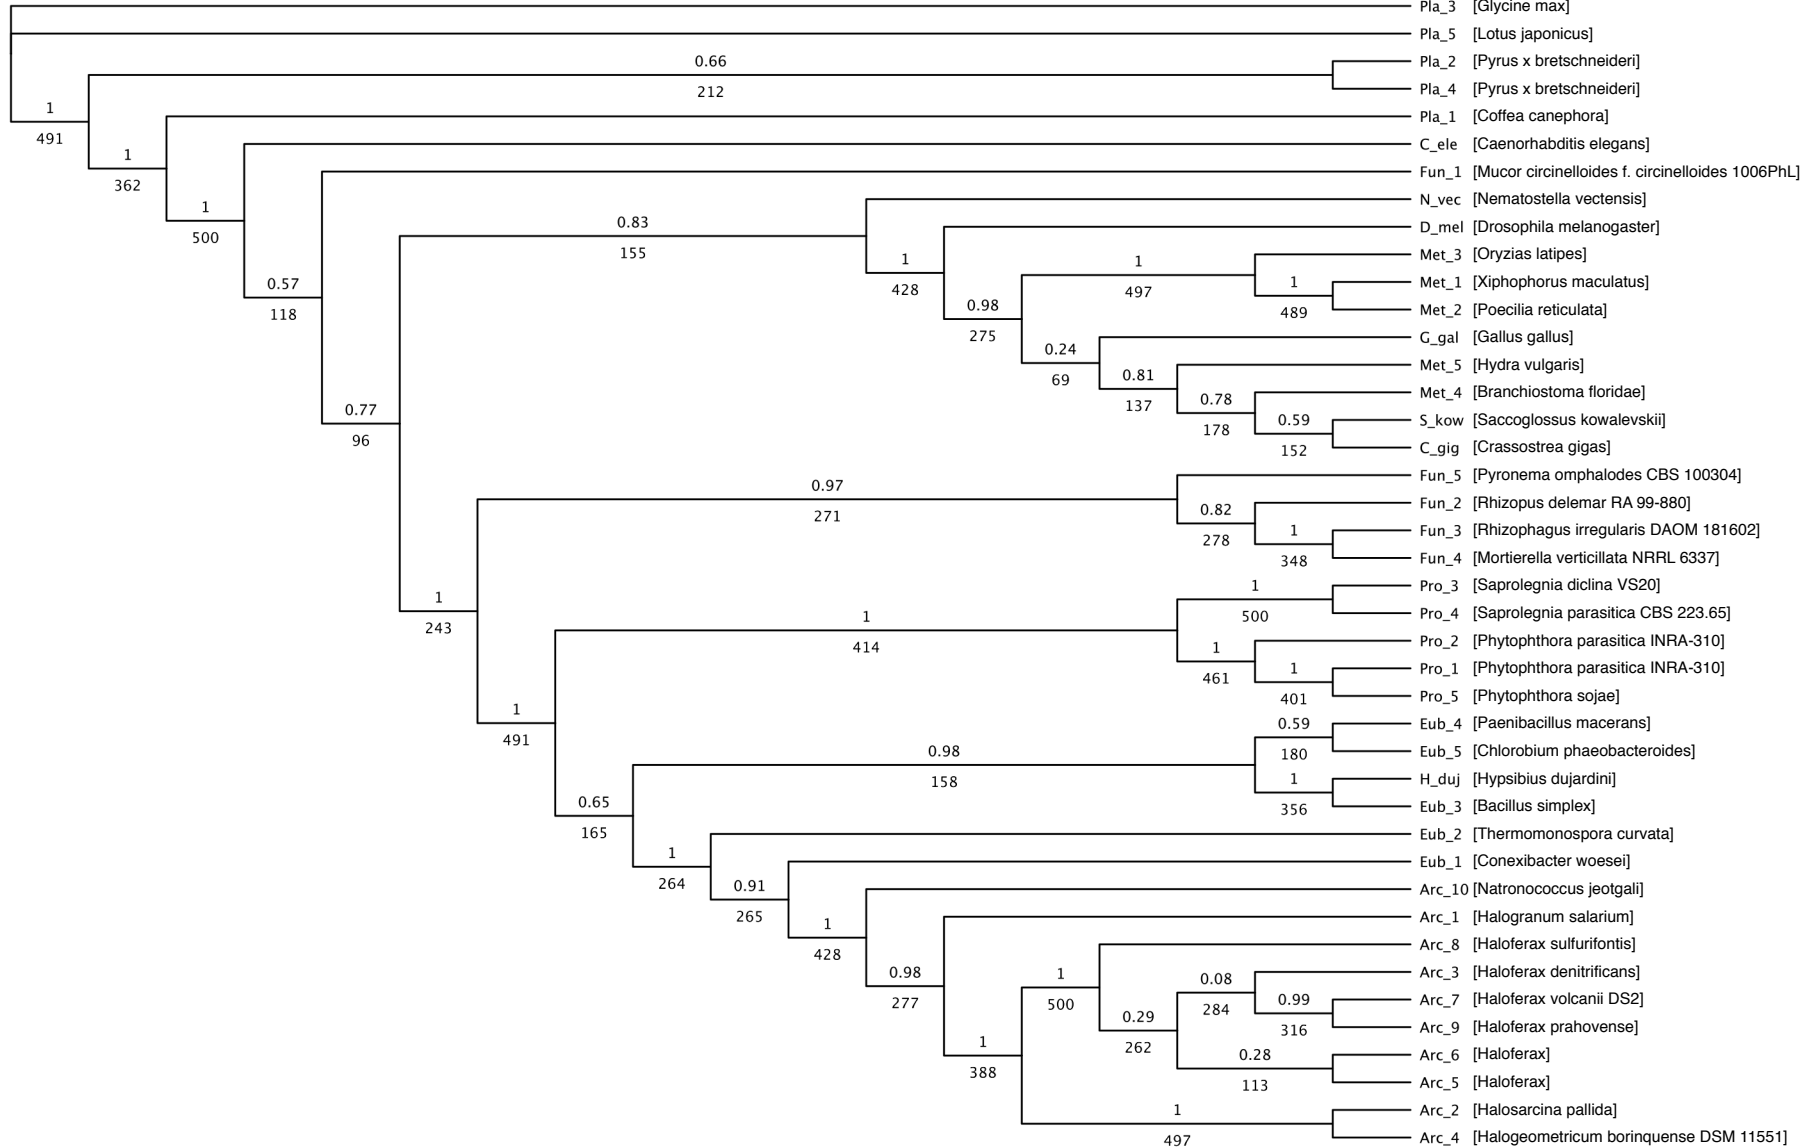

snap\_masked\_scaffold8578\_size10052\_processed\_gene\_0.10  
 polysaccharide biosynthesis protein CapD

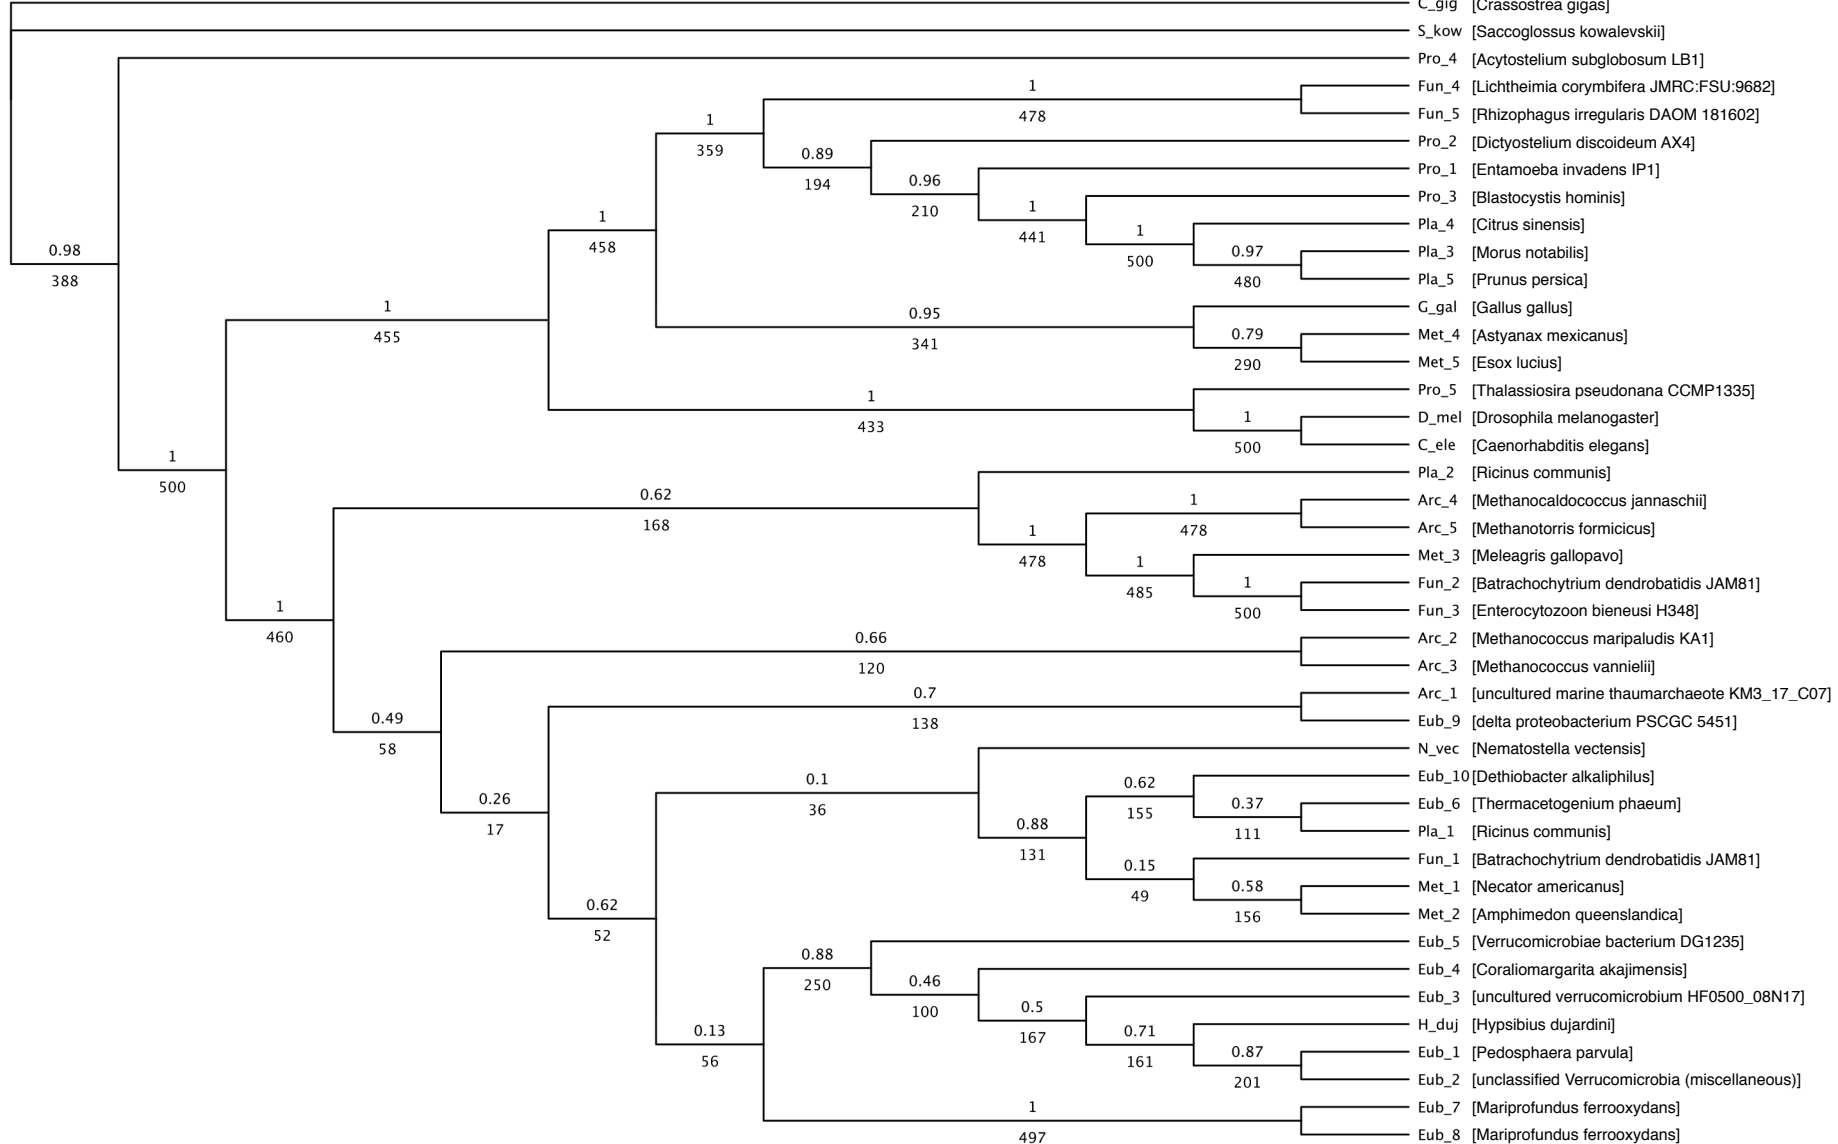



## recombinase RecR

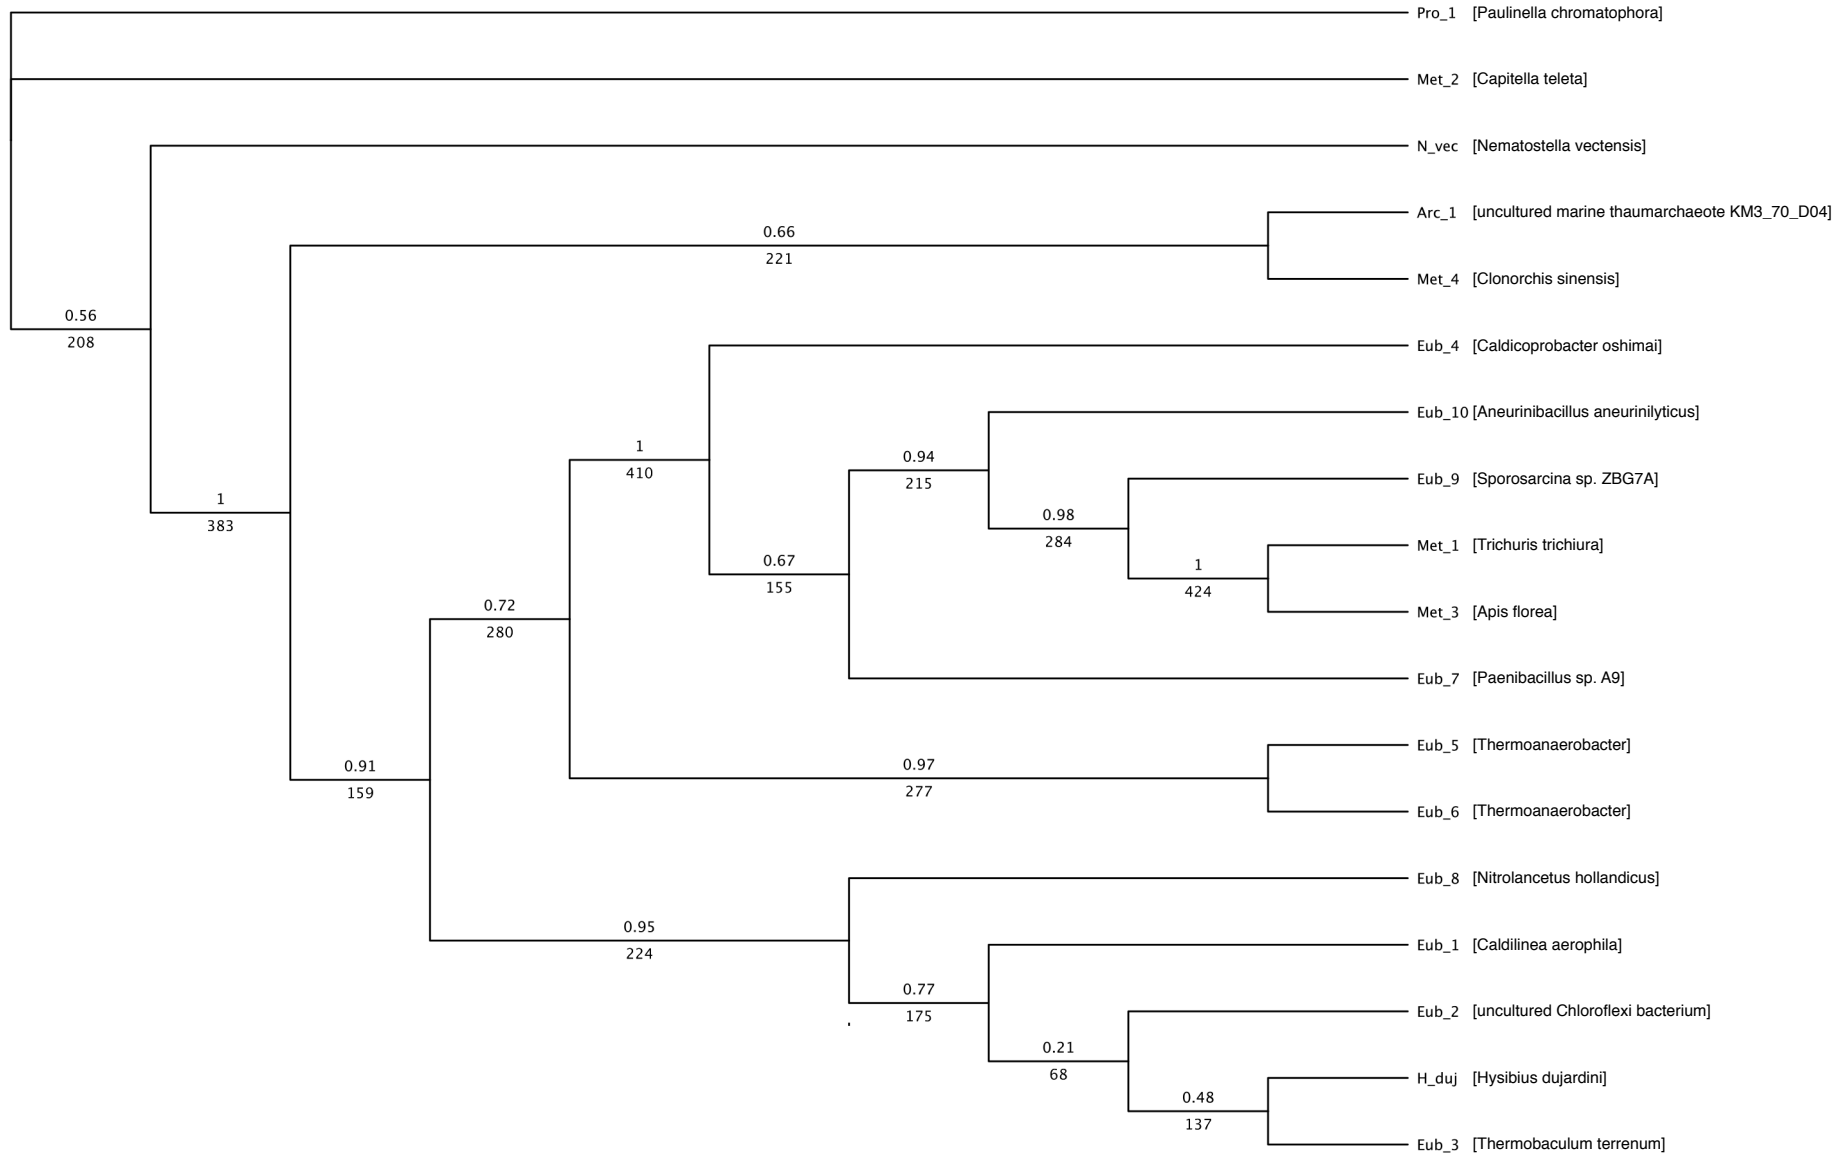

snap\_masked\_scaffold5501\_size13528\_processed\_gene\_0.4

hypothetical protein

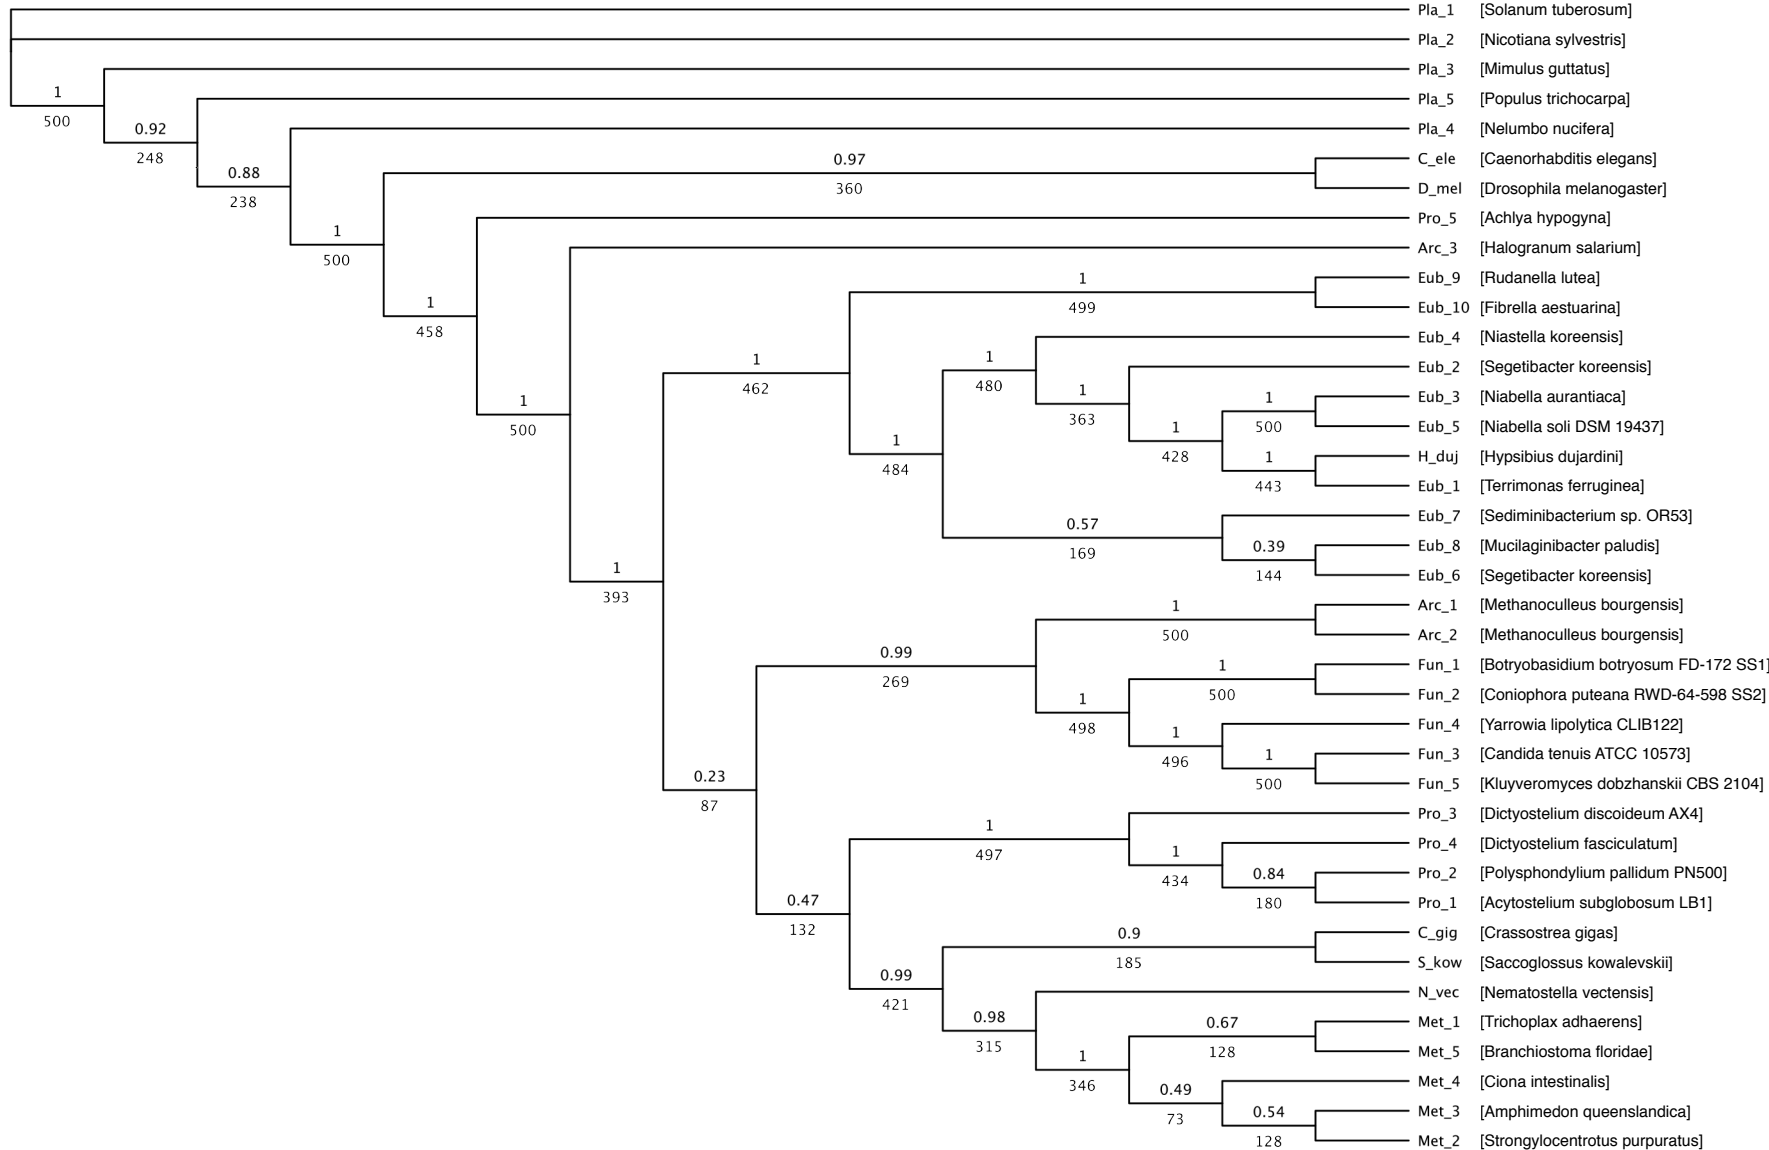

snap\_masked\_scaffold5085\_processed\_gene\_0.8  
RNA helicase

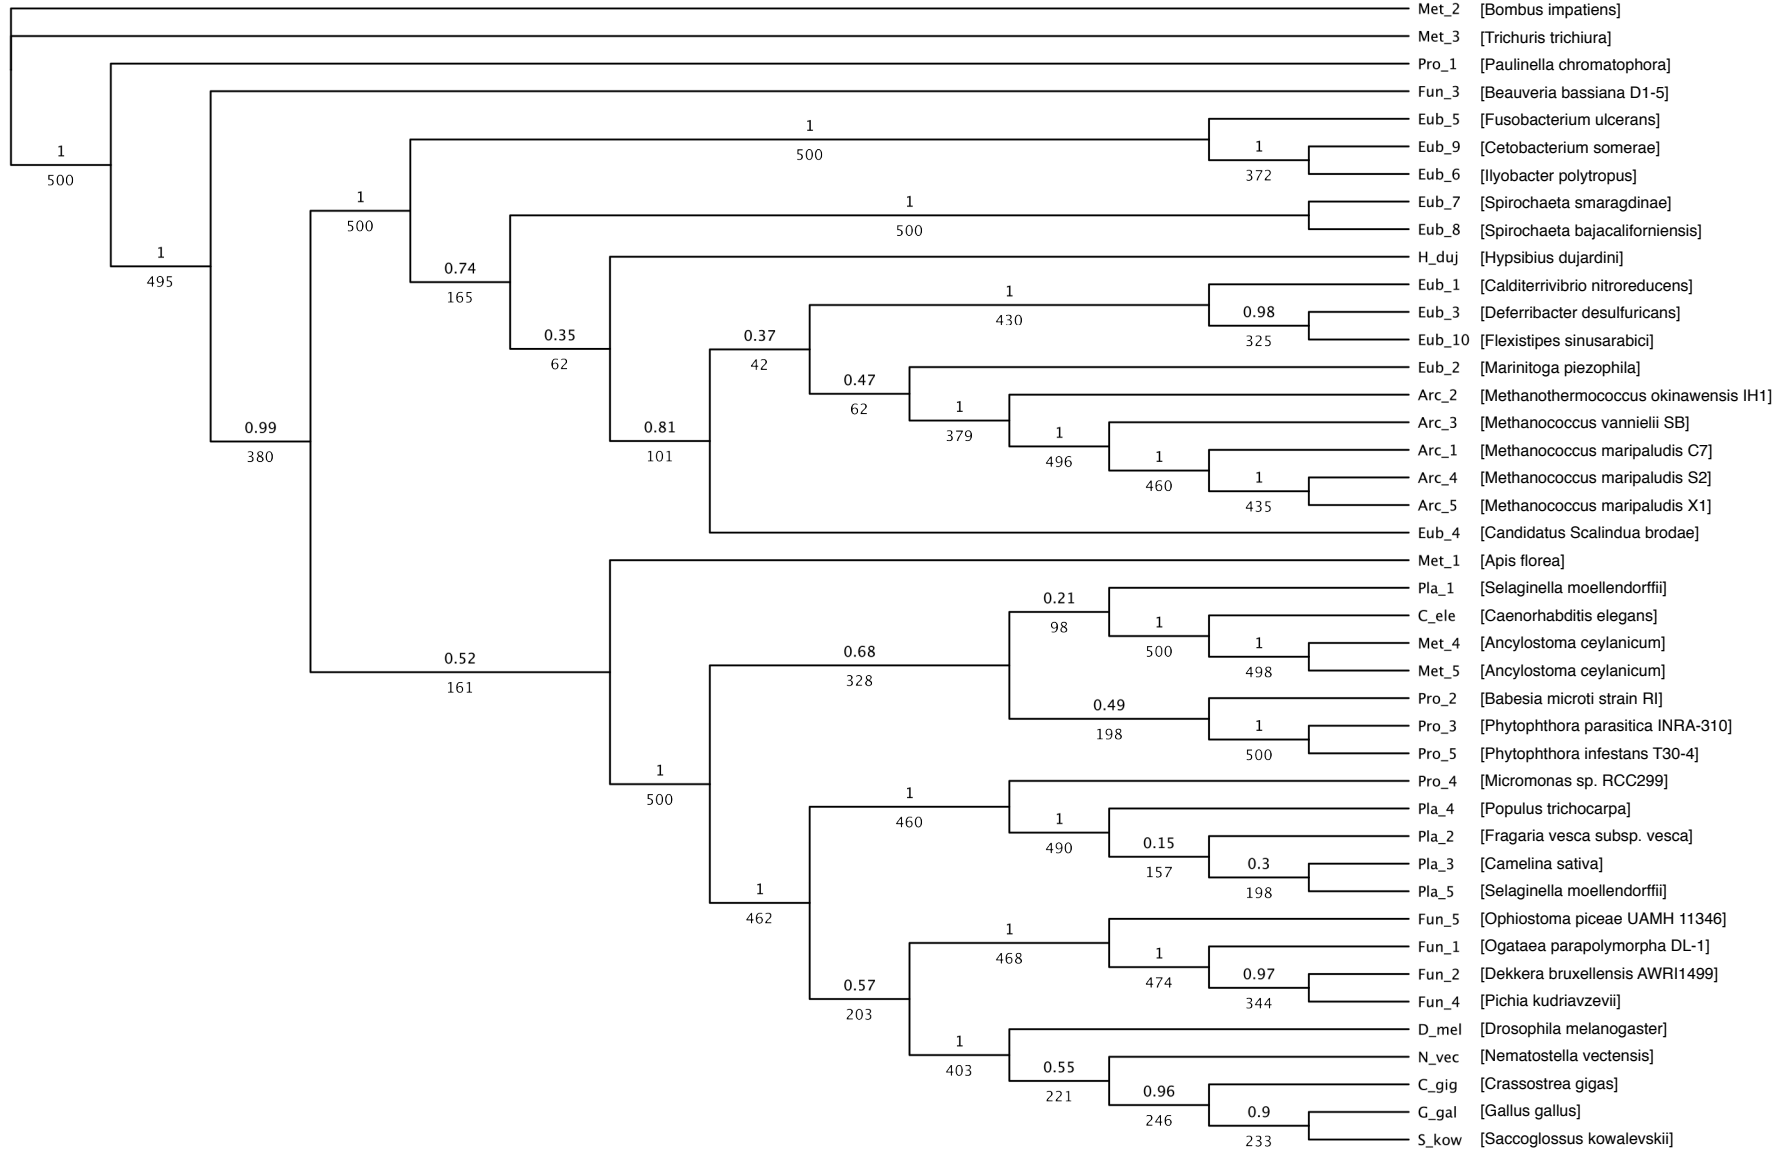

snap\_masked\_scaffold2358\_size21708\_processed\_gene\_0.4  
hypothetical protein mv\_R860

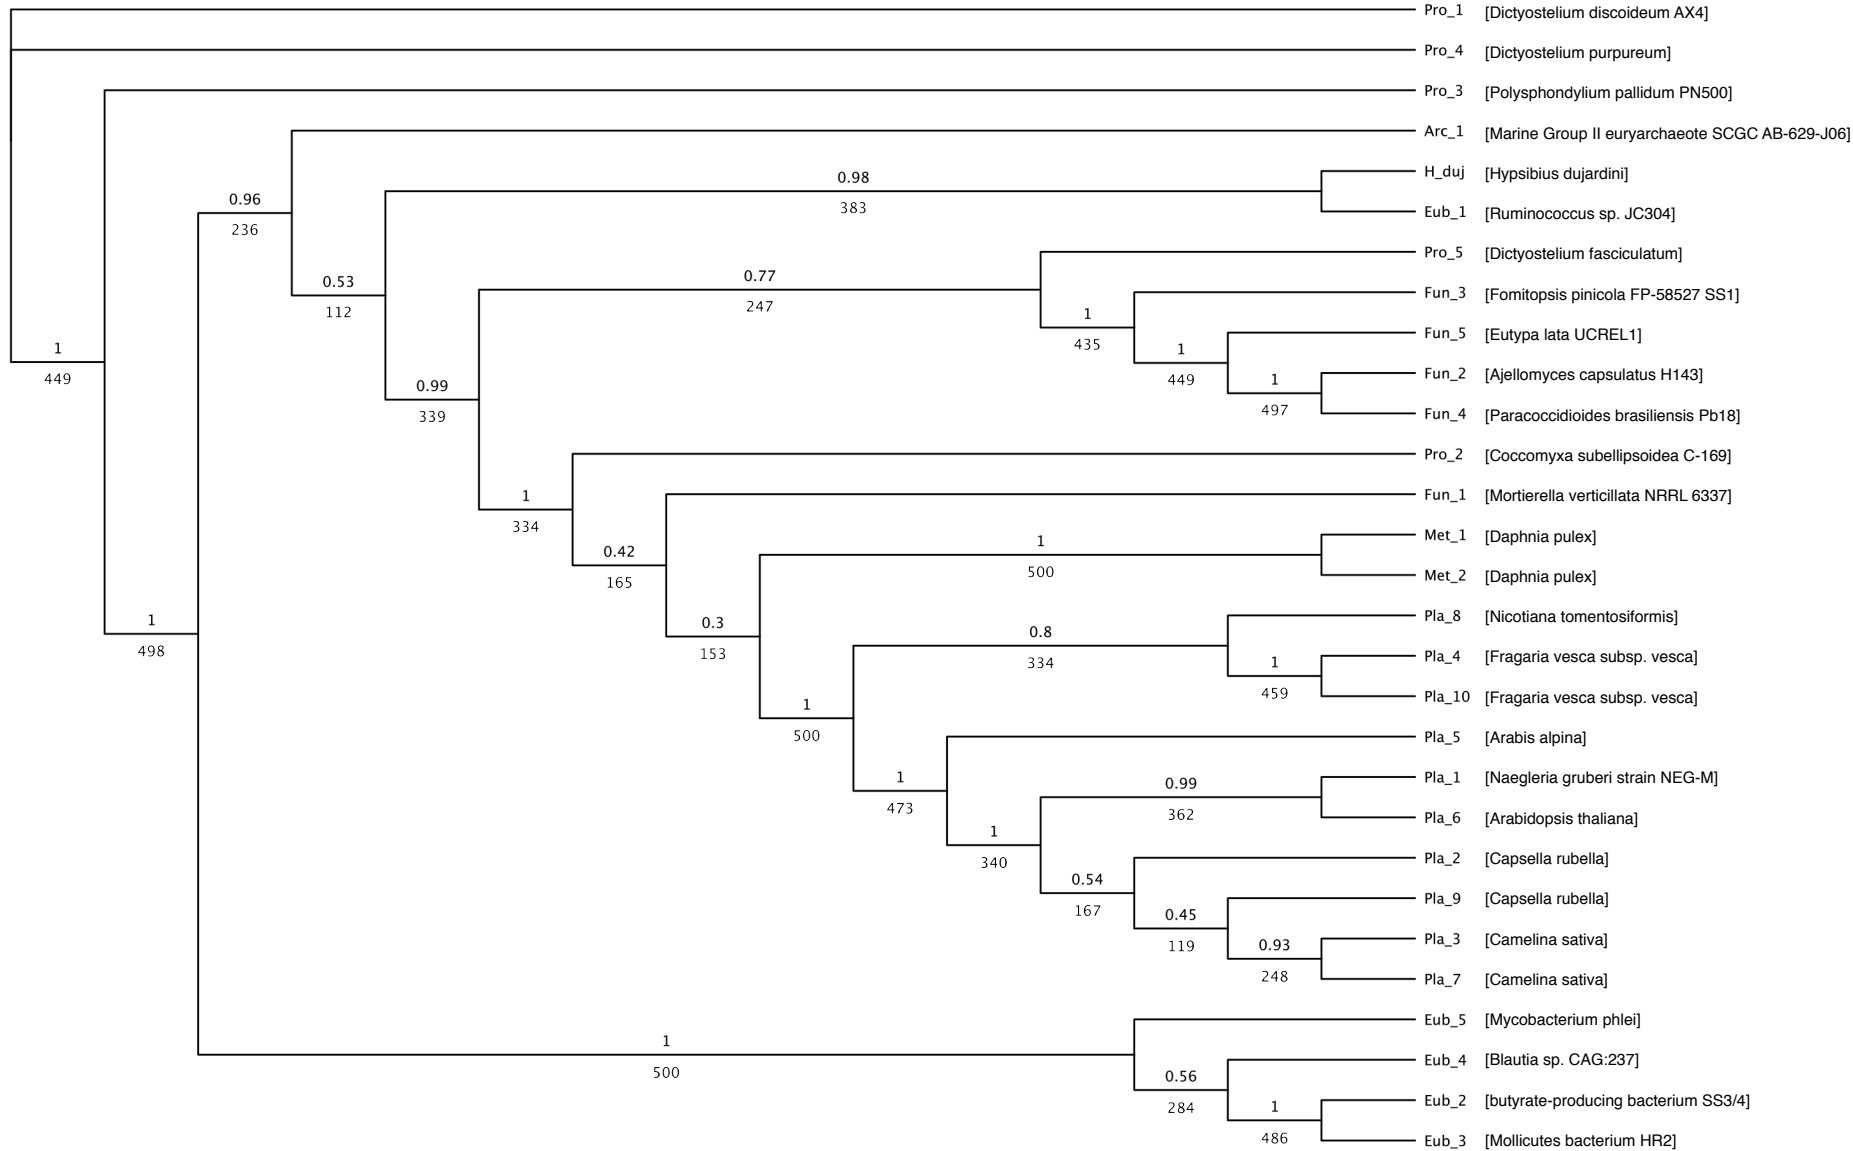

snap\_masked\_scaffold4718\_size14934\_processed\_gene\_0.15  
preprotein translocase subunit SecY

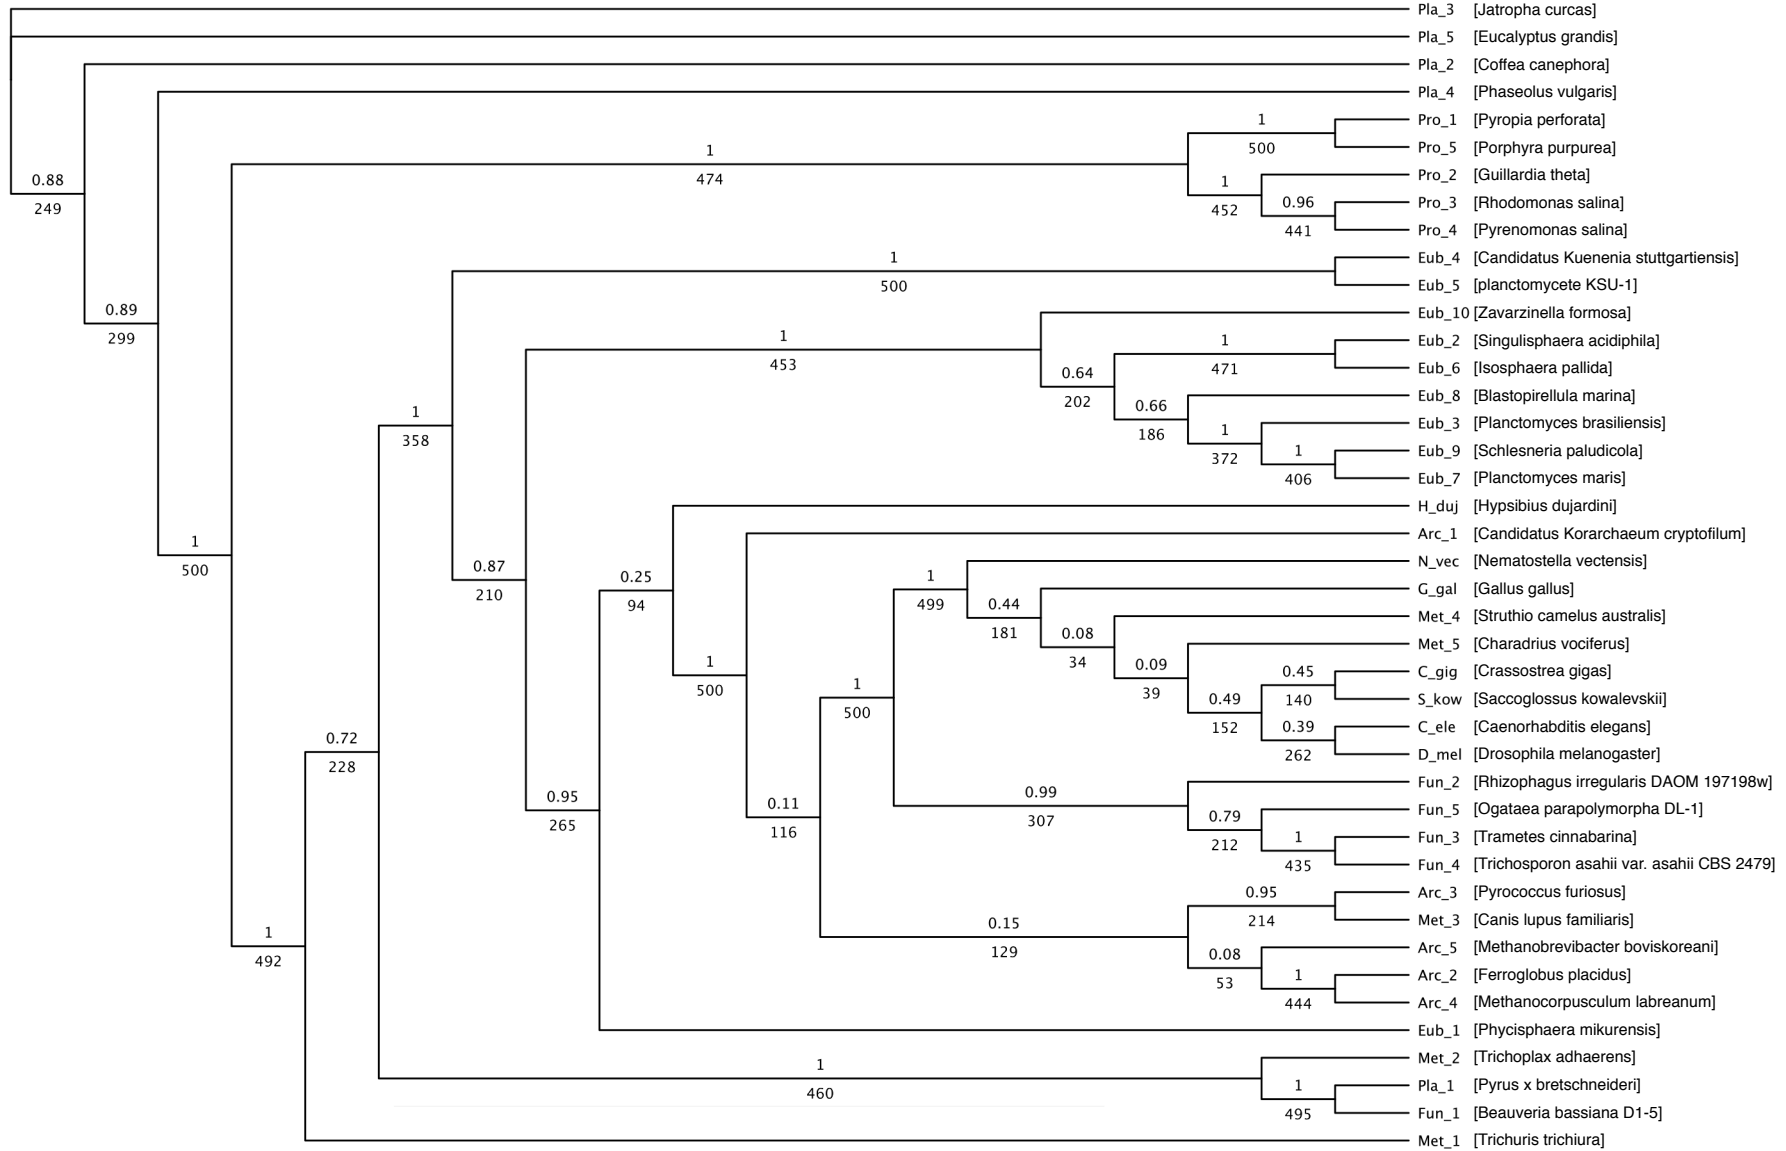

snap\_masked\_scaffold2280\_size22025\_processed\_gene\_0.10  
NmrA family protein

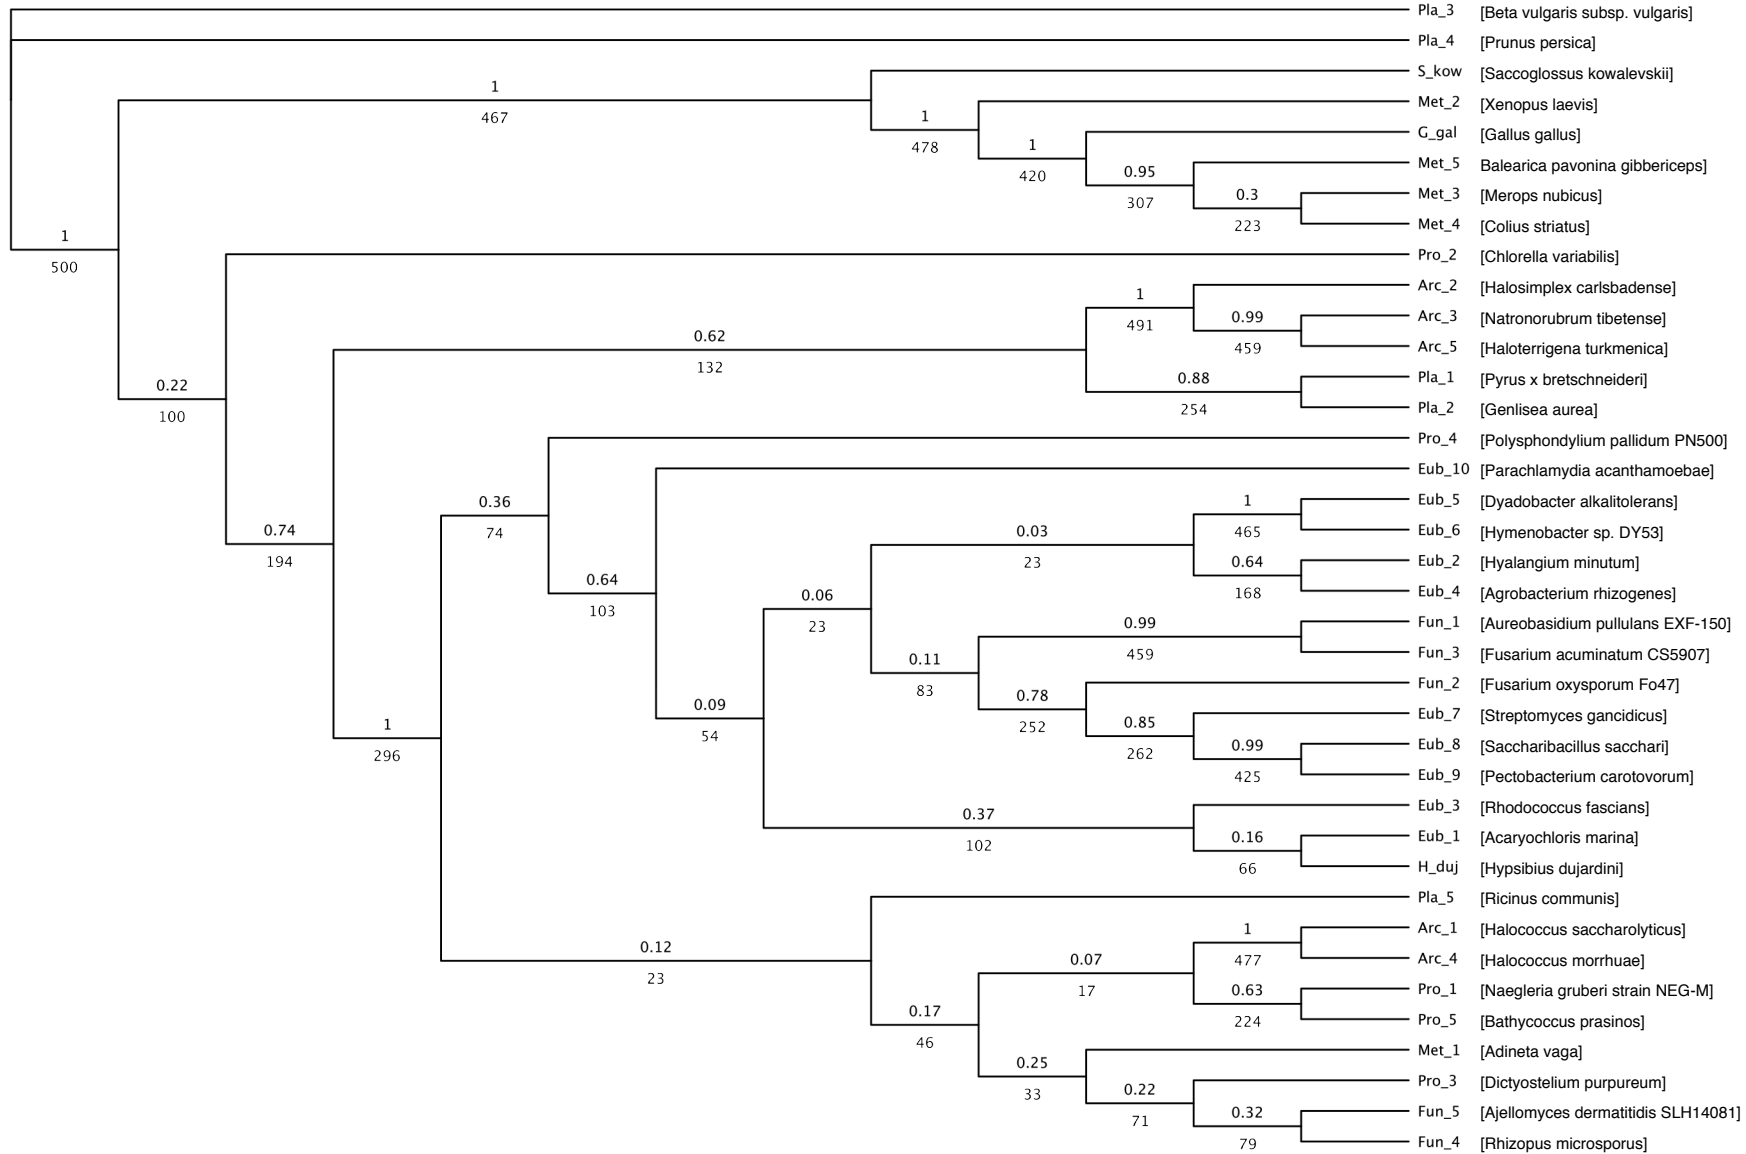

snap\_masked\_scaffold2263\_size22100\_processed\_gene\_0.5  
alpha/beta hydrolase

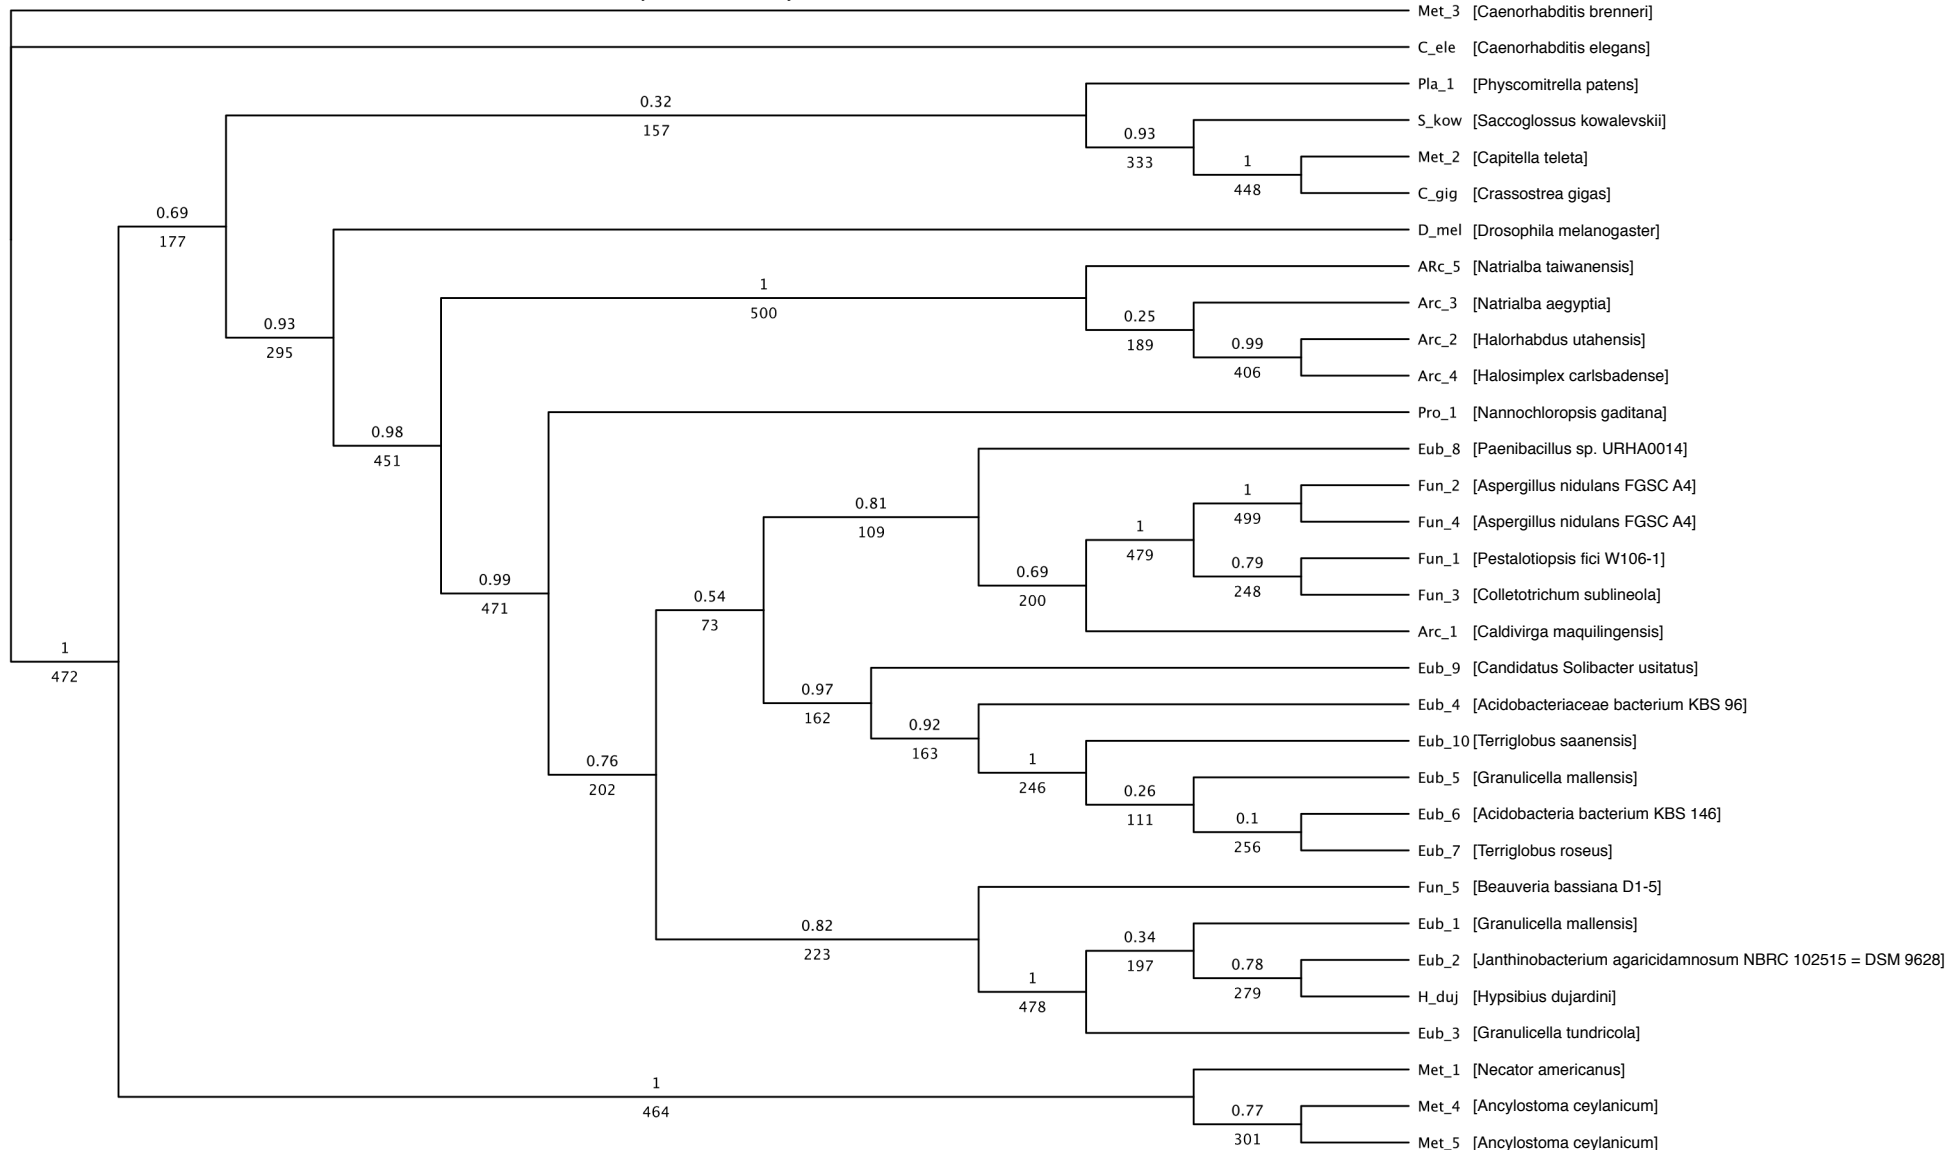

glutamyl-tRNA synthetase

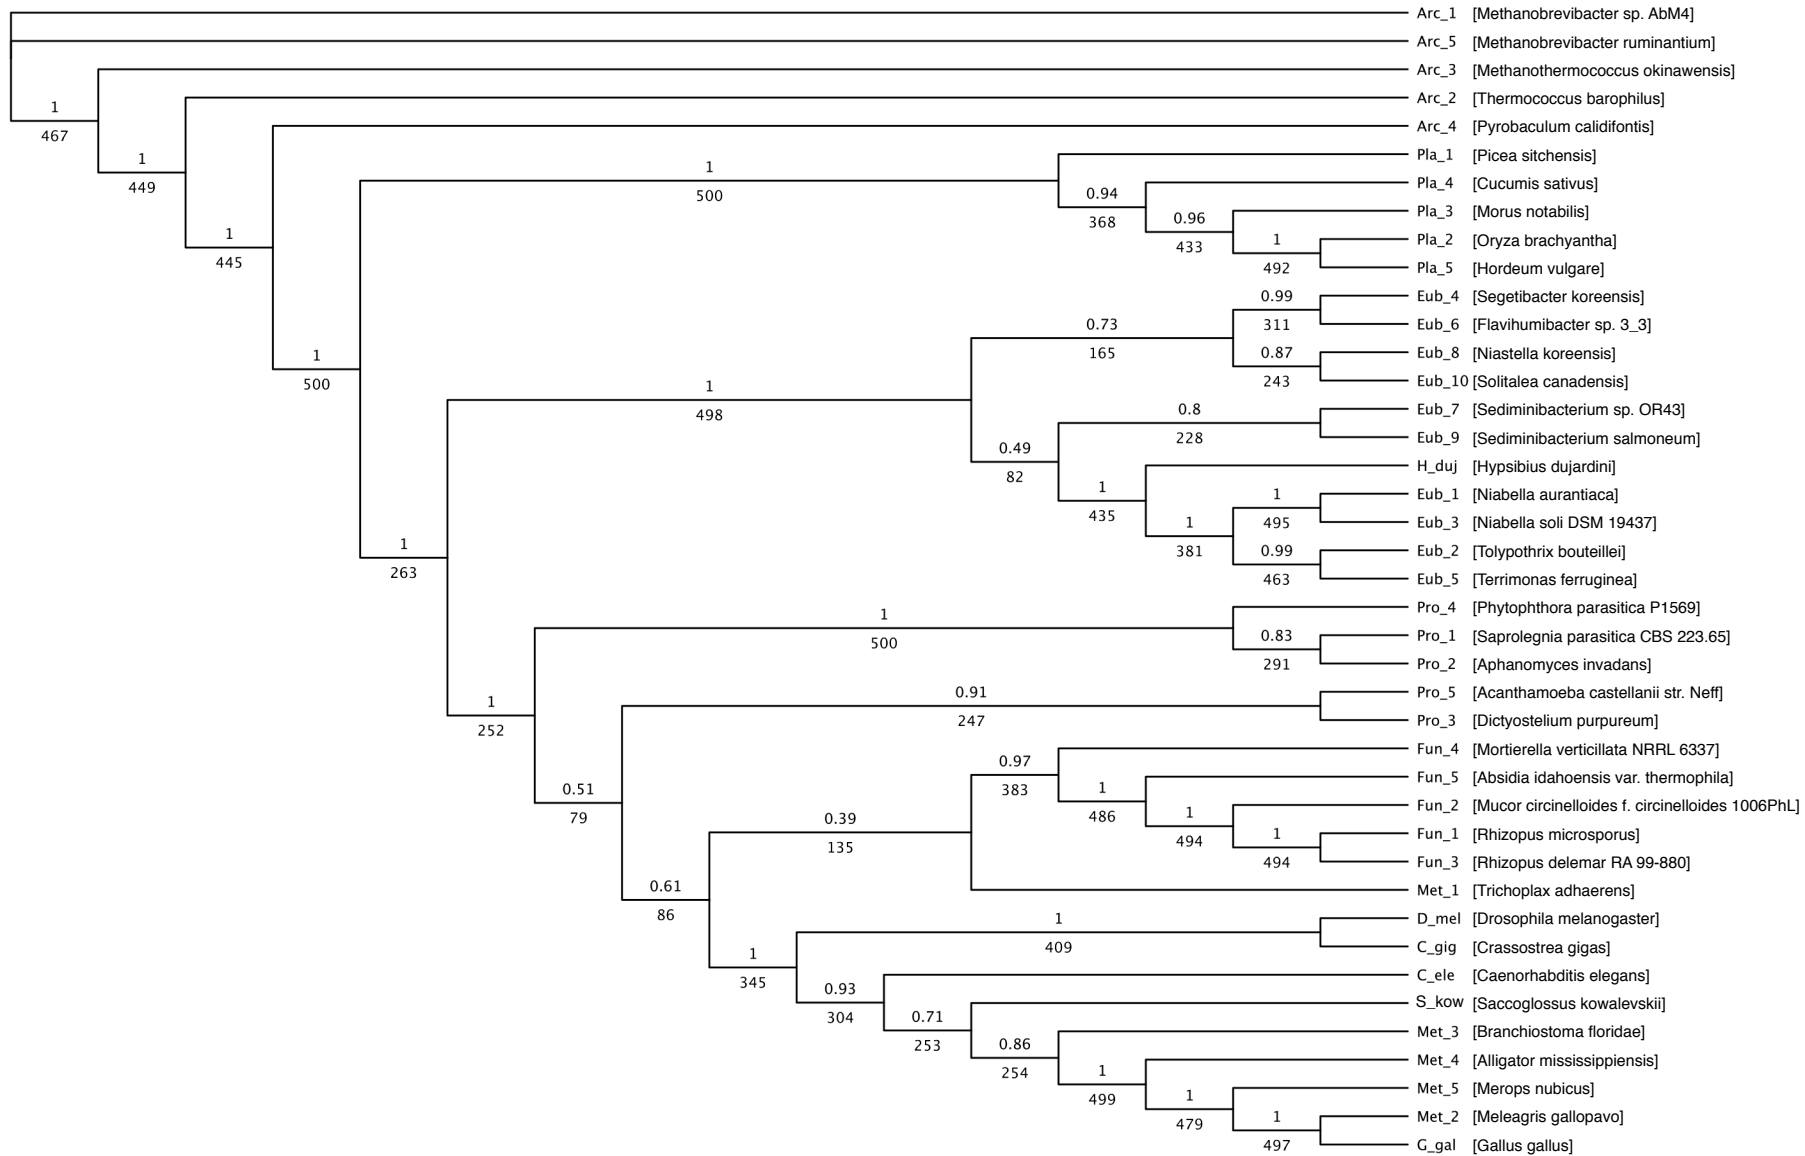



snap\_masked\_scaffold1340\_size28252\_processed\_gene\_0.28

short-chain dehydrogenase

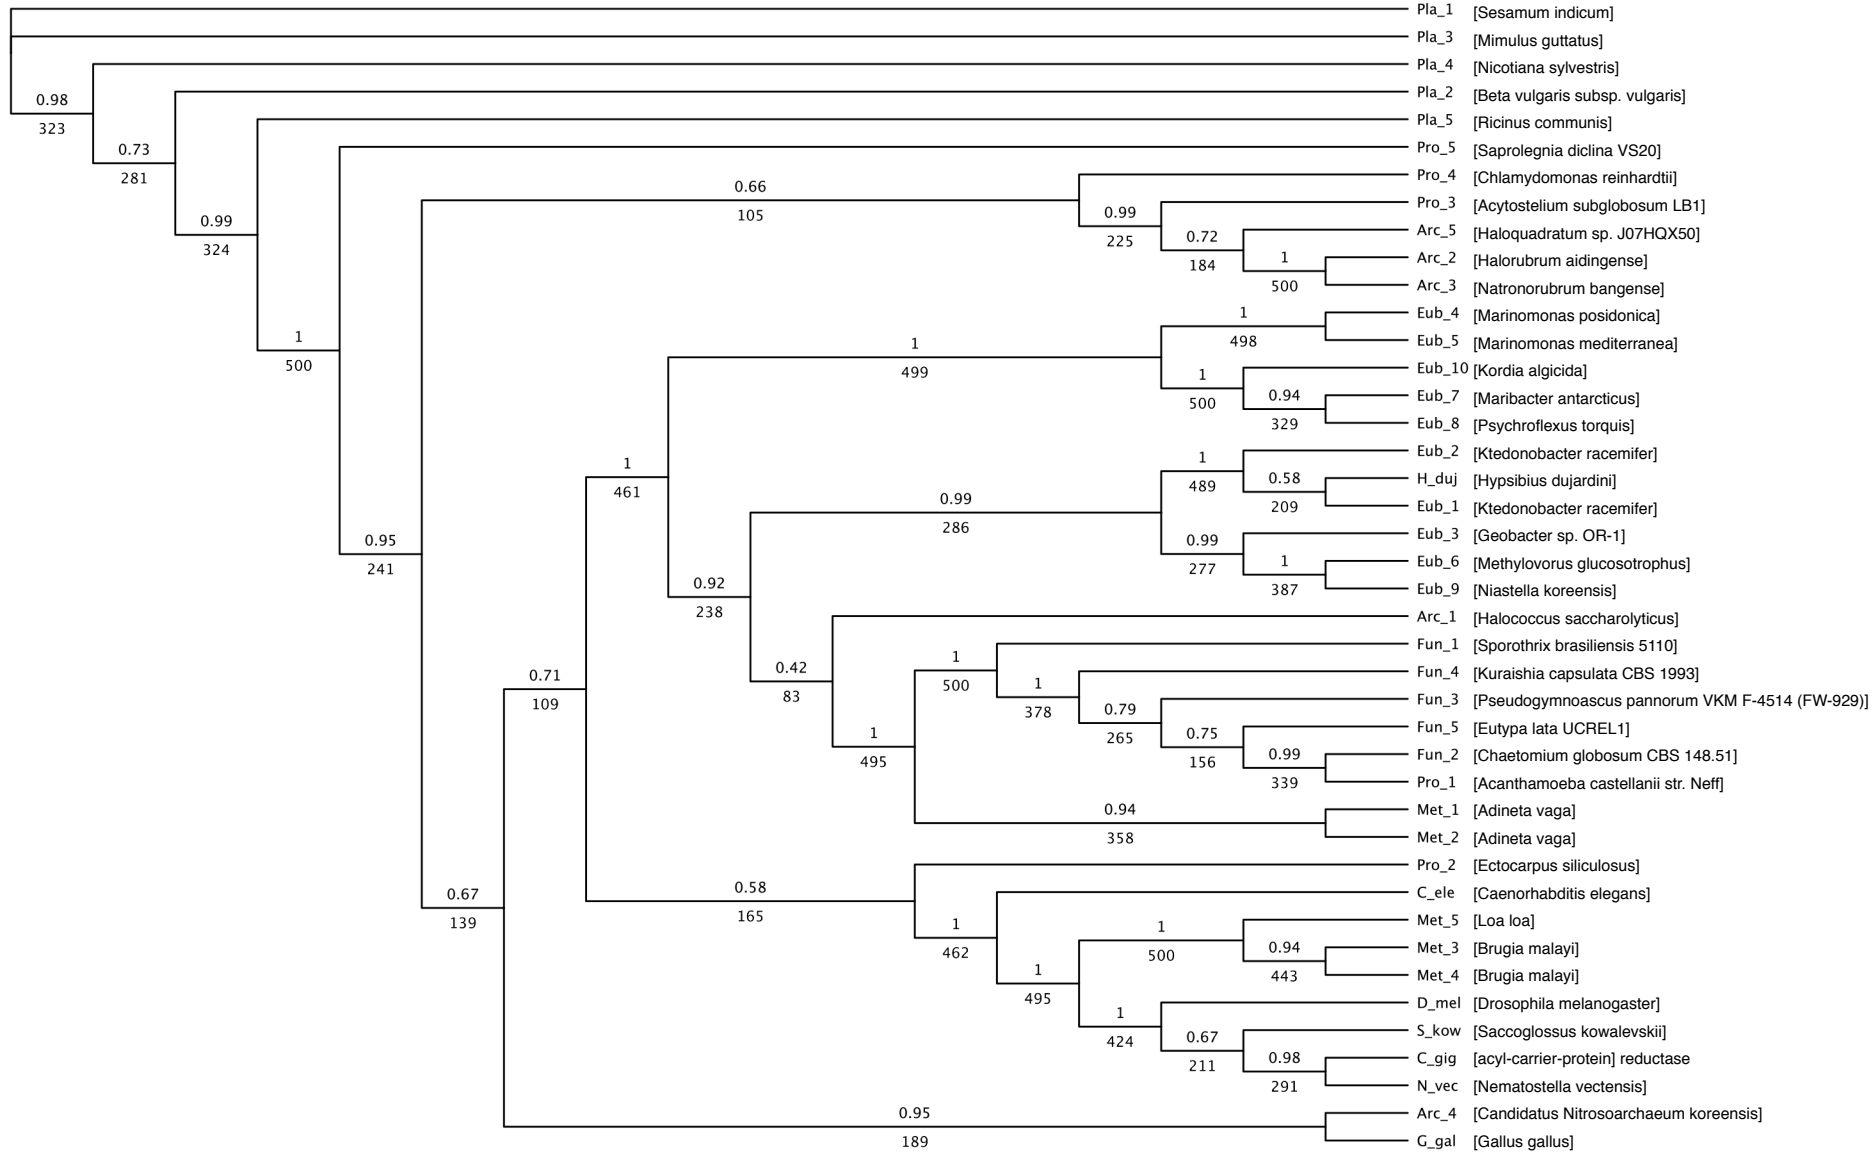

# snap\_masked\_scaffold1229\_processed\_gene\_0.12

including n-acetylases of ribosomal protein

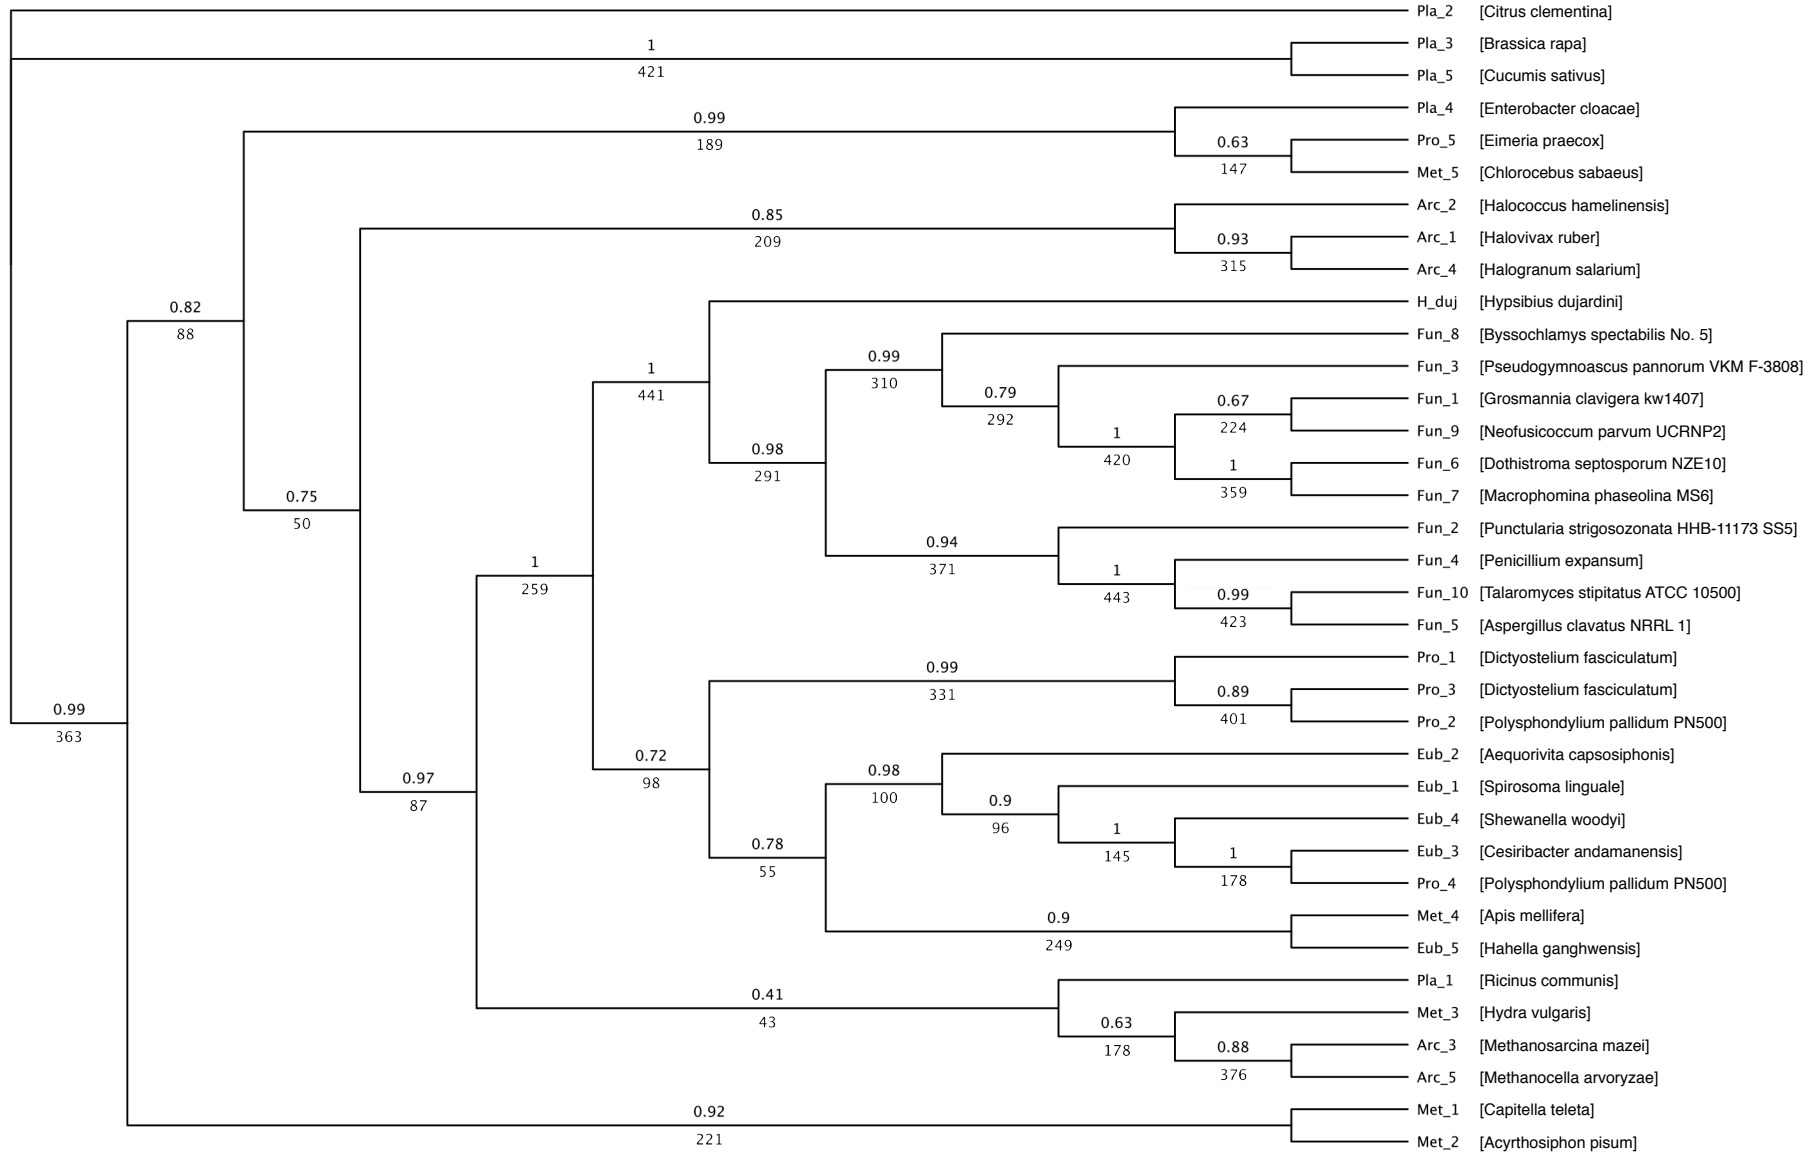

snap\_masked\_scaffold1017\_size31835\_processed\_gene\_0.17  
deoxycytidine triphosphate deaminase

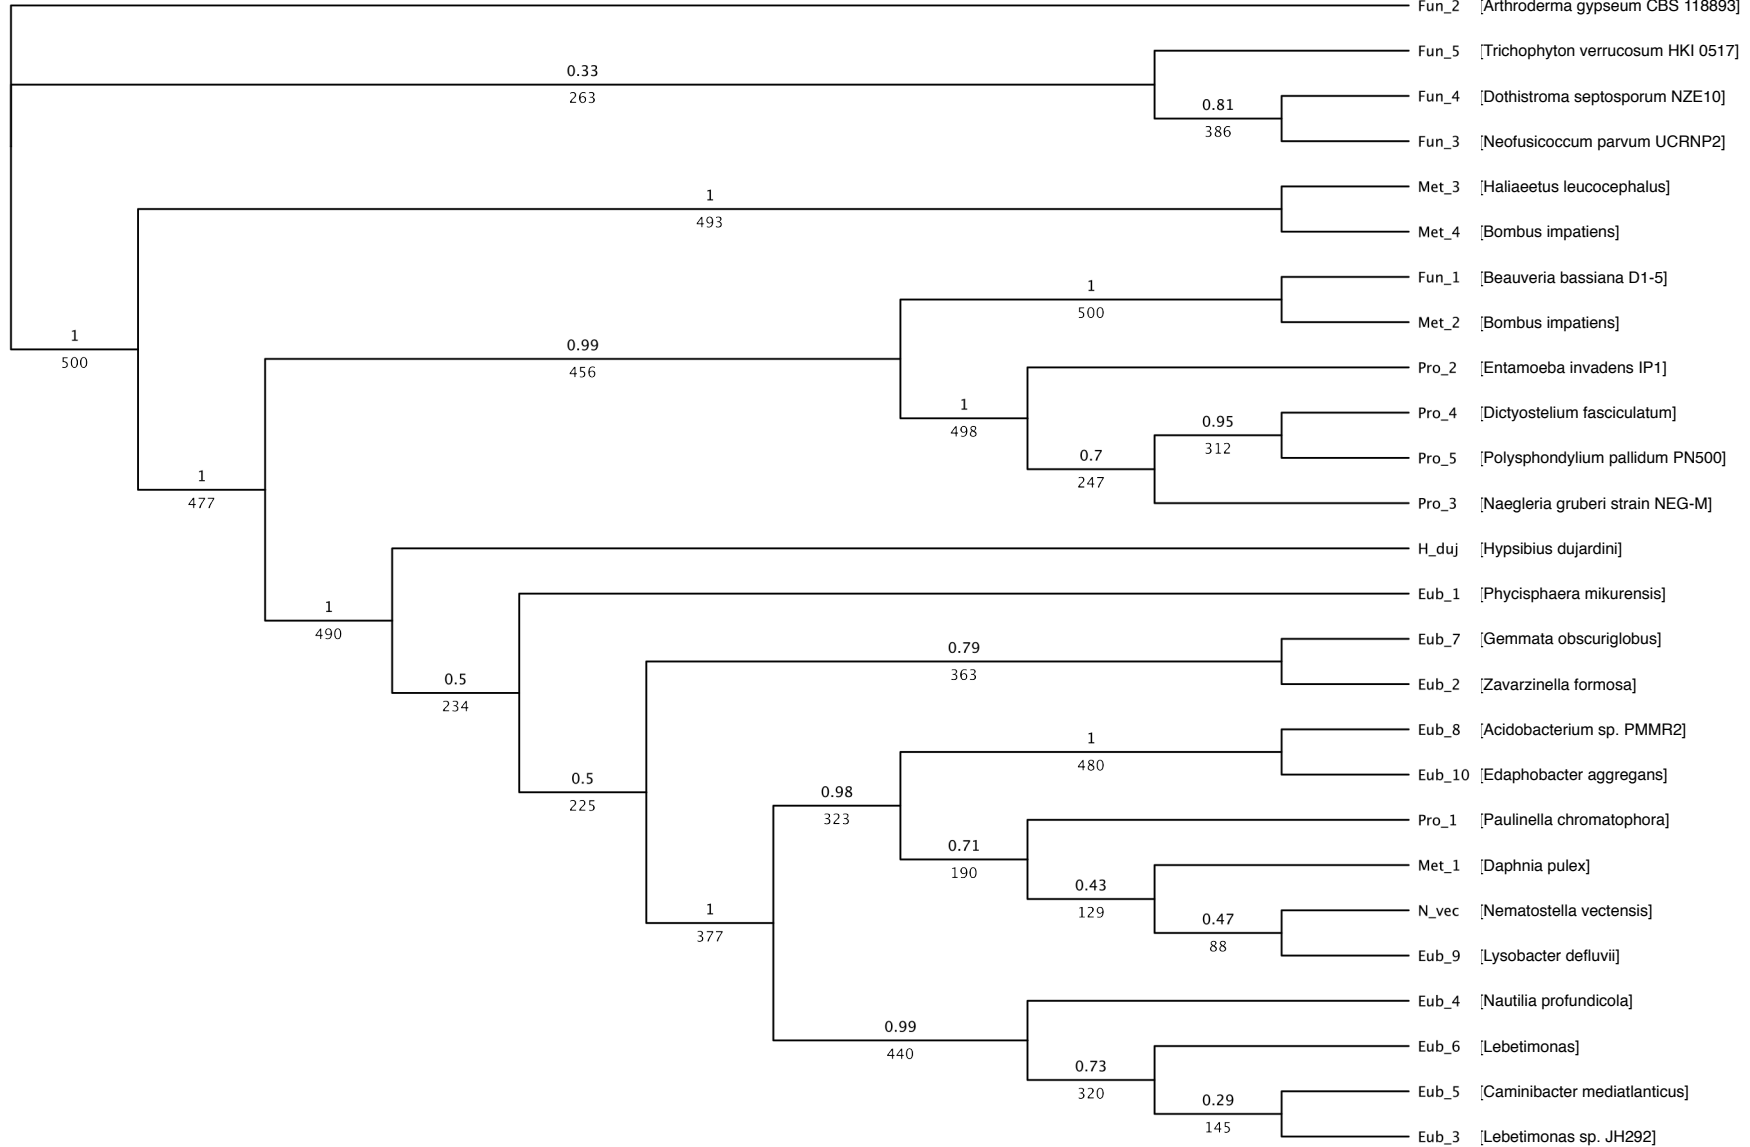

snap\_masked\_scaffold878\_size33947\_processed\_gene\_0.18

3-oxoacyl-ACP reductase

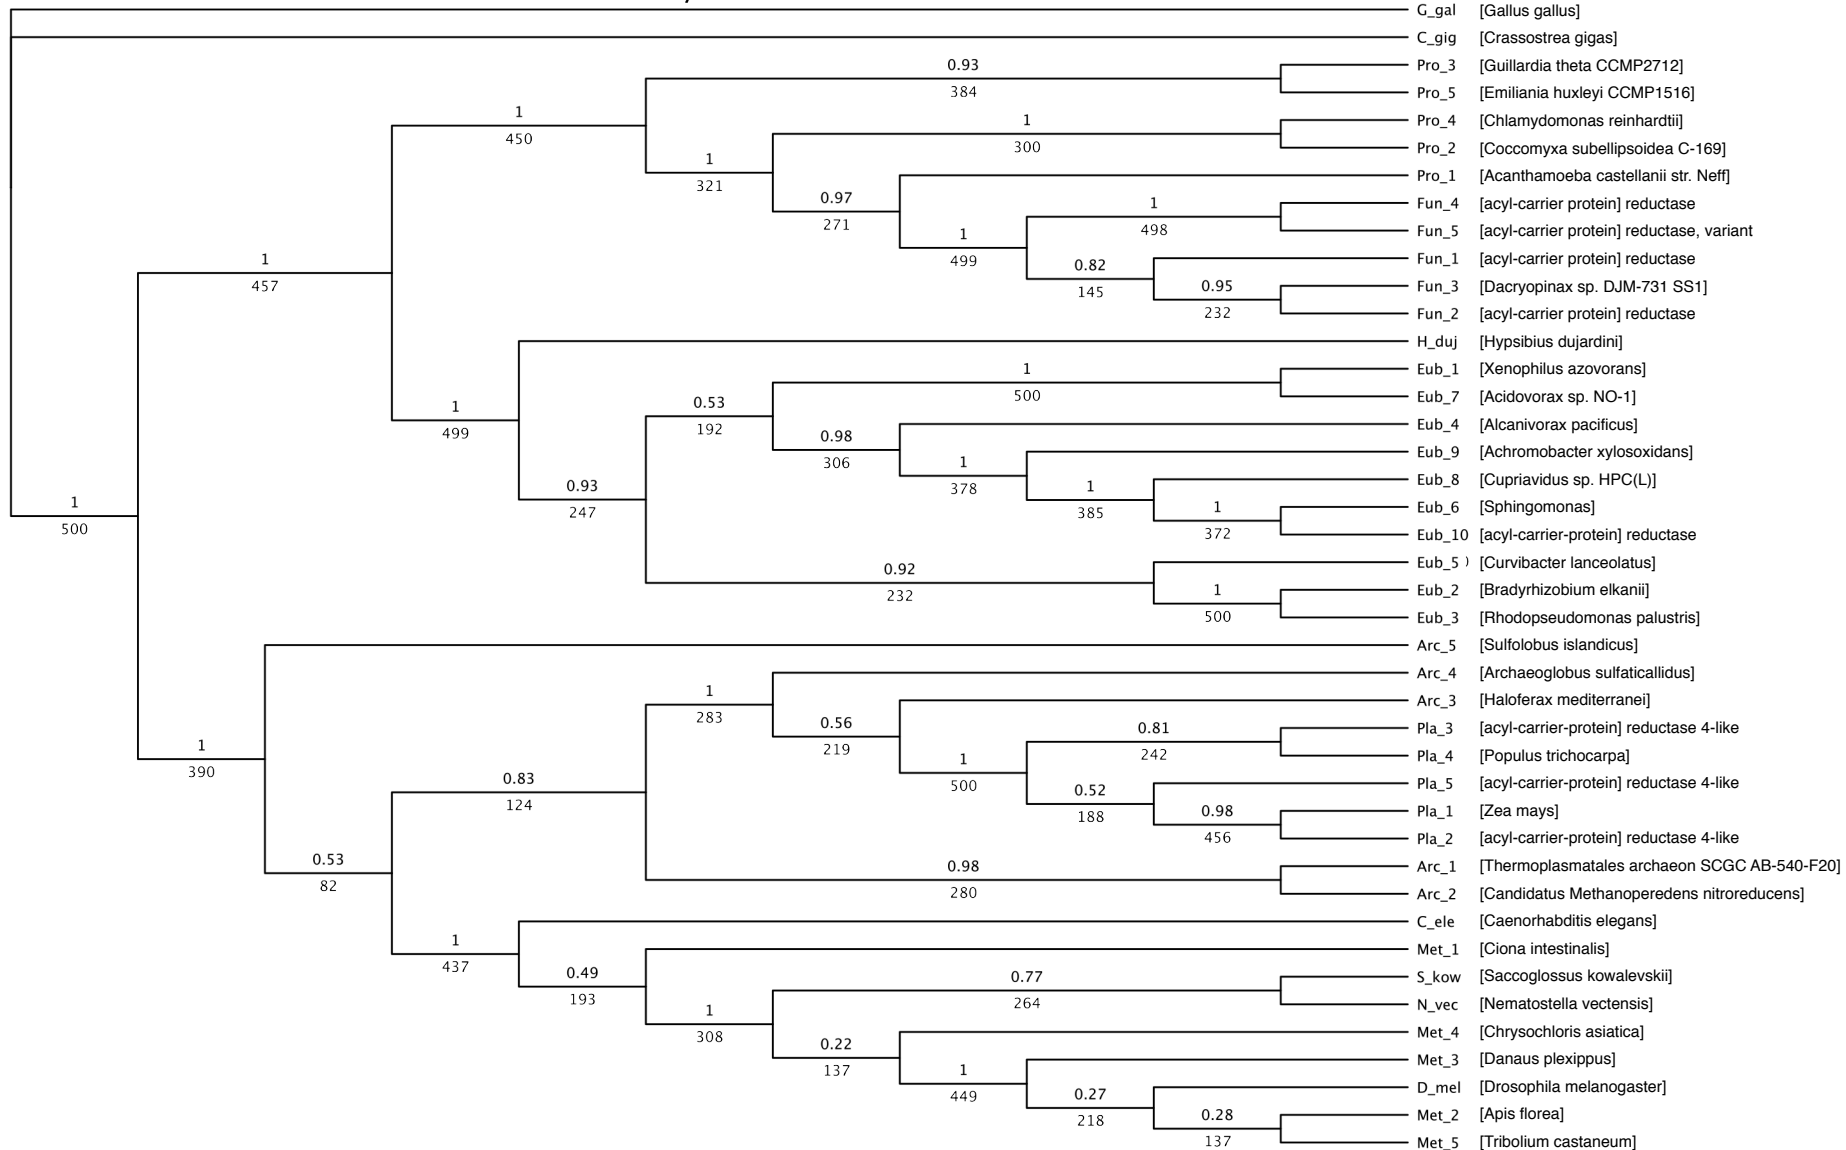

snap\_masked\_scaffold815\_size34909\_processed\_gene\_0.7

NmrA family protein

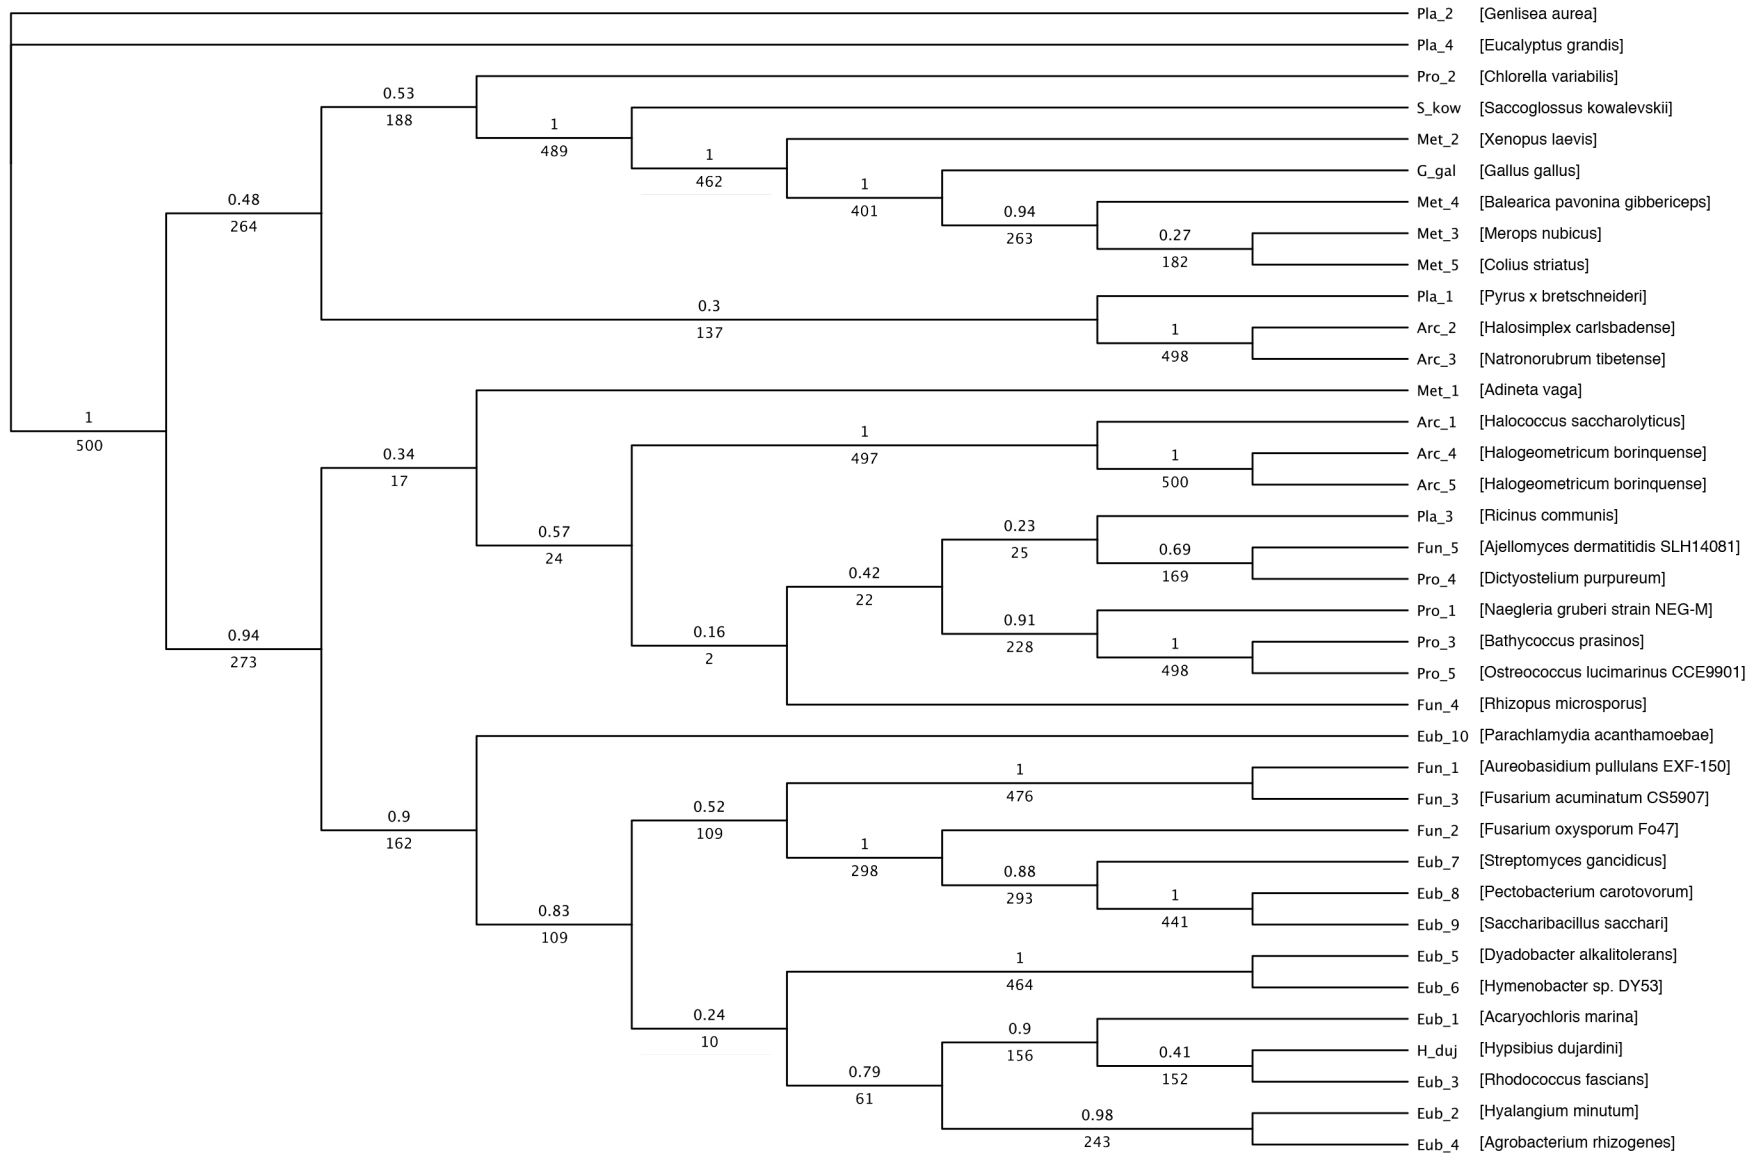

snap\_masked\_scaffold126\_size77140\_processed\_gene\_0.47  
glucose-6-phosphate 1-dehydrogenase

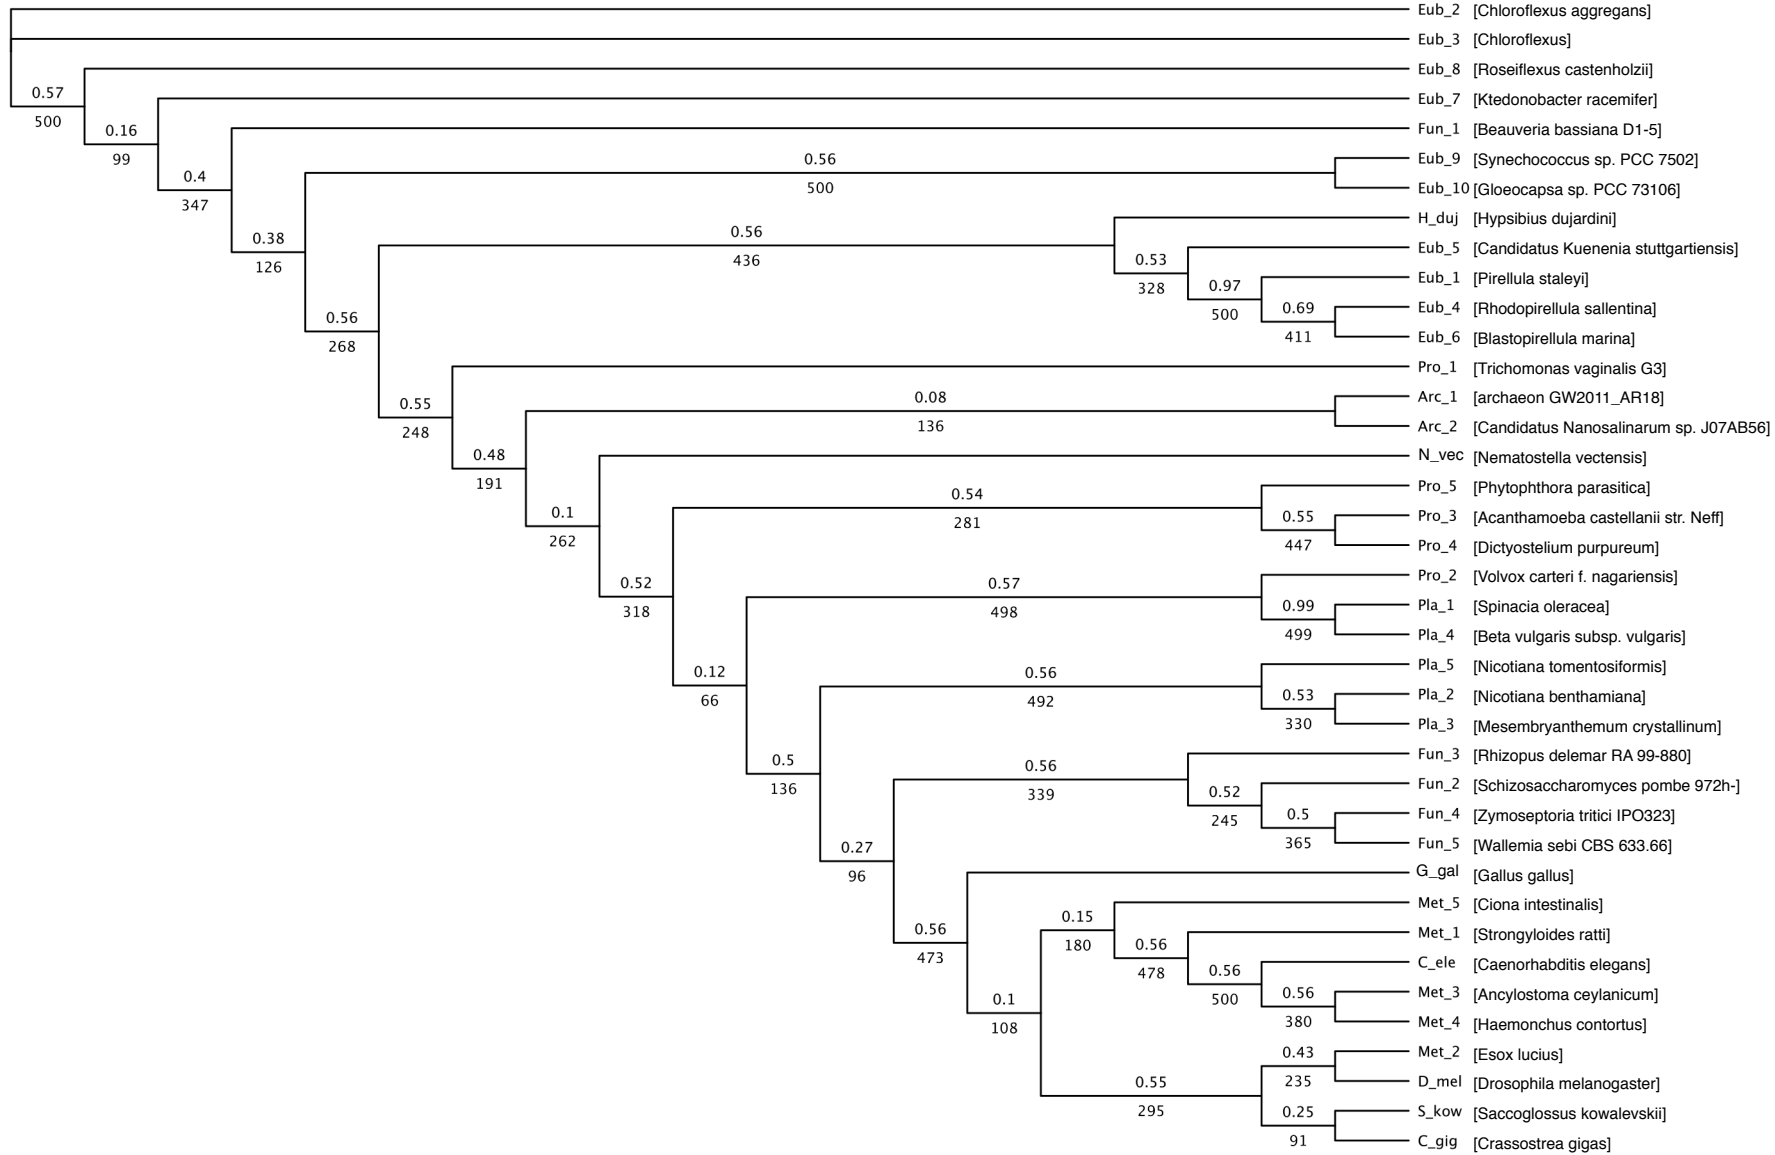

snap\_masked\_scaffold23\_size182404\_processed\_gene\_0.32  
dihydroxy-acid dehydratase

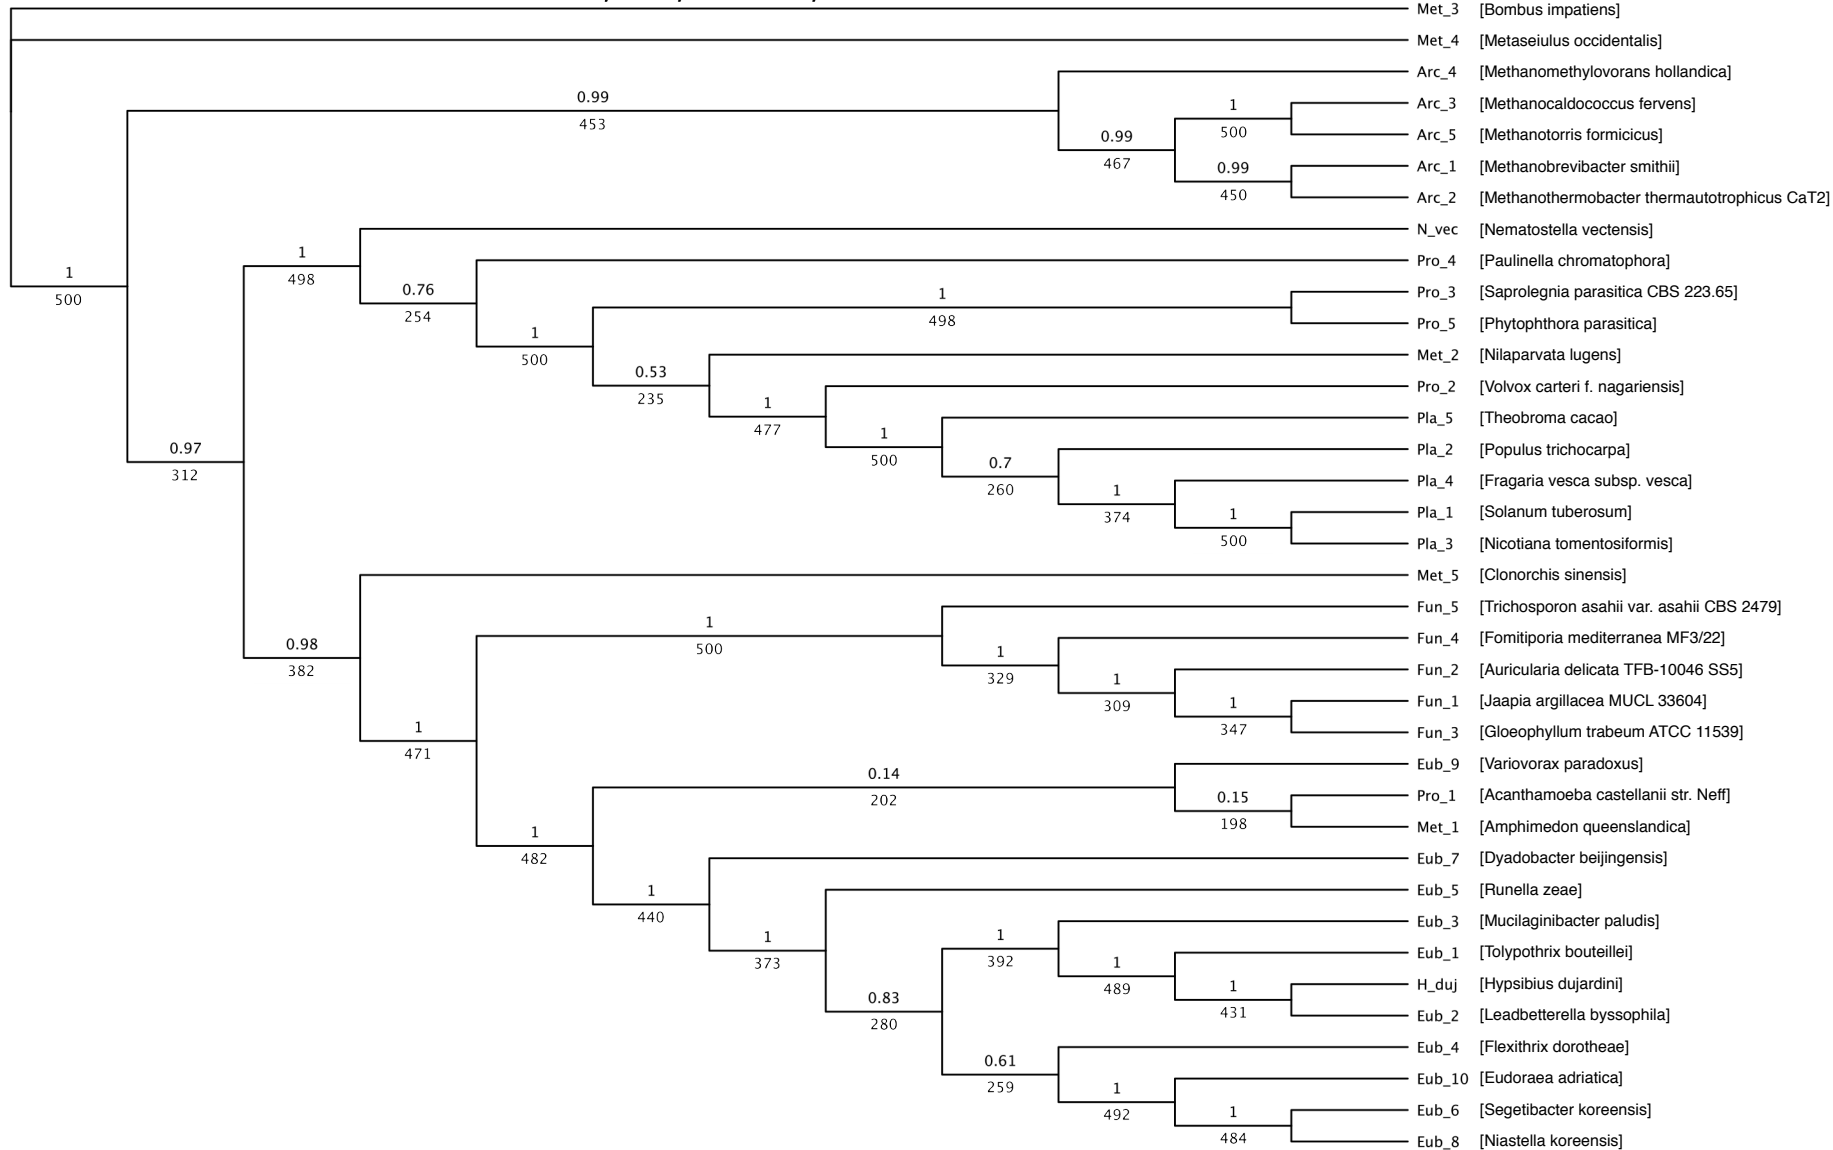

snap\_masked\_scaffold10\_size447749\_processed\_gene\_3.47

endo-1,4-beta-xylanase

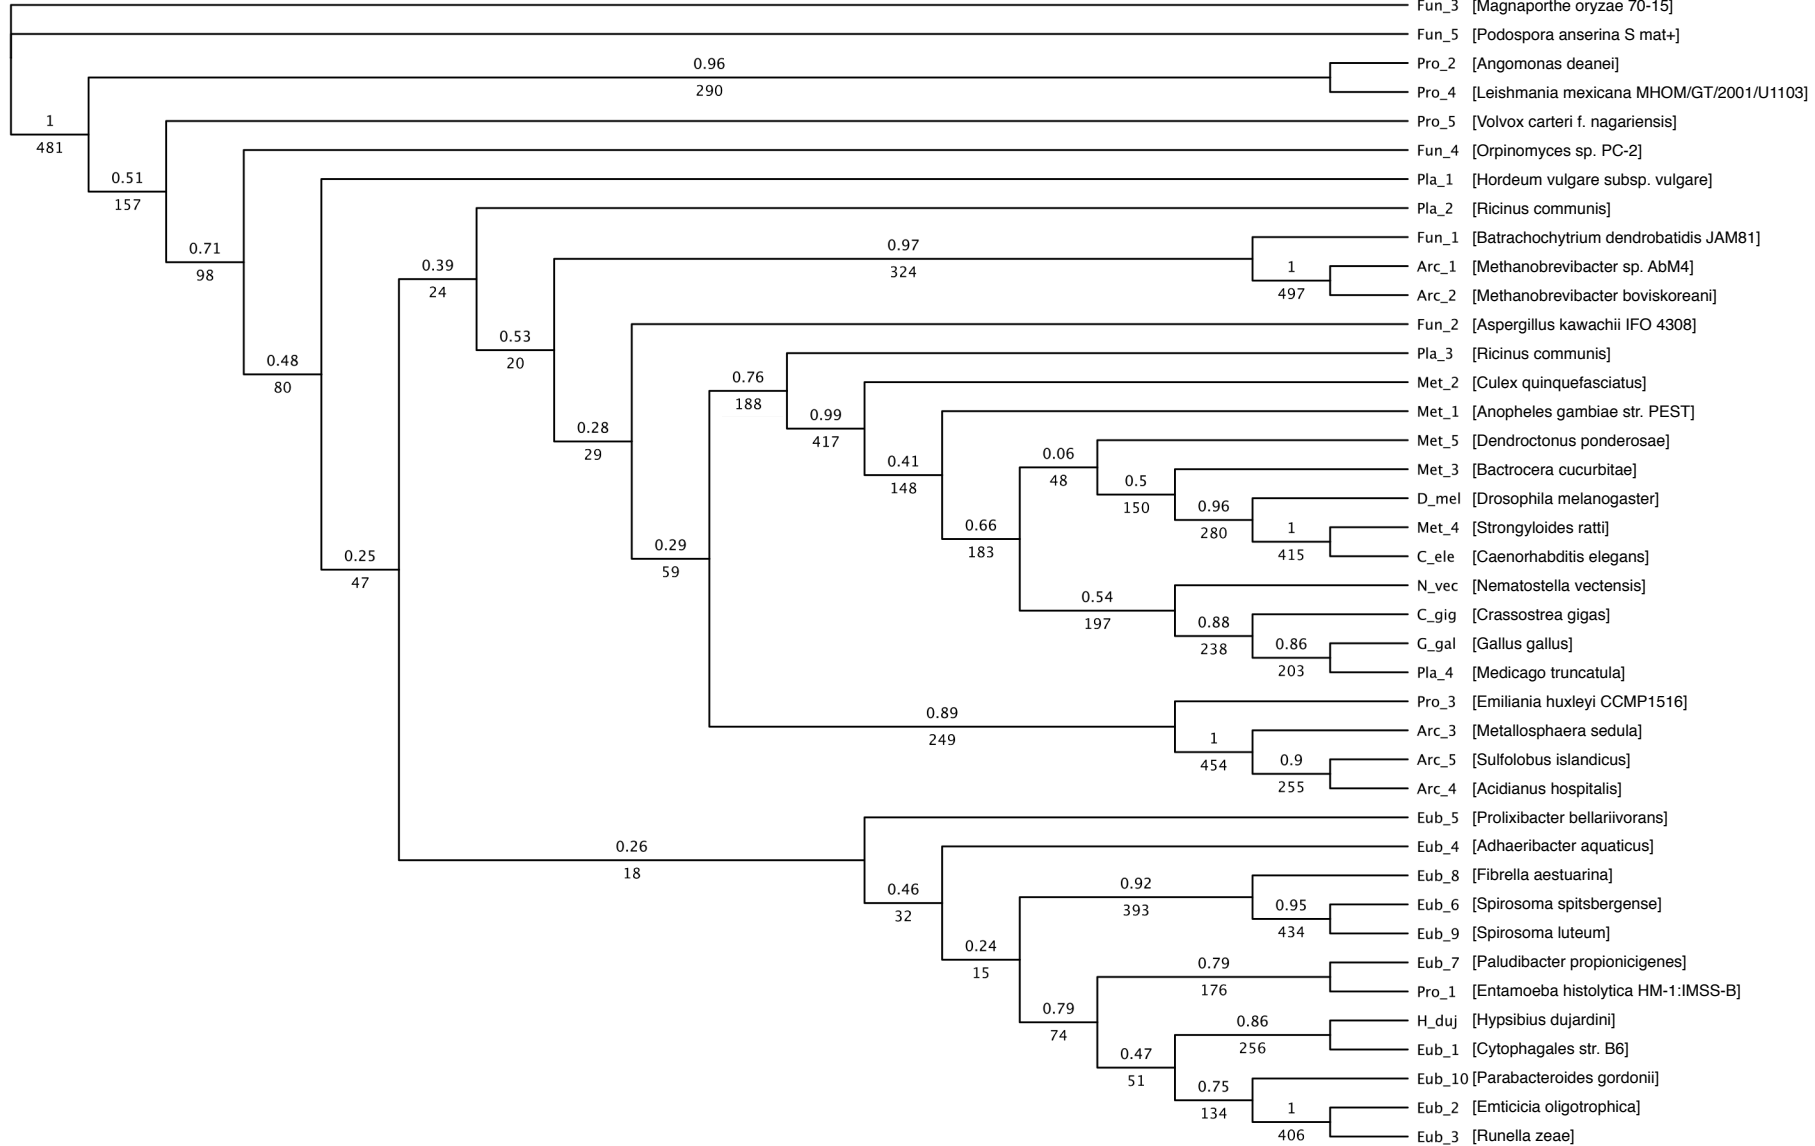



snap\_masked\_scaffold10\_size447749\_processed\_gene\_1.21  
hypothetical protein

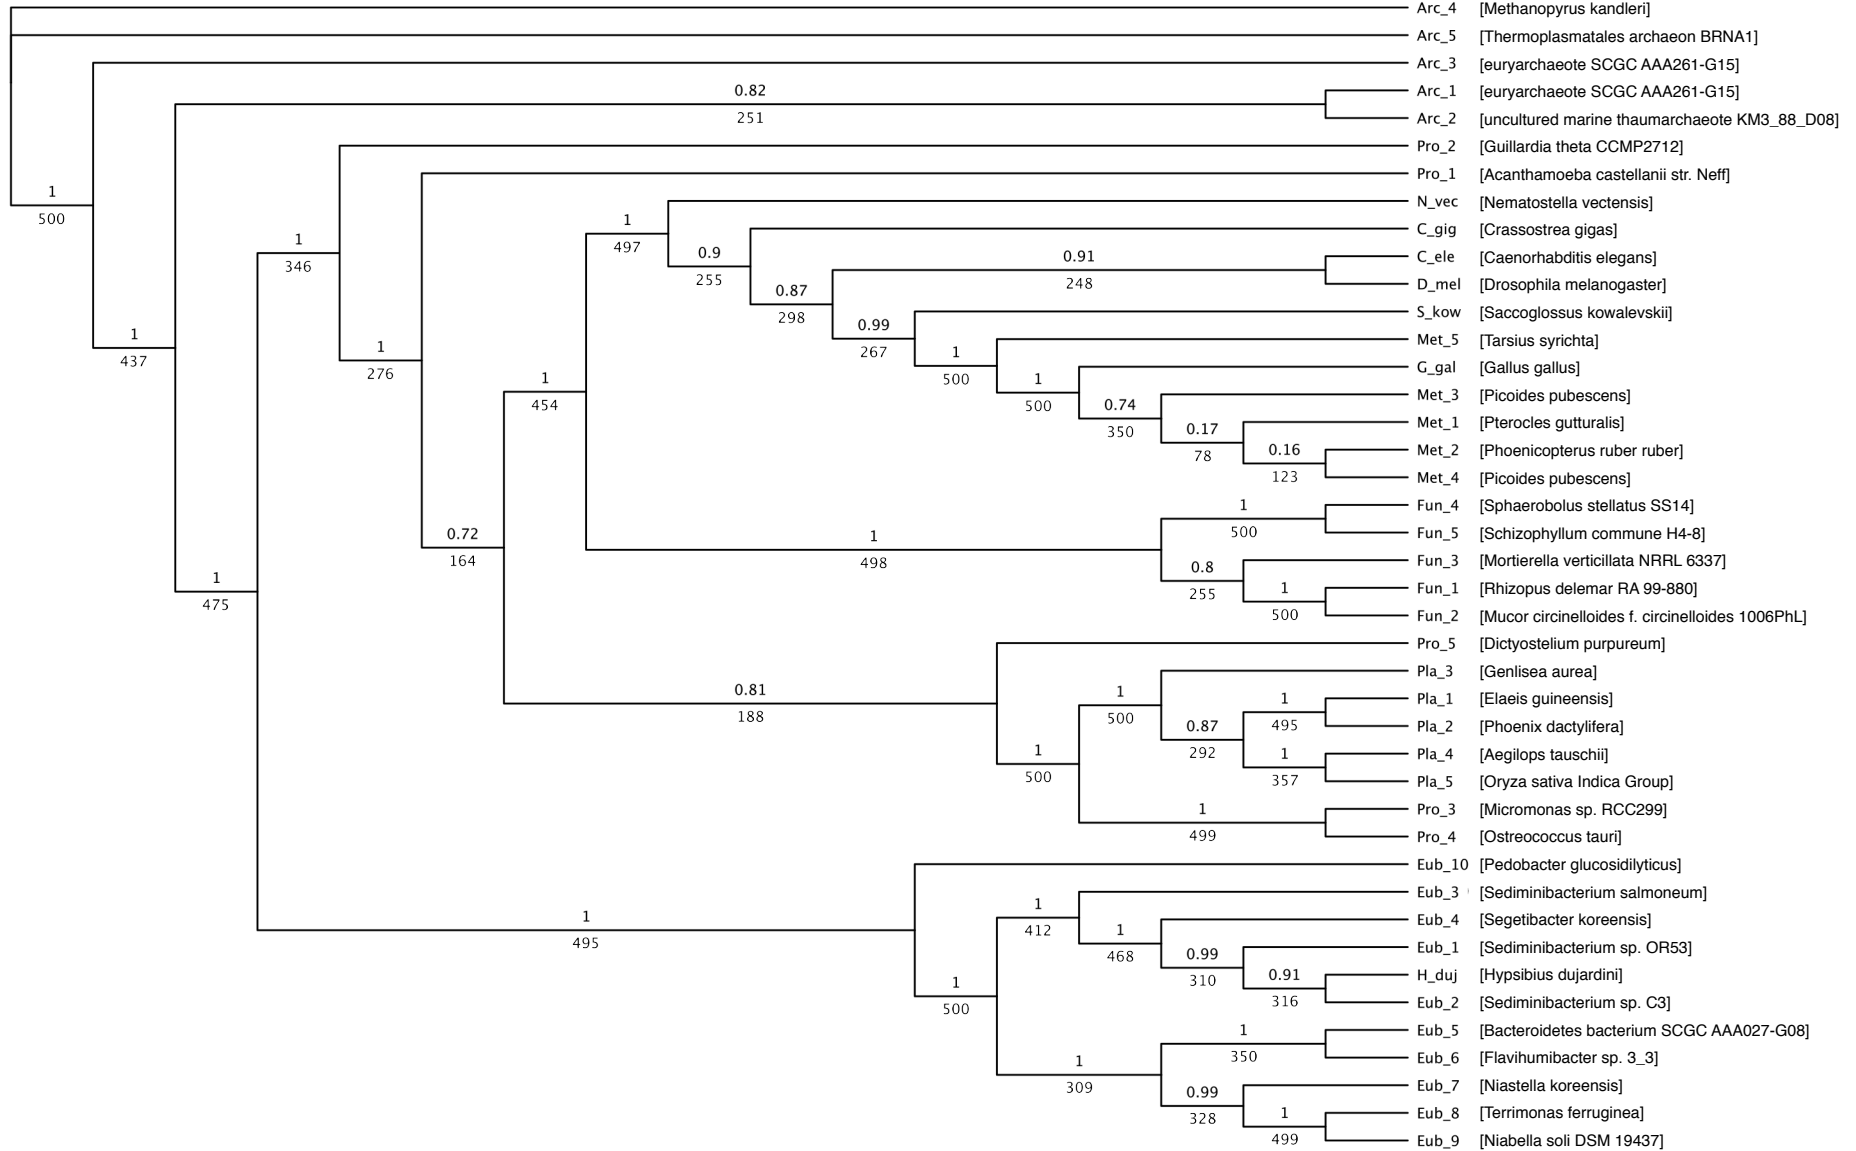

snap\_masked\_scaffold3\_size1208507\_processed\_gene\_1.67

flagellar P-ring protein

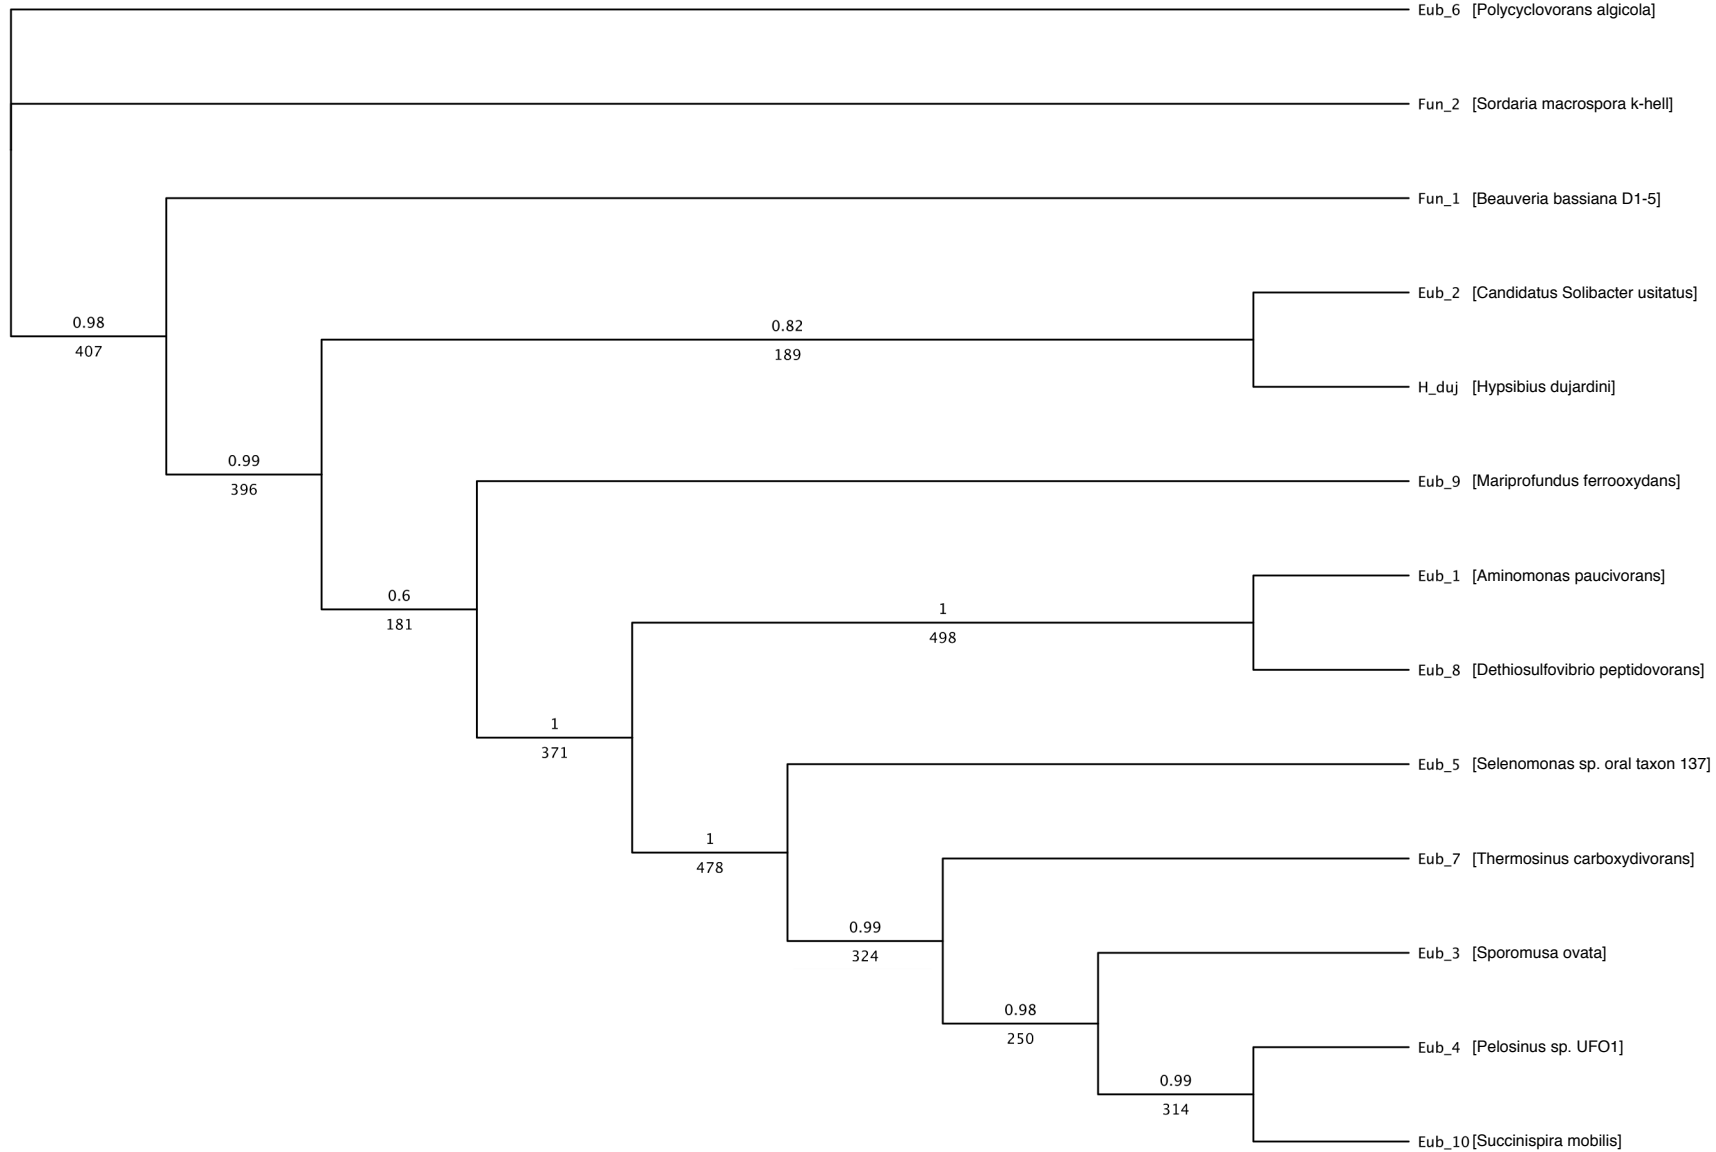

maker-scaffold16610\_size5253-snap-gene-0.7

hypothetical protein

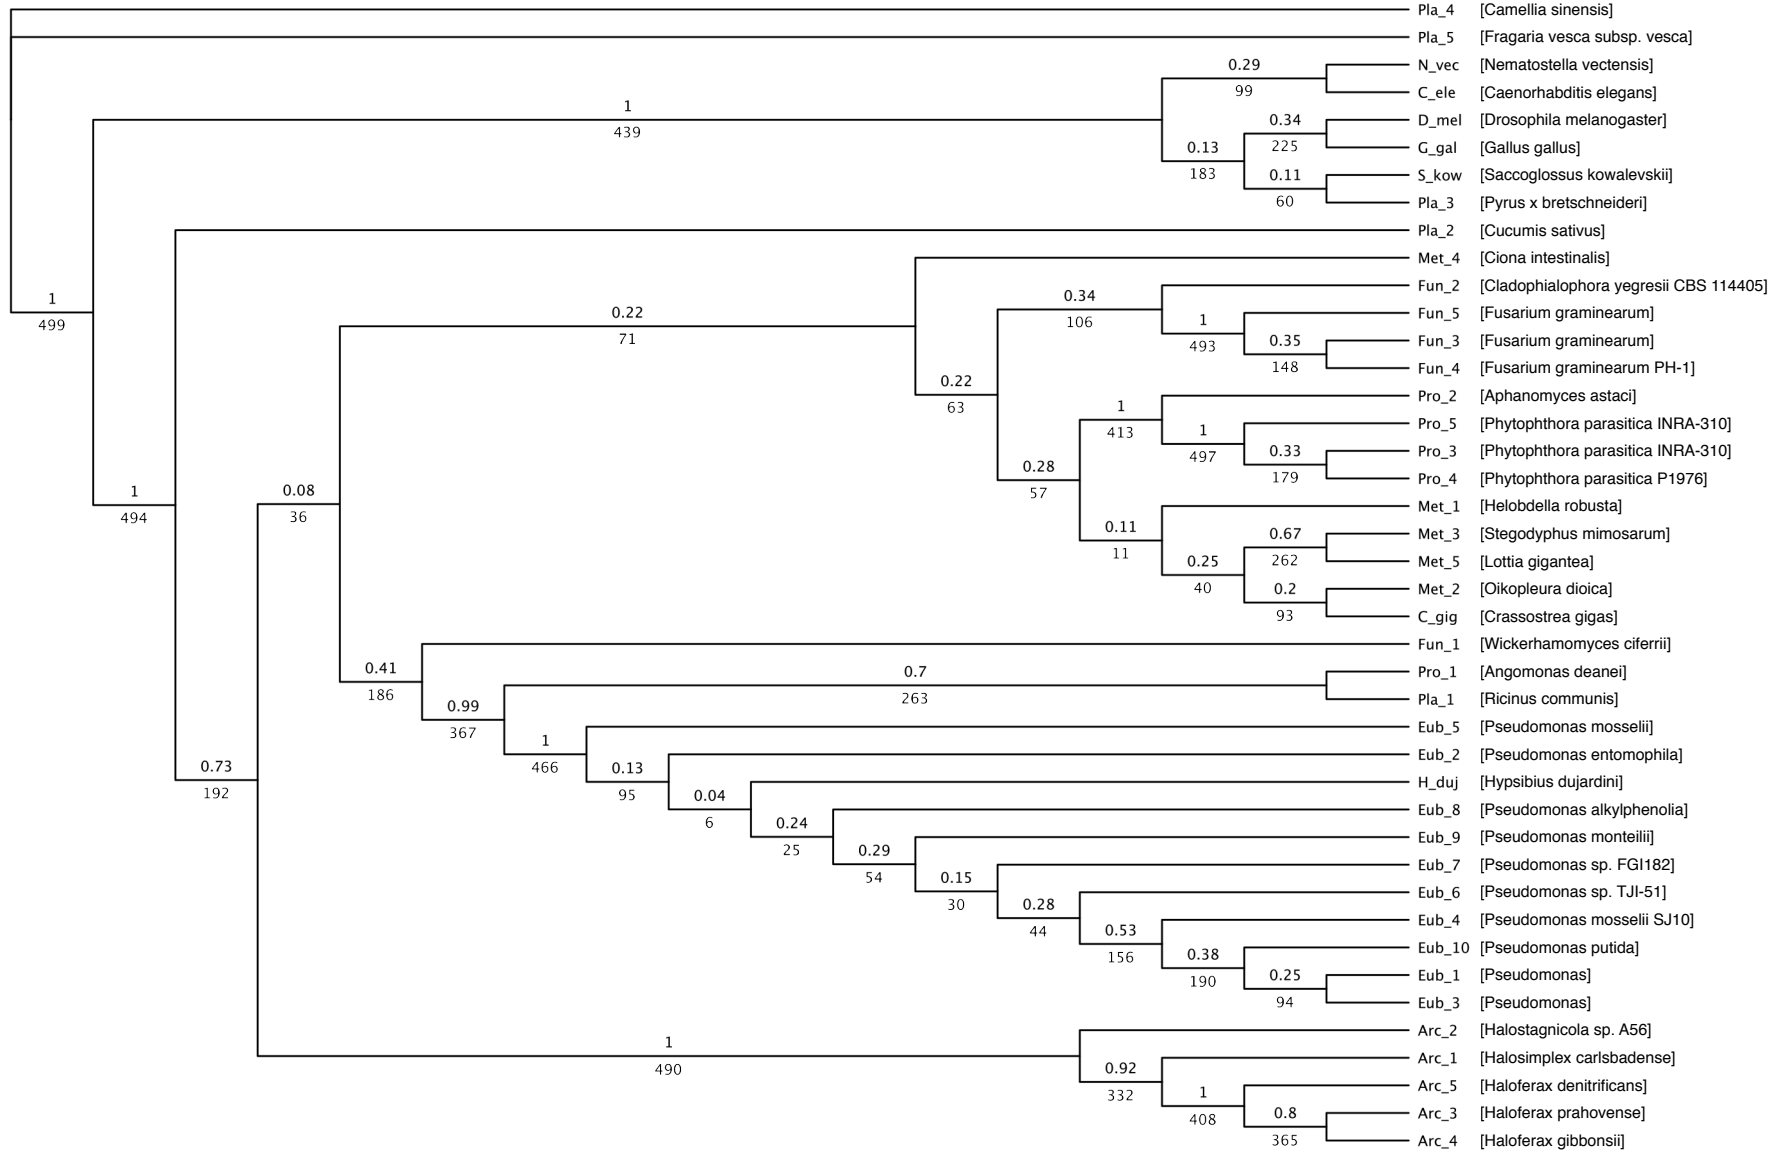

maker-scaffold5875\_size12964-augustus-gene-0.12  
glycoside hydrolase family 3 protein

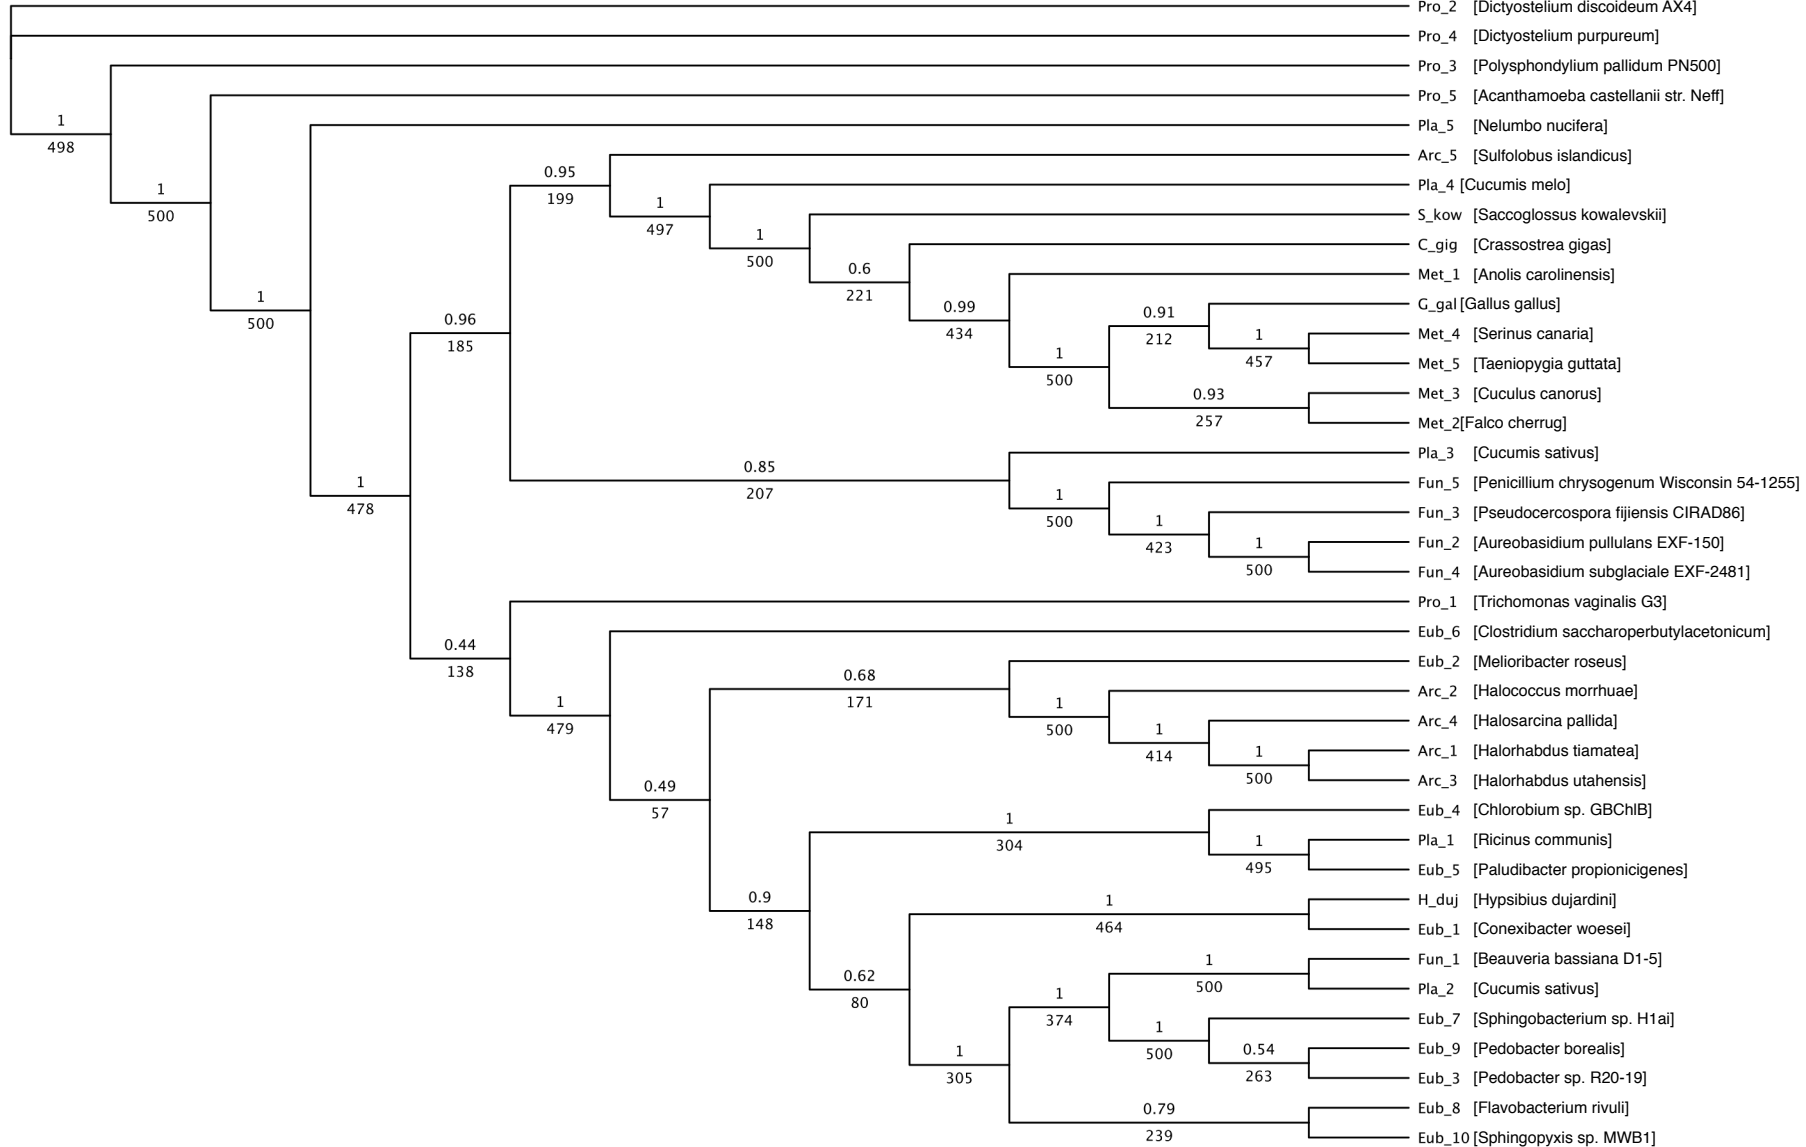

maker\_scaffold23270\_size2748\_snap\_gene\_0.5  
sulfate ABC transporter ATP-binding protein

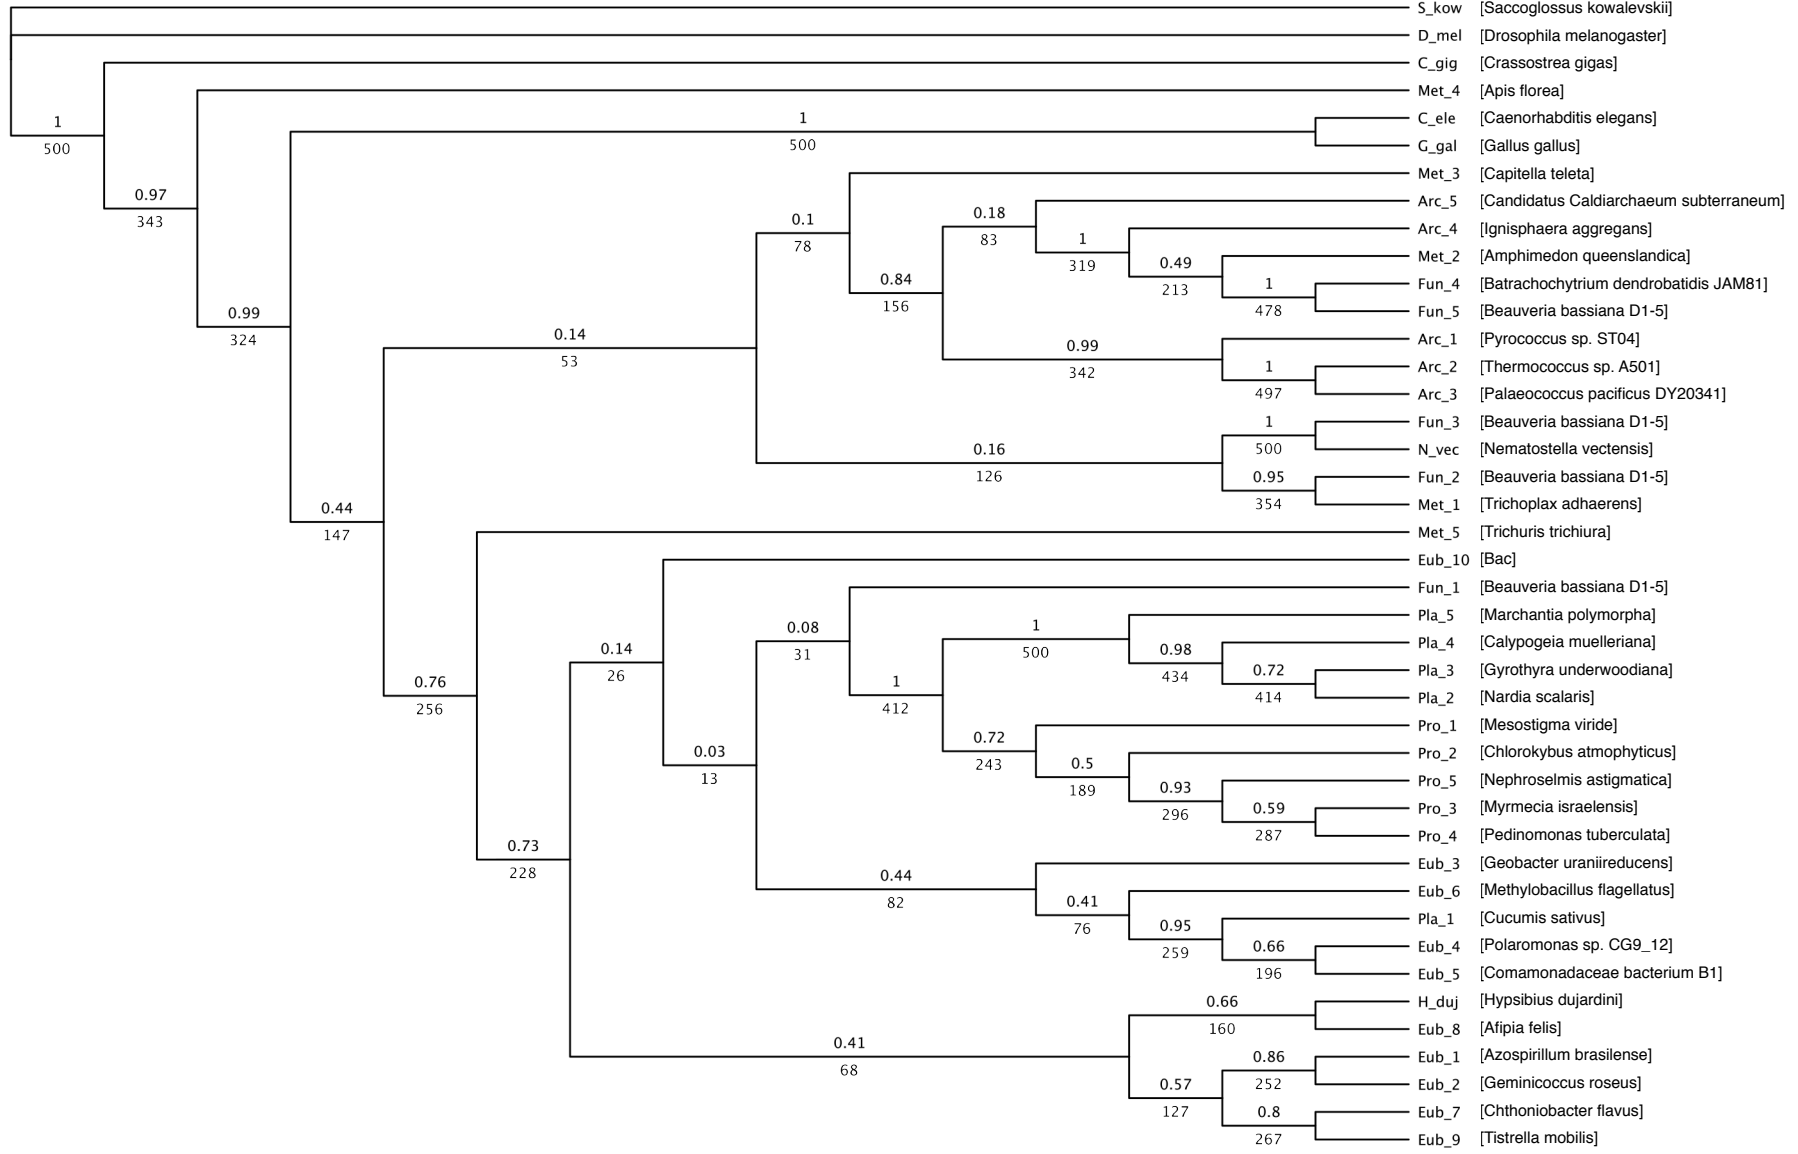

hydroxyethylthiazole kinase

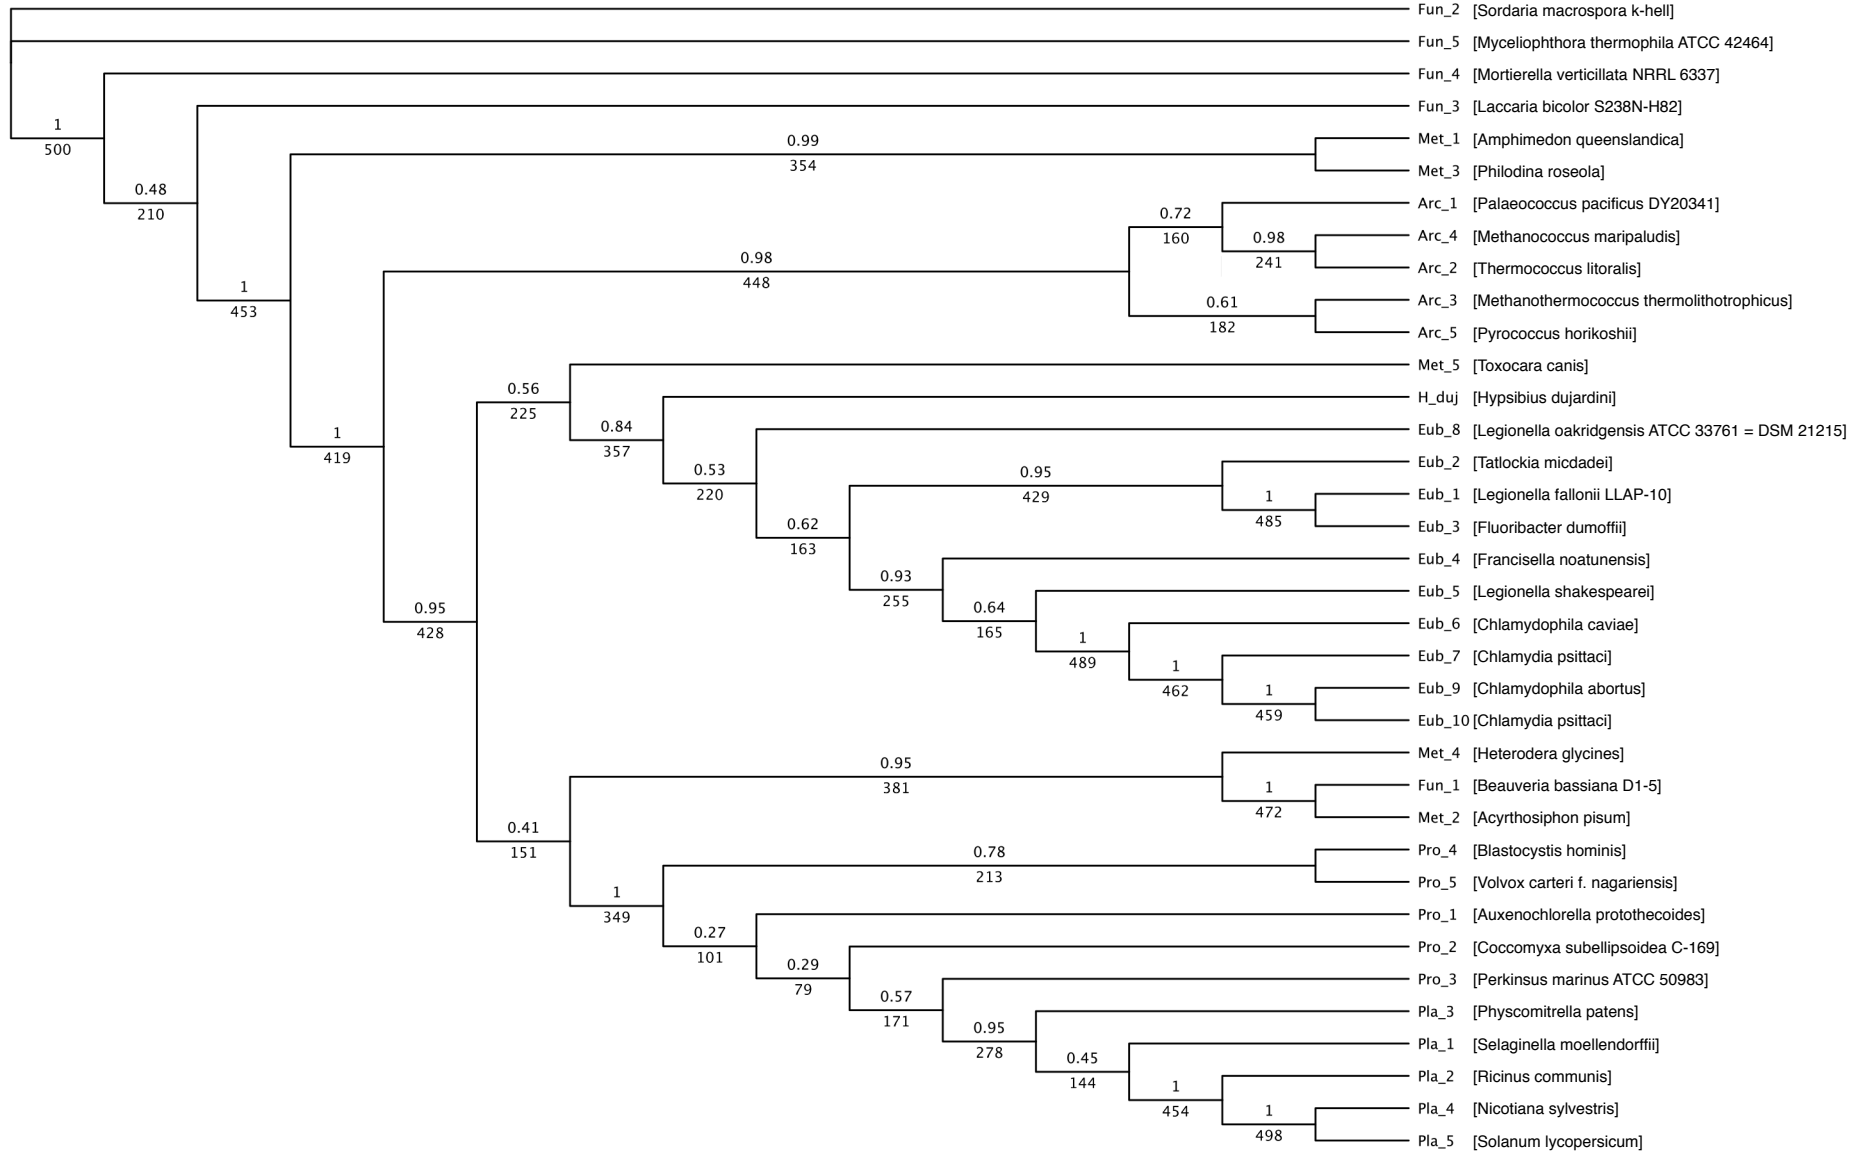

maker\_scaffold13328\_size7081\_snap\_gene\_0.6

predicted protein

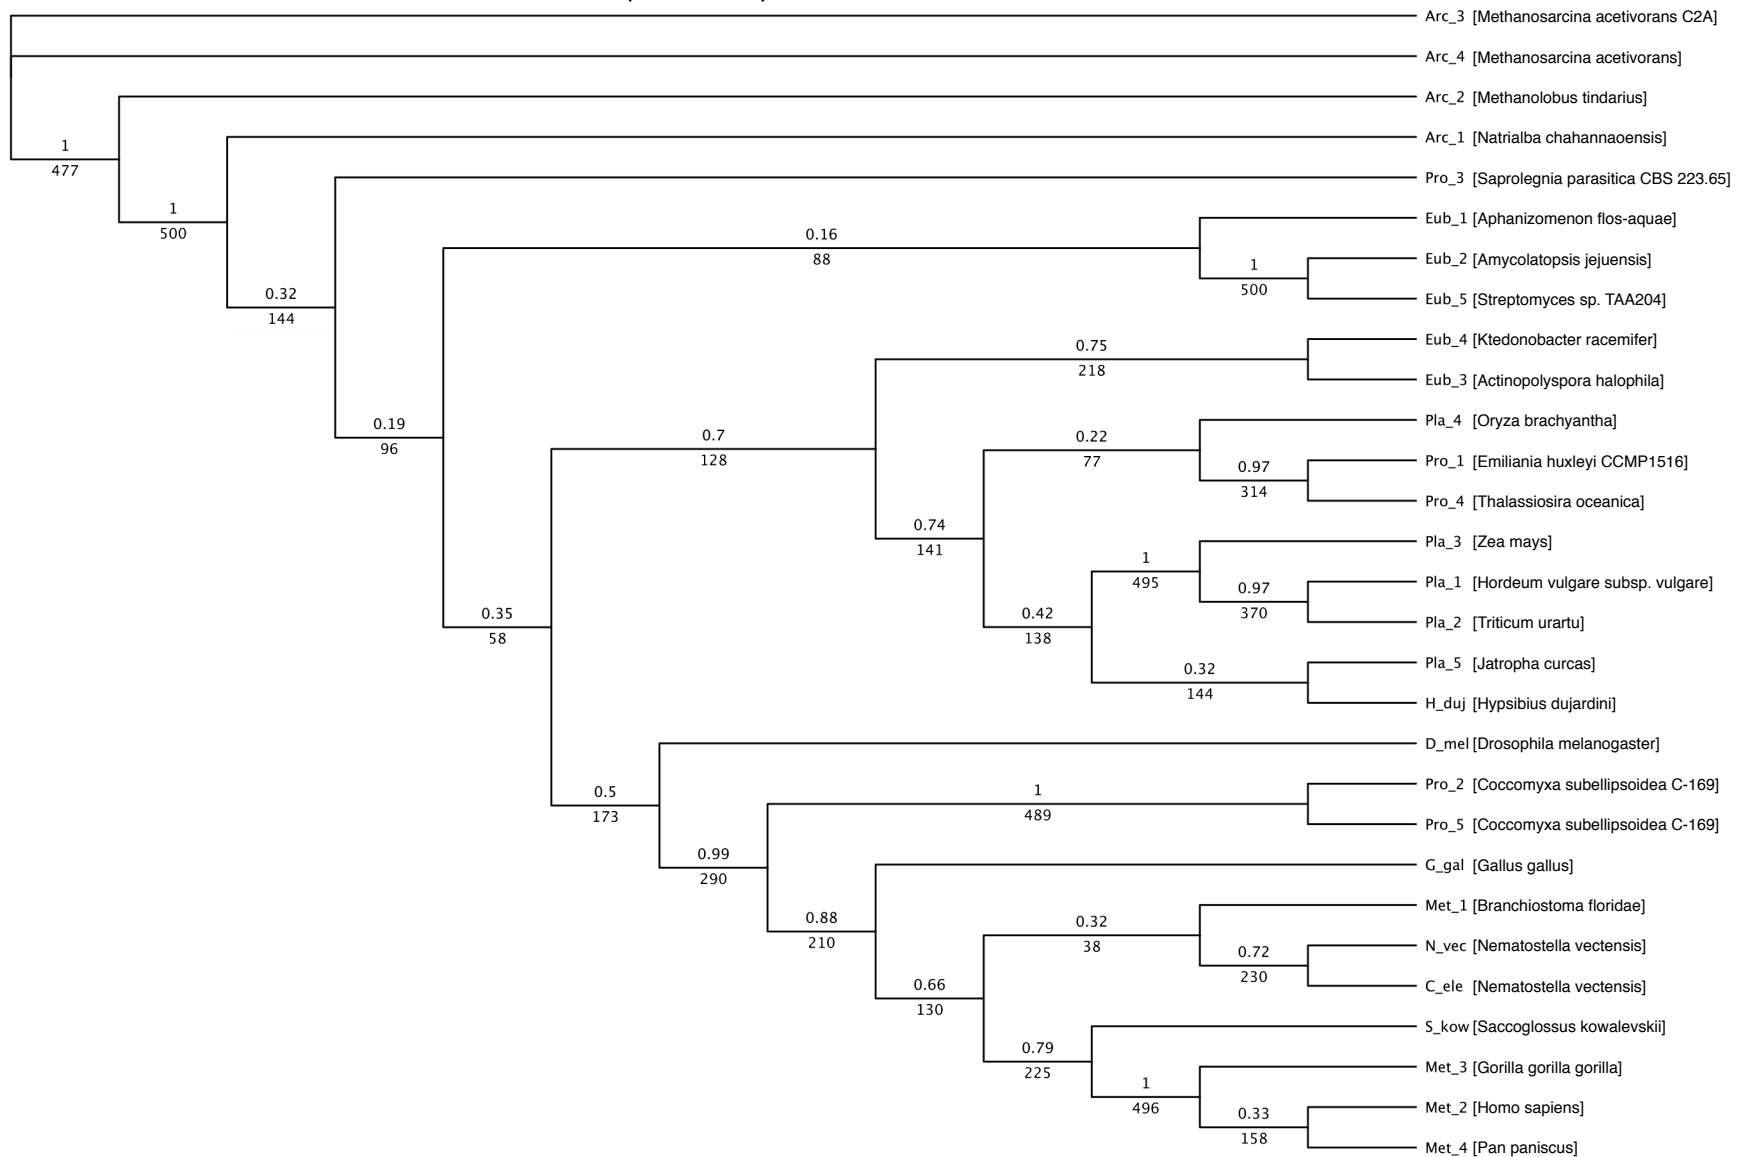

maker\_scaffold12736\_size7442\_augustus\_gene\_0.15

nitrate ABC transporter ATP-binding protein

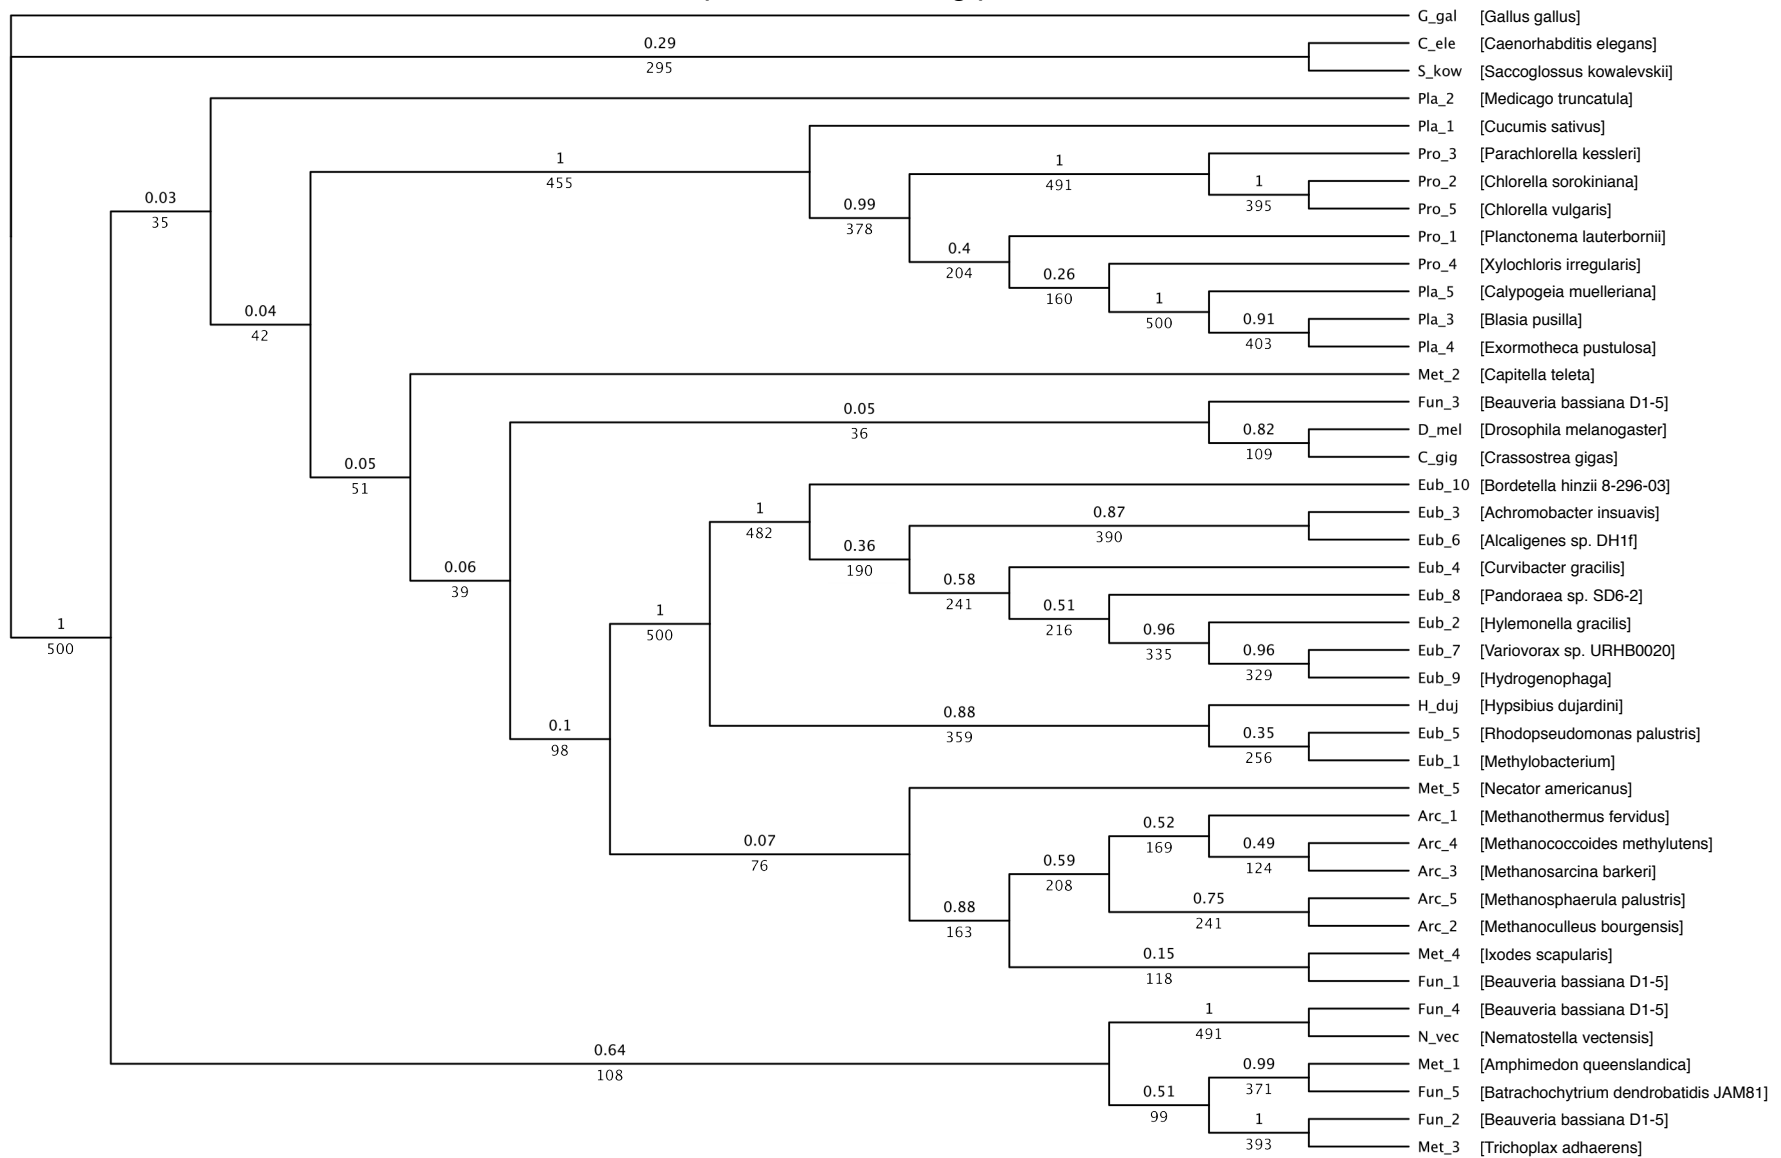



maker\_scaffold10072\_size9001\_snap\_gene\_0.11  
hypothetical protein

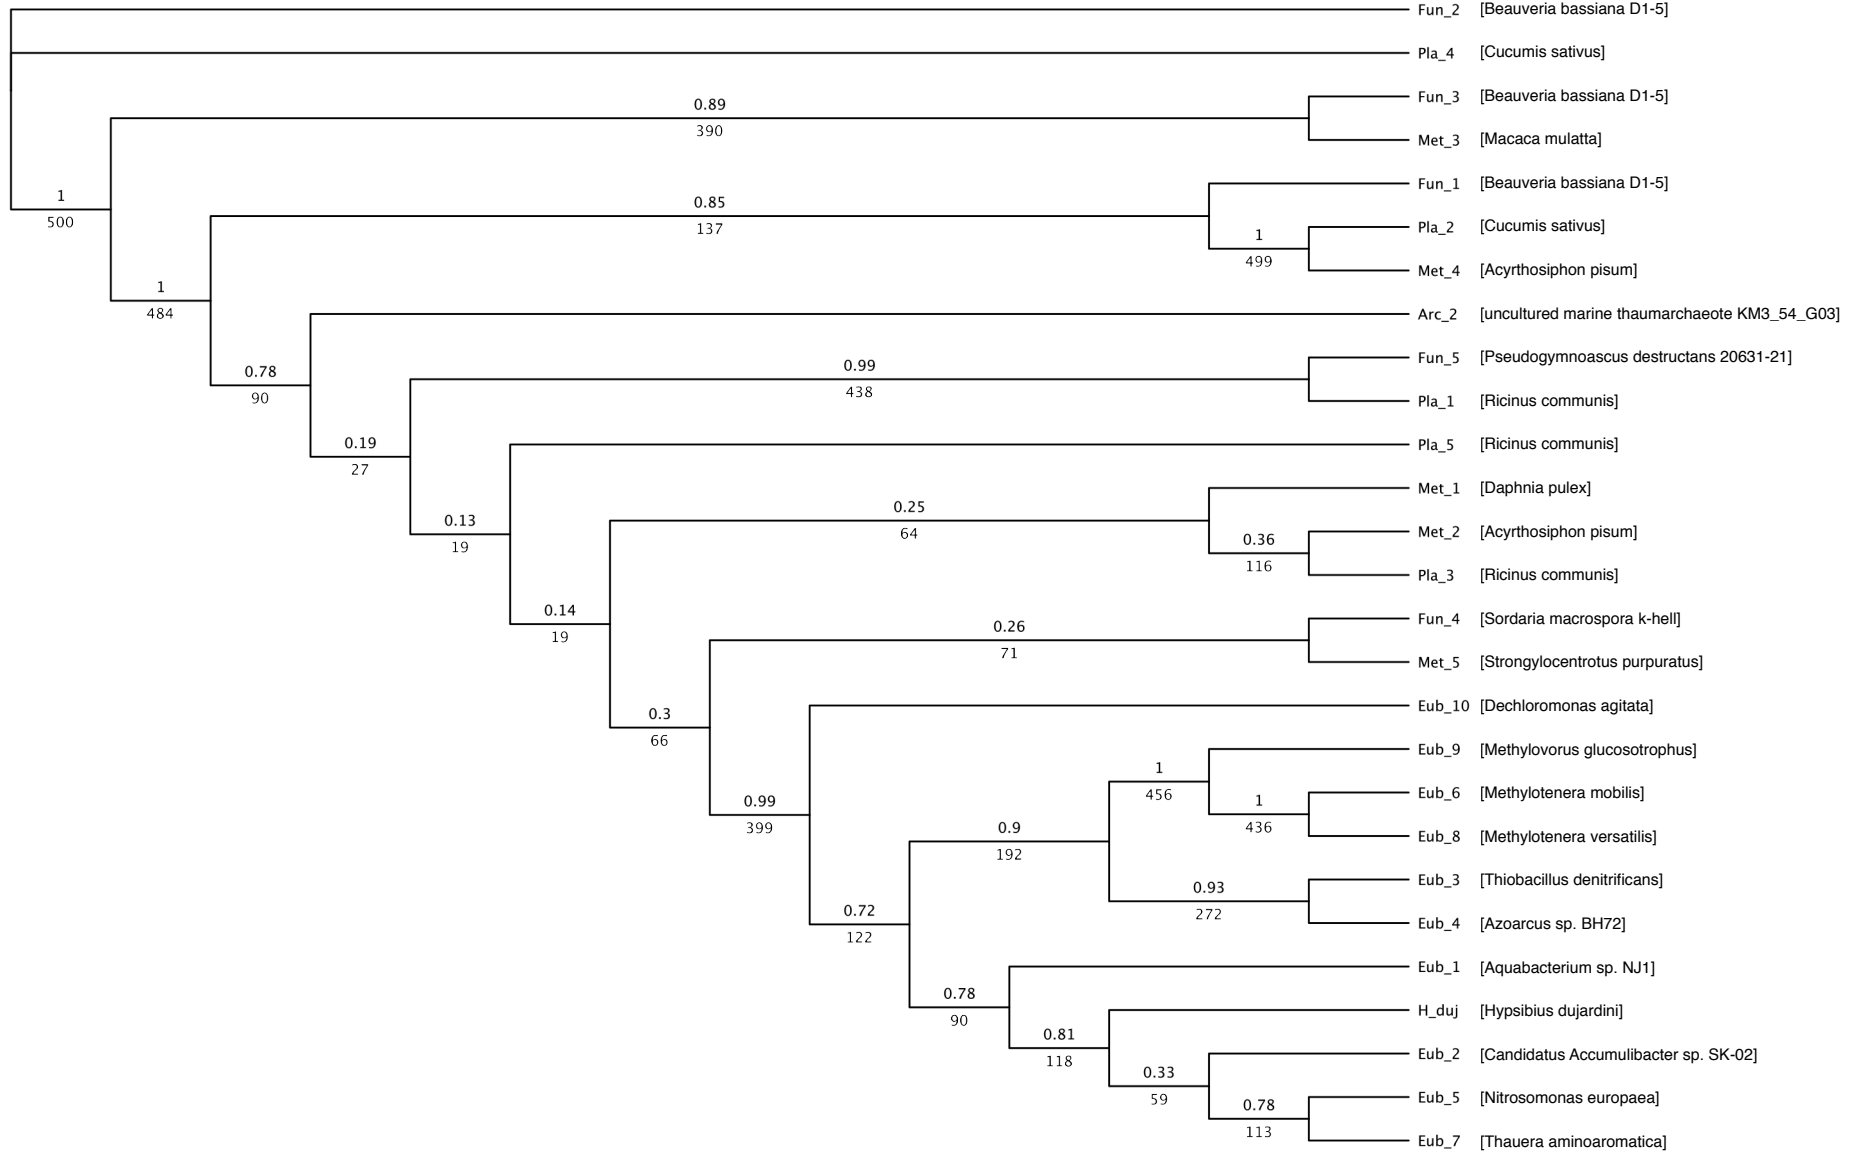

HrcA family transcriptional regulator

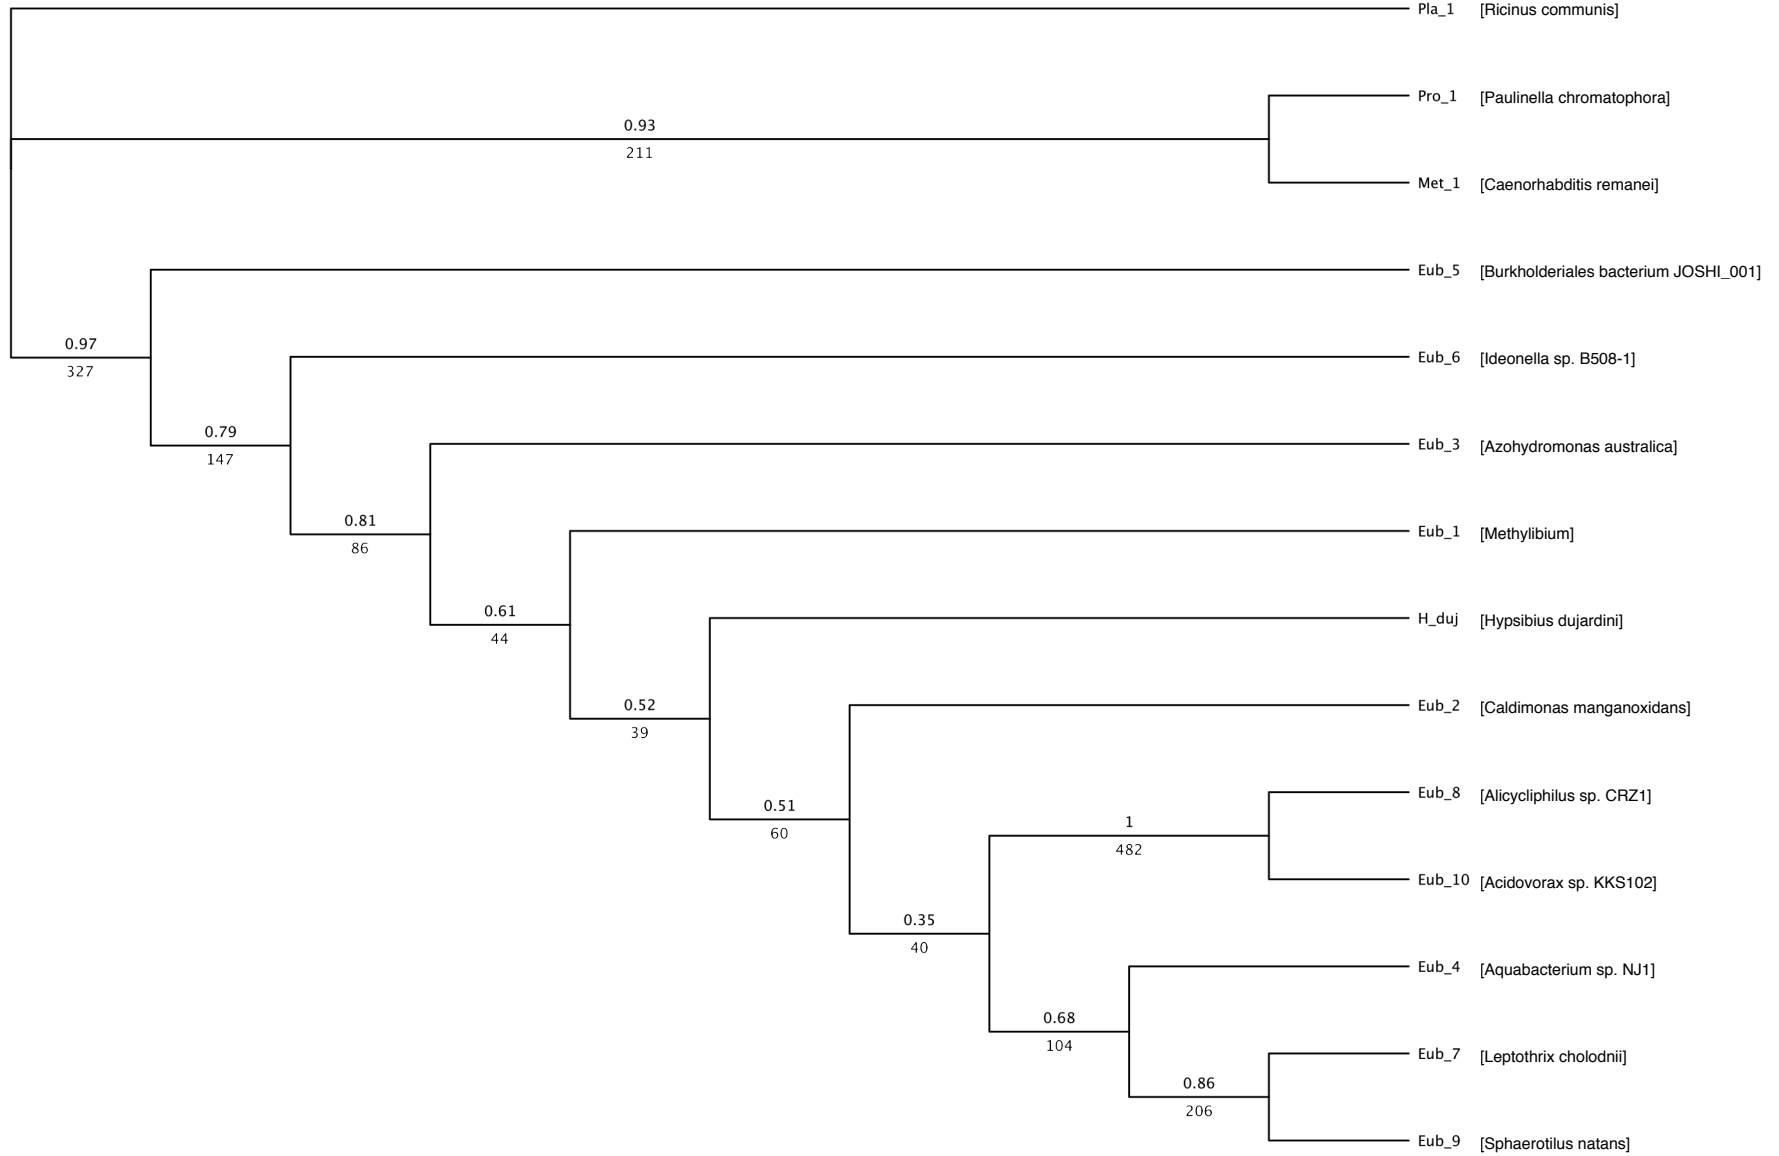

maker\_scaffold7284\_snap\_gene\_0.10  
hypothetical protein

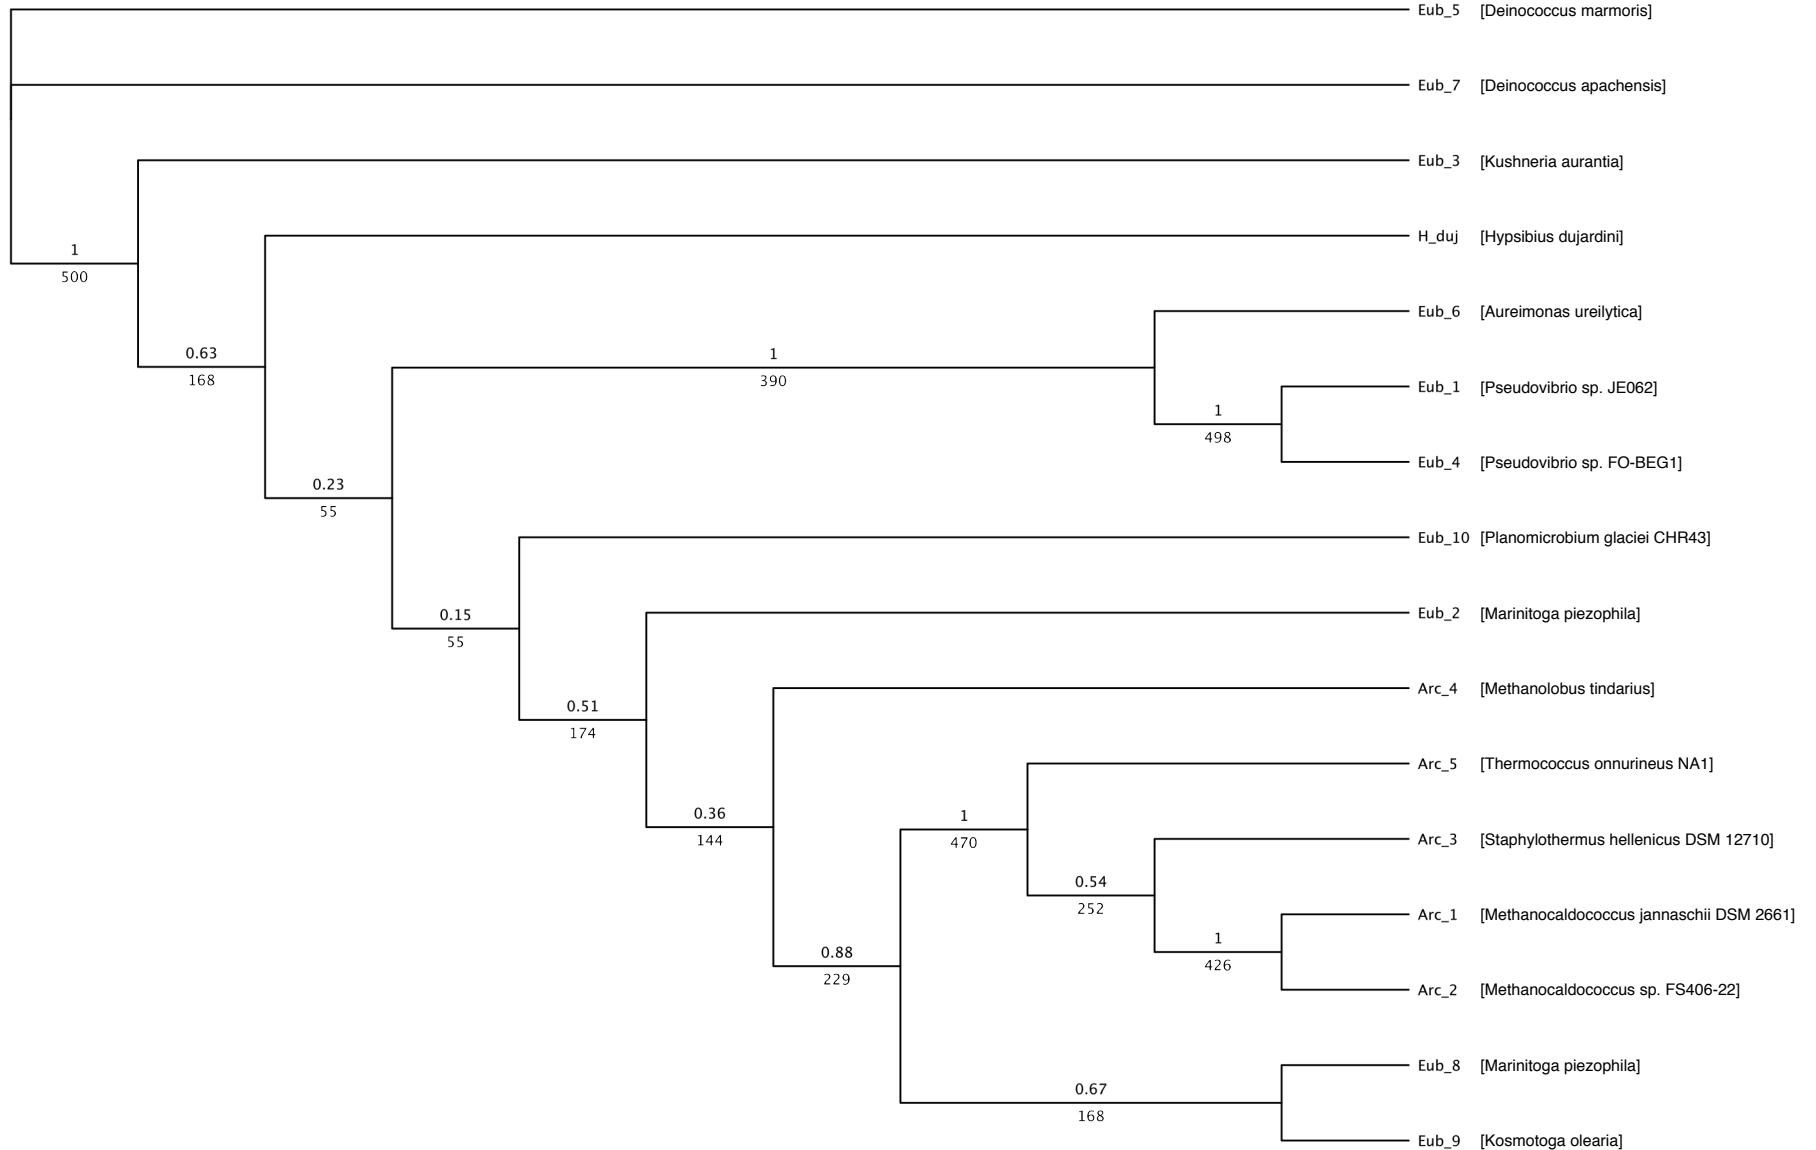

maker\_scaffold6957\_snap\_gene\_0.14  
hypothetical protein

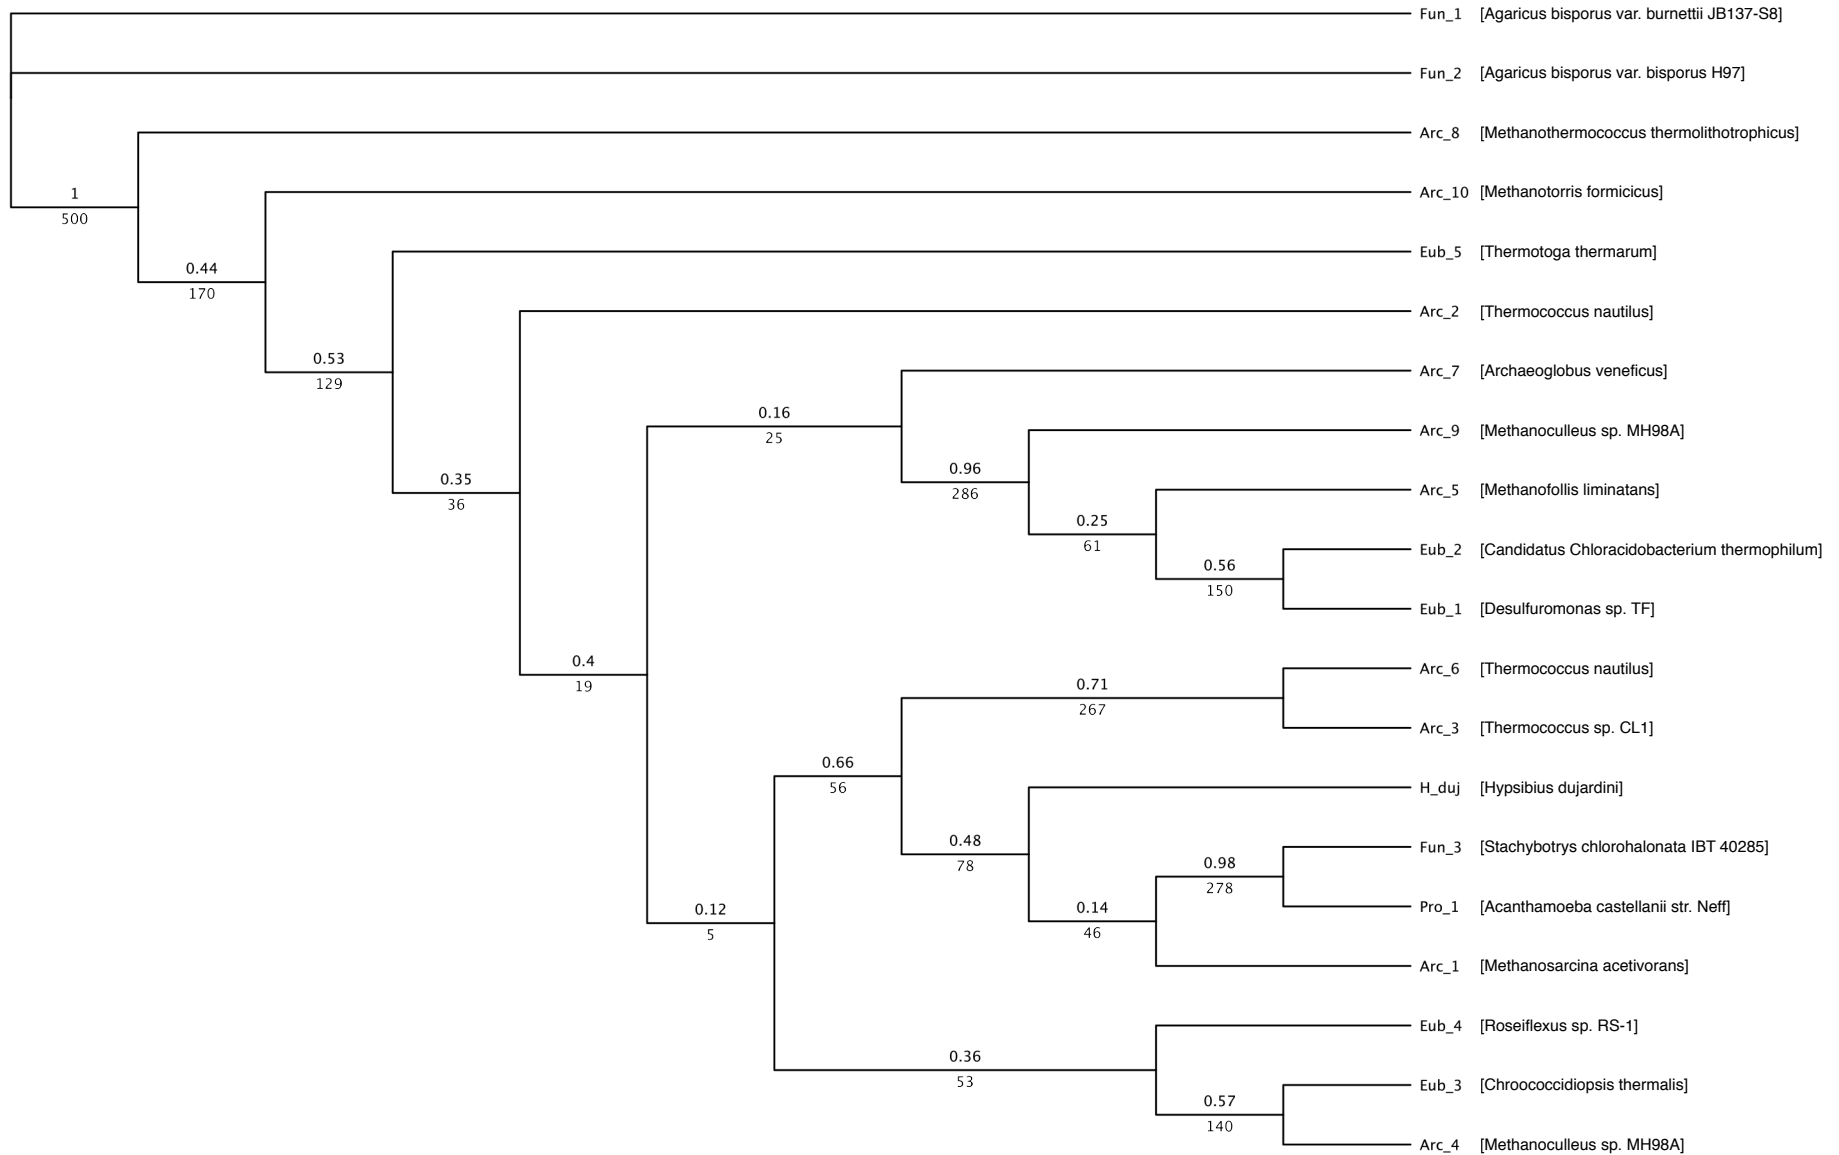

maker\_scaffold6668\_size11878\_snap\_gene\_0.12

hypothetical protein

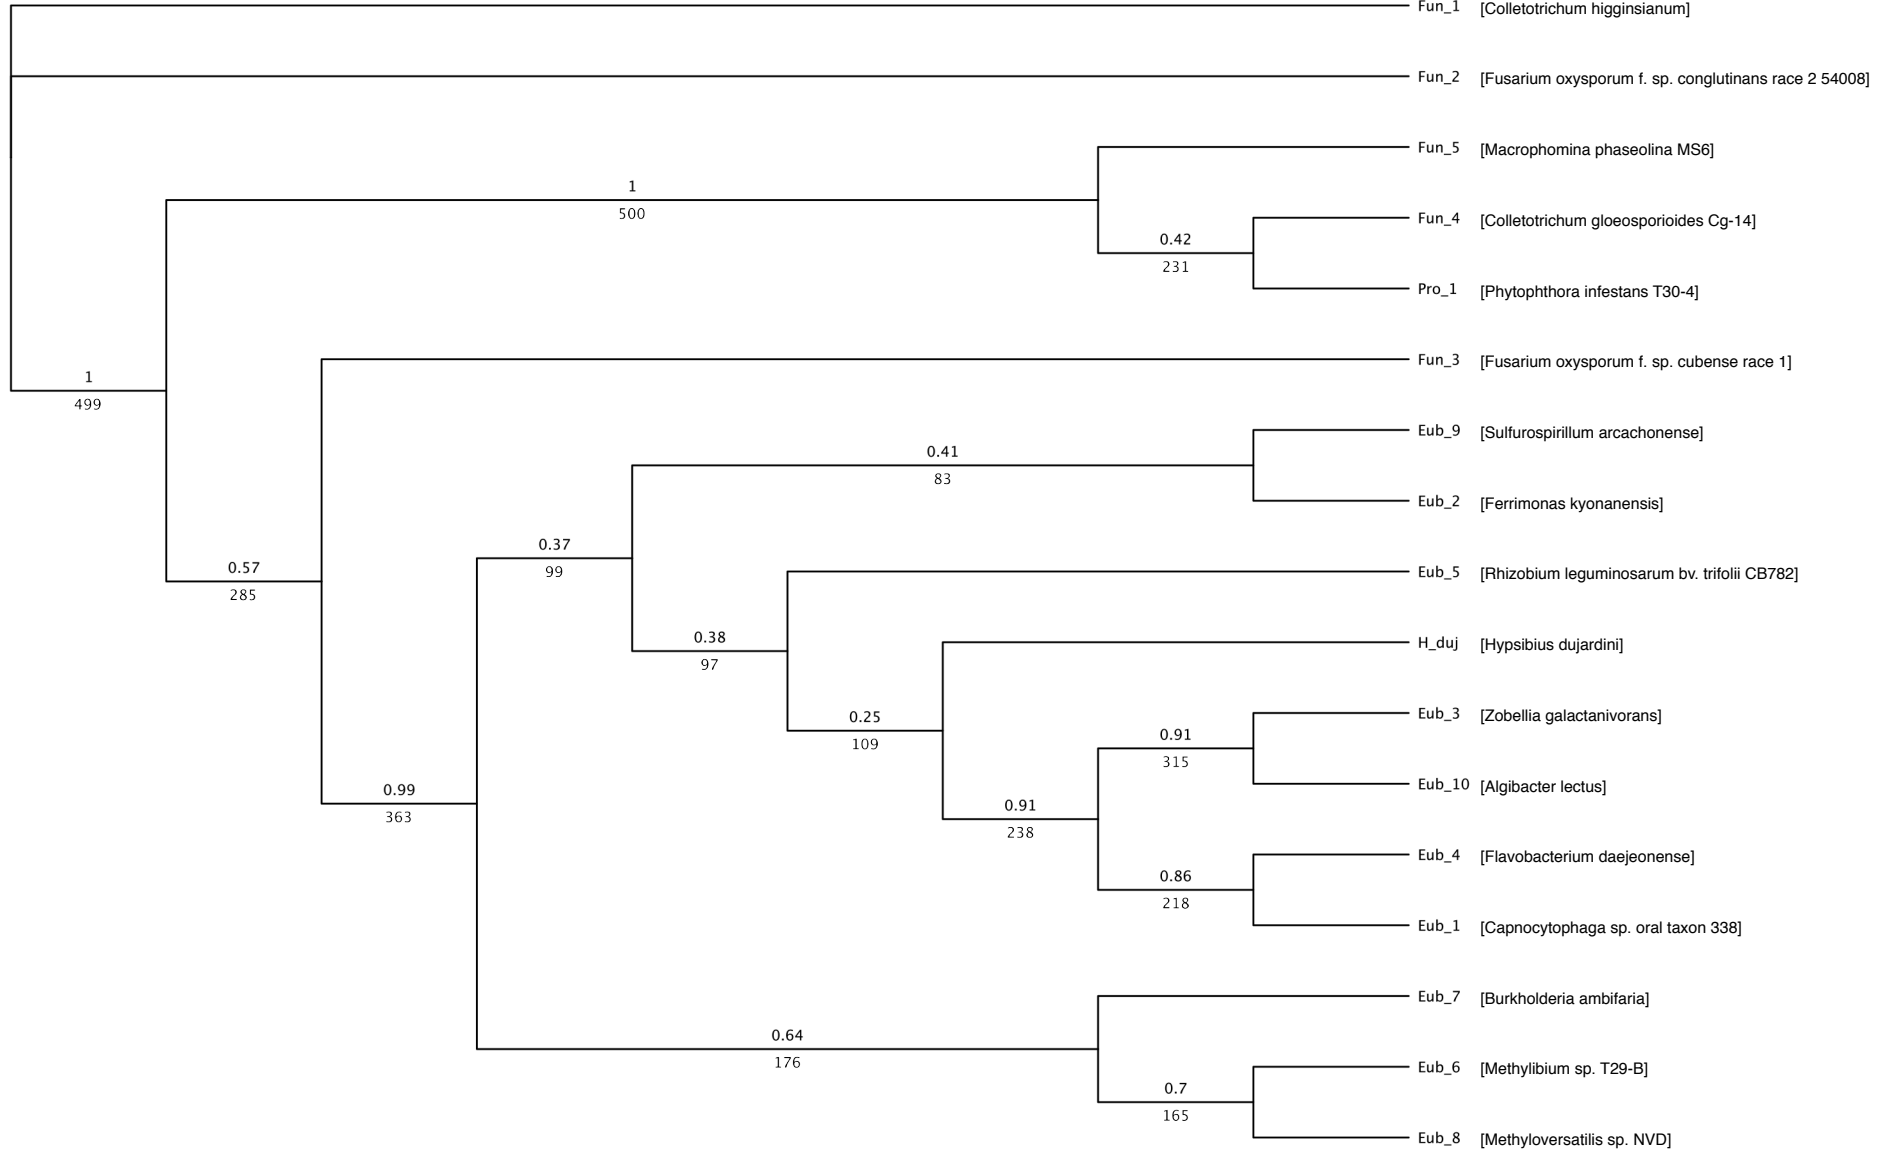

maker\_scaffold6505\_size12078\_augustus\_gene\_0.8

predicted protein

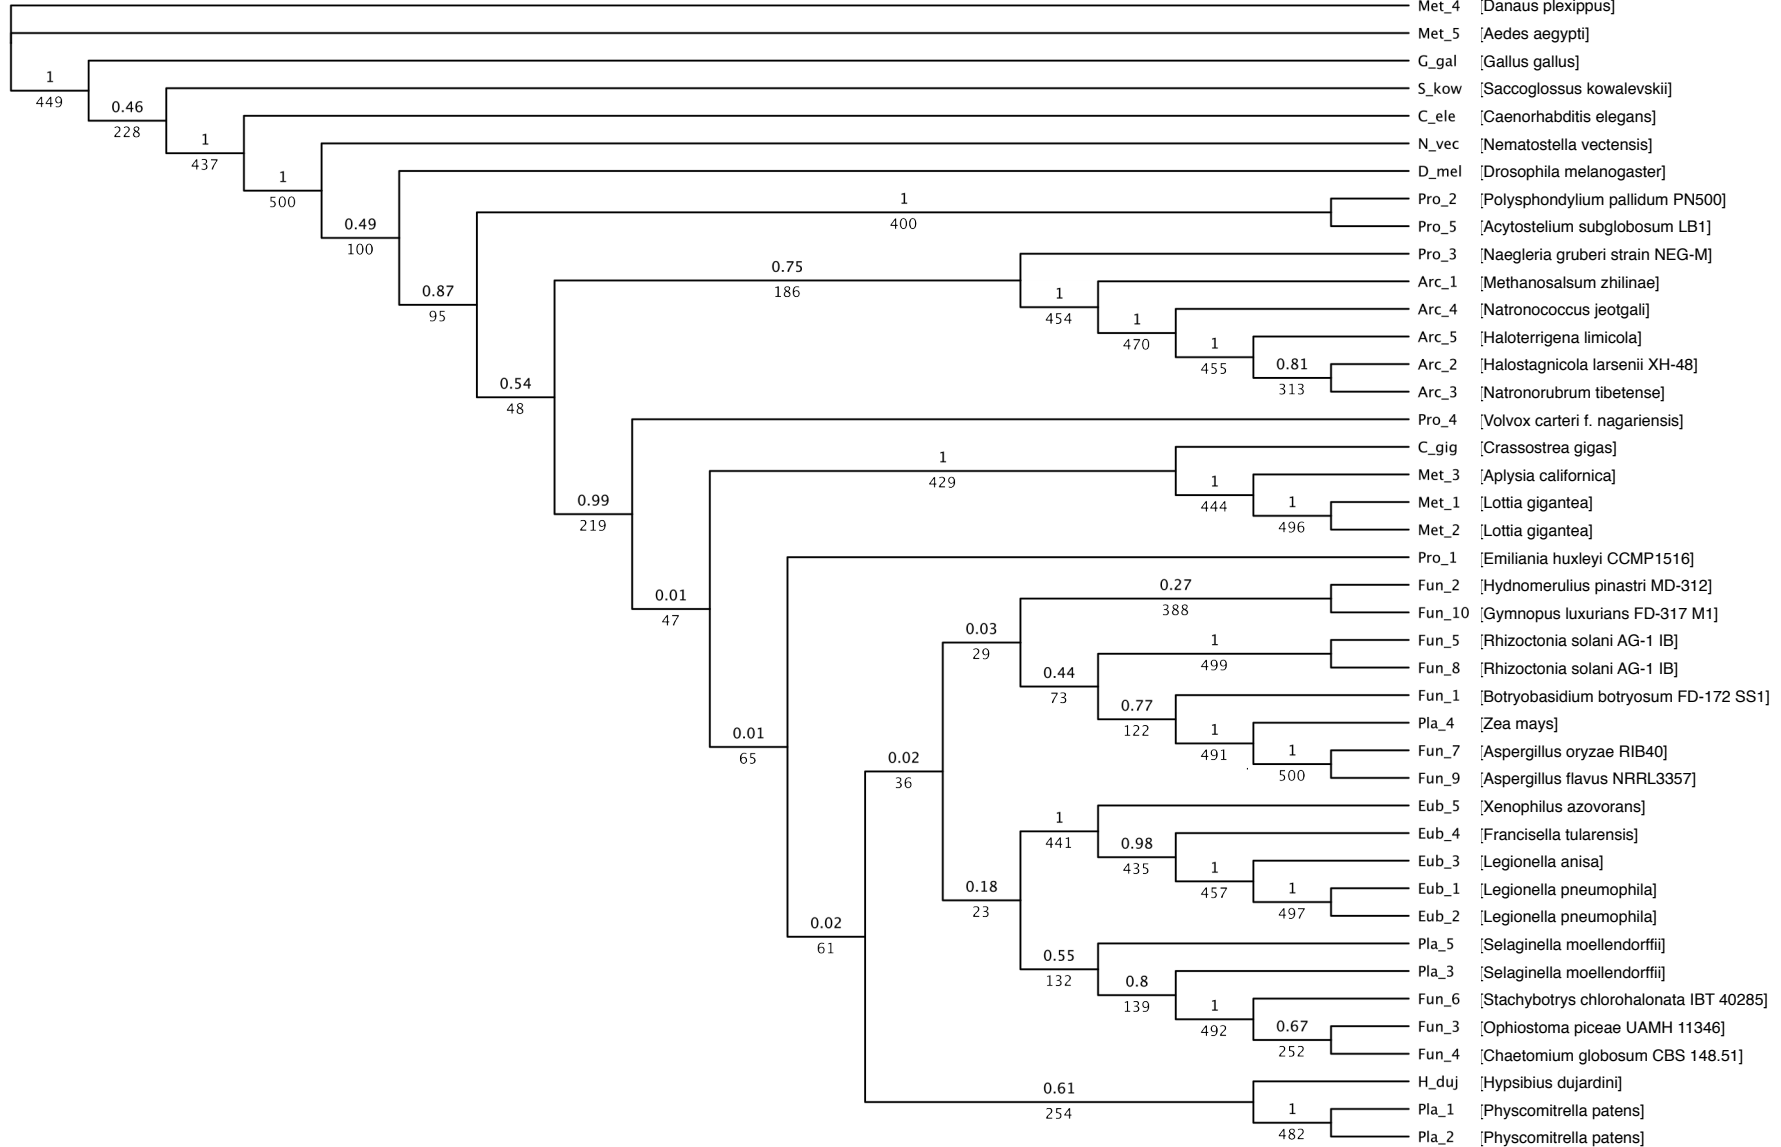

maker\_scaffold6486\_size12099\_snap\_gene\_0.18

hypothetical protein

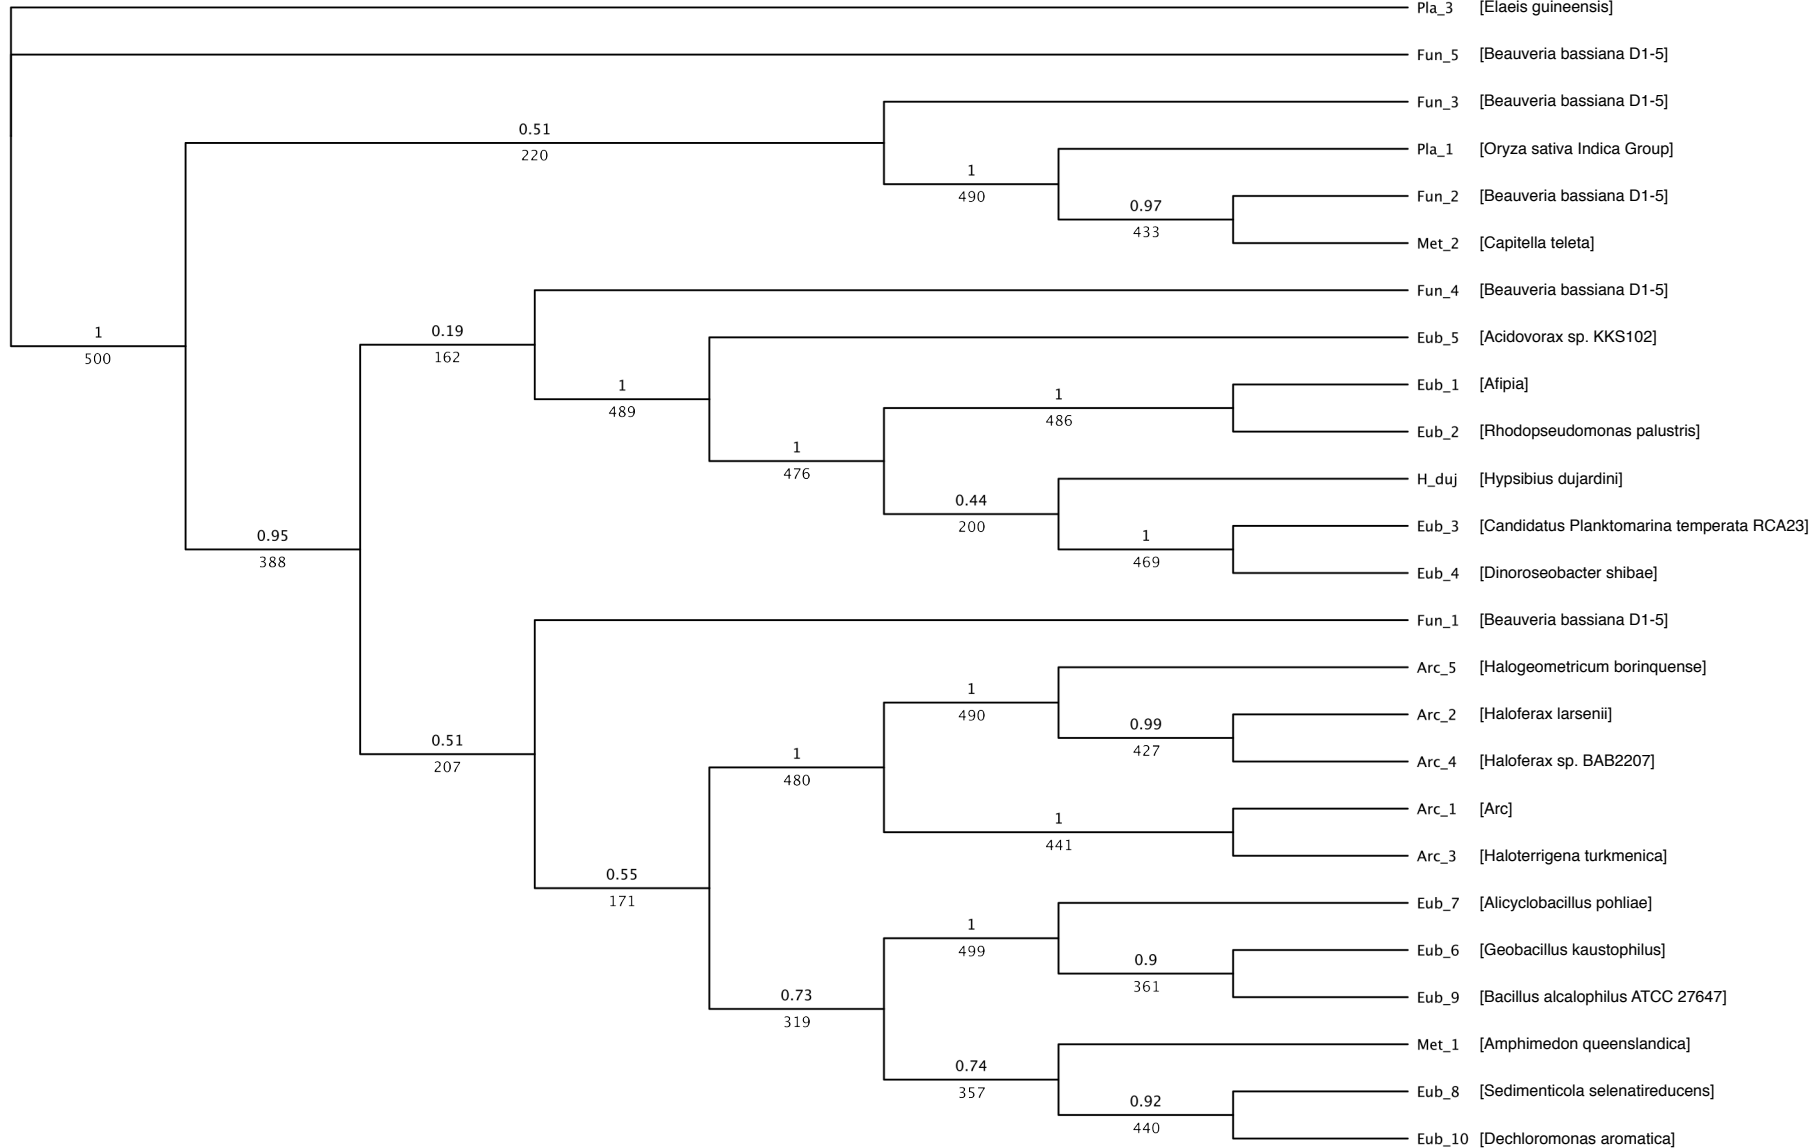

maker\_scaffold6361\_size12239\_augustus\_gene\_0.6

hypothetical protein MELLADRAFT\_23711

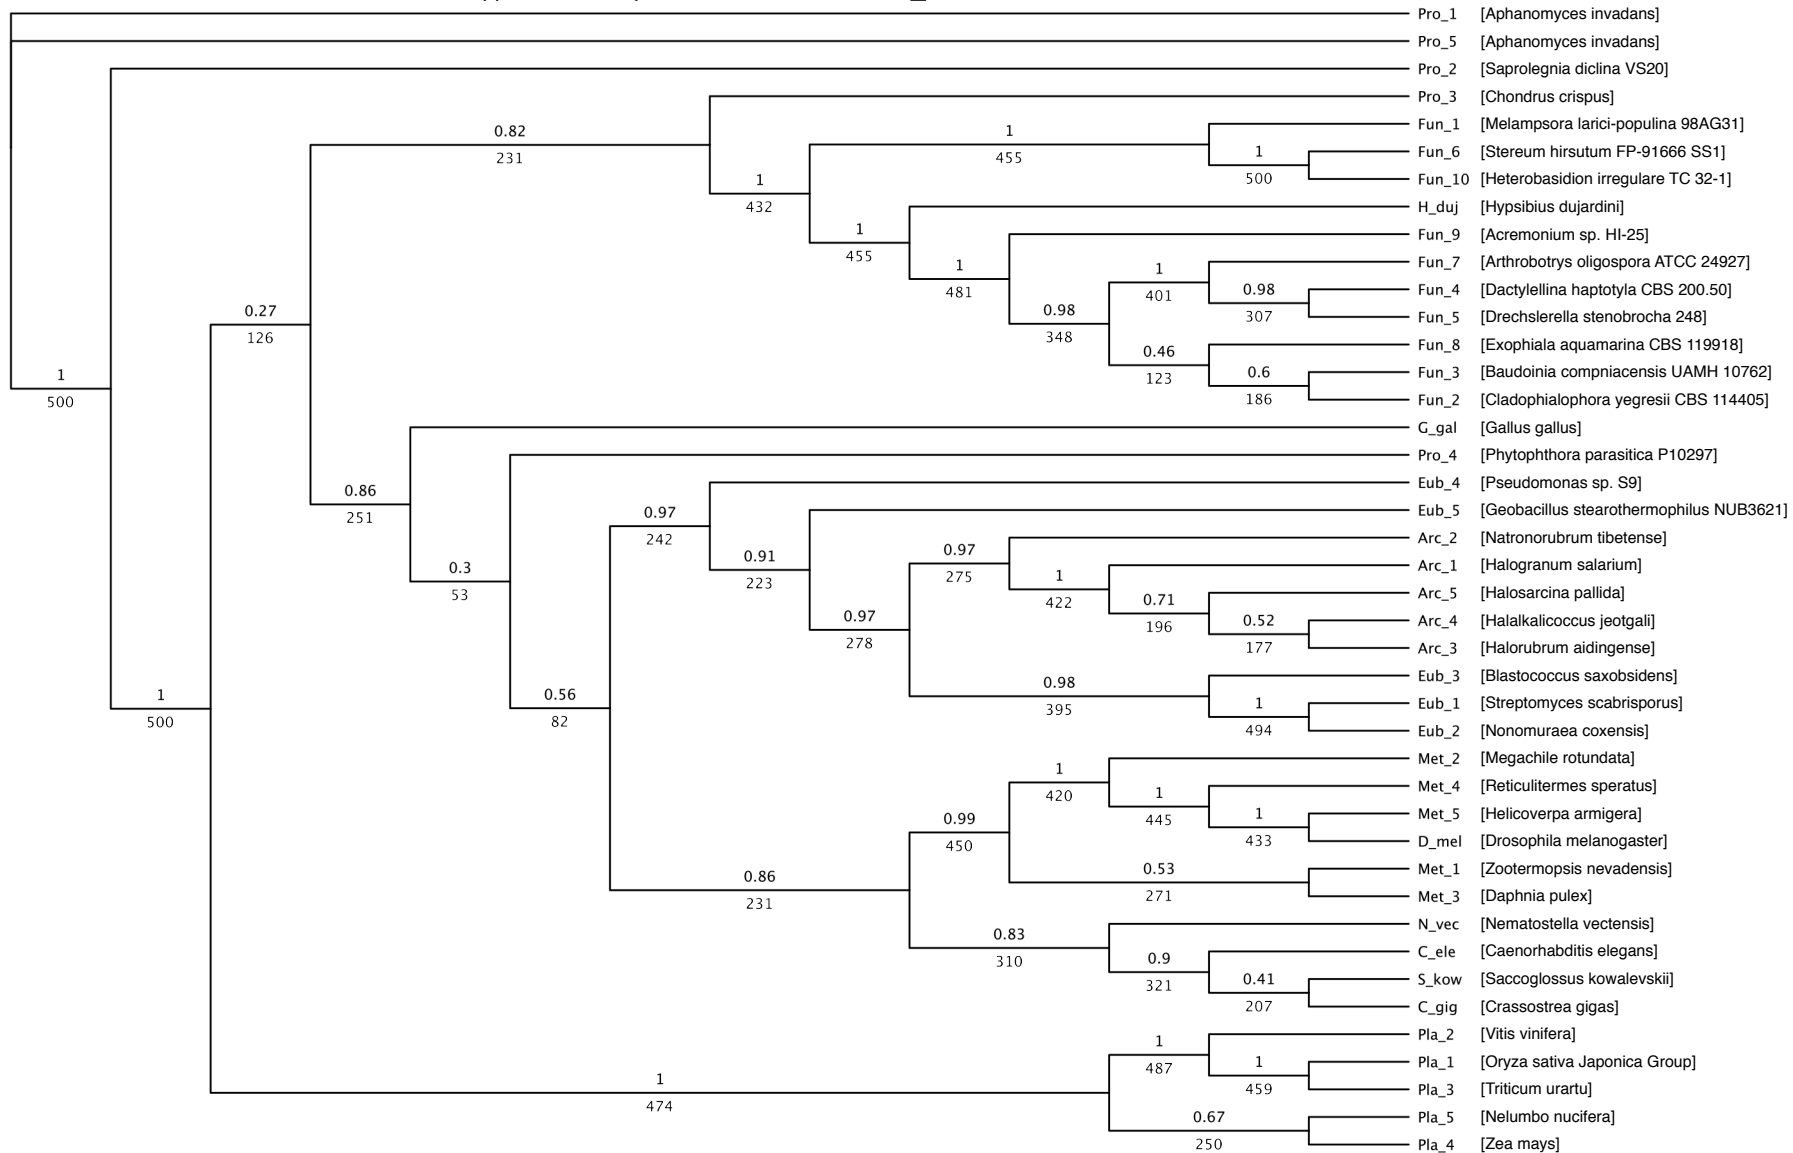



DJ-1/Pfpl family protein

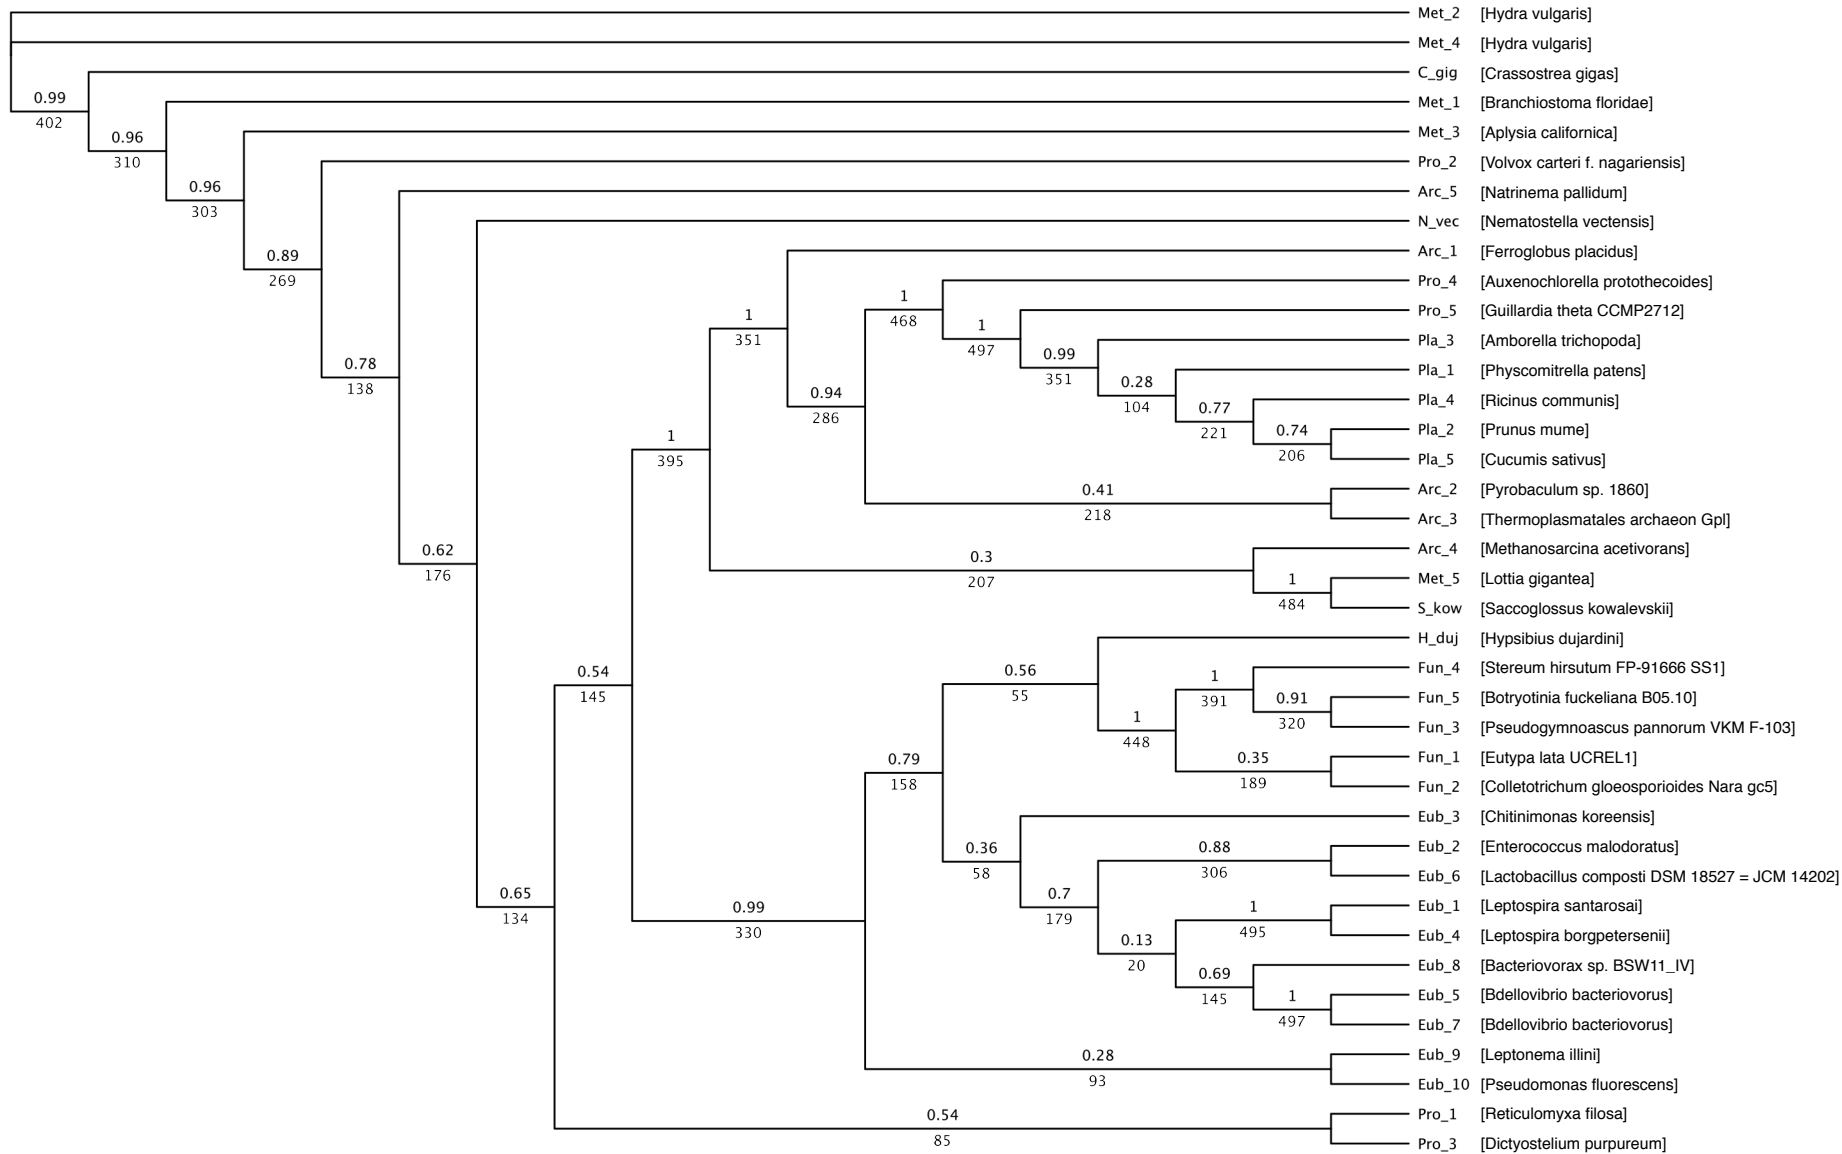

maker\_scaffold6104\_size12615\_augustus\_gene\_0.9

hypothetical protein W97\_07117

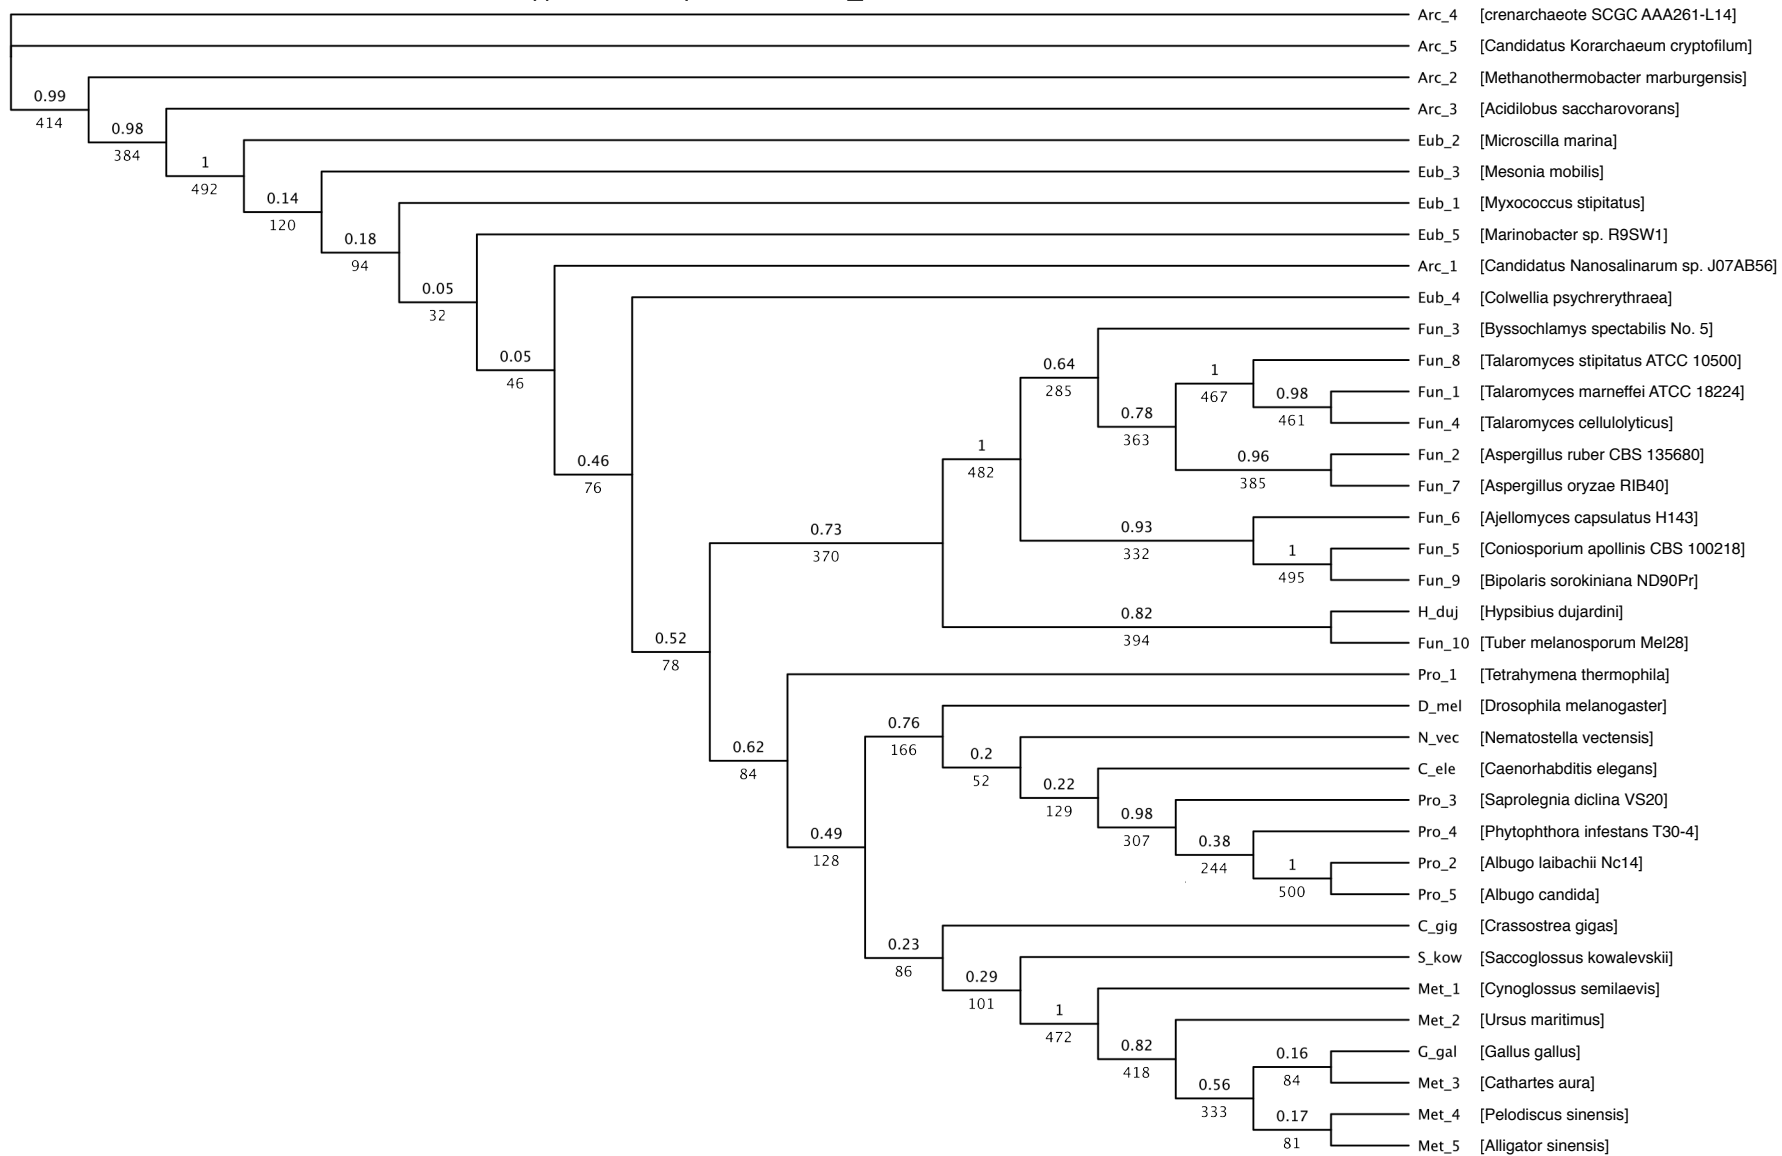

maker\_scaffold5875\_size12964\_augustus\_gene\_0.12  
glycoside hydrolase family 3 protein

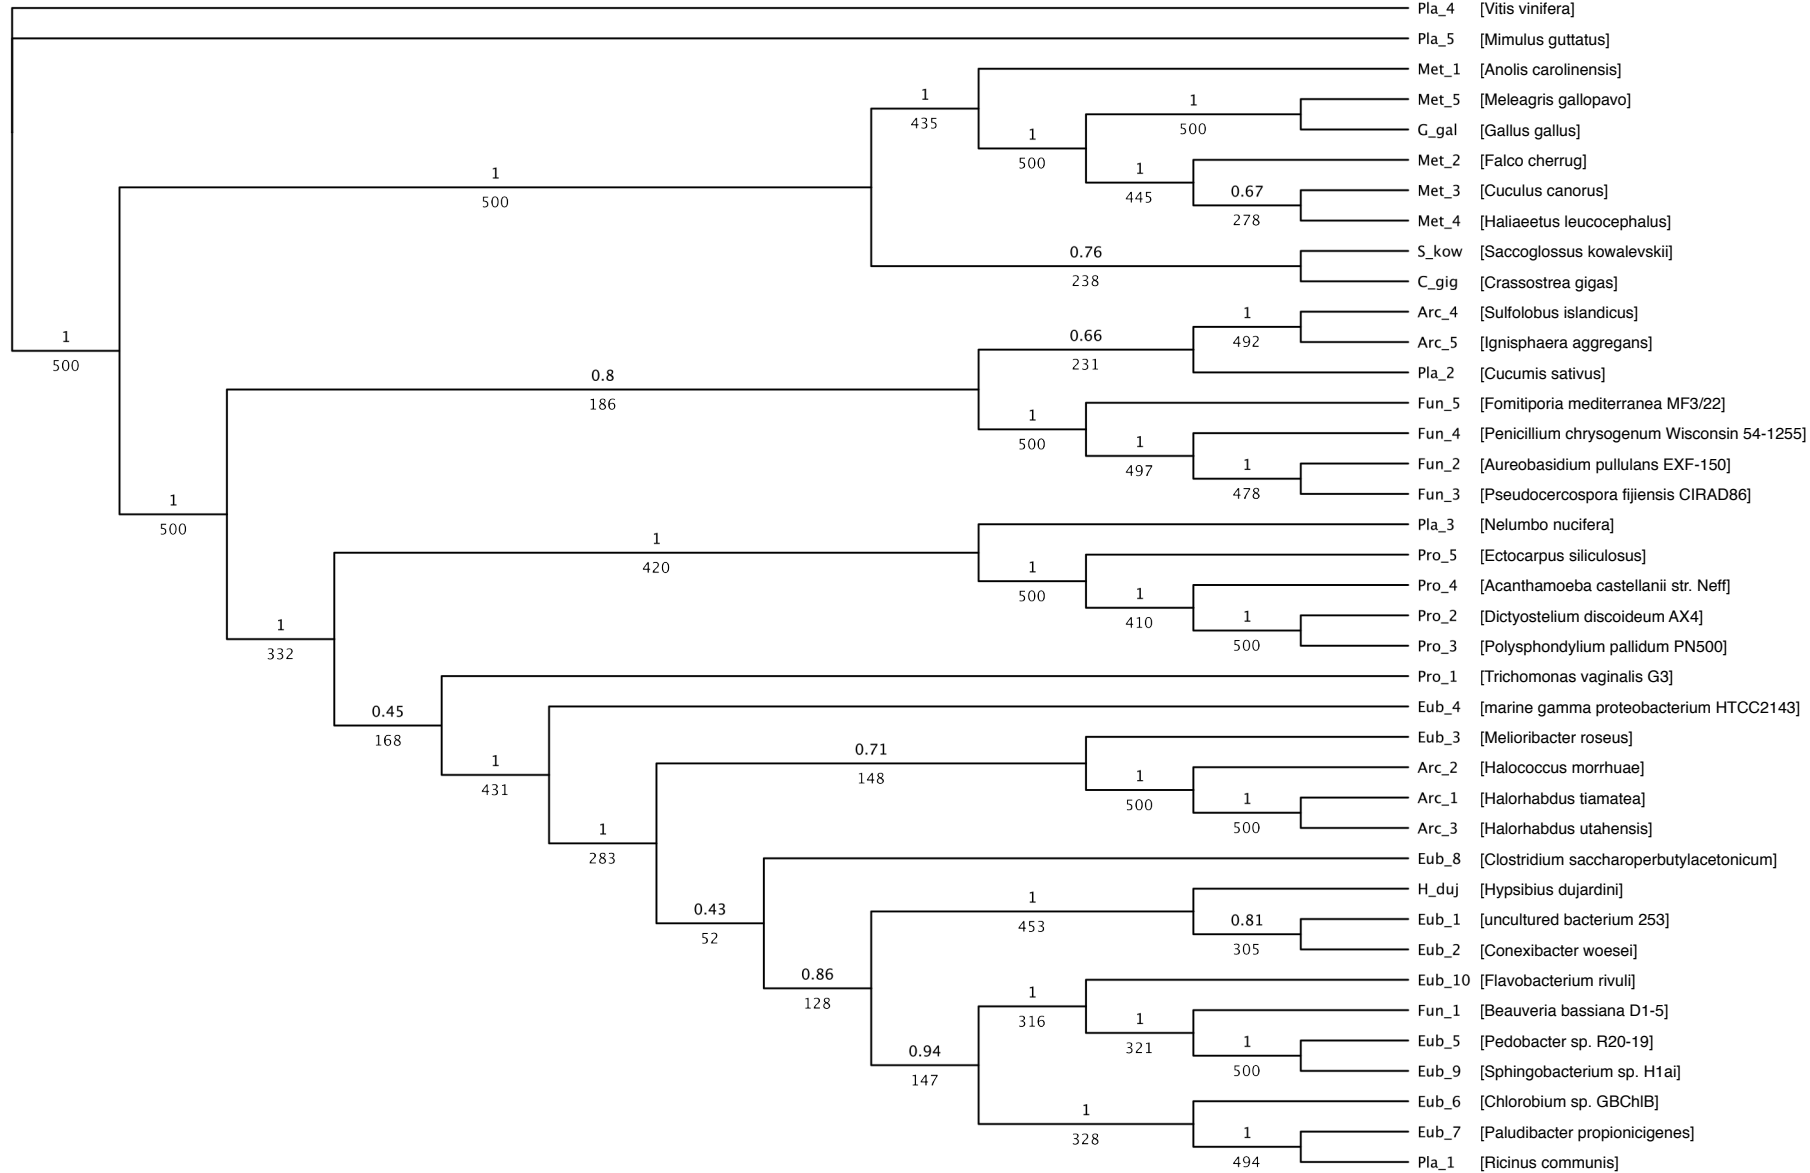

hypothetical protein mv\_R860

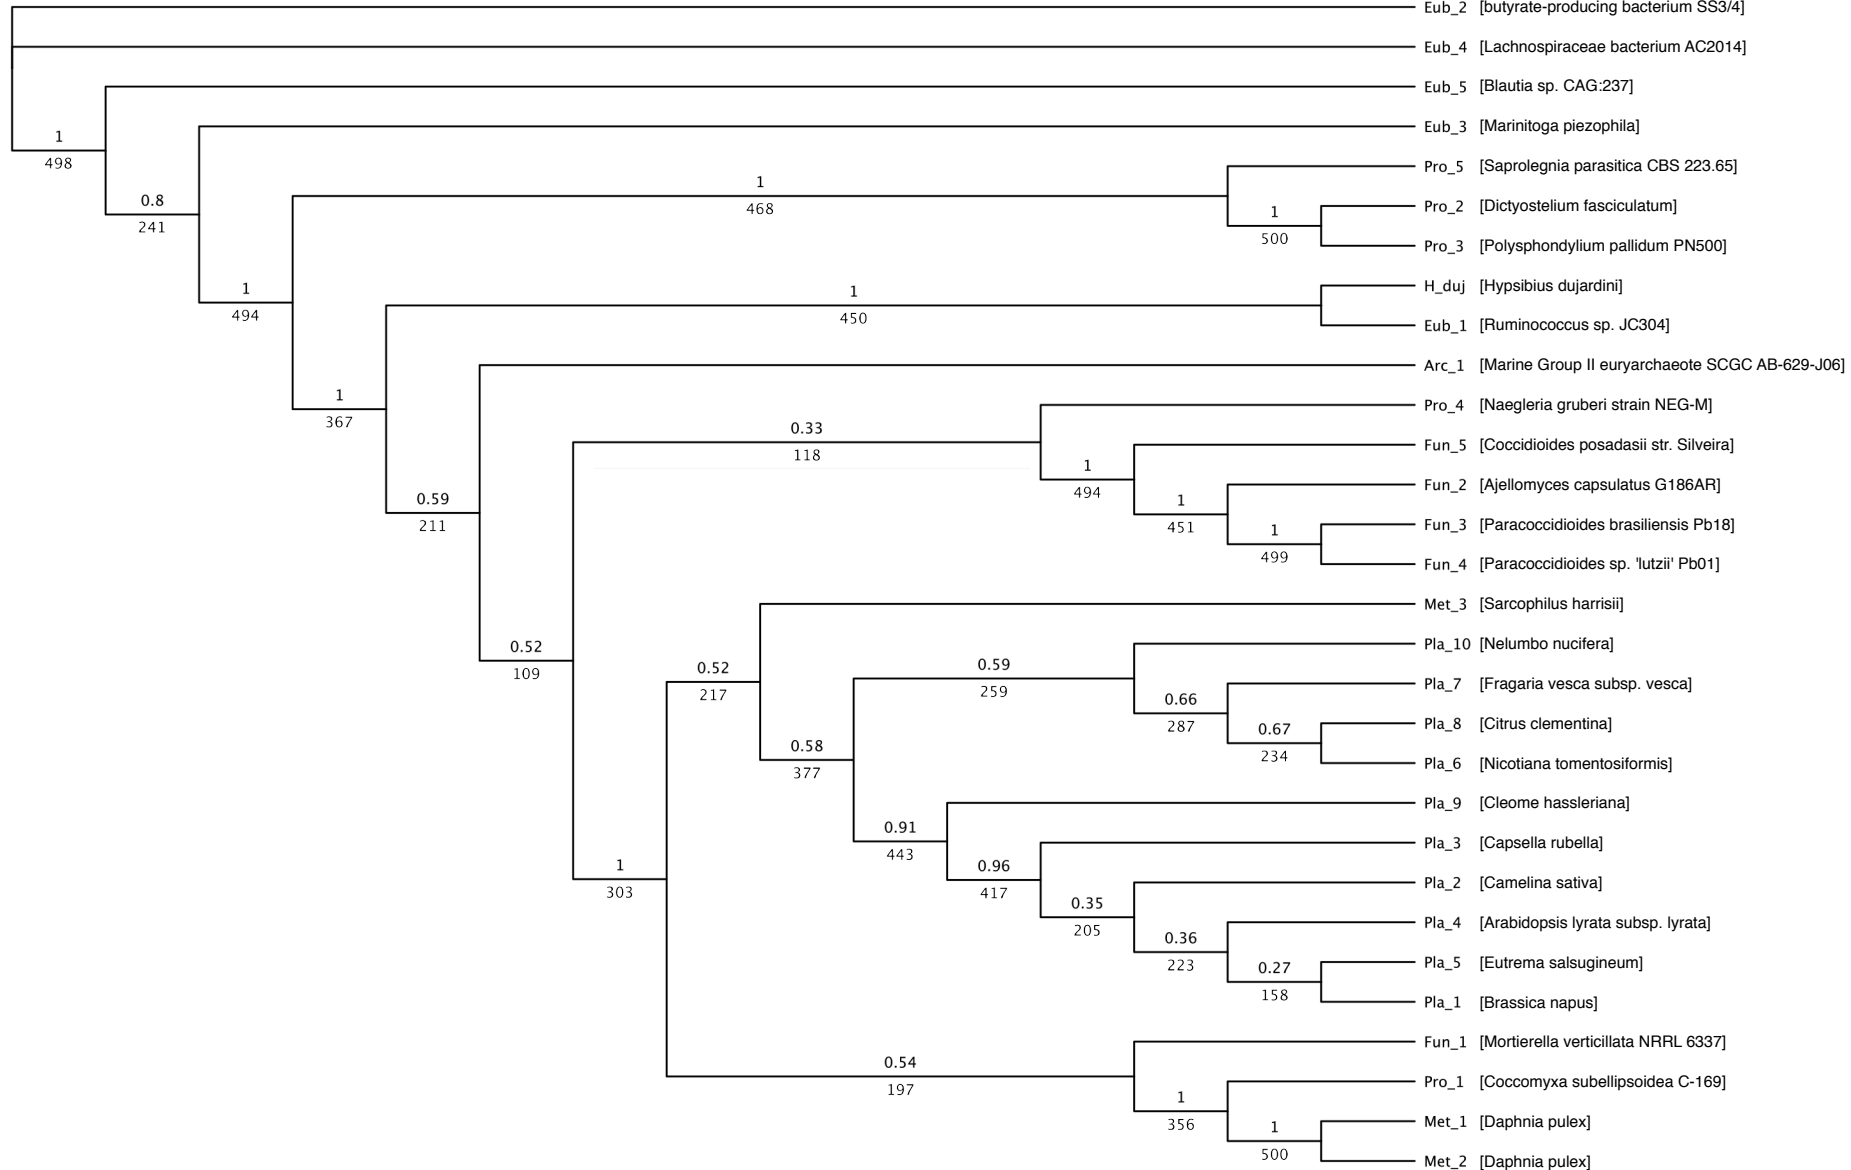

maker\_scaffold5005\_size27369\_snap\_gene\_0.11

hypothetical protein H072\_8118

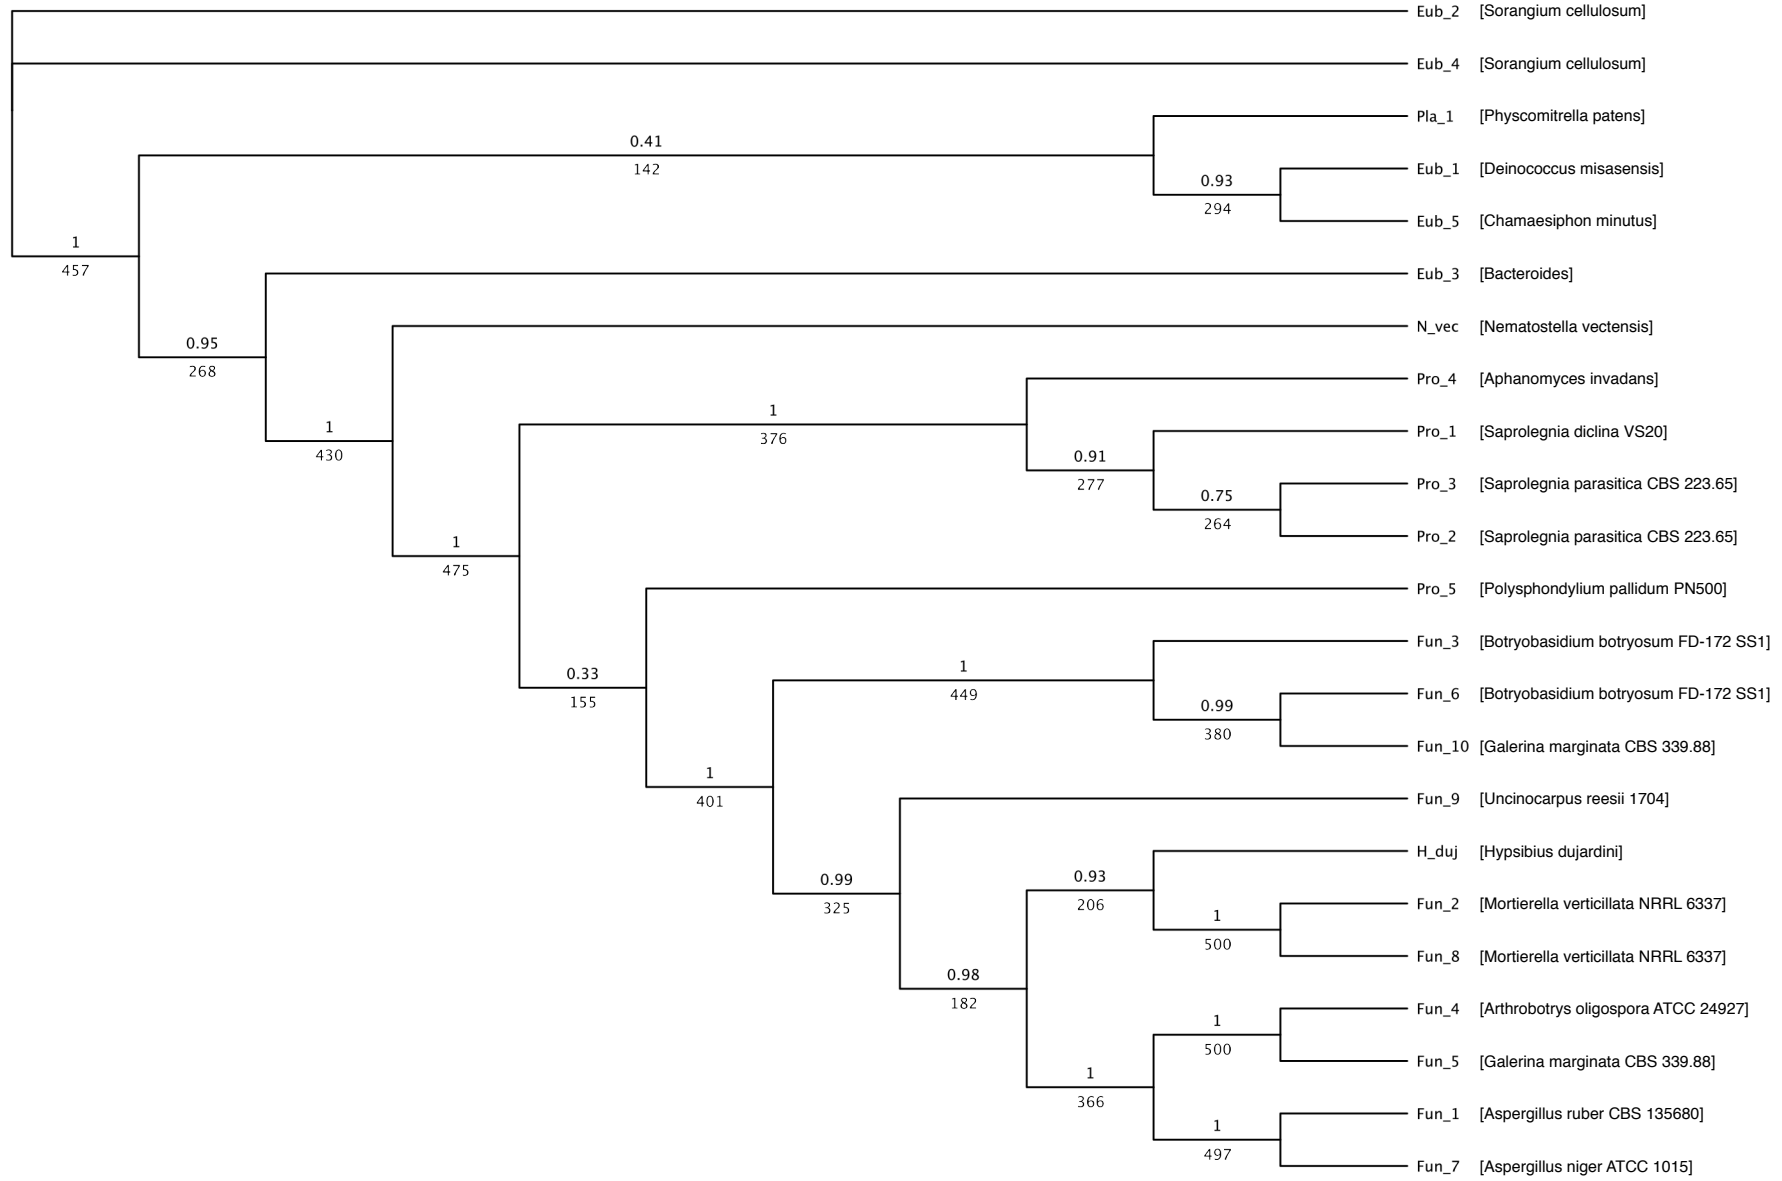

maker\_scaffold4964\_size23147\_snap\_gene\_0.19  
hypothetical protein SELMODRAFT\_96185

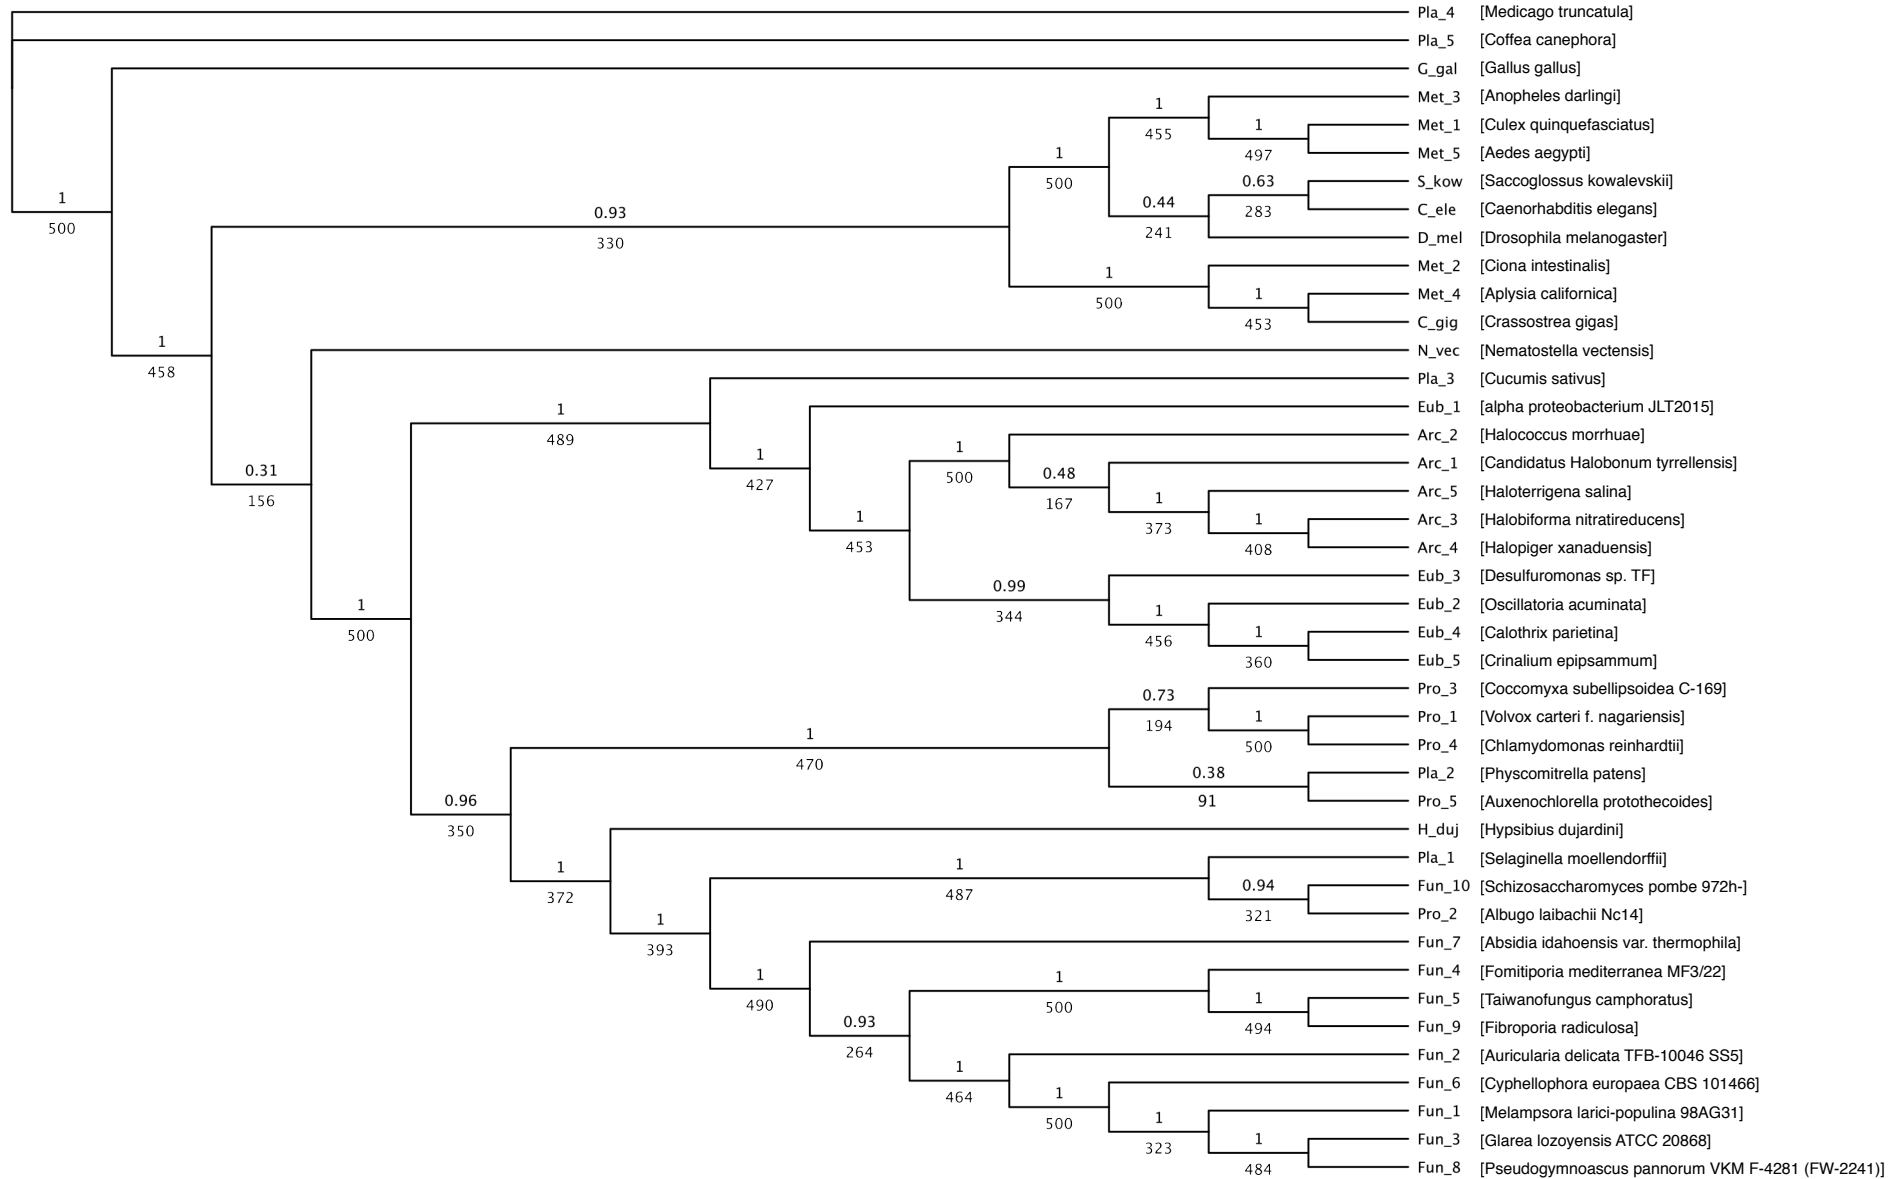

maker\_scaffold4690\_snap\_gene\_0.16  
exodeoxyribonuclease III

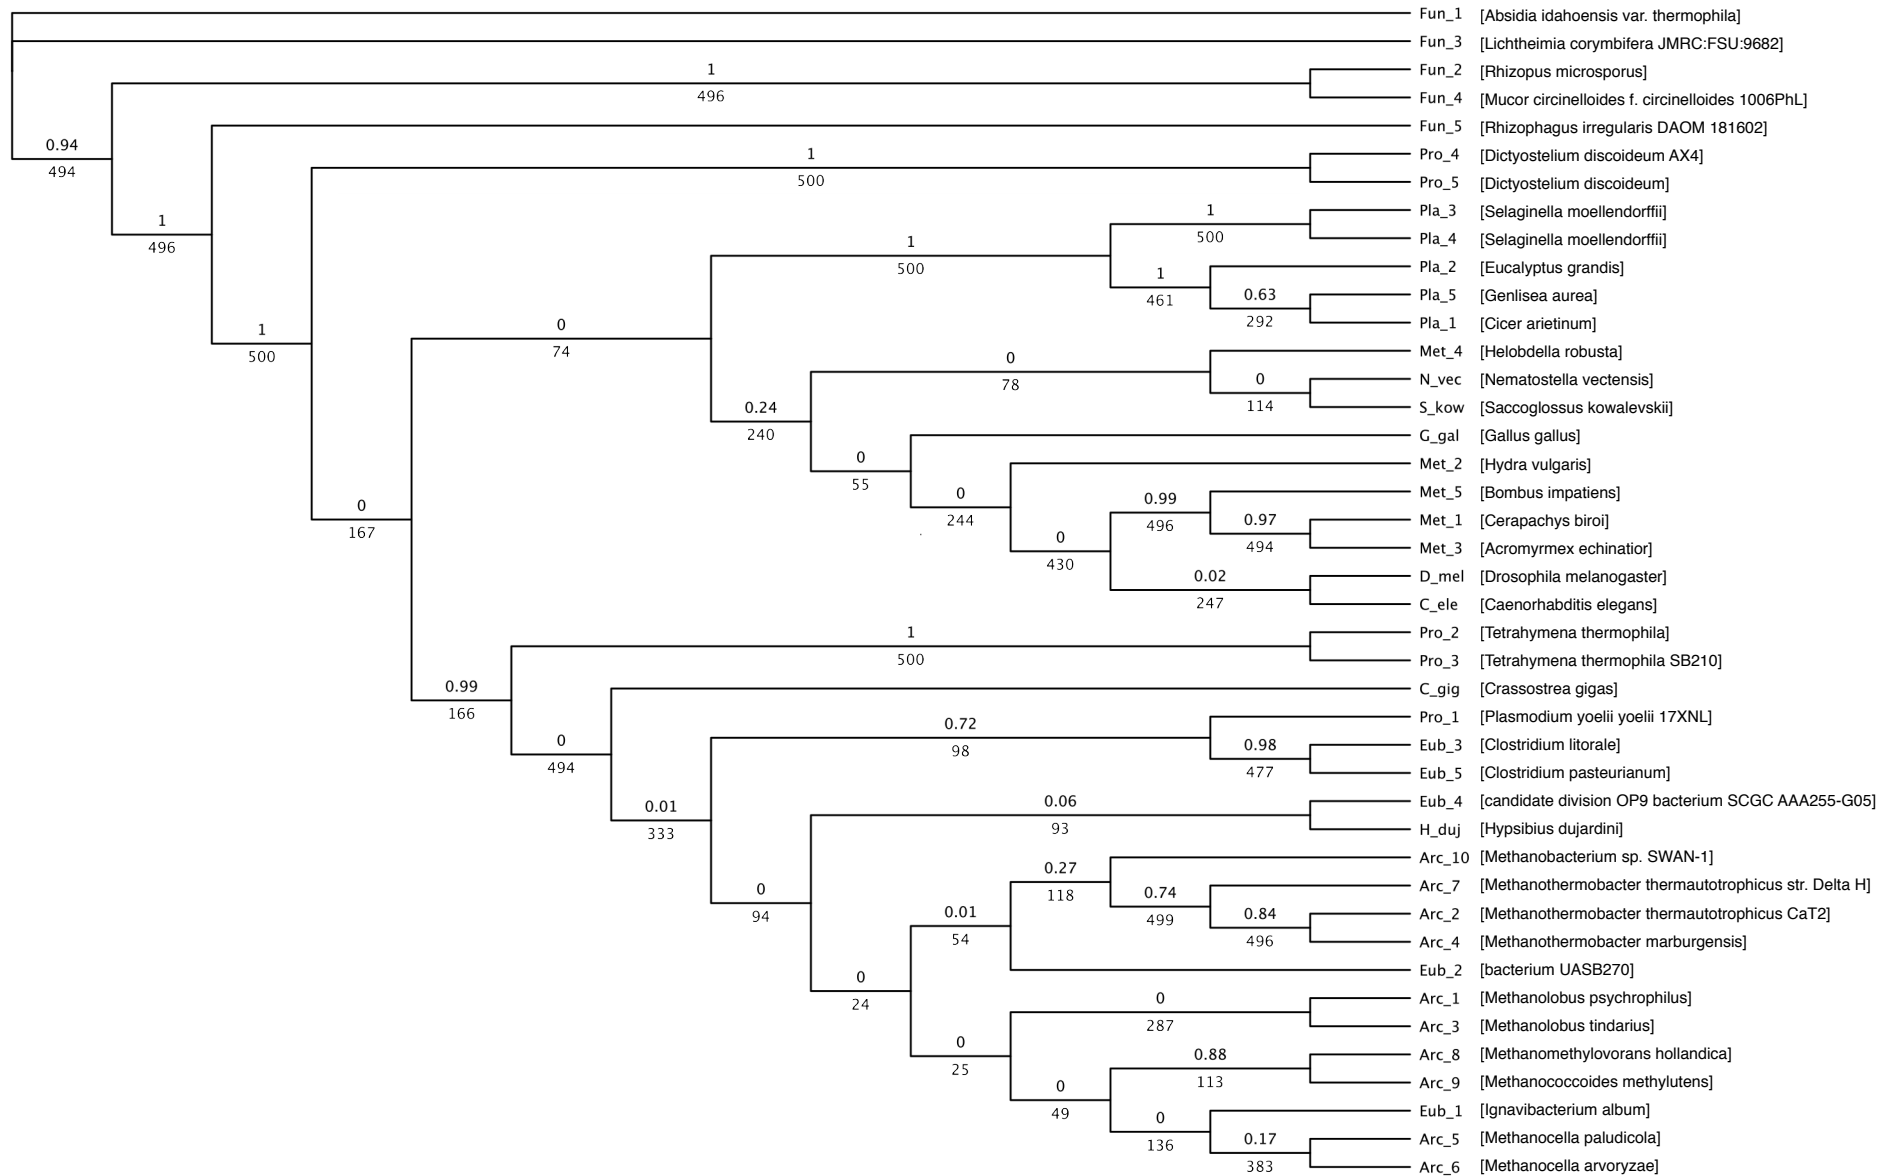

maker\_scaffold3763\_size17107\_snap\_gene\_0.14

hypothetical protein ASPNIDRAFT\_45025

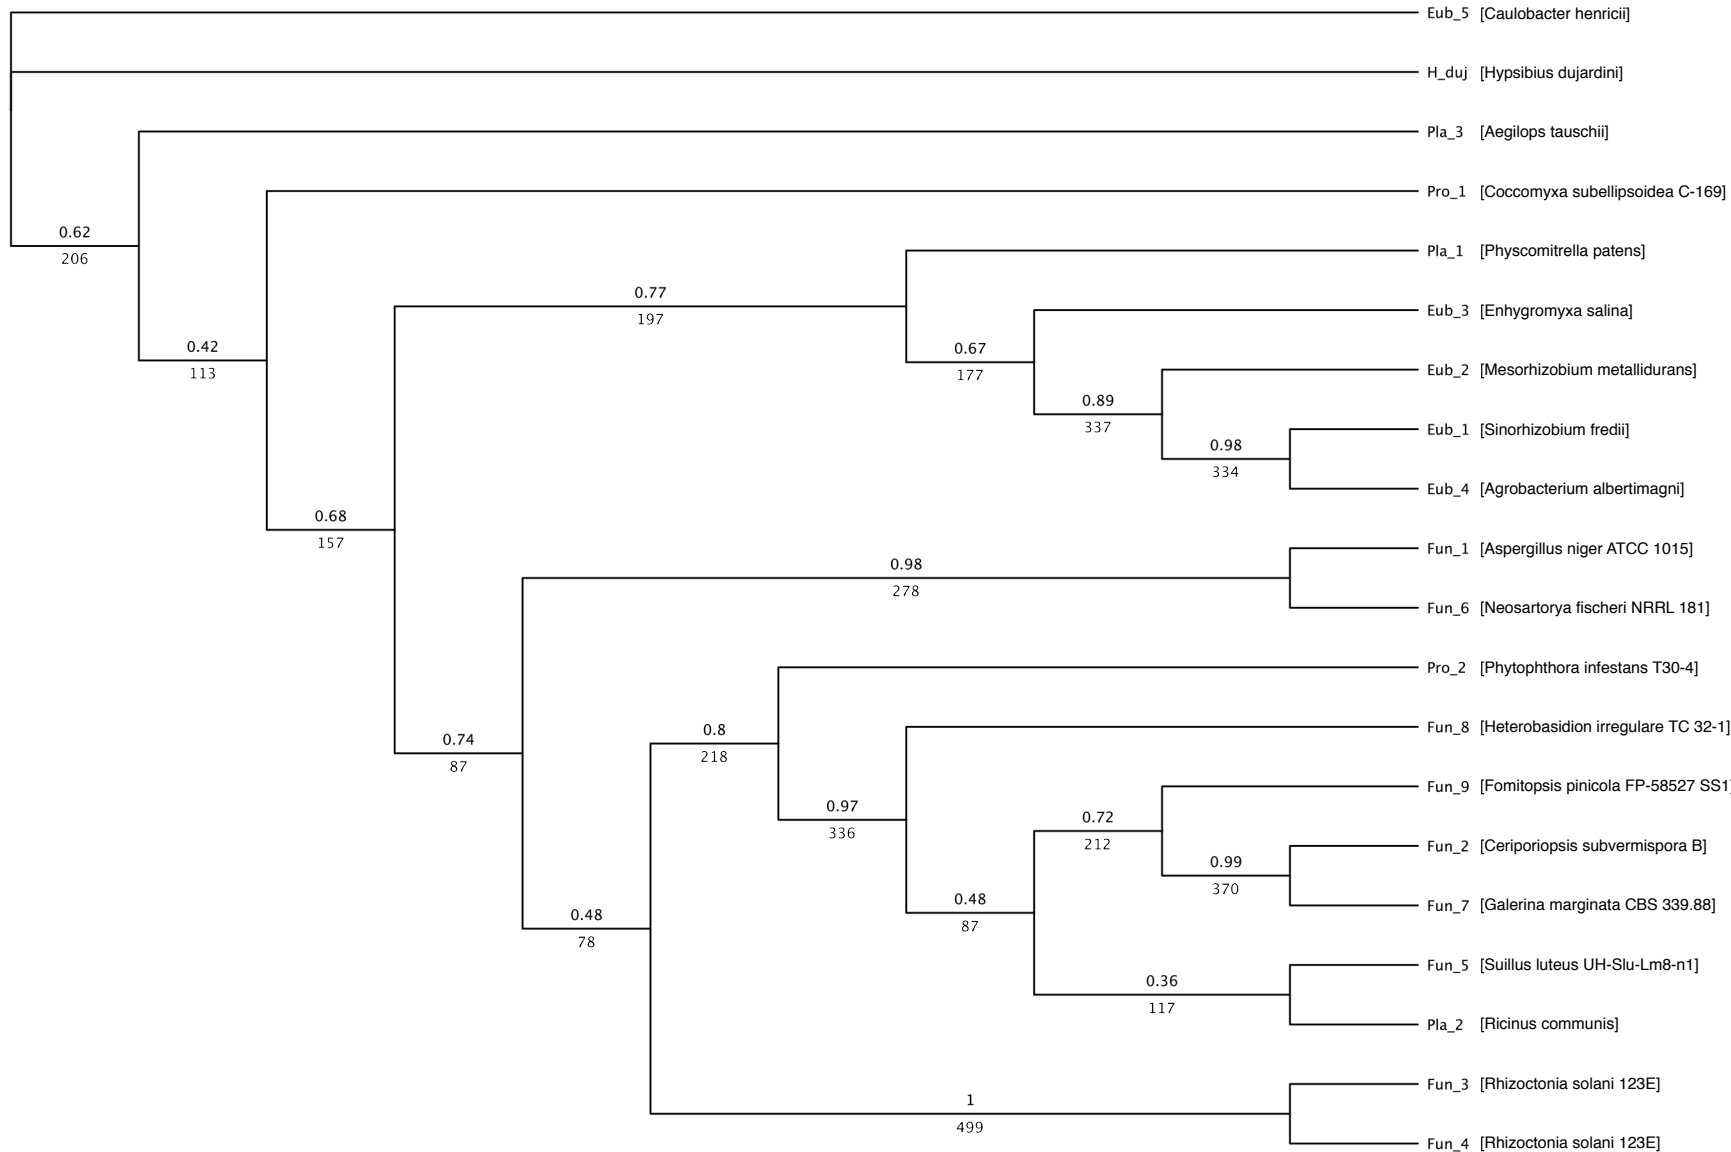



cyanate hydratase

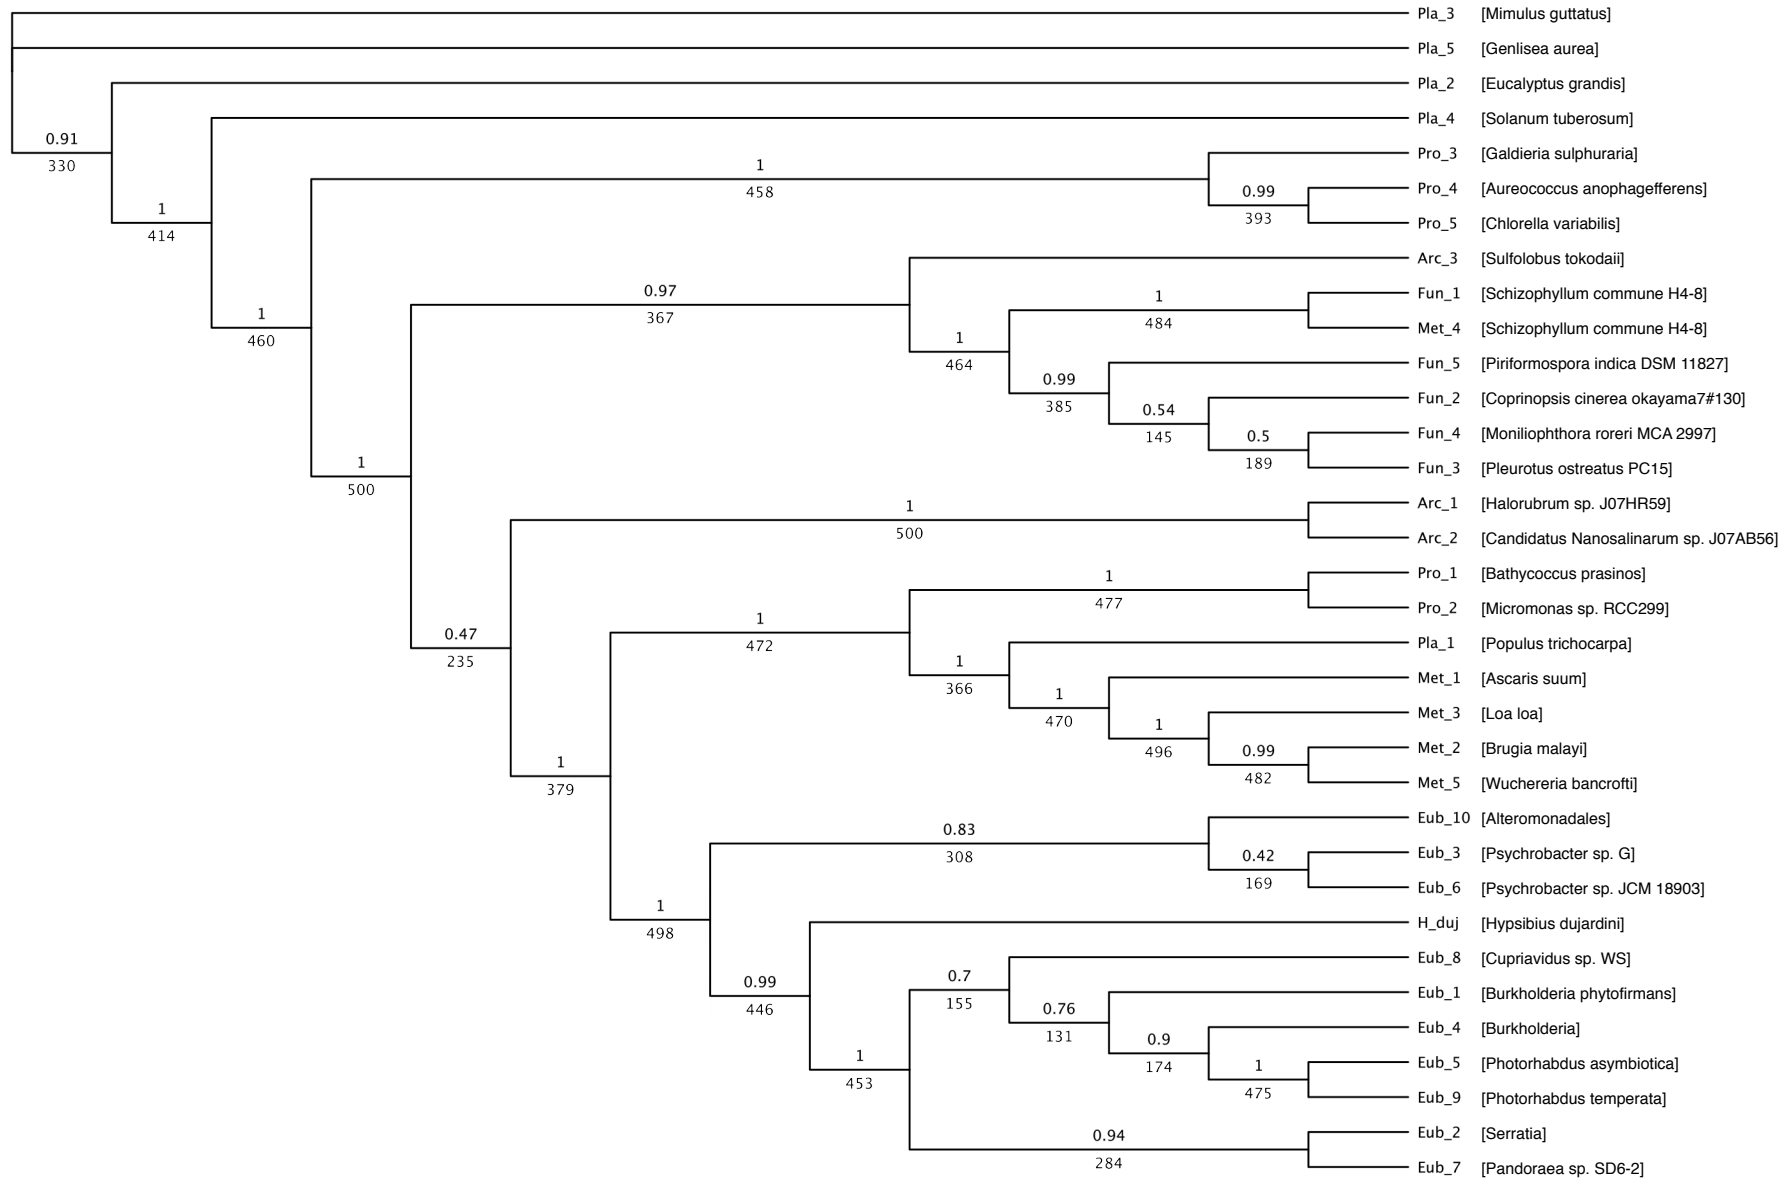

maker\_scaffold3259\_snap\_gene\_0.15

hypothetical protein mv\_R860

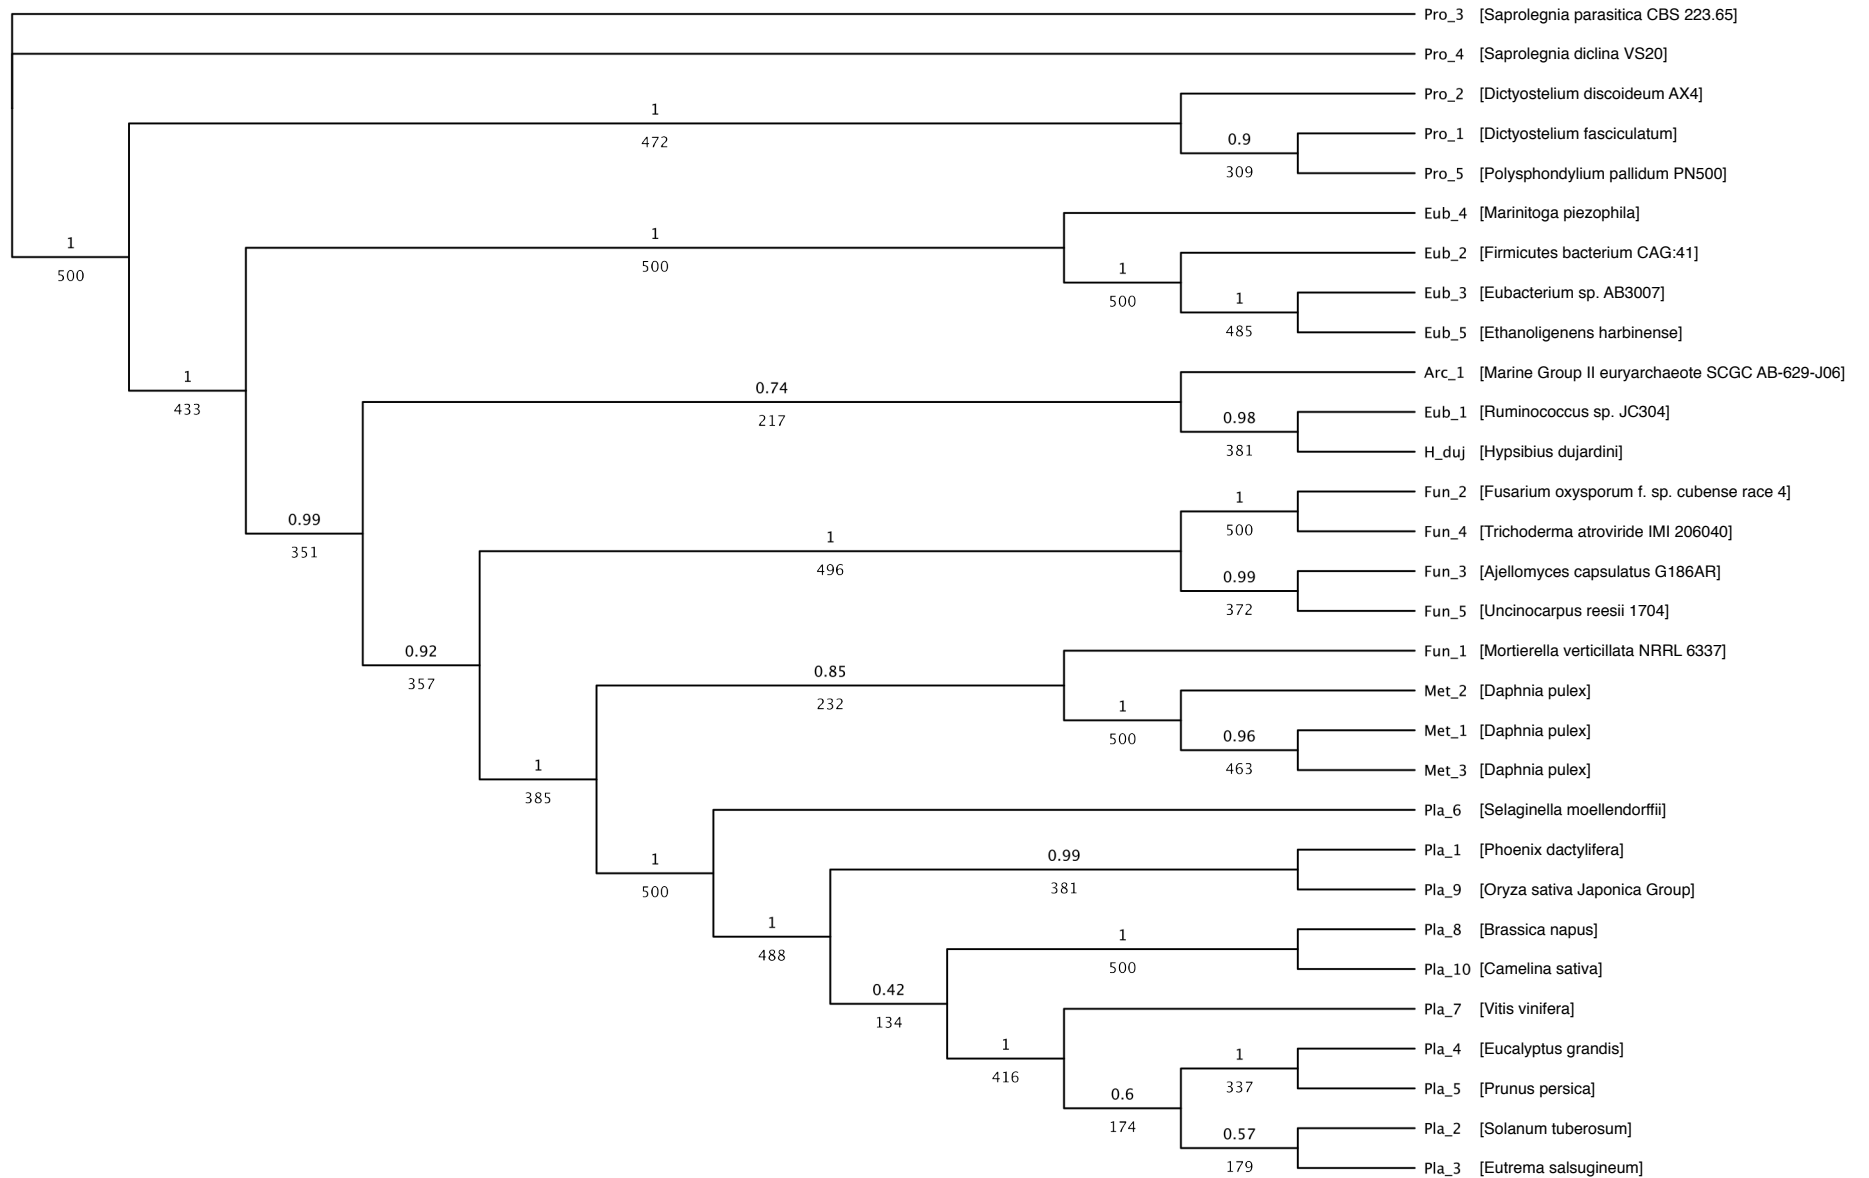

hypothetical protein

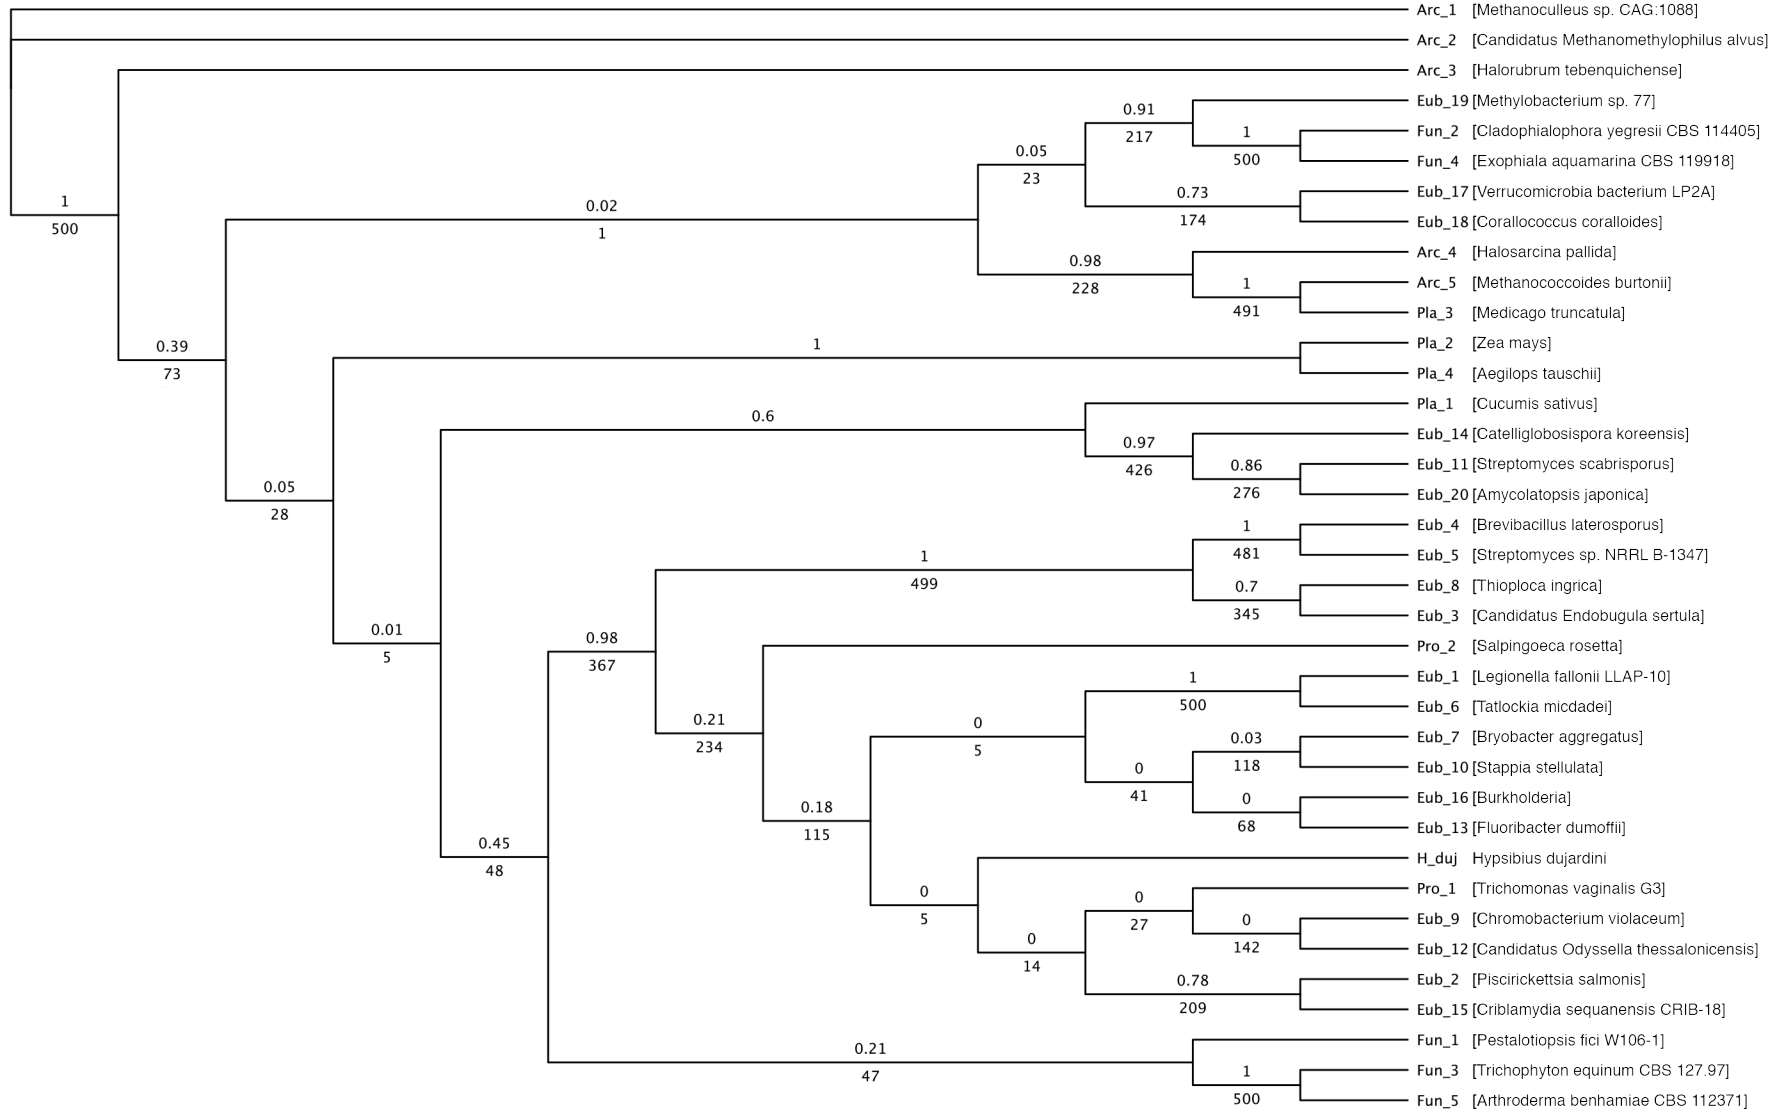

0.5

maker\_scaffold3236\_size18566\_augustus\_gene\_0.14  
hypothetical protein SELMODRAFT\_266960

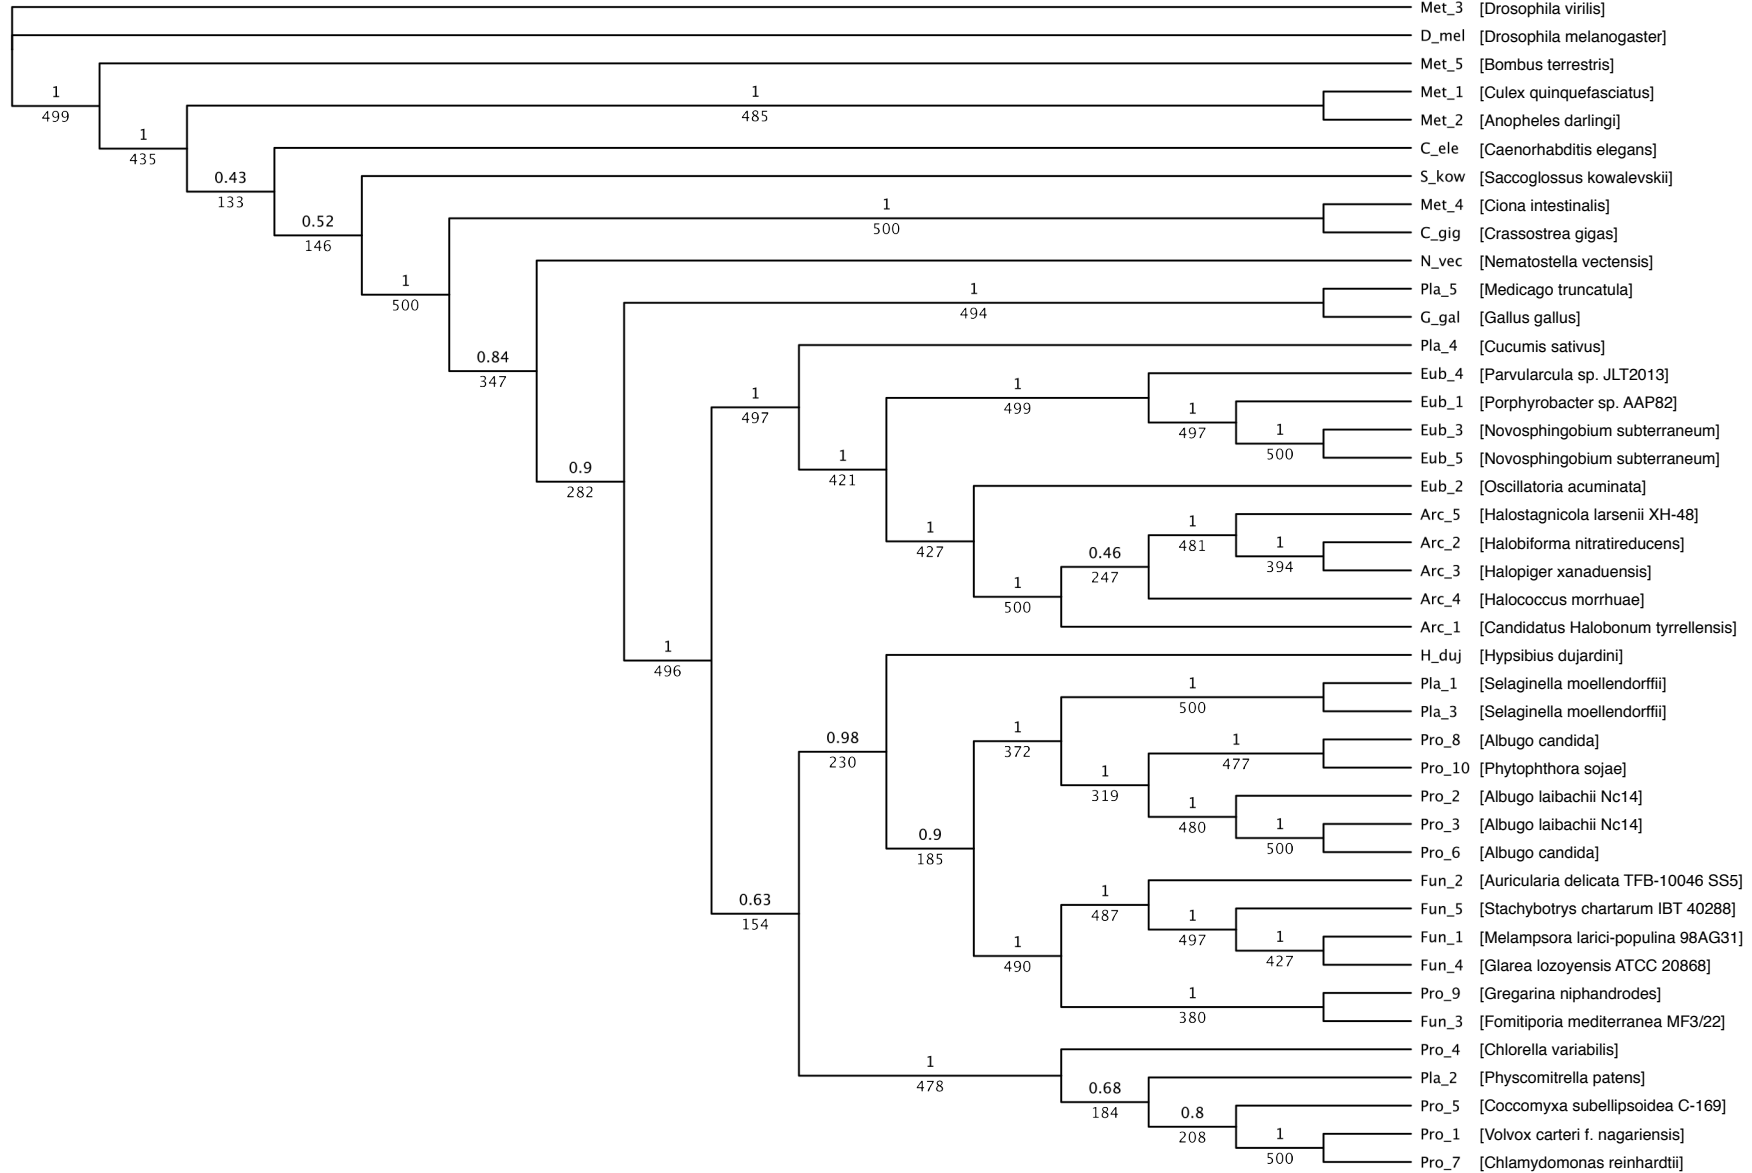

alpha/beta hydrolase

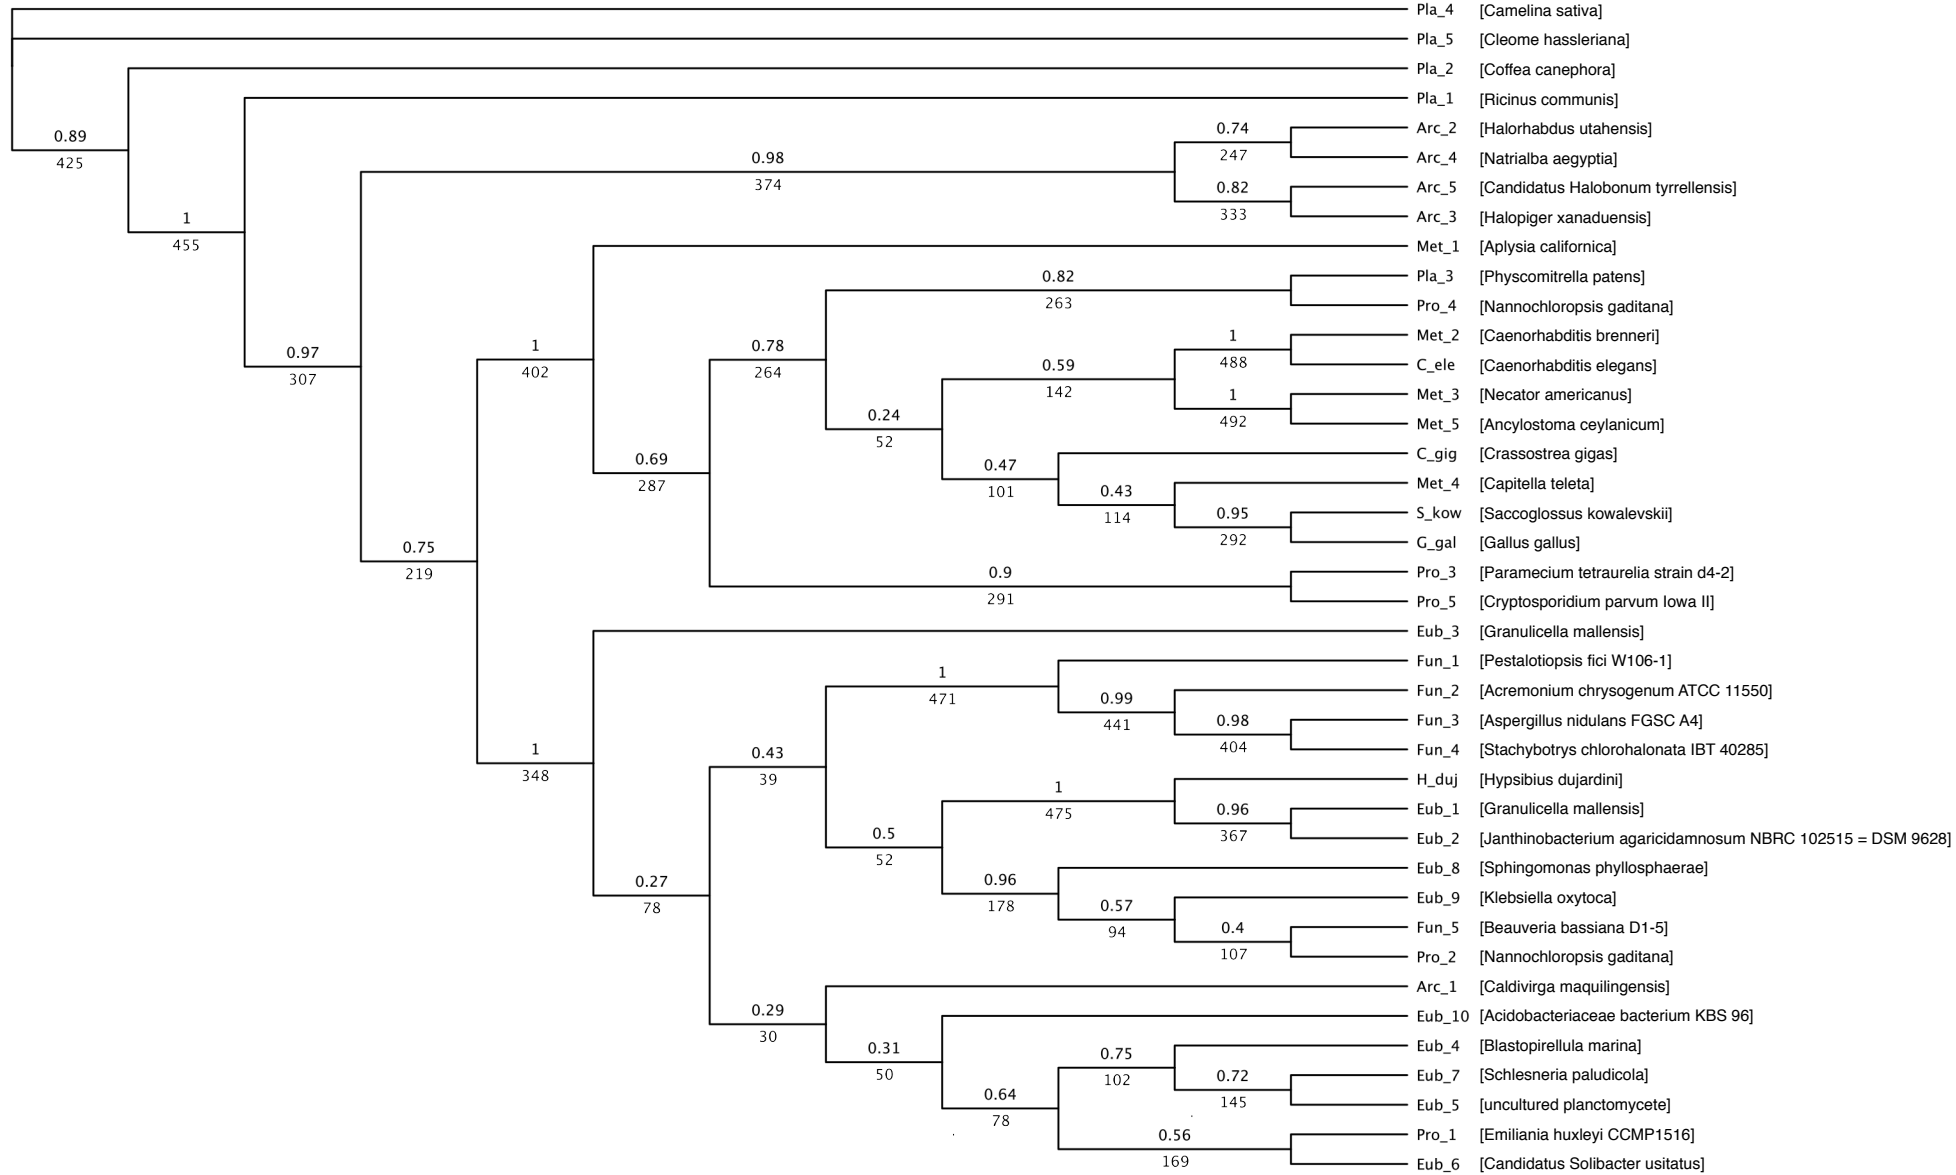

maker\_scaffold1970\_size23533\_snap\_gene\_0.24

hypothetical protein RLEG12\_03210

9

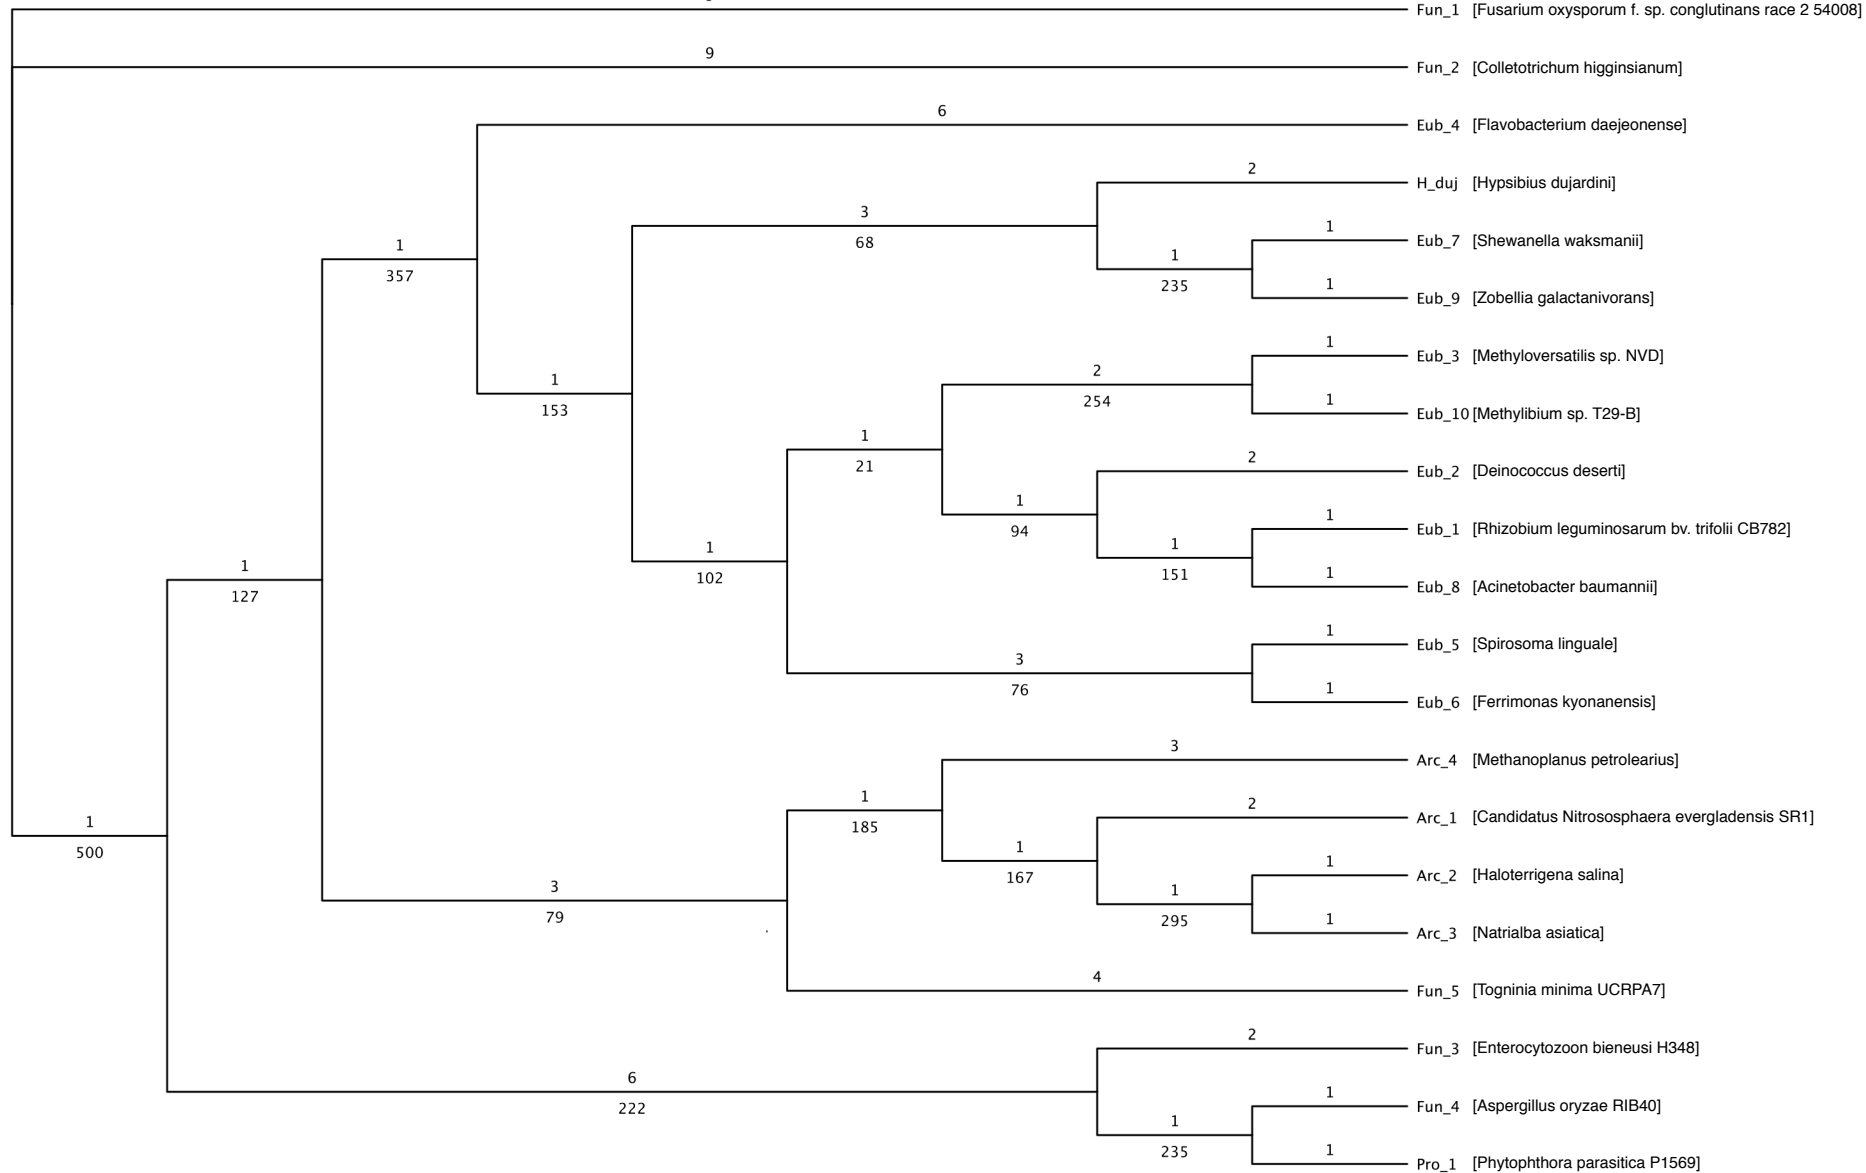

maker\_scaffold1864\_size33177\_snap\_gene\_0.15

glycoside hydrolase family 3 protein

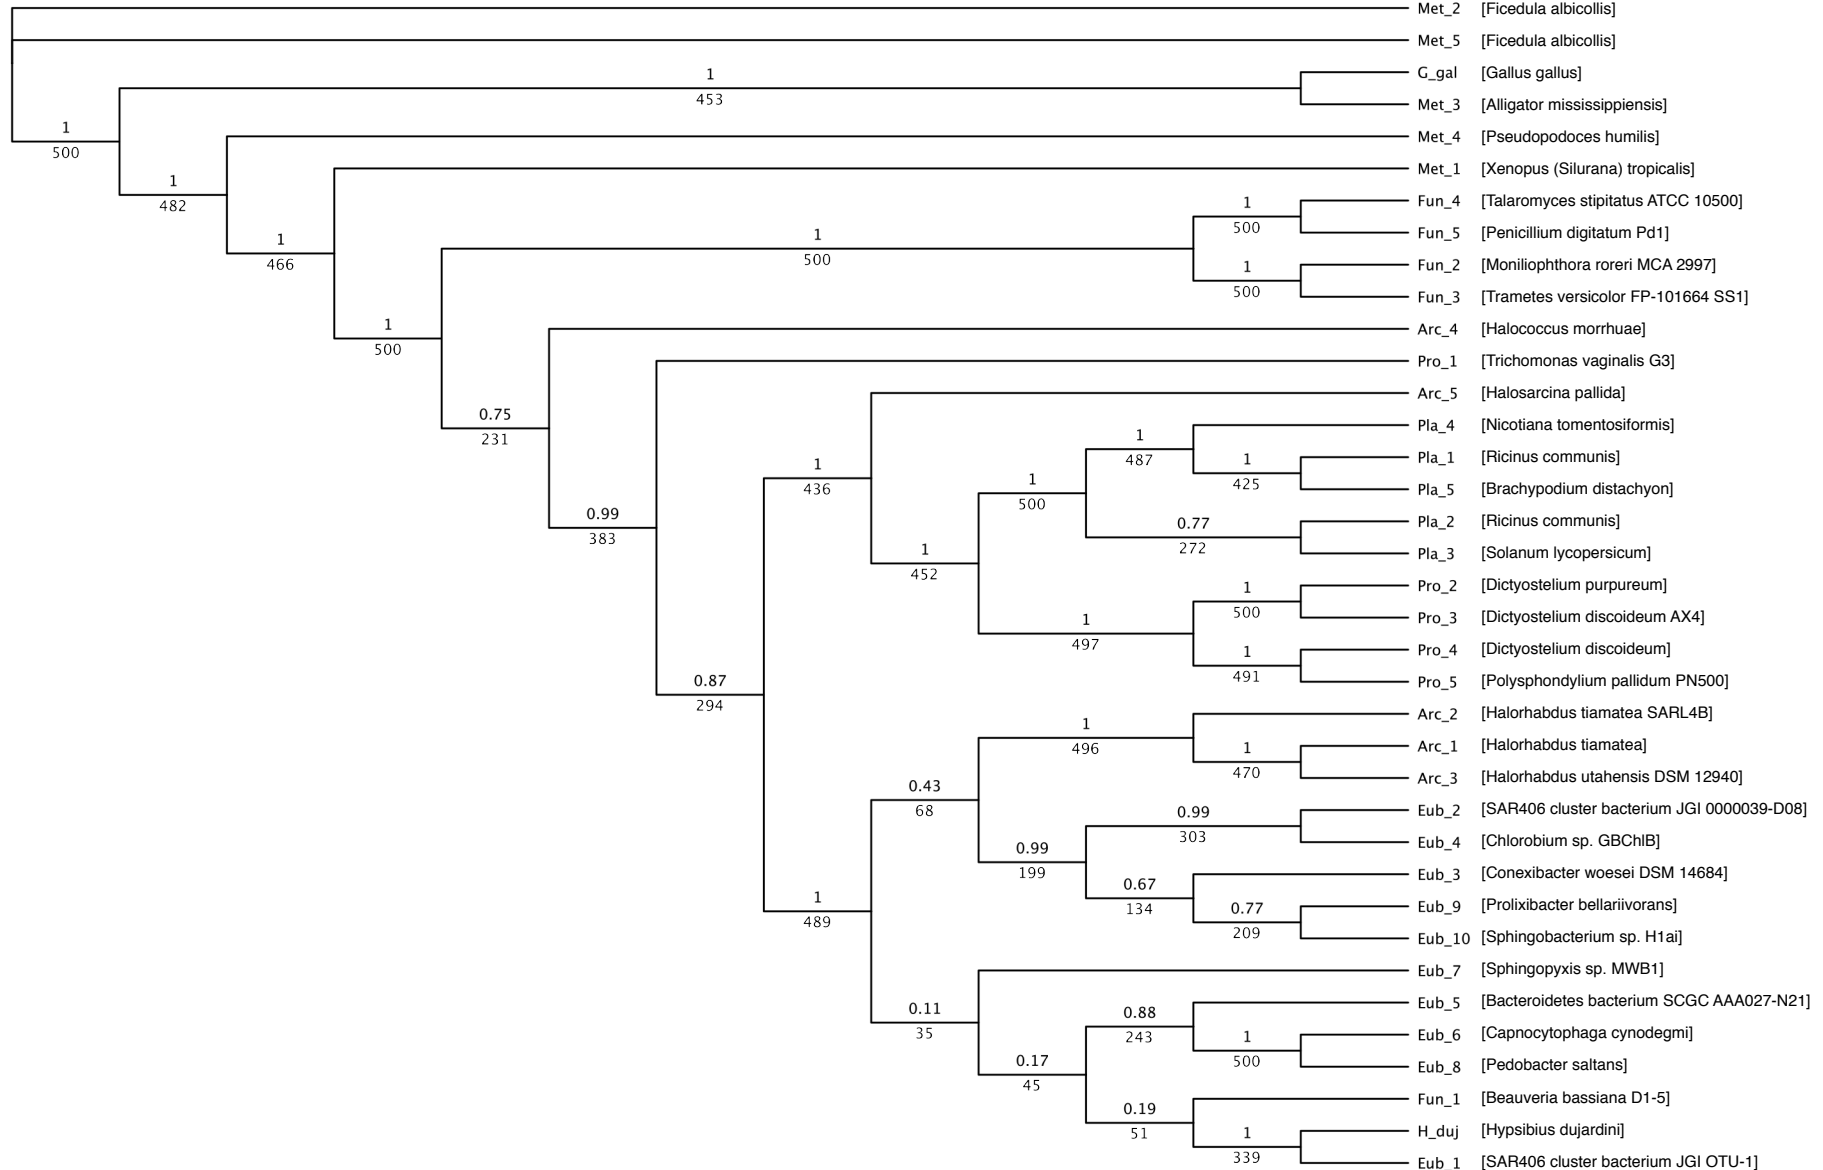

maker\_scaffold1707\_size25220\_snap\_gene\_0.20

hypothetical protein Osl\_22158

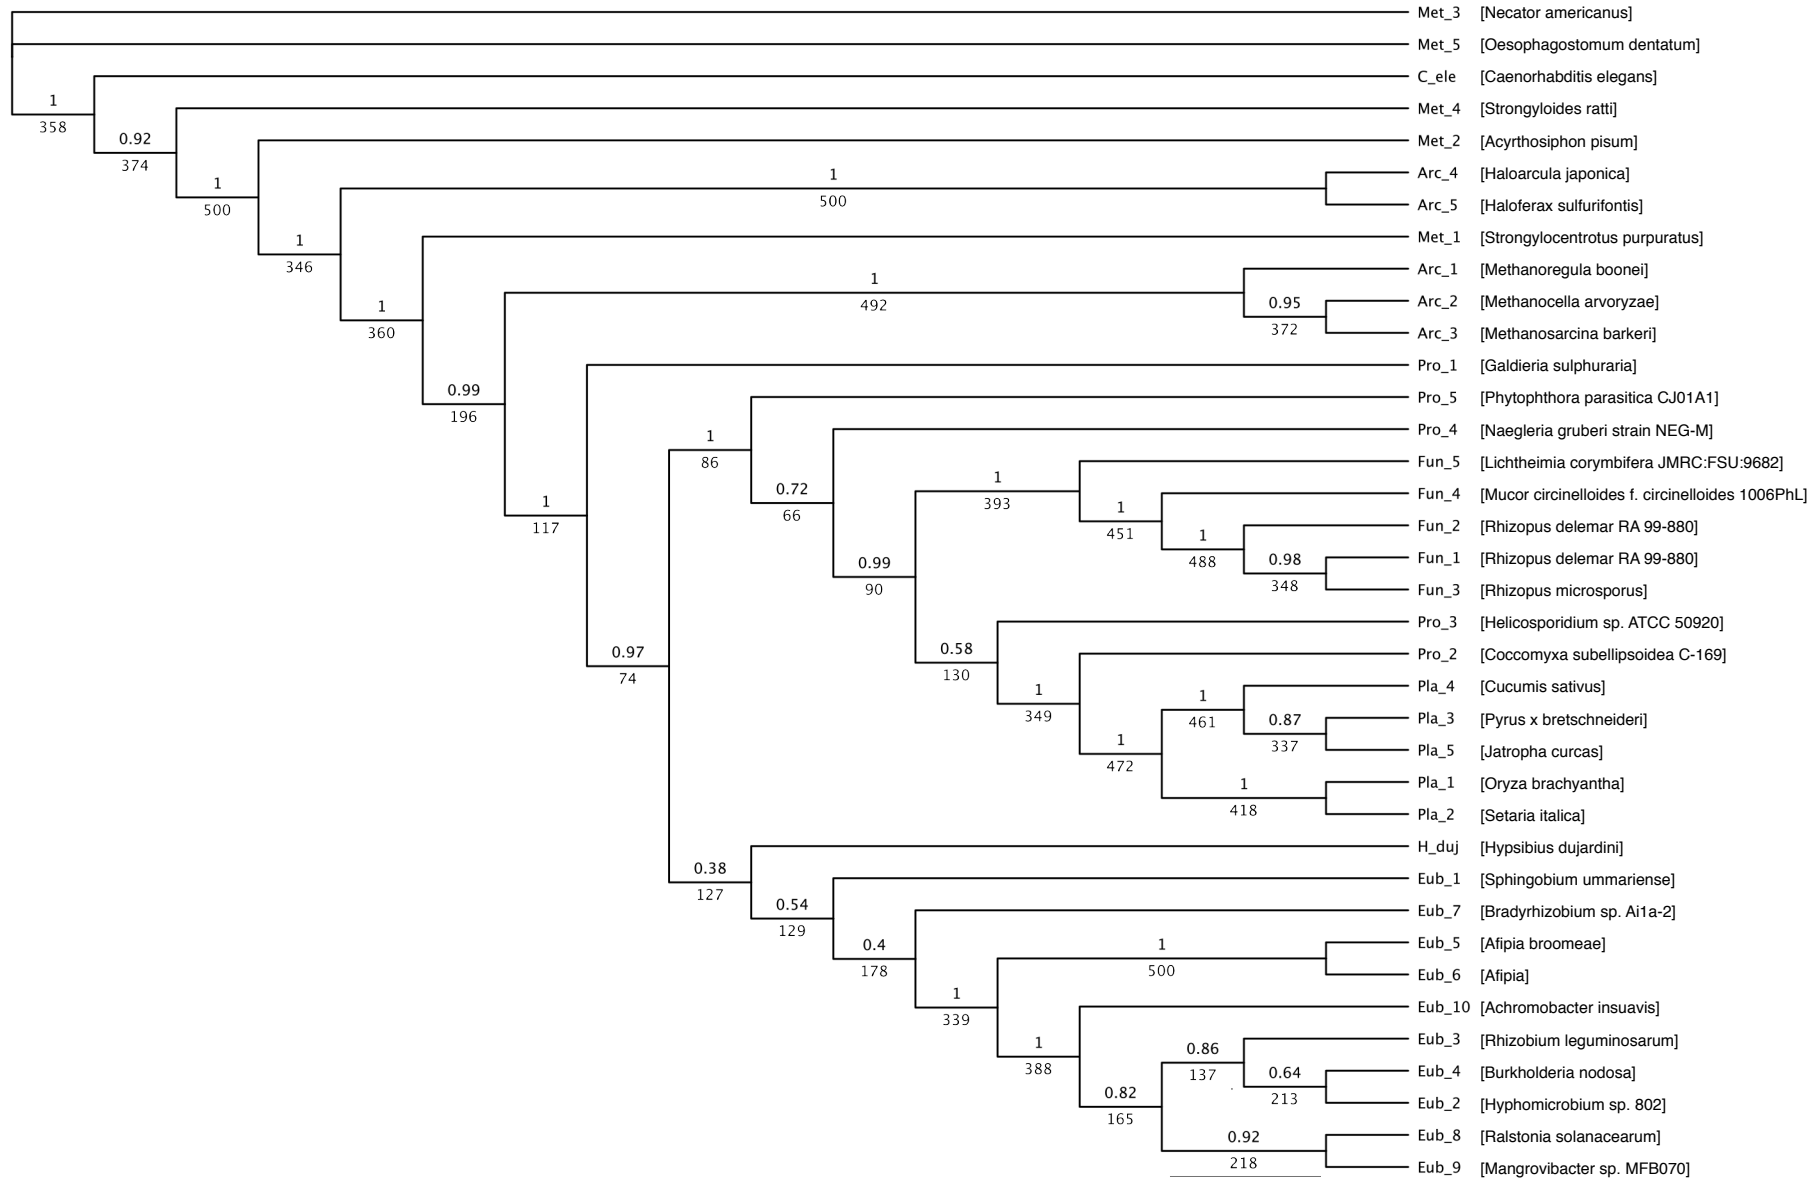



hypothetical protein

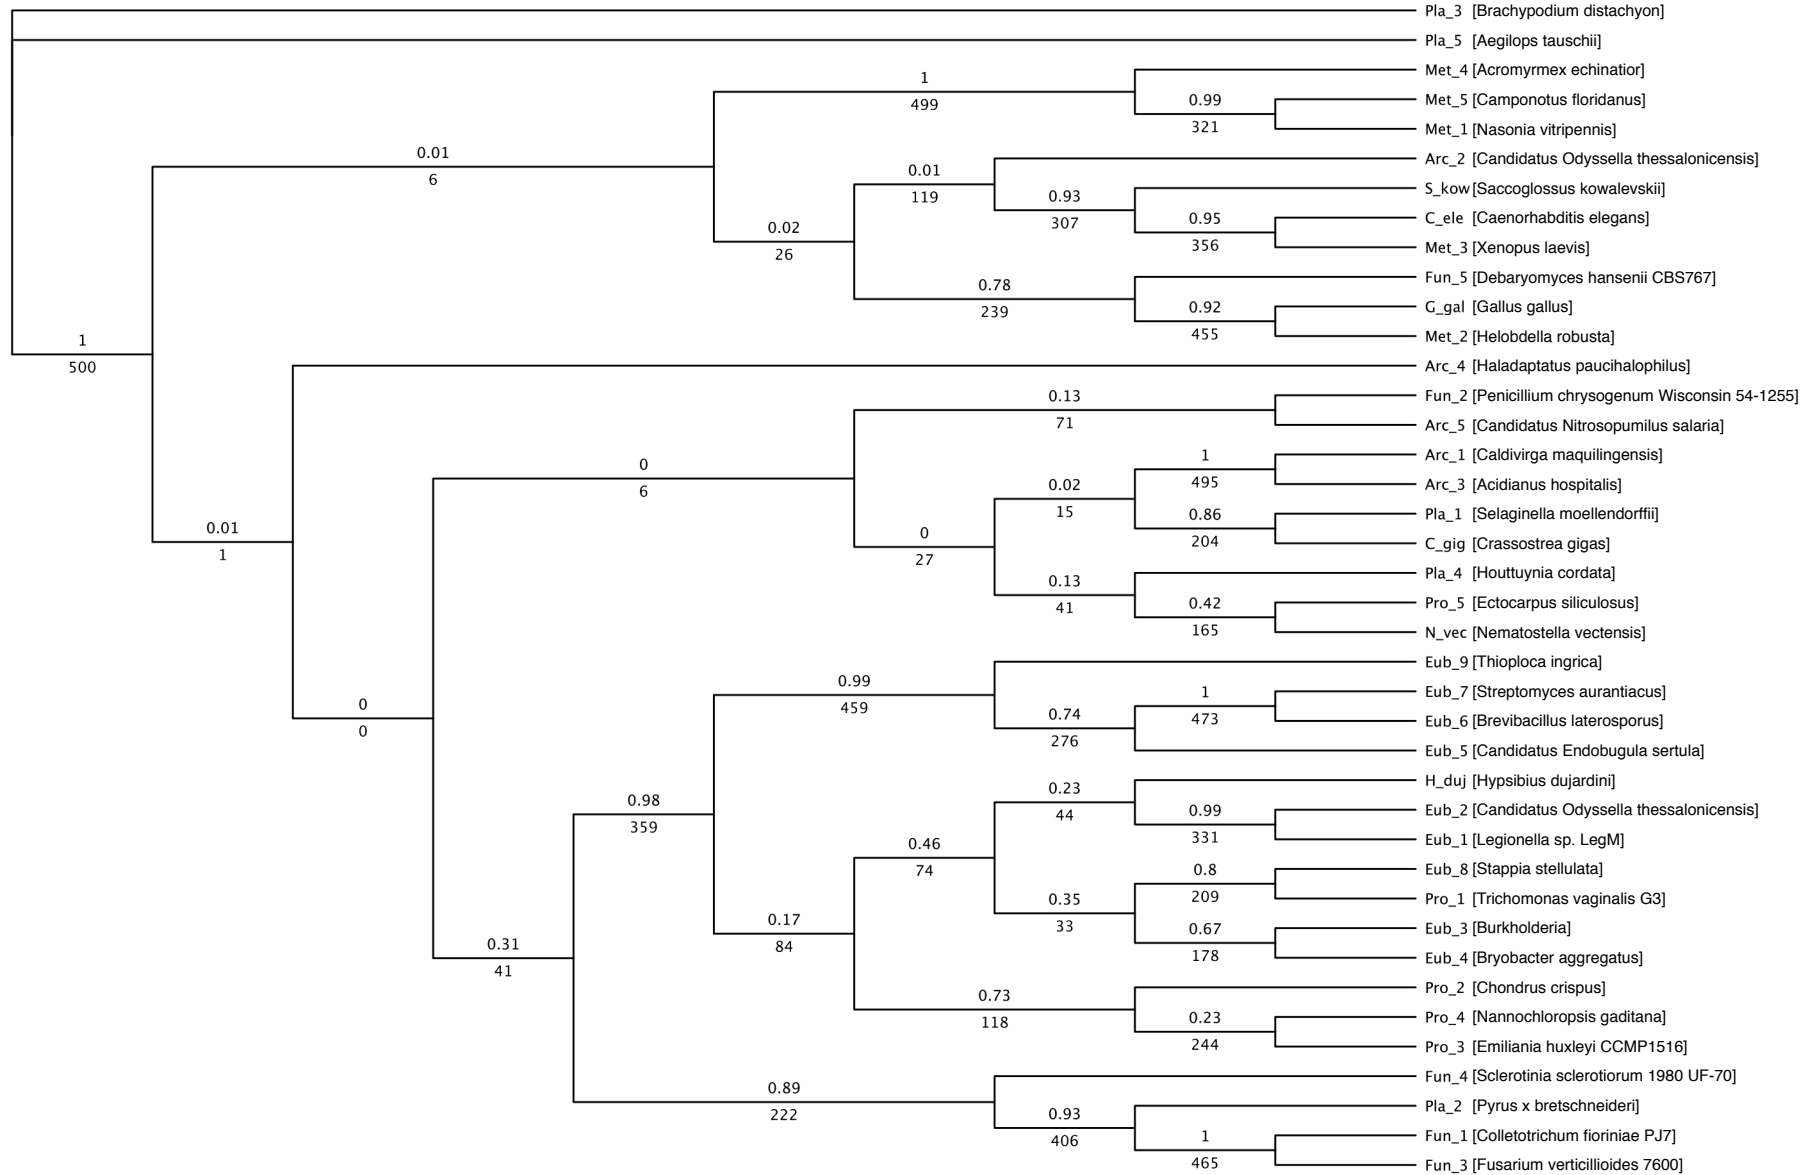

maker\_scaffold1372\_size1372\_augustus\_gene\_0.18

hypothetical protein RLEG12\_03210

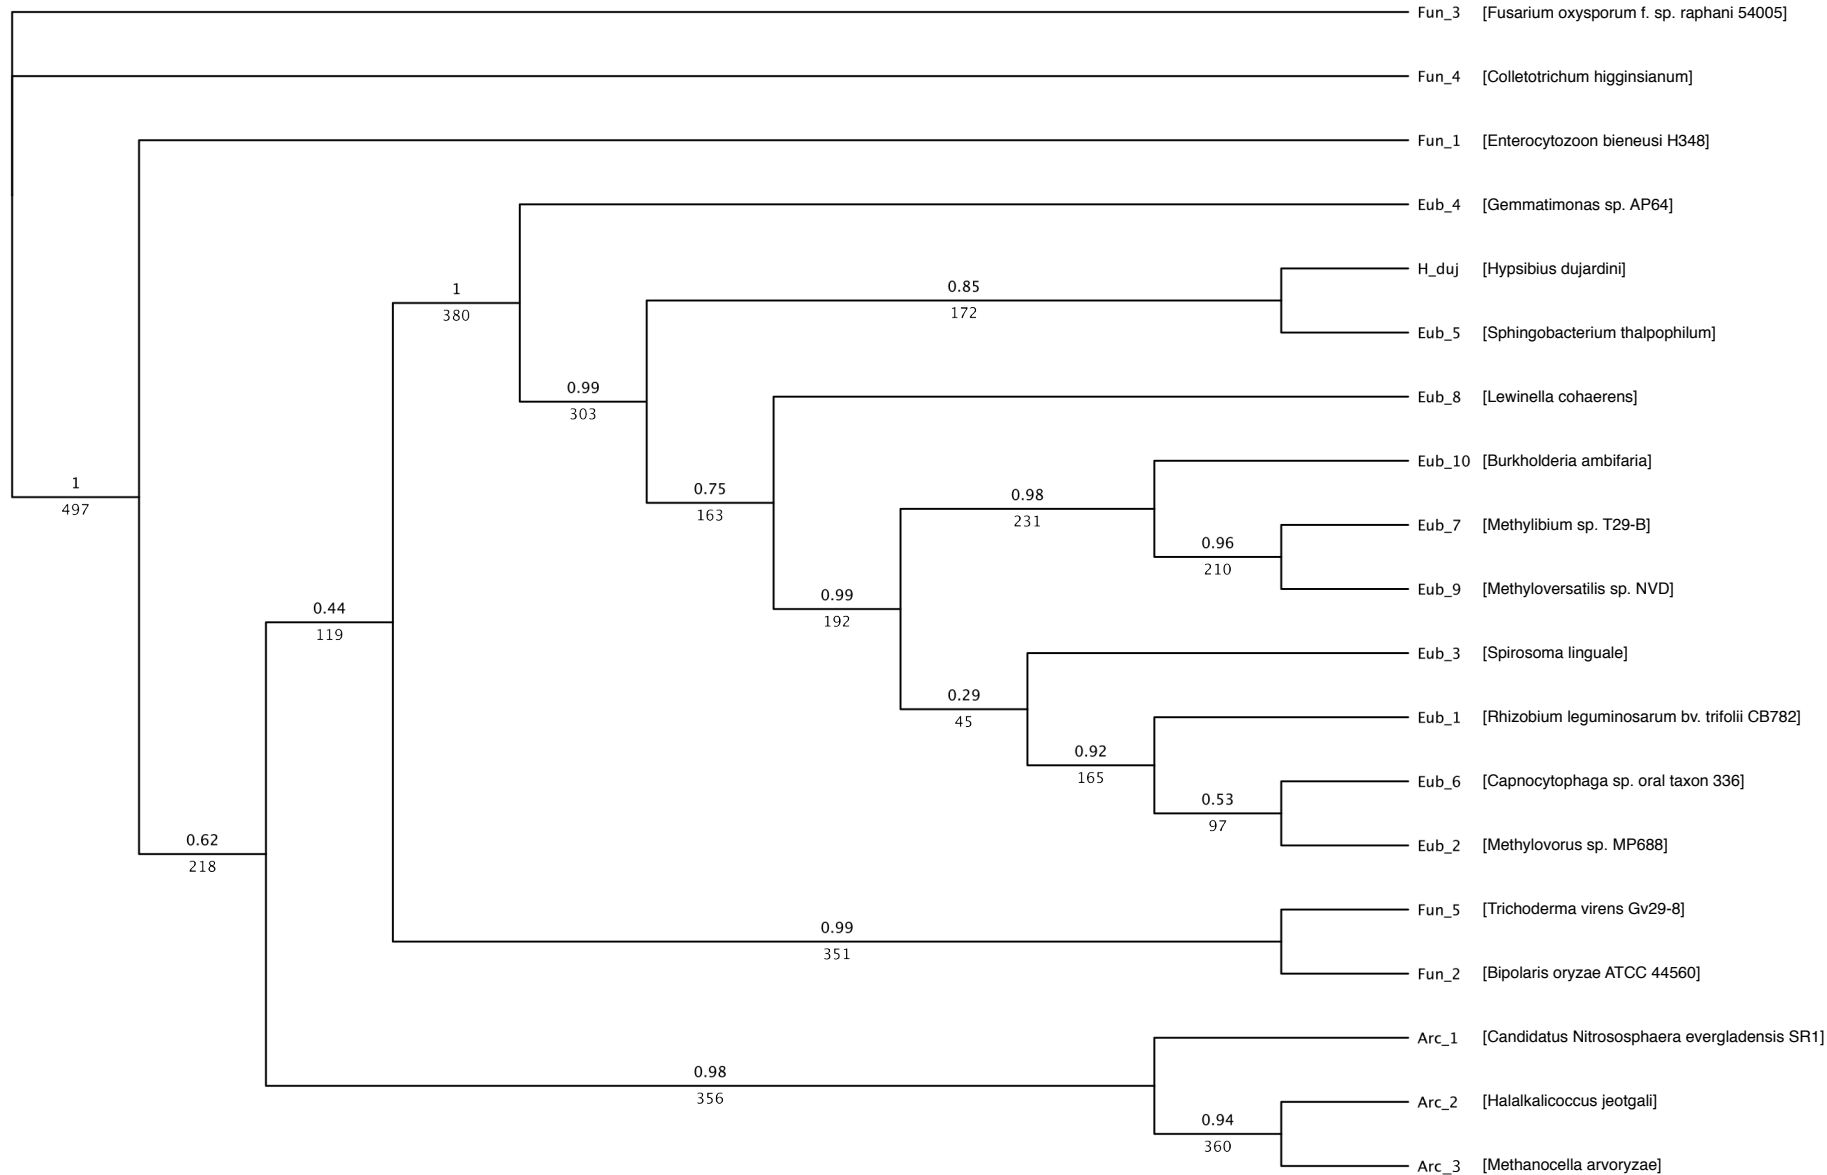

acetyl-CoA carboxylase subunit alpha

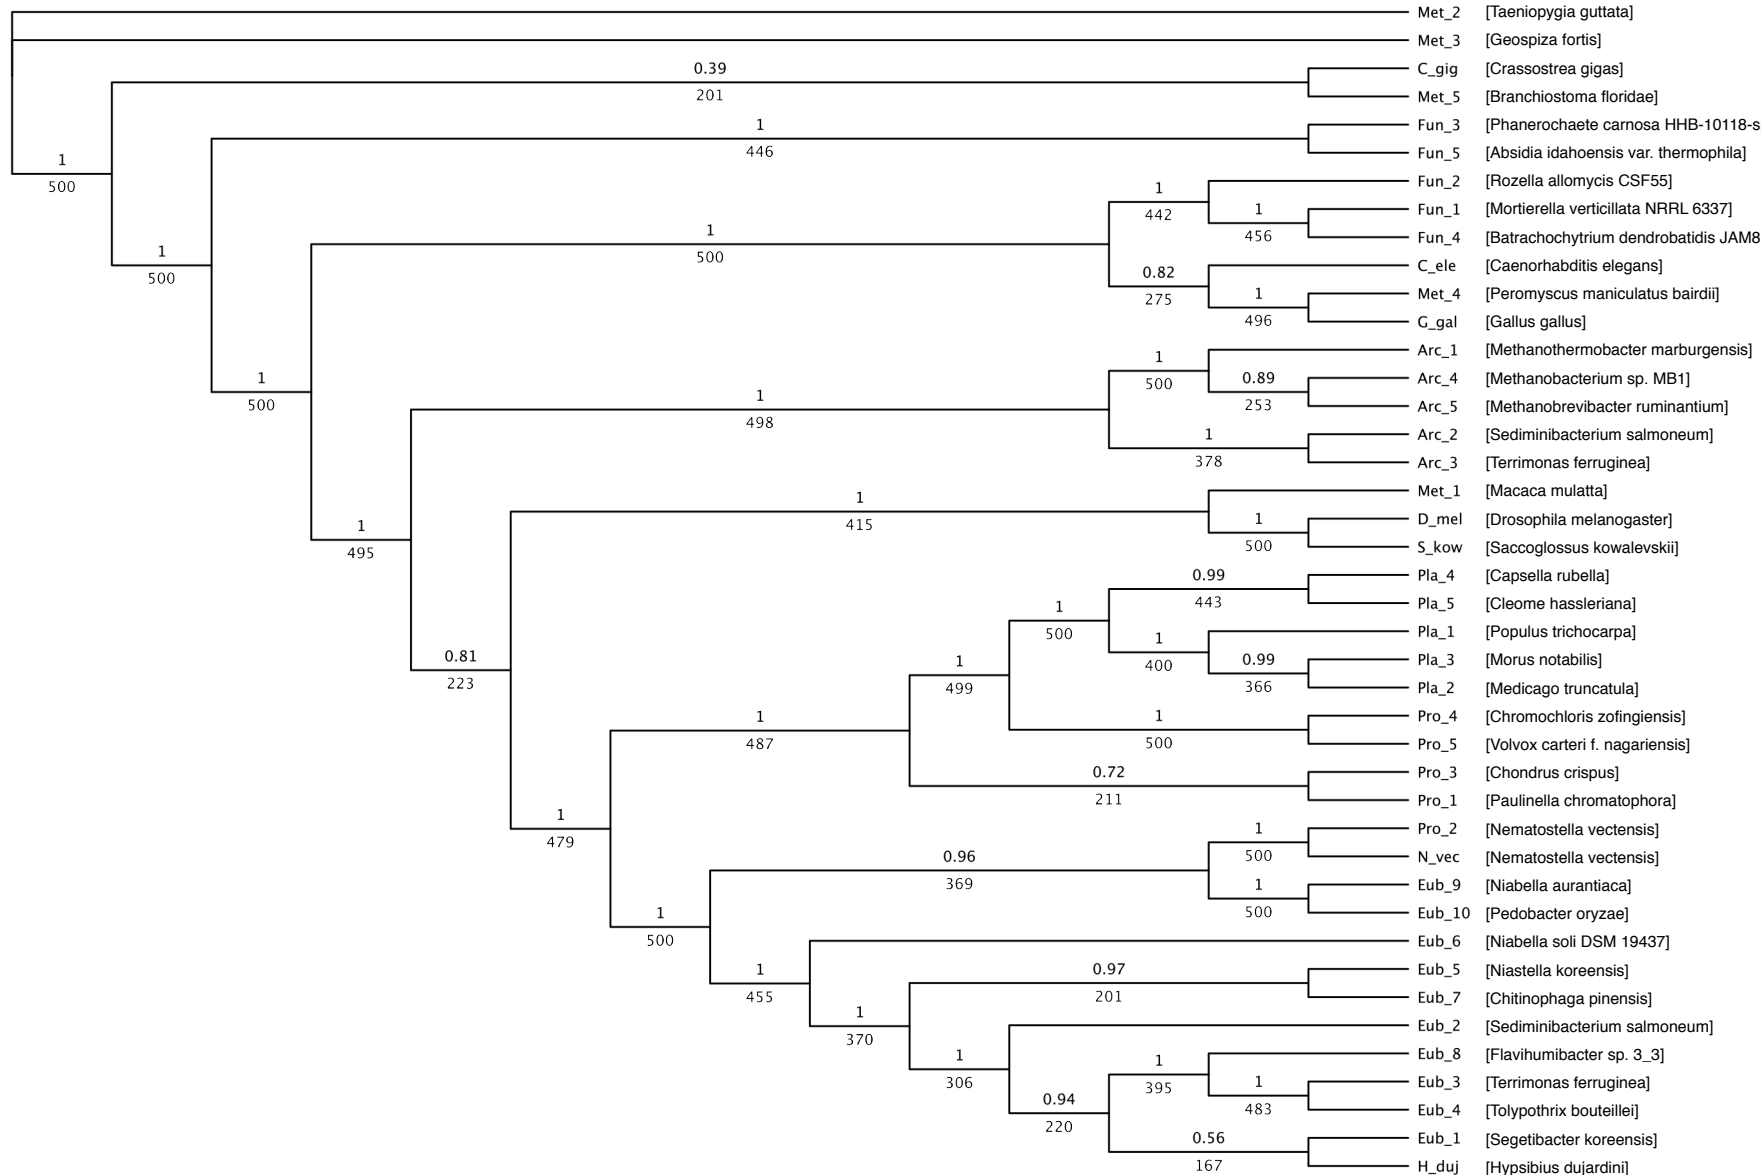

maker\_scaffold1218\_augustus\_gene\_0.15

hypothetical protein

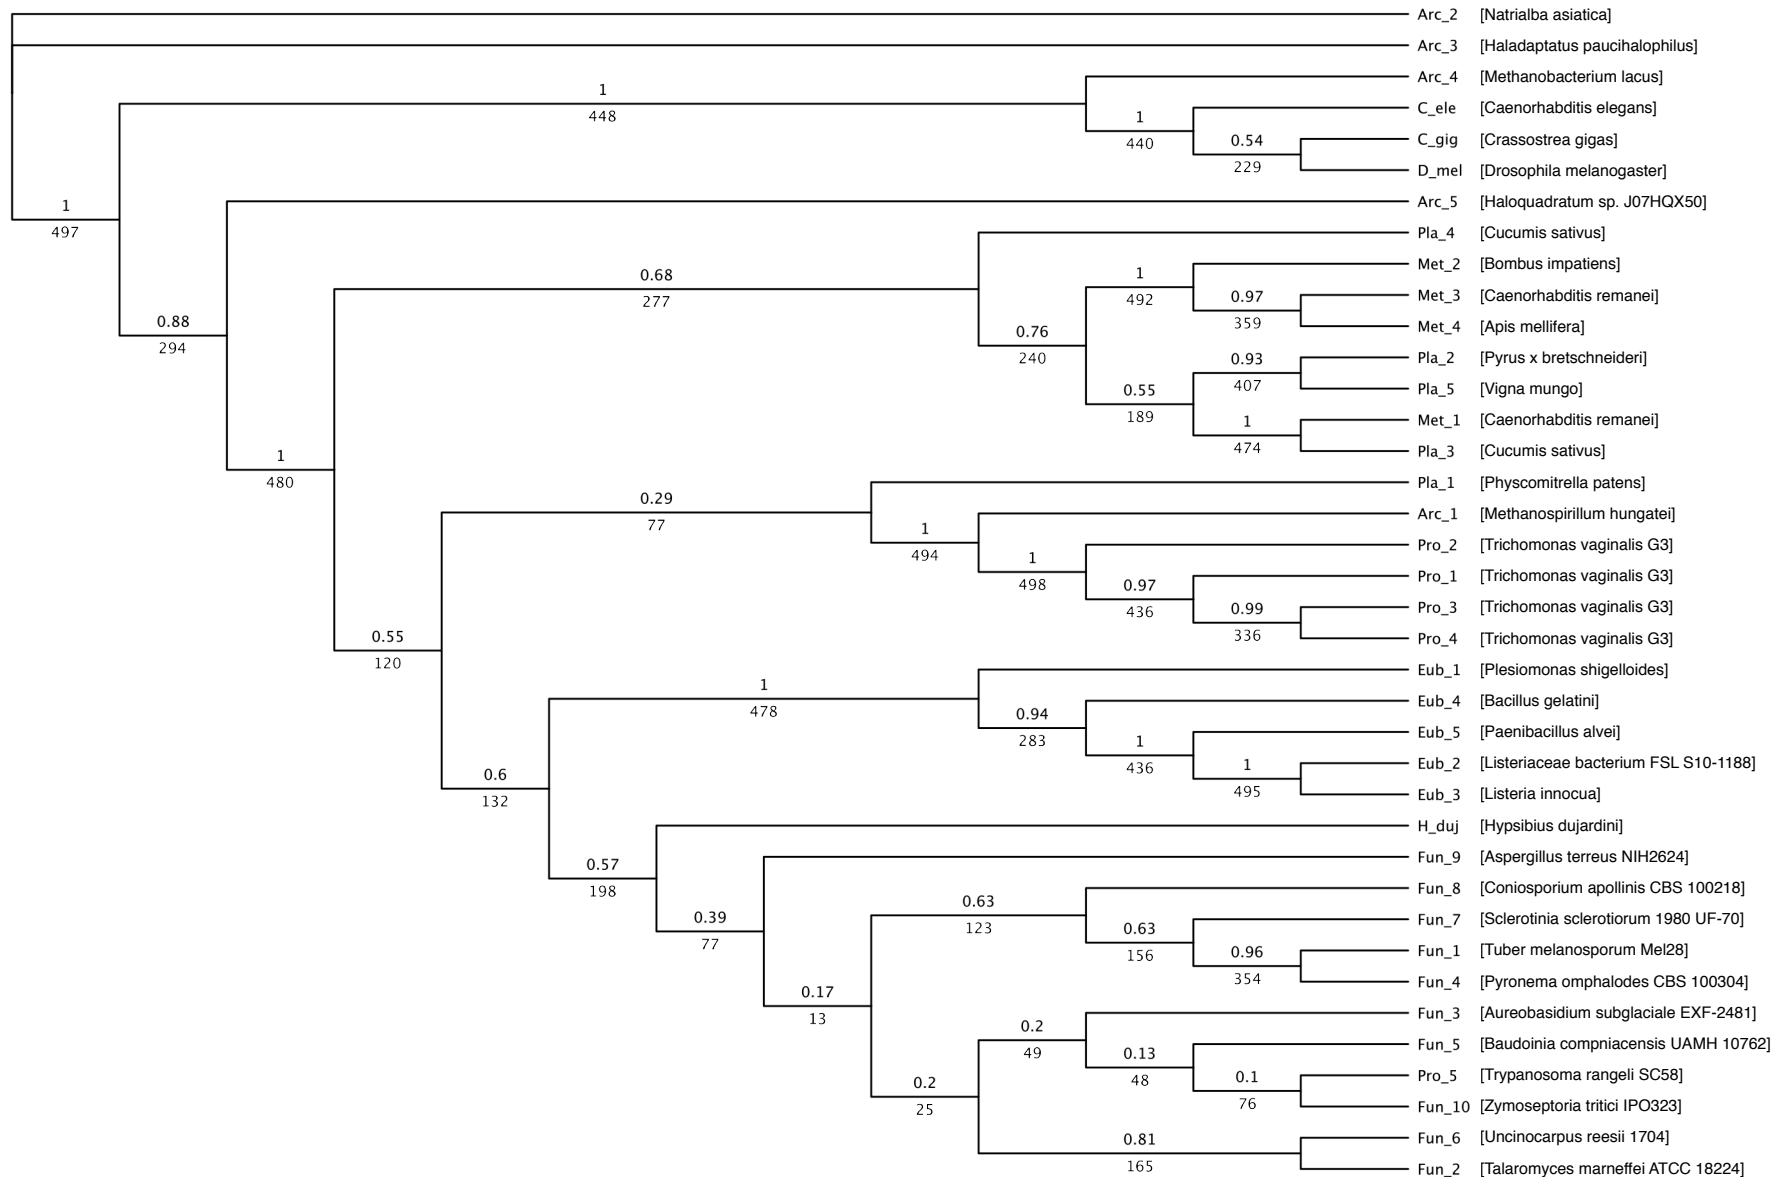

maker\_scaffold1195\_size29765\_augustus\_gene\_0.13  
hypothetical protein

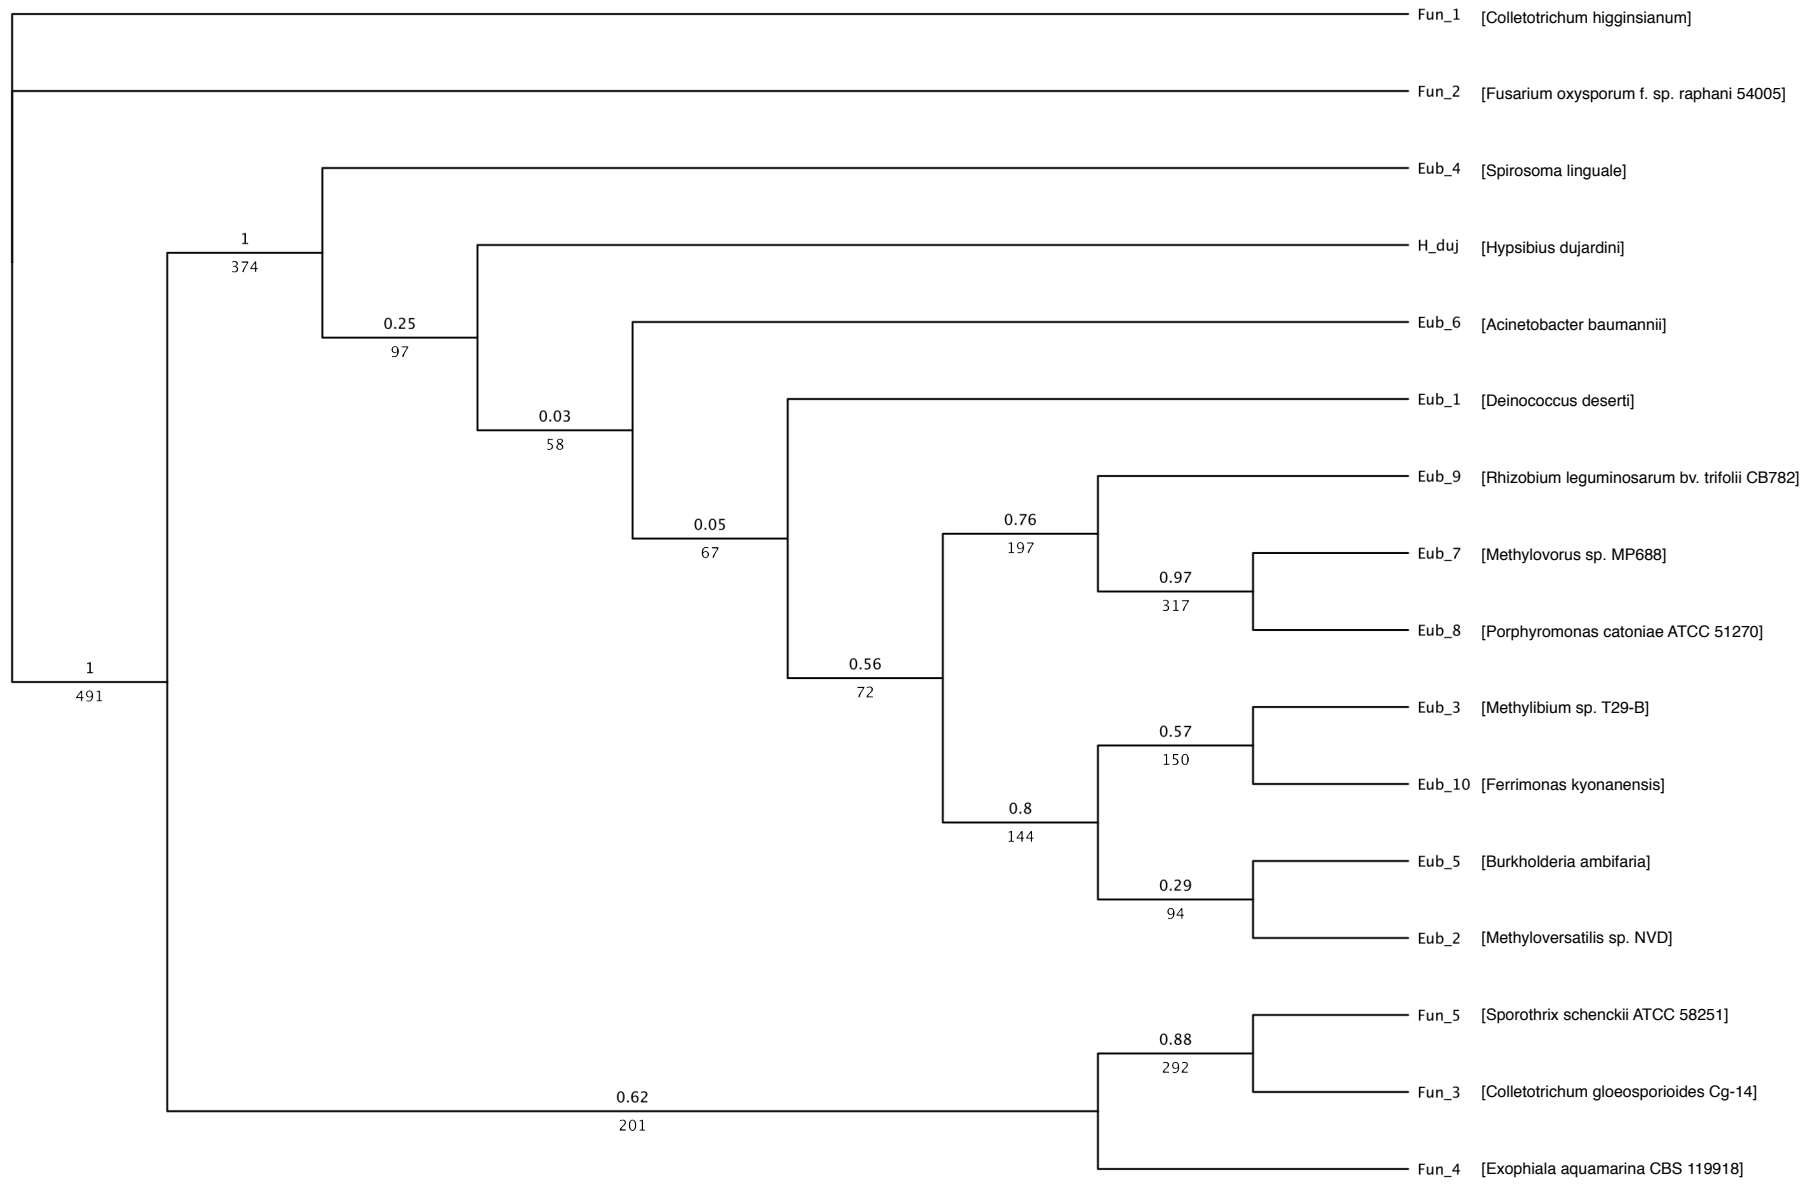

maker\_scaffold1114\_snap\_gene\_0.20  
 hypothetical protein BATDEDRAFT\_8747

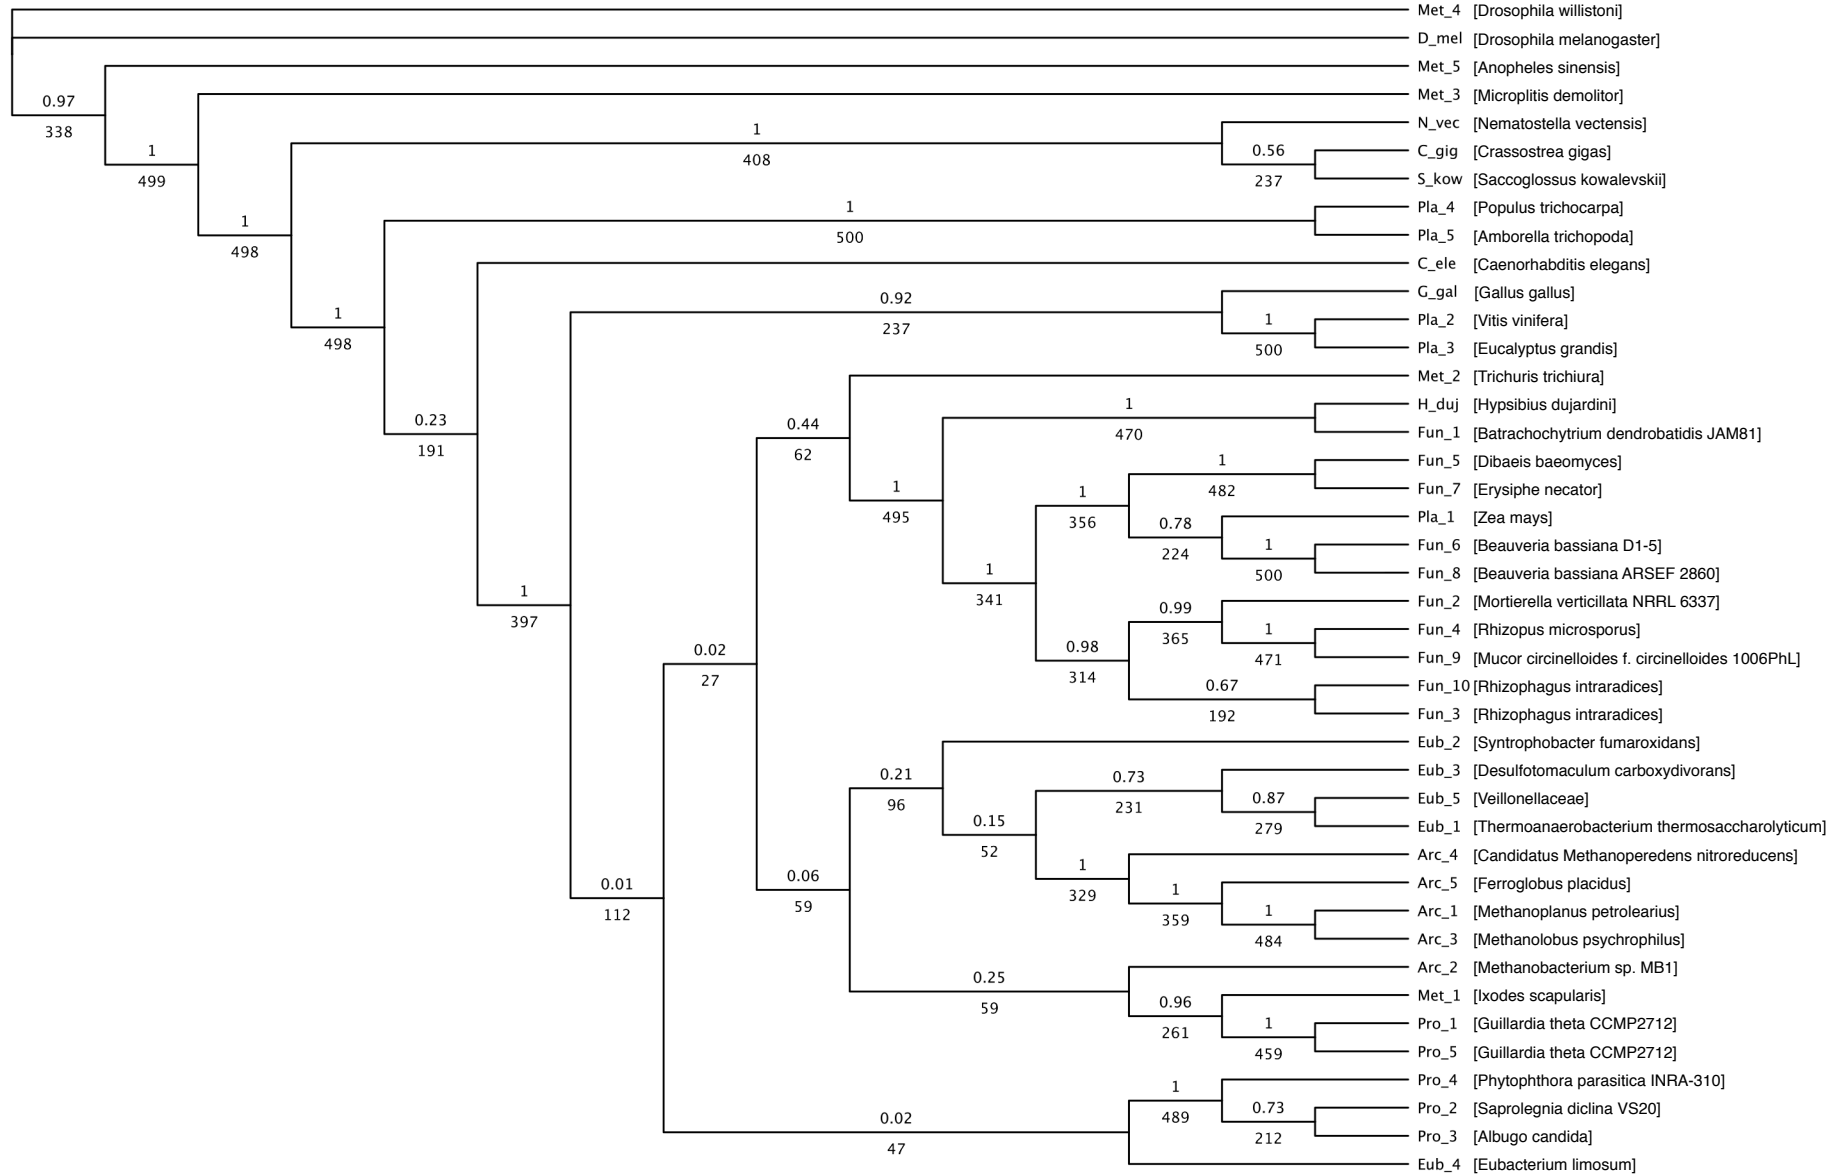

maker\_scaffold1034\_snap\_gene\_0.53  
 ABC-type branched-chain amino acid transport syster

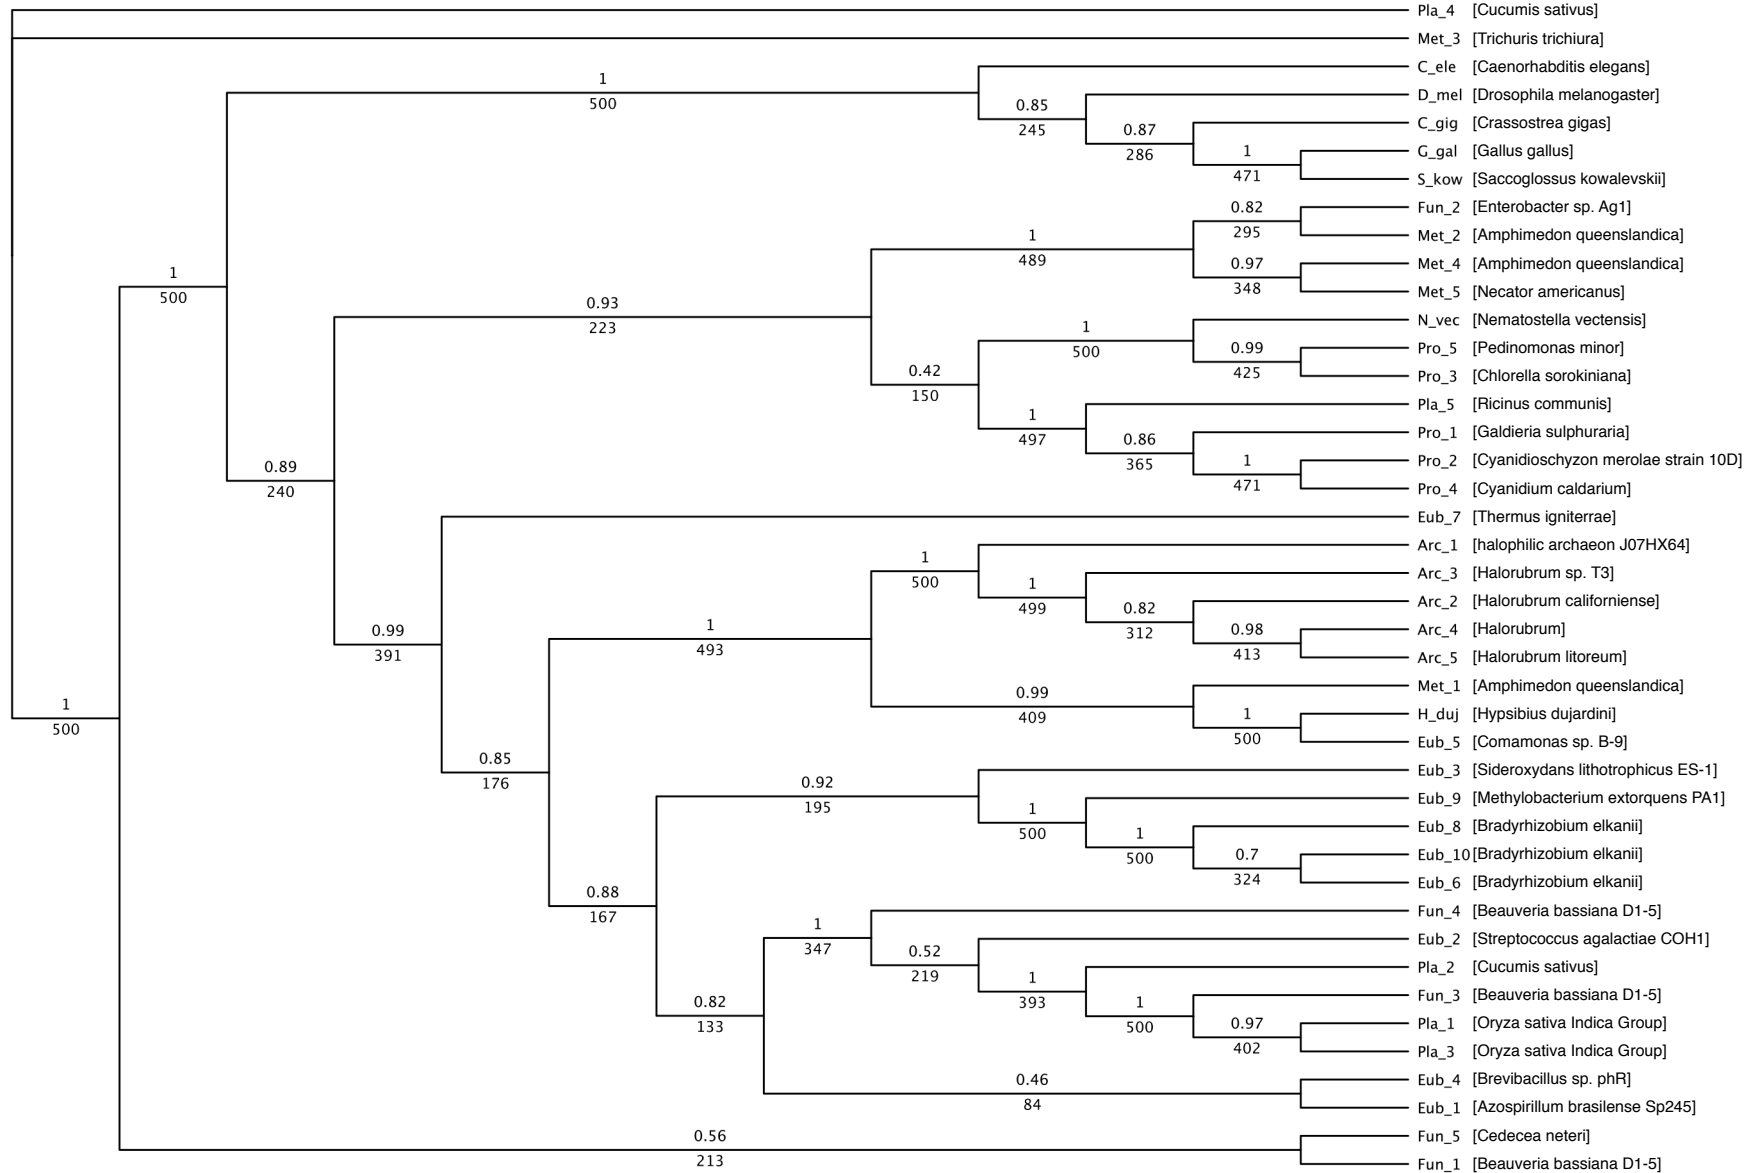

maker\_scaffold962\_size32525\_snap\_gene\_0.37  
DOPA-dioxygenase-related protein

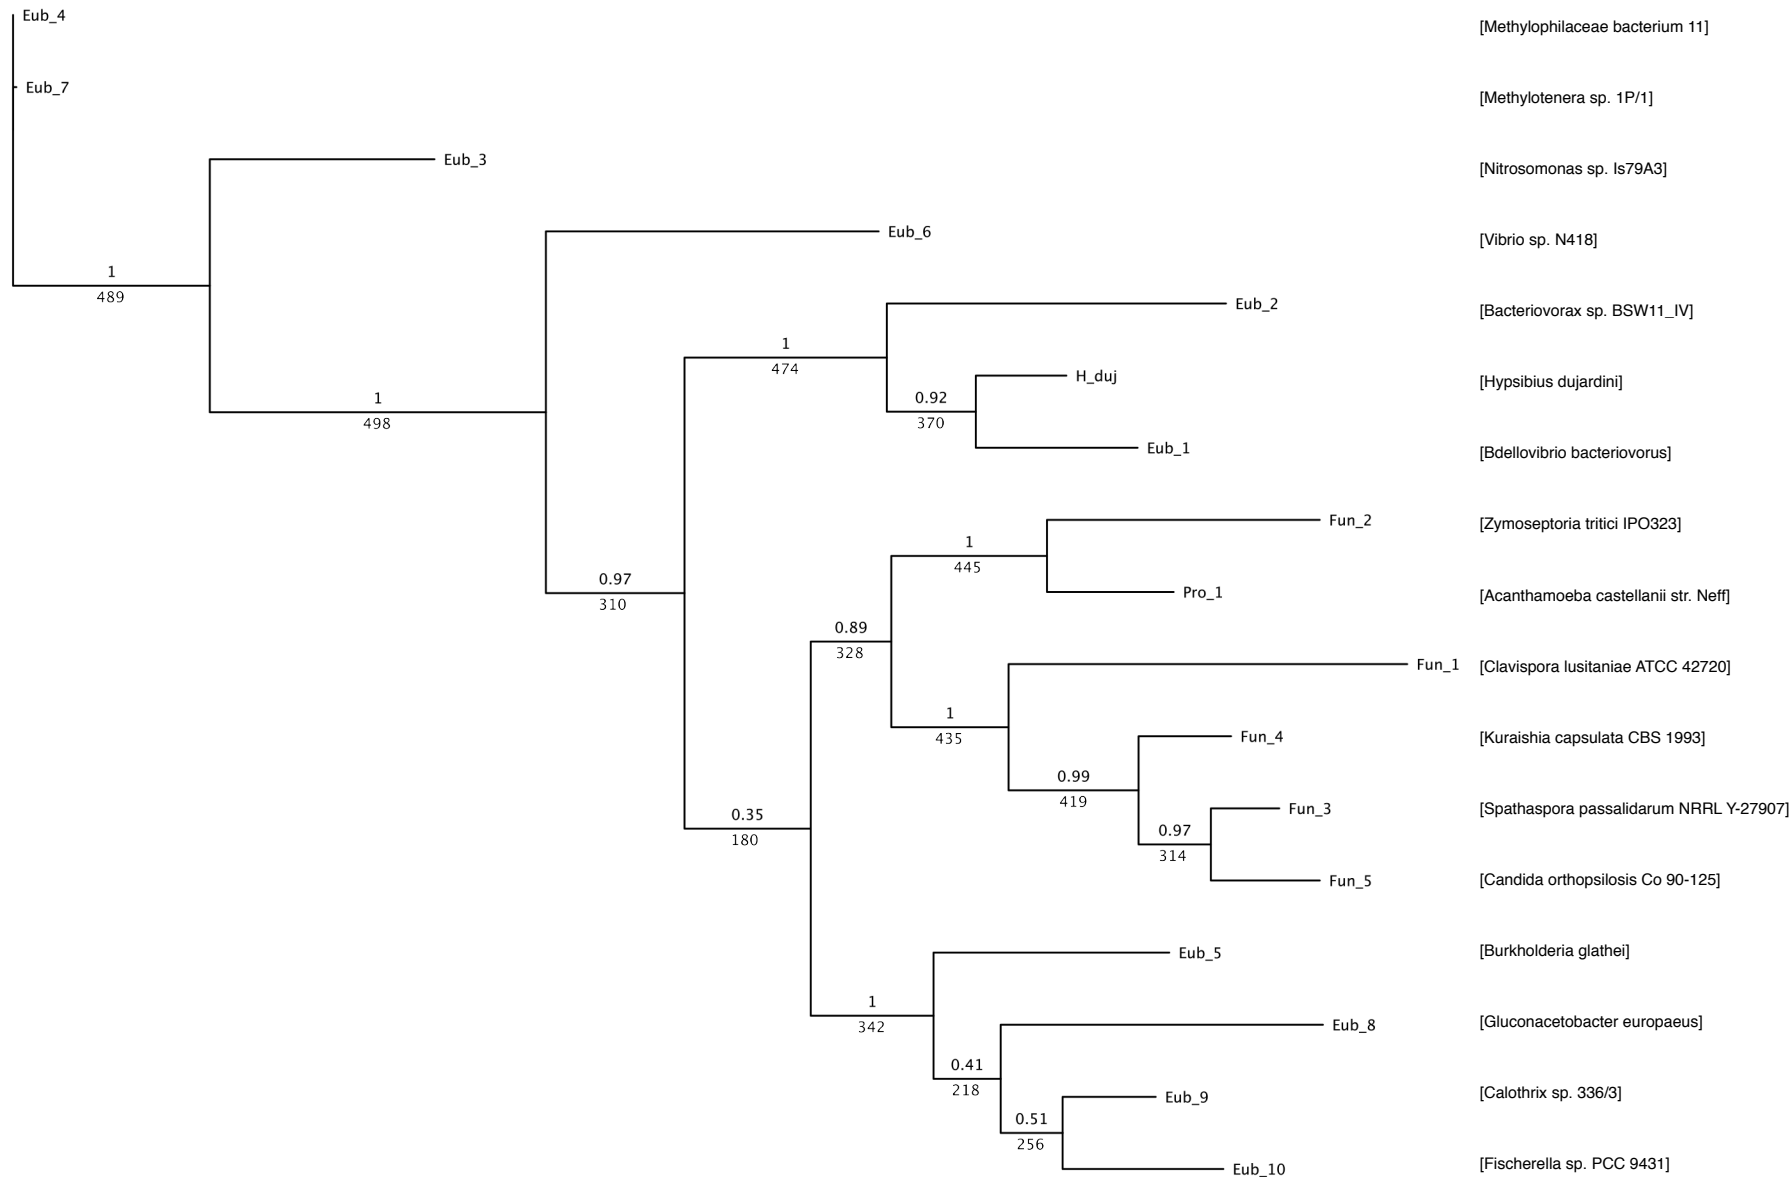



ABC transporter ATP-binding protein

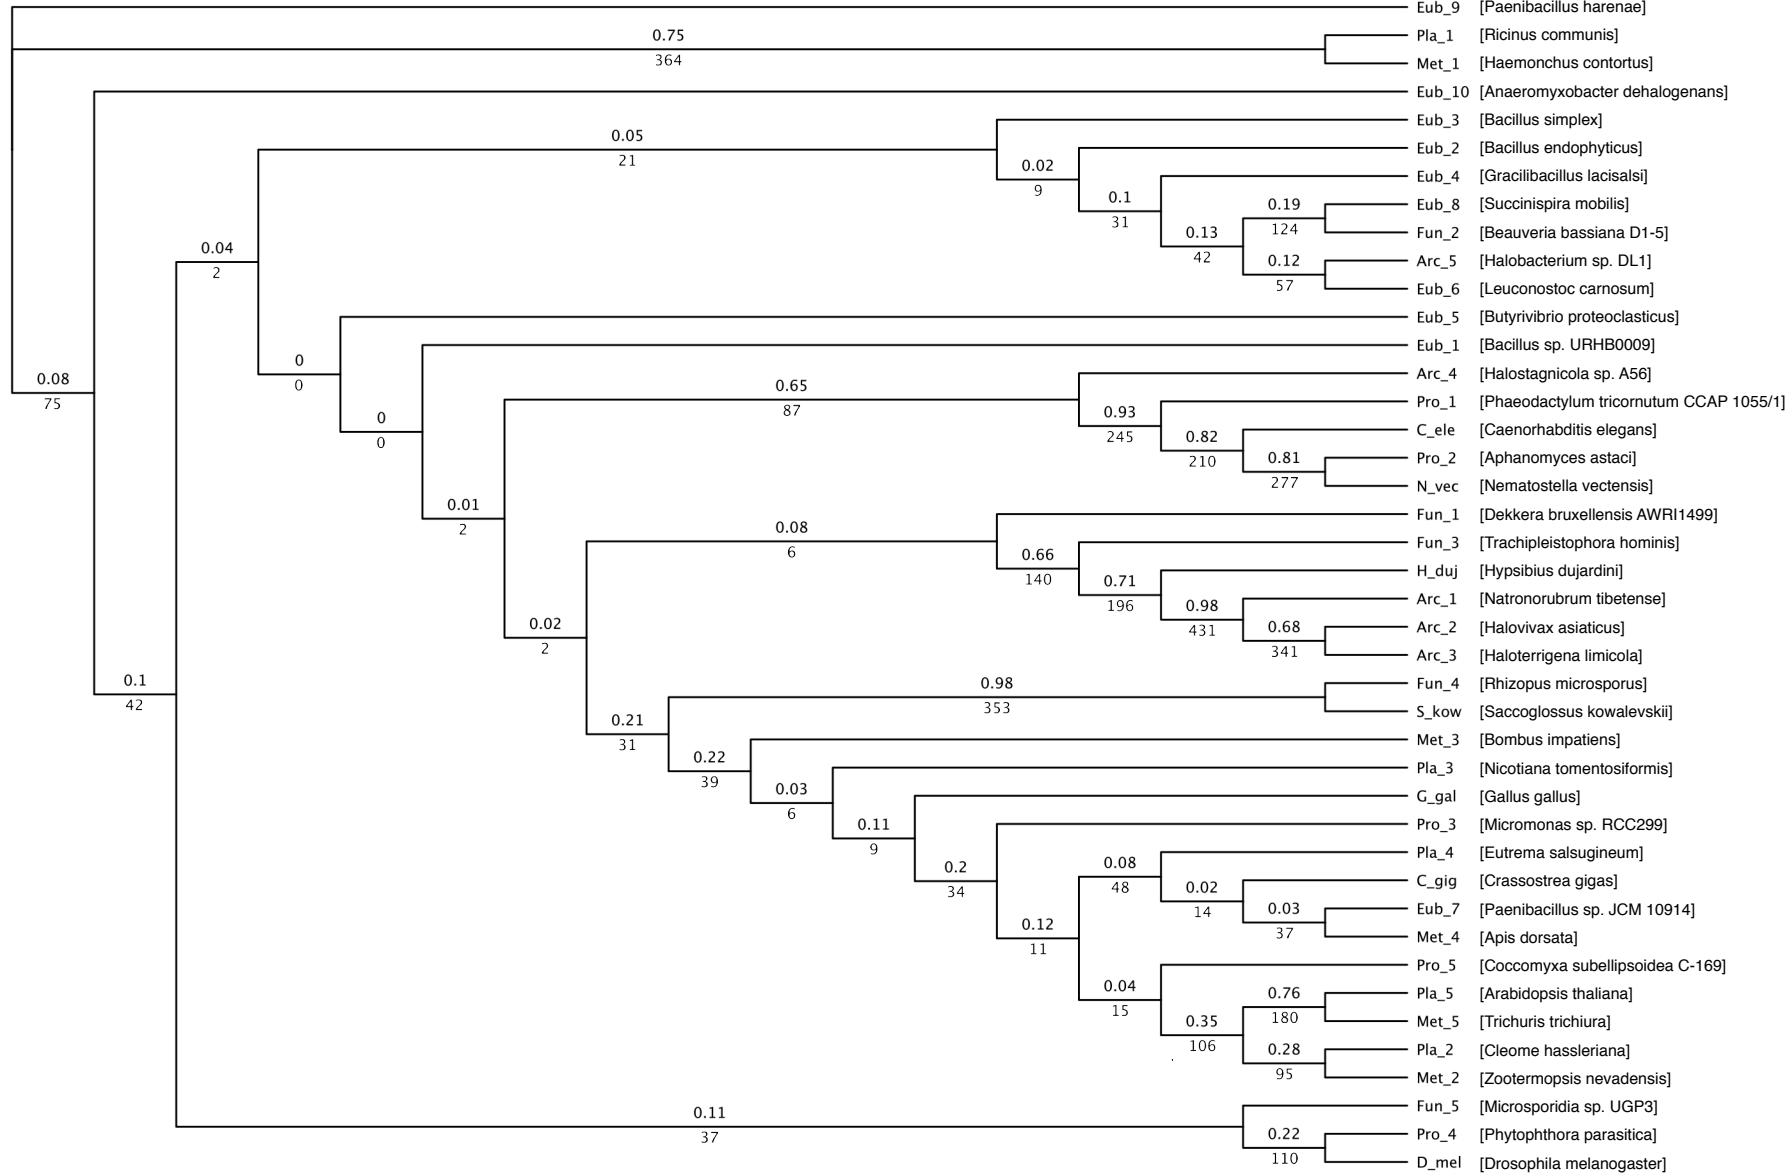

maker\_scaffold749\_size36498\_snap\_gene\_0.17

# Adenosylmethionine-8-amino-7-oxononanoate aminotransferase

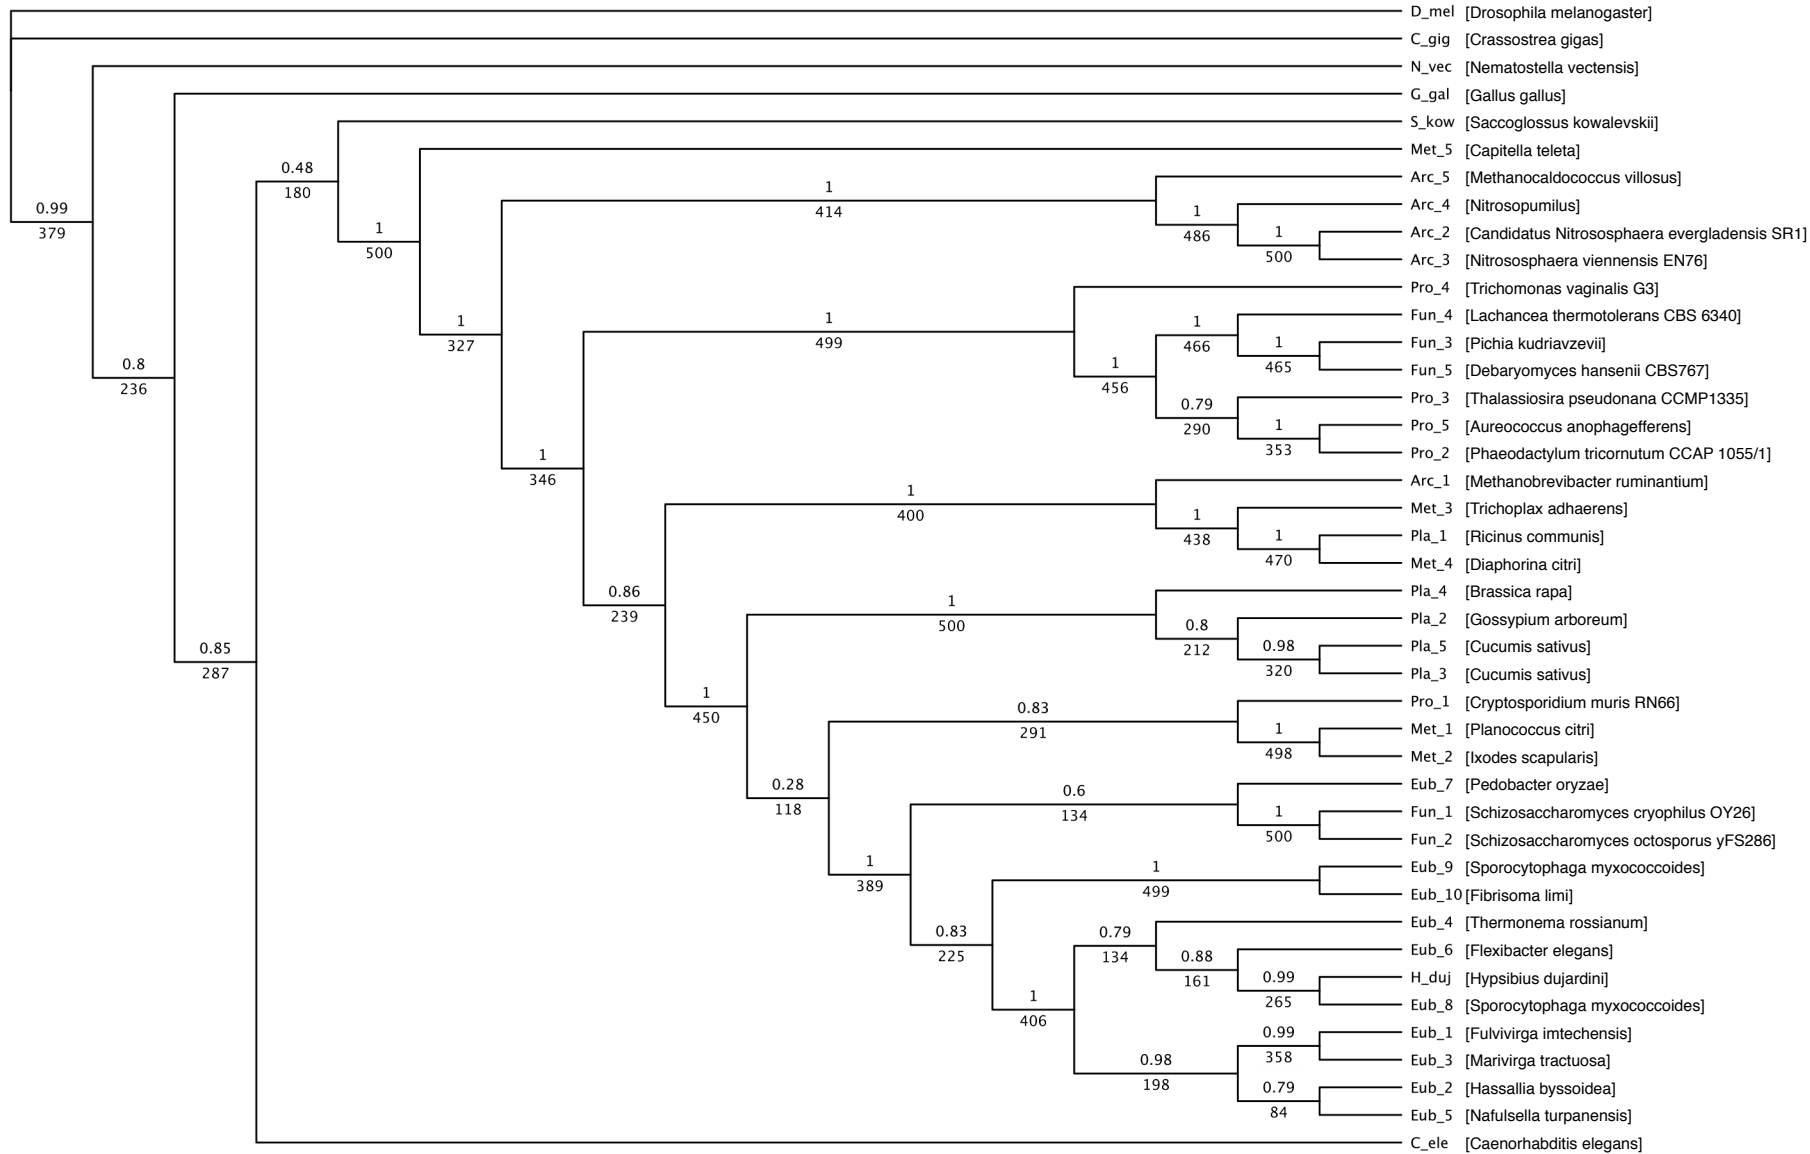

maker\_scaffold741\_size41061\_snap\_gene\_0.36

cyanate hydratase

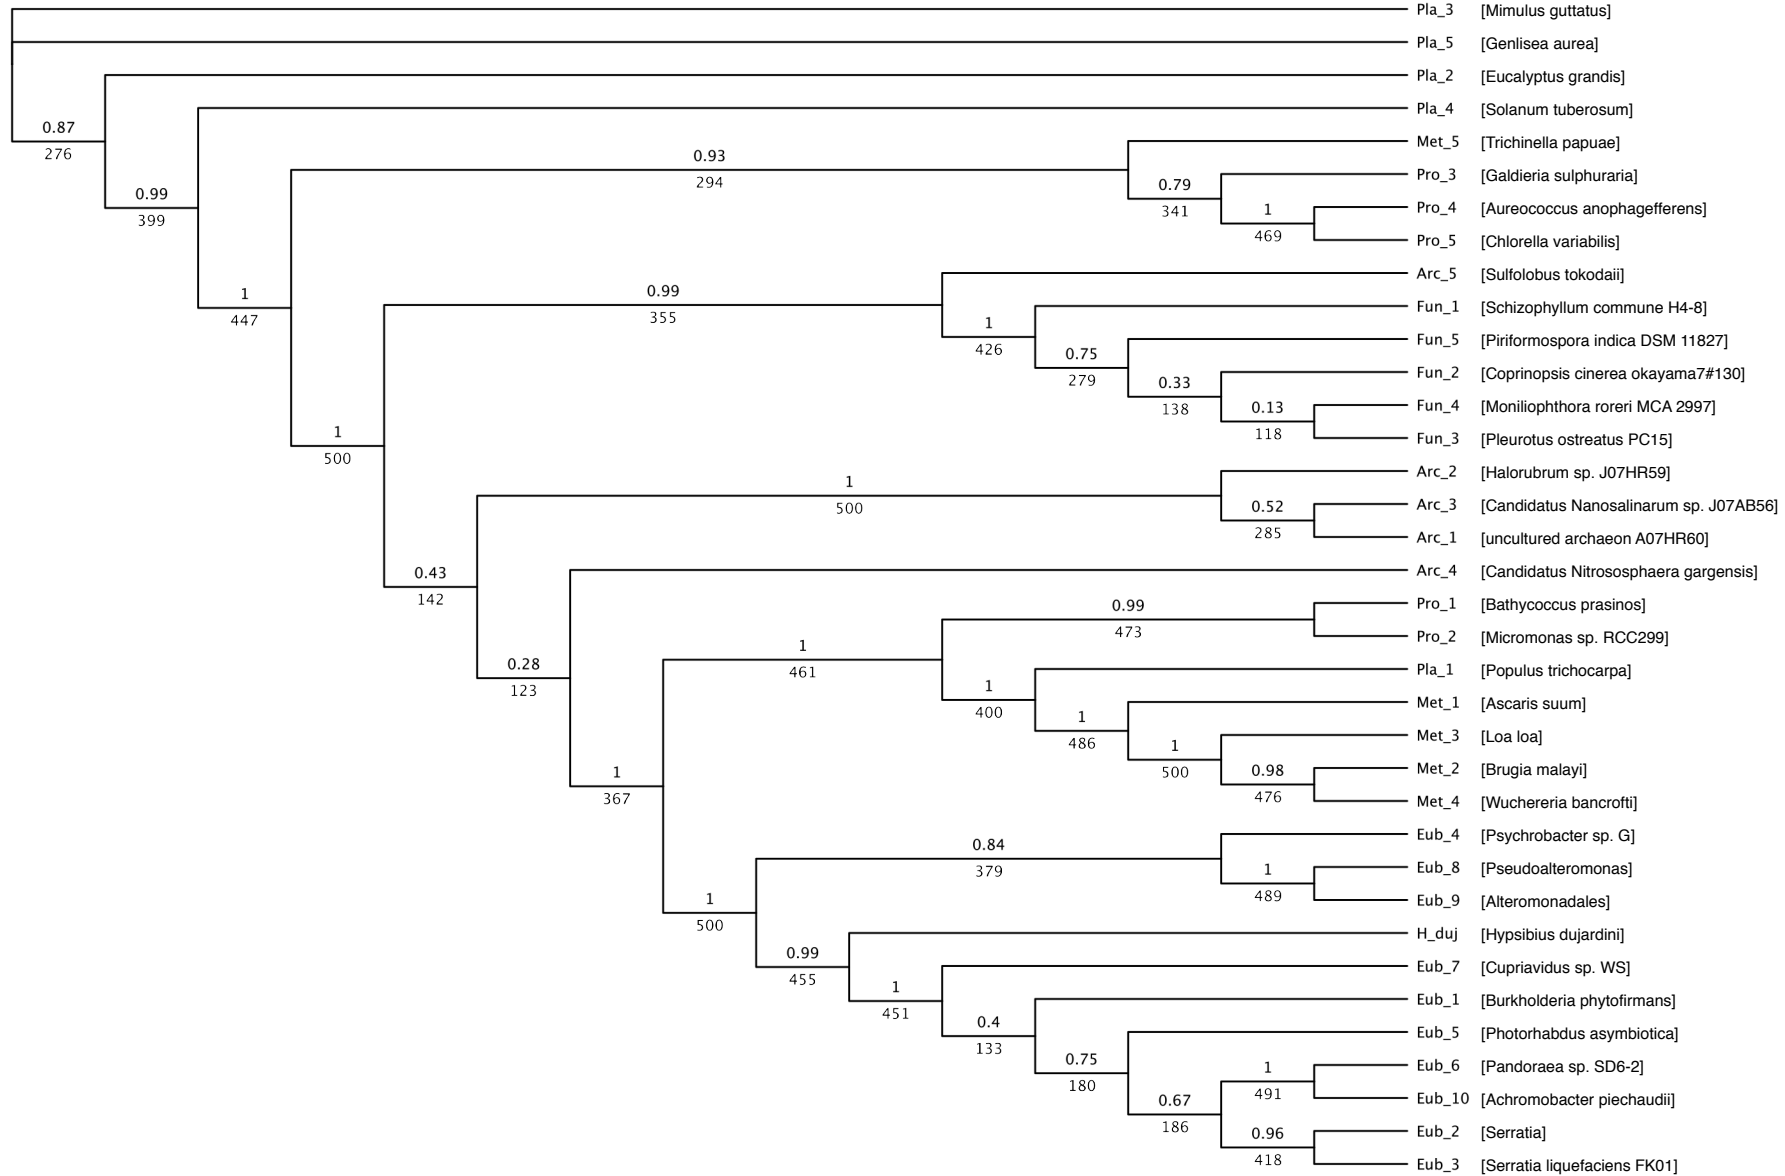

maker\_scaffold714\_size37228\_augustus\_gene\_0.11

acetylglucosaminyltransferase/ transferase

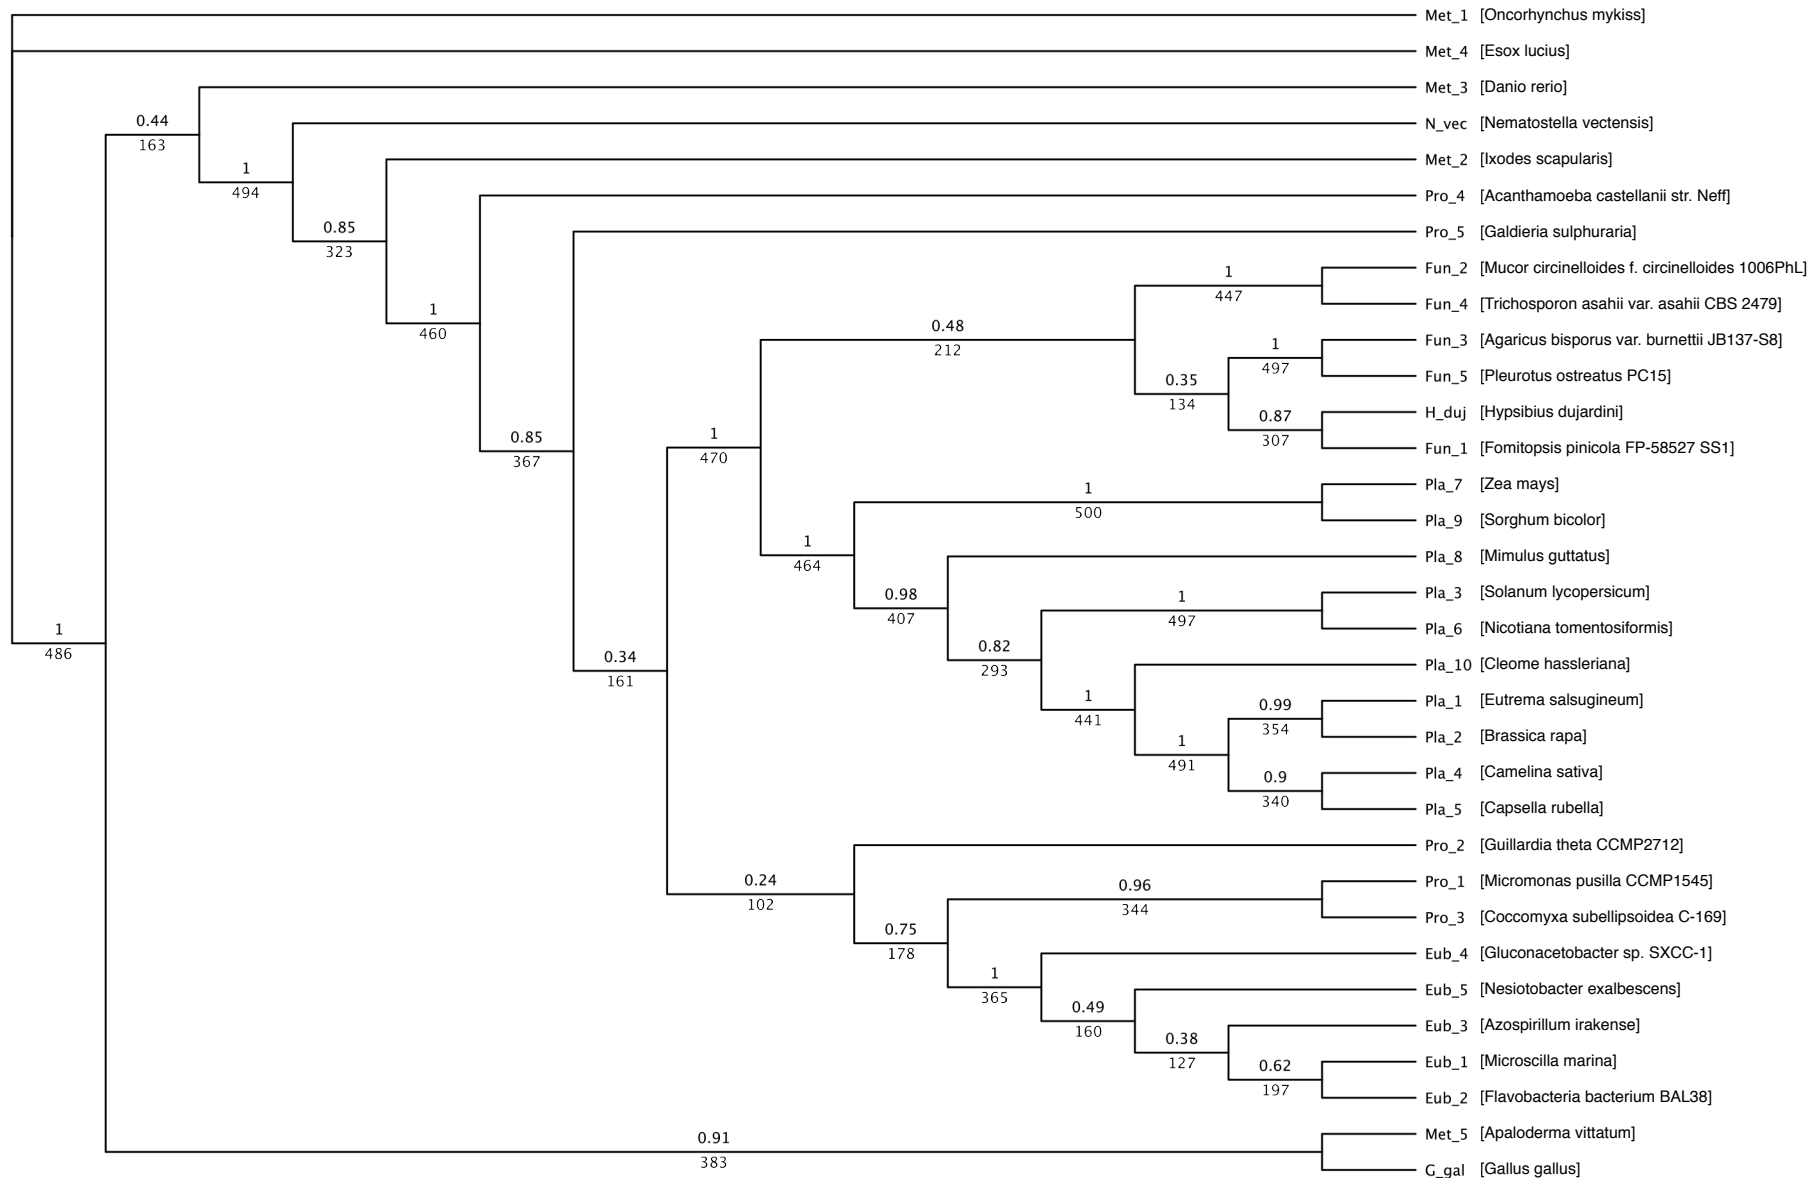

maker\_scaffold668\_size38133\_augustus\_gene\_0.18

hypothetical protein

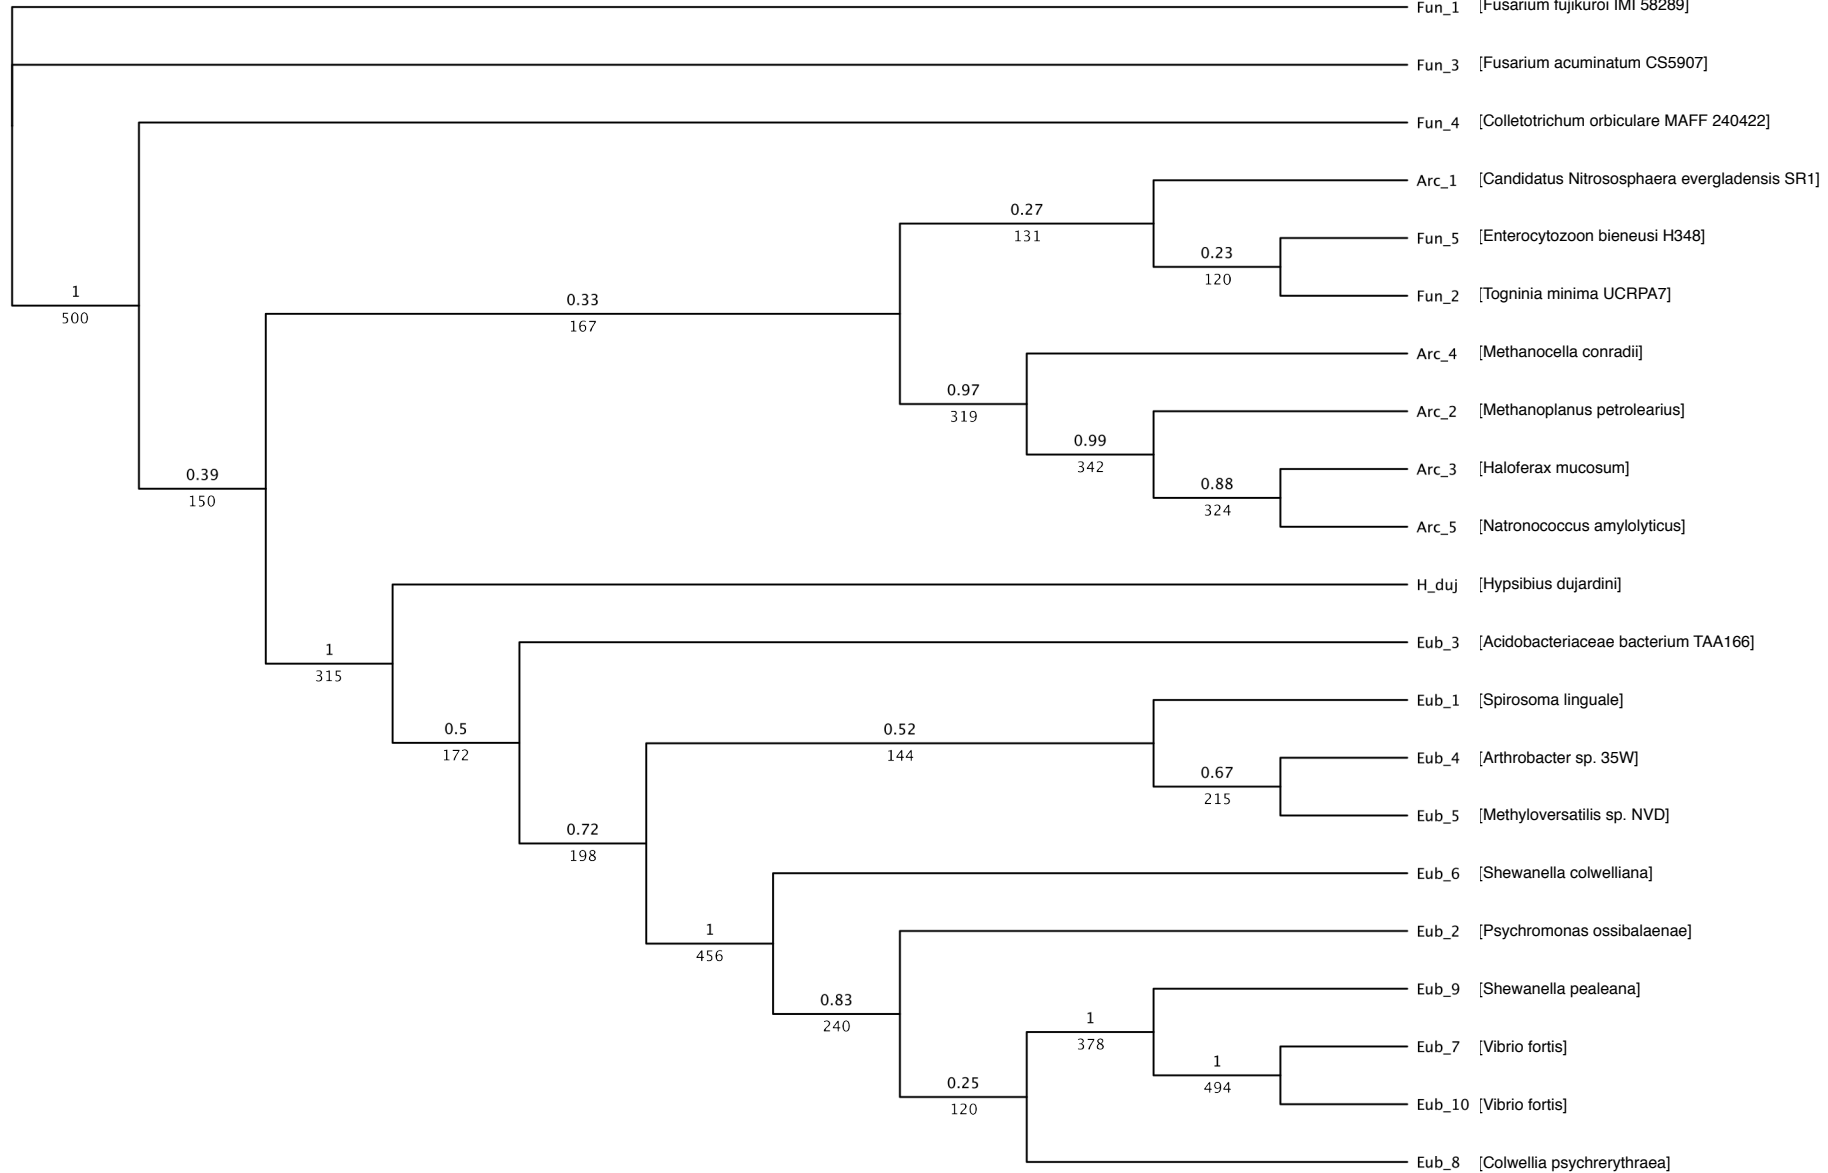

maker\_scaffold653\_size38539\_augustus\_gene\_0.27

PREDICTED: crocetin glucosyltransferase, chloroplastic-like

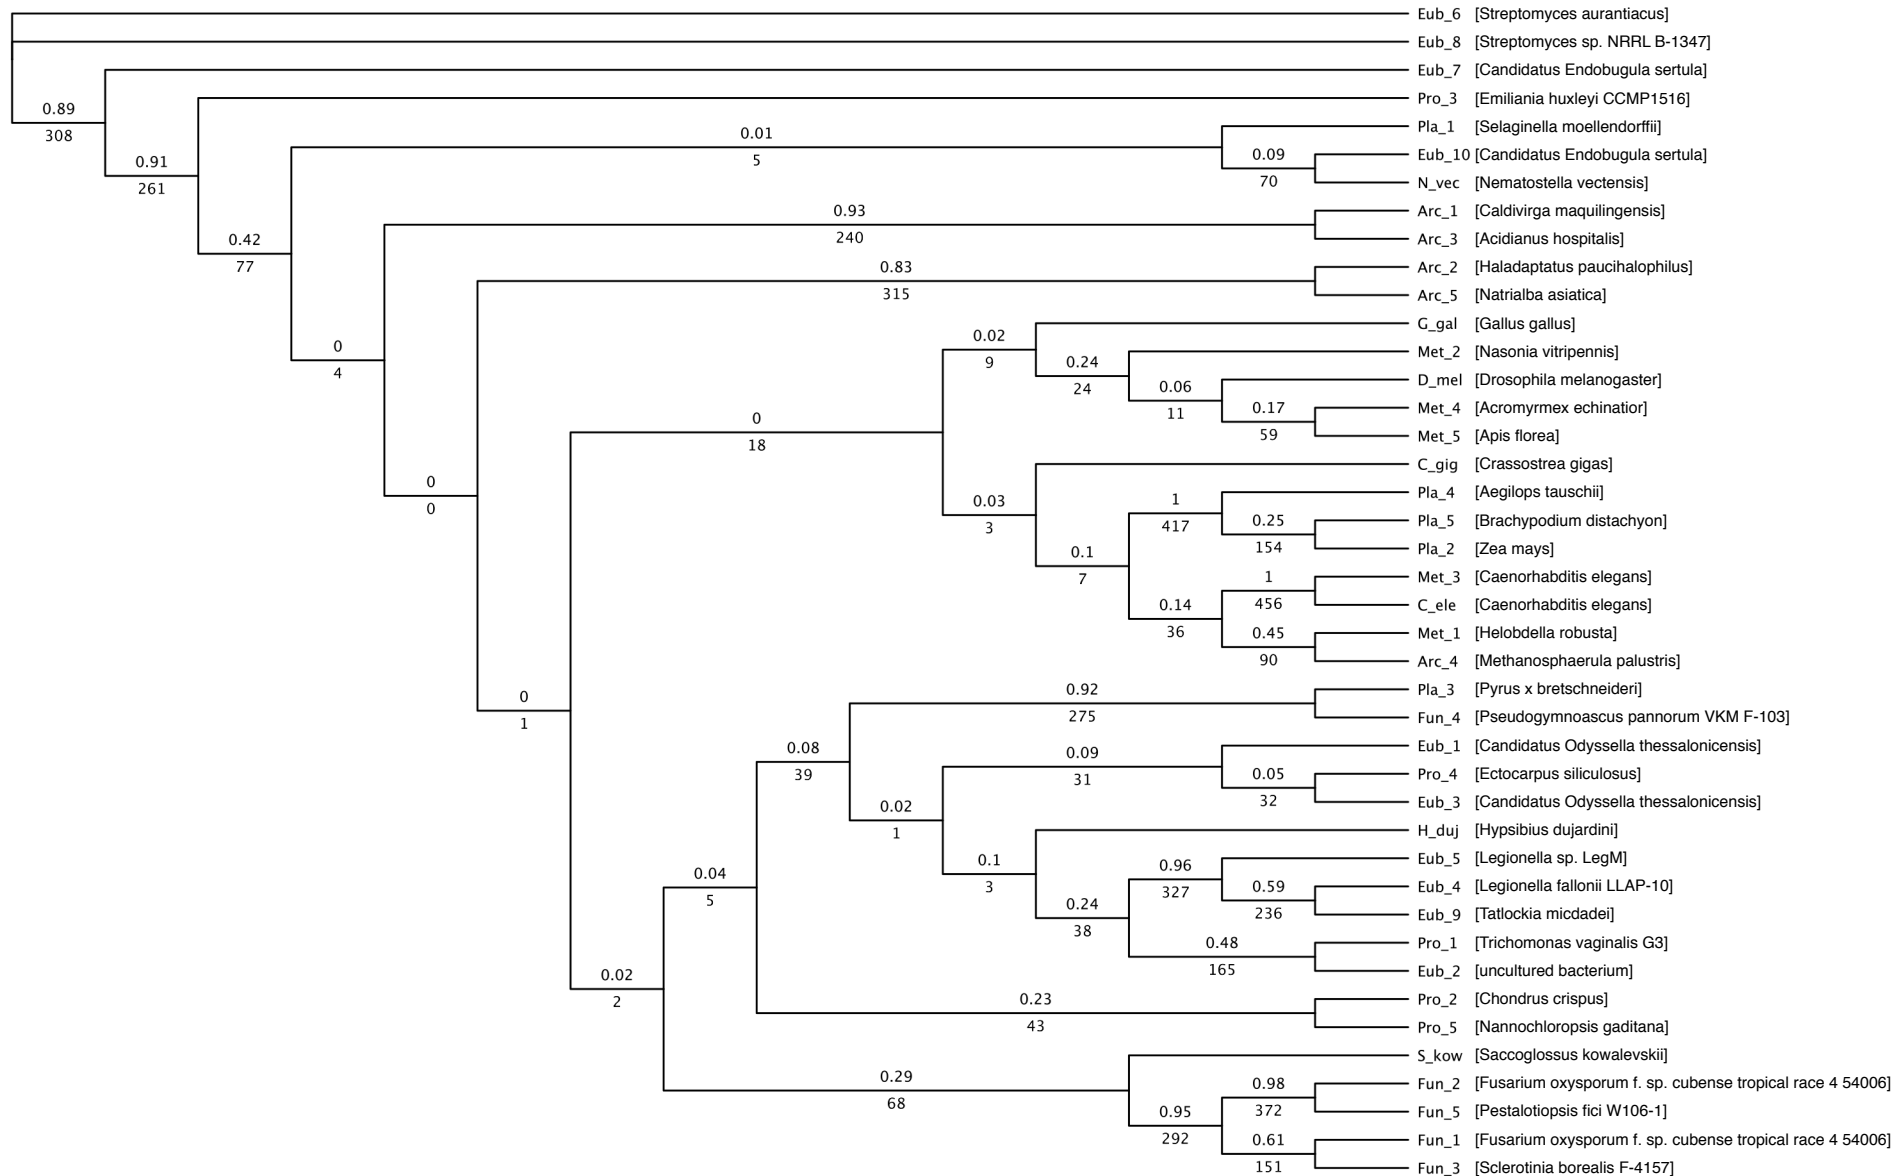

## glycoside hydrolase family 43

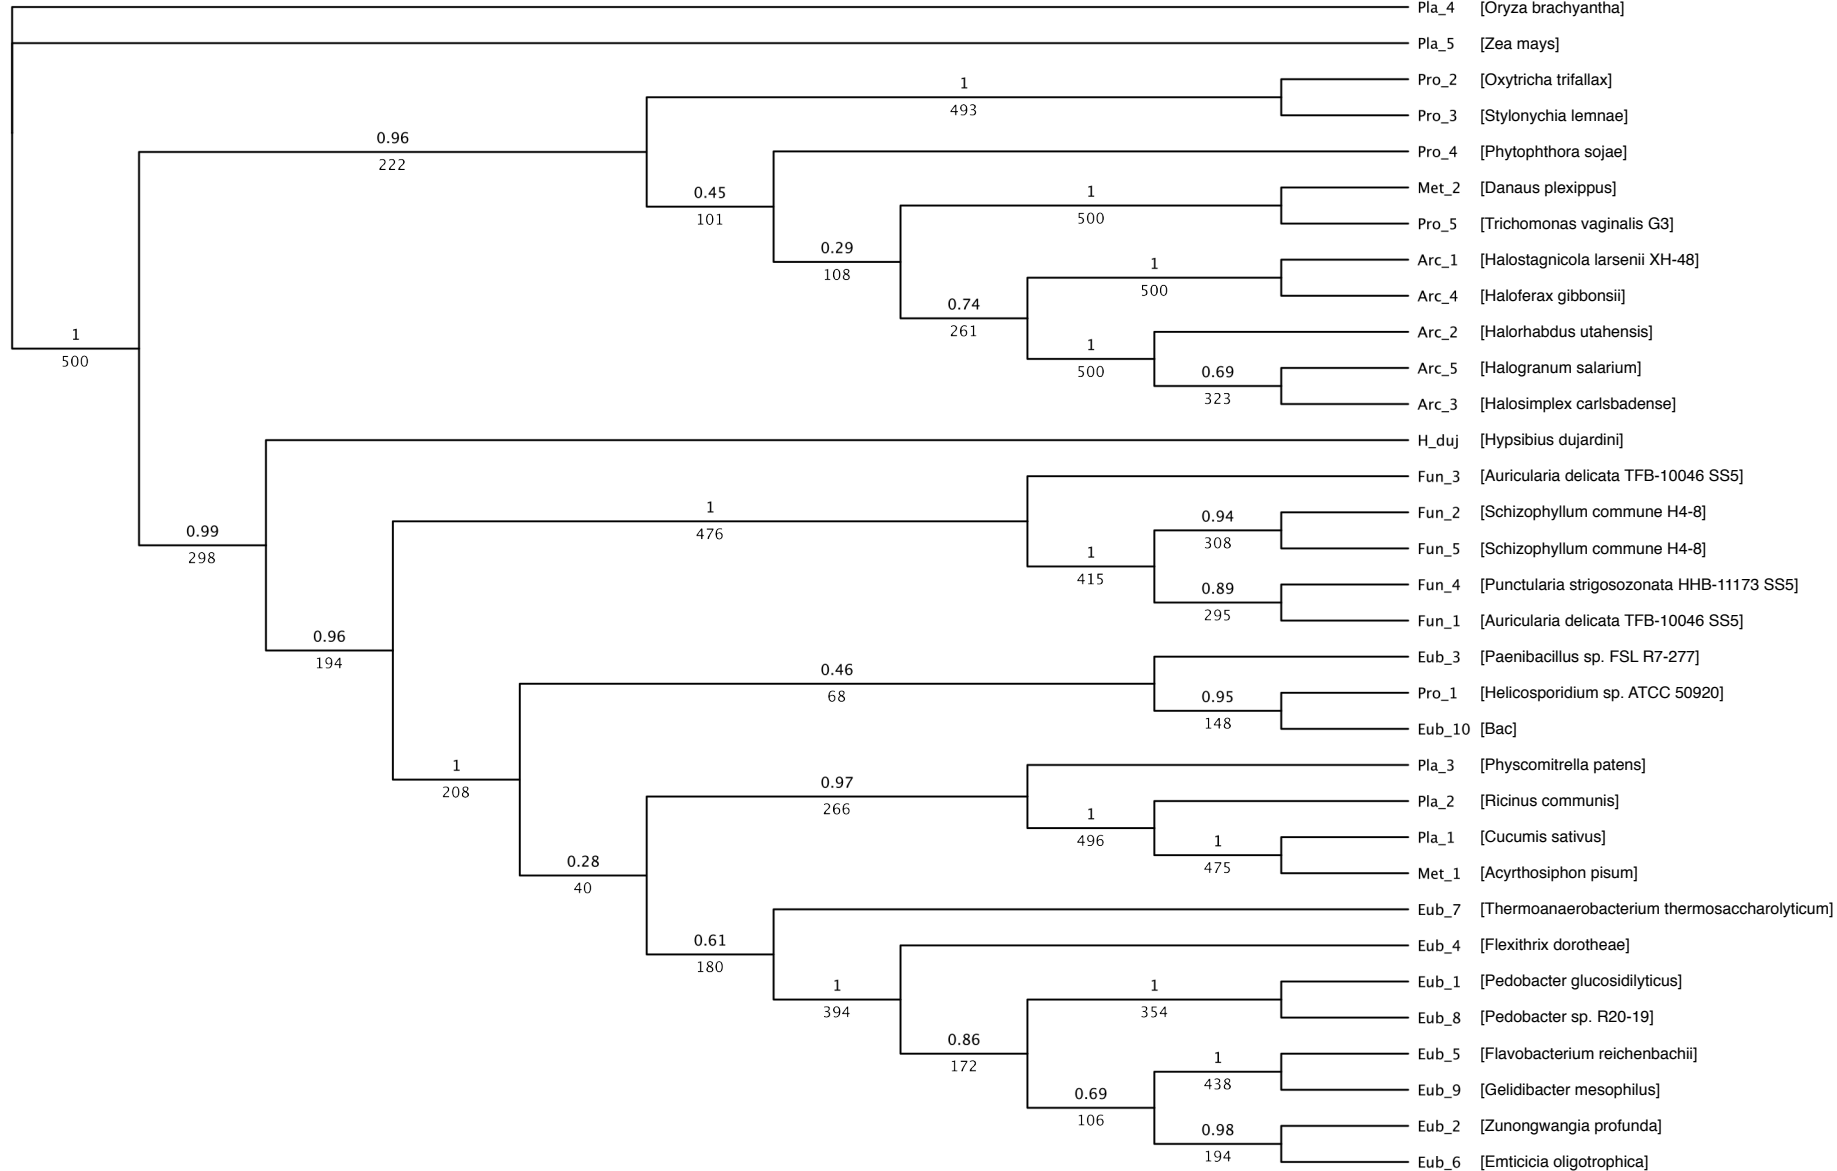

maker\_scaffold505\_size42588\_augustus\_gene\_0.26

hypothetical protein BATDERAFT\_8747

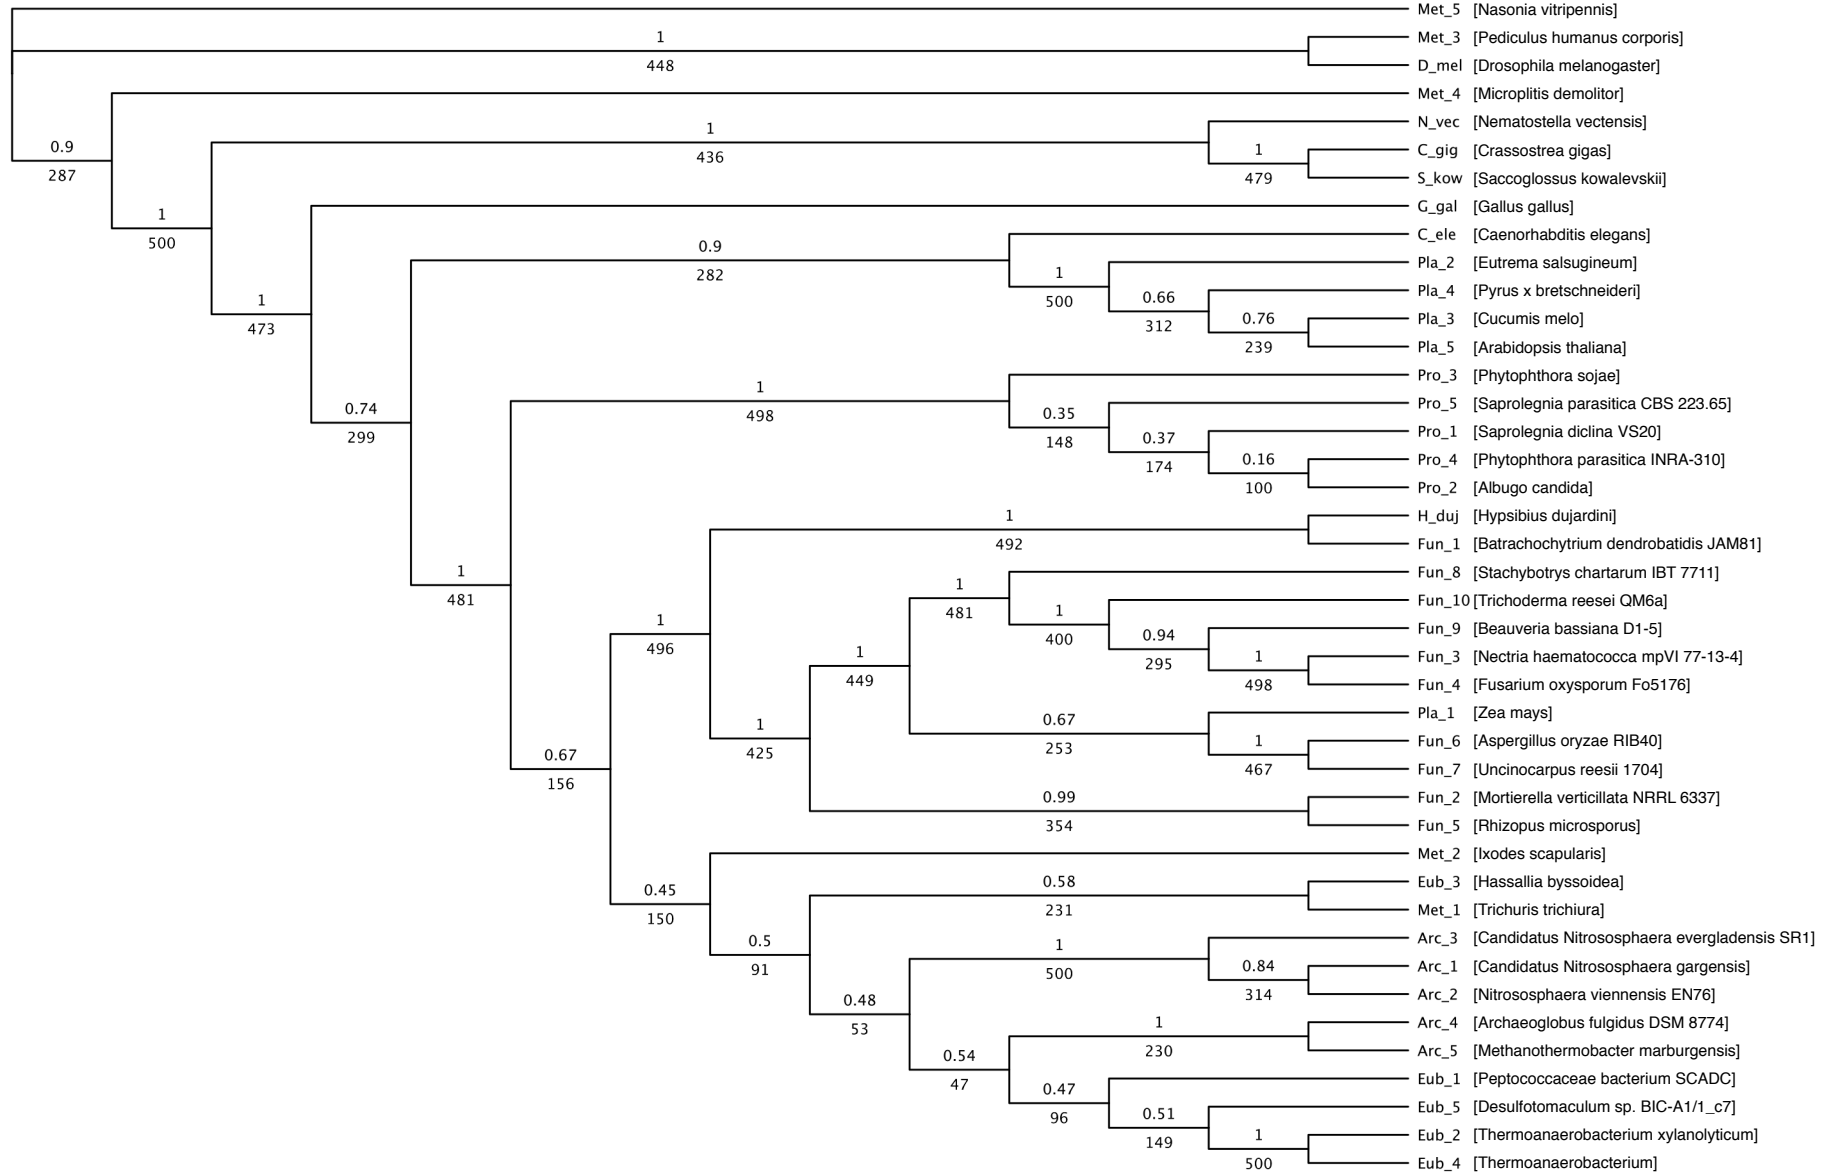



hypothetical protein mv\_R860

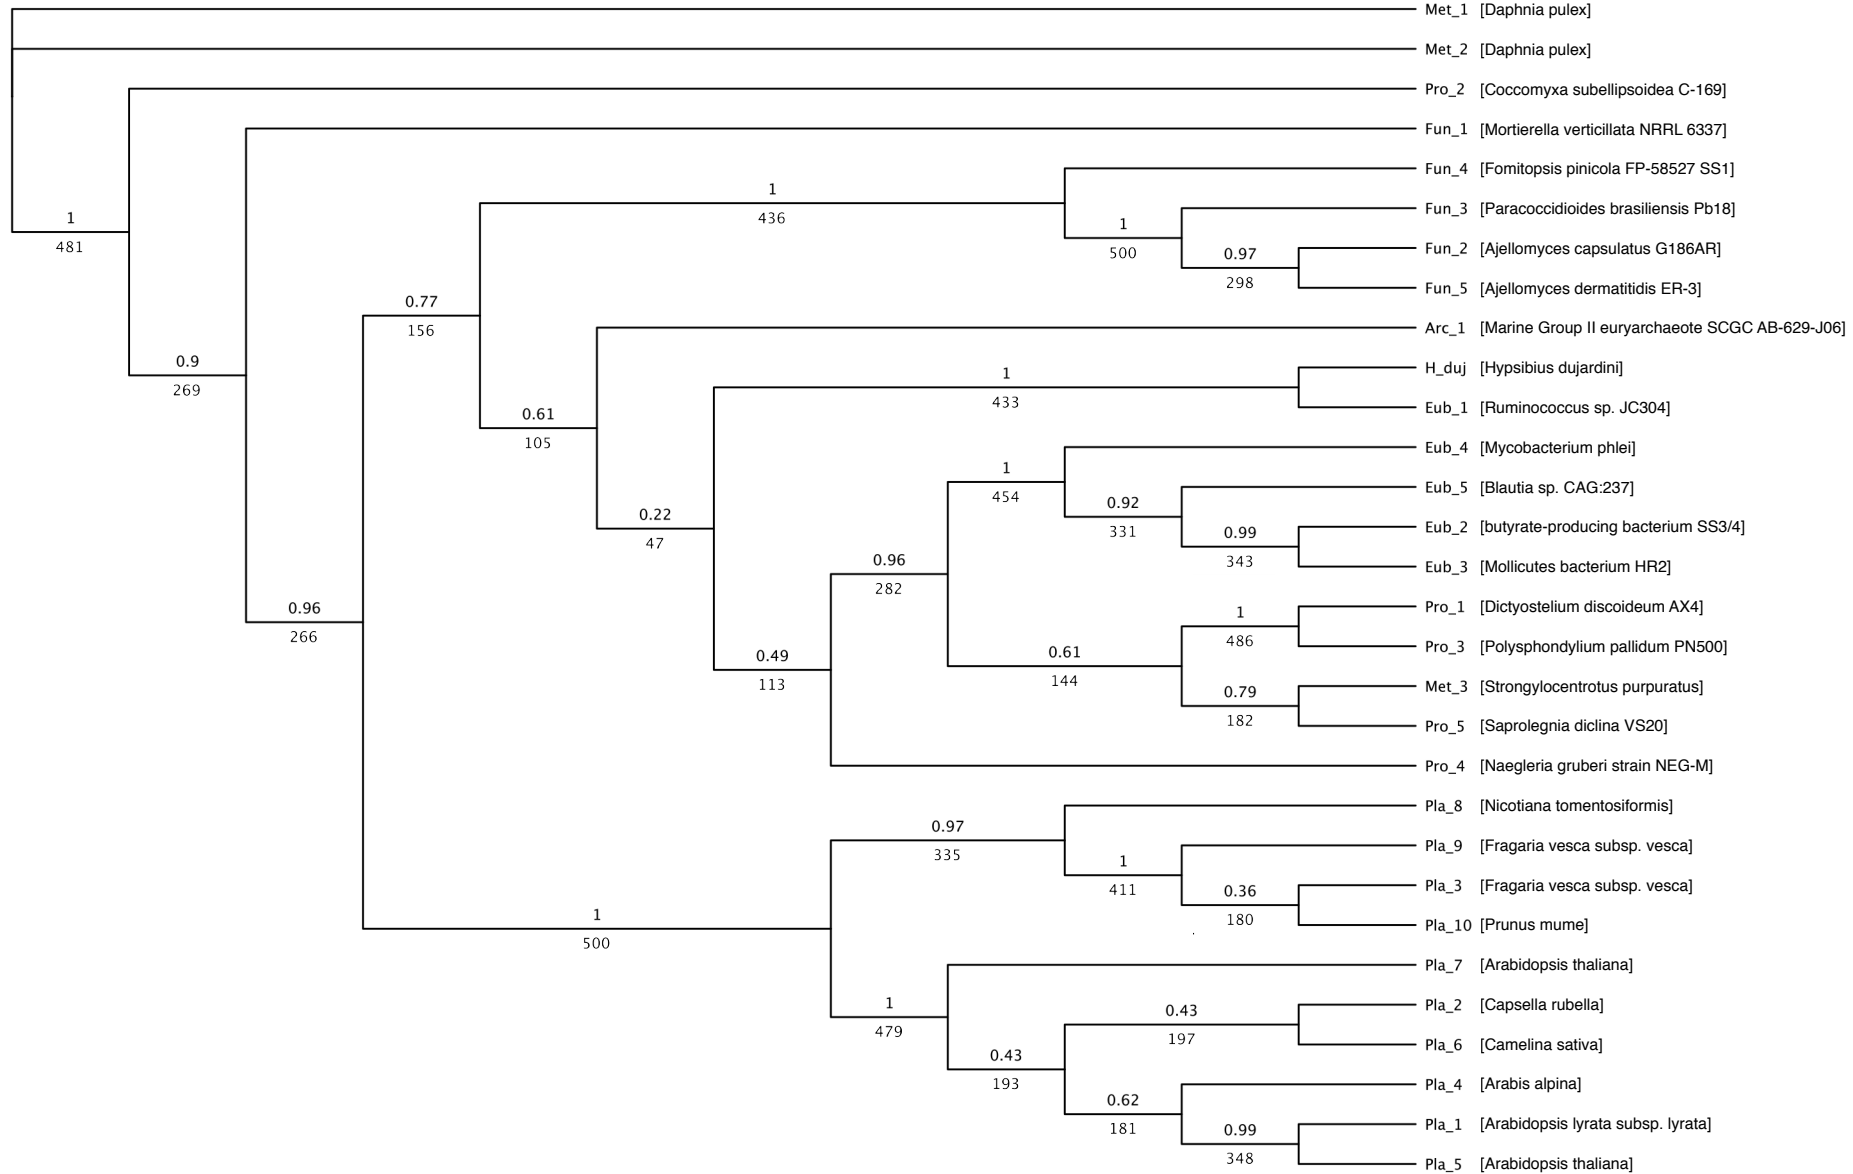

maker\_scaffold301\_size53378\_augustus\_gene\_0.28

hypothetical protein

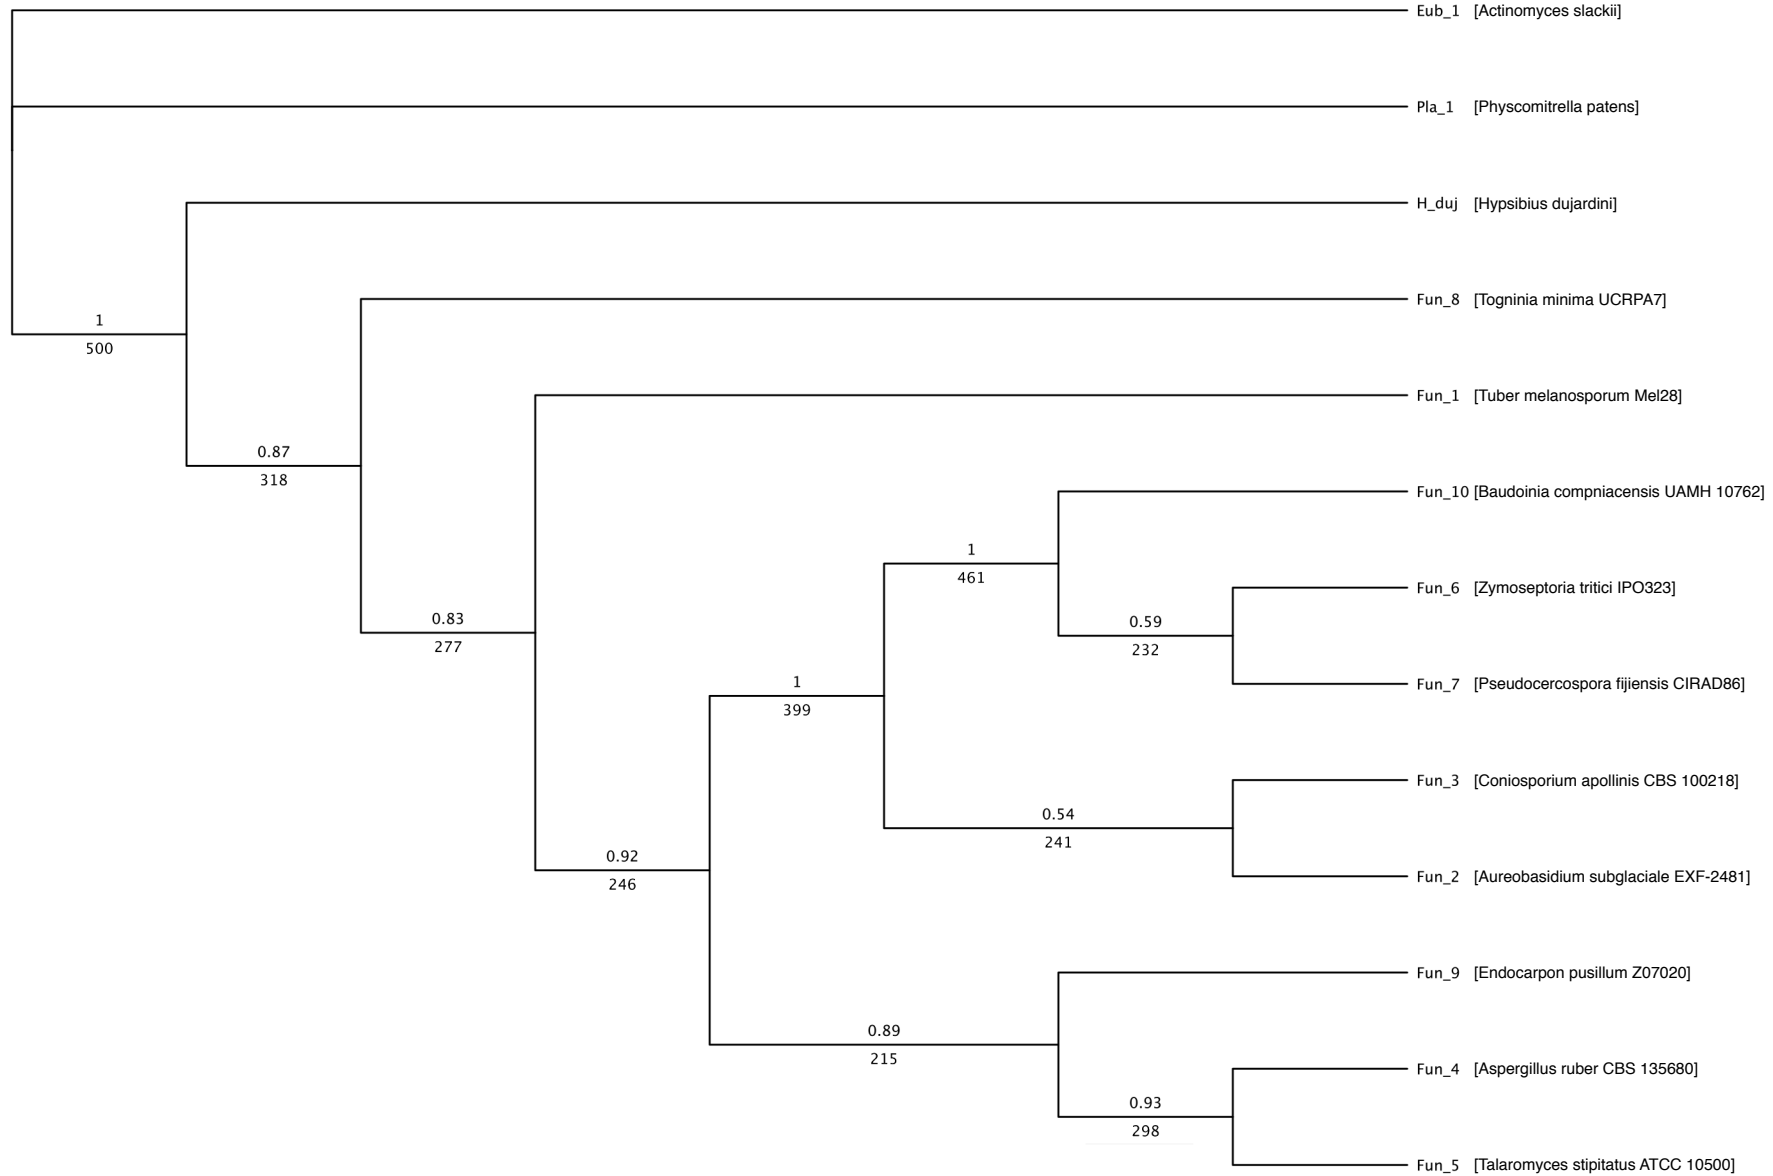

maker\_scaffold117\_augustus\_gene\_0.84

molybdenum ABC transporter permease

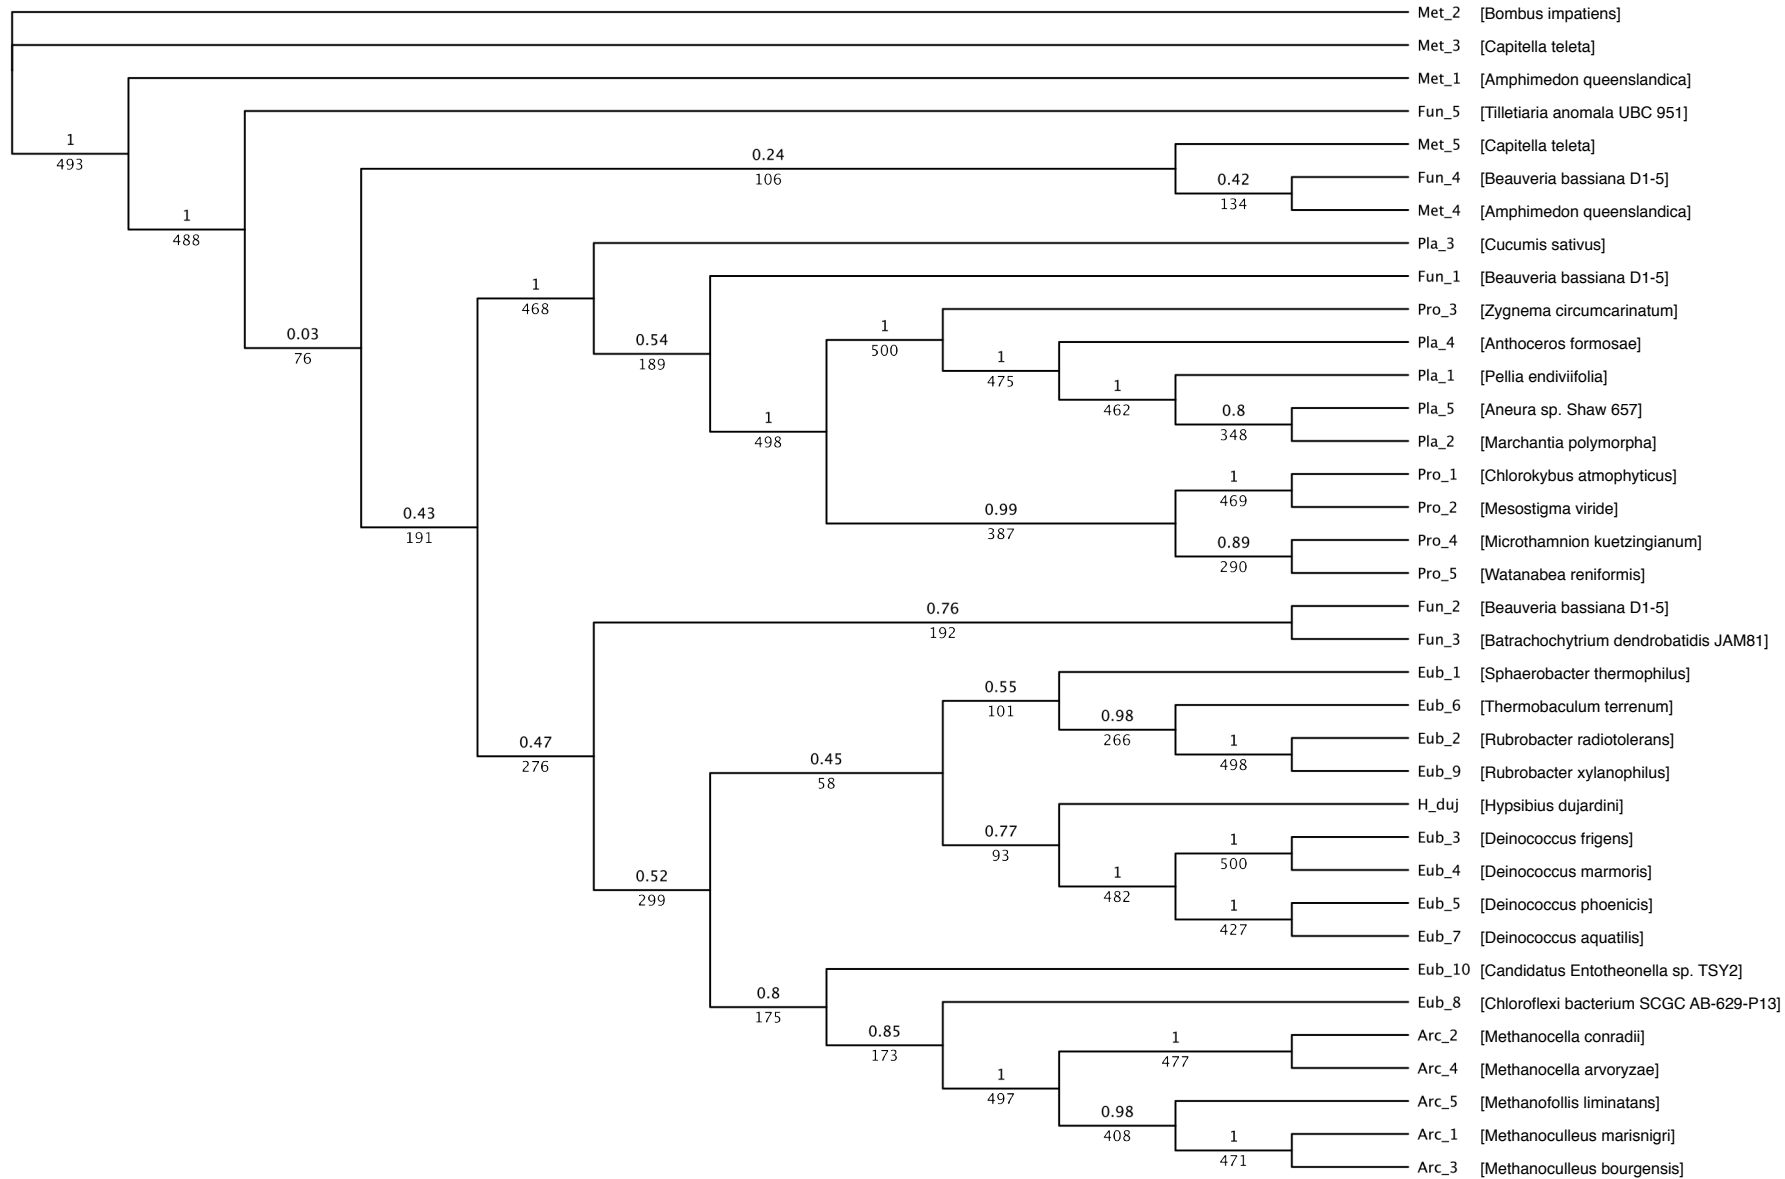

maker\_scaffold115\_snap\_gene\_0.80  
peptide ABC transporter ATPase

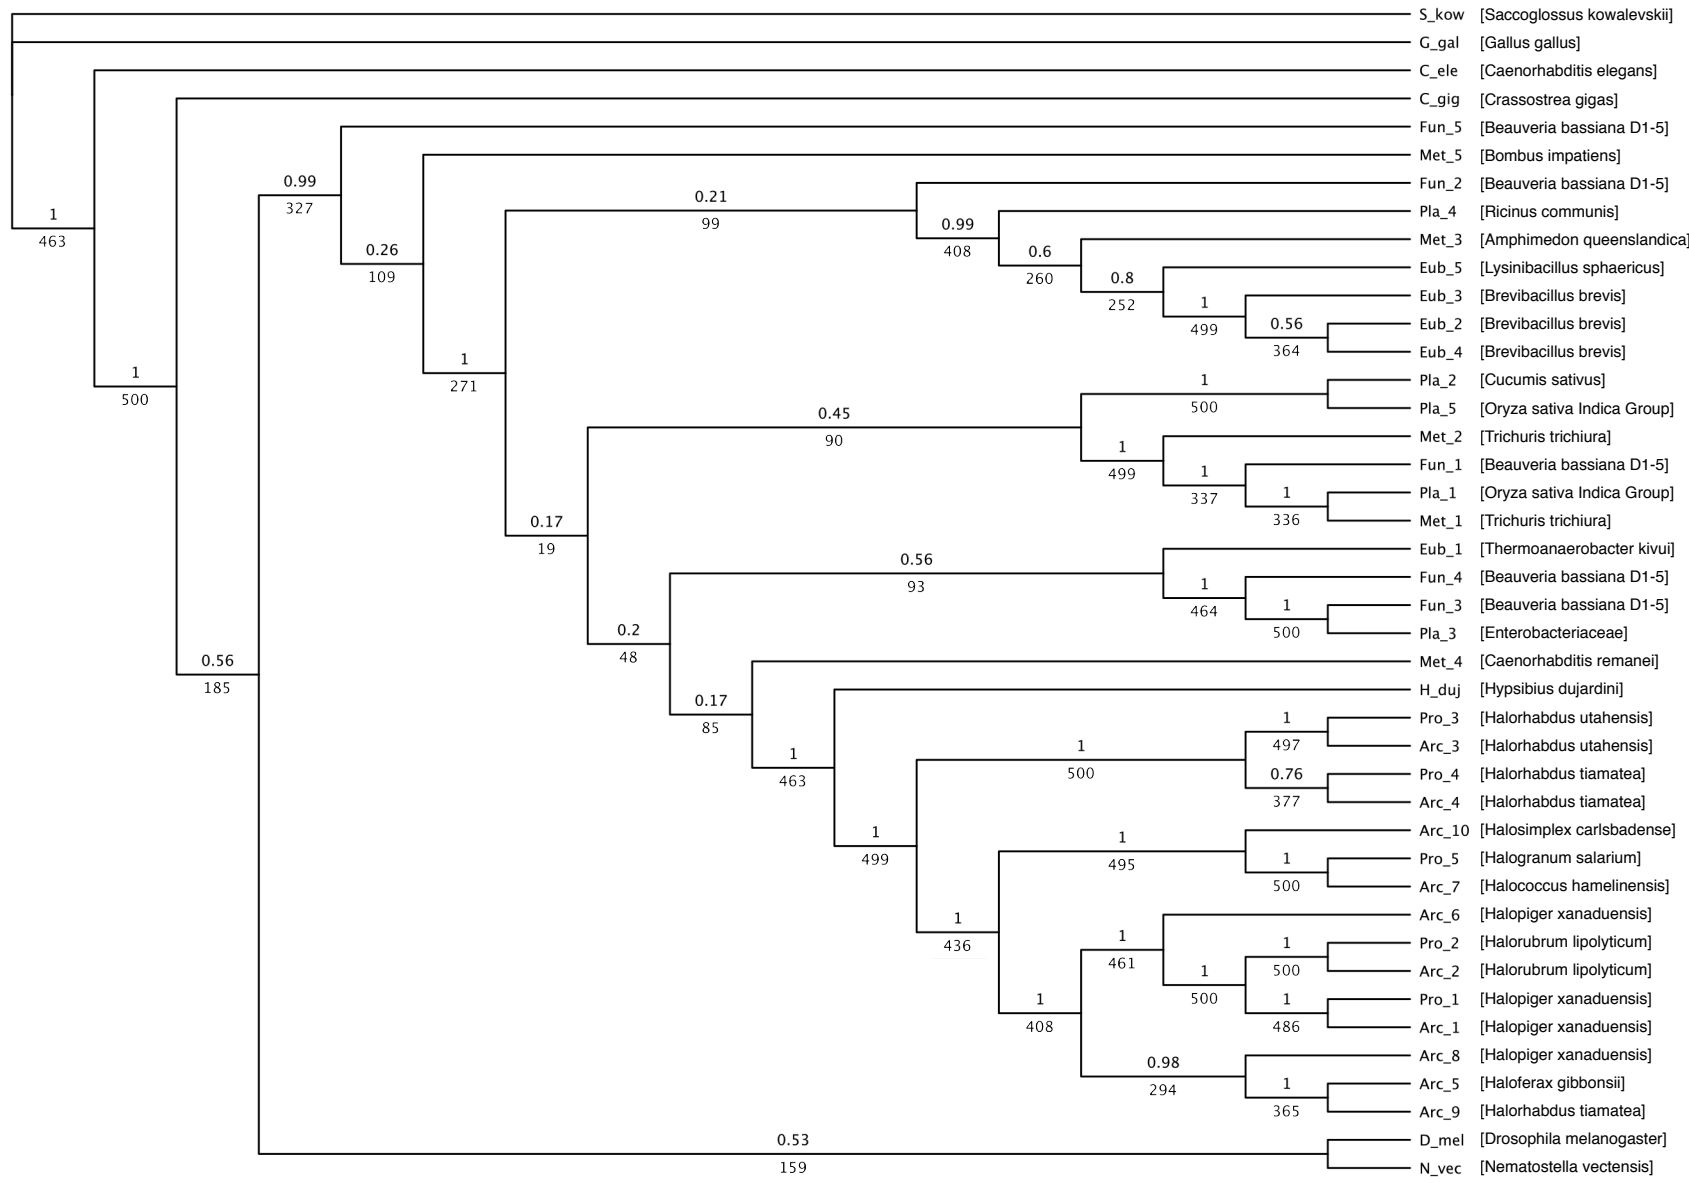

maker\_scaffold104\_augustus\_gene\_0.25

hypothetical protein RirG\_114100

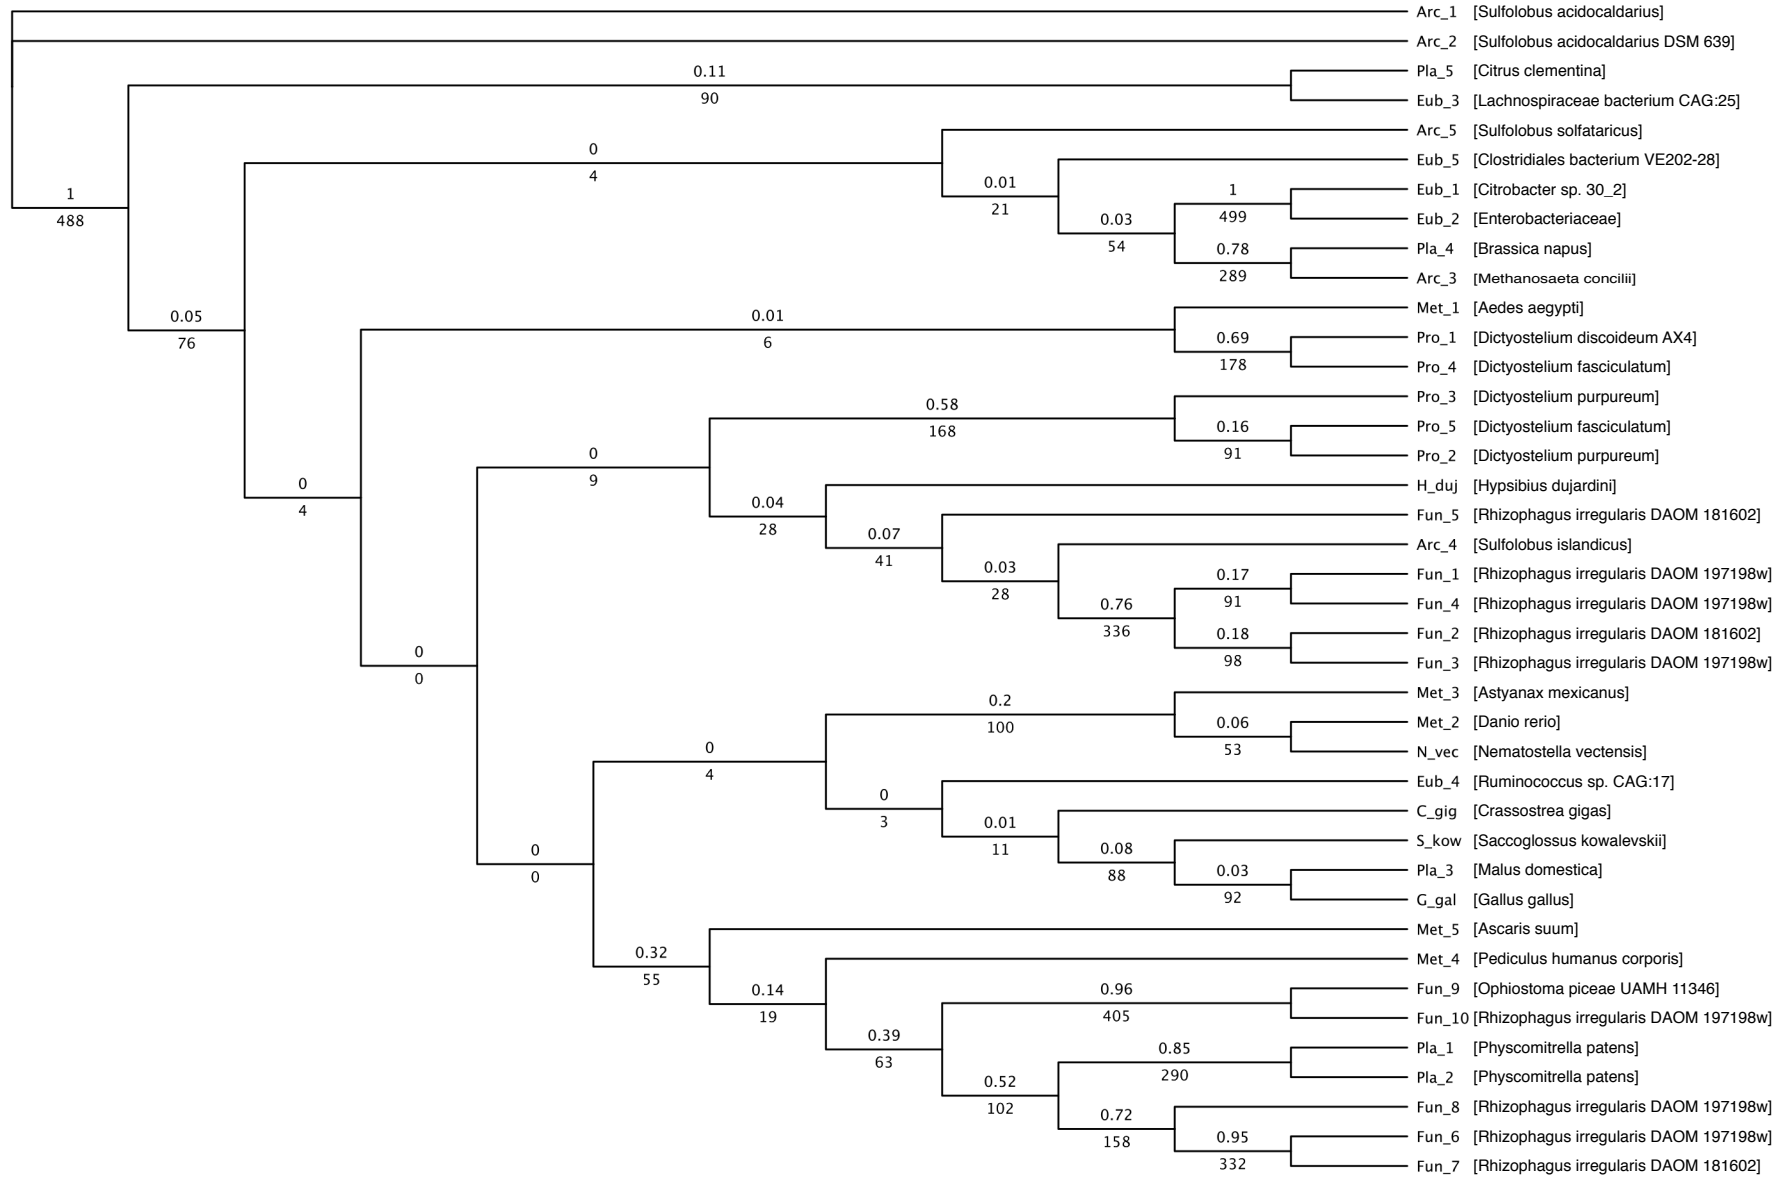

maker\_scaffold100\_snap\_gene\_0.59  
hypothetical protein RirG\_080310

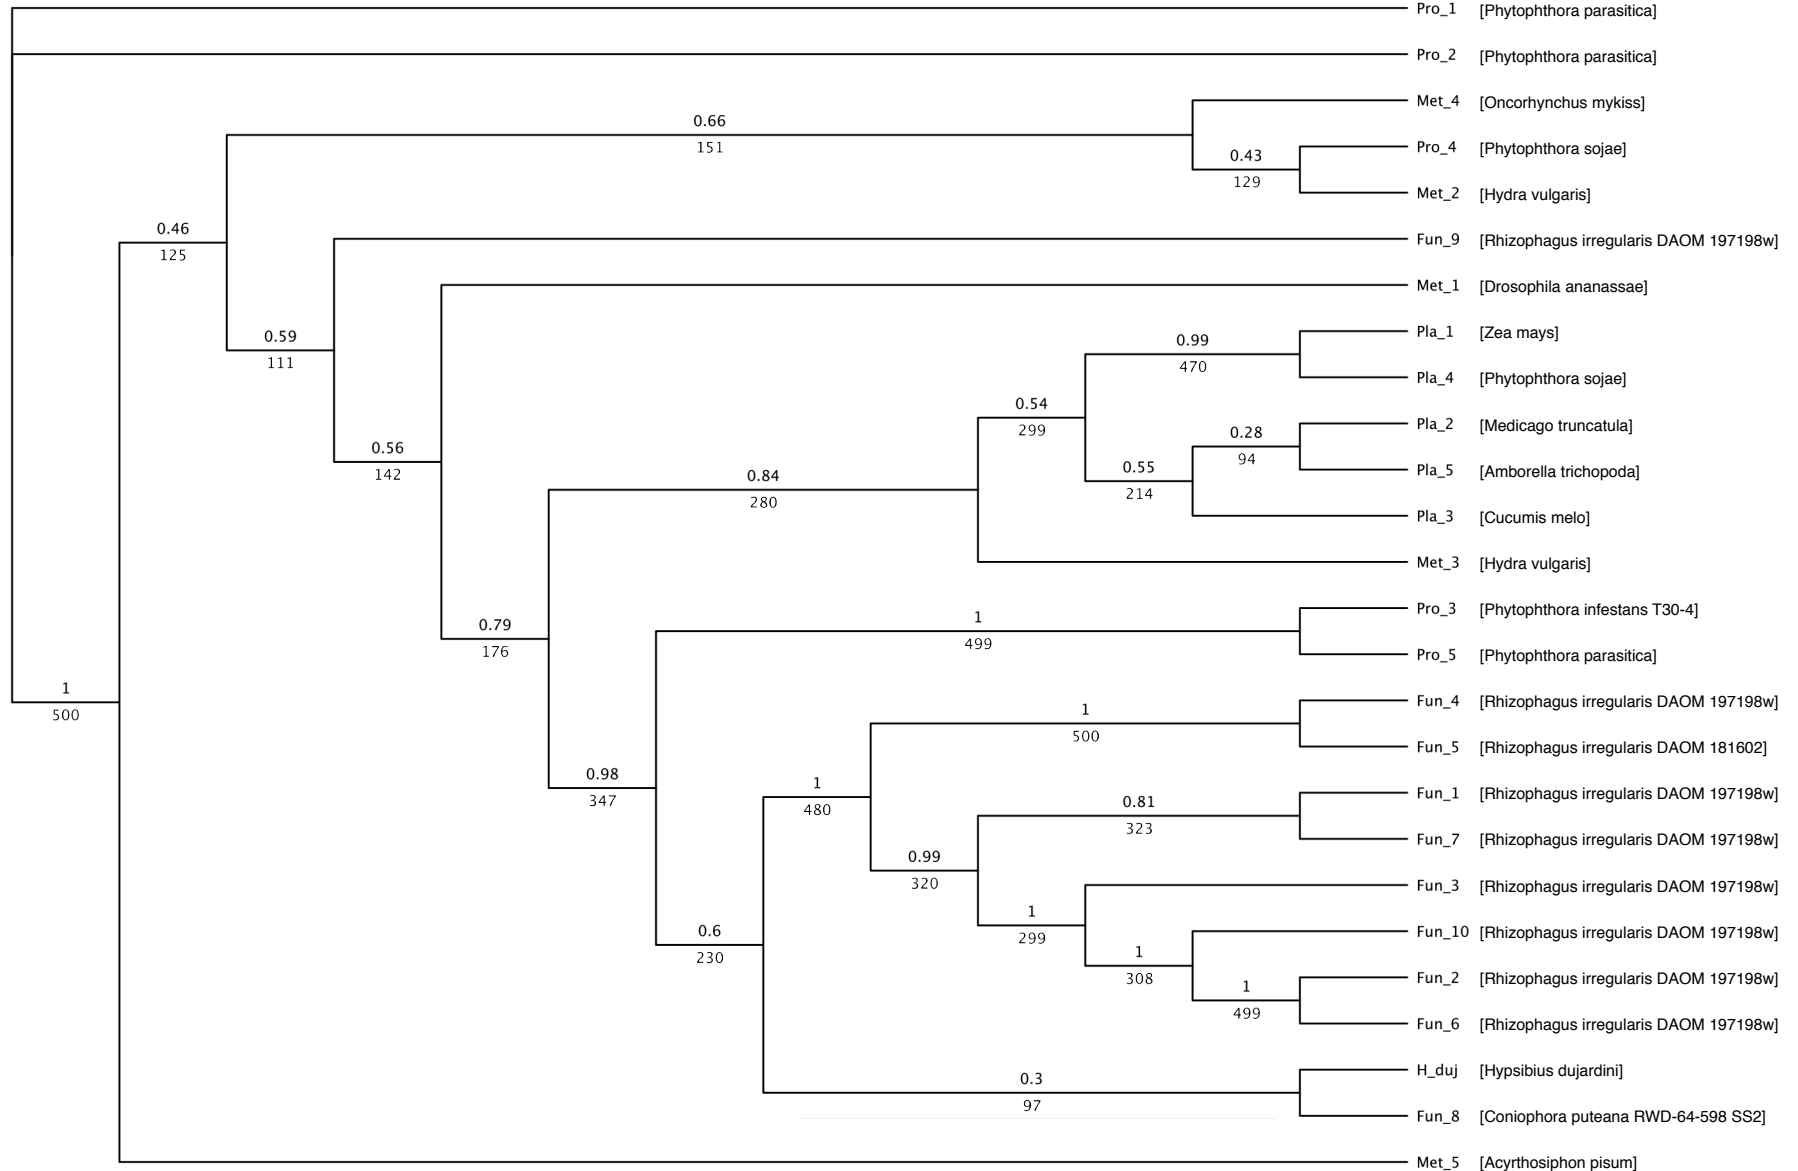

maker\_scaffold81\_size93674\_augustus\_gene\_0.43

hypothetical protein PIIN\_01307

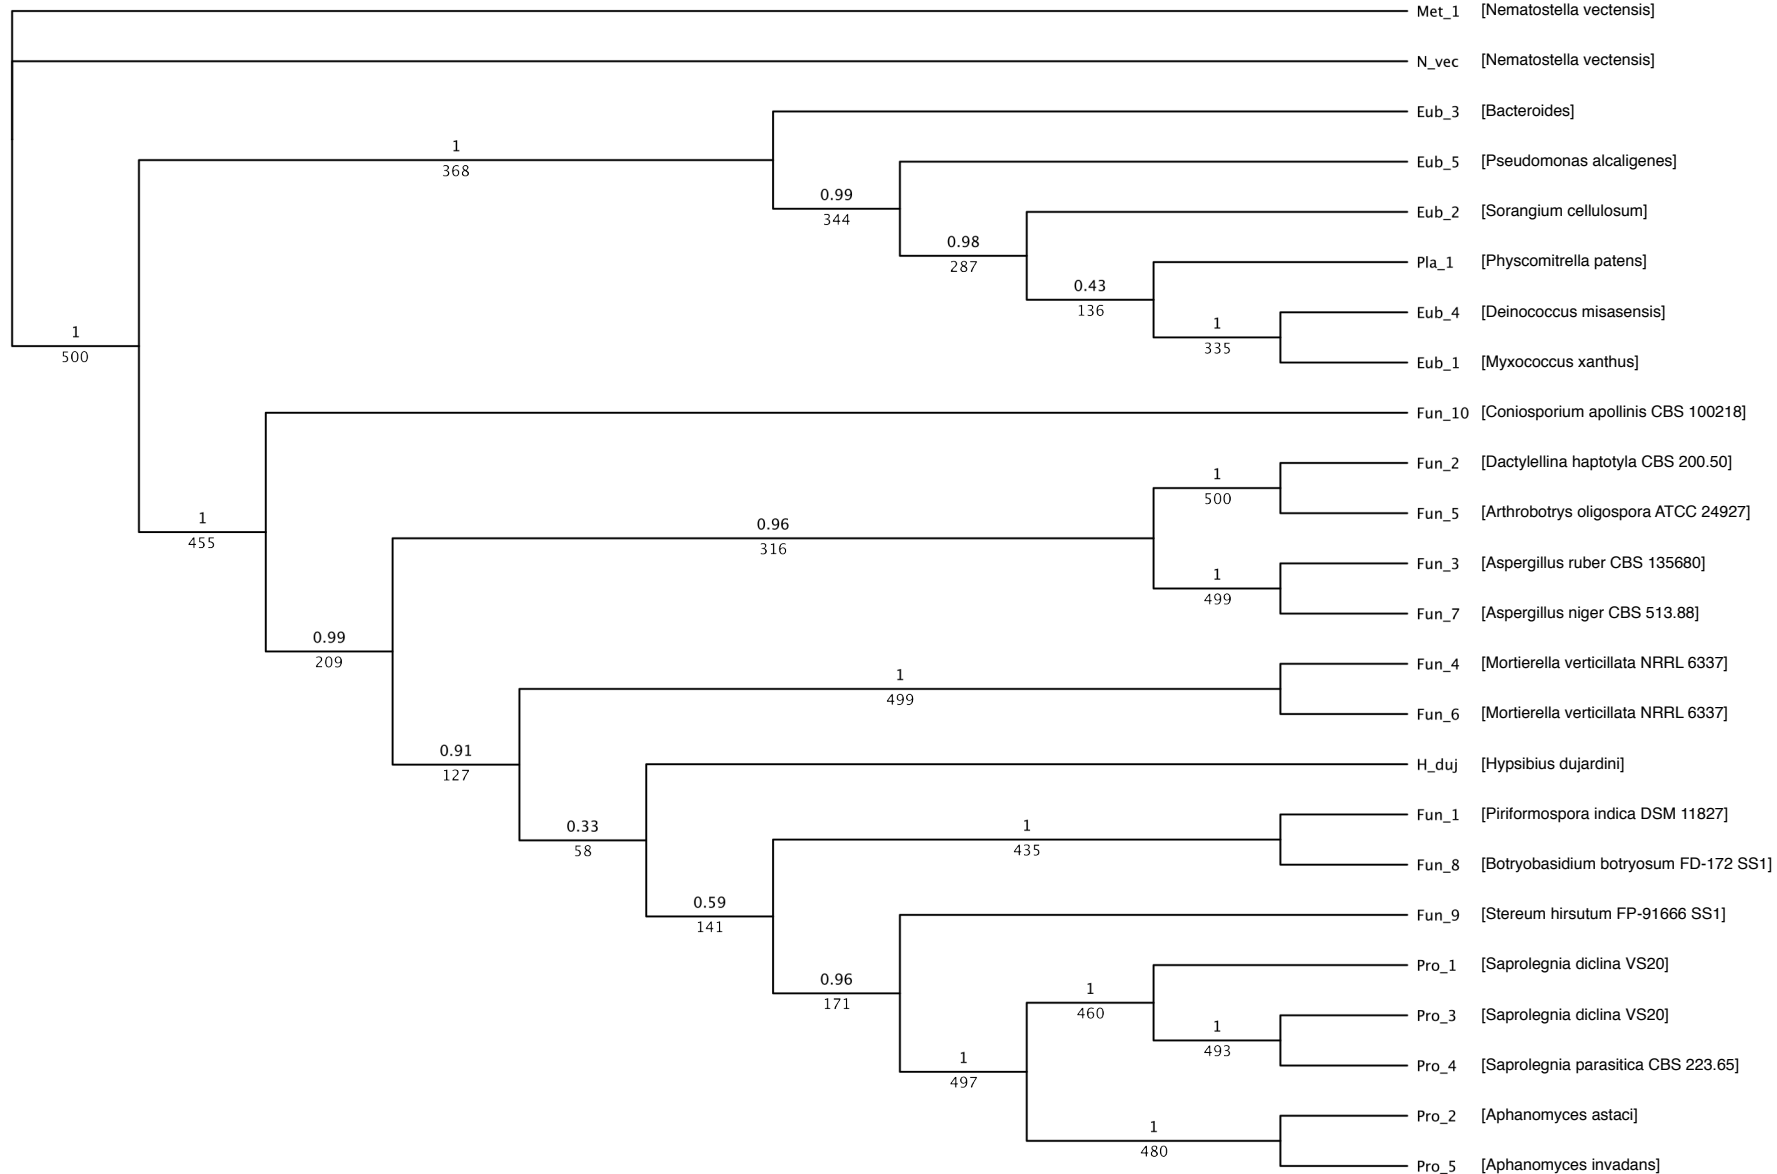

maker\_scaffold80\_size93979\_augustus\_gene\_0.47

hypothetical protein AURDEDRAFT\_172066

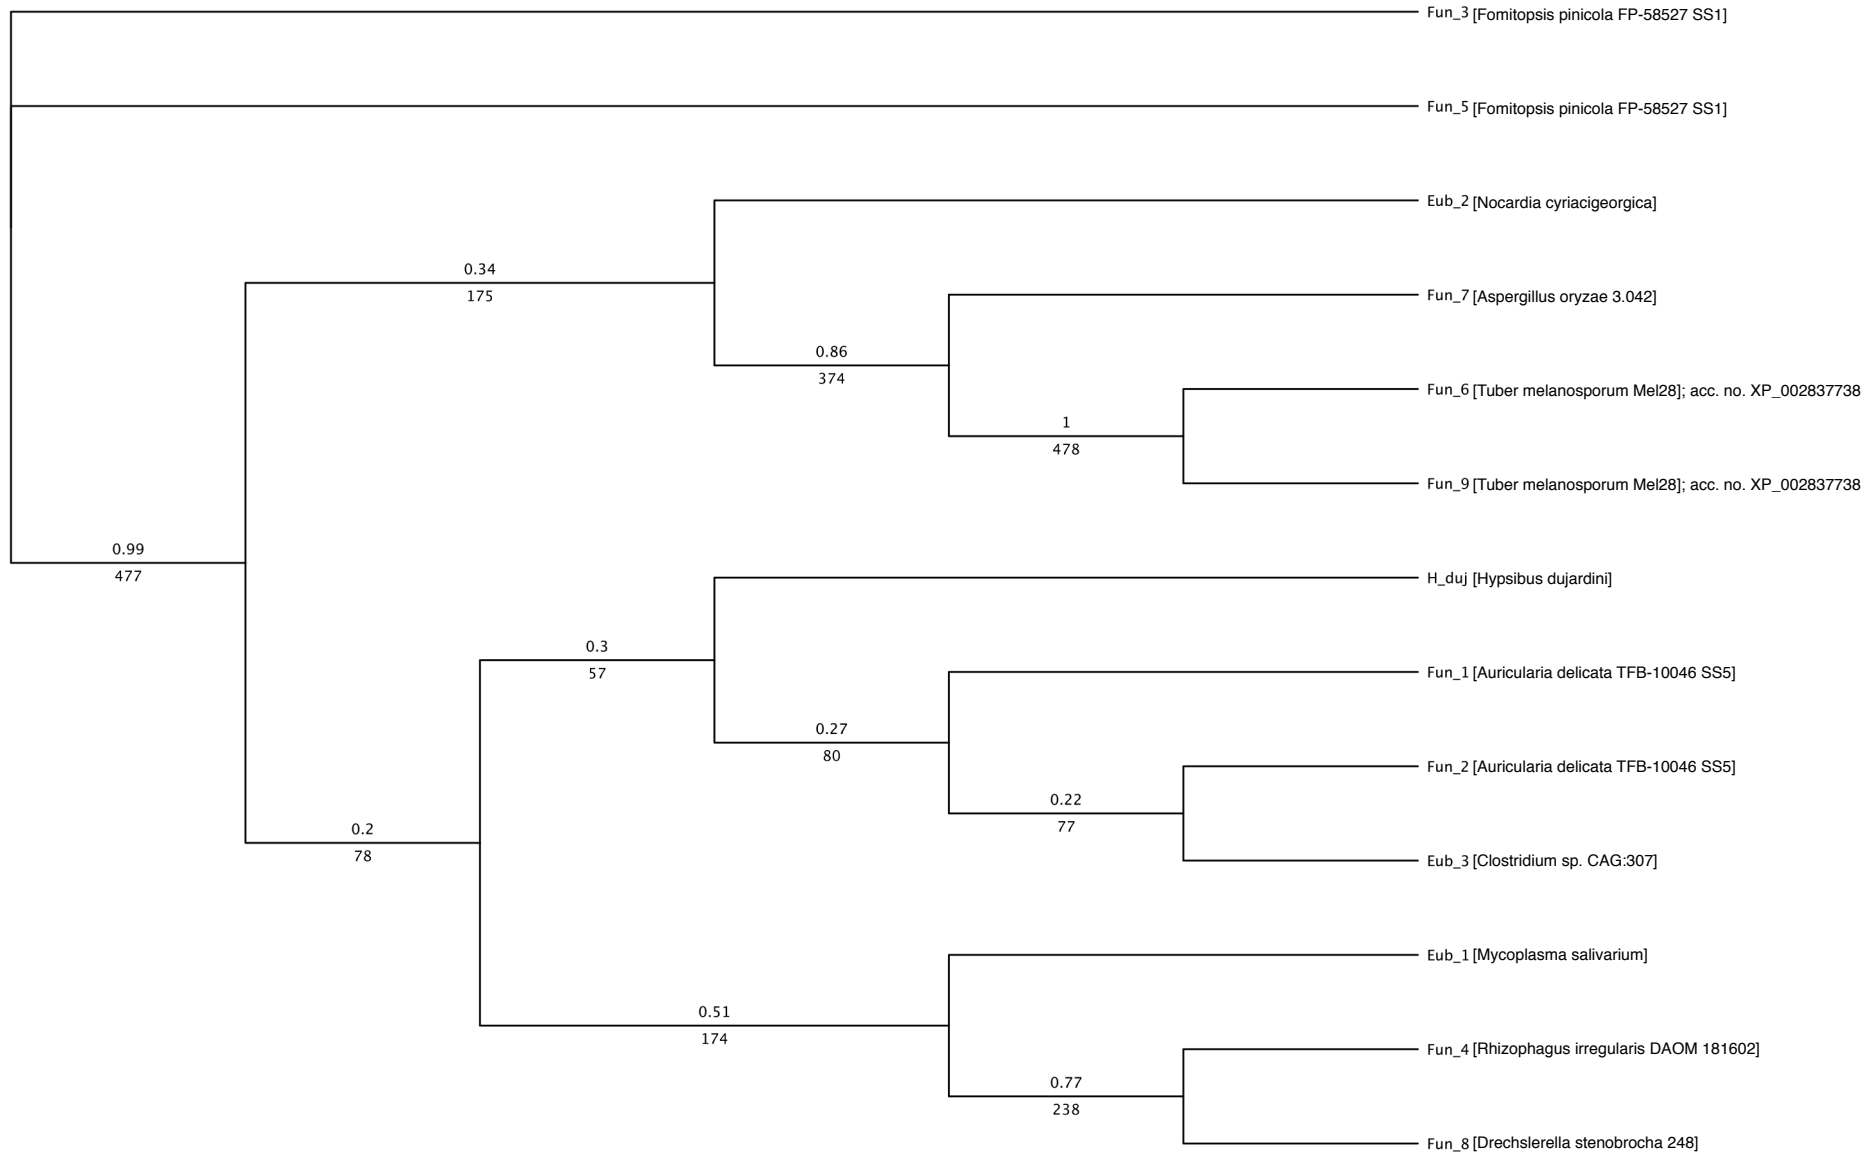



maker\_scaffold74\_size115697\_snap\_gene\_0.80

alpha/beta hydrolase

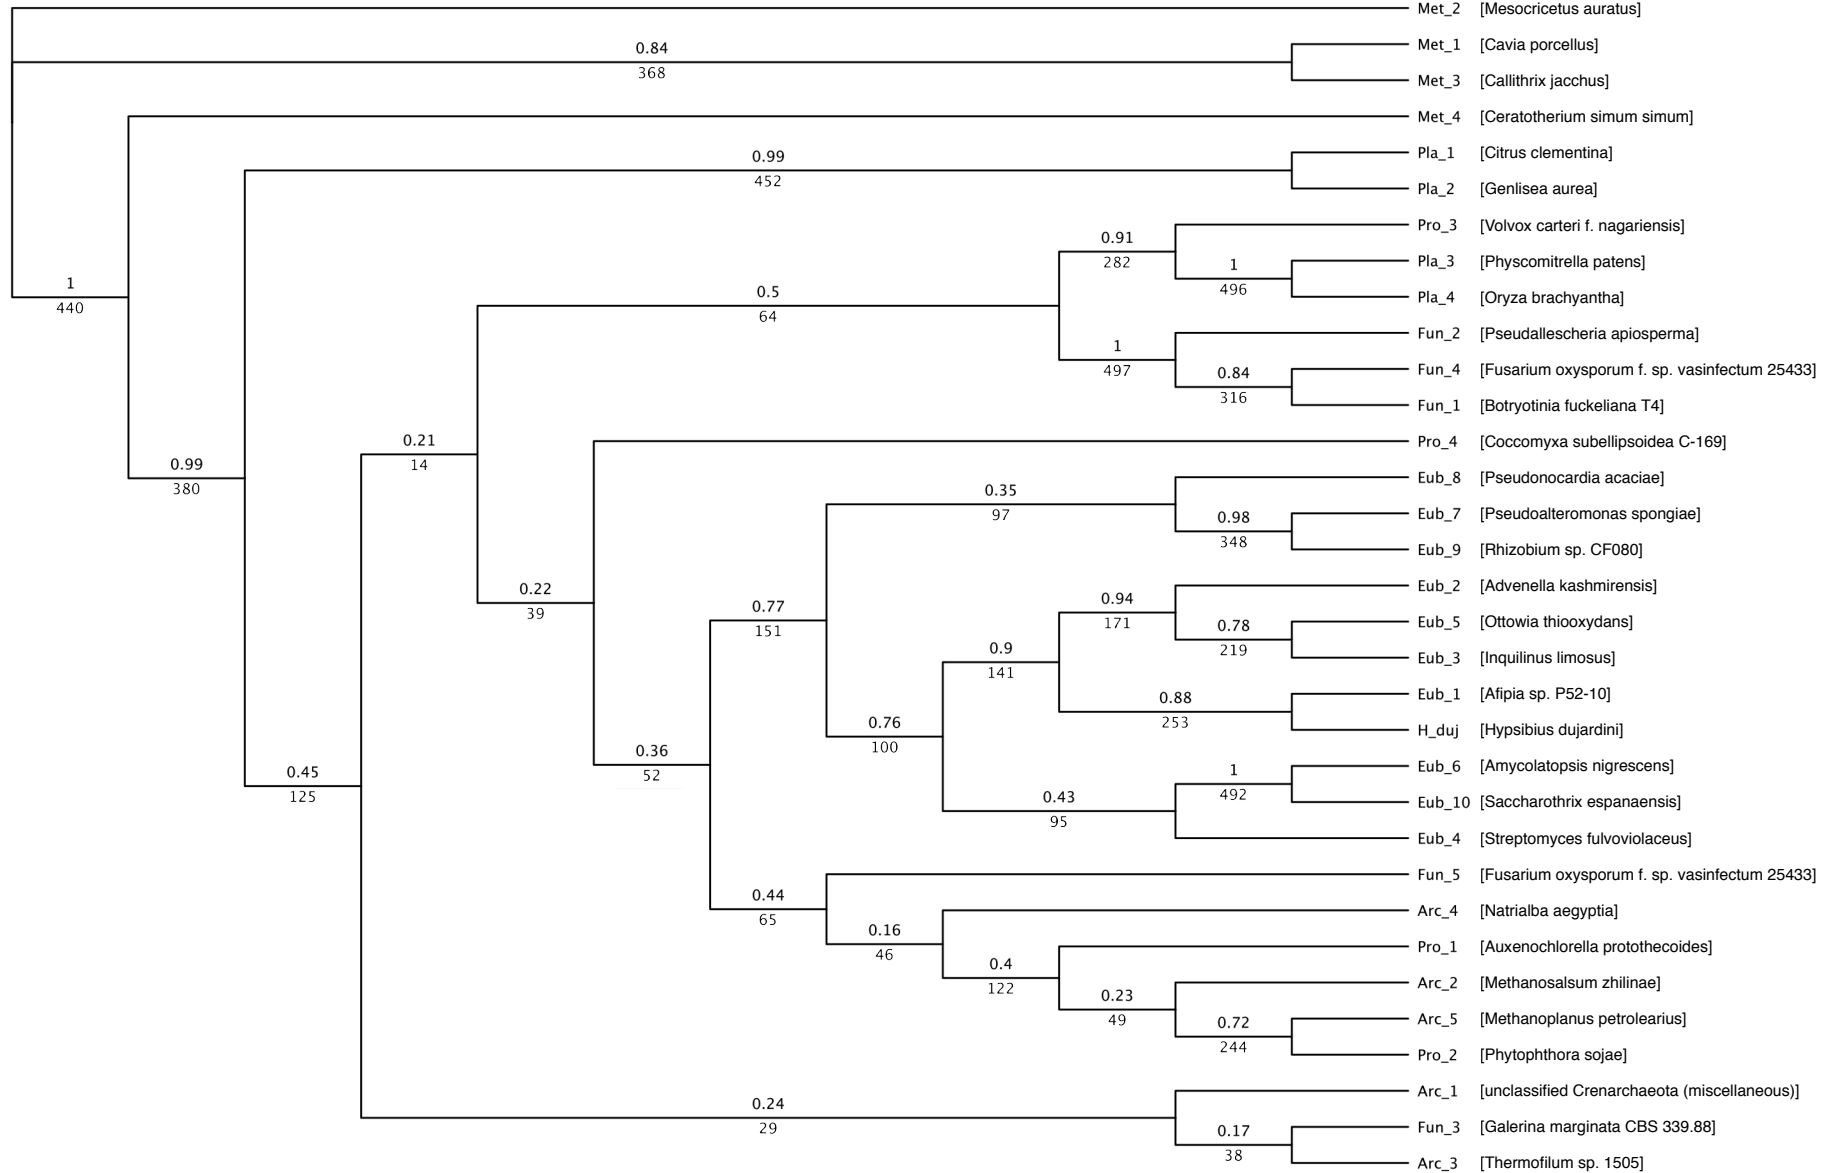

maker\_scaffold48\_augustus\_gene\_0.115

peptidase S9

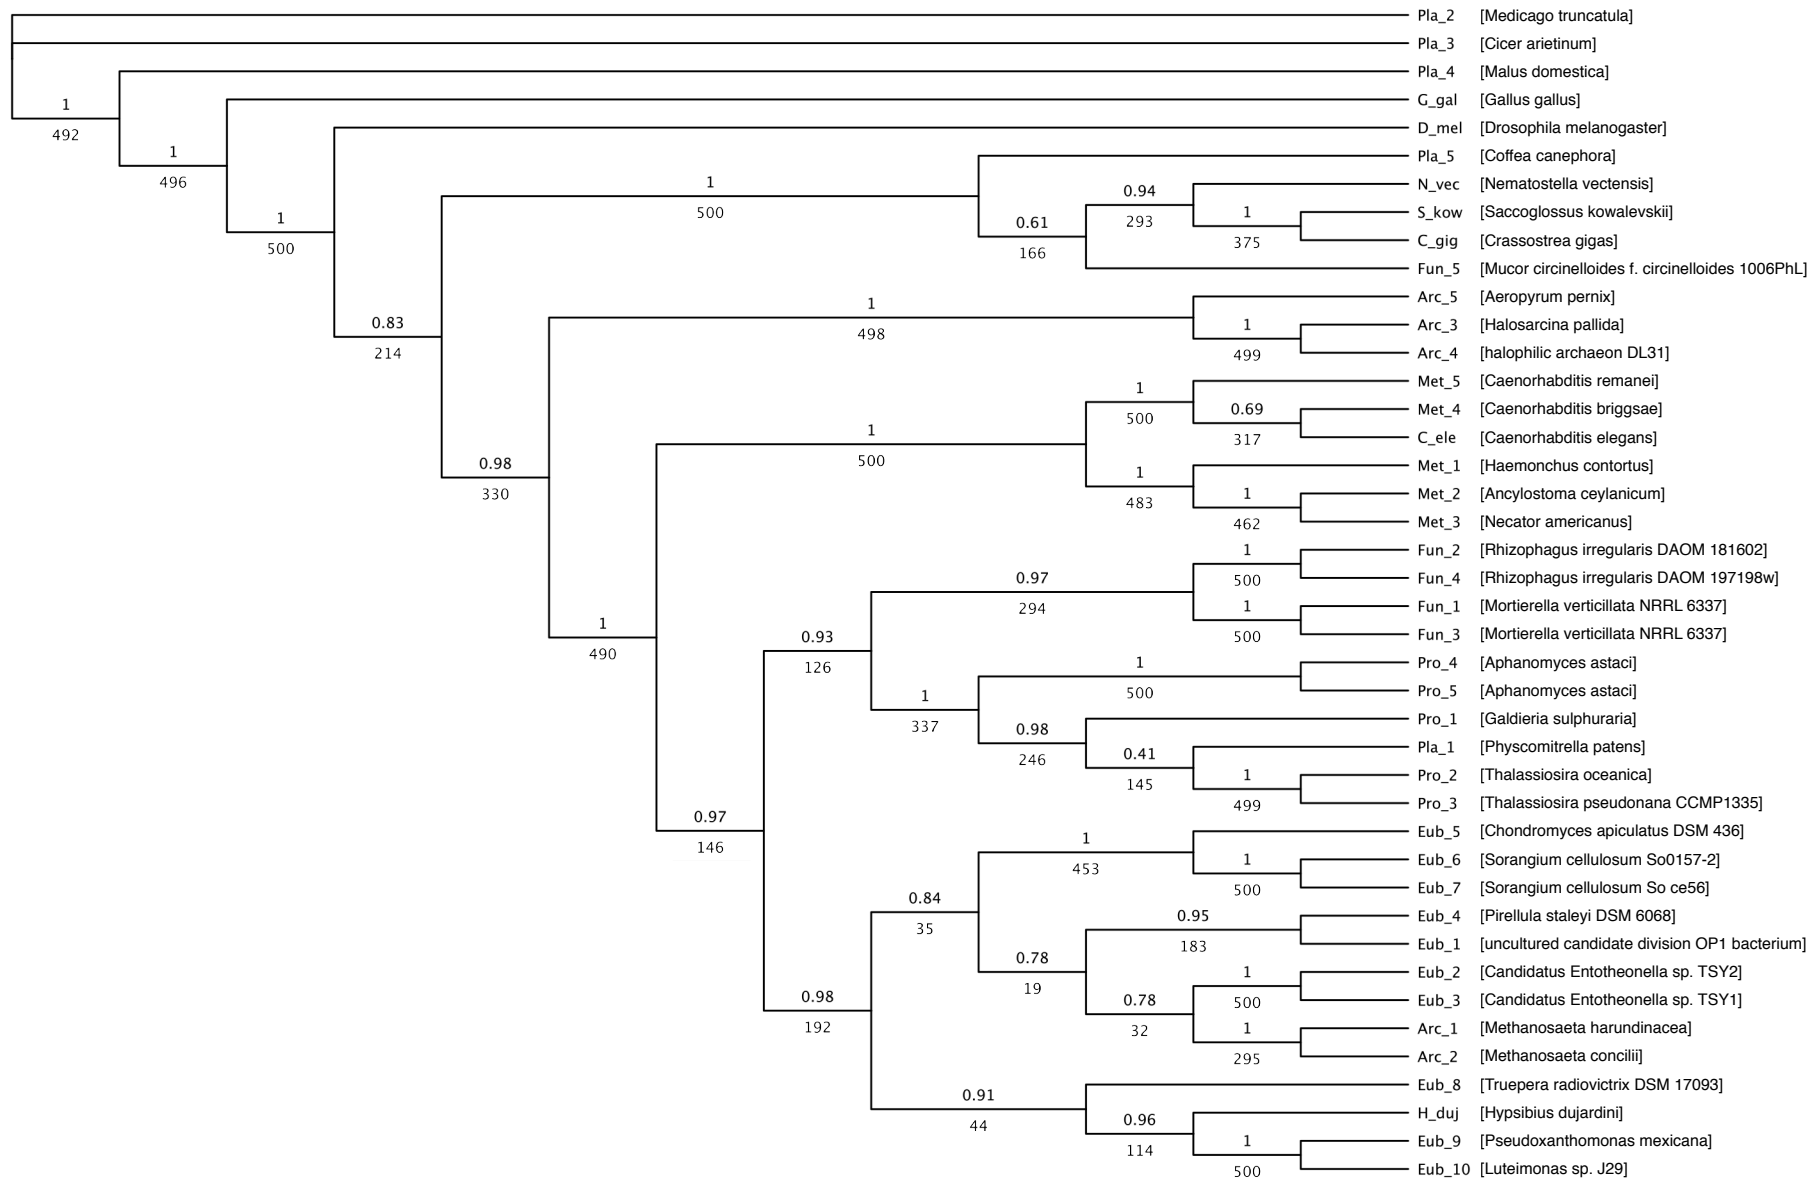

unnamed protein product

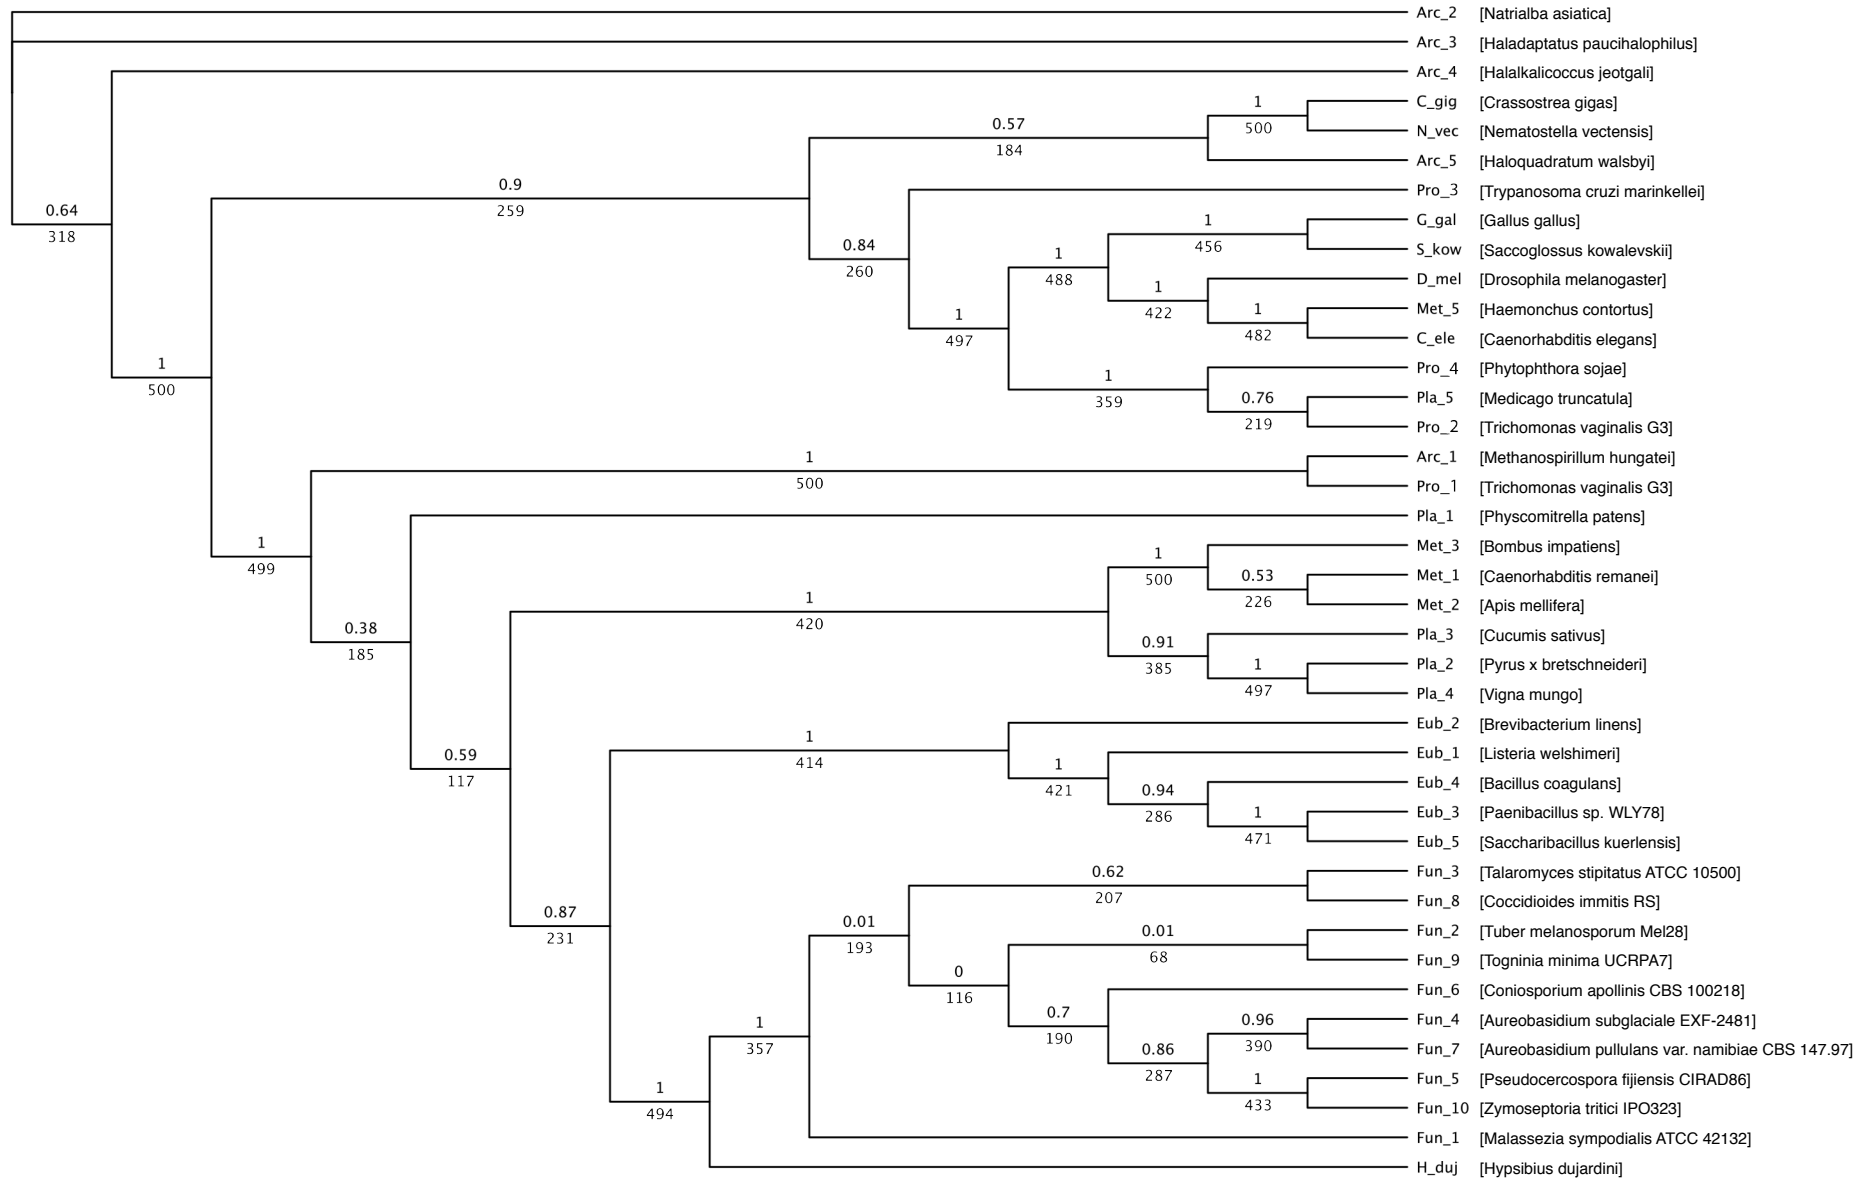

maker\_scaffold10\_size447749\_snap\_gene\_2.50

thioredoxin

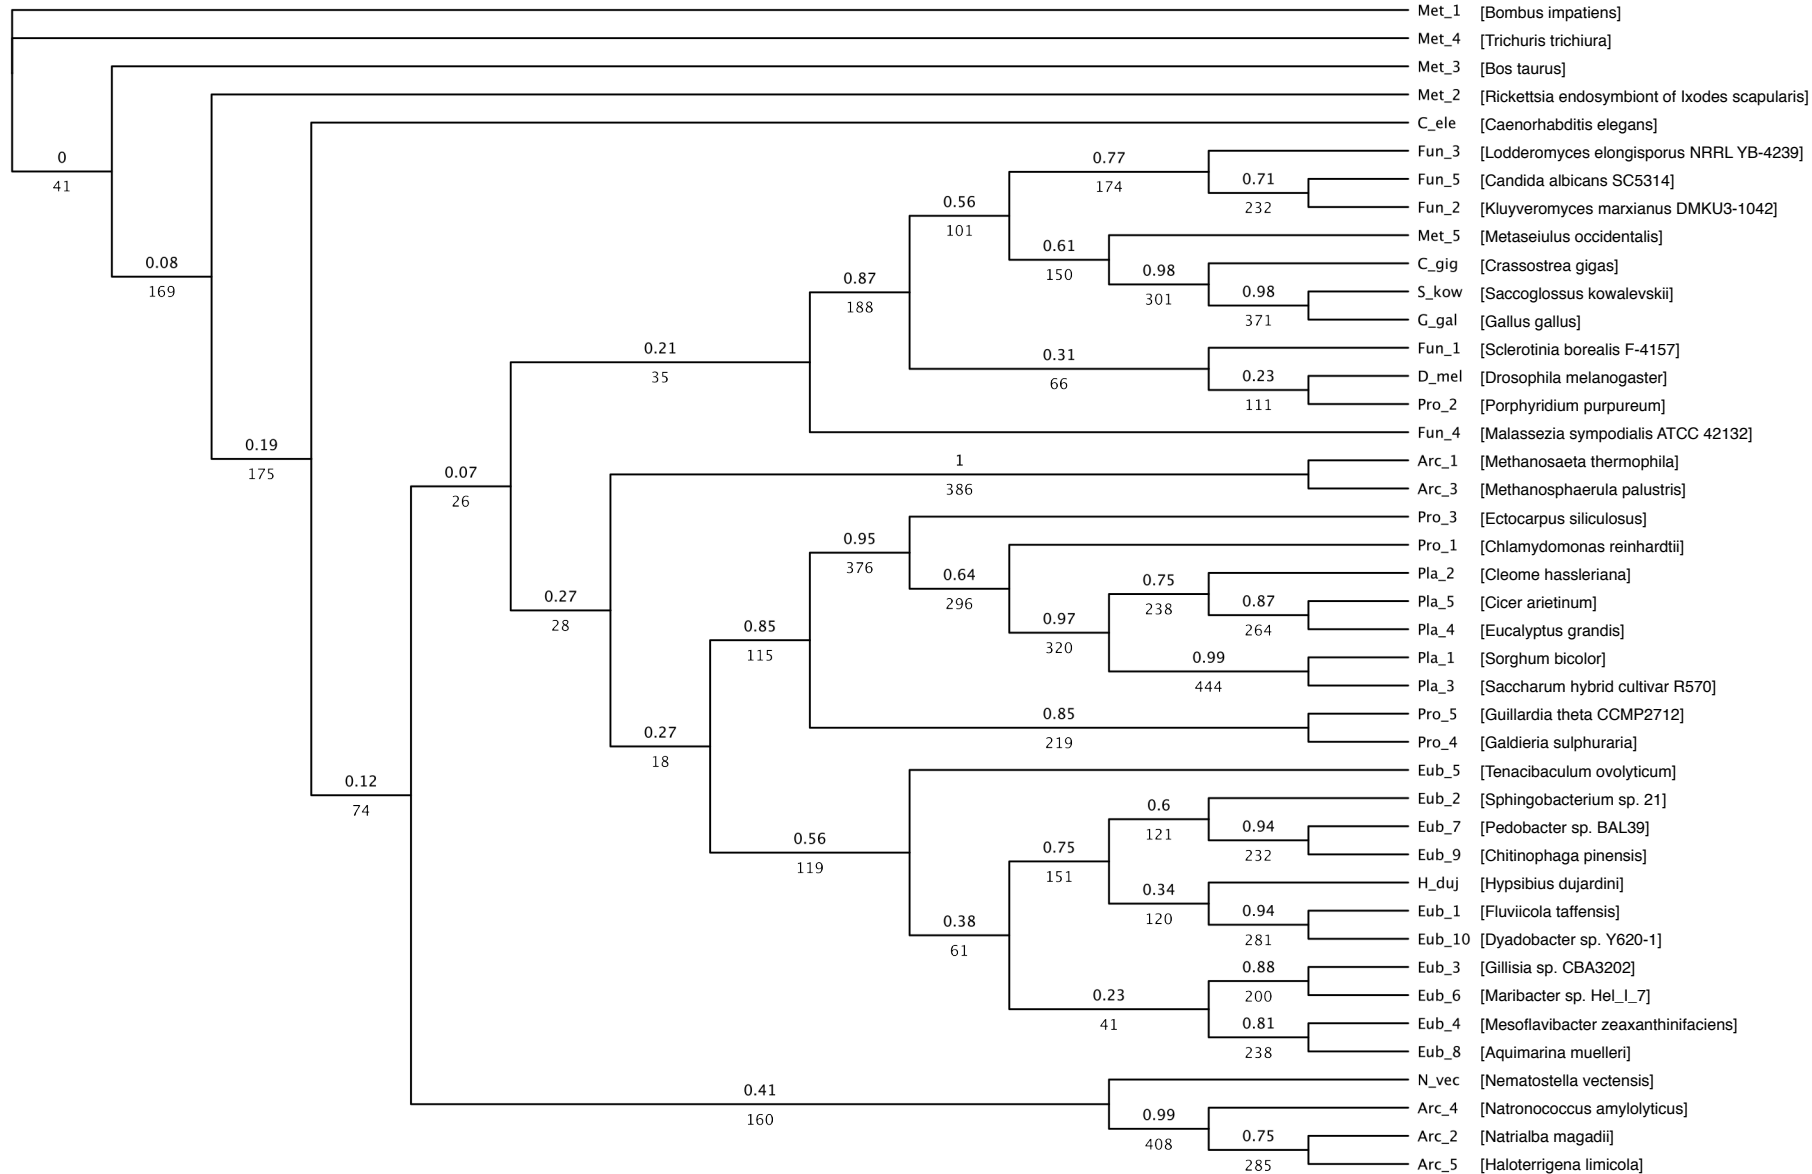

augustus\_masked-scaffold16703\_gene\_0.3

enoyl-CoA hydratase

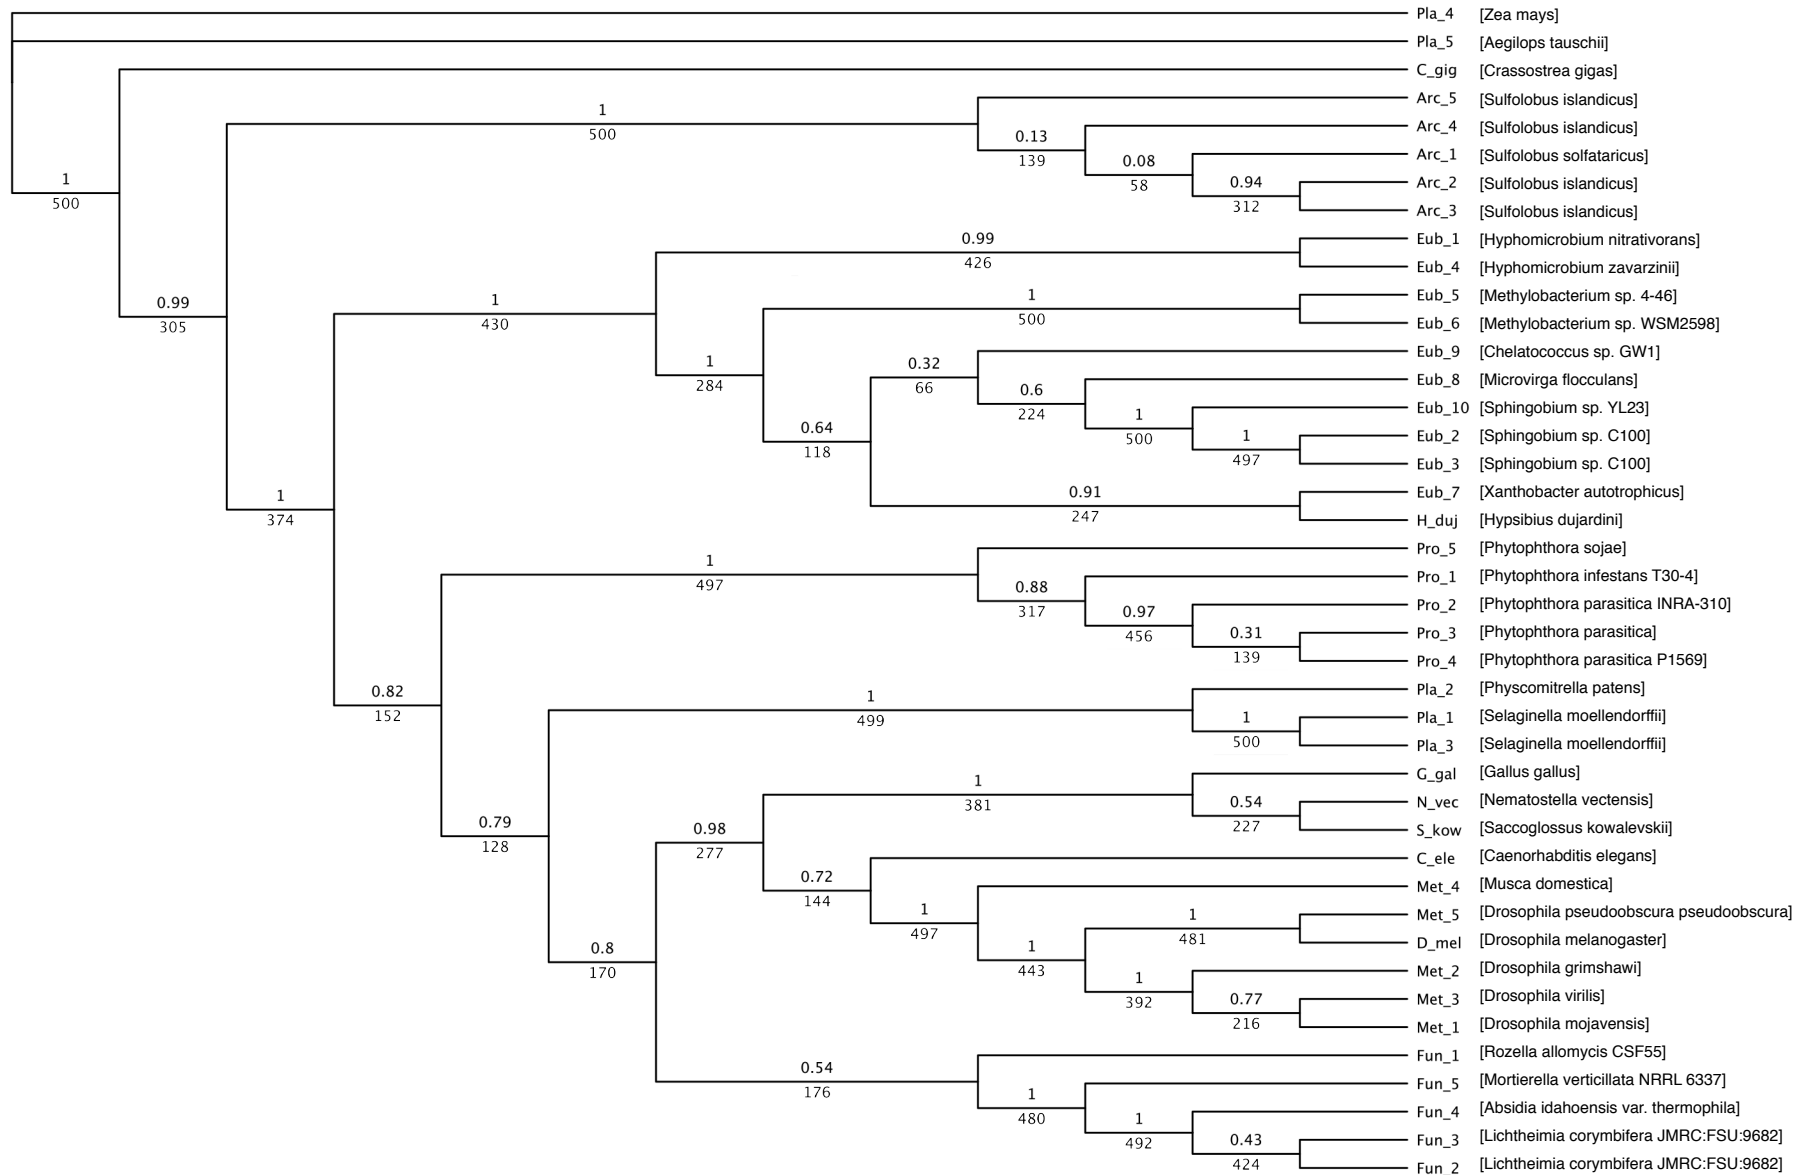

hypothetical protein

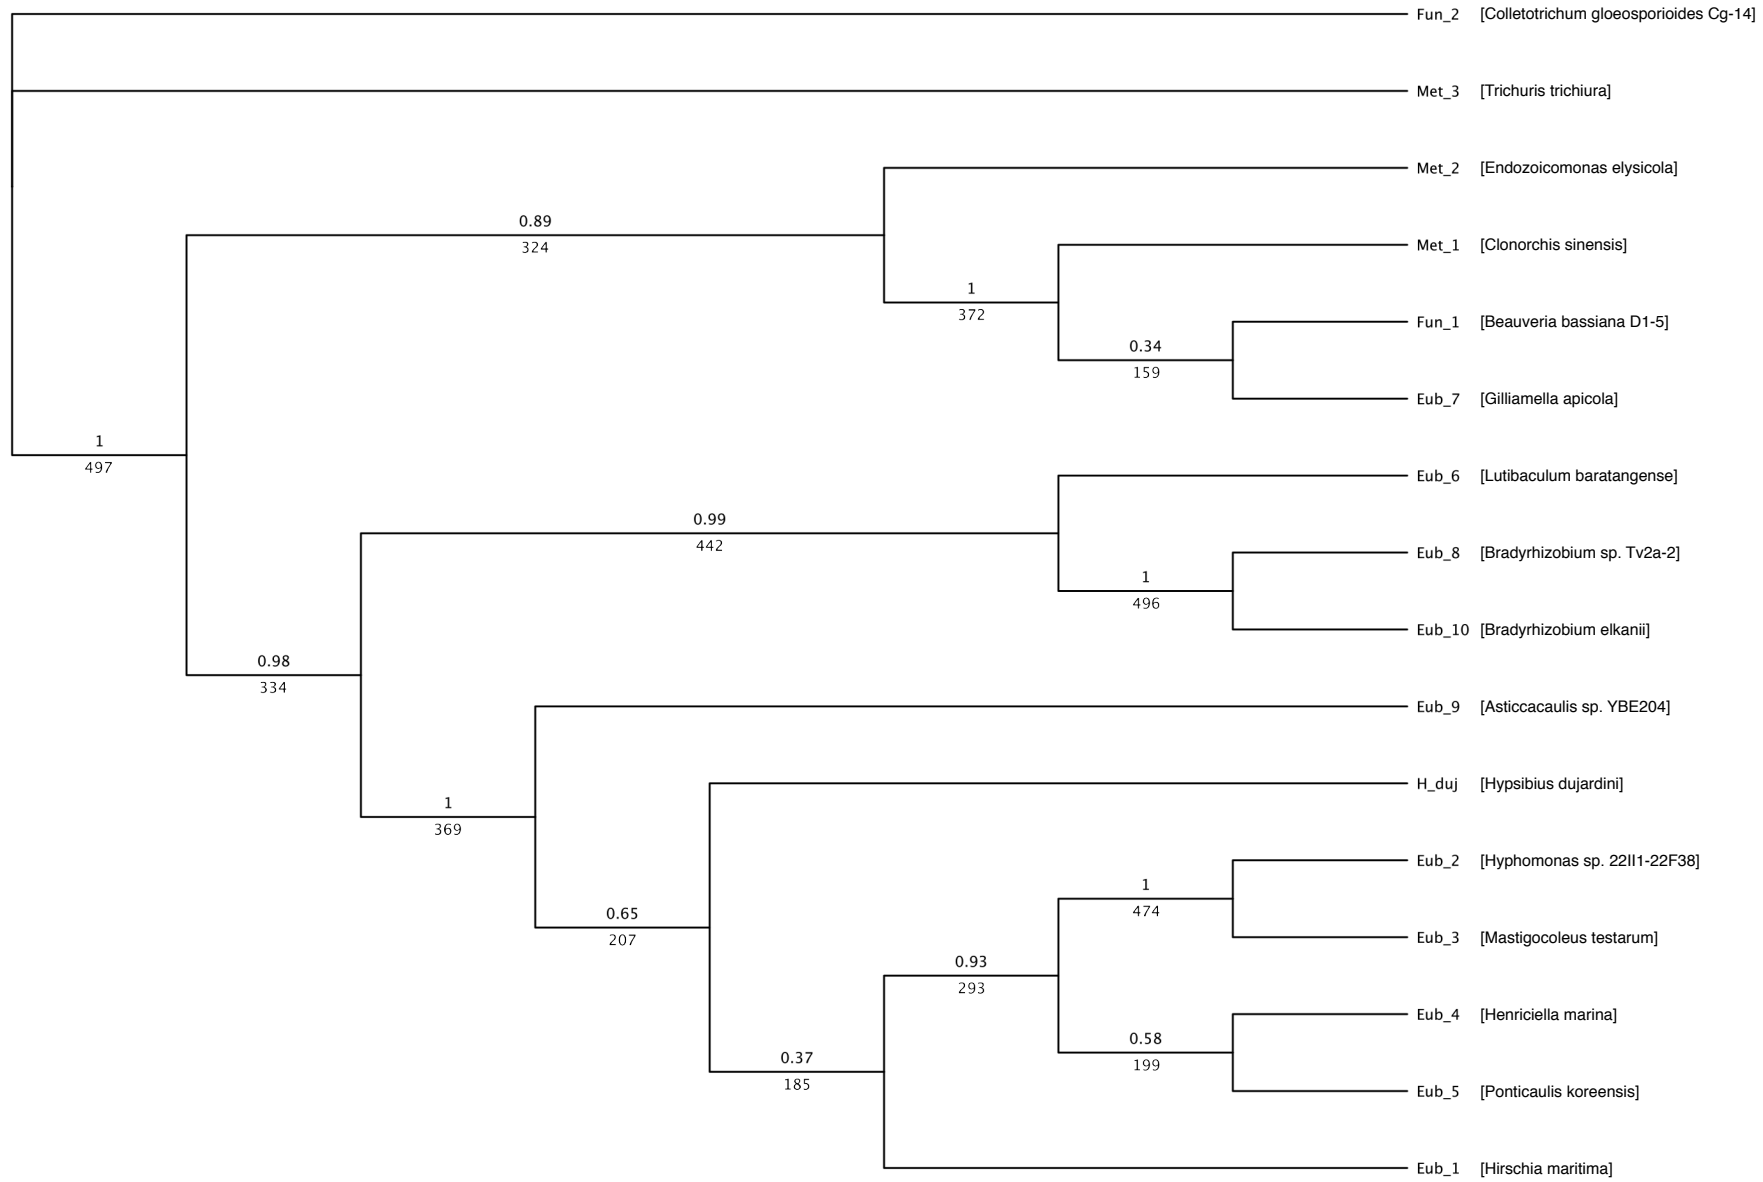

augustus\_masked\_scaffold16703\_size5213\_processed\_gene\_0.3

enoyl-CoA hydratase

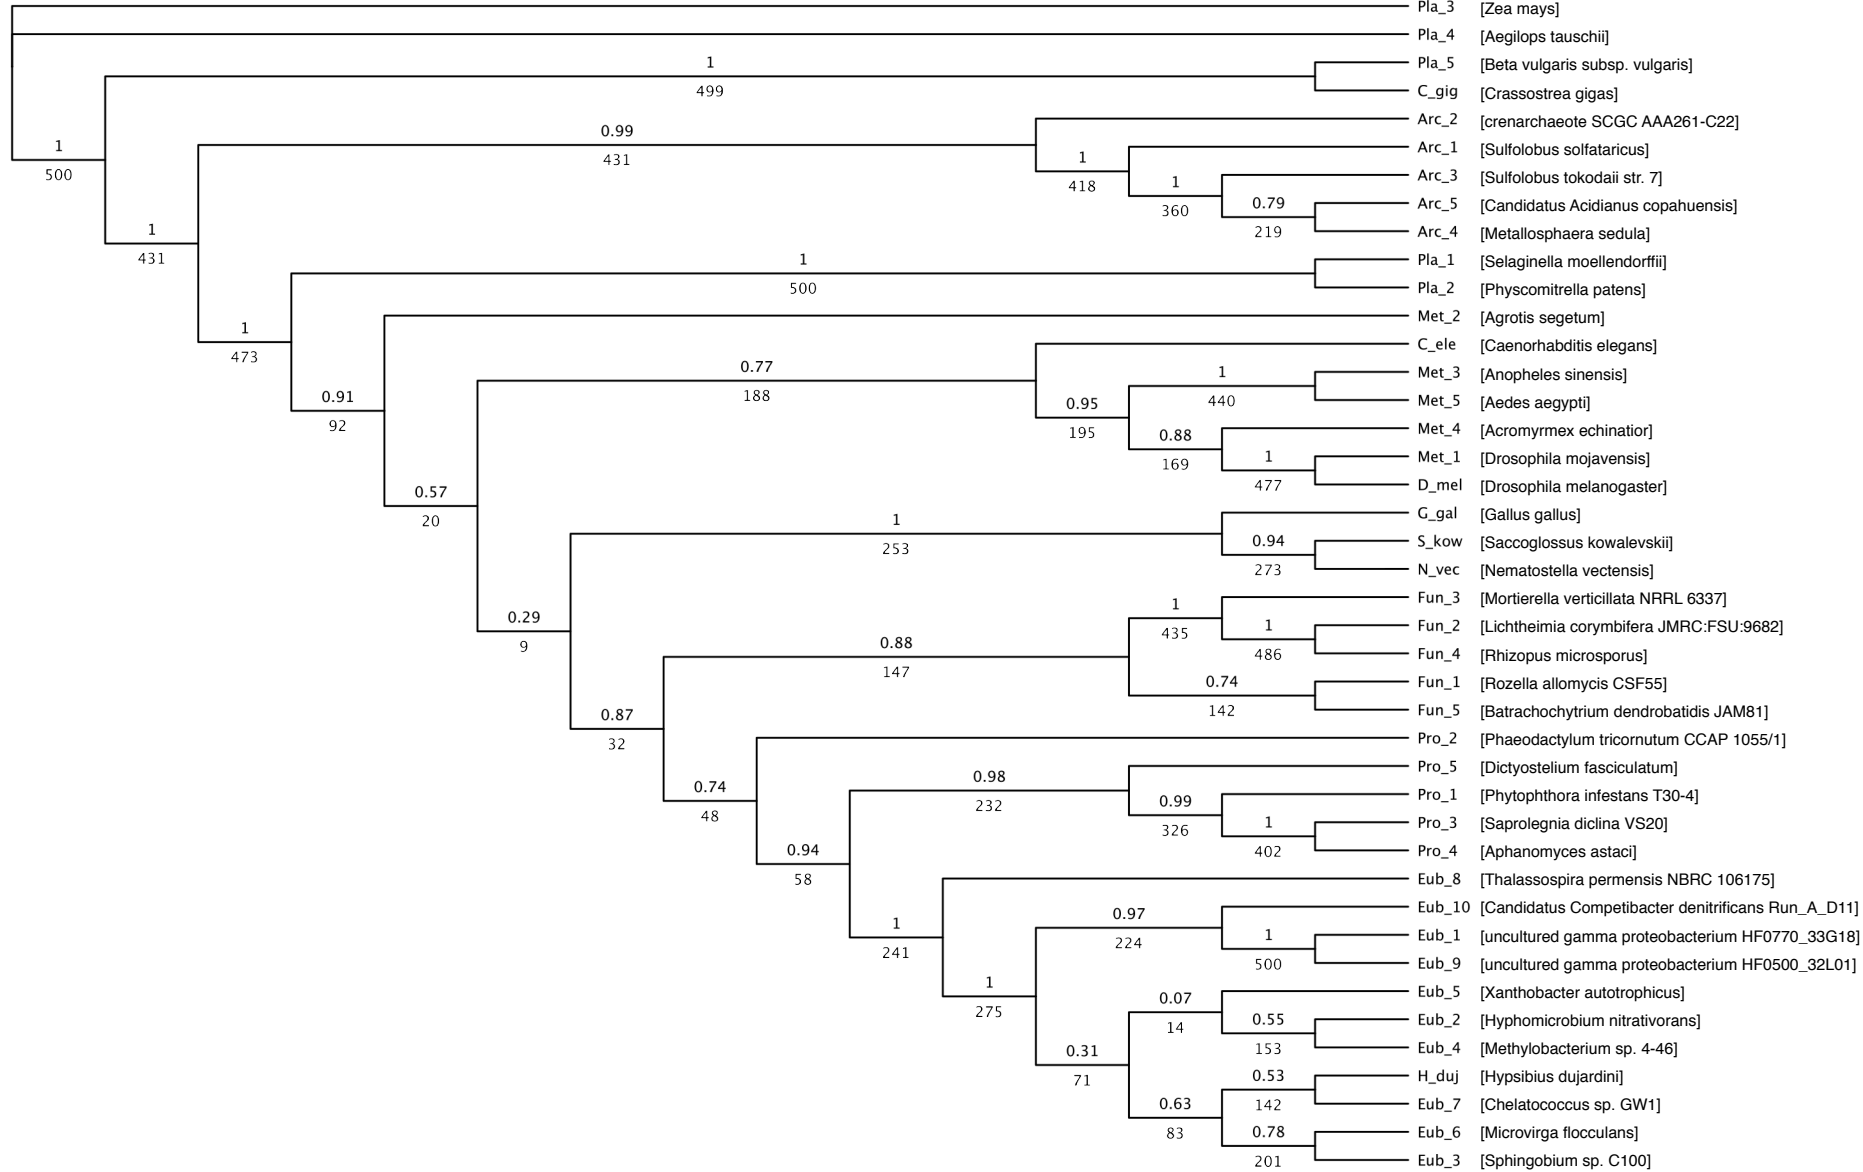

transcriptional regulator

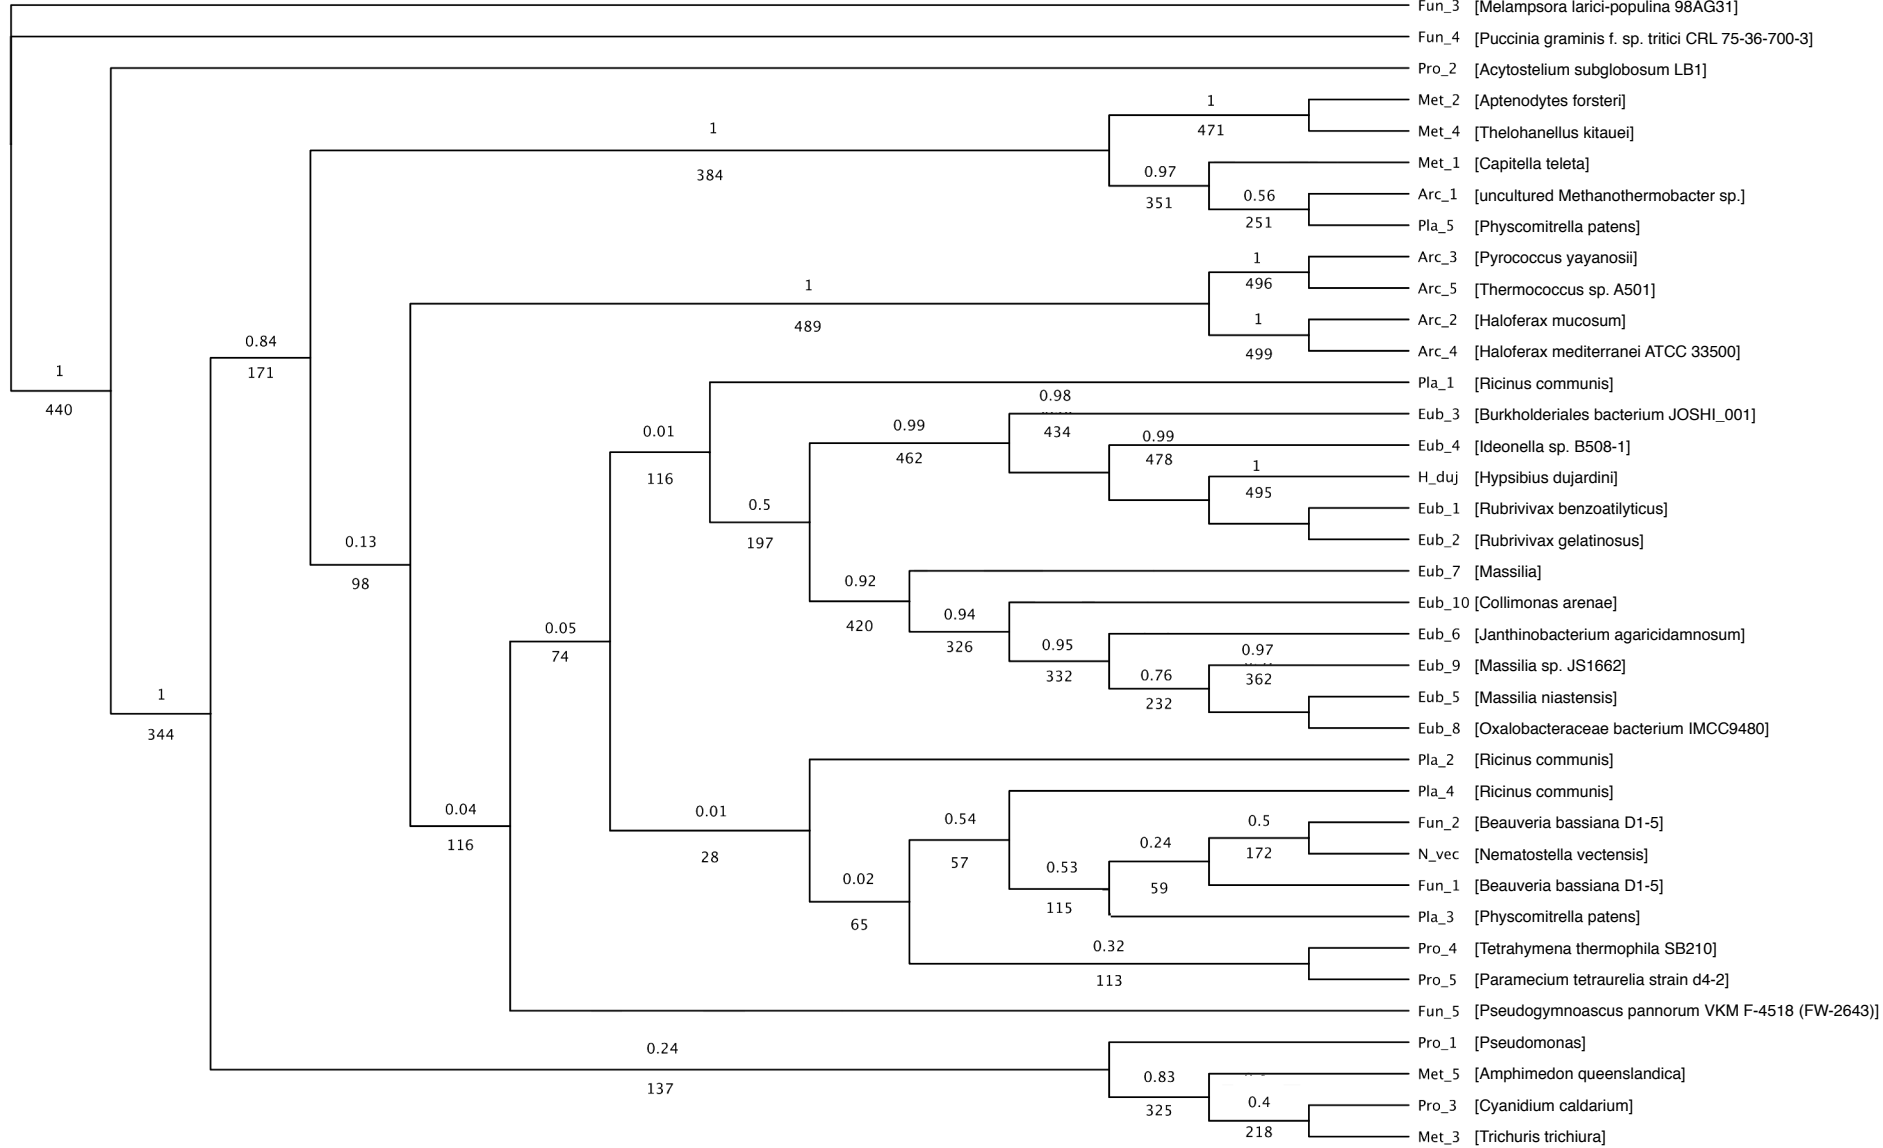



augustus\_masked\_scaffold12066\_size7863\_processed\_gene\_0.3

methionine aminopeptidase

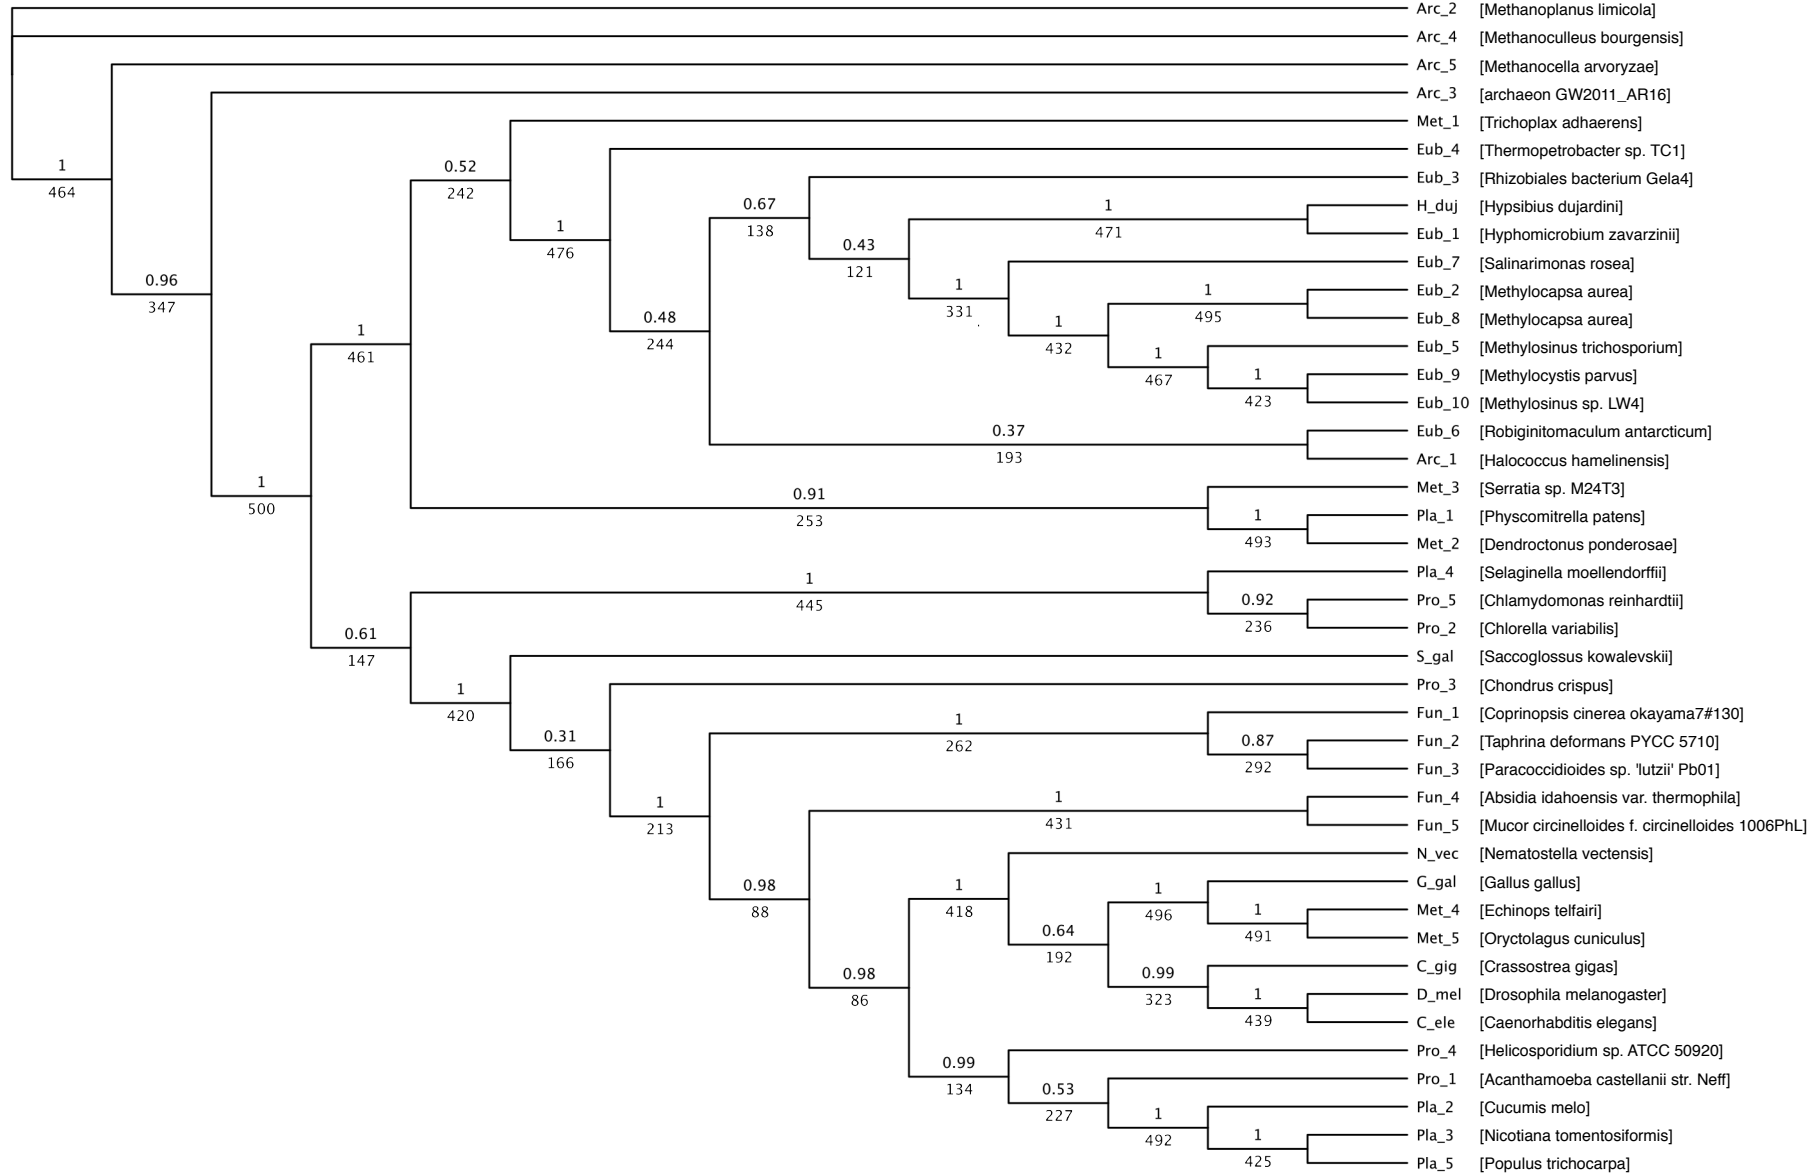

augustus\_masked\_scaffold10141\_processed\_gene\_0.1

hypothetical protein EURHEDRAFT\_467707

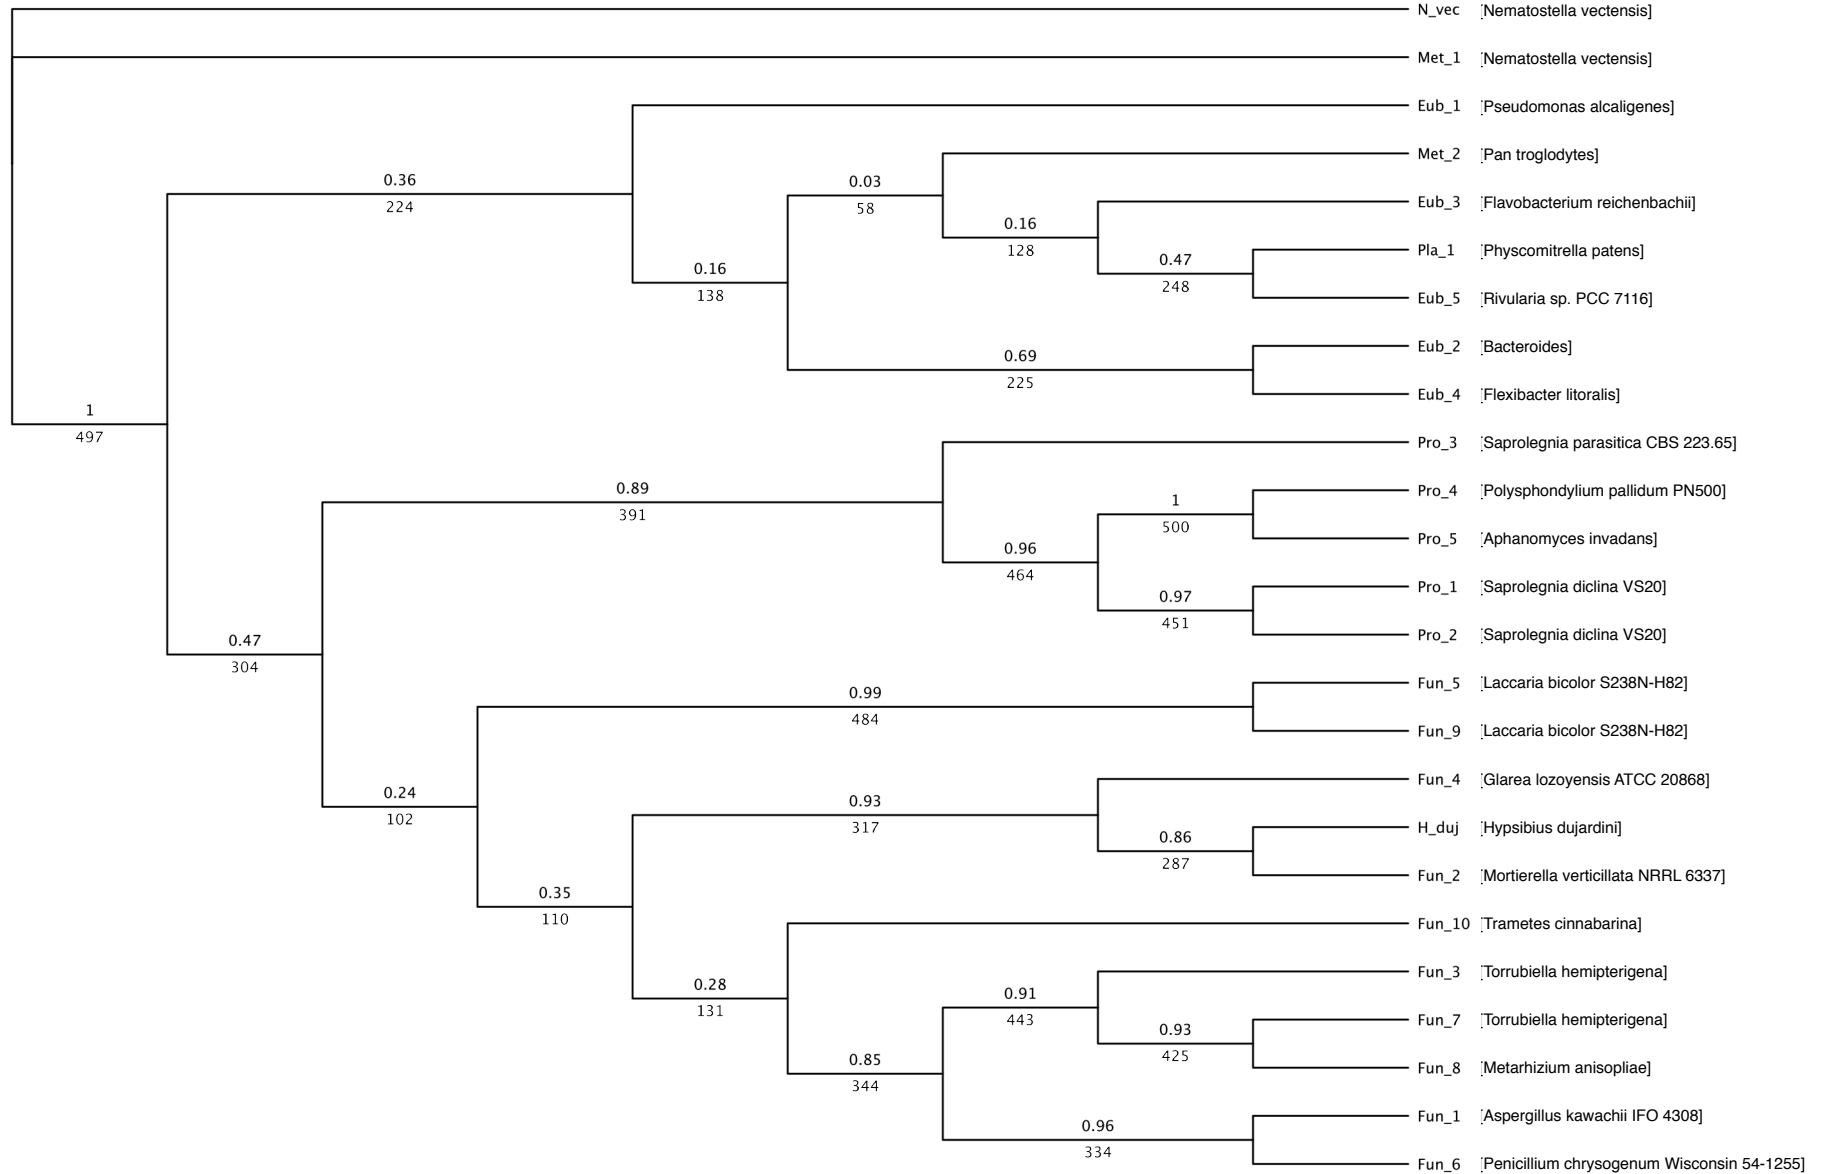

3-oxoacyl-ACP synthase

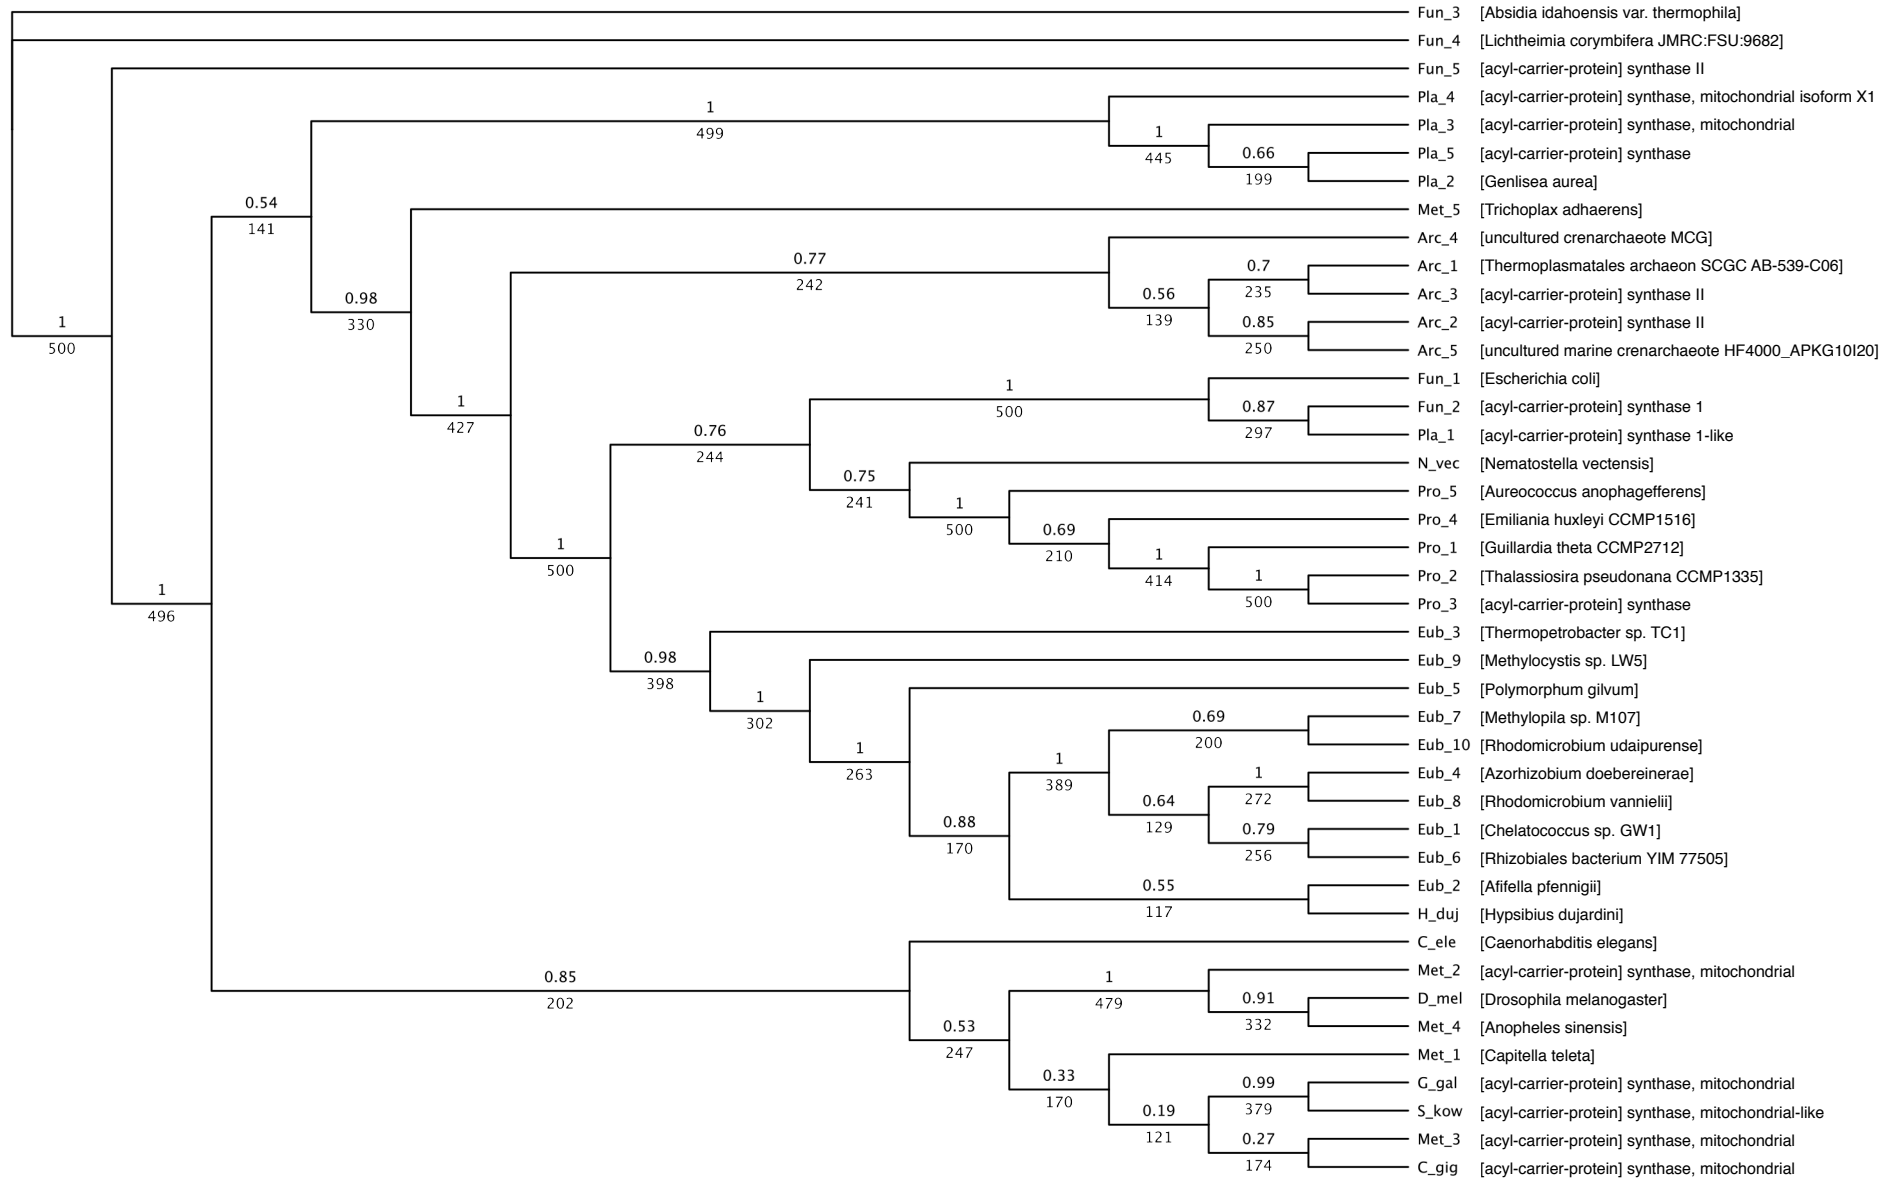

augustus\_masked\_scaffold9576\_size9323\_processed\_gene\_0.1

hypothetical protein BATDERAFT\_89188

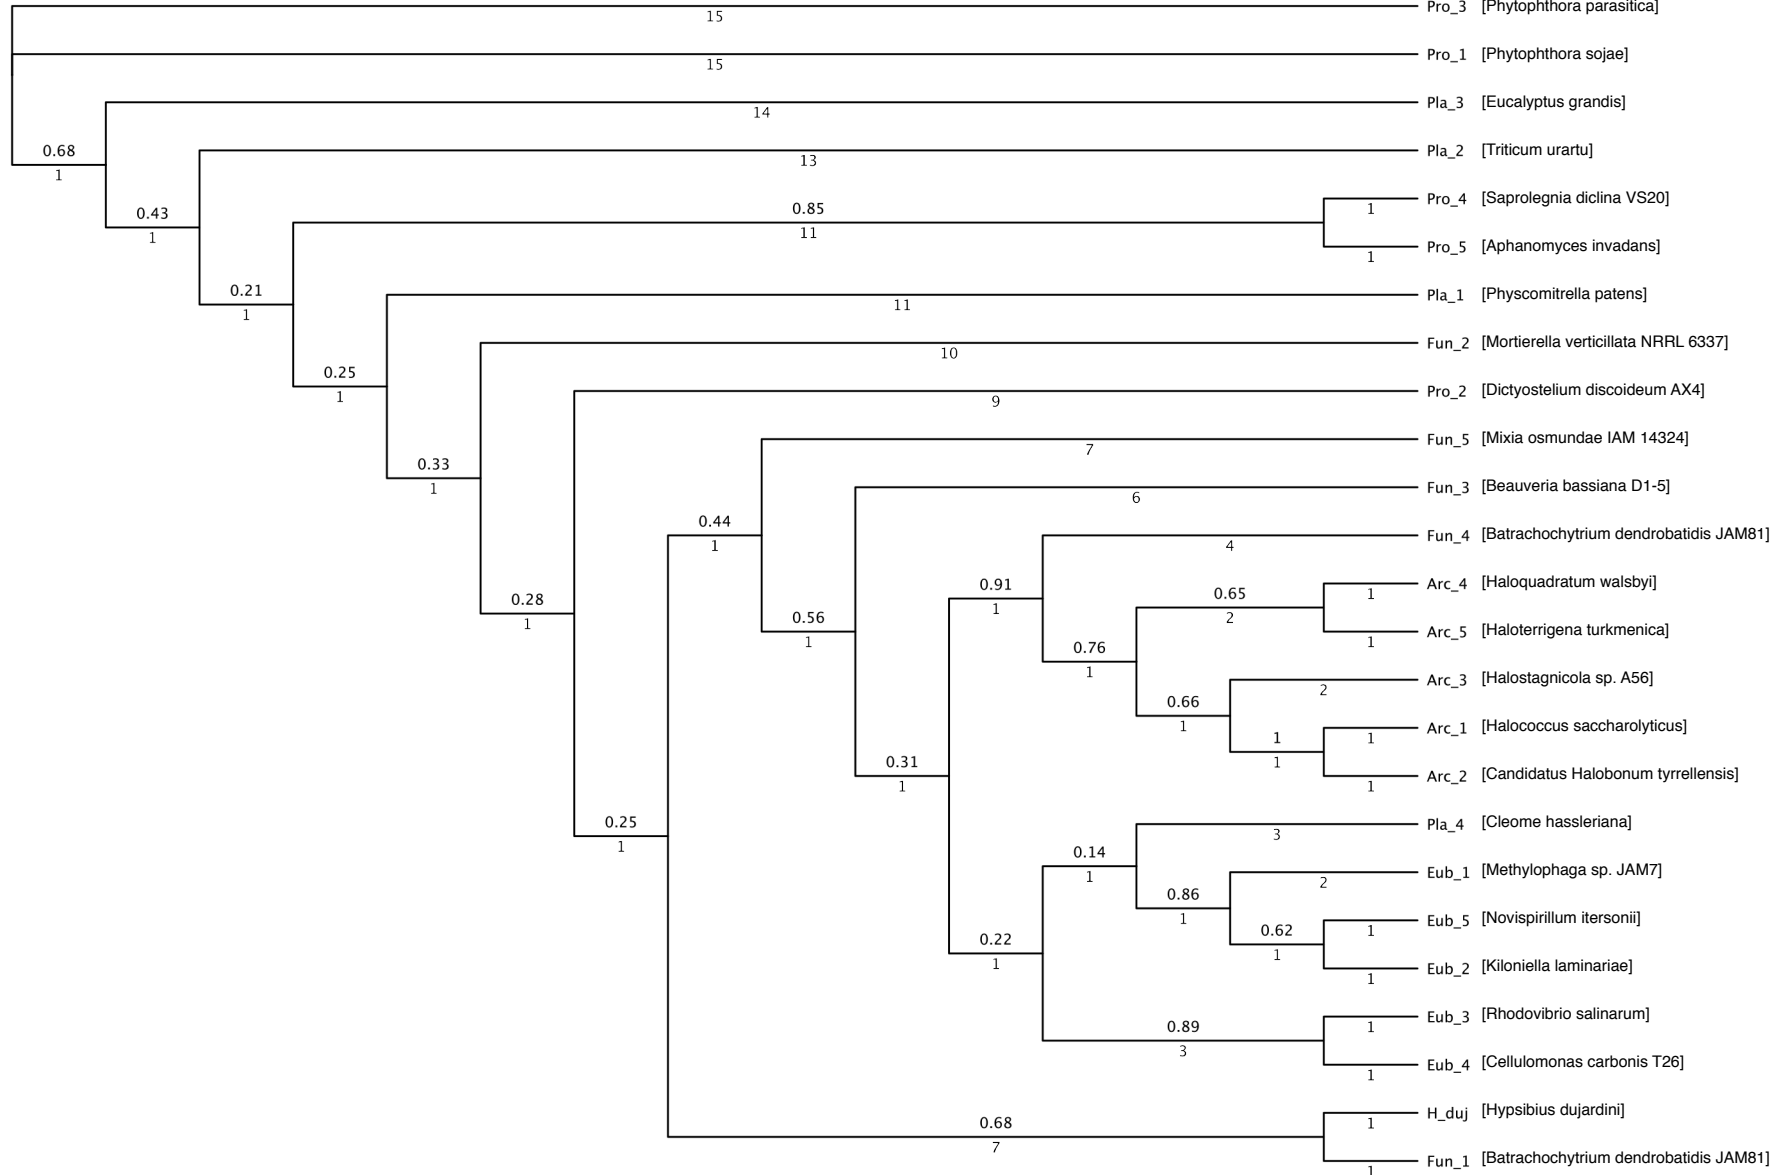

protein tyrosine phosphatase

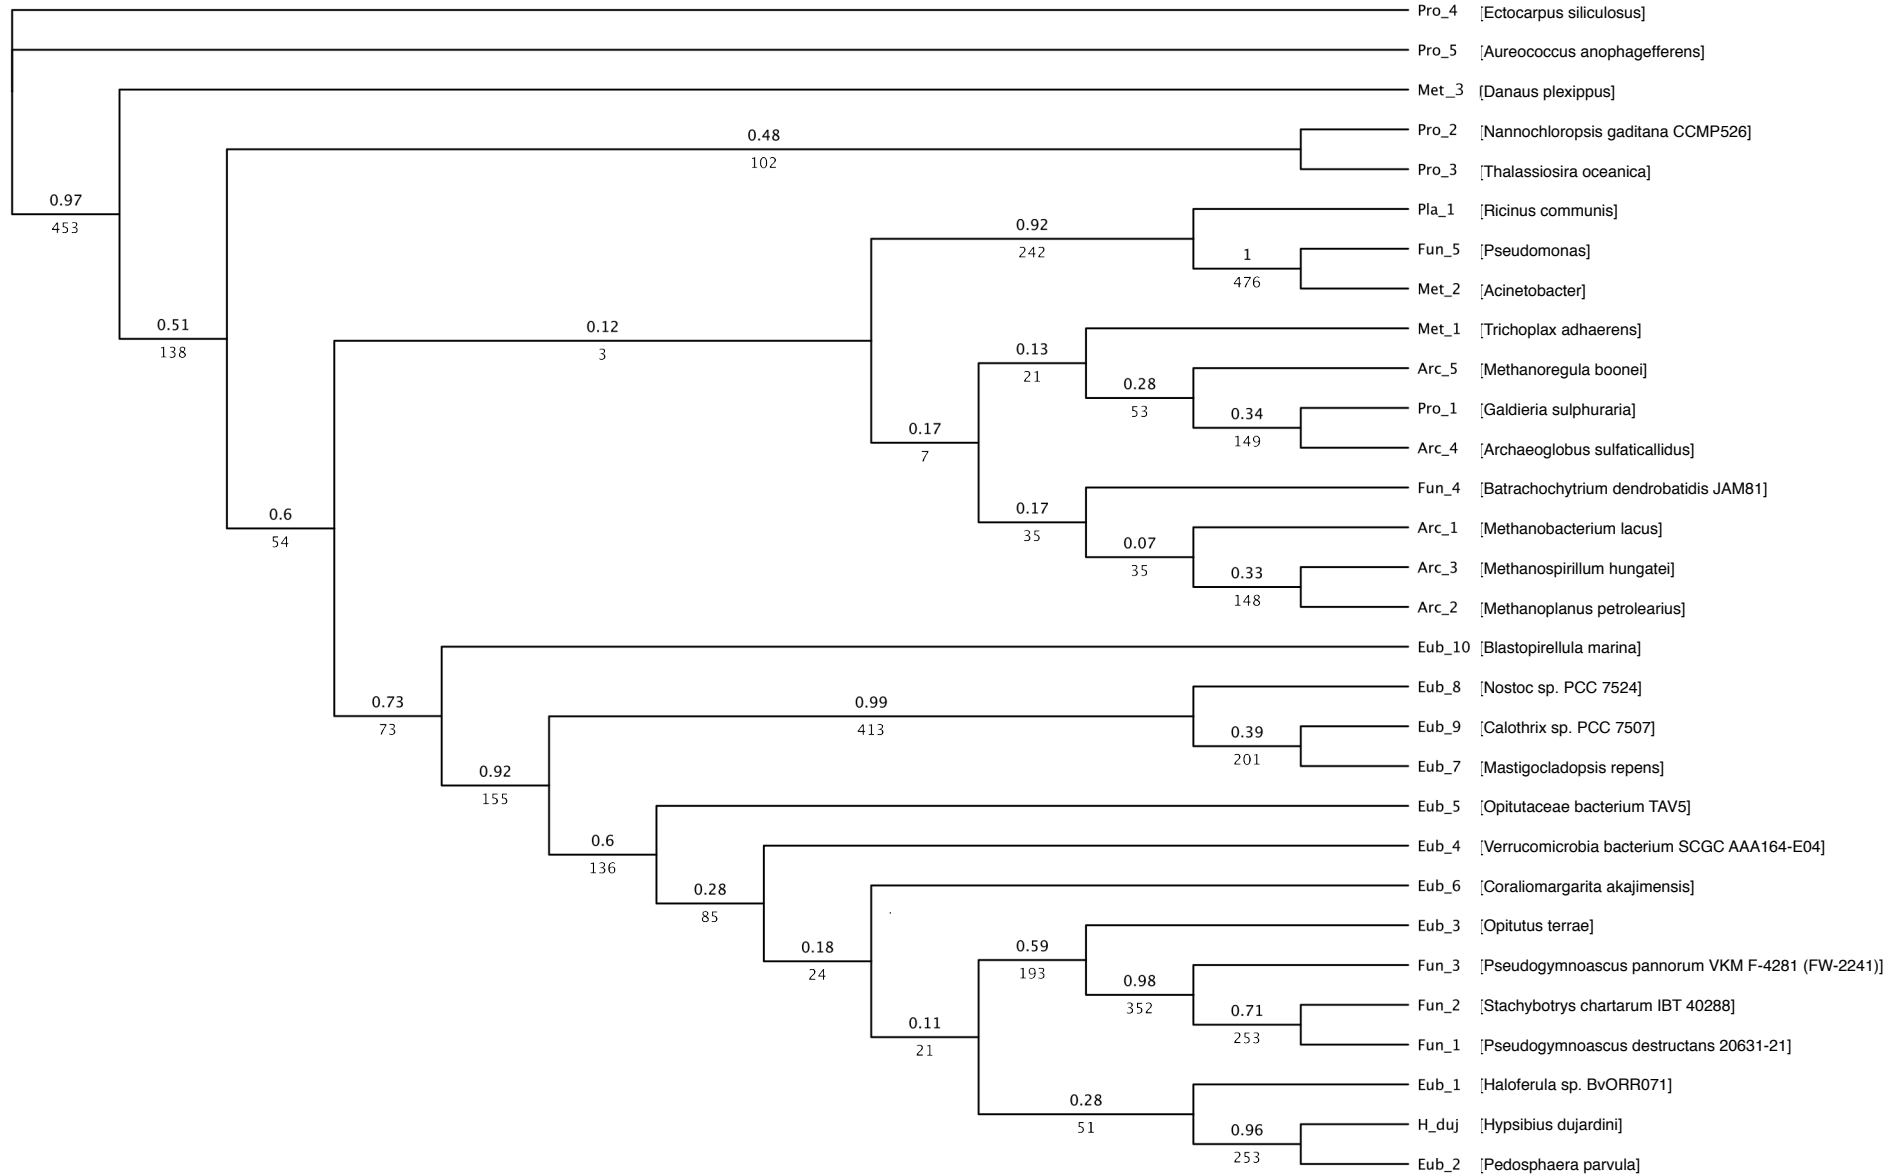

augustus\_masked\_scaffold1821\_size45607\_processed\_gene\_0.1

predicted protein

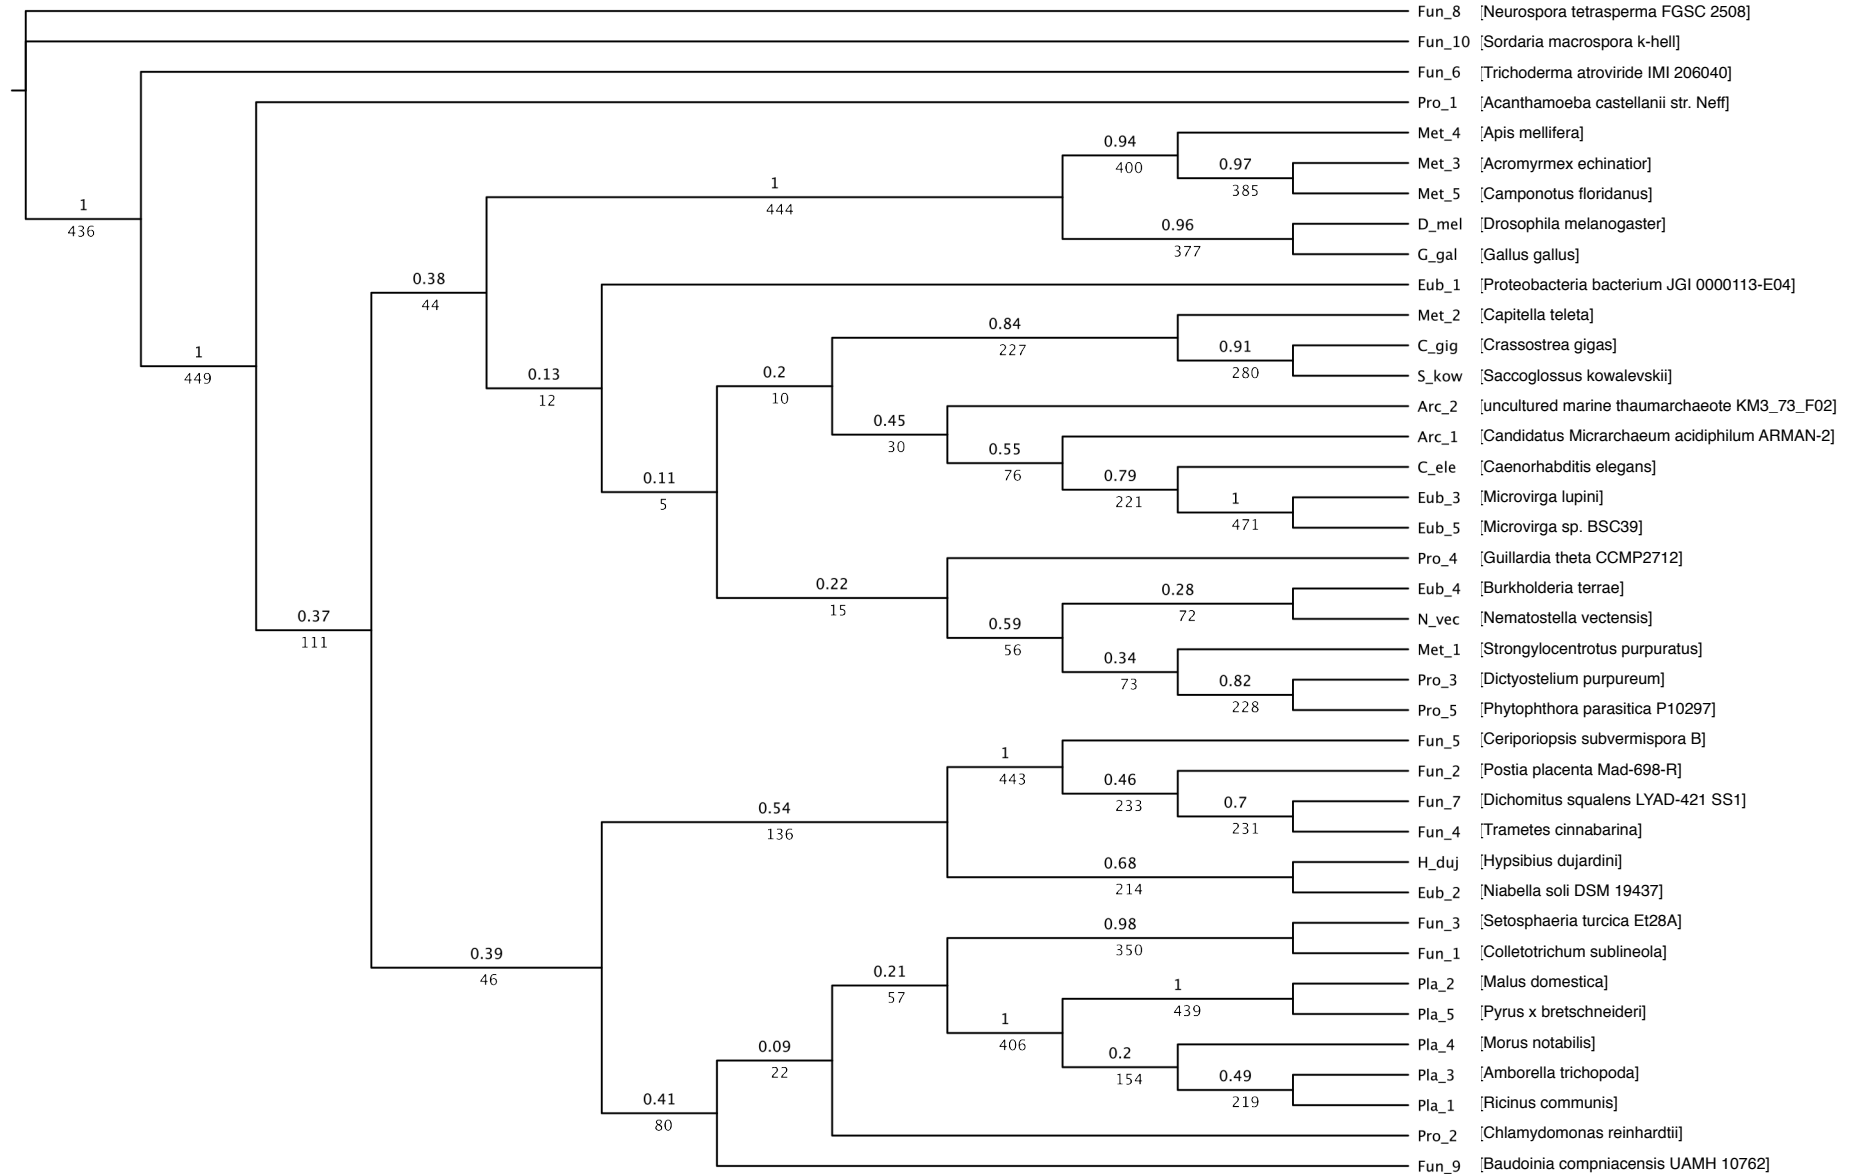

hypothetical protein mv\_R860

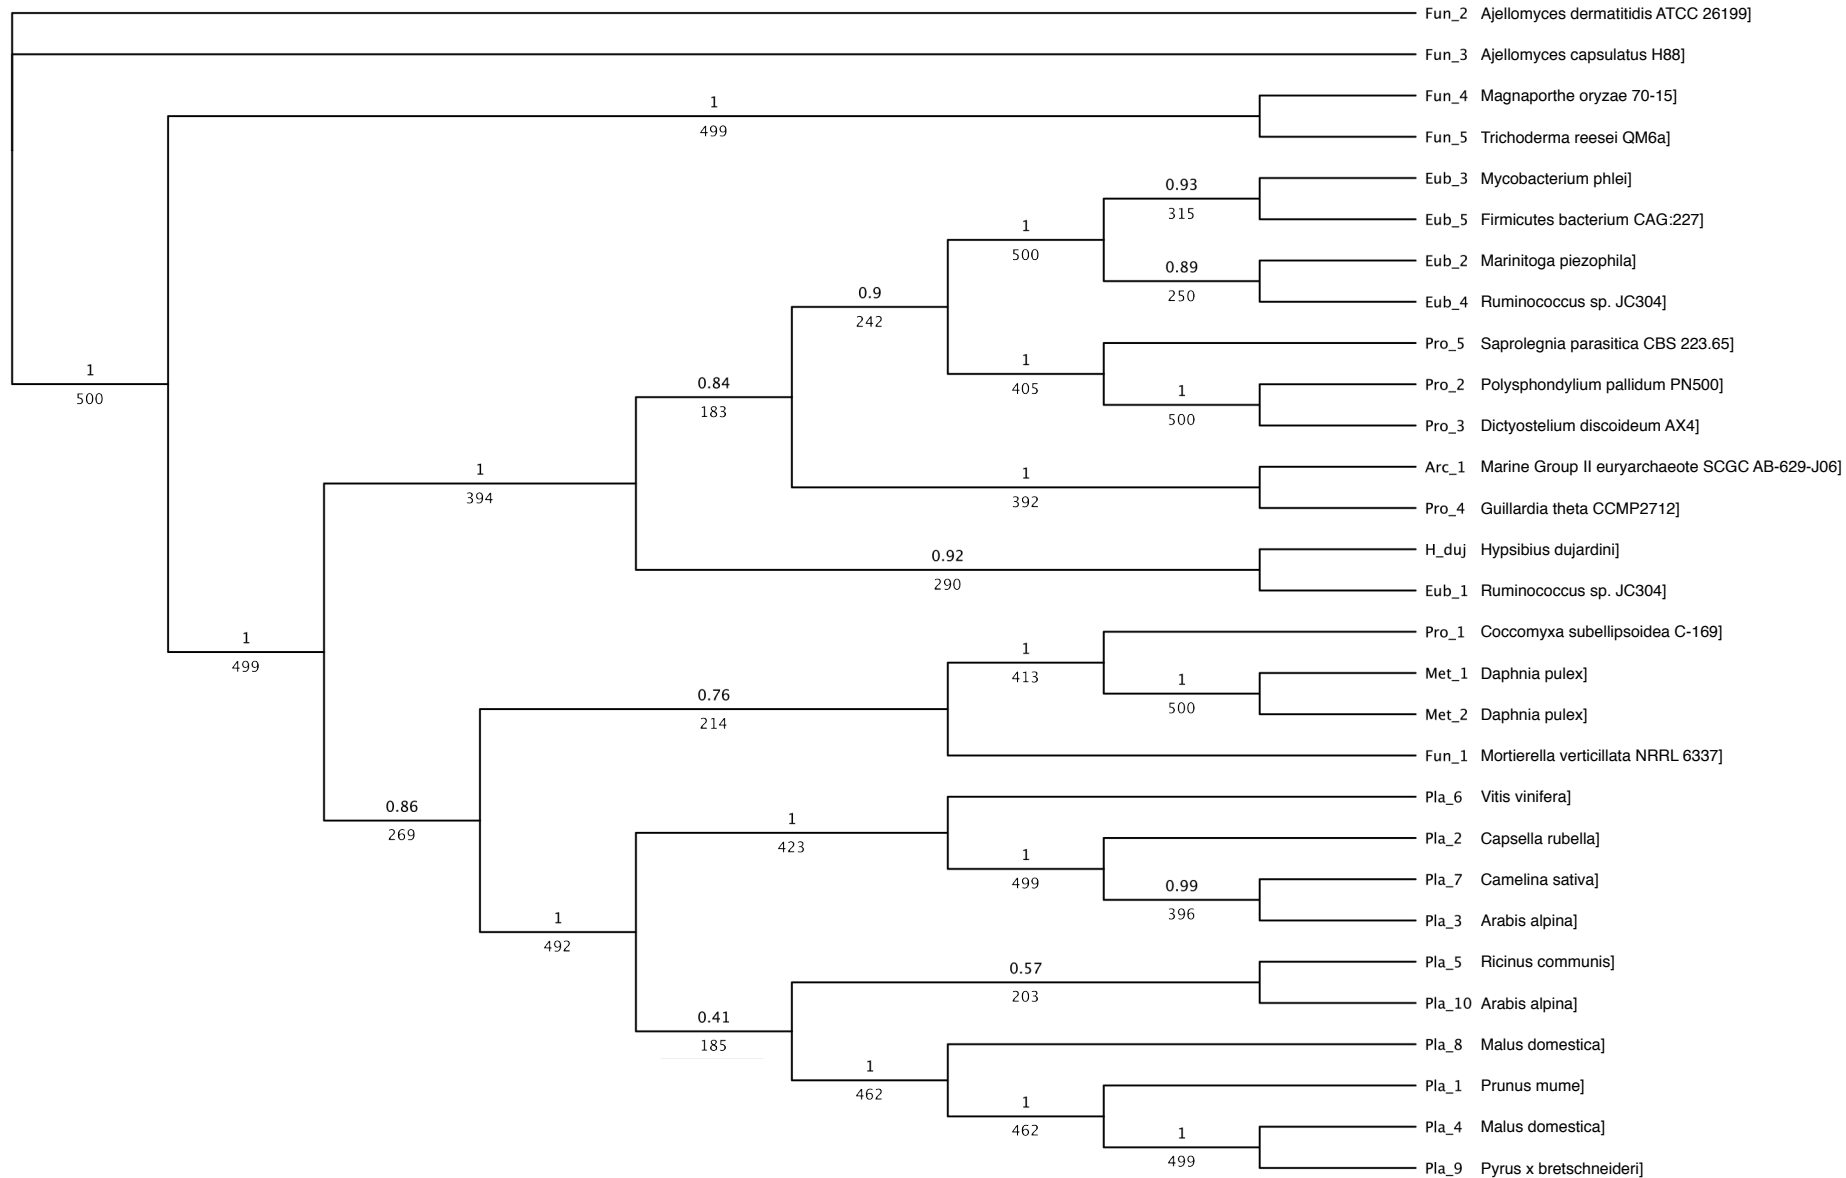

augustus\_masked\_scaffold1002\_processed\_gene\_0.4

hypothetical protein BATDEDRAFT\_8747

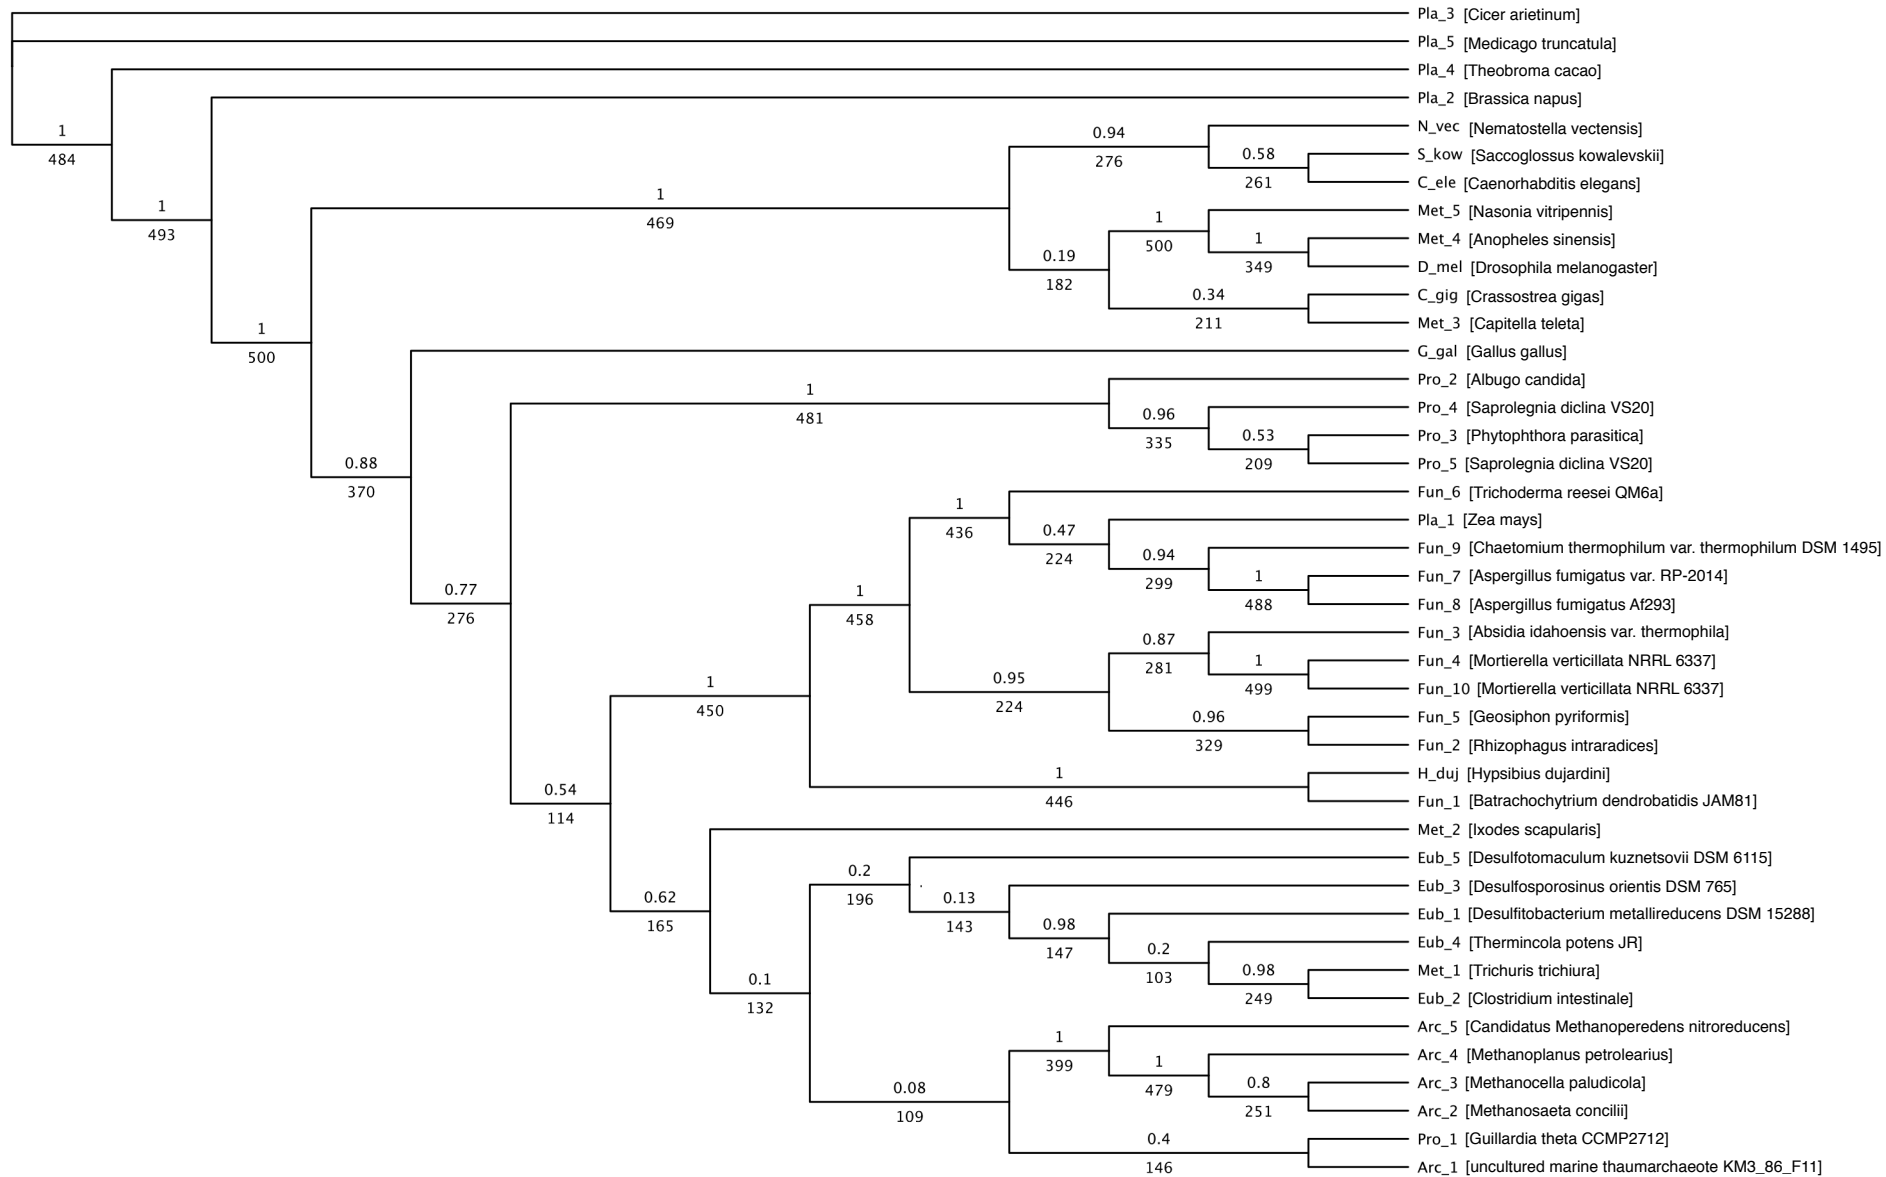



hypothetical protein mv\_R860

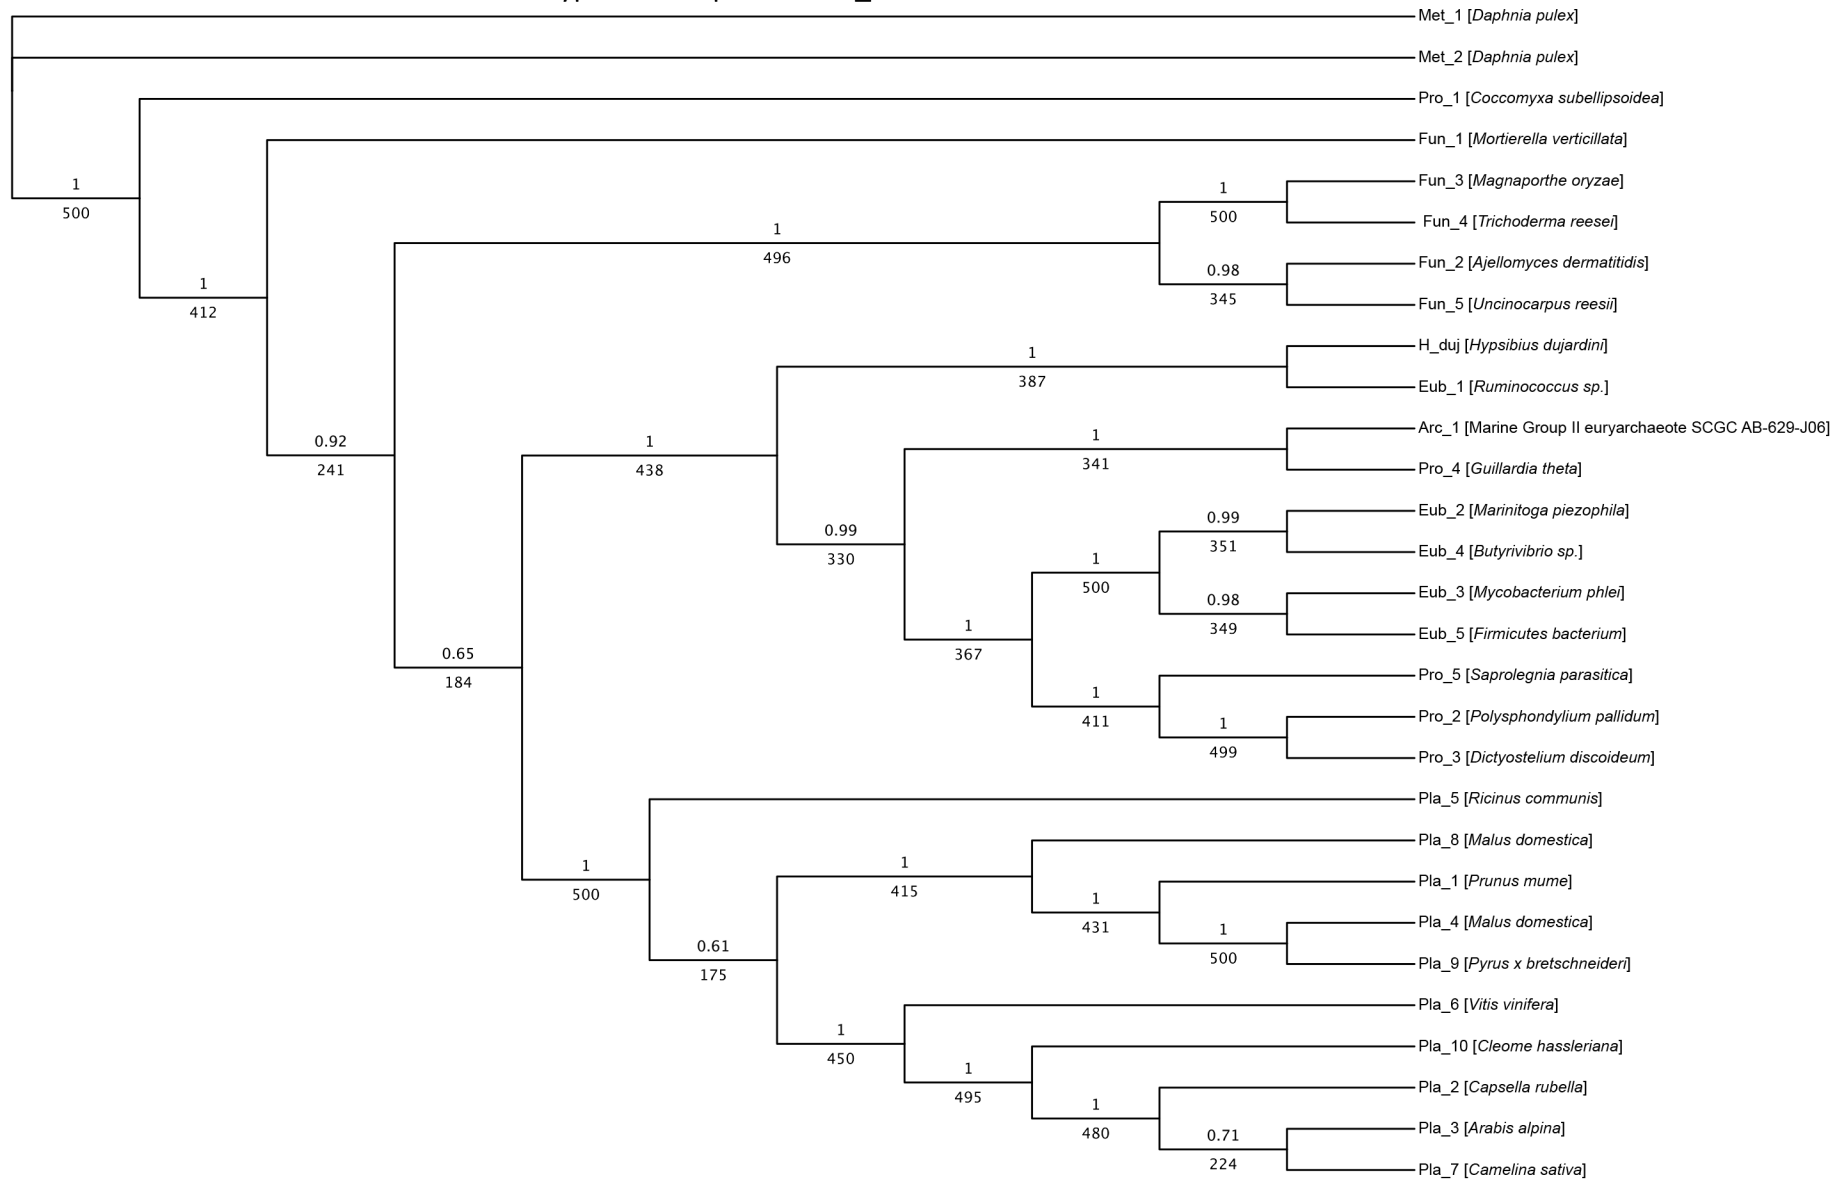

augustus\_masked\_scaffold634\_size5575\_processed\_gene\_0.11

Mannitol-1-phosphate/altronate dehydrogenase

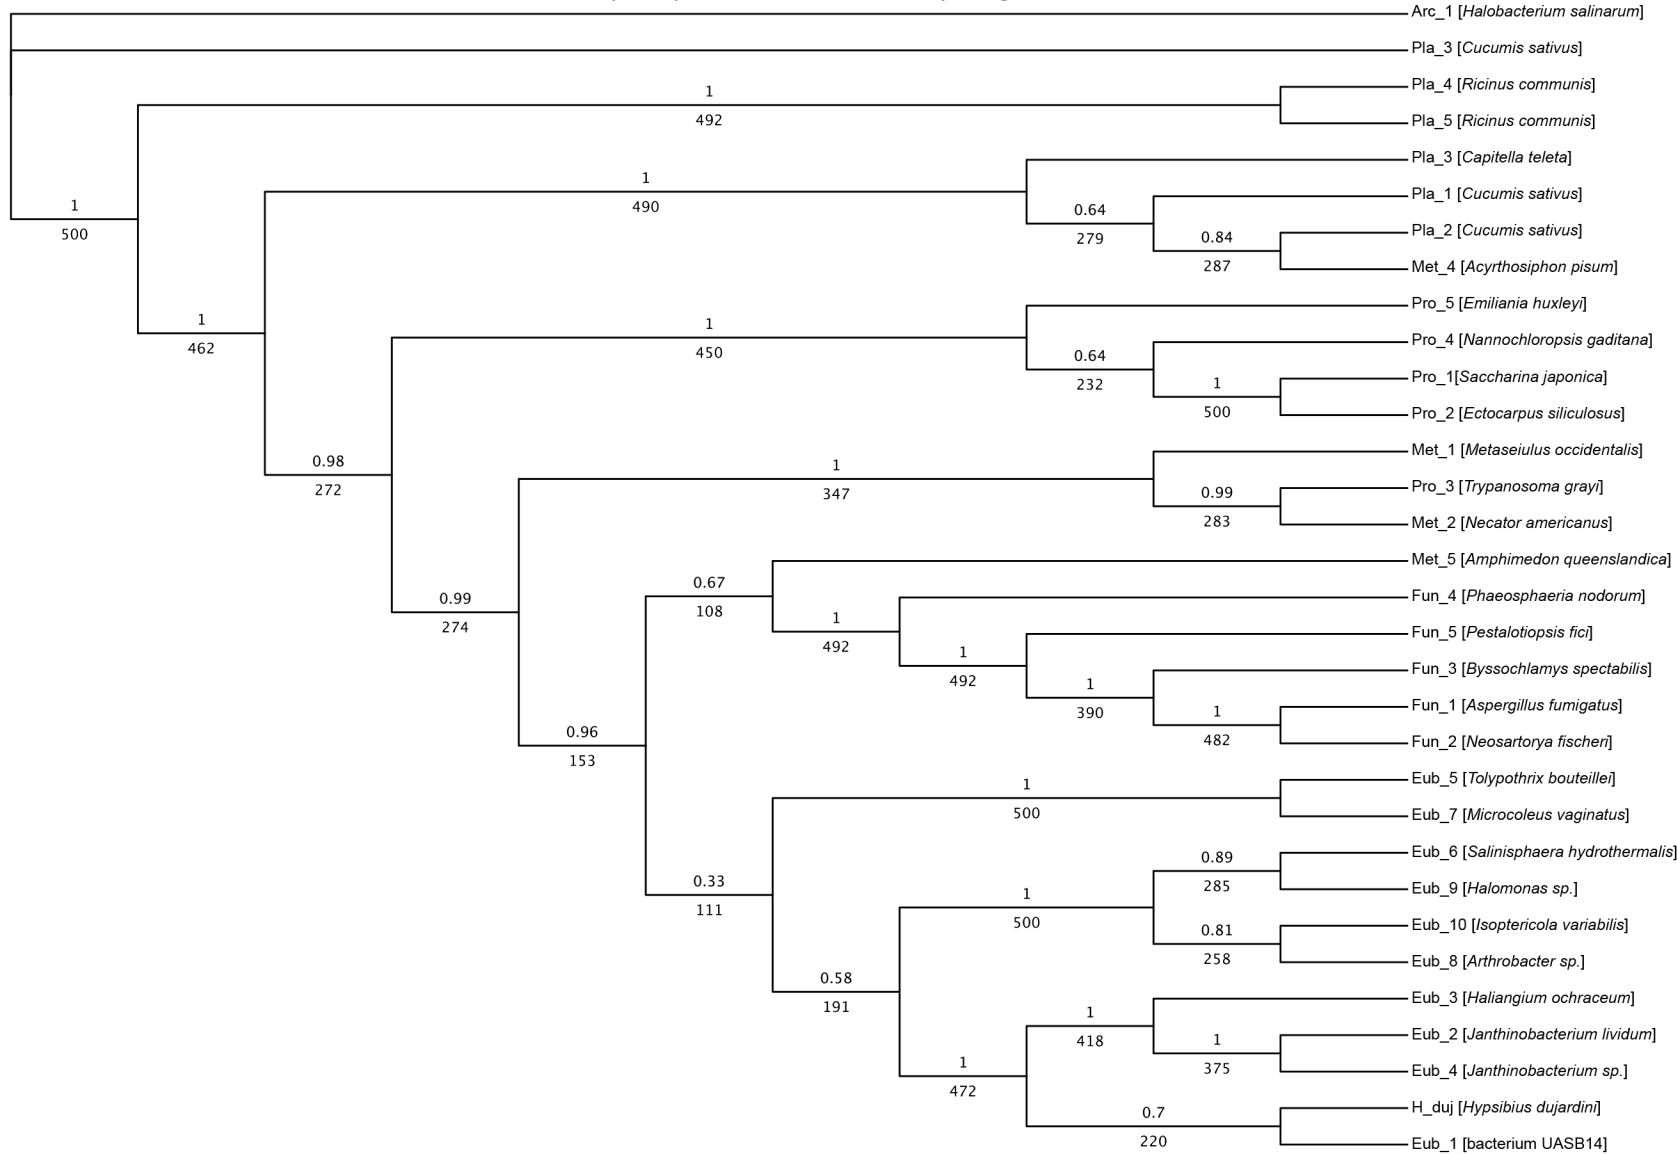

# Gene trees – associated information

| Tardgrade sequence                                    | Accession      | Taxon label in tree |
|-------------------------------------------------------|----------------|---------------------|
| snap_masked-scaffold2263_size22100-processed-gene-0.5 | ETN85160.1     | Met_1               |
|                                                       | ELT98931.1     | Met_2               |
|                                                       | EGT36150.1     | Met_3               |
|                                                       | EYC08770.1     | Met_4               |
|                                                       | EYC08771.1     | Met_5               |
|                                                       | ADK93999.1     | D_mel               |
|                                                       | NP_001024899.1 | C_ele               |
|                                                       | EKC41578.1     | C_gig               |
|                                                       | XP_002734727.1 | S_kow               |
|                                                       | XP_007831537.1 | Fun_1               |
|                                                       | XP_658924.1    | Fun_2               |
|                                                       | KDN63488.1     | Fun_3               |
|                                                       | CBF87724.1     | Fun_4               |
|                                                       | KGQ13279.1     | Fun_5               |
|                                                       | EWM25928.1     | Pro_1               |
|                                                       | XP_001759460.1 | Pla_1               |
|                                                       | WP_012186262.1 | Arch_1              |
|                                                       | WP_015789392.1 | Arch_2              |
|                                                       | WP_006665629.1 | Arch_3              |
|                                                       | WP_006882641.1 | Arch_4              |
|                                                       | WP_006825181.1 | Arch_5              |
|                                                       | YP_005059695.1 | Eub_1               |
|                                                       | CDG83135.1     | Eub_2               |
|                                                       | WP_013579287.1 | Eub_3               |
|                                                       | WP_020719291.1 | Eub_4               |
|                                                       | YP_005058755.1 | Eub_5               |
|                                                       | WP_026389091.1 | Eub_6               |
|                                                       | YP_006421272.1 | Eub_7               |
|                                                       | WP_028556452.1 | Eub_8               |
|                                                       | WP_011682943.1 | Eub_9               |
|                                                       | WP_013568038.1 | Eub_10              |
| maker-scaffold187_size82271-snap-gene-0.46            | XP_003343631.1 | Fun_1               |
|                                                       | XP_001744264.1 | Pro_1               |
|                                                       | YP_589610.1    | Eub_1               |
|                                                       | YP_002754580.1 | Eub_2               |
|                                                       | WP_020722206.1 | Eub_3               |
|                                                       | WP_013578580.1 | Eub_4               |
|                                                       | WP_011688571.1 | Eub_5               |
|                                                       | YP_005059566.1 | Eub_6               |
|                                                       | WP_020712994.1 | Eub_7               |
|                                                       | WP_006978381.1 | Eub_8               |
|                                                       | WP_012376870.1 | Eub_9               |
|                                                       | YP_001821414.1 | Eub_10              |
| snap_masked-scaffold16703_size5213-processed-gene-0.5 | XP_003391632.1 | Met_1               |

|                                            |                |        |
|--------------------------------------------|----------------|--------|
|                                            | XP_002405928.1 | Met_2  |
|                                            | CDW59243.1     | Met_3  |
|                                            | XP_002434443.1 | Met_4  |
|                                            | XP_003469451.2 | Met_5  |
|                                            | KGQ12990.1     | Fun_1  |
|                                            | ELR03114.1     | Fun_2  |
|                                            | KGQ13718.1     | Fun_3  |
|                                            | XP_002617391.1 | Fun_4  |
|                                            | ELQ40159.1     | Fun_5  |
|                                            | YP_002048675.1 | Pro_1  |
|                                            | EMH73293.1     | Pro_2  |
|                                            | EKG06894.1     | Pro_3  |
|                                            | ESS63401.1     | Pro_4  |
|                                            | XP_004153787.1 | Pla_1  |
|                                            | KFK36644.1     | Pla_2  |
|                                            | XP_007207021.1 | Pla_3  |
|                                            | WP_018034704.1 | Arc_1  |
|                                            | WP_008365813.1 | Arc_2  |
|                                            | YP_007912694.1 | Eub_1  |
|                                            | WP_013945660.1 | Eub_2  |
|                                            | YP_003754151.1 | Eub_3  |
|                                            | WP_026867960.1 | Eub_4  |
|                                            | WP_023785623.1 | Eub_5  |
|                                            | KAI95030.1     | Eub_6  |
|                                            | YP_004010392.1 | Eub_7  |
|                                            | WP_028162525.1 | Eub_8  |
|                                            | WP_024584553.1 | Eub_9  |
|                                            | WP_027279200.1 | Eub_10 |
| maker-scaffold16610_size5253-snap-gene-0.7 | XP_009009293.1 | Met_1  |
|                                            | CBY12957.1     | Met_2  |
|                                            | KFM58494.1     | Met_3  |
|                                            | XP_004227501.1 | Met_4  |
|                                            | XP_009057605.1 | Met_5  |
|                                            | NP_001247377.1 | D_mel  |
|                                            | NP_001021293.2 | C_ele  |
|                                            | EKC31672.1     | C_gig  |
|                                            | XP_006819680.1 | S_kow  |
|                                            | NP_001025511.1 | G_gal  |
|                                            | CCH23110.1     | N_vec  |
|                                            | CCH44043.1     | Fun_1  |
|                                            | XP_007757298.1 | Fun_2  |
|                                            | CEF77135.1     | Fun_3  |
|                                            | XP_388900.1    | Fun_4  |
|                                            | EYB29890.1     | Fun_5  |
|                                            | EPY28623.1     | Pro_1  |

|                                             |                |        |
|---------------------------------------------|----------------|--------|
|                                             | XP_009845357.1 | Pro_2  |
|                                             | XP_008893292.1 | Pro_3  |
|                                             | ETO73763.1     | Pro_4  |
|                                             | XP_008893294.1 | Pro_5  |
|                                             | XP_002534659.1 | Pla_1  |
|                                             | XP_004150911.1 | Pla_2  |
|                                             | XP_009351296.1 | Pla_3  |
|                                             | AEK86563.1     | Pla_4  |
|                                             | XP_004290707.1 | Pla_5  |
|                                             | WP_006882632.1 | Arc_1  |
|                                             | KDE57447.1     | Arc_2  |
|                                             | WP_008095220.1 | Arc_3  |
|                                             | WP_004974838.1 | Arc_4  |
|                                             | WP_004969548.1 | Arc_5  |
|                                             | WP_016715768.1 | Eub_1  |
|                                             | YP_606197.1    | Eub_2  |
|                                             | WP_025754029.1 | Eub_3  |
|                                             | AIN61587.1     | Eub_4  |
|                                             | WP_028689034.1 | Eub_5  |
|                                             | WP_009685235.1 | Eub_6  |
|                                             | AHD12543.1     | Eub_7  |
|                                             | AIL59673.1     | Eub_8  |
|                                             | WP_024086160.1 | Eub_9  |
|                                             | WP_016484610.1 | Eub_10 |
| maker-scaffold1034_size31628-snap-gene-0.53 | XP_003390807.1 | Met_1  |
|                                             | XP_003390808.1 | Met_2  |
|                                             | CDW55151.1     | Met_3  |
|                                             | XP_003390336.1 | Met_4  |
|                                             | ETN83556.1     | Met_5  |
|                                             | NP_730301.3    | D_mel  |
|                                             | NP_493041.1    | C_ele  |
|                                             | EKC17257.1     | C_gig  |
|                                             | XP_006815639.1 | S_kow  |
|                                             | XP_422330.3    | G_gal  |
|                                             | XP_001618124.1 | N_vec  |
|                                             | KGQ11105.1     | Fun_1  |
|                                             | KGQ13405.1     | Fun_2  |
|                                             | KGQ13406.1     | Fun_3  |
|                                             | KGQ02342.1     | Fun_4  |
|                                             | KGQ13942.1     | Fun_5  |
|                                             | YP_009051152.1 | Pro_1  |
|                                             | NP_848950.1    | Pro_2  |
|                                             | YP_009020823.1 | Pro_3  |
|                                             | NP_045139.1    | Pro_4  |
|                                             | YP_005089900.1 | Pro_5  |

|                                            |                |        |
|--------------------------------------------|----------------|--------|
|                                            | EEC68421.1     | Pla_1  |
|                                            | XP_004151223.1 | Pla_2  |
|                                            | EEC68416.1     | Pla_3  |
|                                            | XP_004154075.1 | Pla_4  |
|                                            | XP_002538475.1 | Pla_5  |
|                                            | WP_021044468.1 | Arc_1  |
|                                            | WP_008441535.1 | Arc_2  |
|                                            | WP_017344028.1 | Arc_3  |
|                                            | WP_007345288.1 | Arc_4  |
|                                            | WP_008367388.1 | Arc_5  |
|                                            | YP_004987465.1 | Eub_1  |
|                                            | CDN66896.1     | Eub_2  |
|                                            | YP_003524199.1 | Eub_3  |
|                                            | WP_026074386.1 | Eub_4  |
|                                            | WP_027010394.1 | Eub_5  |
|                                            | WP_018273463.1 | Eub_6  |
|                                            | WP_018111969.1 | Eub_7  |
|                                            | WP_028333378.1 | Eub_8  |
|                                            | YP_001642290.1 | Eub_9  |
|                                            | WP_018273463.1 | Eub_10 |
| maker-scaffold115_size79125-snap-gene-0.80 | CDW60463.1     | Met_1  |
|                                            | CDW59420.1     | Met_2  |
|                                            | XP_003389916.1 | Met_3  |
|                                            | XP_003088060.1 | Met_4  |
|                                            | AAX33608.1     | D_mel  |
|                                            | NP_509205.2    | C_ele  |
|                                            | EKC17175.1     | C_gig  |
|                                            | XP_006814548.1 | S_kow  |
|                                            | XP_418636.4    | G_gal  |
|                                            | XP_001618124.1 | N_vec  |
|                                            | KGQ13962.1     | Fun_1  |
|                                            | KGQ11115.1     | Fun_2  |
|                                            | KGQ13055.1     | Fun_3  |
|                                            | KGQ06063.1     | Fun_4  |
|                                            | KGQ06104.1     | Fun_5  |
|                                            | WP_013875775.1 | Pro_1  |
|                                            | WP_008006286.1 | Pro_2  |
|                                            | WP_015790313.1 | Pro_3  |
|                                            | WP_008526693.1 | Pro_4  |
|                                            | WP_009377651.1 | Pro_5  |
|                                            | EEC78702.1     | Pla_1  |
|                                            | XP_004151395.1 | Pla_2  |
|                                            | XP_004153905.1 | Pla_3  |
|                                            | XP_002534826.1 | Pla_4  |
|                                            | EAY93131.1     | Pla_5  |

|                                                |                |        |
|------------------------------------------------|----------------|--------|
|                                                | WP_013875775.1 | Arc_1  |
|                                                | WP_008006286.1 | Arc_2  |
|                                                | WP_015790313.1 | Arc_3  |
|                                                | WP_008526693.1 | Arc_4  |
|                                                | WP_004977793.1 | Arc_5  |
|                                                | WP_013875711.1 | Arc_6  |
|                                                | WP_007694542.1 | Arc_7  |
|                                                | WP_013875807.1 | Arc_8  |
|                                                | WP_008526858.1 | Arc_9  |
|                                                | WP_006883492.1 | Arc_10 |
|                                                | AIS52208.1     | Eub_1  |
|                                                | WP_016742738.1 | Eub_2  |
|                                                | WP_026042936.1 | Eub_3  |
|                                                | YP_002769818.1 | Eub_4  |
|                                                | WP_031416280.1 | Eub_5  |
| maker-scaffold117_size78986-augustus-gene-0.84 | XP_003390883.1 | Met_1  |
|                                                | XP_003494811.1 | Met_2  |
|                                                | ELU02337.1     | Met_3  |
|                                                | XP_003389625.1 | Met_4  |
|                                                | ELU04438.1     | Met_5  |
|                                                | KGQ13756.1     | Fun_1  |
|                                                | KGQ11302.1     | Fun_2  |
|                                                | XP_006683192.1 | Fun_3  |
|                                                | KGQ13060.1     | Fun_4  |
|                                                | KDN34651.1     | Fun_5  |
|                                                | YP_001019170.1 | Pro_1  |
|                                                | NP_038441.1    | Pro_2  |
|                                                | YP_636569.1    | Pro_3  |
|                                                | YP_009105912.1 | Pro_4  |
|                                                | YP_009104931.1 | Pro_5  |
|                                                | YP_007026185.1 | Pla_1  |
|                                                | NP_039346.1    | Pla_2  |
|                                                | AAG41902.1     | Pla_3  |
|                                                | NP_777462.1    | Pla_4  |
|                                                | ABX00569.1     | Pla_5  |
|                                                | WP_011843494.1 | Arc_1  |
|                                                | WP_014404761.1 | Arc_2  |
|                                                | WP_014867666.1 | Arc_3  |
|                                                | WP_012035702.1 | Arc_4  |
|                                                | WP_004037770.1 | Arc_5  |
|                                                | YP_003321306.1 | Eub_1  |
|                                                | AHY48349.1     | Eub_2  |
|                                                | WP_029476644.1 | Eub_3  |
|                                                | WP_029483079.1 | Eub_4  |
|                                                | EYB69185.1     | Eub_5  |



|                                             |                |        |
|---------------------------------------------|----------------|--------|
|                                             | YP_003323049.1 | Eub_6  |
|                                             | WP_019008837.1 | Eub_7  |
|                                             | WP_019902200.1 | Eub_8  |
|                                             | YP_645380.1    | Eub_9  |
|                                             | ETX06459.1     | Eub_10 |
| maker-scaffold4690_size14997-snap-gene-0.16 | EZA47087.1     | Met_1  |
|                                             | XP_002161039.2 | Met_2  |
|                                             | EGI64323.1     | Met_3  |
|                                             | XP_009026759.1 | Met_4  |
|                                             | XP_003489091.1 | Met_5  |
|                                             | NP_476841.1    | D_mel  |
|                                             | NP_001021584.1 | C_ele  |
|                                             | EKC26070.1     | C_gig  |
|                                             | XP_002731016.1 | S_kow  |
|                                             | NP_001171688.1 | G_gal  |
|                                             | XP_001625612.1 | N_vec  |
|                                             | CDS10475.1     | Fun_1  |
|                                             | CEG65538.1     | Fun_2  |
|                                             | CDH54952.1     | Fun_3  |
|                                             | EPB93105.1     | Fun_4  |
|                                             | ESA16581.1     | Fun_5  |
|                                             | XP_728665.1    | Pro_1  |
|                                             | XP_001020979.1 | Pro_2  |
|                                             | EAS00734.2     | Pro_3  |
|                                             | XP_642518.1    | Pro_4  |
|                                             | AAC47024.1     | Pro_5  |
|                                             | XP_004516362.1 | Pla_1  |
|                                             | XP_010036324.1 | Pla_2  |
|                                             | XP_002975564.1 | Pla_3  |
|                                             | XP_002973537.1 | Pla_4  |
|                                             | EPS69017.1     | Pla_5  |
|                                             | WP_015052778.1 | Arc_1  |
|                                             | BAM69424.1     | Arc_2  |
|                                             | WP_023845946.1 | Arc_3  |
|                                             | WP_013295480.1 | Arc_4  |
|                                             | WP_012899880.1 | Arc_5  |
|                                             | WP_012036017.1 | Arc_6  |
|                                             | 3FZI_A         | Arc_7  |
|                                             | WP_015325096.1 | Arc_8  |
|                                             | KGK99262.1     | Arc_9  |
|                                             | WP_013824740.1 | Arc_10 |
|                                             | YP_005845493.1 | Eub_1  |
|                                             | GAK55472.1     | Eub_2  |
|                                             | KDR96246.1     | Eub_3  |
|                                             | WP_029716760.1 | Eub_4  |

|                                                       |                |        |
|-------------------------------------------------------|----------------|--------|
|                                                       | YP_007940929.1 | Eub_5  |
| maker-scaffold48_size118896-augustus-gene-0.115       | CDJ94783.1     | Met_1  |
|                                                       | EYC21918.1     | Met_2  |
|                                                       | ETN75960.1     | Met_3  |
|                                                       | XP_002643051.1 | Met_4  |
|                                                       | XP_003104942.1 | Met_5  |
|                                                       | NP_996292.2    | D_mel  |
|                                                       | NP_741240.1    | C_ele  |
|                                                       | EKC34559.1     | C_gig  |
|                                                       | XP_002736640.1 | S_kow  |
|                                                       | NP_001025756.1 | G_gal  |
|                                                       | XP_001636103.1 | N_vec  |
|                                                       | KFH73944.1     | Fun_1  |
|                                                       | ERZ94672.1     | Fun_2  |
|                                                       | KFH73994.1     | Fun_3  |
|                                                       | EXX59623.1     | Fun_4  |
|                                                       | EPB85777.1     | Fun_5  |
|                                                       | XP_005708640.1 | Pro_1  |
|                                                       | EJK73213.1     | Pro_2  |
|                                                       | XP_002296439.1 | Pro_3  |
|                                                       | XP_009837732.1 | Pro_4  |
|                                                       | XP_009837727.1 | Pro_5  |
|                                                       | XP_001753431.1 | Pla_1  |
|                                                       | XP_003637575.1 | Pla_2  |
|                                                       | XP_004498000.1 | Pla_3  |
|                                                       | XP_008341037.1 | Pla_4  |
|                                                       | CDP07619.1     | Pla_5  |
|                                                       | WP_014587630.1 | Arc_1  |
|                                                       | WP_013717995.1 | Arc_2  |
|                                                       | WP_008389279.1 | Arc_3  |
|                                                       | WP_014052983.1 | Arc_4  |
|                                                       | WP_010867008.1 | Arc_5  |
|                                                       | BAL59919.1     | Eub_1  |
|                                                       | ETW96694.1     | Eub_2  |
|                                                       | ETW95828.1     | Eub_3  |
|                                                       | YP_003373270.1 | Eub_4  |
|                                                       | EYF01151.1     | Eub_5  |
|                                                       | YP_008153959.1 | Eub_6  |
|                                                       | YP_001617056.1 | Eub_7  |
|                                                       | YP_003704627.1 | Eub_8  |
|                                                       | BAO18428.1     | Eub_9  |
|                                                       | WP_027070836.1 | Eub_10 |
| snap_masked-scaffold5085_size14234-processed-gene-0.8 | XP_003694894.1 | Met_1  |
|                                                       | XP_003494199.1 | Met_2  |
|                                                       | CDW59144.1     | Met_3  |

|                                             |                |        |
|---------------------------------------------|----------------|--------|
|                                             | EYB84565.1     | Met_4  |
|                                             | EYB84563.1     | Met_5  |
|                                             | AAL90373.1     | D_mel  |
|                                             | NP_001022623.1 | C_ele  |
|                                             | EKC18878.1     | C_gig  |
|                                             | XP_002741112.1 | S_kow  |
|                                             | NP_001025820.1 | G_gal  |
|                                             | XP_001619345.1 | N_vec  |
|                                             | ESX01276.1     | Fun_1  |
|                                             | EIF46696.1     | Fun_2  |
|                                             | KGQ11347.1     | Fun_3  |
|                                             | KGK39536.1     | Fun_4  |
|                                             | EPE08492.1     | Fun_5  |
|                                             | YP_002049425.1 | Pro_1  |
|                                             | CCF72996.1     | Pro_2  |
|                                             | XP_008914162.1 | Pro_3  |
|                                             | XP_002499891.1 | Pro_4  |
|                                             | XP_002997444.1 | Pro_5  |
|                                             | XP_002966250.1 | Pla_1  |
|                                             | XP_004297956.1 | Pla_2  |
|                                             | XP_010464585.1 | Pla_3  |
|                                             | XP_002310663.1 | Pla_4  |
|                                             | XP_002960579.1 | Pla_5  |
|                                             | YP_001330666.1 | Arc_1  |
|                                             | YP_004577128.1 | Arc_2  |
|                                             | YP_001324133.1 | Arc_3  |
|                                             | NP_987577.1    | Arc_4  |
|                                             | YP_004742098.1 | Arc_5  |
|                                             | YP_004051077.1 | Eub_1  |
|                                             | YP_005097518.1 | Eub_2  |
|                                             | YP_003497009.1 | Eub_3  |
|                                             | KHE92173.1     | Eub_4  |
|                                             | WP_008695554.1 | Eub_5  |
|                                             | YP_003967466.1 | Eub_6  |
|                                             | YP_003804037.1 | Eub_7  |
|                                             | WP_020613878.1 | Eub_8  |
|                                             | WP_023050069.1 | Eub_9  |
|                                             | YP_004602945.1 | Eub_10 |
| maker-scaffold6957_size11554-snap-gene-0.14 | XP_007330372.1 | Fun_1  |
|                                             | XP_006459325.1 | Fun_2  |
|                                             | KFA62214.1     | Fun_3  |
|                                             | XP_004333766.1 | Pro_1  |
|                                             | WP_011020160.1 | Arc_1  |
|                                             | AHL21712.1     | Arc_2  |
|                                             | WP_014787927.1 | Arc_3  |

|                                                       |                |        |
|-------------------------------------------------------|----------------|--------|
|                                                       | KDE54630.1     | Arc_4  |
|                                                       | WP_004037443.1 | Arc_5  |
|                                                       | AHL22815.1     | Arc_6  |
|                                                       | WP_013683942.1 | Arc_7  |
|                                                       | WP_018154833.1 | Arc_8  |
|                                                       | KDE56031.1     | Arc_9  |
|                                                       | WP_007043923.1 | Arc_10 |
|                                                       | WP_027713684.1 | Eub_1  |
|                                                       | YP_004863204.1 | Eub_2  |
|                                                       | YP_007094641.1 | Eub_3  |
|                                                       | YP_001276859.1 | Eub_4  |
|                                                       | YP_004660744.1 | Eub_5  |
| maker-scaffold7284_size11211-snap-gene-0.10           | NP_248482.1    | Arc_1  |
|                                                       | YP_003458392.1 | Arc_2  |
|                                                       | YP_003668298.1 | Arc_3  |
|                                                       | WP_023845917.1 | Arc_4  |
|                                                       | YP_002307070.1 | Arc_5  |
|                                                       | WP_008547787.1 | Eub_1  |
|                                                       | YP_005097508.1 | Eub_2  |
|                                                       | WP_019952117.1 | Eub_3  |
|                                                       | YP_005083038.1 | Eub_4  |
|                                                       | WP_029480120.1 | Eub_5  |
|                                                       | WP_019995162.1 | Eub_6  |
|                                                       | WP_019586149.1 | Eub_7  |
|                                                       | YP_005097712.1 | Eub_8  |
|                                                       | YP_002940899.1 | Eub_9  |
|                                                       | ETP70520.1     | Eub_10 |
| snap_masked-scaffold8624_size10011-processed-gene-0.6 | XP_005805776.1 | Met_1  |
|                                                       | XP_008394756.1 | Met_2  |
|                                                       | XP_004081219.1 | Met_3  |
|                                                       | XP_002600037.1 | Met_4  |
|                                                       | XP_002166751.1 | Met_5  |
|                                                       | NP_610308.2    | D_mel  |
|                                                       | NP_506570.1    | C_ele  |
|                                                       | EKC30553.1     | C_gig  |
|                                                       | XP_006817025.1 | S_kow  |
|                                                       | XP_421193.1    | G_gal  |
|                                                       | XP_001639113.1 | N_vec  |
|                                                       | EPB85547.1     | Fun_1  |
|                                                       | EIE85905.1     | Fun_2  |
|                                                       | ERZ95212.1     | Fun_3  |
|                                                       | KFH72802.1     | Fun_4  |
|                                                       | CCX04229.1     | Fun_5  |
|                                                       | XP_008905649.1 | Pro_1  |
|                                                       | XP_008905636.1 | Pro_2  |

|                                  |                |        |
|----------------------------------|----------------|--------|
|                                  | XP_008607143.1 | Pro_3  |
|                                  | KDO35686.1     | Pro_4  |
|                                  | XP_009520519.1 | Pro_5  |
|                                  | CDP12036.1     | Pla_1  |
|                                  | XP_009340056.1 | Pla_2  |
|                                  | NP_001242868.1 | Pla_3  |
|                                  | XP_009350917.1 | Pla_4  |
|                                  | AFK43129.1     | Pla_5  |
|                                  | WP_009377807.1 | Arc_1  |
|                                  | WP_008384804.1 | Arc_2  |
|                                  | WP_004969557.1 | Arc_3  |
|                                  | YP_004036030.1 | Arc_4  |
|                                  | WP_004062390.1 | Arc_5  |
|                                  | WP_008575891.1 | Arc_6  |
|                                  | YP_003536606.1 | Arc_7  |
|                                  | WP_007275314.1 | Arc_8  |
|                                  | WP_008095241.1 | Arc_9  |
|                                  | WP_008427553.1 | Arc_10 |
|                                  | YP_003392872.1 | Eub_1  |
|                                  | YP_003299425.1 | Eub_2  |
|                                  | CEG30478.1     | Eub_3  |
|                                  | KFN08388.1     | Eub_4  |
|                                  | YP_001959196.1 | Eub_5  |
| maker-scaffold7913-snap-gene-0.8 | XP_004144976.1 | Pla_1  |
|                                  | KEH16990.1     | Pla_2  |
|                                  | XP_010239583.1 | Pla_3  |
|                                  | XP_009388207.1 | Pla_4  |
|                                  | KGN47269.1     | Pla_5  |
|                                  | XP_008645343.1 | Pla_6  |
|                                  | KEH17348.1     | Pla_7  |
|                                  | KDO39227.1     | Pla_8  |
|                                  | XP_003614397.1 | Pla_9  |
|                                  | XP_008664051.1 | Pla_10 |
|                                  | WP_004837891.1 | Eub_1  |
|                                  | WP_021994825.1 | Eub_2  |
|                                  | EZU73576.1     | Eub_3  |
|                                  | CDW61305.1     | Met_1  |
|                                  | KFD59988.1     | Met_2  |
|                                  | CDI98843.1     | Met_3  |
|                                  | CDS25675.1     | Met_4  |
|                                  | CDS25763.1     | Met_5  |
|                                  | CDQ01417.1     | Met_6  |
|                                  | XP_003370857.1 | Met_7  |
|                                  | CCI50950.1     | Pro_1  |
|                                  | XP_009539700.1 | Pro_2  |

|                                                      |                |        |
|------------------------------------------------------|----------------|--------|
|                                                      | XP_008881610.1 | Pro_3  |
|                                                      | XP_005855606.1 | Pro_4  |
|                                                      | CBJ33763.1     | Pro_5  |
|                                                      | EJK58439.1     | Pro_6  |
|                                                      | EJY66653.1     | Pro_7  |
|                                                      | EJY65597.1     | Pro_8  |
|                                                      | CDW75723.1     | Pro_9  |
|                                                      | XP_009037769.1 | Pro_10 |
| snap_masked-scaffold9447_size9412-processed-gene-0.6 | XP_004431947.1 | Met_1  |
|                                                      | XP_006872217.1 | Met_2  |
|                                                      | XP_004717516.1 | Met_3  |
|                                                      | XP_004271695.1 | Met_4  |
|                                                      | XP_006211575.1 | Met_5  |
|                                                      | NP_733183.1    | D_mel  |
|                                                      | NP_741083.1    | C_ele  |
|                                                      | EKC37583.1     | C_gig  |
|                                                      | XP_002730825.1 | S_kow  |
|                                                      | NP_990000.1    | G_gal  |
|                                                      | XP_001639716.1 | N_vec  |
|                                                      | XP_001271754.1 | Fun_1  |
|                                                      | EYE99742.1     | Fun_2  |
|                                                      | NP_594582.1    | Fun_3  |
|                                                      | XP_002562117.1 | Fun_4  |
|                                                      | KFY73827.1     | Fun_5  |
|                                                      | XP_002776755.1 | Pro_1  |
|                                                      | CCW63390.1     | Pro_2  |
|                                                      | XP_008862815.1 | Pro_3  |
|                                                      | EJY79302.1     | Pro_4  |
|                                                      | CCI41049.1     | Pro_5  |
|                                                      | XP_002982106.1 | Pla_1  |
|                                                      | AIL24123.1     | Pla_2  |
|                                                      | EYU29514.1     | Pla_3  |
|                                                      | XP_004293797.1 | Pla_4  |
|                                                      | XP_006354427.1 | Pla_5  |
|                                                      | WP_020863737.1 | Arc_1  |
|                                                      | WP_007109524.1 | Arc_2  |
|                                                      | WP_014863331.1 | Arc_3  |
|                                                      | CDK39042.1     | Arc_4  |
|                                                      | WP_006433147.1 | Arc_5  |
|                                                      | WP_018132764.1 | Eub_1  |
|                                                      | EWG10330.1     | Eub_2  |
|                                                      | WP_028397584.1 | Eub_3  |
|                                                      | WP_026567516.1 | Eub_4  |
|                                                      | WP_019122321.1 | Eub_5  |
|                                                      | WP_026041785.1 | Eub_6  |

|                                                           |                |        |
|-----------------------------------------------------------|----------------|--------|
|                                                           | AHV96308.1     | Eub_7  |
|                                                           | WP_033844031.1 | Eub_8  |
|                                                           | WP_031410118.1 | Eub_9  |
|                                                           | WP_033022690.1 | Eub_10 |
| maker-scaffold100_size92086-snap-gene-0.59                | XP_001965764.1 | Met_1  |
|                                                           | XP_004208221.1 | Met_2  |
|                                                           | XP_004210584.1 | Met_3  |
|                                                           | CDQ74194.1     | Met_4  |
|                                                           | XP_008182148.1 | Met_5  |
|                                                           | EXX54610.1     | Fun_1  |
|                                                           | EXX71234.1     | Fun_2  |
|                                                           | EXX77471.1     | Fun_3  |
|                                                           | EXX60617.1     | Fun_4  |
|                                                           | ERZ95335.1     | Fun_5  |
|                                                           | EXX55650.1     | Fun_6  |
|                                                           | EXX71964.1     | Fun_7  |
|                                                           | XP_007768175.1 | Fun_8  |
|                                                           | EXX75000.1     | Fun_9  |
|                                                           | EXX67829.1     | Fun_10 |
|                                                           | ETK82390.1     | Pro_1  |
|                                                           | ETM45973.1     | Pro_2  |
|                                                           | XP_002905980.1 | Pro_3  |
|                                                           | XP_009534719.1 | Pro_4  |
|                                                           | ETL88842.1     | Pro_5  |
|                                                           | XP_008647179.1 | Pla_1  |
|                                                           | XP_003611303.1 | Pla_2  |
|                                                           | XP_008441705.1 | Pla_3  |
|                                                           | XP_008675648.1 | Pla_4  |
|                                                           | XP_006828689.1 | Pla_5  |
| augustus_masked-scaffold1002_size32014-processed-gene-0.4 | CDW58869.1     | Met_1  |
|                                                           | XP_002412211.1 | Met_2  |
|                                                           | ELT98791.1     | Met_3  |
|                                                           | KFB45413.1     | Met_4  |
|                                                           | XP_001600500.3 | Met_5  |
|                                                           | NP_001097800.1 | D_mel  |
|                                                           | NP_495761.2    | C_ele  |
|                                                           | EKC37511.1     | C_gig  |
|                                                           | XP_006819255.1 | S_kow  |
|                                                           | NP_001004370.1 | G_gal  |
|                                                           | XP_001632486.1 | N_vec  |
|                                                           | XP_006675041.1 | Fun_1  |
|                                                           | CAI54276.1     | Fun_2  |
|                                                           | CDS03250.1     | Fun_3  |
|                                                           | KFH72372.1     | Fun_4  |
|                                                           | AGO45862.1     | Fun_5  |

|                                                           |                |        |
|-----------------------------------------------------------|----------------|--------|
|                                                           | XP_006969358.1 | Fun_6  |
|                                                           | KEY81006.1     | Fun_7  |
|                                                           | XP_752458.1    | Fun_8  |
|                                                           | XP_006695675.1 | Fun_9  |
|                                                           | KFH65919.1     | Fun_10 |
|                                                           | XP_005835793.1 | Pro_1  |
|                                                           | CCI10344.1     | Pro_2  |
|                                                           | ETM00112.1     | Pro_3  |
|                                                           | XP_008604566.1 | Pro_4  |
|                                                           | XP_008615359.1 | Pro_5  |
|                                                           | NP_001130547.1 | Pla_1  |
|                                                           | CDY68393.1     | Pla_2  |
|                                                           | XP_004500249.1 | Pla_3  |
|                                                           | XP_007016118.1 | Pla_4  |
|                                                           | KEH34256.1     | Pla_5  |
|                                                           | AIF19380.1     | Arc_1  |
|                                                           | WP_013719253.1 | Arc_2  |
|                                                           | WP_012899337.1 | Arc_3  |
|                                                           | WP_013329202.1 | Arc_4  |
|                                                           | KCZ72341.1     | Arc_5  |
|                                                           | AHF06106.1     | Eub_6  |
|                                                           | WP_021803882.1 | Eub_7  |
|                                                           | YP_004968539.1 | Eub_8  |
|                                                           | YP_003639472.1 | Eub_9  |
|                                                           | YP_004518633.1 | Eub_10 |
| augustus_masked-scaffold10141_size8958-processed-gene-0.1 | XP_001635316.1 | Met_1  |
|                                                           | XP_009435878.1 | Met_2  |
|                                                           | XP_001625497.1 | N_vec  |
|                                                           | GAA87885.1     | Fun_1  |
|                                                           | KFH63080.1     | Fun_2  |
|                                                           | CEJ86814.1     | Fun_3  |
|                                                           | XP_008084311.1 | Fun_4  |
|                                                           | XP_001886371.1 | Fun_5  |
|                                                           | XP_002561833.1 | Fun_6  |
|                                                           | CEJ90243.1     | Fun_7  |
|                                                           | KFG79844.1     | Fun_8  |
|                                                           | XP_001875527.1 | Fun_9  |
|                                                           | CDO68660.1     | Fun_10 |
|                                                           | XP_008619938.1 | Pro_1  |
|                                                           | XP_008612269.1 | Pro_2  |
|                                                           | KDO34045.1     | Pro_3  |
|                                                           | EFA75896.1     | Pro_4  |
|                                                           | XP_008864995.1 | Pro_5  |
|                                                           | XP_001783997.1 | Pla_1  |
|                                                           | WP_021219852.1 | Eub_1  |



|                                                 |                |        |
|-------------------------------------------------|----------------|--------|
|                                                 | WP_031532596.1 | Eub_2  |
|                                                 | KFF04636.1     | Eub_3  |
|                                                 | YP_006434332.1 | Eub_4  |
|                                                 | YP_007059441.1 | Eub_5  |
| maker-scaffold104_size84685-augustus-gene-0.25  | XP_001662061.1 | Met_1  |
|                                                 | XP_001334403.2 | Met_2  |
|                                                 | XP_007238911.1 | Met_3  |
|                                                 | XP_002426005.1 | Met_4  |
|                                                 | ERG83250.1     | Met_5  |
|                                                 | EKC23290.1     | C_gig  |
|                                                 | XP_002738912.1 | S_kow  |
|                                                 | CAG32330.1     | G_gal  |
|                                                 | XP_001627527.1 | N_vec  |
|                                                 | EXX67466.1     | Fun_1  |
|                                                 | ERZ98239.1     | Fun_2  |
|                                                 | EXX64054.1     | Fun_3  |
|                                                 | EXX64053.1     | Fun_4  |
|                                                 | ESA22219.1     | Fun_5  |
|                                                 | EXX55225.1     | Fun_6  |
|                                                 | ESA22357.1     | Fun_7  |
|                                                 | EXX78894.1     | Fun_8  |
|                                                 | EPE05478.1     | Fun_9  |
|                                                 | EXX78161.1     | Fun_10 |
|                                                 | XP_642017.1    | Pro_1  |
|                                                 | XP_003290267.1 | Pro_2  |
|                                                 | XP_003286087.1 | Pro_3  |
|                                                 | XP_004361490.1 | Pro_4  |
|                                                 | XP_004366680.1 | Pro_5  |
|                                                 | XP_001768654.1 | Pla_1  |
|                                                 | XP_001778634.1 | Pla_2  |
|                                                 | XP_008338155.1 | Pla_3  |
|                                                 | CDY51560.1     | Pla_4  |
|                                                 | XP_006430002.1 | Pla_5  |
|                                                 | WP_011278022.1 | Arc_1  |
|                                                 | 4IHQ_A         | Arc_2  |
|                                                 | WP_013718158.1 | Arc_3  |
|                                                 | WP_011225183.1 | Arc_4  |
|                                                 | WP_009989409.1 | Arc_5  |
|                                                 | EEH95729.1     | Eub_1  |
|                                                 | WP_007372230.1 | Eub_2  |
|                                                 | WP_022091661.1 | Eub_3  |
|                                                 | WP_021977185.1 | Eub_4  |
|                                                 | WP_025486789.1 | Eub_5  |
| maker-scaffold1055_size34456-augustus-gene-0.19 | NP_504814.1    | Met_1  |
|                                                 | XP_002596094.1 | Met_2  |

|                                                       |                |        |
|-------------------------------------------------------|----------------|--------|
|                                                       | AFV15454.1     | Met_3  |
|                                                       | NP_001091293.1 | Met_4  |
|                                                       | XP_002632079.1 | Met_5  |
|                                                       | AAB17283.1     | D_mel  |
|                                                       | NP_001255596.1 | C_ele  |
|                                                       | EKC23483.1     | C_gig  |
|                                                       | XP_002739828.1 | S_kow  |
|                                                       | NP_990221.1    | G_gal  |
|                                                       | KDR72546.1     | Fun_1  |
|                                                       | XP_001884841.1 | Fun_2  |
|                                                       | XP_007333711.1 | Fun_3  |
|                                                       | XP_007263537.1 | Fun_4  |
|                                                       | XP_002910275.1 | Fun_5  |
|                                                       | XP_007313627.1 | Fun_6  |
|                                                       | XP_006463956.1 | Fun_7  |
|                                                       | EMD34865.1     | Fun_8  |
|                                                       | BAJ04704.1     | Fun_9  |
|                                                       | KDQ10248.1     | Fun_10 |
|                                                       | XP_004357764.1 | Pro_1  |
|                                                       | XP_003284991.1 | Pro_2  |
|                                                       | EFA78019.1     | Pro_3  |
|                                                       | XP_644535.1    | Pro_4  |
|                                                       | XP_004344552.1 | Pro_5  |
|                                                       | BAJ91418.1     | Pla_1  |
|                                                       | XP_008227235.1 | Pla_2  |
|                                                       | XP_004288836.1 | Pla_3  |
|                                                       | XP_006406907.1 | Pla_4  |
|                                                       | XP_007212738.1 | Pla_5  |
|                                                       | AIF11336.1     | Arc_1  |
|                                                       | AIF01706.1     | Arc_2  |
|                                                       | EHR76326.1     | Arc_3  |
|                                                       | CEE11519.1     | Eub_1  |
|                                                       | KER10060.1     | Eub_2  |
|                                                       | WP_014244994.1 | Eub_3  |
|                                                       | KHD88229.1     | Eub_4  |
|                                                       | WP_002773346.1 | Eub_5  |
| maker-scaffold10741_size8634-snap-gene-0.6            | no hits        |        |
| snap_masked-scaffold10791_size8602-processed-gene-0.2 | no hits        |        |
| maker-scaffold1092_size30908-snap-gene-0.25           | no hits        |        |
| maker-scaffold1114_size30693-snap-gene-0.20           | XP_002412211.1 | Met_1  |
|                                                       | CDW58869.1     | Met_2  |
|                                                       | XP_008557991.1 | Met_3  |
|                                                       | XP_002070486.1 | Met_4  |
|                                                       | KFB45413.1     | Met_5  |
|                                                       | NP_001097800.1 | D_mel  |

|                                                 |                |        |
|-------------------------------------------------|----------------|--------|
|                                                 | NP_508784.1    | C_ele  |
|                                                 | EKC37511.1     | C_gig  |
|                                                 | XP_002736983.1 | S_kow  |
|                                                 | NP_989795.1    | G_gal  |
|                                                 | XP_001632486.1 | N_vec  |
|                                                 | XP_006675041.1 | Fun_1  |
|                                                 | KFH72372.1     | Fun_2  |
|                                                 | CBY77922.1     | Fun_3  |
|                                                 | CEG84518.1     | Fun_4  |
|                                                 | AGM18795.1     | Fun_5  |
|                                                 | KGQ02839.1     | Fun_6  |
|                                                 | KHJ35111.1     | Fun_7  |
|                                                 | XP_008602503.1 | Fun_8  |
|                                                 | EPB81245.1     | Fun_9  |
|                                                 | CAI54276.1     | Fun_10 |
|                                                 | XP_005826511.1 | Pro_1  |
|                                                 | XP_008604566.1 | Pro_2  |
|                                                 | CCI10344.1     | Pro_3  |
|                                                 | XP_008900549.1 | Pro_4  |
|                                                 | XP_005828005.1 | Pro_5  |
|                                                 | NP_001130547.1 | Pla_1  |
|                                                 | CAN68179.1     | Pla_2  |
|                                                 | XP_010030862.1 | Pla_3  |
|                                                 | XP_002314106.1 | Pla_4  |
|                                                 | XP_006848199.1 | Pla_5  |
|                                                 | WP_013329202.1 | Arc_1  |
|                                                 | WP_023992546.1 | Arc_2  |
|                                                 | WP_015052990.1 | Arc_3  |
|                                                 | KCZ72341.1     | Arc_4  |
|                                                 | WP_012964887.1 | Arc_5  |
|                                                 | WP_015311955.1 | Eub_1  |
|                                                 | WP_011697598.1 | Eub_2  |
|                                                 | WP_013809672.1 | Eub_3  |
|                                                 | WP_013378647.1 | Eub_4  |
|                                                 | WP_018702598.1 | Eub_5  |
| maker-scaffold1218_size29458-augustus-gene-0.15 | XP_003087518.1 | Met_1  |
|                                                 | XP_003494242.1 | Met_2  |
|                                                 | XP_003087253.1 | Met_3  |
|                                                 | XP_006572634.1 | Met_4  |
|                                                 | AET07638.1     | D_mel  |
|                                                 | NP_493642.1    | C_ele  |
|                                                 | EKC35130.1     | C_gig  |
|                                                 | XP_002835661.1 | Fun_1  |
|                                                 | XP_002146366.1 | Fun_2  |
|                                                 | KEQ95620.1     | Fun_3  |

|                                                        |                |        |
|--------------------------------------------------------|----------------|--------|
|                                                        | CCX04382.1     | Fun_4  |
|                                                        | XP_007681732.1 | Fun_5  |
|                                                        | XP_002582987.1 | Fun_6  |
|                                                        | XP_001594706.1 | Fun_7  |
|                                                        | XP_007782065.1 | Fun_8  |
|                                                        | XP_001213488.1 | Fun_9  |
|                                                        | XP_003851279.1 | Fun_10 |
|                                                        | XP_001581214.1 | Pro_1  |
|                                                        | XP_001318849.1 | Pro_2  |
|                                                        | XP_001307179.1 | Pro_3  |
|                                                        | XP_001313378.1 | Pro_4  |
|                                                        | ESL05032.1     | Pro_5  |
|                                                        | XP_001786771.1 | Pla_1  |
|                                                        | XP_009350059.1 | Pla_2  |
|                                                        | XP_004153096.1 | Pla_3  |
|                                                        | XP_004150450.1 | Pla_4  |
|                                                        | AAT46463.1     | Pla_5  |
|                                                        | WP_011447997.1 | Arc_1  |
|                                                        | WP_006107949.1 | Arc_2  |
|                                                        | WP_026178011.1 | Arc_3  |
|                                                        | WP_013644835.1 | Arc_4  |
|                                                        | WP_021058250.1 | Arc_5  |
|                                                        | WP_010864105.1 | Eub_1  |
|                                                        | EUJ18999.1     | Eub_2  |
|                                                        | WP_003770993.1 | Eub_3  |
|                                                        | WP_026676254.1 | Eub_4  |
|                                                        | WP_021259541.1 | Eub_5  |
| snap_masked-scaffold1229_size29343-processed-gene-0.12 | ELT89484.1     | Met_1  |
|                                                        | XP_008189204.1 | Met_2  |
|                                                        | XP_004210003.1 | Met_3  |
|                                                        | XP_003252027.1 | Met_4  |
|                                                        | XP_008010030.1 | Met_5  |
|                                                        | EFX05599.1     | Fun_1  |
|                                                        | XP_007386223.1 | Fun_2  |
|                                                        | KFX93406.1     | Fun_3  |
|                                                        | KGO46259.1     | Fun_4  |
|                                                        | XP_001273792.1 | Fun_5  |
|                                                        | EME42006.1     | Fun_6  |
|                                                        | EKG22580.1     | Fun_7  |
|                                                        | GAD96370.1     | Fun_8  |
|                                                        | XP_007584845.1 | Fun_9  |
|                                                        | XP_002481616.1 | Fun_10 |
|                                                        | XP_004351783.1 | Pro_1  |
|                                                        | EFA76876.1     | Pro_2  |
|                                                        | XP_004357599.1 | Pro_3  |

|                                                           |                |        |
|-----------------------------------------------------------|----------------|--------|
|                                                           | EFA81931.1     | Pro_4  |
|                                                           | CDI84718.1     | Pro_5  |
|                                                           | XP_002536383.1 | Pla_1  |
|                                                           | XP_006433080.1 | Pla_2  |
|                                                           | XP_009145312.1 | Pla_3  |
|                                                           | XP_004150799.1 | Pla_4  |
|                                                           | XP_004135660.1 | Pla_5  |
|                                                           | WP_015302305.1 | Arc_1  |
|                                                           | WP_007693300.1 | Arc_2  |
|                                                           | WP_011034822.1 | Arc_3  |
|                                                           | WP_009365802.1 | Arc_4  |
|                                                           | WP_012034641.1 | Arc_5  |
|                                                           | WP_012925026.1 | Eub_1  |
|                                                           | WP_026449801.1 | Eub_2  |
|                                                           | WP_009195208.1 | Eub_3  |
|                                                           | WP_012324524.1 | Eub_4  |
|                                                           | WP_020407949.1 | Eub_5  |
| augustus_masked-scaffold1669_size25481-processed-gene-0.3 | EFX73537.1     | Met_1  |
|                                                           | EFX90311.1     | Met_2  |
|                                                           | KFH65094.1     | Fun_1  |
|                                                           | EQL38503.1     | Fun_2  |
|                                                           | EGC45789.1     | Fun_3  |
|                                                           | XP_003709515.1 | Fun_4  |
|                                                           | XP_006962669.1 | Fun_5  |
|                                                           | XP_005648551.1 | Pro_1  |
|                                                           | EFA78705.1     | Pro_2  |
|                                                           | XP_640495.2    | Pro_3  |
|                                                           | XP_005829071.1 | Pro_4  |
|                                                           | KDO28577.1     | Pro_5  |
|                                                           | XP_008244013.1 | Pla_1  |
|                                                           | XP_006279531.1 | Pla_2  |
|                                                           | KFK31719.1     | Pla_3  |
|                                                           | XP_008374728.1 | Pla_4  |
|                                                           | XP_002515916.1 | Pla_5  |
|                                                           | CBI23616.3     | Pla_6  |
|                                                           | XP_010481865.1 | Pla_7  |
|                                                           | XP_008385722.1 | Pla_8  |
|                                                           | XP_009348085.1 | Pla_9  |
|                                                           | KFK25558.1     | Pla_10 |
|                                                           | WP_018035917.1 | Arc_1  |
|                                                           | WP_019163754.1 | Eub_1  |
|                                                           | WP_014295917.1 | Eub_2  |
|                                                           | WP_003890357.1 | Eub_3  |
|                                                           | WP_026518421.1 | Eub_4  |
|                                                           | WP_022304042.1 | Eub_5  |

|                                                       |                |        |
|-------------------------------------------------------|----------------|--------|
| snap_masked-scaffold2358_size21708-processed-gene-0.4 | EFX90311.1     | Met_1  |
|                                                       | EFX73537.1     | Met_2  |
|                                                       | KFH65094.1     | Fun_1  |
|                                                       | EER44529.1     | Fun_2  |
|                                                       | EPS98363.1     | Fun_3  |
|                                                       | XP_010759782.1 | Fun_4  |
|                                                       | XP_007797619.1 | Fun_5  |
|                                                       | XP_640495.2    | Pro_1  |
|                                                       | XP_005648551.1 | Pro_2  |
|                                                       | EFA78705.1     | Pro_3  |
|                                                       | XP_003283190.1 | Pro_4  |
|                                                       | XP_004358933.1 | Pro_5  |
|                                                       | XP_002671820.1 | Pla_1  |
|                                                       | XP_006299070.1 | Pla_2  |
|                                                       | XP_010468470.1 | Pla_3  |
|                                                       | XP_004301068.1 | Pla_4  |
|                                                       | KFK25559.1     | Pla_5  |
|                                                       | BAB02888.1     | Pla_6  |
|                                                       | XP_010490121.1 | Pla_7  |
|                                                       | XP_009596006.1 | Pla_8  |
|                                                       | XP_006299602.1 | Pla_9  |
|                                                       | XP_004299227.1 | Pla_10 |
|                                                       | WP_018035917.1 | Arc_1  |
|                                                       | WP_019163754.1 | Eub_1  |
|                                                       | WP_015554366.1 | Eub_2  |
|                                                       | KFZ25997.1     | Eub_3  |
|                                                       | WP_022213626.1 | Eub_4  |
|                                                       | WP_003890357.1 | Eub_5  |
| maker-scaffold301_size53378-augustus-gene-0.31        | EFX90311.1     | Met_1  |
|                                                       | EFX73537.1     | Met_2  |
|                                                       | XP_798930.2    | Met_3  |
|                                                       | KFH65094.1     | Fun_1  |
|                                                       | EEH10820.1     | Fun_2  |
|                                                       | XP_010759782.1 | Fun_3  |
|                                                       | EPS98363.1     | Fun_4  |
|                                                       | EEQ88435.1     | Fun_5  |
|                                                       | XP_640495.2    | Pro_1  |
|                                                       | XP_005648551.1 | Pro_2  |
|                                                       | EFA78705.1     | Pro_3  |
|                                                       | XP_002671820.1 | Pro_4  |
|                                                       | XP_008612699.1 | Pro_5  |
|                                                       | XP_002883559.1 | Pla_1  |
|                                                       | XP_006299070.1 | Pla_2  |
|                                                       | XP_004301068.1 | Pla_3  |
|                                                       | KFK25559.1     | Pla_4  |

|                                                 |                |        |
|-------------------------------------------------|----------------|--------|
|                                                 | NP_189122.1    | Pla_5  |
|                                                 | XP_010490121.1 | Pla_6  |
|                                                 | NP_196825.1    | Pla_7  |
|                                                 | XP_009596006.1 | Pla_8  |
|                                                 | XP_004299227.1 | Pla_9  |
|                                                 | XP_008244015.1 | Pla_10 |
|                                                 | WP_018035917.1 | Arc_1  |
|                                                 | WP_015554366.1 | Eub_2  |
|                                                 | KFZ25997.1     | Eub_3  |
|                                                 | WP_003890357.1 | Eub_4  |
|                                                 | WP_022213626.1 | Eub_5  |
| maker-scaffold3259_size18493-snap-gene-0.15     | EFX73537.1     | Met_1  |
|                                                 | EFX90311.1     | Met_2  |
|                                                 | EFX73673.1     | Met_3  |
|                                                 | KFH65094.1     | Fun_1  |
|                                                 | EMT60789.1     | Fun_2  |
|                                                 | EEH10820.1     | Fun_3  |
|                                                 | EHK50424.1     | Fun_4  |
|                                                 | XP_002583201.1 | Fun_5  |
|                                                 | XP_004358933.1 | Pro_1  |
|                                                 | XP_640495.2    | Pro_2  |
|                                                 | KDO33253.1     | Pro_3  |
|                                                 | XP_008612536.1 | Pro_4  |
|                                                 | EFA78705.1     | Pro_5  |
|                                                 | XP_008812490.1 | Pla_1  |
|                                                 | XP_006365776.1 | Pla_2  |
|                                                 | XP_006402029.1 | Pla_3  |
|                                                 | KCW60647.1     | Pla_4  |
|                                                 | XP_007211020.1 | Pla_5  |
|                                                 | XP_002980512.1 | Pla_6  |
|                                                 | CBI38184.3     | Pla_7  |
|                                                 | CDY22349.1     | Pla_8  |
|                                                 | NP_001058232.1 | Pla_9  |
|                                                 | XP_010481865.1 | Pla_10 |
|                                                 | WP_018035917.1 | Arc_1  |
|                                                 | WP_019163754.1 | Eub_1  |
|                                                 | WP_022229781.1 | Eub_2  |
|                                                 | WP_027870105.1 | Eub_3  |
|                                                 | WP_014295917.1 | Eub_4  |
|                                                 | WP_013485158.1 | Eub_5  |
| maker-scaffold5591_size22739-augustus-gene-0.10 | EFX73537.1     | Met_1  |
|                                                 | EFX90311.1     | Met_2  |
|                                                 | XP_003775165.1 | Met_3  |
|                                                 | KFH65094.1     | Fun_1  |
|                                                 | EEH10820.1     | Fun_2  |

|                                                          |                |        |
|----------------------------------------------------------|----------------|--------|
|                                                          | XP_010759782.1 | Fun_3  |
|                                                          | XP_002789744.1 | Fun_4  |
|                                                          | EFW17364.1     | Fun_5  |
|                                                          | XP_005648551.1 | Pro_1  |
|                                                          | XP_004358933.1 | Pro_2  |
|                                                          | EFA78705.1     | Pro_3  |
|                                                          | XP_002671820.1 | Pro_4  |
|                                                          | KDO28577.1     | Pro_5  |
|                                                          | CDY60899.1     | Pla_1  |
|                                                          | XP_010494325.1 | Pla_2  |
|                                                          | XP_006279531.1 | Pla_3  |
|                                                          | XP_002863659.1 | Pla_4  |
|                                                          | XP_006403245.1 | Pla_5  |
|                                                          | XP_009596006.1 | Pla_6  |
|                                                          | XP_004299227.1 | Pla_7  |
|                                                          | XP_006419628.1 | Pla_8  |
|                                                          | XP_010522481.1 | Pla_9  |
|                                                          | XP_010243133.1 | Pla_10 |
|                                                          | WP_018035917.1 | Arc_1  |
|                                                          | WP_019163754.1 | Eub_1  |
|                                                          | WP_015554366.1 | Eub_2  |
|                                                          | WP_014295917.1 | Eub_3  |
|                                                          | WP_031542772.1 | Eub_4  |
|                                                          | WP_022213626.1 | Eub_5  |
| maker-scaffold7537_size10937-snap-gene-0.9               | no hits        |        |
| augustus_masked-scaffold847_size34339-processed-gene-0.4 | EFX73537.1     | Met_1  |
|                                                          | EFX90311.1     | Met_2  |
|                                                          | KFH65094.1     | Fun_1  |
|                                                          | EQL38503.1     | Fun_2  |
|                                                          | XP_003709515.1 | Fun_3  |
|                                                          | XP_006962669.1 | Fun_4  |
|                                                          | XP_002583201.1 | Fun_5  |
|                                                          | XP_005648551.1 | Pro_1  |
|                                                          | EFA78705.1     | Pro_2  |
|                                                          | XP_640495.2    | Pro_3  |
|                                                          | XP_005829071.1 | Pro_4  |
|                                                          | KDO28577.1     | Pro_5  |
|                                                          | XP_008244013.1 | Pla_1  |
|                                                          | XP_006279531.1 | Pla_2  |
|                                                          | KFK31719.1     | Pla_3  |
|                                                          | XP_008374728.1 | Pla_4  |
|                                                          | XP_002515916.1 | Pla_5  |
|                                                          | CBI23616.3     | Pla_6  |
|                                                          | XP_010481865.1 | Pla_7  |
|                                                          | XP_008385722.1 | Pla_8  |



|                                            |                |        |
|--------------------------------------------|----------------|--------|
|                                            | XP_009348085.1 | Pla_9  |
|                                            | XP_010522481.1 | Pla_10 |
|                                            | WP_018035917.1 | Arc_1  |
|                                            | WP_019163754.1 | Eub_1  |
|                                            | WP_014295917.1 | Eub_2  |
|                                            | WP_003890357.1 | Eub_3  |
|                                            | WP_026518421.1 | Eub_4  |
|                                            | WP_022304042.1 | Eub_5  |
| maker-scaffold10_size447749-snap-gene-2.50 | XP_003494297.1 | Met_1  |
|                                            | XP_002401716.1 | Met_2  |
|                                            | 4KCA_A         | Met_3  |
|                                            | CDW58502.1     | Met_4  |
|                                            | XP_003747944.1 | Met_5  |
|                                            | NP_572212.1    | D_mel  |
|                                            | NP_001256208.1 | C_ele  |
|                                            | EKC21560.1     | C_gig  |
|                                            | XP_006822377.1 | S_kow  |
|                                            | XP_001620462.1 | G_gal  |
|                                            | NP_990784.1    | N_vec  |
|                                            | ESZ95345.1     | Fun_1  |
|                                            | BAO41368.1     | Fun_2  |
|                                            | XP_001523405.1 | Fun_3  |
|                                            | CCU97737.1     | Fun_4  |
|                                            | XP_719372.1    | Fun_5  |
|                                            | XP_001698467.1 | Pro_1  |
|                                            | YP_008965792.1 | Pro_2  |
|                                            | CBJ27065.1     | Pro_3  |
|                                            | XP_005706177.1 | Pro_4  |
|                                            | XP_005838337.1 | Pro_5  |
|                                            | XP_002456987.1 | Pla_1  |
|                                            | XP_010537268.1 | Pla_2  |
|                                            | AGT16574.1     | Pla_3  |
|                                            | XP_010063856.1 | Pla_4  |
|                                            | XP_004496464.1 | Pla_5  |
|                                            | WP_011696309.1 | Arc_1  |
|                                            | WP_004266945.1 | Arc_2  |
|                                            | WP_012617691.1 | Arc_3  |
|                                            | WP_005558848.1 | Arc_4  |
|                                            | WP_008012525.1 | Arc_5  |
|                                            | WP_013688259.1 | Eub_1  |
|                                            | WP_013666464.1 | Eub_2  |
|                                            | WP_029331895.1 | Eub_3  |
|                                            | WP_010518977.1 | Eub_4  |
|                                            | WP_028890024.1 | Eub_5  |
|                                            | WP_027065741.1 | Eub_6  |

|                                                           |                |        |
|-----------------------------------------------------------|----------------|--------|
|                                                           | WP_008244206.1 | Eub_7  |
|                                                           | WP_027412590.1 | Eub_8  |
|                                                           | WP_012794719.1 | Eub_9  |
|                                                           | WP_025763979.1 | Eub_10 |
| maker-scaffold10072_size9001-snap-gene-0.11               | EFX60142.1     | Met_1  |
|                                                           | XP_008189189.1 | Met_2  |
|                                                           | XP_002806096.1 | Met_3  |
|                                                           | XP_008189318.1 | Met_4  |
|                                                           | XP_003731889.1 | Met_5  |
|                                                           | KGQ13328.1     | Fun_1  |
|                                                           | KGQ13007.1     | Fun_2  |
|                                                           | KGQ02324.1     | Fun_3  |
|                                                           | XP_003343047.1 | Fun_4  |
|                                                           | ELR02842.1     | Fun_5  |
|                                                           | XP_002536388.1 | Pla_1  |
|                                                           | XP_004150795.1 | Pla_2  |
|                                                           | XP_002534793.1 | Pla_3  |
|                                                           | XP_004151615.1 | Pla_4  |
|                                                           | XP_002536543.1 | Pla_5  |
|                                                           | AIF12159.1     | Arc_2  |
|                                                           | KGM41405.1     | Eub_1  |
|                                                           | KFB77454.1     | Eub_2  |
|                                                           | WP_018077583.1 | Eub_3  |
|                                                           | WP_011764342.1 | Eub_4  |
|                                                           | WP_011112626.1 | Eub_5  |
|                                                           | WP_015833036.1 | Eub_6  |
|                                                           | WP_004307530.1 | Eub_7  |
|                                                           | WP_013149194.1 | Eub_8  |
|                                                           | WP_015829816.1 | Eub_9  |
|                                                           | WP_027457926.1 | Eub_10 |
| augustus_masked-scaffold634_size55776-processed-gene-0.11 | XP_003738667.1 | Met_1  |
|                                                           | ETN82745.1     | Met_2  |
|                                                           | ELU02595.1     | Met_3  |
|                                                           | XP_008188580.1 | Met_4  |
|                                                           | XP_003390062.1 | Met_5  |
|                                                           | XP_751388.1    | Fun_1  |
|                                                           | XP_001266605.1 | Fun_2  |
|                                                           | GAD97714.1     | Fun_3  |
|                                                           | XP_001800184.1 | Fun_4  |
|                                                           | XP_007830094.1 | Fun_5  |
|                                                           | AGN55416.1     | Pro_1  |
|                                                           | CBJ29121.1     | Pro_2  |
|                                                           | XP_009311423.1 | Pro_3  |
|                                                           | EWM26995.1     | Pro_4  |
|                                                           | XP_005776122.1 | Pro_5  |

|                                             |                |        |
|---------------------------------------------|----------------|--------|
|                                             | XP_004151165.1 | Pla_1  |
|                                             | XP_004150801.1 | Pla_2  |
|                                             | XP_004153282.1 | Pla_3  |
|                                             | XP_002538957.1 | Pla_4  |
|                                             | XP_002536519.1 | Pla_5  |
|                                             | AAS80142.1     | Arc_1  |
|                                             | WP_022540841.1 | Arc_2  |
|                                             | WP_026177860.1 | Arc_3  |
|                                             | AIJ06331.1     | Arc_4  |
|                                             | WP_015017668.1 | Arc_5  |
|                                             | GAK50919.1     | Eub_1  |
|                                             | EZP35449.1     | Eub_2  |
|                                             | WP_012829633.1 | Eub_3  |
|                                             | WP_017876566.1 | Eub_4  |
|                                             | KGG72191.1     | Eub_5  |
|                                             | KEZ76615.1     | Eub_6  |
|                                             | WP_006634116.1 | Eub_7  |
|                                             | WP_026265016.1 | Eub_8  |
|                                             | KFC11132.1     | Eub_9  |
|                                             | WP_013839871.1 | Eub_10 |
| maker-scaffold1864_size33177-snap-gene-0.15 | XP_002936263.2 | Met_1  |
|                                             | XP_005058356.1 | Met_2  |
|                                             | XP_010721642.1 | Met_3  |
|                                             | XP_006264954.1 | Met_4  |
|                                             | XP_005529981.1 | Met_5  |
|                                             | XP_003642627.2 | G_gal  |
|                                             | KGQ11337.1     | Fun_1  |
|                                             | XP_007847524.1 | Fun_2  |
|                                             | XP_008035226.1 | Fun_3  |
|                                             | XP_002487065.1 | Fun_4  |
|                                             | EKV12168.1     | Fun_5  |
|                                             | XP_001582566.1 | Pro_1  |
|                                             | XP_003288844.1 | Pro_2  |
|                                             | EFA83248.1     | Pro_3  |
|                                             | ETO69210.1     | Pro_4  |
|                                             | CCA27737.1     | Pro_5  |
|                                             | XP_009622673.1 | Pla_1  |
|                                             | XP_003559419.1 | Pla_2  |
|                                             | XP_009138723.1 | Pla_3  |
|                                             | XP_006293189.1 | Pla_4  |
|                                             | CDP09158.1     | Pla_5  |
|                                             | WP_008525790.1 | Arc_1  |
|                                             | WP_004052441.1 | Arc_2  |
|                                             | WP_008388568.1 | Arc_3  |
|                                             | WP_014514219.1 | Arc_4  |

|                                            |                |        |
|--------------------------------------------|----------------|--------|
|                                            | WP_023395855.1 | Arc_5  |
|                                            | ADC36136.1     | Eub_1  |
|                                            | WP_033378084.1 | Eub_2  |
|                                            | KER10627.1     | Eub_3  |
|                                            | WP_006309209.1 | Eub_4  |
|                                            | WP_027311271.1 | Eub_5  |
|                                            | AGA60127.1     | Eub_6  |
|                                            | WP_018280194.1 | Eub_7  |
|                                            | WP_033073909.1 | Eub_8  |
|                                            | WP_013634099.1 | Eub_9  |
|                                            | WP_025863140.1 | Eub_10 |
| maker-scaffold2739_size20194-snap-gene-0.9 | XP_005099835.1 | Met_1  |
|                                            | EGT36150.1     | Met_2  |
|                                            | ETN85160.1     | Met_3  |
|                                            | ELT98931.1     | Met_4  |
|                                            | EYC08769.1     | Met_5  |
|                                            | NP_001024899.1 | C_ele  |
|                                            | EKC19968.1     | C_gig  |
|                                            | XP_002734727.1 | S_kow  |
|                                            | XP_001231457.2 | G_gal  |
|                                            | XP_007831537.1 | Fun_1  |
|                                            | KFH48506.1     | Fun_2  |
|                                            | XP_658924.1    | Fun_3  |
|                                            | KFA62644.1     | Fun_4  |
|                                            | KGQ13279.1     | Fun_5  |
|                                            | XP_005768404.1 | Pro_1  |
|                                            | EWM25928.1     | Pro_2  |
|                                            | XP_001432411.1 | Pro_3  |
|                                            | EWM29697.1     | Pro_4  |
|                                            | XP_625638.1    | Pro_5  |
|                                            | XP_002536305.1 | Pla_1  |
|                                            | CDP00545.1     | Pla_2  |
|                                            | XP_001759460.1 | Pla_3  |
|                                            | XP_010477896.1 | Pla_4  |
|                                            | XP_010551319.1 | Pla_5  |
|                                            | WP_012186262.1 | Arc_1  |
|                                            | WP_015789392.1 | Arc_2  |
|                                            | WP_013881653.1 | Arc_3  |
|                                            | WP_006665629.1 | Arc_4  |
|                                            | WP_023392761.1 | Arc_5  |
|                                            | WP_014267536.1 | Eub_1  |
|                                            | CDG83135.1     | Eub_2  |
|                                            | WP_014266599.1 | Eub_3  |
|                                            | WP_002652980.1 | Eub_4  |
|                                            | BAL53258.1     | Eub_5  |

|                                                 |                |        |
|-------------------------------------------------|----------------|--------|
|                                                 | WP_011682943.1 | Eub_6  |
|                                                 | WP_010586830.1 | Eub_7  |
|                                                 | WP_028056784.1 | Eub_8  |
|                                                 | WP_032750987.1 | Eub_9  |
|                                                 | WP_020719291.1 | Eub_10 |
| maker-scaffold5875_size12964-augustus-gene-0.12 | XP_008119646.1 | Met_1  |
|                                                 | XP_005439707.1 | Met_2  |
|                                                 | XP_009566128.1 | Met_3  |
|                                                 | XP_010574610.1 | Met_4  |
|                                                 | XP_010721642.1 | Met_5  |
|                                                 | EKC22647.1     | C_gig  |
|                                                 | XP_006823392.1 | S_kow  |
|                                                 | XP_003642627.2 | G_gal  |
|                                                 | KGQ11337.1     | Fun_1  |
|                                                 | KEQ89829.1     | Fun_2  |
|                                                 | XP_007926532.1 | Fun_3  |
|                                                 | XP_002565392.1 | Fun_4  |
|                                                 | XP_007267977.1 | Fun_5  |
|                                                 | XP_001582566.1 | Pro_1  |
|                                                 | XP_629427.1    | Pro_2  |
|                                                 | EFA83248.1     | Pro_3  |
|                                                 | XP_004338410.1 | Pro_4  |
|                                                 | CBN79266.1     | Pro_5  |
|                                                 | XP_002538818.1 | Pla_1  |
|                                                 | XP_004151490.1 | Pla_2  |
|                                                 | XP_010253611.1 | Pla_3  |
|                                                 | CBI19138.3     | Pla_4  |
|                                                 | EYU23226.1     | Pla_5  |
|                                                 | WP_020936057.1 | Arc_1  |
|                                                 | WP_004052441.1 | Arc_2  |
|                                                 | WP_015788806.1 | Arc_3  |
|                                                 | WP_014514219.1 | Arc_4  |
|                                                 | WP_013303407.1 | Arc_5  |
|                                                 | ADC36136.1     | Eub_1  |
|                                                 | WP_012936867.1 | Eub_2  |
|                                                 | WP_014855432.1 | Eub_3  |
|                                                 | WP_007224926.1 | Eub_4  |
|                                                 | WP_029286826.1 | Eub_5  |
|                                                 | KER10627.1     | Eub_6  |
|                                                 | WP_013445511.1 | Eub_7  |
|                                                 | WP_015394375.1 | Eub_8  |
|                                                 | WP_025145736.1 | Eub_9  |
|                                                 | WP_020214487.1 | Eub_10 |
| maker-scaffold653_size38539-augustus-gene-0.27  | XP_009017213.1 | Met_1  |
|                                                 | XP_001604463.1 | Met_2  |

|                                                           |                |        |
|-----------------------------------------------------------|----------------|--------|
|                                                           | 4INE_A         | Met_3  |
|                                                           | EGI59206.1     | Met_4  |
|                                                           | XP_003690071.1 | Met_5  |
|                                                           | NP_728647.2    | D_mel  |
|                                                           | NP_504248.1    | C_ele  |
|                                                           | EKC35520.1     | C_gig  |
|                                                           | XP_002739709.1 | S_kow  |
|                                                           | XP_001232694.1 | G_gal  |
|                                                           | XP_001634000.1 | N_vec  |
|                                                           | XP_001593795.1 | Fun_1  |
|                                                           | EXL98237.1     | Fun_2  |
|                                                           | ESZ92947.1     | Fun_3  |
|                                                           | KFY71418.1     | Fun_4  |
|                                                           | XP_007831558.1 | Fun_5  |
|                                                           | XP_001580573.1 | Pro_1  |
|                                                           | XP_005713374.1 | Pro_2  |
|                                                           | XP_005773499.1 | Pro_3  |
|                                                           | CBN78409.1     | Pro_4  |
|                                                           | EWM24131.1     | Pro_5  |
|                                                           | XP_002968407.1 | Pla_1  |
|                                                           | XP_003579980.1 | Pla_2  |
|                                                           | XP_009348175.1 | Pla_3  |
|                                                           | EMT16365.1     | Pla_4  |
|                                                           | XP_008669256.1 | Pla_5  |
|                                                           | WP_012186229.1 | Arc_1  |
|                                                           | WP_007983554.1 | Arc_2  |
|                                                           | WP_013775078.1 | Arc_3  |
|                                                           | WP_012617787.1 | Arc_4  |
|                                                           | WP_006107239.1 | Arc_5  |
|                                                           | WP_010298206.1 | Eub_1  |
|                                                           | EKE10074.1     | Eub_2  |
|                                                           | WP_010298216.1 | Eub_3  |
|                                                           | CEG55859.1     | Eub_4  |
|                                                           | WP_019215882.1 | Eub_5  |
|                                                           | WP_016641614.1 | Eub_6  |
|                                                           | ABK51300.1     | Eub_7  |
|                                                           | WP_030668919.1 | Eub_8  |
|                                                           | CEG59739.1     | Eub_9  |
|                                                           | ABK51304.1     | Eub_10 |
| augustus_masked-scaffold16703_size5213-processed-gene-0.3 | XP_002006305.1 | Met_1  |
|                                                           | AID66689.1     | Met_2  |
|                                                           | KFB50133.1     | Met_3  |
|                                                           | EGI61493.1     | Met_4  |
|                                                           | XP_001648219.1 | Met_5  |
|                                                           | NP_610910.1    | D_mel  |

|                                                       |                |        |
|-------------------------------------------------------|----------------|--------|
|                                                       | NP_499156.1    | C_ele  |
|                                                       | EKC25144.1     | C_gig  |
|                                                       | XP_002733386.1 | S_kow  |
|                                                       | NP_001264324.1 | G_gal  |
|                                                       | XP_001632083.1 | N_vec  |
|                                                       | EPZ33336.1     | Fun_1  |
|                                                       | CDH51333.1     | Fun_2  |
|                                                       | KFH69078.1     | Fun_3  |
|                                                       | CEG78357.1     | Fun_4  |
|                                                       | XP_006677806.1 | Fun_5  |
|                                                       | XP_002896725.1 | Pro_1  |
|                                                       | XP_002185363.1 | Pro_2  |
|                                                       | XP_008619731.1 | Pro_3  |
|                                                       | XP_009827265.1 | Pro_4  |
|                                                       | XP_004361016.1 | Pro_5  |
|                                                       | XP_002978957.1 | Pla_1  |
|                                                       | XP_001776046.1 | Pla_2  |
|                                                       | ACN34888.1     | Pla_3  |
|                                                       | EMT23733.1     | Pla_4  |
|                                                       | XP_010693603.1 | Pla_5  |
|                                                       | WP_009989350.1 | Arc_1  |
|                                                       | WP_018031782.1 | Arc_2  |
|                                                       | BAK54799.1     | Arc_3  |
|                                                       | WP_012020349.1 | Arc_4  |
|                                                       | EZQ01785.1     | Arc_5  |
|                                                       | ADI23429.1     | Eub_1  |
|                                                       | WP_023785595.1 | Eub_2  |
|                                                       | WP_031310303.1 | Eub_3  |
|                                                       | WP_012334335.1 | Eub_4  |
|                                                       | WP_012115283.1 | Eub_5  |
|                                                       | WP_027314507.1 | Eub_6  |
|                                                       | WP_019403833.1 | Eub_7  |
|                                                       | KEO57881.1     | Eub_8  |
|                                                       | ADI22862.1     | Eub_9  |
|                                                       | CDI01830.1     | Eub_10 |
| snap_masked-scaffold15732_size5688-processed-gene-0.5 | XP_005844806.1 | Pro_1  |
|                                                       | XP_001701647.1 | Pro_2  |
|                                                       | XP_003062187.1 | Pro_3  |
|                                                       | XP_002507857.1 | Pro_4  |
|                                                       | XP_005646648.1 | Pro_5  |
|                                                       | XP_010255398.1 | Pla_1  |
|                                                       | XP_007040225.1 | Pla_2  |
|                                                       | AFF18844.2     | Pla_3  |
|                                                       | XP_010053262.1 | Pla_4  |
|                                                       | XP_002965328.1 | Pla_5  |

|                                                |                |        |
|------------------------------------------------|----------------|--------|
|                                                | WP_026069031.1 | Arc_1  |
|                                                | WP_012067963.1 | Arc_2  |
|                                                | WP_013719810.1 | Arc_3  |
|                                                | WP_012107187.1 | Arc_4  |
|                                                | WP_023788514.1 | Eub_1  |
|                                                | WP_029349626.1 | Eub_2  |
|                                                | GAK45010.1     | Eub_3  |
|                                                | WP_018389422.1 | Eub_4  |
|                                                | WP_025898136.1 | Eub_5  |
|                                                | WP_008968192.1 | Eub_6  |
|                                                | WP_019401656.1 | Eub_7  |
|                                                | WP_012171491.1 | Eub_8  |
|                                                | WP_024082207.1 | Eub_9  |
|                                                | WP_020184280.1 | Eub_10 |
| maker-scaffold35_size141275-augustus-gene-0.60 | XP_003087253.1 | Met_1  |
|                                                | XP_006572634.1 | Met_2  |
|                                                | XP_003494242.1 | Met_3  |
|                                                | CDJ94564.1     | Met_5  |
|                                                | AAR88535.1     | D_mel  |
|                                                | NP_493662.1    | C_ele  |
|                                                | EKC28549.1     | C_gig  |
|                                                | XP_006823203.1 | S_kow  |
|                                                | XP_424658.4    | G_gal  |
|                                                | XP_001632614.1 | N_vec  |
|                                                | CCU97940.1     | Fun_1  |
|                                                | XP_002835661.1 | Fun_2  |
|                                                | XP_002478659.1 | Fun_3  |
|                                                | KEQ95620.1     | Fun_4  |
|                                                | XP_007928828.1 | Fun_5  |
|                                                | XP_007782065.1 | Fun_6  |
|                                                | KEQ77816.1     | Fun_7  |
|                                                | XP_001240362.1 | Fun_8  |
|                                                | XP_007916978.1 | Fun_9  |
|                                                | XP_003851279.1 | Fun_10 |
|                                                | XP_001313378.1 | Pro_1  |
|                                                | EKF37720.1     | Pro_2  |
|                                                | XP_009527058.1 | Pro_3  |
|                                                | XP_004338893.1 | Pro_4  |
|                                                | XP_001786771.1 | Pla_1  |
|                                                | XP_009350059.1 | Pla_2  |
|                                                | XP_004153096.1 | Pla_3  |
|                                                | AAT46463.1     | Pla_4  |
|                                                | KEH25560.1     | Pla_5  |
|                                                | WP_011447997.1 | Arc_1  |
|                                                | WP_006107949.1 | Arc_2  |



|                                                |                |        |
|------------------------------------------------|----------------|--------|
|                                                | WP_026178011.1 | Arc_3  |
|                                                | WP_008417650.1 | Arc_4  |
|                                                | WP_021050036.1 | Arc_5  |
|                                                | WP_011701593.1 | Eub_1  |
|                                                | WP_009883770.1 | Eub_2  |
|                                                | WP_029519205.1 | Eub_3  |
|                                                | WP_014096474.1 | Eub_4  |
|                                                | WP_018978261.1 | Eub_5  |
| maker-scaffold6361_size12239-augustus-gene-0.6 | KDR15437.1     | Met_1  |
|                                                | XP_003699567.1 | Met_2  |
|                                                | EFX81873.1     | Met_3  |
|                                                | BAN67992.1     | Met_4  |
|                                                | AHA15412.1     | Met_5  |
|                                                | AAAY33507.1    | D_mel  |
|                                                | NP_001255321.1 | C_ele  |
|                                                | EKC34158.1     | C_gig  |
|                                                | XP_006812248.1 | S_kow  |
|                                                | XP_417192.4    | G_gal  |
|                                                | XP_001621855.1 | N_vec  |
|                                                | XP_007413493.1 | Fun_1  |
|                                                | XP_007754244.1 | Fun_2  |
|                                                | XP_007677021.1 | Fun_3  |
|                                                | EPS45179.1     | Fun_4  |
|                                                | EWC44178.1     | Fun_5  |
|                                                | XP_007304919.1 | Fun_6  |
|                                                | EGX44973.1     | Fun_7  |
|                                                | KEF57337.1     | Fun_8  |
|                                                | BAA24288.1     | Fun_9  |
|                                                | XP_009551060.1 | Fun_10 |
|                                                | XP_008873559.1 | Pro_1  |
|                                                | XP_008621529.1 | Pro_2  |
|                                                | XP_005717470.1 | Pro_3  |
|                                                | ETP45559.1     | Pro_4  |
|                                                | XP_008873560.1 | Pro_5  |
|                                                | EAZ37398.1     | Pla_1  |
|                                                | CBI24374.3     | Pla_2  |
|                                                | EMS54718.1     | Pla_3  |
|                                                | XP_008657378.1 | Pla_4  |
|                                                | XP_010261207.1 | Pla_5  |
|                                                | WP_009378229.1 | Arc_1  |
|                                                | WP_006091359.1 | Arc_2  |
|                                                | WP_007997629.1 | Arc_3  |
|                                                | WP_013199551.1 | Arc_4  |
|                                                | WP_008385348.1 | Arc_5  |
|                                                | WP_020553760.1 | Eub_1  |

|                                                        |                |        |
|--------------------------------------------------------|----------------|--------|
|                                                        | WP_020545881.1 | Eub_2  |
|                                                        | WP_014376096.1 | Eub_3  |
|                                                        | WP_010490673.1 | Eub_4  |
|                                                        | EZP77682.1     | Eub_5  |
| snap_masked-scaffold11172_size8401-processed-gene-0.10 | XP_005296939.1 | Met_1  |
|                                                        | XP_003759590.1 | Met_2  |
|                                                        | EHJ65205.1     | Met_3  |
|                                                        | ERG78783.1     | Met_4  |
|                                                        | XP_007055214.1 | Met_5  |
|                                                        | XP_010022303.1 | D_mel  |
|                                                        | NP_499752.2    | C_ele  |
|                                                        | EKC36665.1     | C_gig  |
|                                                        | XP_002733329.1 | S_kow  |
|                                                        | NP_001006571.1 | G_gal  |
|                                                        | XP_001629906.1 | N_vec  |
|                                                        | KGQ06105.1     | Fun_1  |
|                                                        | XP_006680366.1 | Fun_2  |
|                                                        | CEG80401.1     | Fun_3  |
|                                                        | EPB91067.1     | Fun_4  |
|                                                        | KFH68662.1     | Fun_5  |
|                                                        | CCI48665.1     | Pro_1  |
|                                                        | XP_008896359.1 | Pro_2  |
|                                                        | XP_008875209.1 | Pro_3  |
|                                                        | XP_643924.1    | Pro_4  |
|                                                        | AFA43560.1     | Pro_5  |
|                                                        | XP_004151081.1 | Pla_1  |
|                                                        | XP_008380600.1 | Pla_2  |
|                                                        | CDX79511.1     | Pla_3  |
|                                                        | XP_007225742.1 | Pla_4  |
|                                                        | XP_009376354.1 | Pla_5  |
|                                                        | WP_018194565.1 | Arc_1  |
|                                                        | AIF16890.1     | Arc_2  |
|                                                        | AIY89150.1     | Arc_3  |
|                                                        | WP_006651380.1 | Arc_4  |
|                                                        | WP_010878693.1 | Arc_5  |
|                                                        | WP_018991769.1 | Eub_1  |
|                                                        | WP_019140074.1 | Eub_2  |
|                                                        | WP_008055001.1 | Eub_3  |
|                                                        | WP_003651130.1 | Eub_4  |
|                                                        | KHL68010.1     | Eub_5  |
|                                                        | WP_011236874.1 | Eub_6  |
|                                                        | WP_012696471.1 | Eub_7  |
|                                                        | KER68500.1     | Eub_8  |
|                                                        | WP_027823665.1 | Eub_9  |
|                                                        | WP_020676134.1 | Eub_10 |

|                                                       |                |        |
|-------------------------------------------------------|----------------|--------|
| maker-scaffold1372_size27931-augustus-gene-0.18       | XP_002652421.1 | Fun_1  |
|                                                       | XP_007693131.1 | Fun_2  |
|                                                       | EXK77392.1     | Fun_3  |
|                                                       | CCF36248.1     | Fun_4  |
|                                                       | EHK21831.1     | Fun_5  |
|                                                       | AIF84065.1     | Arc_1  |
|                                                       | WP_008415190.1 | Arc_2  |
|                                                       | WP_013328432.1 | Arc_3  |
|                                                       | AHG49912.1     | Eub_1  |
|                                                       | WP_013442119.1 | Eub_2  |
|                                                       | WP_012929377.1 | Eub_3  |
|                                                       | WP_026848803.1 | Eub_4  |
|                                                       | WP_028071295.1 | Eub_5  |
|                                                       | WP_016478841.1 | Eub_6  |
|                                                       | EWS60166.1     | Eub_7  |
|                                                       | WP_026211259.1 | Eub_8  |
|                                                       | WP_026224969.1 | Eub_9  |
|                                                       | WP_011659296.1 | Eub_10 |
| snap_masked-scaffold15974_size5576-processed-gene-0.4 | GAA58079.1     | Met_1  |
|                                                       | CDQ06444.1     | Met_2  |
|                                                       | KII64380.1     | Met_3  |
|                                                       | KII60428.1     | Met_4  |
|                                                       | ESA04763.1     | Fun_1  |
|                                                       | XP_002778525.1 | Pro_1  |
|                                                       | XP_005714299.1 | Pro_2  |
|                                                       | XP_002261981.1 | Pro_3  |
|                                                       | YP_003734590.1 | Pro_4  |
|                                                       | ABV70075.1     | Pro_5  |
|                                                       | EEC77198.1     | Pla_1  |
|                                                       | XP_002539765.1 | Pla_2  |
|                                                       | CBI38526.3     | Pla_3  |
|                                                       | XP_002538226.1 | Pla_4  |
|                                                       | WP_018204489.1 | Arc_1  |
|                                                       | KHO49811.1     | Arc_2  |
|                                                       | KCZ72093.1     | Arc_3  |
|                                                       | KHO49864.1     | Arc_4  |
|                                                       | WP_008085101.1 | Arc_5  |
|                                                       | WP_011478777.1 | Eub_1  |
|                                                       | WP_025224447.1 | Eub_2  |
|                                                       | WP_036301985.1 | Eub_3  |
|                                                       | WP_024296699.1 | Eub_4  |
|                                                       | WP_019899701.1 | Eub_5  |
|                                                       | WP_029148793.1 | Eub_6  |
|                                                       | WP_013818233.1 | Eub_7  |
|                                                       | KFB74853.1     | Eub_8  |

|                                                       |                |        |
|-------------------------------------------------------|----------------|--------|
|                                                       | WP_005372856.1 | Eub_9  |
|                                                       | AAK73287.1     | Eub_10 |
| snap_masked-scaffold21250_size3389-processed-gene-0.4 | ETN71917.1     | Met_1  |
|                                                       | ELT98248.1     | Met_2  |
|                                                       | XP_009280520.1 | Met_3  |
|                                                       | CDW59419.1     | Met_4  |
|                                                       | EFX60659.1     | Met_5  |
|                                                       | XP_001621431.1 | N_vec  |
|                                                       | KGQ13765.1     | Fun_1  |
|                                                       | CCO32341.1     | Fun_2  |
|                                                       | XP_003034240.1 | Fun_3  |
|                                                       | CDS09559.1     | Fun_4  |
|                                                       | EJT48035.1     | Fun_5  |
|                                                       | EMH77043.1     | Pro_1  |
|                                                       | NP_050679.1    | Pro_2  |
|                                                       | YP_009019547.1 | Pro_3  |
|                                                       | YP_002049106.1 | Pro_4  |
|                                                       | YP_007627321.1 | Pro_5  |
|                                                       | XP_001786429.1 | Pla_1  |
|                                                       | XP_002536709.1 | Pla_2  |
|                                                       | XP_010423240.1 | Pla_3  |
|                                                       | Q9LYP5.3       | Pla_4  |
|                                                       | WP_007912399.1 | Eub_1  |
|                                                       | WP_012191727.1 | Eub_2  |
|                                                       | AIE84789.1     | Eub_3  |
|                                                       | WP_012548320.1 | Eub_4  |
|                                                       | WP_016483317.1 | Eub_5  |
|                                                       | WP_012257866.1 | Eub_6  |
|                                                       | WP_004094729.1 | Eub_7  |
|                                                       | WP_007932110.1 | Eub_8  |
|                                                       | WP_007290102.1 | Eub_9  |
|                                                       | WP_038669286.1 | Eub_10 |
| maker-scaffold5005_size27369-snap-gene-0.11           | XP_001625497.1 | N_vec  |
|                                                       | EYE90242.1     | Fun_1  |
|                                                       | KFH63080.1     | Fun_2  |
|                                                       | KDQ07441.1     | Fun_3  |
|                                                       | EGX52233.1     | Fun_4  |
|                                                       | KDR69753.1     | Fun_5  |
|                                                       | KDQ08968.1     | Fun_6  |
|                                                       | EHA25061.1     | Fun_7  |
|                                                       | KFH74029.1     | Fun_8  |
|                                                       | XP_002584863.1 | Fun_9  |
|                                                       | KDR84407.1     | Fun_10 |
|                                                       | XP_008619938.1 | Pro_1  |
|                                                       | KDO34045.1     | Pro_2  |

|                                                        |                |        |
|--------------------------------------------------------|----------------|--------|
|                                                        | KDO25464.1     | Pro_3  |
|                                                        | XP_008877743.1 | Pro_4  |
|                                                        | EFA75896.1     | Pro_5  |
|                                                        | XP_001783997.1 | Pla_1  |
|                                                        | WP_034340452.1 | Eub_1  |
|                                                        | WP_012240424.1 | Eub_2  |
|                                                        | WP_031532596.1 | Eub_3  |
|                                                        | WP_012234898.1 | Eub_4  |
|                                                        | WP_015159832.1 | Eub_5  |
| snap_masked-scaffold10028_size9034-processed-gene-0.12 | EFX61835.1     | Met_1  |
|                                                        | XP_002399538.1 | Met_2  |
|                                                        | ETN82707.1     | Met_3  |
|                                                        | XP_003087310.1 | Met_4  |
|                                                        | XP_003248492.1 | Met_5  |
|                                                        | XP_001617728.1 | N_vec  |
|                                                        | KGQ11045.1     | Fun_1  |
|                                                        | XP_003343367.1 | Fun_2  |
|                                                        | XP_006683255.1 | Fun_3  |
|                                                        | KGQ13747.1     | Fun_4  |
|                                                        | KGQ13011.1     | Fun_5  |
|                                                        | YP_007878145.1 | Pro_1  |
|                                                        | YP_008144745.1 | Pro_2  |
|                                                        | YP_063524.1    | Pro_3  |
|                                                        | YP_007627306.1 | Pro_4  |
|                                                        | YP_009029538.1 | Pro_5  |
|                                                        | XP_002536382.1 | Pla_1  |
|                                                        | XP_004151145.1 | Pla_2  |
|                                                        | XP_002535661.1 | Pla_3  |
|                                                        | XP_004151325.1 | Pla_4  |
|                                                        | XP_002534694.1 | Pla_5  |
|                                                        | WP_013100526.1 | Arc_1  |
|                                                        | WP_011973413.1 | Arc_2  |
|                                                        | WP_015733022.1 | Arc_3  |
|                                                        | WP_011019850.1 | Arc_4  |
|                                                        | WP_011869438.1 | Arc_5  |
|                                                        | WP_034158682.1 | Eub_1  |
|                                                        | WP_017977919.1 | Eub_2  |
|                                                        | WP_029868197.1 | Eub_3  |
|                                                        | WP_010544673.1 | Eub_4  |
|                                                        | WP_033921186.1 | Eub_5  |
|                                                        | WP_010125067.1 | Eub_6  |
|                                                        | WP_011241478.1 | Eub_7  |
|                                                        | KHS46558.1     | Eub_8  |
|                                                        | WP_021224583.1 | Eub_9  |
|                                                        | WP_011444994.1 | Eub_10 |

|                                              |                |        |
|----------------------------------------------|----------------|--------|
| maker-scaffold15817_size10713-snap-gene-0.13 | XP_003384219.1 | Met_1  |
|                                              | XP_008188578.1 | Met_2  |
|                                              | AEN94429.1     | Met_3  |
|                                              | ACZ34284.1     | Met_4  |
|                                              | KHN82288.1     | Met_5  |
|                                              | KGQ13967.1     | Fun_1  |
|                                              | XP_003350552.1 | Fun_2  |
|                                              | XP_001877863.1 | Fun_3  |
|                                              | KFH71571.1     | Fun_4  |
|                                              | XP_003662939.1 | Fun_5  |
|                                              | KFM23834.1     | Pro_1  |
|                                              | XP_005644798.1 | Pro_2  |
|                                              | XP_002780169.1 | Pro_3  |
|                                              | CBK25268.2     | Pro_4  |
|                                              | ADI46896.1     | Pro_5  |
|                                              | XP_002972200.1 | Pla_1  |
|                                              | XP_002518167.1 | Pla_2  |
|                                              | XP_001757872.1 | Pla_3  |
|                                              | XP_009758422.1 | Pla_4  |
|                                              | XP_004239873.1 | Pla_5  |
|                                              | AIF69214.1     | Arc_1  |
|                                              | WP_004066086.1 | Arc_2  |
|                                              | WP_018153845.1 | Arc_3  |
|                                              | WP_011868217.1 | Arc_4  |
|                                              | WP_010885242.1 | Arc_5  |
|                                              | CEG56315.1     | Eub_1  |
|                                              | CEG59884.1     | Eub_2  |
|                                              | WP_010654134.1 | Eub_3  |
|                                              | WP_014714452.1 | Eub_4  |
|                                              | WP_018575757.1 | Eub_5  |
|                                              | WP_011006174.1 | Eub_6  |
|                                              | WP_014944796.1 | Eub_7  |
|                                              | AHE67034.1     | Eub_8  |
|                                              | WP_011096893.1 | Eub_9  |
|                                              | WP_014943697.1 | Eub_10 |
| maker-scaffold4964_size23147-snap-gene-0.19  | XP_001863560.1 | Met_1  |
|                                              | XP_009859733.1 | Met_2  |
|                                              | ETN64199.1     | Met_3  |
|                                              | XP_005101843.1 | Met_4  |
|                                              | XP_001655105.1 | Met_5  |
|                                              | AAK93491.1     | D_mel  |
|                                              | NP_505590.1    | C_ele  |
|                                              | EKC23984.1     | C_gig  |
|                                              | XP_006811586.1 | S_kow  |
|                                              | NP_990423.1    | G_gal  |

|                                                 |                |        |
|-------------------------------------------------|----------------|--------|
|                                                 | XP_001627844.1 | N_vec  |
|                                                 | XP_007418648.1 | Fun_1  |
|                                                 | XP_007338082.1 | Fun_2  |
|                                                 | XP_008088124.1 | Fun_3  |
|                                                 | XP_007265168.1 | Fun_4  |
|                                                 | AEE37279.1     | Fun_5  |
|                                                 | XP_008710540.1 | Fun_6  |
|                                                 | CDS03471.1     | Fun_7  |
|                                                 | KFY32162.1     | Fun_8  |
|                                                 | CCM05158.1     | Fun_9  |
|                                                 | NP_595070.1    | Fun_10 |
|                                                 | XP_002951308.1 | Pro_1  |
|                                                 | CCA23797.1     | Pro_2  |
|                                                 | XP_005646096.1 | Pro_3  |
|                                                 | XP_001701046.1 | Pro_4  |
|                                                 | KFM26394.1     | Pro_5  |
|                                                 | XP_002966050.1 | Pla_1  |
|                                                 | XP_001764010.1 | Pla_2  |
|                                                 | XP_004151682.1 | Pla_3  |
|                                                 | XP_003630404.1 | Pla_4  |
|                                                 | CDO98669.1     | Pla_5  |
|                                                 | WP_023395609.1 | Arc_1  |
|                                                 | WP_004054285.1 | Arc_2  |
|                                                 | WP_006671834.1 | Arc_3  |
|                                                 | WP_013880559.1 | Arc_4  |
|                                                 | WP_008893704.1 | Arc_5  |
|                                                 | WP_008599630.1 | Eub_1  |
|                                                 | WP_015148708.1 | Eub_2  |
|                                                 | WP_027714125.1 | Eub_3  |
|                                                 | WP_015199377.1 | Eub_4  |
|                                                 | WP_015203442.1 | Eub_5  |
| maker-scaffold1195_size29765-augustus-gene-0.13 | CCF36248.1     | Fun_1  |
|                                                 | EXK77392.1     | Fun_2  |
|                                                 | EQB47608.1     | Fun_3  |
|                                                 | KEF54943.1     | Fun_4  |
|                                                 | ERT01442.1     | Fun_5  |
|                                                 | WP_012694949.1 | Eub_1  |
|                                                 | WP_026224969.1 | Eub_2  |
|                                                 | EWS60166.1     | Eub_3  |
|                                                 | WP_012929377.1 | Eub_4  |
|                                                 | WP_011659296.1 | Eub_5  |
|                                                 | WP_032003234.1 | Eub_6  |
|                                                 | WP_013442119.1 | Eub_7  |
|                                                 | EWC91883.1     | Eub_8  |
|                                                 | AHG49912.1     | Eub_9  |

|                                                           |                |        |
|-----------------------------------------------------------|----------------|--------|
|                                                           | WP_028111420.1 | Eub_10 |
| augustus_masked-scaffold3707_size17255-processed-gene-0.4 | XP_002111309.1 | Met_1  |
|                                                           | XP_003087040.1 | Met_2  |
|                                                           | EHJ77374.1     | Met_3  |
|                                                           | ELR04516.1     | Fun_1  |
|                                                           | KFA81525.1     | Fun_2  |
|                                                           | KFY27804.1     | Fun_3  |
|                                                           | XP_006679297.1 | Fun_4  |
|                                                           | EXX77460.1     | Fun_5  |
|                                                           | XP_005702535.1 | Pro_1  |
|                                                           | XP_005854422.1 | Pro_2  |
|                                                           | EJK75808.1     | Pro_3  |
|                                                           | CBN75524.1     | Pro_4  |
|                                                           | XP_009040352.1 | Pro_5  |
|                                                           | XP_002539044.1 | Pla_1  |
|                                                           | WP_013645432.1 | Arc_1  |
|                                                           | WP_013328829.1 | Arc_2  |
|                                                           | WP_011447903.1 | Arc_3  |
|                                                           | WP_015591536.1 | Arc_4  |
|                                                           | WP_011991228.1 | Arc_5  |
|                                                           | WP_035601819.1 | Eub_1  |
|                                                           | WP_007418610.1 | Eub_2  |
|                                                           | WP_012376477.1 | Eub_3  |
|                                                           | WP_020147014.1 | Eub_4  |
|                                                           | AHF89923.1     | Eub_5  |
|                                                           | WP_013043507.1 | Eub_6  |
|                                                           | WP_017315687.1 | Eub_7  |
|                                                           | WP_015137331.1 | Eub_8  |
|                                                           | WP_015126572.1 | Eub_9  |
|                                                           | WP_002650501.1 | Eub_10 |
| augustus_masked-scaffold5948_size12860-processed-gene-0.1 | WP_010594873.1 | Eub_1  |
|                                                           | CDI81106.1     | Pro_1  |
|                                                           | XP_005111876.1 | Met_1  |
| maker-scaffold6486_size12099-snap-gene-0.18               | XP_003390335.1 | Met_1  |
|                                                           | ELU12484.1     | Met_2  |
|                                                           | KGQ02393.1     | Fun_1  |
|                                                           | KGQ13406.1     | Fun_2  |
|                                                           | KGQ02342.1     | Fun_3  |
|                                                           | KGQ13404.1     | Fun_4  |
|                                                           | KGQ02394.1     | Fun_5  |
|                                                           | EEC76774.1     | Pla_1  |
|                                                           | XP_010911353.1 | Pla_2  |
|                                                           | WP_007541015.1 | Arc_2  |
|                                                           | WP_012944029.1 | Arc_3  |
|                                                           | WP_008607546.1 | Arc_4  |



|                                                |                |        |
|------------------------------------------------|----------------|--------|
|                                                | WP_006055763.1 | Arc_5  |
|                                                | WP_006018912.1 | Eub_1  |
|                                                | WP_011471316.1 | Eub_2  |
|                                                | All86748.1     | Eub_3  |
|                                                | WP_012187081.1 | Eub_4  |
|                                                | WP_015014915.1 | Eub_5  |
|                                                | WP_020279833.1 | Eub_6  |
|                                                | WP_018130303.1 | Eub_7  |
|                                                | WP_037375066.1 | Eub_8  |
|                                                | AFV25996.1     | Eub_9  |
|                                                | WP_011288498.1 | Eub_10 |
| maker-scaffold936_size32981-augustus-gene-0.15 | AFX93751.1     | Met_1  |
|                                                | KDR09962.1     | Met_2  |
|                                                | XP_003490817.1 | Met_3  |
|                                                | XP_006614807.1 | Met_4  |
|                                                | CDW60486.1     | Met_5  |
|                                                | XP_001640909.1 | N_vec  |
|                                                | EIF45432.1     | Fun_1  |
|                                                | KGQ13002.1     | Fun_2  |
|                                                | ELQ74691.1     | Fun_3  |
|                                                | CEG65883.1     | Fun_4  |
|                                                | KGG50167.1     | Fun_5  |
|                                                | XP_002176228.1 | Pro_1  |
|                                                | XP_009826895.1 | Pro_2  |
|                                                | XP_002499746.1 | Pro_3  |
|                                                | ETK94526.1     | Pro_4  |
|                                                | XP_005651543.1 | Pro_5  |
|                                                | XP_002539349.1 | Pla_1  |
|                                                | XP_010520015.1 | Pla_2  |
|                                                | XP_009601586.1 | Pla_3  |
|                                                | XP_006399478.1 | Pla_4  |
|                                                | AAL08291.1     | Pla_5  |
|                                                | WP_006089579.1 | Arc_1  |
|                                                | WP_007700009.1 | Arc_2  |
|                                                | WP_008010667.1 | Arc_3  |
|                                                | KDE59489.1     | Arc_4  |
|                                                | AHG03927.1     | Arc_5  |
|                                                | WP_027322509.1 | Eub_1  |
|                                                | WP_019391572.1 | Eub_2  |
|                                                | WP_034305480.1 | Eub_3  |
|                                                | WP_018931782.1 | Eub_4  |
|                                                | WP_013282559.1 | Eub_5  |
|                                                | WP_014974776.1 | Eub_6  |
|                                                | WP_023956523.1 | Eub_7  |
|                                                | WP_019880535.1 | Eub_8  |

|                                             |                |        |
|---------------------------------------------|----------------|--------|
|                                             | WP_036718162.1 | Eub_9  |
|                                             | WP_011419514.1 | Eub_10 |
| maker-scaffold13328_size7081-snap-gene-0.6  | XP_002593443.1 | Met_1  |
|                                             | AFN10620.1     | Met_2  |
|                                             | XP_004033436.1 | Met_3  |
|                                             | XP_008963953.1 | Met_4  |
|                                             | NP_525007.1    | D_mel  |
|                                             | XP_001631296.1 | C_ele  |
|                                             | XP_002735096.1 | S_kow  |
|                                             | XP_426504.2    | G_gal  |
|                                             | XP_001631296.1 | N_vec  |
|                                             | XP_005761116.1 | Pro_1  |
|                                             | XP_005649452.1 | Pro_2  |
|                                             | KDO27278.1     | Pro_3  |
|                                             | EJK73538.1     | Pro_4  |
|                                             | XP_005649451.1 | Pro_5  |
|                                             | BAK00429.1     | Pla_1  |
|                                             | EMS60087.1     | Pla_2  |
|                                             | ACN28695.1     | Pla_3  |
|                                             | XP_006664936.1 | Pla_4  |
|                                             | KDP27744.1     | Pla_5  |
|                                             | WP_006165993.1 | Arc_1  |
|                                             | WP_023844498.1 | Arc_2  |
|                                             | Q8TTI0.2       | Arc_3  |
|                                             | WP_011020504.1 | Arc_4  |
|                                             | WP_035082641.1 | Eub_1  |
|                                             | WP_033289318.1 | Eub_2  |
|                                             | WP_026152055.1 | Eub_3  |
|                                             | WP_007920028.1 | Eub_4  |
|                                             | WP_028429931.1 | Eub_5  |
| maker-scaffold3315_size18320-snap-gene-0.10 | ERG81996.1     | Met_1  |
|                                             | XP_001897006.1 | Met_2  |
|                                             | XP_003140874.1 | Met_3  |
|                                             | XP_003031842.1 | Met_4  |
|                                             | EJW80422.1     | Met_5  |
|                                             | XP_003031842.1 | Fun_1  |
|                                             | XP_001836593.2 | Fun_2  |
|                                             | KDQ25016.1     | Fun_3  |
|                                             | XP_007844786.1 | Fun_4  |
|                                             | CCA71030.1     | Fun_5  |
|                                             | XP_007508888.1 | Pro_1  |
|                                             | XP_002508499.1 | Pro_2  |
|                                             | XP_005704929.1 | Pro_3  |
|                                             | XP_009042022.1 | Pro_4  |
|                                             | XP_005844860.1 | Pro_5  |

|                                                 |                |        |
|-------------------------------------------------|----------------|--------|
|                                                 | B9NJI2.1       | Pla_1  |
|                                                 | XP_010023871.1 | Pla_2  |
|                                                 | EYU18298.1     | Pla_3  |
|                                                 | XP_006354455.1 | Pla_4  |
|                                                 | EPS70702.1     | Pla_5  |
|                                                 | ERH04195.1     | Arc_1  |
|                                                 | EGQ40327.1     | Arc_2  |
|                                                 | WP_010979030.1 | Arc_3  |
|                                                 | WP_012433147.1 | Eub_1  |
|                                                 | WP_012005966.1 | Eub_2  |
|                                                 | WP_020443882.1 | Eub_3  |
|                                                 | WP_007745917.1 | Eub_4  |
|                                                 | WP_012776286.1 | Eub_5  |
|                                                 | GAF60402.1     | Eub_6  |
|                                                 | WP_010808883.1 | Eub_7  |
|                                                 | WP_020204195.1 | Eub_8  |
|                                                 | WP_036846445.1 | Eub_9  |
|                                                 | WP_028834723.1 | Eub_10 |
| maker-scaffold301_size53378-augustus-gene-0.28  | XP_002835661.1 | Fun_1  |
|                                                 | KEQ95620.1     | Fun_2  |
|                                                 | XP_007782065.1 | Fun_3  |
|                                                 | EYE97134.1     | Fun_4  |
|                                                 | XP_002478659.1 | Fun_5  |
|                                                 | XP_003851279.1 | Fun_6  |
|                                                 | XP_007928828.1 | Fun_7  |
|                                                 | XP_007916978.1 | Fun_8  |
|                                                 | XP_007804270.1 | Fun_9  |
|                                                 | XP_007681732.1 | Fun_10 |
|                                                 | WP_034515623.1 | Eub_1  |
| maker-scaffold12736_size7442-augustus-gene-0.15 | XP_003391334.1 | Met_1  |
|                                                 | ELT99311.1     | Met_2  |
|                                                 | XP_002118984.1 | Met_3  |
|                                                 | XP_002411344.1 | Met_4  |
|                                                 | ETN83290.1     | Met_5  |
|                                                 | NP_730301.3    | D_mel  |
|                                                 | NP_506927.2    | C_ele  |
|                                                 | EKC17818.1     | C_gig  |
|                                                 | XP_006814548.1 | S_kow  |
|                                                 | CDM63411.1     | G_gal  |
|                                                 | XP_001618124.1 | N_vec  |
|                                                 | KGQ13492.1     | Fun_1  |
|                                                 | KGQ13060.1     | Fun_2  |
|                                                 | KGQ06042.1     | Fun_3  |
|                                                 | KGQ11395.1     | Fun_4  |
|                                                 | XP_006683391.1 | Fun_5  |

|                                                       |                |        |
|-------------------------------------------------------|----------------|--------|
|                                                       | YP_009106192.1 | Pro_1  |
|                                                       | YP_009020823.1 | Pro_2  |
|                                                       | YP_003058285.1 | Pro_3  |
|                                                       | YP_009105588.1 | Pro_4  |
|                                                       | NP_045832.1    | Pro_5  |
|                                                       | Q9G4F5.1       | Pla_1  |
|                                                       | KEH15262.1     | Pla_2  |
|                                                       | AET49971.1     | Pla_3  |
|                                                       | AET49981.1     | Pla_4  |
|                                                       | AET49973.1     | Pla_5  |
|                                                       | WP_013413695.1 | Arc_1  |
|                                                       | WP_014866799.1 | Arc_2  |
|                                                       | WP_011306046.1 | Arc_3  |
|                                                       | KGK99254.1     | Arc_4  |
|                                                       | WP_012617740.1 | Arc_5  |
|                                                       | WP_012455626.1 | Eub_1  |
|                                                       | WP_035609984.1 | Eub_2  |
|                                                       | WP_006390394.1 | Eub_3  |
|                                                       | WP_027475316.1 | Eub_4  |
|                                                       | WP_012496813.1 | Eub_5  |
|                                                       | WP_025138012.1 | Eub_6  |
|                                                       | WP_028249628.1 | Eub_7  |
|                                                       | WP_010807914.1 | Eub_8  |
|                                                       | WP_009518683.1 | Eub_9  |
|                                                       | KCB36226.1     | Eub_10 |
| snap_masked-scaffold23_size182404-processed-gene-0.32 | XP_003390005.1 | Met_1  |
|                                                       | AGG09876.1     | Met_2  |
|                                                       | XP_003493077.1 | Met_3  |
|                                                       | XP_003738673.1 | Met_4  |
|                                                       | GAA58105.1     | Met_5  |
|                                                       | XP_001639437.1 | N_vec  |
|                                                       | KDQ54527.1     | Fun_1  |
|                                                       | XP_007347977.1 | Fun_2  |
|                                                       | XP_007864003.1 | Fun_3  |
|                                                       | XP_007263351.1 | Fun_4  |
|                                                       | EJT48046.1     | Fun_5  |
|                                                       | XP_004344050.1 | Pro_1  |
|                                                       | XP_002957711.1 | Pro_2  |
|                                                       | KDO25841.1     | Pro_3  |
|                                                       | YP_002048931.1 | Pro_4  |
|                                                       | ETM55730.1     | Pro_5  |
|                                                       | XP_006349441.1 | Pla_1  |
|                                                       | XP_002299283.1 | Pla_2  |
|                                                       | XP_009616638.1 | Pla_3  |
|                                                       | XP_004308673.1 | Pla_4  |

|                                            |                |        |
|--------------------------------------------|----------------|--------|
|                                            | XP_007034443.1 | Pla_5  |
|                                            | WP_019265124.1 | Arc_1  |
|                                            | BAM70565.1     | Arc_2  |
|                                            | WP_012794906.1 | Arc_3  |
|                                            | WP_015324088.1 | Arc_4  |
|                                            | WP_007044926.1 | Arc_5  |
|                                            | WP_038104505.1 | Eub_1  |
|                                            | WP_013409982.1 | Eub_2  |
|                                            | WP_008503908.1 | Eub_3  |
|                                            | WP_020528805.1 | Eub_4  |
|                                            | WP_028665191.1 | Eub_5  |
|                                            | WP_018614696.1 | Eub_6  |
|                                            | WP_019941946.1 | Eub_7  |
|                                            | WP_014219091.1 | Eub_8  |
|                                            | WP_019654887.1 | Eub_9  |
|                                            | WP_019668624.1 | Eub_10 |
| maker-scaffold74_size115697-snap-gene-0.80 | XP_003476522.2 | Met_1  |
|                                            | XP_005074917.1 | Met_2  |
|                                            | XP_008980014.1 | Met_3  |
|                                            | XP_004419830.1 | Met_4  |
|                                            | CCD51607.1     | Fun_1  |
|                                            | KEZ42133.1     | Fun_2  |
|                                            | KDR70855.1     | Fun_3  |
|                                            | EXM13308.1     | Fun_4  |
|                                            | ERZ98251.1     | Fun_5  |
|                                            | KFM28438.1     | Pro_1  |
|                                            | XP_009525286.1 | Pro_2  |
|                                            | XP_002954015.1 | Pro_3  |
|                                            | XP_005645567.1 | Pro_4  |
|                                            | XP_006433979.1 | Pla_1  |
|                                            | EPS68601.1     | Pla_2  |
|                                            | XP_001770974.1 | Pla_3  |
|                                            | XP_006665175.1 | Pla_4  |
|                                            | WP_018031669.1 | Arc_1  |
|                                            | WP_013898711.1 | Arc_2  |
|                                            | AJB42102.1     | Arc_3  |
|                                            | WP_006666899.1 | Arc_4  |
|                                            | WP_013328338.1 | Arc_5  |
|                                            | WP_034469967.1 | Eub_1  |
|                                            | WP_024004493.1 | Eub_2  |
|                                            | WP_034849348.1 | Eub_3  |
|                                            | WP_030612374.1 | Eub_4  |
|                                            | WP_036594895.1 | Eub_5  |
|                                            | WP_020673966.1 | Eub_6  |
|                                            | WP_010558786.1 | Eub_7  |

|                                             |                |        |
|---------------------------------------------|----------------|--------|
|                                             | WP_037067205.1 | Eub_8  |
|                                             | EUB98133.1     | Eub_9  |
|                                             | WP_015102096.1 | Eub_10 |
| maker-scaffold741_size41061-snap-gene-0.36  | ERG81996.1     | Met_1  |
|                                             | XP_001897006.1 | Met_2  |
|                                             | XP_003140874.1 | Met_3  |
|                                             | EJW80422.1     | Met_4  |
|                                             | ABR10533.1     | Met_5  |
|                                             | XP_003031842.1 | Fun_1  |
|                                             | XP_001836593.2 | Fun_2  |
|                                             | KDQ25016.1     | Fun_3  |
|                                             | XP_007844786.1 | Fun_4  |
|                                             | CCA71030.1     | Fun_5  |
|                                             | XP_007508888.1 | Pro_1  |
|                                             | XP_002508499.1 | Pro_2  |
|                                             | XP_005704929.1 | Pro_3  |
|                                             | XP_009042022.1 | Pro_4  |
|                                             | XP_005844860.1 | Pro_5  |
|                                             | B9NJI2.1       | Pla_1  |
|                                             | XP_010023871.1 | Pla_2  |
|                                             | EYU18298.1     | Pla_3  |
|                                             | XP_006354455.1 | Pla_4  |
|                                             | EPS70702.1     | Pla_5  |
|                                             | WP_023505025.1 | Arc_1  |
|                                             | ERH04195.1     | Arc_2  |
|                                             | EGQ40327.1     | Arc_3  |
|                                             | WP_015020597.1 | Arc_4  |
|                                             | WP_010979030.1 | Arc_5  |
|                                             | WP_012433147.1 | Eub_1  |
|                                             | WP_012005966.1 | Eub_2  |
|                                             | GAK25757.1     | Eub_3  |
|                                             | WP_020443882.1 | Eub_4  |
|                                             | WP_012776286.1 | Eub_5  |
|                                             | WP_010808883.1 | Eub_6  |
|                                             | WP_020204195.1 | Eub_7  |
|                                             | WP_008112803.1 | Eub_8  |
|                                             | WP_028834723.1 | Eub_9  |
|                                             | WP_006216888.1 | Eub_10 |
| maker-scaffold1707_size25220-snap-gene-0.20 | XP_003731678.1 | Met_1  |
|                                             | XP_008189390.1 | Met_2  |
|                                             | ETN78939.1     | Met_3  |
|                                             | CEF64082.1     | Met_4  |
|                                             | KHJ89365.1     | Met_5  |
|                                             | NP_504589.1    | C_ele  |
|                                             | EIE85093.1     | Fun_1  |

|                                             |                |        |
|---------------------------------------------|----------------|--------|
|                                             | EIE87794.1     | Fun_2  |
|                                             | CEI86637.1     | Fun_3  |
|                                             | EPB83410.1     | Fun_4  |
|                                             | CDH56944.1     | Fun_5  |
|                                             | XP_005703492.1 | Pro_1  |
|                                             | XP_005645176.1 | Pro_2  |
|                                             | KDD75725.1     | Pro_3  |
|                                             | XP_002673099.1 | Pro_4  |
|                                             | ETP23068.1     | Pro_5  |
|                                             | XP_006656771.1 | Pla_1  |
|                                             | XP_004964872.1 | Pla_2  |
|                                             | XP_009362376.1 | Pla_3  |
|                                             | XP_004155438.1 | Pla_4  |
|                                             | KDP45639.1     | Pla_5  |
|                                             | WP_012107096.1 | Arc_1  |
|                                             | WP_012034393.1 | Arc_2  |
|                                             | WP_011305459.1 | Arc_3  |
|                                             | WP_004594272.1 | Arc_4  |
|                                             | WP_007274653.1 | Arc_5  |
|                                             | WP_031294976.1 | Eub_1  |
|                                             | WP_024275156.1 | Eub_2  |
|                                             | WP_003588285.1 | Eub_3  |
|                                             | WP_028207412.1 | Eub_4  |
|                                             | WP_006018784.1 | Eub_5  |
|                                             | WP_024574813.1 | Eub_6  |
|                                             | WP_027583392.1 | Eub_7  |
|                                             | WP_014619199.1 | Eub_8  |
|                                             | WP_036112488.1 | Eub_9  |
|                                             | WP_035361153.1 | Eub_10 |
| maker-scaffold1303_size28699-snap-gene-0.21 | XP_002806104.1 | Met_1  |
|                                             | XP_002192539.2 | Met_2  |
|                                             | XP_005419195.1 | Met_3  |
|                                             | XP_006978840.1 | Met_4  |
|                                             | XP_002593243.1 | Met_5  |
|                                             | NP_610527.1    | D_mel  |
|                                             | NP_509293.1    | C_ele  |
|                                             | EKC37376.1     | C_gig  |
|                                             | XP_006817962.1 | S_kow  |
|                                             | XP_004938622.1 | G_gal  |
|                                             | XP_001617488.1 | N_vec  |
|                                             | KFH62725.1     | Fun_1  |
|                                             | EPZ32472.1     | Fun_2  |
|                                             | XP_007390932.1 | Fun_3  |
|                                             | XP_006681728.1 | Fun_4  |
|                                             | CDS03933.1     | Fun_5  |

|                                             |                |        |
|---------------------------------------------|----------------|--------|
|                                             | YP_002049302.1 | Pro_1  |
|                                             | XP_001617488.1 | Pro_2  |
|                                             | XP_005710624.1 | Pro_3  |
|                                             | ACX71633.1     | Pro_4  |
|                                             | XP_002957277.1 | Pro_5  |
|                                             | XP_002308127.1 | Pla_1  |
|                                             | AHN05002.1     | Pla_2  |
|                                             | XP_010106943.1 | Pla_3  |
|                                             | XP_006286189.1 | Pla_4  |
|                                             | XP_010533062.1 | Pla_5  |
|                                             | WP_013295310.1 | Arc_1  |
|                                             | WP_015732954.1 | Arc_2  |
|                                             | WP_012067872.1 | Arc_3  |
|                                             | WP_023991902.1 | Arc_4  |
|                                             | WP_012955649.1 | Arc_5  |
|                                             | WP_018616254.1 | Eub_1  |
|                                             | WP_026763945.1 | Eub_2  |
|                                             | WP_028787142.1 | Eub_3  |
|                                             | WP_038106951.1 | Eub_4  |
|                                             | WP_014216622.1 | Eub_5  |
|                                             | AHF16791.1     | Eub_6  |
|                                             | WP_012789332.1 | Eub_7  |
|                                             | WP_039142427.1 | Eub_8  |
|                                             | WP_018628351.1 | Eub_9  |
|                                             | WP_026897004.1 | Eub_10 |
| maker-scaffold1970_size23533-snap-gene-0.24 | EXL66283.1     | Fun_1  |
|                                             | CCF36248.1     | Fun_2  |
|                                             | XP_002652421.1 | Fun_3  |
|                                             | XP_003190649.1 | Fun_4  |
|                                             | XP_007915781.1 | Fun_5  |
|                                             | ETI54099.1     | Pro_1  |
|                                             | AIF84065.1     | Arc_1  |
|                                             | WP_008894305.1 | Arc_2  |
|                                             | WP_006107378.1 | Arc_3  |
|                                             | WP_013328432.1 | Arc_4  |
|                                             | AHG49912.1     | Eub_1  |
|                                             | WP_012694949.1 | Eub_2  |
|                                             | WP_026224969.1 | Eub_3  |
|                                             | WP_035141167.1 | Eub_4  |
|                                             | WP_012929377.1 | Eub_5  |
|                                             | WP_028111420.1 | Eub_6  |
|                                             | WP_028771385.1 | Eub_7  |
|                                             | WP_032003234.1 | Eub_8  |
|                                             | WP_013995789.1 | Eub_9  |
|                                             | EWS60166.1     | Eub_10 |



|                                                |                |        |
|------------------------------------------------|----------------|--------|
| maker-scaffold714_size37228-augustus-gene-0.11 | CDQ90276.1     | Met_1  |
|                                                | XP_002411894.1 | Met_2  |
|                                                | XP_005171639.1 | Met_3  |
|                                                | XP_010901437.1 | Met_4  |
|                                                | KFP89560.1     | Met_5  |
|                                                | NP_001012711.1 | G_gal  |
|                                                | XP_001635175.1 | N_vec  |
|                                                | EPT06168.1     | Fun_1  |
|                                                | EPB90531.1     | Fun_2  |
|                                                | XP_007328597.1 | Fun_3  |
|                                                | EJT50757.1     | Fun_4  |
|                                                | KDQ27630.1     | Fun_5  |
|                                                | XP_003064880.1 | Pro_1  |
|                                                | XP_005833326.1 | Pro_2  |
|                                                | XP_005646672.1 | Pro_3  |
|                                                | XP_004339910.1 | Pro_4  |
|                                                | XP_005705278.1 | Pro_5  |
|                                                | XP_006409693.1 | Pla_1  |
|                                                | XP_009112246.1 | Pla_2  |
|                                                | XP_004242768.1 | Pla_3  |
|                                                | XP_010467174.1 | Pla_4  |
|                                                | XP_006297991.1 | Pla_5  |
|                                                | XP_009601472.1 | Pla_6  |
|                                                | NP_001169715.1 | Pla_7  |
|                                                | EYU34983.1     | Pla_8  |
|                                                | XP_002448043.1 | Pla_9  |
|                                                | XP_010533132.1 | Pla_10 |
|                                                | WP_004156226.1 | Eub_1  |
|                                                | WP_008254071.1 | Eub_2  |
|                                                | WP_035709327.1 | Eub_3  |
|                                                | WP_007398271.1 | Eub_4  |
|                                                | WP_028480955.1 | Eub_5  |
| maker-scaffold23270_size2748-snap-gene-0.5     | XP_002118984.1 | Met_1  |
|                                                | XP_003391334.1 | Met_2  |
|                                                | ELT99311.1     | Met_3  |
|                                                | XP_003699130.1 | Met_4  |
|                                                | CDW58876.1     | Met_5  |
|                                                | NP_649002.2    | D_mel  |
|                                                | T31617         | C_ele  |
|                                                | EKC17818.1     | C_gig  |
|                                                | XP_006815639.1 | S_kow  |
|                                                | XP_419578.3    | G_gal  |
|                                                | XP_001618124.1 | N_vec  |
|                                                | KGQ13756.1     | Fun_1  |
|                                                | KGQ13060.1     | Fun_2  |

|                                                |                |        |
|------------------------------------------------|----------------|--------|
|                                                | KGQ11395.1     | Fun_3  |
|                                                | XP_006683391.1 | Fun_4  |
|                                                | KGQ11088.1     | Fun_5  |
|                                                | NP_038429.1    | Pro_1  |
|                                                | YP_001019096.1 | Pro_2  |
|                                                | YP_009104843.1 | Pro_3  |
|                                                | YP_009105303.1 | Pro_4  |
|                                                | YP_009057862.1 | Pro_5  |
|                                                | Q9G4F5.1       | Pla_1  |
|                                                | AET49991.1     | Pla_2  |
|                                                | AET49983.1     | Pla_3  |
|                                                | AET49973.1     | Pla_4  |
|                                                | AET50438.1     | Pla_5  |
|                                                | WP_014734334.1 | Arc_1  |
|                                                | AIU70275.1     | Arc_2  |
|                                                | AIF69503.1     | Arc_3  |
|                                                | WP_013303172.1 | Arc_4  |
|                                                | WP_020863289.1 | Arc_5  |
|                                                | WP_014198142.1 | Eub_1  |
|                                                | WP_027135204.1 | Eub_2  |
|                                                | WP_011940683.1 | Eub_3  |
|                                                | WP_036811241.1 | Eub_4  |
|                                                | BAO84414.1     | Eub_5  |
|                                                | WP_011478976.1 | Eub_6  |
|                                                | WP_006977611.1 | Eub_7  |
|                                                | WP_002718400.1 | Eub_8  |
|                                                | WP_014743767.1 | Eub_9  |
|                                                | WP_014253865.1 | Eub_10 |
| maker-scaffold6300_size12324-augustus-gene-0.6 | XP_002604501.1 | Met_1  |
|                                                | XP_002159609.1 | Met_2  |
|                                                | XP_005095151.1 | Met_3  |
|                                                | XP_002164963.2 | Met_4  |
|                                                | XP_009057420.1 | Met_5  |
|                                                | EKC23227.1     | C_gig  |
|                                                | XP_002737725.1 | S_kow  |
|                                                | XP_001628381.1 | N_vec  |
|                                                | XP_007794286.1 | Fun_1  |
|                                                | XP_007275825.1 | Fun_2  |
|                                                | KFY77670.1     | Fun_3  |
|                                                | XP_007306115.1 | Fun_4  |
|                                                | XP_001547379.1 | Fun_5  |
|                                                | ETO07630.1     | Pro_1  |
|                                                | XP_002953862.1 | Pro_2  |
|                                                | XP_003287902.1 | Pro_3  |
|                                                | KFM27798.1     | Pro_4  |

|                                                           |                |        |
|-----------------------------------------------------------|----------------|--------|
|                                                           | XP_005837090.1 | Pro_5  |
|                                                           | XP_001772057.1 | Pla_1  |
|                                                           | XP_008227861.1 | Pla_2  |
|                                                           | XP_006848003.1 | Pla_3  |
|                                                           | XP_002526188.1 | Pla_4  |
|                                                           | XP_004152260.1 | Pla_5  |
|                                                           | WP_012966226.1 | Arc_1  |
|                                                           | WP_014289847.1 | Arc_2  |
|                                                           | WP_021789437.1 | Arc_3  |
|                                                           | WP_011022499.1 | Arc_4  |
|                                                           | WP_006184198.1 | Arc_5  |
|                                                           | WP_004462863.1 | Eub_1  |
|                                                           | WP_010742748.1 | Eub_2  |
|                                                           | WP_028445519.1 | Eub_3  |
|                                                           | WP_011669200.1 | Eub_4  |
|                                                           | WP_011163473.1 | Eub_5  |
|                                                           | GAF38603.1     | Eub_6  |
|                                                           | WP_038450915.1 | Eub_7  |
|                                                           | WP_021270991.1 | Eub_8  |
|                                                           | WP_002771241.1 | Eub_9  |
|                                                           | WP_011333596.1 | Eub_10 |
| augustus_masked-scaffold12066_size7863-processed-gene-0.3 | XP_002118959.1 | Met_1  |
|                                                           | ERL83435.1     | Met_2  |
|                                                           | ERL83750.1     | Met_3  |
|                                                           | XP_004703334.1 | Met_4  |
|                                                           | XP_008265796.1 | Met_5  |
|                                                           | NP_651281.1    | D_mel  |
|                                                           | NP_500396.2    | C_ele  |
|                                                           | EKC28295.1     | C_gig  |
|                                                           | XP_002741459.1 | S_kow  |
|                                                           | NP_001026322.1 | G_gal  |
|                                                           | XP_001629231.1 | N_vec  |
|                                                           | XP_001833294.1 | Fun_1  |
|                                                           | CCG82054.1     | Fun_2  |
|                                                           | XP_002791658.1 | Fun_3  |
|                                                           | CDS05260.1     | Fun_4  |
|                                                           | EPB84866.1     | Fun_5  |
|                                                           | XP_004345355.1 | Pro_1  |
|                                                           | XP_005849584.1 | Pro_2  |
|                                                           | XP_005717384.1 | Pro_3  |
|                                                           | KDD74654.1     | Pro_4  |
|                                                           | XP_001697738.1 | Pro_5  |
|                                                           | EDQ48391.1     | Pla_1  |
|                                                           | XP_008438188.1 | Pla_2  |
|                                                           | XP_009628694.1 | Pla_3  |

|                                                       |                |        |
|-------------------------------------------------------|----------------|--------|
|                                                       | XP_002963527.1 | Pla_4  |
|                                                       | ABK93110.1     | Pla_5  |
|                                                       | WP_010612452.1 | Arc_1  |
|                                                       | WP_004076747.1 | Arc_2  |
|                                                       | KHO51084.1     | Arc_3  |
|                                                       | WP_014867498.1 | Arc_4  |
|                                                       | WP_012035049.1 | Arc_5  |
|                                                       | WP_020084145.1 | Eub_1  |
|                                                       | WP_036261259.1 | Eub_2  |
|                                                       | BAQ17180.1     | Eub_3  |
|                                                       | WP_038035648.1 | Eub_4  |
|                                                       | WP_003608822.1 | Eub_5  |
|                                                       | WP_017930323.1 | Eub_6  |
|                                                       | WP_029032151.1 | Eub_7  |
|                                                       | WP_012591085.1 | Eub_8  |
|                                                       | WP_016919432.1 | Eub_9  |
|                                                       | WP_026191148.1 | Eub_10 |
| maker-scaffold668_size38133-augustus-gene-0.18        | CCT75179.1     | Fun_1  |
|                                                       | XP_007915781.1 | Fun_2  |
|                                                       | CEG03788.1     | Fun_3  |
|                                                       | ENH86162.1     | Fun_4  |
|                                                       | XP_002652421.1 | Fun_5  |
|                                                       | AIF84065.1     | Arc_1  |
|                                                       | WP_013328432.1 | Arc_2  |
|                                                       | WP_008321774.1 | Arc_3  |
|                                                       | WP_014406894.1 | Arc_4  |
|                                                       | WP_005554895.1 | Arc_5  |
|                                                       | WP_012929377.1 | Eub_1  |
|                                                       | WP_019615394.1 | Eub_2  |
|                                                       | WP_022841236.1 | Eub_3  |
|                                                       | WP_026554862.1 | Eub_4  |
|                                                       | WP_026224969.1 | Eub_5  |
|                                                       | WP_028764304.1 | Eub_6  |
|                                                       | WP_032552964.1 | Eub_7  |
|                                                       | WP_033092365.1 | Eub_8  |
|                                                       | WP_012155435.1 | Eub_9  |
|                                                       | KDN27447.1     | Eub_10 |
| snap_masked-scaffold5501_size13528-processed-gene-0.4 | XP_002115370.1 | Met_1  |
|                                                       | XP_784834.3    | Met_2  |
|                                                       | XP_003385092.1 | Met_3  |
|                                                       | XP_009859233.1 | Met_4  |
|                                                       | XP_002595879.1 | Met_5  |
|                                                       | ABY20525.1     | D_mel  |
|                                                       | NP_001122771.1 | C_ele  |
|                                                       | EKC25349.1     | C_gig  |

|                                               |                |        |
|-----------------------------------------------|----------------|--------|
|                                               | XP_002735842.1 | S_kow  |
|                                               | XP_001639606.1 | N_vec  |
|                                               | KDQ21556.1     | Fun_1  |
|                                               | XP_007766348.1 | Fun_2  |
|                                               | XP_006689693.1 | Fun_3  |
|                                               | XP_500422.1    | Fun_4  |
|                                               | CDO93299.1     | Fun_5  |
|                                               | GAM25728.1     | Pro_1  |
|                                               | EFA79031.1     | Pro_2  |
|                                               | XP_641412.1    | Pro_3  |
|                                               | XP_004350946.1 | Pro_4  |
|                                               | AIG56123.1     | Pro_5  |
|                                               | XP_006361557.1 | Pla_1  |
|                                               | XP_009779158.1 | Pla_2  |
|                                               | EYU25916.1     | Pla_3  |
|                                               | XP_010248964.1 | Pla_4  |
|                                               | XP_002315613.1 | Pla_5  |
|                                               | WP_014866607.1 | Arc_1  |
|                                               | WP_014866613.1 | Arc_2  |
|                                               | WP_009366644.1 | Arc_3  |
|                                               | WP_038008578.1 | Eub_1  |
|                                               | WP_018612052.1 | Eub_2  |
|                                               | WP_018630286.1 | Eub_3  |
|                                               | WP_014222462.1 | Eub_4  |
|                                               | AHF15920.1     | Eub_5  |
|                                               | WP_018616504.1 | Eub_6  |
|                                               | WP_026768040.1 | Eub_7  |
|                                               | WP_008511674.1 | Eub_8  |
|                                               | WP_027303192.1 | Eub_9  |
|                                               | WP_015333223.1 | Eub_10 |
| maker-scaffold80_size93979-augustus-gene-0.47 | XP_007353035.1 | Fun_1  |
|                                               | XP_007341488.1 | Fun_2  |
|                                               | EPT02934.1     | Fun_3  |
|                                               | ESA00332.1     | Fun_4  |
|                                               | EPT02936.1     | Fun_5  |
|                                               | CCX29845.1     | Fun_6  |
|                                               | EIT75643.1     | Fun_7  |
|                                               | EWC44163.1     | Fun_8  |
|                                               | CCX12997.1     | Fun_9  |
|                                               | WP_024543877.1 | Eub_1  |
|                                               | WP_036538167.1 | Eub_2  |
|                                               | WP_022421141.1 | Eub_3  |
| maker-scaffold81_size93674-augustus-gene-0.43 | XP_001635316.1 | Met_1  |
|                                               | XP_001625497.1 | N_vec  |
|                                               | CCA67478.1     | Fun_1  |

|                                                           |                |        |
|-----------------------------------------------------------|----------------|--------|
|                                                           | XP_011113843.1 | Fun_2  |
|                                                           | EYE90242.1     | Fun_3  |
|                                                           | KFH63080.1     | Fun_4  |
|                                                           | XP_011119164.1 | Fun_5  |
|                                                           | KFH62165.1     | Fun_6  |
|                                                           | XP_001396119.1 | Fun_7  |
|                                                           | KDQ07441.1     | Fun_8  |
|                                                           | XP_007308597.1 | Fun_9  |
|                                                           | XP_007784710.1 | Fun_10 |
|                                                           | XP_008619938.1 | Pro_1  |
|                                                           | XP_009846803.1 | Pro_2  |
|                                                           | XP_008612269.1 | Pro_3  |
|                                                           | KDO25464.1     | Pro_4  |
|                                                           | XP_008864995.1 | Pro_5  |
|                                                           | XP_001783997.1 | Pla_1  |
|                                                           | WP_020477589.1 | Eub_1  |
|                                                           | WP_012234898.1 | Eub_2  |
|                                                           | WP_031532596.1 | Eub_3  |
|                                                           | WP_034340452.1 | Eub_4  |
|                                                           | WP_021219852.1 | Eub_5  |
| augustus_masked-scaffold18573_size4385-processed-gene-0.0 | GAA58059.1     | Met_1  |
|                                                           | ELU00505.1     | Met_2  |
|                                                           | CDW58870.1     | Met_3  |
|                                                           | KGQ13804.1     | Fun_1  |
|                                                           | EQB46837.1     | Fun_2  |
|                                                           | WP_018998016.1 | Eub_1  |
|                                                           | WP_035550939.1 | Eub_2  |
|                                                           | WP_027837242.1 | Eub_3  |
|                                                           | WP_018148267.1 | Eub_4  |
|                                                           | WP_022694509.1 | Eub_5  |
|                                                           | WP_023430577.1 | Eub_6  |
|                                                           | WP_025315741.1 | Eub_7  |
|                                                           | WP_024515802.1 | Eub_8  |
|                                                           | ESQ80264.1     | Eub_9  |
|                                                           | WP_016848080.1 | Eub_10 |
| snap_masked-scaffold126_size77140-processed-gene-0.47     | CEF69733.1     | Met_1  |
|                                                           | XP_010873377.1 | Met_2  |
|                                                           | EYB85258.1     | Met_3  |
|                                                           | CDJ89535.1     | Met_4  |
|                                                           | XP_002126015.1 | Met_5  |
|                                                           | NP_728287.1    | D_mel  |
|                                                           | NP_502129.1    | C_ele  |
|                                                           | CAJ28912.1     | C_gig  |
|                                                           | XP_002735158.1 | S_kow  |
|                                                           | XP_001625748.1 | G_gal  |

|                                                        |                |        |
|--------------------------------------------------------|----------------|--------|
|                                                        | XP_425746.3    | N_vec  |
|                                                        | KGQ03886.1     | Fun_1  |
|                                                        | NP_593344.2    | Fun_2  |
|                                                        | EIE92264.1     | Fun_3  |
|                                                        | XP_003850503.1 | Fun_4  |
|                                                        | XP_006960118.1 | Fun_5  |
|                                                        | XP_001302152.1 | Pro_1  |
|                                                        | XP_002953022.1 | Pro_2  |
|                                                        | XP_004338851.1 | Pro_3  |
|                                                        | XP_003285028.1 | Pro_4  |
|                                                        | ETM39756.1     | Pro_5  |
|                                                        | O24357.1       | Pla_1  |
|                                                        | BAK22407.1     | Pla_2  |
|                                                        | AAD11426.1     | Pla_3  |
|                                                        | XP_010689260.1 | Pla_4  |
|                                                        | XP_009601968.1 | Pla_5  |
|                                                        | KHO54121.1     | Arc_1  |
|                                                        | EGQ40083.1     | Arc_2  |
|                                                        | WP_012911419.1 | Eub_1  |
|                                                        | WP_015941895.1 | Eub_2  |
|                                                        | WP_012256405.1 | Eub_3  |
|                                                        | WP_008680665.1 | Eub_4  |
|                                                        | CAJ71041.1     | Eub_5  |
|                                                        | WP_002652772.1 | Eub_6  |
|                                                        | WP_007906484.1 | Eub_7  |
|                                                        | WP_012120368.1 | Eub_8  |
|                                                        | WP_015167768.1 | Eub_9  |
|                                                        | WP_006529261.1 | Eub_10 |
| snap_masked-scaffold1017_size31835-processed-gene-0.17 | EFX83905.1     | Met_1  |
|                                                        | XP_003494251.1 | Met_2  |
|                                                        | XP_010559354.1 | Met_3  |
|                                                        | XP_004378960.1 | Met_4  |
|                                                        | XP_001617862.1 | N_vec  |
|                                                        | KGQ13982.1     | Fun_1  |
|                                                        | XP_003177581.1 | Fun_2  |
|                                                        | XP_007579619.1 | Fun_3  |
|                                                        | EME44586.1     | Fun_4  |
|                                                        | XP_003025685.1 | Fun_5  |
|                                                        | YP_002049168.1 | Pro_1  |
|                                                        | XP_004185929.1 | Pro_2  |
|                                                        | XP_002678007.1 | Pro_3  |
|                                                        | XP_004355659.1 | Pro_4  |
|                                                        | EFA83374.1     | Pro_5  |
|                                                        | WP_014435670.1 | Eub_1  |
|                                                        | WP_029631427.1 | Eub_2  |

|                                                      |                |        |
|------------------------------------------------------|----------------|--------|
|                                                      | WP_024789515.1 | Eub_3  |
|                                                      | WP_015902762.1 | Eub_4  |
|                                                      | WP_007474590.1 | Eub_5  |
|                                                      | WP_024787326.1 | Eub_6  |
|                                                      | WP_010048263.1 | Eub_7  |
|                                                      | WP_026441932.1 | Eub_8  |
|                                                      | WP_027069470.1 | Eub_9  |
|                                                      | WP_035354558.1 | Eub_10 |
| maker-scaffold6668_size11878-snap-gene-0.12          | CCF36248.1     | Fun_1  |
|                                                      | EXL66283.1     | Fun_2  |
|                                                      | ENH75308.1     | Fun_3  |
|                                                      | EQB47608.1     | Fun_4  |
|                                                      | EKG12172.1     | Fun_5  |
|                                                      | XP_002904646.1 | Pro_1  |
|                                                      | WP_009745183.1 | Eub_1  |
|                                                      | WP_028111420.1 | Eub_2  |
|                                                      | WP_013995789.1 | Eub_3  |
|                                                      | WP_035141167.1 | Eub_4  |
|                                                      | AHG49912.1     | Eub_5  |
|                                                      | EWS60166.1     | Eub_6  |
|                                                      | WP_011659296.1 | Eub_7  |
|                                                      | WP_026224969.1 | Eub_8  |
|                                                      | WP_024954492.1 | Eub_9  |
|                                                      | GAL64436.1     | Eub_10 |
| snap_masked-scaffold815_size34909-processed-gene-0.7 | ACD54692.1     | Met_1  |
|                                                      | AAH68857.1     | Met_2  |
|                                                      | XP_008940981.1 | Met_3  |
|                                                      | KFO12952.1     | Met_4  |
|                                                      | KFP27437.1     | Met_5  |
|                                                      | XP_002736730.1 | S_kow  |
|                                                      | NP_001025816.1 | G_gal  |
|                                                      | KEQ78741.1     | Fun_1  |
|                                                      | EWZ29179.1     | Fun_2  |
|                                                      | CEG03928.1     | Fun_3  |
|                                                      | CEI86337.1     | Fun_4  |
|                                                      | XP_002624644.1 | Fun_5  |
|                                                      | XP_002680137.1 | Pro_1  |
|                                                      | XP_005850260.1 | Pro_2  |
|                                                      | XP_007508961.1 | Pro_3  |
|                                                      | XP_003287526.1 | Pro_4  |
|                                                      | XP_001416652.1 | Pro_5  |
|                                                      | XP_009348165.1 | Pla_1  |
|                                                      | EPS64191.1     | Pla_2  |
|                                                      | XP_002536733.1 | Pla_3  |
|                                                      | XP_002870963.1 | Pla_4  |



|                                                 |                |        |
|-------------------------------------------------|----------------|--------|
|                                                 | WP_006077964.1 | Arc_1  |
|                                                 | WP_006882253.1 | Arc_2  |
|                                                 | WP_006091860.1 | Arc_3  |
|                                                 | WP_006056181.1 | Arc_4  |
|                                                 | WP_013446601.1 | Arc_5  |
|                                                 | WP_012166267.1 | Eub_1  |
|                                                 | KFE72029.1     | Eub_2  |
|                                                 | WP_032391925.1 | Eub_3  |
|                                                 | WP_034486151.1 | Eub_4  |
|                                                 | WP_026630463.1 | Eub_5  |
|                                                 | AHJ95389.1     | Eub_6  |
|                                                 | EMF30820.1     | Eub_7  |
|                                                 | WP_039545154.1 | Eub_8  |
|                                                 | WP_037286586.1 | Eub_9  |
|                                                 | KIA77623.1     | Eub_10 |
| maker-scaffold3236_size18566-augustus-gene-0.14 | XP_001863560.1 | Met_1  |
|                                                 | ETN64199.1     | Met_2  |
|                                                 | XP_002053679.1 | Met_3  |
|                                                 | XP_009859733.1 | Met_4  |
|                                                 | XP_003402903.1 | Met_5  |
|                                                 | XP_006811586.1 | S_kow  |
|                                                 | AAS49609.1     | G_gal  |
|                                                 | XP_007418648.1 | Fun_1  |
|                                                 | XP_007338082.1 | Fun_2  |
|                                                 | XP_007265168.1 | Fun_3  |
|                                                 | XP_008088124.1 | Fun_4  |
|                                                 | KFA79683.1     | Fun_5  |
|                                                 | XP_002951308.1 | Pro_1  |
|                                                 | CCA23797.1     | Pro_2  |
|                                                 | CCA26038.1     | Pro_3  |
|                                                 | XP_005851515.1 | Pro_4  |
|                                                 | XP_005646097.1 | Pro_5  |
|                                                 | CCI48539.1     | Pro_6  |
|                                                 | XP_001701046.1 | Pro_7  |
|                                                 | CCI48547.1     | Pro_8  |
|                                                 | EZG51530.1     | Pro_9  |
|                                                 | XP_009517353.1 | Pro_10 |
|                                                 | XP_002971447.1 | Pla_1  |
|                                                 | XP_001764010.1 | Pla_2  |
|                                                 | XP_002971446.1 | Pla_3  |
|                                                 | XP_004151682.1 | Pla_4  |
|                                                 | XP_003630404.1 | Pla_5  |
|                                                 | WP_023395609.1 | Arc_1  |
|                                                 | WP_006671834.1 | Arc_2  |
|                                                 | WP_013880559.1 | Arc_3  |

|                                                       |                |       |
|-------------------------------------------------------|----------------|-------|
|                                                       | WP_004054285.1 | Arc_4 |
|                                                       | AHF98631.1     | Arc_5 |
|                                                       | WP_017664906.1 | Eub_1 |
|                                                       | WP_015148708.1 | Eub_2 |
|                                                       | WP_039337939.1 | Eub_3 |
|                                                       | WP_031552011.1 | Eub_4 |
|                                                       | KHS42262.1     | Eub_5 |
| snap_masked-scaffold1455_size27142-processed-gene-0.8 | XP_002115537.1 | Met_1 |
|                                                       | XP_010718094.1 | Met_2 |
|                                                       | XP_002603534.1 | Met_3 |
|                                                       | XP_006268481.1 | Met_4 |
|                                                       | XP_008937854.1 | Met_5 |
|                                                       | AAM29426.1     | D_mel |
|                                                       | NP_499917.2    | C_ele |
|                                                       | EKC32886.1     | C_gig |
|                                                       | XP_006814856.1 | S_kow |
|                                                       | NP_001026638.1 | G_gal |
|                                                       | CEG64385.1     | Fun_1 |
|                                                       | EPB83705.1     | Fun_2 |
|                                                       | EIE81750.1     | Fun_3 |
|                                                       | KFH71279.1     | Fun_4 |
|                                                       | CDS06587.1     | Fun_5 |
|                                                       | KDO32230.1     | Pro_1 |
|                                                       | XP_008870509.1 | Pro_2 |
|                                                       | XP_003294319.1 | Pro_3 |
|                                                       | ETI49395.1     | Pro_4 |
|                                                       | XP_004333082.1 | Pro_5 |
|                                                       | ABR17689.1     | Pla_1 |
|                                                       | XP_006648248.1 | Pla_2 |
|                                                       | XP_010090722.1 | Pla_3 |
|                                                       | XP_004144903.1 | Pla_4 |
|                                                       | Q43768.1       | Pla_5 |
|                                                       | WP_016358804.1 | Arc_1 |
|                                                       | WP_013466491.1 | Arc_2 |
|                                                       | WP_013867239.1 | Arc_3 |
|                                                       | WP_011849820.1 | Arc_4 |
|                                                       | WP_012955740.1 | Arc_5 |
|                                                       | WP_018627148.1 | Eub_1 |
|                                                       | WP_038094260.1 | Eub_2 |
|                                                       | AHF16500.1     | Eub_3 |
|                                                       | WP_018617247.1 | Eub_4 |
|                                                       | WP_028787825.1 | Eub_5 |
|                                                       | WP_039138237.1 | Eub_6 |
|                                                       | WP_026772903.1 | Eub_7 |
|                                                       | WP_014221767.1 | Eub_8 |

|                                                       |                |        |
|-------------------------------------------------------|----------------|--------|
|                                                       | WP_026764122.1 | Eub_9  |
|                                                       | WP_014682200.1 | Eub_10 |
| snap_masked-scaffold878_size33947-processed-gene-0.18 | XP_002129957.1 | Met_1  |
|                                                       | XP_003698677.1 | Met_2  |
|                                                       | EHJ72678.1     | Met_3  |
|                                                       | XP_006860411.1 | Met_4  |
|                                                       | XP_008198812.1 | Met_5  |
|                                                       | CAR94311.1     | D_mel  |
|                                                       | NP_508282.2    | C_ele  |
|                                                       | EKC42344.1     | C_gig  |
|                                                       | NP_001171815.1 | S_kow  |
|                                                       | NP_990274.1    | G_gal  |
|                                                       | XP_001635838.1 | N_vec  |
|                                                       | KDE05724.1     | Fun_1  |
|                                                       | EMS20429.1     | Fun_2  |
|                                                       | EJT99034.1     | Fun_3  |
|                                                       | KDE09740.1     | Fun_4  |
|                                                       | KDE09741.1     | Fun_5  |
|                                                       | XP_004338019.1 | Pro_1  |
|                                                       | XP_005643770.1 | Pro_2  |
|                                                       | XP_005838806.1 | Pro_3  |
|                                                       | XP_001699466.1 | Pro_4  |
|                                                       | XP_005781104.1 | Pro_5  |
|                                                       | ACG33336.1     | Pla_1  |
|                                                       | XP_003579583.1 | Pla_2  |
|                                                       | XP_009392607.1 | Pla_3  |
|                                                       | XP_002311727.2 | Pla_4  |
|                                                       | XP_009616064.1 | Pla_5  |
|                                                       | WP_008604896.1 | Arc_1  |
|                                                       | KCZ70710.1     | Arc_2  |
|                                                       | WP_004572392.1 | Arc_3  |
|                                                       | WP_015589685.1 | Arc_4  |
|                                                       | WP_014513017.1 | Arc_5  |
|                                                       | WP_038200730.1 | Eub_1  |
|                                                       | WP_016848406.1 | Eub_2  |
|                                                       | WP_011442952.1 | Eub_3  |
|                                                       | WP_008738951.1 | Eub_4  |
|                                                       | WP_019573144.1 | Eub_5  |
|                                                       | WP_011952448.1 | Eub_6  |
|                                                       | WP_008905418.1 | Eub_7  |
|                                                       | WP_006575808.1 | Eub_8  |
|                                                       | WP_013395406.1 | Eub_9  |
|                                                       | WP_021003504.1 | Eub_10 |
| maker-scaffold6104_size12615-augustus-gene-0.9        | XP_008313450.1 | Met_1  |
|                                                       | XP_008701134.1 | Met_2  |

|                                                        |                |        |
|--------------------------------------------------------|----------------|--------|
|                                                        | KFP53927.1     | Met_3  |
|                                                        | XP_006127784.1 | Met_4  |
|                                                        | XP_006031586.1 | Met_5  |
|                                                        | NP_648343.1    | D_mel  |
|                                                        | NP_001022323.2 | C_ele  |
|                                                        | EKC43186.1     | C_gig  |
|                                                        | XP_002740401.1 | S_kow  |
|                                                        | XP_416454.1    | G_gal  |
|                                                        | XP_001634094.1 | N_vec  |
|                                                        | XP_002150272.1 | Fun_1  |
|                                                        | EYE94461.1     | Fun_2  |
|                                                        | GAD92769.1     | Fun_3  |
|                                                        | GAM38162.1     | Fun_4  |
|                                                        | XP_007783288.1 | Fun_5  |
|                                                        | EER41860.1     | Fun_6  |
|                                                        | XP_001820034.2 | Fun_7  |
|                                                        | XP_002483992.1 | Fun_8  |
|                                                        | XP_007699789.1 | Fun_9  |
|                                                        | XP_002837790.1 | Fun_10 |
|                                                        | XP_001016402.1 | Pro_1  |
|                                                        | CCA19296.1     | Pro_2  |
|                                                        | XP_008612667.1 | Pro_3  |
|                                                        | XP_002905635.1 | Pro_4  |
|                                                        | CCI11072.1     | Pro_5  |
|                                                        | EGQ39855.1     | Arc_1  |
|                                                        | WP_013295280.1 | Arc_2  |
|                                                        | WP_013267068.1 | Arc_3  |
|                                                        | WP_018033477.1 | Arc_4  |
|                                                        | WP_012310243.1 | Arc_5  |
|                                                        | WP_015353645.1 | Eub_1  |
|                                                        | WP_002694015.1 | Eub_2  |
|                                                        | WP_027885864.1 | Eub_3  |
|                                                        | WP_033094148.1 | Eub_4  |
|                                                        | AHI31487.1     | Eub_5  |
| snap_masked-scaffold2280_size22025-processed-gene-0.10 | ACD54692.1     | Met_1  |
|                                                        | AAH68857.1     | Met_2  |
|                                                        | XP_008940981.1 | Met_3  |
|                                                        | KFP27437.1     | Met_4  |
|                                                        | KFO12952.1     | Met_5  |
|                                                        | XP_002736730.1 | S_kow  |
|                                                        | NP_001025816.1 | G_gal  |
|                                                        | KEQ78741.1     | Fun_1  |
|                                                        | EWZ29179.1     | Fun_2  |
|                                                        | CEG03928.1     | Fun_3  |
|                                                        | CEI86337.1     | Fun_4  |

|                                                |                |        |
|------------------------------------------------|----------------|--------|
|                                                | XP_002624644.1 | Fun_5  |
|                                                | XP_002680137.1 | Pro_1  |
|                                                | XP_005850260.1 | Pro_2  |
|                                                | XP_003287526.1 | Pro_3  |
|                                                | EFA85925.1     | Pro_4  |
|                                                | XP_007508961.1 | Pro_5  |
|                                                | XP_009348165.1 | Pla_1  |
|                                                | EPS64191.1     | Pla_2  |
|                                                | XP_010673662.1 | Pla_3  |
|                                                | XP_007218282.1 | Pla_4  |
|                                                | XP_002536733.1 | Pla_5  |
|                                                | WP_006077964.1 | Arc_1  |
|                                                | WP_006882253.1 | Arc_2  |
|                                                | WP_006091860.1 | Arc_3  |
|                                                | WP_004051141.1 | Arc_4  |
|                                                | WP_012942676.1 | Arc_5  |
|                                                | WP_012166267.1 | Eub_1  |
|                                                | KFE72029.1     | Eub_2  |
|                                                | WP_032391925.1 | Eub_3  |
|                                                | WP_034486151.1 | Eub_4  |
|                                                | WP_026630463.1 | Eub_5  |
|                                                | AHJ95389.1     | Eub_6  |
|                                                | EMF30820.1     | Eub_7  |
|                                                | WP_037286586.1 | Eub_8  |
|                                                | WP_039545154.1 | Eub_9  |
|                                                | WP_006341105.1 | Eub_10 |
| maker-scaffold505_size42588-augustus-gene-0.26 | CDW58869.1     | Met_1  |
|                                                | XP_002412211.1 | Met_2  |
|                                                | XP_002429700.1 | Met_3  |
|                                                | XP_008557991.1 | Met_4  |
|                                                | XP_001600500.3 | Met_5  |
|                                                | NP_001097800.1 | D_mel  |
|                                                | NP_508784.1    | C_ele  |
|                                                | EKC32808.1     | C_gig  |
|                                                | XP_006819255.1 | S_kow  |
|                                                | NP_989795.1    | G_gal  |
|                                                | XP_001633856.1 | N_vec  |
|                                                | XP_006675041.1 | Fun_1  |
|                                                | KFH72372.1     | Fun_2  |
|                                                | XP_003047675.1 | Fun_3  |
|                                                | EGU79127.1     | Fun_4  |
|                                                | CEG84518.1     | Fun_5  |
|                                                | XP_001825252.1 | Fun_6  |
|                                                | XP_002585229.1 | Fun_7  |
|                                                | KEY64896.1     | Fun_8  |

|                                                          |                |        |
|----------------------------------------------------------|----------------|--------|
|                                                          | KGQ02839.1     | Fun_9  |
|                                                          | XP_006969358.1 | Fun_10 |
|                                                          | XP_008604566.1 | Pro_1  |
|                                                          | CCI10344.1     | Pro_2  |
|                                                          | XP_009520062.1 | Pro_3  |
|                                                          | XP_008900549.1 | Pro_4  |
|                                                          | KDO31096.1     | Pro_5  |
|                                                          | NP_001130547.1 | Pla_1  |
|                                                          | XP_006414895.1 | Pla_2  |
|                                                          | XP_008441797.1 | Pla_3  |
|                                                          | AEZ06603.1     | Pla_4  |
|                                                          | NP_176658.1    | Pla_5  |
|                                                          | WP_015018905.1 | Arc_1  |
|                                                          | AIC14428.1     | Arc_2  |
|                                                          | AIF85373.1     | Arc_3  |
|                                                          | AIG98750.1     | Arc_4  |
|                                                          | WP_013295862.1 | Arc_5  |
|                                                          | WP_036760862.1 | Eub_1  |
|                                                          | WP_013787785.1 | Eub_2  |
|                                                          | WP_039746122.1 | Eub_3  |
|                                                          | WP_014759056.1 | Eub_4  |
|                                                          | WP_034122822.1 | Eub_5  |
| augustus_masked-scaffold9576_size9323-processed-gene-0.1 | XP_006679675.1 | Fun_1  |
|                                                          | KFH70558.1     | Fun_2  |
|                                                          | KGQ13027.1     | Fun_3  |
|                                                          | XP_006683186.1 | Fun_4  |
|                                                          | GAA99771.1     | Fun_5  |
|                                                          | XP_009534325.1 | Pro_1  |
|                                                          | XP_644484.1    | Pro_2  |
|                                                          | ETK91235.1     | Pro_3  |
|                                                          | XP_008605341.1 | Pro_4  |
|                                                          | XP_008876749.1 | Pro_5  |
|                                                          | XP_001760648.1 | Pla_1  |
|                                                          | EMS63829.1     | Pla_2  |
|                                                          | WP_006078928.1 | Arc_1  |
|                                                          | WP_023394045.1 | Arc_2  |
|                                                          | KDE60150.1     | Arc_3  |
|                                                          | WP_021055597.1 | Arc_4  |
|                                                          | WP_012942239.1 | Arc_5  |
|                                                          | WP_014704038.1 | Eub_1  |
|                                                          | WP_020593968.1 | Eub_2  |
|                                                          | WP_037256093.1 | Eub_3  |
|                                                          | KGM11498.1     | Eub_4  |
|                                                          | WP_019645166.1 | Eub_5  |
| maker-scaffold1407_size27578-augustus-gene-0.17          | XP_001601958.2 | Met_1  |

|                                                          |                |       |
|----------------------------------------------------------|----------------|-------|
|                                                          | XP_009017213.1 | Met_2 |
|                                                          | NP_001087172.1 | Met_3 |
|                                                          | XP_011064524.1 | Met_4 |
|                                                          | EFN63332.1     | Met_5 |
|                                                          | 4INE_A         | C_ele |
|                                                          | EKC35398.1     | C_gig |
|                                                          | XP_002739709.1 | S_kow |
|                                                          | XP_001232694.1 | G_gal |
|                                                          | XP_001634000.1 | N_vec |
|                                                          | XP_007596830.1 | Fun_1 |
|                                                          | XP_002569186.1 | Fun_2 |
|                                                          | EWG54069.1     | Fun_3 |
|                                                          | XP_001593795.1 | Fun_4 |
|                                                          | XP_459613.2    | Fun_5 |
|                                                          | XP_001580573.1 | Pro_1 |
|                                                          | XP_005713374.1 | Pro_2 |
|                                                          | XP_005773499.1 | Pro_3 |
|                                                          | EWM24131.1     | Pro_4 |
|                                                          | CBN78409.1     | Pro_5 |
|                                                          | XP_002968407.1 | Pla_1 |
|                                                          | XP_009348175.1 | Pla_2 |
|                                                          | XP_003579980.1 | Pla_3 |
|                                                          | AIU50555.1     | Pla_4 |
|                                                          | EMT16365.1     | Pla_5 |
|                                                          | WP_012186229.1 | Arc_1 |
|                                                          | WP_012617787.1 | Arc_2 |
|                                                          | WP_013775078.1 | Arc_3 |
|                                                          | WP_007983554.1 | Arc_4 |
|                                                          | WP_008296858.1 | Arc_5 |
|                                                          | WP_019215882.1 | Eub_1 |
|                                                          | WP_010298206.1 | Eub_2 |
|                                                          | WP_008347973.1 | Eub_3 |
|                                                          | WP_031498896.1 | Eub_4 |
|                                                          | ABM63527.1     | Eub_5 |
|                                                          | WP_022585625.1 | Eub_6 |
|                                                          | WP_016641614.1 | Eub_7 |
|                                                          | WP_029057614.1 | Eub_8 |
|                                                          | BAP56505.1     | Eub_9 |
| augustus_masked-scaffold9669_size9263-processed-gene-0.3 | ELT97960.1     | Met_1 |
|                                                          | KDR09741.1     | Met_2 |
|                                                          | KFM68371.1     | Met_3 |
|                                                          | KFB43555.1     | Met_4 |
|                                                          | XP_002118651.1 | Met_5 |
|                                                          | AAN71524.1     | D_mel |
|                                                          | NP_001021098.1 | C_ele |

|                                                      |                |        |
|------------------------------------------------------|----------------|--------|
|                                                      | EKC26712.1     | C_gig  |
|                                                      | XP_002731411.1 | S_kow  |
|                                                      | XP_418755.2    | G_gal  |
|                                                      | XP_001618992.1 | N_vec  |
|                                                      | 2CDH_A         | Fun_1  |
|                                                      | KGQ11405.1     | Fun_2  |
|                                                      | CDS08812.1     | Fun_3  |
|                                                      | CDH56624.1     | Fun_4  |
|                                                      | EPB82703.1     | Fun_5  |
|                                                      | XP_005823341.1 | Pro_1  |
|                                                      | XP_002295282.1 | Pro_2  |
|                                                      | XP_002184832.1 | Pro_3  |
|                                                      | XP_005757743.1 | Pro_4  |
|                                                      | XP_009035098.1 | Pro_5  |
|                                                      | XP_004154138.1 | Pla_1  |
|                                                      | EPS57968.1     | Pla_2  |
|                                                      | XP_009609922.1 | Pla_3  |
|                                                      | XP_010247079.1 | Pla_4  |
|                                                      | XP_010099482.1 | Pla_5  |
|                                                      | WP_004557741.1 | Arc_1  |
|                                                      | KHO46614.1     | Arc_2  |
|                                                      | KHO44920.1     | Arc_3  |
|                                                      | ACD50086.1     | Arc_4  |
|                                                      | ABZ10239.1     | Arc_5  |
|                                                      | WP_019402450.1 | Eub_1  |
|                                                      | WP_026380570.1 | Eub_2  |
|                                                      | WP_038035251.1 | Eub_3  |
|                                                      | WP_029006643.1 | Eub_4  |
|                                                      | WP_013650826.1 | Eub_5  |
|                                                      | WP_037019720.1 | Eub_6  |
|                                                      | WP_026363019.1 | Eub_7  |
|                                                      | WP_002717667.1 | Eub_7  |
|                                                      | WP_013420191.1 | Eub_8  |
|                                                      | WP_026599453.1 | Eub_9  |
|                                                      | WP_037234575.1 | Eub_10 |
| snap_masked-scaffold9056_size9691-processed-gene-0.3 | XP_006531193.1 | Met_1  |
|                                                      | XP_008985607.1 | Met_2  |
|                                                      | XP_003148136.1 | Met_3  |
|                                                      | XP_007488547.1 | Met_4  |
|                                                      | XP_003915030.1 | Met_5  |
|                                                      | NP_648188.2    | D_mel  |
|                                                      | NP_496557.1    | C_ele  |
|                                                      | EKC21635.1     | C_gig  |
|                                                      | XP_006812871.1 | S_kow  |
|                                                      | XP_001626743.1 | N_vec  |



|                                                        |                |        |
|--------------------------------------------------------|----------------|--------|
|                                                        | EJT51597.1     | Fun_1  |
|                                                        | EPZ35788.1     | Fun_2  |
|                                                        | XP_006460072.1 | Fun_3  |
|                                                        | CEG63676.1     | Fun_4  |
|                                                        | XP_003851660.1 | Fun_5  |
|                                                        | XP_002260871.1 | Pro_1  |
|                                                        | XP_005702511.1 | Pro_2  |
|                                                        | XP_005535085.1 | Pro_3  |
|                                                        | XP_002142822.1 | Pro_4  |
|                                                        | XP_009690068.1 | Pro_5  |
|                                                        | EEE69722.1     | Pla_1  |
|                                                        | XP_010090007.1 | Pla_2  |
|                                                        | NP_001063201.2 | Pla_3  |
|                                                        | XP_007008769.1 | Pla_4  |
|                                                        | KHG22370.1     | Pla_5  |
|                                                        | WP_019176442.1 | Arc_1  |
|                                                        | WP_020448503.1 | Arc_2  |
|                                                        | AIF01059.1     | Arc_3  |
|                                                        | AIF20386.1     | Arc_4  |
|                                                        | WP_013304288.1 | Arc_5  |
|                                                        | WP_014559534.1 | Eub_1  |
|                                                        | WP_012475834.1 | Eub_2  |
|                                                        | WP_012909357.1 | Eub_3  |
|                                                        | WP_024124480.1 | Eub_4  |
|                                                        | WP_008274272.1 | Eub_5  |
|                                                        | WP_014787305.1 | Eub_6  |
|                                                        | WP_035404323.1 | Eub_7  |
|                                                        | WP_035359167.1 | Eub_8  |
|                                                        | WP_012509487.1 | Eub_9  |
|                                                        | WP_026386373.1 | Eub_10 |
| snap_masked-scaffold3_size1208507-processed-gene-1.67  | KGQ11486.1     | Fun_1  |
|                                                        | XP_003342548.1 | Fun_2  |
|                                                        | WP_006301239.1 | Eub_1  |
|                                                        | WP_011689073.1 | Eub_2  |
|                                                        | WP_021169337.1 | Eub_3  |
|                                                        | WP_038673988.1 | Eub_4  |
|                                                        | WP_009438161.1 | Eub_5  |
|                                                        | WP_029890012.1 | Eub_6  |
|                                                        | WP_007289605.1 | Eub_7  |
|                                                        | EFC91998.1     | Eub_8  |
|                                                        | WP_009851450.1 | Eub_9  |
|                                                        | WP_033297033.1 | Eub_10 |
| snap_masked-scaffold1340_size28252-processed-gene-0.28 | ACD54626.1     | Met_1  |
|                                                        | ACD54645.1     | Met_2  |
|                                                        | XP_001893058.1 | Met_3  |

|                                                       |                |        |
|-------------------------------------------------------|----------------|--------|
|                                                       | CDQ03277.1     | Met_4  |
|                                                       | EJD74412.1     | Met_5  |
|                                                       | NP_730974.1    | D_mel  |
|                                                       | NP_497031.1    | C_ele  |
|                                                       | EKC38462.1     | C_gig  |
|                                                       | XP_002734132.1 | S_kow  |
|                                                       | XP_420669.1    | G_gal  |
|                                                       | XP_001636143.1 | N_vec  |
|                                                       | KIH93225.1     | Fun_1  |
|                                                       | XP_001226343.1 | Fun_2  |
|                                                       | KFY39086.1     | Fun_3  |
|                                                       | CDK25302.1     | Fun_4  |
|                                                       | XP_007791962.1 | Fun_5  |
|                                                       | XP_004343968.1 | Pro_1  |
|                                                       | CBN74948.1     | Pro_2  |
|                                                       | GAM16829.1     | Pro_3  |
|                                                       | XP_001700799.1 | Pro_4  |
|                                                       | XP_008619723.1 | Pro_5  |
|                                                       | NP_001291332.1 | Pla_1  |
|                                                       | XP_010674766.1 | Pla_2  |
|                                                       | EYU34848.1     | Pla_3  |
|                                                       | XP_009769381.1 | Pla_4  |
|                                                       | XP_002517192.1 | Pla_5  |
|                                                       | WP_006077499.1 | Arc_1  |
|                                                       | WP_007997796.1 | Arc_2  |
|                                                       | WP_006065817.1 | Arc_3  |
|                                                       | WP_007551724.1 | Arc_4  |
|                                                       | WP_021058435.1 | Arc_5  |
|                                                       | WP_007910273.1 | Eub_1  |
|                                                       | WP_007915149.1 | Eub_2  |
|                                                       | GAM09081.1     | Eub_3  |
|                                                       | WP_013795904.1 | Eub_4  |
|                                                       | WP_013659948.1 | Eub_5  |
|                                                       | WP_015830888.1 | Eub_6  |
|                                                       | WP_027075673.1 | Eub_7  |
|                                                       | WP_015023955.1 | Eub_8  |
|                                                       | WP_014219737.1 | Eub_9  |
|                                                       | WP_007092866.1 | Eub_10 |
| snap_masked-scaffold962_size32525-processed-gene-0.12 | XP_007833246.1 | Fun_1  |
|                                                       | XP_007761072.1 | Fun_2  |
|                                                       | EGE08625.1     | Fun_3  |
|                                                       | KEF52212.1     | Fun_4  |
|                                                       | XP_003013217.1 | Fun_5  |
|                                                       | XP_001580573.1 | Pro_1  |
|                                                       | XP_007833246.1 | Pro_2  |

|                                                           |                |        |
|-----------------------------------------------------------|----------------|--------|
|                                                           | XP_004991255.1 | Pro_3  |
|                                                           | XP_007761072.1 | Pro_4  |
|                                                           | EGE08625.1     | Pro_5  |
|                                                           | XP_004137342.1 | Pla_1  |
|                                                           | AFW56731.1     | Pla_2  |
|                                                           | XP_003598143.1 | Pla_3  |
|                                                           | EMT02962.1     | Pla_4  |
|                                                           | WP_022532643.1 | Arc_1  |
|                                                           | WP_015504788.1 | Arc_2  |
|                                                           | WP_006628133.1 | Arc_3  |
|                                                           | WP_008386083.1 | Arc_4  |
|                                                           | WP_011499002.1 | Arc_5  |
|                                                           | CEG55859.1     | Eub_1  |
|                                                           | WP_016211643.1 | Eub_2  |
|                                                           | ABK51300.1     | Eub_3  |
|                                                           | WP_031415136.1 | Eub_4  |
|                                                           | WP_030668919.1 | Eub_5  |
|                                                           | CEG59739.1     | Eub_6  |
|                                                           | WP_031498896.1 | Eub_7  |
|                                                           | BAP56505.1     | Eub_8  |
|                                                           | WP_011134776.1 | Eub_9  |
|                                                           | WP_029057614.1 | Eub_10 |
|                                                           | WP_020554441.1 | Eub_11 |
|                                                           | WP_010298206.1 | Eub_12 |
|                                                           | WP_019350309.1 | Eub_13 |
|                                                           | WP_020519747.1 | Eub_14 |
|                                                           | CDR33214.1     | Eub_15 |
|                                                           | WP_008347973.1 | Eub_16 |
|                                                           | WP_024807775.1 | Eub_17 |
|                                                           | WP_014397962.1 | Eub_18 |
|                                                           | WP_019903222.1 | Eub_19 |
|                                                           | AIG81138.1     | Eub_20 |
| augustus_masked-scaffold1821_size45607-processed-gene-0.1 | XP_003728116.1 | Met_1  |
|                                                           | ELT95020.1     | Met_2  |
|                                                           | XP_011059306.1 | Met_3  |
|                                                           | XP_394075.2    | Met_4  |
|                                                           | EFN66599.1     | Met_5  |
|                                                           | NP_650955.1    | D_mel  |
|                                                           | NP_509306.2    | C_ele  |
|                                                           | EKC34455.1     | C_gig  |
|                                                           | XP_002740933.1 | S_kow  |
|                                                           | NP_001012912.1 | G_gal  |
|                                                           | XP_001634142.1 | N_vec  |
|                                                           | KDN68924.1     | Fun_1  |
|                                                           | XP_002472258.1 | Fun_2  |

|                                                        |                |        |
|--------------------------------------------------------|----------------|--------|
|                                                        | XP_008024997.1 | Fun_3  |
|                                                        | CDO73769.1     | Fun_4  |
|                                                        | EMD40491.1     | Fun_5  |
|                                                        | EHK40673.1     | Fun_6  |
|                                                        | XP_007365091.1 | Fun_7  |
|                                                        | XP_009851670.1 | Fun_8  |
|                                                        | XP_007675050.1 | Fun_9  |
|                                                        | XP_003351183.1 | Fun_10 |
|                                                        | XP_004335502.1 | Pro_1  |
|                                                        | XP_001701010.1 | Pro_2  |
|                                                        | XP_003294847.1 | Pro_3  |
|                                                        | XP_005838680.1 | Pro_4  |
|                                                        | ETP33338.1     | Pro_5  |
|                                                        | XP_002522468.1 | Pla_1  |
|                                                        | XP_008389453.1 | Pla_2  |
|                                                        | XP_006827316.1 | Pla_3  |
|                                                        | XP_010108696.1 | Pla_4  |
|                                                        | XP_009356318.1 | Pla_5  |
|                                                        | EET89913.1     | Arc_1  |
|                                                        | AIF16351.1     | Arc_2  |
|                                                        | WP_028833180.1 | Eub_1  |
|                                                        | AHF17277.1     | Eub_2  |
|                                                        | WP_036351736.1 | Eub_3  |
|                                                        | EIM93886.1     | Eub_4  |
|                                                        | WP_036353620.1 | Eub_5  |
| maker-scaffold962_size32525-snap-gene-0.37             | XP_002619069.1 | Fun_1  |
|                                                        | XP_003851796.1 | Fun_2  |
|                                                        | XP_007375689.1 | Fun_3  |
|                                                        | CDK29424.1     | Fun_4  |
|                                                        | XP_003869357.1 | Fun_5  |
|                                                        | XP_004334482.1 | Pro_1  |
|                                                        | WP_011163281.1 | Eub_1  |
|                                                        | EQC48417.1     | Eub_2  |
|                                                        | WP_013965635.1 | Eub_3  |
|                                                        | WP_025223565.1 | Eub_4  |
|                                                        | WP_035939087.1 | Eub_5  |
|                                                        | WP_009386051.1 | Eub_6  |
|                                                        | WP_020183501.1 | Eub_7  |
|                                                        | WP_010508354.1 | Eub_8  |
|                                                        | WP_035152282.1 | Eub_9  |
|                                                        | WP_035120695.1 | Eub_10 |
| snap_masked-scaffold4287_size15745-processed-gene-0.5  | no hits        |        |
| snap_masked-scaffold4718_size14934-processed-gene-0.15 | CDW59746.1     | Met_1  |
|                                                        | XP_002119052.1 | Met_2  |
|                                                        | 3DKN_A         | Met_3  |

|                                                       |                |        |
|-------------------------------------------------------|----------------|--------|
|                                                       | XP_009681318.1 | Met_4  |
|                                                       | XP_009881313.1 | Met_5  |
|                                                       | NP_609034.1    | D_mel  |
|                                                       | NP_001255838.1 | C_ele  |
|                                                       | EKC26790.1     | C_gig  |
|                                                       | XP_006816377.1 | S_kow  |
|                                                       | XP_424024.4    | G_gal  |
|                                                       | XP_001628073.1 | N_vec  |
|                                                       | KGQ02389.1     | Fun_1  |
|                                                       | EXX53139.1     | Fun_2  |
|                                                       | CDO68422.1     | Fun_3  |
|                                                       | EJT48324.1     | Fun_4  |
|                                                       | ESW99430.1     | Fun_5  |
|                                                       | YP_009027579.1 | Pro_1  |
|                                                       | NP_050786.1    | Pro_2  |
|                                                       | YP_001293597.1 | Pro_3  |
|                                                       | P38397.1       | Pro_4  |
|                                                       | NP_053907.1    | Pro_5  |
|                                                       | XP_009350065.1 | Pla_1  |
|                                                       | CDP02922.1     | Pla_2  |
|                                                       | KDP34242.1     | Pla_3  |
|                                                       | XP_007138413.1 | Pla_4  |
|                                                       | XP_010048699.1 | Pla_5  |
|                                                       | WP_012310215.1 | Arc_1  |
|                                                       | WP_012965661.1 | Arc_2  |
|                                                       | WP_011012942.1 | Arc_3  |
|                                                       | WP_011832482.1 | Arc_4  |
|                                                       | WP_040681599.1 | Arc_5  |
|                                                       | WP_014438266.1 | Eub_1  |
|                                                       | WP_015244086.1 | Eub_2  |
|                                                       | WP_013628404.1 | Eub_3  |
|                                                       | CAJ73737.1     | Eub_4  |
|                                                       | WP_007221923.1 | Eub_5  |
|                                                       | WP_013564967.1 | Eub_6  |
|                                                       | WP_002649732.1 | Eub_7  |
|                                                       | WP_002655454.1 | Eub_8  |
|                                                       | WP_010587091.1 | Eub_9  |
|                                                       | WP_020476317.1 | Eub_10 |
| snap_masked-scaffold10640_size8688-processed-gene-0.5 | ELU11586.1     | Met_1  |
|                                                       | XP_002609272.1 | Met_2  |
|                                                       | XP_007766017.1 | Fun_1  |
|                                                       | XP_008032395.1 | Fun_2  |
|                                                       | XP_011102440.1 | Fun_3  |
|                                                       | XP_001396961.1 | Fun_4  |
|                                                       | XP_007838045.1 | Fun_5  |

|                                                |                |        |
|------------------------------------------------|----------------|--------|
|                                                | XP_007513564.1 | Pro_1  |
|                                                | XP_005784428.1 | Pro_2  |
|                                                | XP_009035520.1 | Pro_3  |
|                                                | XP_007508281.1 | Pro_4  |
|                                                | CDY68131.1     | Pla_1  |
|                                                | CDP02924.1     | Pla_2  |
|                                                | XP_006657848.1 | Pla_3  |
|                                                | XP_009387336.1 | Pla_4  |
|                                                | XP_007014012.1 | Pla_5  |
|                                                | WP_020863576.1 | Arc_1  |
|                                                | WP_010866657.1 | Arc_2  |
|                                                | WP_013481327.1 | Arc_3  |
|                                                | AIC15656.1     | Arc_4  |
|                                                | WP_022541922.1 | Arc_5  |
|                                                | BAL53572.1     | Eub_1  |
|                                                | WP_014559711.1 | Eub_2  |
|                                                | WP_015896494.1 | Eub_3  |
|                                                | WP_014203411.1 | Eub_4  |
|                                                | WP_001026493.1 | Eub_5  |
|                                                | WP_013764674.1 | Eub_6  |
|                                                | WP_014781258.1 | Eub_7  |
|                                                | WP_015845731.1 | Eub_8  |
|                                                | BAL58415.1     | Eub_9  |
|                                                | WP_027421227.1 | Eub_10 |
| maker-scaffold10066_size9005-snap-gene-0.15    | XP_003087098.1 | Met_1  |
|                                                | YP_002048979.1 | Pro_1  |
|                                                | XP_002536861.1 | Pla_1  |
|                                                | WP_011830907.1 | Eub_1  |
|                                                | WP_019559810.1 | Eub_2  |
|                                                | WP_029000600.1 | Eub_3  |
|                                                | WP_035035329.1 | Eub_4  |
|                                                | WP_009552958.1 | Eub_5  |
|                                                | WP_022981865.1 | Eub_6  |
|                                                | WP_012348488.1 | Eub_7  |
|                                                | WP_019375169.1 | Eub_8  |
|                                                | WP_037485812.1 | Eub_9  |
|                                                | WP_015012782.1 | Eub_10 |
| maker-scaffold642_size38736-augustus-gene-0.18 | XP_001943310.1 | Met_1  |
|                                                | EHJ63886.1     | Met_2  |
|                                                | XP_007345748.1 | Fun_1  |
|                                                | XP_003031610.1 | Fun_2  |
|                                                | XP_007347991.1 | Fun_3  |
|                                                | KDD75720.1     | Pro_1  |
|                                                | EJY78055.1     | Pro_2  |
|                                                | CDW90346.1     | Pro_3  |

|                                                |                |        |
|------------------------------------------------|----------------|--------|
|                                                | XP_009530917.1 | Pro_4  |
|                                                | XP_001579287.1 | Pro_5  |
|                                                | XP_004151369.1 | Pla_1  |
|                                                | XP_002537984.1 | Pla_2  |
|                                                | XP_001786589.1 | Pla_3  |
|                                                | XP_006663972.1 | Pla_4  |
|                                                | XP_008660435.1 | Pla_5  |
|                                                | AHF99242.1     | Arc_1  |
|                                                | WP_015789150.1 | Arc_2  |
|                                                | WP_006883391.1 | Arc_3  |
|                                                | WP_004971927.1 | Arc_4  |
|                                                | WP_009367567.1 | Arc_5  |
|                                                | WP_039451872.1 | Eub_1  |
|                                                | WP_013073700.1 | Eub_2  |
|                                                | WP_036725502.1 | Eub_3  |
|                                                | WP_020531984.1 | Eub_4  |
|                                                | WP_035684664.1 | Eub_5  |
|                                                | WP_015027914.1 | Eub_6  |
|                                                | WP_015311875.1 | Eub_7  |
|                                                | WP_036676929.1 | Eub_8  |
|                                                | WP_027125087.1 | Eub_9  |
|                                                | WP_034862220.1 | Eub_10 |
| maker-scaffold6505_size12078-augustus-gene-0.8 | XP_009052269.1 | Met_1  |
|                                                | XP_009052268.1 | Met_2  |
|                                                | XP_005111403.1 | Met_3  |
|                                                | EHJ77786.1     | Met_4  |
|                                                | XP_001655874.1 | Met_5  |
|                                                | ADG57801.1     | D_mel  |
|                                                | NP_510594.1    | C_ele  |
|                                                | EKC41751.1     | C_gig  |
|                                                | XP_002740991.1 | S_kow  |
|                                                | NP_001026459.1 | G_gal  |
|                                                | XP_001636998.1 | N_vec  |
|                                                | KDQ07936.1     | Fun_1  |
|                                                | KIJ63201.1     | Fun_2  |
|                                                | EPE10440.1     | Fun_3  |
|                                                | XP_001222477.1 | Fun_4  |
|                                                | CCO36641.1     | Fun_5  |
|                                                | KFA60784.1     | Fun_6  |
|                                                | XP_001823632.1 | Fun_7  |
|                                                | CEL55975.1     | Fun_8  |
|                                                | XP_002379056.1 | Fun_9  |
|                                                | KIK55609.1     | Fun_10 |
|                                                | XP_005774063.1 | Pro_1  |
|                                                | EFA85653.1     | Pro_2  |

|                                                        |                |        |
|--------------------------------------------------------|----------------|--------|
|                                                        | XP_002672231.1 | Pro_3  |
|                                                        | XP_002946174.1 | Pro_4  |
|                                                        | GAM22201.1     | Pro_5  |
|                                                        | XP_001753121.1 | Pla_1  |
|                                                        | XP_001774865.1 | Pla_2  |
|                                                        | XP_002986513.1 | Pla_3  |
|                                                        | NP_001142298.1 | Pla_4  |
|                                                        | XP_002994600.1 | Pla_5  |
|                                                        | WP_013898607.1 | Arc_1  |
|                                                        | AHG02284.1     | Arc_2  |
|                                                        | WP_006089530.1 | Arc_3  |
|                                                        | WP_008422764.1 | Arc_4  |
|                                                        | WP_008012272.1 | Arc_5  |
|                                                        | WP_028378880.1 | Eub_1  |
|                                                        | WP_027221611.1 | Eub_2  |
|                                                        | WP_019232553.1 | Eub_3  |
|                                                        | KFJ64412.1     | Eub_4  |
|                                                        | WP_038216498.1 | Eub_5  |
| snap_masked-scaffold7608_size10871-processed-gene-0.11 | CDW58870.1     | Met_1  |
|                                                        | ELT91826.1     | Met_2  |
|                                                        | XP_003693465.1 | Met_3  |
|                                                        | GAA58058.1     | Met_4  |
|                                                        | XP_001620267.1 | N_vec  |
|                                                        | YP_002049422.1 | Pro_1  |
|                                                        | AIF15384.1     | Arc_1  |
|                                                        | WP_014433065.1 | Eub_1  |
|                                                        | BAL58009.1     | Eub_2  |
|                                                        | WP_012874254.1 | Eub_3  |
|                                                        | WP_025748671.1 | Eub_4  |
|                                                        | WP_003869947.1 | Eub_5  |
|                                                        | WP_003867375.1 | Eub_6  |
|                                                        | WP_017815717.1 | Eub_7  |
|                                                        | WP_008476413.1 | Eub_8  |
|                                                        | WP_039043167.1 | Eub_9  |
|                                                        | WP_021619697.1 | Eub_10 |
| snap_masked-scaffold10_size447749-processed-gene-1.21  | XP_010081449.1 | Met_1  |
|                                                        | KFQ87123.1     | Met_2  |
|                                                        | KFV62490.1     | Met_3  |
|                                                        | XP_009908243.1 | Met_4  |
|                                                        | XP_008049841.1 | Met_5  |
|                                                        | NP_730250.1    | D_mel  |
|                                                        | NP_491165.2    | C_ele  |
|                                                        | EKC25512.1     | C_gig  |
|                                                        | XP_002741203.1 | S_kow  |
|                                                        | XP_004939779.1 | G_gal  |



|                                                        |                |        |
|--------------------------------------------------------|----------------|--------|
|                                                        | XP_001632616.1 | N_vec  |
|                                                        | EIE80123.1     | Fun_1  |
|                                                        | EPB90189.1     | Fun_2  |
|                                                        | KFH68520.1     | Fun_3  |
|                                                        | KIJ38474.1     | Fun_4  |
|                                                        | XP_003038563.1 | Fun_5  |
|                                                        | XP_004340807.1 | Pro_1  |
|                                                        | XP_005822221.1 | Pro_2  |
|                                                        | XP_002505472.1 | Pro_3  |
|                                                        | XP_003082962.1 | Pro_4  |
|                                                        | XP_003292084.1 | Pro_5  |
|                                                        | XP_010931245.1 | Pla_1  |
|                                                        | XP_008777200.1 | Pla_2  |
|                                                        | EPS71434.1     | Pla_3  |
|                                                        | EMT04659.1     | Pla_4  |
|                                                        | EEC79350.1     | Pla_5  |
|                                                        | WP_018035257.1 | Arc_1  |
|                                                        | AIF20054.1     | Arc_2  |
|                                                        | WP_018035131.1 | Arc_3  |
|                                                        | WP_011019246.1 | Arc_4  |
|                                                        | WP_015491691.1 | Arc_5  |
|                                                        | WP_037360570.1 | Eub_1  |
|                                                        | WP_037369803.1 | Eub_2  |
|                                                        | WP_037352617.1 | Eub_3  |
|                                                        | WP_033411345.1 | Eub_4  |
|                                                        | WP_035465307.1 | Eub_5  |
|                                                        | WP_039137089.1 | Eub_6  |
|                                                        | WP_014221908.1 | Eub_7  |
|                                                        | WP_028787176.1 | Eub_8  |
|                                                        | AHF16047.1     | Eub_9  |
|                                                        | WP_026902710.1 | Eub_10 |
| snap_masked-scaffold10028_size9034-processed-gene-0.14 | XP_005774972.1 | Pro_1  |
|                                                        | ABI13173.1     | Pro_2  |
|                                                        | XP_004334991.1 | Pro_3  |
|                                                        | XP_008611830.1 | Pro_4  |
|                                                        | XP_008228548.1 | Pla_1  |
|                                                        | ABK35747.1     | Pla_2  |
|                                                        | XP_007217721.1 | Pla_3  |
|                                                        | XP_008228546.1 | Pla_4  |
|                                                        | XP_008228549.1 | Pla_5  |
|                                                        | AJF62674.1     | Arc_1  |
|                                                        | WP_015283288.1 | Arc_2  |
|                                                        | WP_015019187.1 | Arc_3  |
|                                                        | WP_013467005.1 | Arc_4  |
|                                                        | AIY90136.1     | Arc_5  |

|                                                       |                |        |
|-------------------------------------------------------|----------------|--------|
|                                                       | WP_038663484.1 | Eub_1  |
|                                                       | WP_037534949.1 | Eub_2  |
|                                                       | WP_017977922.1 | Eub_3  |
|                                                       | GAM01630.1     | Eub_4  |
|                                                       | WP_007403352.1 | Eub_5  |
|                                                       | WP_039096965.1 | Eub_6  |
|                                                       | WP_019371167.1 | Eub_7  |
|                                                       | WP_023837964.1 | Eub_8  |
|                                                       | WP_033926094.1 | Eub_9  |
|                                                       | WP_026090772.1 | Eub_10 |
| snap_masked-scaffold10032_size9031-processed-gene-0.5 | XP_006572683.1 | Met_1  |
|                                                       | XP_003384413.1 | Met_2  |
|                                                       | XP_008177878.1 | Met_3  |
|                                                       | ELU16414.1     | Met_4  |
|                                                       | XP_006129701.1 | Met_5  |
|                                                       | NP_788477.1    | D_mel  |
|                                                       | EKC20330.1     | C_gig  |
|                                                       | XP_006813535.1 | S_kow  |
|                                                       | XP_001640548.1 | N_vec  |
|                                                       | XP_002616817.1 | Fun_1  |
|                                                       | XP_008038010.1 | Fun_2  |
|                                                       | CCG82215.1     | Fun_3  |
|                                                       | CDH53741.1     | Fun_4  |
|                                                       | CDS02868.1     | Fun_5  |
|                                                       | XP_004258806.1 | Pro_1  |
|                                                       | XP_001429450.1 | Pro_2  |
|                                                       | XP_637469.1    | Pro_3  |
|                                                       | XP_001432773.1 | Pro_4  |
|                                                       | CCI48117.1     | Pro_5  |
|                                                       | XP_001776978.1 | Pla_1  |
|                                                       | XP_010264162.1 | Pla_2  |
|                                                       | XP_004506491.1 | Pla_3  |
|                                                       | XP_002319326.2 | Pla_4  |
|                                                       | XP_010518148.1 | Pla_5  |
|                                                       | WP_011009538.1 | Arc_1  |
|                                                       | WP_011900532.1 | Arc_2  |
|                                                       | WP_021062030.1 | Arc_3  |
|                                                       | WP_009376705.1 | Arc_4  |
|                                                       | WP_020445114.1 | Arc_5  |
|                                                       | WP_008504811.1 | Eub_1  |
|                                                       | WP_014166640.1 | Eub_2  |
|                                                       | WP_019988798.1 | Eub_3  |
|                                                       | WP_021191018.1 | Eub_4  |
|                                                       | WP_011585908.1 | Eub_5  |
|                                                       | WP_020594901.1 | Eub_6  |

|                                                           |                |        |
|-----------------------------------------------------------|----------------|--------|
|                                                           | WP_028978473.1 | Eub_7  |
|                                                           | WP_013927919.1 | Eub_8  |
|                                                           | GAL86272.1     | Eub_9  |
|                                                           | WP_022831195.1 | Eub_10 |
| snap_masked-scaffold10_size447749-processed-gene-3.47     | XP_312302.3    | Met_1  |
|                                                           | XP_001865713.1 | Met_2  |
|                                                           | XP_011197091.1 | Met_3  |
|                                                           | CEF66560.1     | Met_4  |
|                                                           | ENN77452.1     | Met_5  |
|                                                           | NP_732486.2    | D_mel  |
|                                                           | NP_493371.1    | C_ele  |
|                                                           | EKC36313.1     | C_gig  |
|                                                           | NP_001264720.1 | G_gal  |
|                                                           | XP_001633029.1 | N_vec  |
|                                                           | XP_006683531.1 | Fun_1  |
|                                                           | GAA84667.1     | Fun_2  |
|                                                           | XP_003719896.1 | Fun_3  |
|                                                           | AAF70241.1     | Fun_4  |
|                                                           | XP_001905685.1 | Fun_5  |
|                                                           | EMH76643.1     | Pro_1  |
|                                                           | EPY29093.1     | Pro_2  |
|                                                           | XP_005794540.1 | Pro_3  |
|                                                           | XP_003875179.1 | Pro_4  |
|                                                           | XP_002960024.1 | Pro_5  |
|                                                           | BAJ96758.1     | Pla_1  |
|                                                           | XP_002540035.1 | Pla_2  |
|                                                           | XP_002539462.1 | Pla_3  |
|                                                           | KEH15495.1     | Pla_4  |
|                                                           | WP_016358292.1 | Arc_1  |
|                                                           | WP_040681982.1 | Arc_2  |
|                                                           | WP_012021384.1 | Arc_3  |
|                                                           | WP_013775700.1 | Arc_4  |
|                                                           | WP_015581549.1 | Arc_5  |
|                                                           | WP_022830972.1 | Eub_1  |
|                                                           | WP_015028079.1 | Eub_2  |
|                                                           | WP_028667651.1 | Eub_3  |
|                                                           | WP_034257606.1 | Eub_4  |
|                                                           | WP_025864949.1 | Eub_5  |
|                                                           | WP_020601462.1 | Eub_6  |
|                                                           | WP_013444421.1 | Eub_7  |
|                                                           | WP_015329810.1 | Eub_8  |
|                                                           | WP_018620330.1 | Eub_9  |
|                                                           | WP_028730375.1 | Eub_10 |
| augustus_masked-scaffold15023_size6066-processed-gene-0.3 | ELT98248.1     | Met_1  |
|                                                           | XP_009288522.1 | Met_2  |

|                                             |                |        |
|---------------------------------------------|----------------|--------|
|                                             | CDW59419.1     | Met_3  |
|                                             | KII74601.1     | Met_4  |
|                                             | XP_003390337.1 | Met_5  |
|                                             | XP_001620472.1 | N_vec  |
|                                             | KGQ13221.1     | Fun_1  |
|                                             | KGQ13835.1     | Fun_2  |
|                                             | XP_007406412.1 | Fun_3  |
|                                             | XP_003334153.2 | Fun_4  |
|                                             | KFY99255.1     | Fun_5  |
|                                             | EMH77043.1     | Pro_1  |
|                                             | GAM19526.1     | Pro_2  |
|                                             | NP_045215.1    | Pro_3  |
|                                             | EAR81937.2     | Pro_4  |
|                                             | XP_001460950.1 | Pro_5  |
|                                             | XP_002539997.1 | Pla_1  |
|                                             | XP_002536709.1 | Pla_2  |
|                                             | XP_001786863.1 | Pla_3  |
|                                             | XP_002536685.1 | Pla_4  |
|                                             | XP_001786672.1 | Pla_5  |
|                                             | AIA86359.1     | Arc_1  |
|                                             | WP_008321096.1 | Arc_2  |
|                                             | WP_013906266.1 | Arc_3  |
|                                             | AHZ21692.1     | Arc_4  |
|                                             | AIU70933.1     | Arc_5  |
|                                             | WP_009855471.1 | Eub_1  |
|                                             | WP_014426505.1 | Eub_2  |
|                                             | WP_009549535.1 | Eub_3  |
|                                             | WP_026096412.1 | Eub_4  |
|                                             | WP_026354497.1 | Eub_5  |
|                                             | WP_038494969.1 | Eub_6  |
|                                             | WP_036214541.1 | Eub_7  |
|                                             | WP_009667571.1 | Eub_8  |
|                                             | WP_036237415.1 | Eub_9  |
|                                             | WP_038487188.1 | Eub_10 |
| maker-scaffold3763_size17107-snap-gene-0.14 | EHA22259.1     | Fun_1  |
|                                             | EMD32372.1     | Fun_2  |
|                                             | KEP51556.1     | Fun_3  |
|                                             | KEP51555.1     | Fun_4  |
|                                             | KIK36698.1     | Fun_5  |
|                                             | XP_001261871.1 | Fun_6  |
|                                             | KDR79180.1     | Fun_7  |
|                                             | XP_009551738.1 | Fun_8  |
|                                             | EPS99280.1     | Fun_9  |
|                                             | XP_005651358.1 | Pro_1  |
|                                             | XP_002894880.1 | Pro_2  |

|                                                        |                |       |
|--------------------------------------------------------|----------------|-------|
|                                                        | XP_001778913.1 | Pla_1 |
|                                                        | XP_002536324.1 | Pla_2 |
|                                                        | EMT11668.1     | Pla_3 |
|                                                        | WP_014763218.1 | Eub_1 |
|                                                        | WP_008878470.1 | Eub_2 |
|                                                        | KIG17217.1     | Eub_3 |
|                                                        | WP_006727887.1 | Eub_4 |
|                                                        | WP_035072033.1 | Eub_5 |
| snap_masked-scaffold8578_size10052-processed-gene-0.10 | ETN86856.1     | Met_1 |
|                                                        | XP_003390865.1 | Met_2 |
|                                                        | XP_010724977.1 | Met_3 |
|                                                        | XP_007244265.1 | Met_4 |
|                                                        | XP_010884639.1 | Met_5 |
|                                                        | NP_612044.1    | D_mel |
|                                                        | NP_001021052.1 | C_ele |
|                                                        | EKC25730.1     | C_gig |
|                                                        | XP_002741389.1 | S_kow |
|                                                        | XP_416988.1    | G_gal |
|                                                        | XP_001618871.1 | N_vec |
|                                                        | XP_006683287.1 | Fun_1 |
|                                                        | XP_006683290.1 | Fun_2 |
|                                                        | XP_002650527.1 | Fun_3 |
|                                                        | CDH53780.1     | Fun_4 |
|                                                        | ERZ94801.1     | Fun_5 |
|                                                        | XP_004184621.1 | Pro_1 |
|                                                        | XP_641641.1    | Pro_2 |
|                                                        | CBK22816.2     | Pro_3 |
|                                                        | GAM23706.1     | Pro_4 |
|                                                        | XP_002293037.1 | Pro_5 |
|                                                        | XP_002540080.1 | Pla_1 |
|                                                        | XP_002539007.1 | Pla_2 |
|                                                        | XP_010109352.1 | Pla_3 |
|                                                        | XP_006484833.1 | Pla_4 |
|                                                        | XP_007215006.1 | Pla_5 |
|                                                        | AIF05098.1     | Arc_1 |
|                                                        | BAP60490.1     | Arc_2 |
|                                                        | WP_011972221.1 | Arc_3 |
|                                                        | WP_010870574.1 | Arc_4 |
|                                                        | WP_007043598.1 | Arc_5 |
|                                                        | WP_040546614.1 | Eub_1 |
|                                                        | WP_020035461.1 | Eub_2 |
|                                                        | ADI22501.1     | Eub_3 |
|                                                        | ADE54680.1     | Eub_4 |
|                                                        | WP_040900913.1 | Eub_5 |
|                                                        | WP_015049434.1 | Eub_6 |

|                                            |                |        |
|--------------------------------------------|----------------|--------|
|                                            | WP_009851810.1 | Eub_7  |
|                                            | WP_018294071.1 | Eub_8  |
|                                            | WP_027985653.1 | Eub_9  |
|                                            | WP_008516497.1 | Eub_10 |
| maker-scaffold749_size36498-snap-gene-0.17 | AGR65713.1     | Met_1  |
|                                            | XP_002435205.1 | Met_2  |
|                                            | XP_002118601.1 | Met_3  |
|                                            | XP_008486101.1 | Met_4  |
|                                            | ELT91828.1     | Met_5  |
|                                            | NP_649139.1    | D_mel  |
|                                            | NP_741194.1    | C_ele  |
|                                            | EKC25219.1     | C_gig  |
|                                            | XP_006819552.1 | S_kow  |
|                                            | NP_001006567.1 | G_gal  |
|                                            | XP_001640743.1 | N_vec  |
|                                            | EPY49588.1     | Fun_1  |
|                                            | EPX75052.1     | Fun_2  |
|                                            | KGK38776.1     | Fun_3  |
|                                            | XP_002553905.1 | Fun_4  |
|                                            | XP_002777738.1 | Fun_5  |
|                                            | XP_002140155.1 | Pro_1  |
|                                            | XP_002179030.1 | Pro_2  |
|                                            | XP_002285941.1 | Pro_3  |
|                                            | XP_001293713.1 | Pro_4  |
|                                            | XP_009034222.1 | Pro_5  |
|                                            | XP_002540194.1 | Pla_1  |
|                                            | KHG27573.1     | Pla_2  |
|                                            | XP_004146302.1 | Pla_3  |
|                                            | XP_009120277.1 | Pla_4  |
|                                            | XP_004163726.1 | Pla_5  |
|                                            | WP_012956882.1 | Arc_1  |
|                                            | AIF83870.1     | Arc_2  |
|                                            | AIC14683.1     | Arc_3  |
|                                            | WP_014963178.1 | Arc_4  |
|                                            | WP_017981048.1 | Arc_5  |
|                                            | WP_009577742.1 | Eub_1  |
|                                            | WP_039751929.1 | Eub_2  |
|                                            | WP_013453160.1 | Eub_3  |
|                                            | WP_038033009.1 | Eub_4  |
|                                            | WP_017731758.1 | Eub_5  |
|                                            | WP_035726303.1 | Eub_6  |
|                                            | WP_026898535.1 | Eub_7  |
|                                            | GAL84230.1     | Eub_8  |
|                                            | WP_037576558.1 | Eub_9  |
|                                            | WP_040006875.1 | Eub_10 |

# Genomic PCR – associated information

| Genl. reference | Gene 1                                                     | Gene 1 best hit              | Gene 1 HGT index score | Gene 1 Putative annotation                                            | Gene 1 BLAST % ID | Gene 1 product length (AA) | Gene 1 top hit length (AA) | Gene 1 domain | Gene 1 domain link        | Gene 2                                                     | Gene 2 best hit              |
|-----------------|------------------------------------------------------------|------------------------------|------------------------|-----------------------------------------------------------------------|-------------------|----------------------------|----------------------------|---------------|---------------------------|------------------------------------------------------------|------------------------------|
| 41              | maker-scalfold1034_size31628-processed-gene-0.19           | g51446019refWP_021044668.1   | 25                     | ABC-type branched-chain amino acid transport system, ATPase component | 53.04             | 482                        | 252                        | ABC           | g0262346refWP_025090671.1 | maker-scalfold1034_size31628-processed-gene-0.19           | g51446019refWP_021044668.1   |
| 42              | maker-scalfold4690_size14997-processed-gene-0.16           | g50486567refWP_010352778.1   | 108                    | exonuclease III                                                       | 69.69             | 499                        | 261                        | Archaeb       | g0262346refWP_025090671.1 | maker-scalfold4690_size14997-processed-gene-0.16           | g50486567refWP_010352778.1   |
| 43              | maker-scalfold6957_size11554-processed-gene-0.14           | g503032157refWP_013666617.1  | 142                    | hypothetical protein                                                  | 43.37             | 211                        | 219                        | Archaeb       | g0262346refWP_025090671.1 | maker-scalfold6957_size11554-processed-gene-0.14           | g503032157refWP_013666617.1  |
| 44              | maker-scalfold7284_size11211-processed-gene-0.10           | g549917441refWP_018740981.1  | 74                     | hypothetical protein                                                  | 28.87             | 412                        | 216                        | Archaeb       | g0262346refWP_025090671.1 | maker-scalfold7284_size11211-processed-gene-0.10           | g549917441refWP_018740981.1  |
| 45              | maker-scalfold1047_size2086347-processed-gene-0.78         | g526853047refWP_020663177.1  | 108                    | hydroxylase                                                           | 55.27             | 511                        | 248                        | Archaeb       | g0262346refWP_025090671.1 | maker-scalfold1047_size2086347-processed-gene-0.78         | g526853047refWP_020663177.1  |
| 46              | maker-scalfold1000_size20066-processed-gene-0.59           | g5095484122gEXX71234.1       | 189                    | hypothetical protein Ref: 080310                                      | 28.59             | 869                        | 737                        | Fungi         | g0262346refWP_025090671.1 | maker-scalfold1000_size20066-processed-gene-0.59           | g5095484122gEXX71234.1       |
| 47              | augustus masked-scalfold1002_size2014-processed-gene-0.4   | g57547149refWP_006657044.1   | 211                    | hypothetical protein BAT1EDRAFT_8747                                  | 42.86             | 511                        | 445                        | Fungi         | g0262346refWP_025090671.1 | augustus masked-scalfold1002_size2014-processed-gene-0.4   | g57547149refWP_006657044.1   |
| 48              | maker-scalfold1011_size89954-processed-gene-0.1            | g5499103713gEXX79024.1       | 199                    | hypothetical protein Ref: 090241                                      | 28.21             | 599                        | 219                        | Fungi         | g0262346refWP_025090671.1 | maker-scalfold1011_size89954-processed-gene-0.1            | g5499103713gEXX79024.1       |
| 49              | maker-scalfold104_size4685-augustus-gene-0.25              | g50954760refWP_006657044.1   | 242                    | hypothetical protein Ref: 114100                                      | 33.27             | 824                        | 500                        | Fungi         | g0262346refWP_025090671.1 | maker-scalfold104_size4685-augustus-gene-0.25              | g50954760refWP_006657044.1   |
| 50              | maker-scalfold1055_size34456-augustus-gene-0.19            | g5170107261refWP_001848441.1 | 381                    | delta 9-fatty acid desaturase protein                                 | 65.8421           | 432                        | 465                        | Fungi         | g0262346refWP_025090671.1 | maker-scalfold1055_size34456-augustus-gene-0.19            | g5170107261refWP_001848441.1 |
| 51              | maker-scalfold10741_size634-augustus-gene-0.6              | g534097461gEXX18088.1        | 44                     | COPII coat assembly protein SEC16                                     | 33.12             | 943                        | 199                        | Fungi         | g0262346refWP_025090671.1 | maker-scalfold10741_size634-augustus-gene-0.6              | g534097461gEXX18088.1        |
| 52              | maker-scalfold1092_size39006-processed-gene-0.25           | g514697461gEXX18088.1        | 44                     | COPII coat assembly protein SEC16                                     | 33.33             | 940                        | 199                        | Fungi         | g0262346refWP_025090671.1 | maker-scalfold1092_size39006-processed-gene-0.25           | g514697461gEXX18088.1        |
| 53              | maker-scalfold1218_size29458-augustus-gene-0.15            | g5296411889refWP_002835661.1 | 605                    | hypothetical protein                                                  | 56.21             | 1143                       | 571                        | Fungi         | g0262346refWP_025090671.1 | maker-scalfold1218_size29458-augustus-gene-0.15            | g5296411889refWP_002835661.1 |
| 54              | map maker-scalfold1229_size2934-processed-gene-0.12        | g52059139gEXX05599.1         | 130                    | including n-acylase of ribosomal protein                              | 37.13             | 1472                       | 211                        | Fungi         | g0262346refWP_025090671.1 | map maker-scalfold1229_size2934-processed-gene-0.12        | g52059139gEXX05599.1         |
| 55              | augustus masked-scalfold1669_size2541-processed-gene-0.3   | g52194522gEXX05602.1         | 303                    | hypothetical protein mv_R860                                          | 39.92             | 567                        | 558                        | Viruses       | g0262346refWP_025090671.1 | augustus masked-scalfold1669_size2541-processed-gene-0.3   | g52194522gEXX05602.1         |
| 56              | map maker-scalfold2358_size21708-processed-gene-0.4        | g537194522gEXX05602.1        | 326                    | hypothetical protein mv_R860                                          | 39.75             | 1462                       | 554                        | Viruses       | g0262346refWP_025090671.1 | map maker-scalfold2358_size21708-processed-gene-0.4        | g537194522gEXX05602.1        |
| 57              | maker-scalfold301_size53378-augustus-gene-0.31             | g537194522gEXX05602.1        | 326                    | hypothetical protein mv_R860                                          | 38.4              | 548                        | 554                        | Viruses       | g0262346refWP_025090671.1 | maker-scalfold301_size53378-augustus-gene-0.31             | g537194522gEXX05602.1        |
| 58              | maker-scalfold3259_size18493-processed-gene-0.15           | g537194522gEXX05602.1        | 326                    | hypothetical protein mv_R860                                          | 38.26             | 557                        | 554                        | Viruses       | g0262346refWP_025090671.1 | maker-scalfold3259_size18493-processed-gene-0.15           | g537194522gEXX05602.1        |
| 59              | maker-scalfold5591_size22279-augustus-gene-0.10            | g537194522gEXX05602.1        | 326                    | hypothetical protein mv_R860                                          | 36.98             | 620                        | 554                        | Viruses       | g0262346refWP_025090671.1 | maker-scalfold5591_size22279-augustus-gene-0.10            | g537194522gEXX05602.1        |
| 60              | maker-scalfold5737_size10937-processed-gene-0.9            | g538259944refWP_009001021.1  | 66                     | collagen triple helix repeat protein                                  | 64.46             | 349                        | 709                        | Viruses       | g0262346refWP_025090671.1 | maker-scalfold5737_size10937-processed-gene-0.9            | g538259944refWP_009001021.1  |
| 61              | augustus masked-scalfold847_size3439-processed-gene-0.4    | g537194522gEXX05602.1        | 349                    | hypothetical protein mv_R860                                          | 38.86             | 567                        | 554                        | Viruses       | g0262346refWP_025090671.1 | augustus masked-scalfold847_size3439-processed-gene-0.4    | g537194522gEXX05602.1        |
| 62              | maker-scalfold10_size47749-processed-gene-0.25             | g53043359refWP_013688259.1   | 66                     | hydroxylase                                                           | 65.31             | 188                        | 98                         | Bacteroidetes | g0262346refWP_025090671.1 | maker-scalfold10_size47749-processed-gene-0.25             | g53043359refWP_013688259.1   |
| 63              | maker-scalfold10072_size9001-processed-gene-0.11           | g5389614179gEXX185499.1      | 910                    | hypothetical protein                                                  | 64.17             | 982                        | 735                        | Bacteria      | g0262346refWP_025090671.1 | maker-scalfold10072_size9001-processed-gene-0.11           | g5389614179gEXX185499.1      |
| 64              | maker-scalfold16610_size5253-processed-gene-0.7            | g550462602refWP_028292962.1  | 491                    | hypothetical protein                                                  | 88.11             | 1020                       | 285                        | Bacteria      | g0262346refWP_025090671.1 | maker-scalfold16610_size5253-processed-gene-0.7            | g550462602refWP_028292962.1  |
| 65              | map maker-scalfold161703_size521-processed-gene-0.5        | g50540911refWP_015962333.1   | 845                    | chromosomal replication initiator protein DnaA                        | 68.05             | 511                        | 506                        | Bacteria      | g0262346refWP_025090671.1 | map maker-scalfold161703_size521-processed-gene-0.5        | g50540911refWP_015962333.1   |
| 66              | augustus masked-scalfold16703_size2513-processed-gene-0.3  | g51821362refWP_019403833.1   | 53                     | enoyl-CoA hydratase                                                   | 80.65             | 125                        | 257                        | Bacteria      | g0262346refWP_025090671.1 | augustus masked-scalfold16703_size2513-processed-gene-0.3  | g51821362refWP_019403833.1   |
| 67              | maker-scalfold10066_size9005-processed-gene-0.15           | g55001362refWP_011830907.1   | 520                    | HncA family transcriptional regulator                                 | 71.87             | 449                        | 342                        | Bacteria      | g0262346refWP_025090671.1 | maker-scalfold10066_size9005-processed-gene-0.15           | g55001362refWP_011830907.1   |
| 68              | maker-scalfold714_size1728-augustus-gene-0.12              | g529334553refWP_001169713.1  | 207                    | acylglycerolcholine transferase                                       | 37.83             | 388                        | 388                        | Fungi         | g0262346refWP_025090671.1 | maker-scalfold714_size1728-augustus-gene-0.12              | g529334553refWP_001169713.1  |
| 69              | maker-scalfold5591_size22279-augustus-gene-0.10            | g529334553refWP_001169713.1  | 207                    | acylglycerolcholine transferase                                       | 37.83             | 388                        | 388                        | Fungi         | g0262346refWP_025090671.1 | maker-scalfold5591_size22279-augustus-gene-0.10            | g529334553refWP_001169713.1  |
| 70              | map maker-scalfold10029_size9013-processed-gene-0.14       | g501209330gEXXZP5172.1       | 362                    | hypothetical protein SEL_MORAFAT_96185                                | 76.17             | 219                        | 288                        | Bacteria      | g0262346refWP_025090671.1 | map maker-scalfold10029_size9013-processed-gene-0.14       | g501209330gEXXZP5172.1       |
| 71              | maker-scalfold505_size12078-augustus-gene-0.8              | g51880083refWP_001753211.1   | 319                    | predicted protein                                                     | 40.61             | 573                        | 581                        | Fungi         | g0262346refWP_025090671.1 | maker-scalfold505_size12078-augustus-gene-0.8              | g51880083refWP_001753211.1   |
| 72              | maker-scalfold1003_size47749-processed-gene-0.5            | g53043359refWP_013688259.1   | 66                     | hydroxylase                                                           | 65.31             | 188                        | 98                         | Bacteroidetes | g0262346refWP_025090671.1 | maker-scalfold1003_size47749-processed-gene-0.5            | g53043359refWP_013688259.1   |
| 73              | map maker-scalfold10_size47749-processed-gene-0.25         | g53120292refWP_028300749.1   | 359                    | endo-1,4-beta-xylosylase                                              | 71.04             | 205                        | 295                        | Bacteria      | g0262346refWP_025090671.1 | map maker-scalfold10_size47749-processed-gene-0.25         | g53120292refWP_028300749.1   |
| 74              | map maker-scalfold878_size37947-processed-gene-0.18        | g51531077refWP_016848406.1   | 235                    | omega-ACP reductase                                                   | 67.77             | 273                        | 275                        | Bacteria      | g0262346refWP_025090671.1 | map maker-scalfold878_size37947-processed-gene-0.18        | g51531077refWP_016848406.1   |
| 75              | map maker-scalfold40102_size903-processed-gene-0.12        | g54986986refWP_010403119.1   | 478                    | YnfL family transcriptional regulator                                 | 84.8              | 299                        | 299                        | Bacteria      | g0262346refWP_025090671.1 | map maker-scalfold40102_size903-processed-gene-0.12        | g54986986refWP_010403119.1   |
| 76              | maker-scalfold12066_size780-processed-gene-0.3             | g5189252refWP_020848179.1    | 232                    | lysine aminopeptidase                                                 | 69.12             | 274                        | 274                        | Bacteria      | g0262346refWP_025090671.1 | maker-scalfold12066_size780-processed-gene-0.3             | g5189252refWP_020848179.1    |
| 77              | maker-scalfold2326_size18566-augustus-gene-0.24            | g530276252refWP_002866650.1  | 265                    | hypothetical protein SEL_MORAFAT_266960                               | 45.95             | 382                        | 418                        | Fungi         | g0262346refWP_025090671.1 | maker-scalfold2326_size18566-augustus-gene-0.24            | g530276252refWP_002866650.1  |
| 78              | maker-scalfold1707_size25220-processed-gene-0.10           | g512555456gEXXZ001251.1      | 409                    | hypothetical protein Df_2158                                          | 39.32             | 844                        | 384                        | Fungi         | g0262346refWP_025090671.1 | maker-scalfold1707_size25220-processed-gene-0.10           | g512555456gEXXZ001251.1      |
| 79              | maker-scalfold1372_size27931-augustus-gene-0.18            | g514594753refWP_018499212.1  | 167                    | Trf family transcriptional regulator                                  | 49.67             | 318                        | 285                        | Bacteria      | g0262346refWP_025090671.1 | maker-scalfold1372_size27931-augustus-gene-0.18            | g514594753refWP_018499212.1  |
| 80              | map maker-scalfold21250_size389-processed-gene-0.4         | g50114352refWP_012191727.1   | 147                    | Ynf family transcriptional regulator                                  | 46.07             | 318                        | 195                        | Bacteria      | g0262346refWP_025090671.1 | map maker-scalfold21250_size389-processed-gene-0.4         | g50114352refWP_012191727.1   |
| 81              | maker-scalfold12726_size10414-processed-gene-0.15          | g527718123refWP_014482632.1  | 277                    | MuL1/TSXP_C15_mnase ABC transporter ATP-binding protein               | 68.59             | 511                        | 506                        | Bacteria      | g0262346refWP_025090671.1 | maker-scalfold12726_size10414-processed-gene-0.15          | g527718123refWP_014482632.1  |
| 82              | map maker-scalfold48578_size10052-processed-gene-0.10      | g549465502refWP_007412967.1  | 583                    | polyaccharide biosynthesis protein CapD                               | 51.27             | 626                        | 674                        | Bacteria      | g0262346refWP_025090671.1 | map maker-scalfold48578_size10052-processed-gene-0.10      | g549465502refWP_007412967.1  |
| 83              | maker-scalfold22270_size2748-processed-gene-0.5            | g544671101refWP_000808275.1  | 522                    | salI/ate ABC transporter ATP-binding protein                          | 60.32             | 608                        | 636                        | Bacteria      | g0262346refWP_025090671.1 | maker-scalfold22270_size2748-processed-gene-0.5            | g544671101refWP_000808275.1  |
| 84              | maker-scalfold486_size12099-processed-gene-0.18            | g549287551refWP_006018912.1  | 296                    | MuL1/TSXP_C15_hypothetical protein                                    | 71.83             | 520                        | 338                        | Bacteria      | g0262346refWP_025090671.1 | maker-scalfold486_size12099-processed-gene-0.18            | g549287551refWP_006018912.1  |
| 85              | maker-scalfold1216_size27123-processed-gene-0.15           | g51821362refWP_019403833.1   | 53                     | enoyl-CoA hydratase                                                   | 81.48             | 125                        | 125                        | Bacteria      | g0262346refWP_025090671.1 | maker-scalfold1216_size27123-processed-gene-0.15           | g51821362refWP_019403833.1   |
| 86              | map maker-scalfold1455_size271423-processed-gene-0.8       | g51745637refWP_018627148.1   | 458                    | glutamy-tRNA synthetase                                               | 66.52             | 529                        | 509                        | Bacteria      | g0262346refWP_025090671.1 | map maker-scalfold1455_size271423-processed-gene-0.8       | g51745637refWP_018627148.1   |
| 87              | map maker-scalfold126_size1740-processed-gene-0.47         | g50267567refWP_012191419.1   | 199                    | phosco-6-phosphate 1-dehydrogenase                                    | 53.93             | 567                        | 486                        | Bacteria      | g0262346refWP_025090671.1 | map maker-scalfold126_size1740-processed-gene-0.47         | g50267567refWP_012191419.1   |
| 88              | maker-scalfold1068_size10433-processed-gene-0.1            | g529334553refWP_001169713.1  | 207                    | acylglycerolcholine transferase                                       | 37.83             | 388                        | 388                        | Fungi         | g0262346refWP_025090671.1 | maker-scalfold1068_size10433-processed-gene-0.1            | g529334553refWP_001169713.1  |
| 89              | augustus masked-scalfold10029_size9013-processed-gene-0.14 | g501209330gEXXZP5172.1       | 362                    | hypothetical protein SEL_MORAFAT_96185                                | 76.17             | 219                        | 288                        | Bacteria      | g0262346refWP_025090671.1 | augustus masked-scalfold10029_size9013-processed-gene-0.14 | g501209330gEXXZP5172.1       |
| 90              | maker-scalfold49976_size29233-processed-gene-0.1           | g517548072refWP_006679675.1  | 115                    | myosin heavy chain variant 1                                          | 49.08             | 469                        | 565                        | Fungi         | g0262346refWP_025090671.1 | maker-scalfold49976_size29233-processed-gene-0.1           | g517548072refWP_006679675.1  |
| 91              | maker-scalfold1970_size20333-augustus-gene-0.15            | g517548072refWP_006679675.1  | 115                    | myosin heavy chain variant 1                                          | 49.08             | 469                        | 565                        | Fungi         | g0262346refWP_025090671.1 | maker-scalfold1970_size20333-augustus-gene-0.15            | g517548072refWP_006679675.1  |
| 92              | maker-scalfold1455_size271423-processed-gene-0.60          | g51745637refWP_018627148.1   | 458                    | glutamy-tRNA synthetase                                               | 66.52             | 529                        | 509                        | Bacteria      | g0262346refWP_025090671.1 | maker-scalfold1455_size271423-processed-gene-0.60          | g51745637refWP_018627148.1   |
| 93              | maker-scalfold74_size15697-processed-gene-0.80             | g517191819gEXXZT4744.1       | 116                    | alpha/beta hydrolase                                                  | 53.85             | 286                        | 286                        | Bacteria      | g0262346refWP_025090671.1 | maker-scalfold74_size15697-processed-gene-0.80             | g517191819gEXXZT4744.1       |
| 94              | maker-scalfold3315_size18230-processed-gene-0.10           | g5159401581refWP_012134317.1 | 183                    | cytine hydratase                                                      | 65.38             | 267                        | 156                        | Bacteria      | g0262346refWP_025090671.1 | maker-scalfold3315_size18230-processed-gene-0.10           | g5159401581refWP_012134317.1 |
| 95              | maker-scalfold5060_size27859-augustus-gene-0.17            | g53043359refWP_013688259.1   | 66                     | hydroxylase                                                           | 65.31             | 188                        | 98                         | Bacteroidetes | g0262346refWP_025090671.1 | maker-scalfold5060_size27859-augustus-gene-0.17            | g53043359refWP_013688259.1   |
| 96              | maker-scalfold2709_size20194-processed-gene-0.9            | g53043359refWP_013688259.1   | 66                     | hydroxylase                                                           | 65.31             | 188                        | 98                         | Bacteroidetes | g0262346refWP_025090671.1 | maker-scalfold2709_size20194-processed-gene-0.9            | g53043359refWP_013688259.1   |



| Gene 2 product length (AA) | Gene 2 best hit length (AA) | Gene 2 domain | Gene 2 kingdom | Gene 2 Phylum   | Gene 1 START | Gene 1 END | Gene 2 Start | Gene 2 END             | Forward Primer Sequence | Reverse Primer Sequence | Reverse Primer Start | Reverse Primer End | Predicted amplicon length | Gene 1 Intron Count |
|----------------------------|-----------------------------|---------------|----------------|-----------------|--------------|------------|--------------|------------------------|-------------------------|-------------------------|----------------------|--------------------|---------------------------|---------------------|
| 407                        | 394                         | #N/A          | #N/A           | #N/A            | 979          | 979        | 979          | 2202                   | ATGGGAAAGAC             | ATGGGAAAGAC             | 2002                 | 2002               | 3163                      | 1                   |
| 242                        | 242                         | Bacteria      | #N/A           | #N/A            | 6885         | 6952       | 6885         | 8820                   | ATGGCACTCCGGTGAAC       | ATGGCACTCCGGTGAAC       | 5884                 | 5884               | 6269                      | 2                   |
| 185                        | 139                         | Bacteria      | #N/A           | #N/A            | 5863         | 3871       | 5863         | 4599                   | ACCGACCAAAAGTCAAC       | ACCGACCAAAAGTCAAC       | 4404                 | 4404               | 5633                      | 1                   |
| 250                        | 250                         | Eukaryota     | Metazoa        | Chordata        | 71           | 2666       | 3388         | 8533                   | CCACCATTCGACACTCTT      | CCACCATTCGACACTCTT      | 2472                 | 2472               | 3490                      | 10                  |
| 281                        | 262                         | Bacteria      | #N/A           | #N/A            | 2538         | 2538       | 2538         | 878                    | ATGCGTCAAGCC            | ATGCGTCAAGCC            | 802                  | 802                | 1098                      | 0                   |
| 685                        | 750                         | Eukaryota     | Metazoa        | Chordata        | 695231       | 77997      | 62373        | 67402                  | GATCTTACGGTACGGCTGAG    | GATCTTACGGTACGGCTGAG    | 67307                | 67307              | 69658                     | 2452                |
| 685                        | 513                         | Eukaryota     | Metazoa        | Chordata        | 20996        | 24776      | 13432        | 18629                  | ATGCCAAACCTACCTAGAC     | ATGCCAAACCTACCTAGAC     | 1862                 | 1862               | 5333                      | 9                   |
| 701                        | 970                         | Eukaryota     | Metazoa        | Chordata        | 700423       | 700423     | 700423       | 178                    | ATGAGCACTGACGATATTG     | ATGAGCACTGACGATATTG     | 5028                 | 5028               | 4379                      | 1168                |
| 694                        | 663                         | Eukaryota     | Metazoa        | Chordata        | 55904        | 61118      | 50678        | 54487                  | TCCATATCCGGTAAAGTGTTC   | TCCATATCCGGTAAAGTGTTC   | 54300                | 54300              | 56041                     | 1742                |
| 638                        | 406                         | Eukaryota     | Metazoa        | Arthropoda      | 5378         | 8390       | 480          | 5914                   | CTTGGAGGAGCGTAGAGAAG    | CTTGGAGGAGCGTAGAGAAG    | 3830                 | 3830               | 4741                      | 3                   |
| 186                        | 883                         | Eukaryota     | Metazoa        | Platyhelminthes | 381          | 6605       | 2778         | 8112                   | AAATACTTGAGAGGCTAATC    | AAATACTTGAGAGGCTAATC    | 6410                 | 6410               | 7477                      | 1088                |
| 145                        | 169                         | Eukaryota     | Metazoa        | Tardigrada      | 111          | 5841       | 6761         | 1830                   | AGTCCAAATACTCGATGC      | AGTCCAAATACTCGATGC      | 564                  | 564                | 6791                      | 1151                |
| 530                        | 128                         | Eukaryota     | Chordata       | 6366            | 22424        | 30         | 4639         | AACCAACAGTGTGACCAAAGAC | AACCAACAGTGTGACCAAAGAC  | 4660                    | 4660                 | 6736               | 1677                      |                     |
| 364                        | 359                         | Bacteria      | #N/A           | #N/A            | 9128         | 17403      | 4178         | 7351                   | AGCTGATGGTAAAGGCAATC    | AGCTGATGGTAAAGGCAATC    | 7208                 | 7208               | 9308                      | 2104                |
| 954                        | 434                         | Eukaryota     | Metazoa        | Mollusca        | 17379        | 24176      | 10380        | 17308                  | TGATGCTCCCAAGTGGTGG     | TGATGCTCCCAAGTGGTGG     | 1747                 | 1747               | 1794                      | 504                 |
| 687                        | 544                         | Eukaryota     | Metazoa        | Arthropoda      | 18906        | 21636      | 8357         | 17906                  | CGGACCGACTGAGGTGG       | CGGACCGACTGAGGTGG       | 17786                | 17786              | 19061                     | 1356                |
| 823                        | 1091                        | Eukaryota     | Metazoa        | Arthropoda      | 47538        | 51889      | 38411        | 47115                  | TCACTACAGTCTCTGGGTGAG   | TCACTACAGTCTCTGGGTGAG   | 46976                | 46976              | 47712                     | 737                 |
| 61                         | 1007                        | Eukaryota     | Metazoa        | Chordata        | 4251         | 7843       | 1315         | 2250                   | ACGGGCGTATCATCTTC       | ACGGGCGTATCATCTTC       | 2186                 | 2186               | 4417                      | 252                 |
| 192                        | 141                         | Eukaryota     | Metazoa        | Cnidaria        | 496          | 8823       | 1573         | 4081                   | CGGACCAACAGTGAAT        | CGGACCAACAGTGAAT        | 398                  | 398                | 800                       | 3                   |
| 186                        | 187                         | Eukaryota     | Metazoa        | Cnidaria        | 9299         | 10669      | 6551         | 9014                   | GGCAAGACTTGTACTTACTCG   | GGCAAGACTTGTACTTACTCG   | 8754                 | 8754               | 9425                      | 852                 |
| 576                        | 531                         | Eukaryota     | Metazoa        | Amniota         | 6229         | 12881      | 14329        | 18974                  | CGATGCTATGAGGCTATG      | CGATGCTATGAGGCTATG      | 12881                | 12881              | 14428                     | 1748                |
| 361                        | 360                         | Bacteria      | #N/A           | #N/A            | 284667       | 285116     | 281530       | 28285                  | CGCCAGCATCTCATATA       | CGCCAGCATCTCATATA       | 28248                | 28248              | 28457                     | 210                 |
| 694                        | 625                         | Bacteria      | #N/A           | #N/A            | 256          | 3216       | 4761         | 8845                   | CTTGTATCTTCTCCAGAG      | CTTGTATCTTCTCCAGAG      | 3047                 | 3047               | 3411                      | 1795                |
| 329                        | 329                         | Bacteria      | #N/A           | #N/A            | 3222         | 4429       | 4            | 2889                   | ACCAATAAAGAGATCGAAG     | ACCAATAAAGAGATCGAAG     | 2578                 | 2578               | 4841                      | 841                 |
| 115                        | 90                          | Bacteria      | #N/A           | #N/A            | 1488         | 2991       | 4377         | 4724                   | TTGATCCCTGCTGCTTATC     | TTGATCCCTGCTGCTTATC     | 2977                 | 2977               | 3451                      | 1515                |
| 115                        | 90                          | Bacteria      | #N/A           | #N/A            | 4836         | 5213       | 4377         | 4724                   | CTTCCAGGCGCAACT         | CTTCCAGGCGCAACT         | 4553                 | 4553               | 4856                      | 304                 |
| 333                        | 251                         | Bacteria      | #N/A           | #N/A            | 193          | 1771       | 3051         | 4071                   | TGAGAGCGGCAAAAGTAT      | TGAGAGCGGCAAAAGTAT      | 1616                 | 1616               | 3152                      | 1537                |
| 502                        | 1233                        | Eukaryota     | Metazoa        | Chordata        | 5087         | 9251       | 4            | 3623                   | TCTTCGGCAATATGATCAAC    | TCTTCGGCAATATGATCAAC    | 342                  | 342                | 6748                      | 2337                |
| 91                         | 140                         | Eukaryota     | Metazoa        | Arthropoda      | 6993         | 6993       | 4407         | 4773                   | TCAAGTCTCTCTTCAAGAG     | TCAAGTCTCTCTTCAAGAG     | 3818                 | 3818               | 4537                      | 643                 |
| 226                        | 226                         | Bacteria      | #N/A           | #N/A            | 5008         | 5787       | 5938         | 6618                   | CAGAGAAACCTCCGTGTATG    | CAGAGAAACCTCCGTGTATG    | 5237                 | 5237               | 6178                      | 70                  |
| 136                        | 415                         | Bacteria      | #N/A           | #N/A            | 6165         | 11938      | 4066         | 5921                   | CGATCTCTAATAGCTGAAG     | CGATCTCTAATAGCTGAAG     | 5800                 | 5800               | 6354                      | 515                 |
| 1188                       | 457                         | Bacteria      | #N/A           | #N/A            | 1338         | 1383       | 3538         | 4399                   | TGCTGATGATGAGGATG       | TGCTGATGATGAGGATG       | 3648                 | 3648               | 3988                      | 0                   |
| 446                        | 445                         | Bacteria      | #N/A           | #N/A            | 430215       | 431403     | 426327       | 429238                 | TAGAAGCGTGAACAGAAGAC    | TAGAAGCGTGAACAGAAGAC    | 429047               | 429047             | 430321                    | 1275                |
| 439                        | 437                         | Bacteria      | #N/A           | #N/A            | 1552         | 2373       | 2377         | 3896                   | AGTGTCTGCTGTGGGAG       | AGTGTCTGCTGTGGGAG       | 2231                 | 2231               | 2545                      | 313                 |
| 291                        | 187                         | Bacteria      | #N/A           | #N/A            | 2079         | 2084       | 726          | 2628                   | CTGATGCTGCTGCTGCTGAC    | CTGATGCTGCTGCTGCTGAC    | 192                  | 192                | 2262                      | 262                 |
| 259                        | 259                         | Bacteria      | #N/A           | #N/A            | 3748         | 3748       | 5337         | 6316                   | AGTCTCTGCTGCTGCTGAC     | AGTCTCTGCTGCTGCTGAC     | 3580                 | 3580               | 3838                      | 309                 |
| 292                        | 292                         | Eukaryota     | Metazoa        | Chordata        | 39           | 2652       | 4569         | 6015                   | GGATCTATATACCCTAAGC     | GGATCTATATACCCTAAGC     | 2652                 | 2652               | 3183                      | 625                 |
| 186                        | 188                         | Eukaryota     | Metazoa        | Arthropoda      | 4439         | 9842       | 519          | 3119                   | TTGAGCATGCAATCAGGATG    | TTGAGCATGCAATCAGGATG    | 2953                 | 2953               | 4607                      | 1673                |
| 277                        | 328                         | Eukaryota     | Metazoa        | Arthropoda      | 284667       | 285116     | 281530       | 28285                  | CGCCAGCATCTCATATA       | CGCCAGCATCTCATATA       | 28248                | 28248              | 28457                     | 210                 |
| 151                        | 147                         | Bacteria      | #N/A           | #N/A            | 14873        | 17814      | 19720        | 21637                  | AGGCGCATACAGACAAG       | AGGCGCATACAGACAAG       | 17603                | 17603              | 19825                     | 2223                |
| 95                         | 90                          | Bacteria      | #N/A           | #N/A            | 1311         | 2350       | 127          | 582                    | CAGAAGTACATCTGCCTTC     | CAGAAGTACATCTGCCTTC     | 487                  | 487                | 968                       | 1                   |
| 204                        | 200                         | Bacteria      | #N/A           | #N/A            | 7984         | 9949       | 7098         | 7712                   | TCAAGCTGATGCTTGGTATG    | TCAAGCTGATGCTTGGTATG    | 7557                 | 7557               | 8102                      | 546                 |
| 215                        | 279                         | Bacteria      | #N/A           | #N/A            | 653          | 2501       | 2            | 649                    | ATGGCTGCTGCTGCTGCTGAC   | ATGGCTGCTGCTGCTGCTGAC   | 450                  | 450                | 616                       | 166                 |
| 943                        | 514                         | Bacteria      | #N/A           | #N/A            | 6439         | 8123       | 690          | 3885                   | CGGACCTCTCAAGGAGAG      | CGGACCTCTCAAGGAGAG      | 3798                 | 3798               | 4678                      | 2781                |
| 338                        | 333                         | Bacteria      | #N/A           | #N/A            | 653          | 3314       | 314          | 7703                   | CAGAAGCAAGACTACAGCTTAC  | CAGAAGCAAGACTACAGCTTAC  | 3112                 | 3112               | 3619                      | 1917                |
| 428                        | 259                         | Bacteria      | #N/A           | #N/A            | 18170        | 23140      | 15619        | 17678                  | ACCTGTGTAGCTTCTCTG      | ACCTGTGTAGCTTCTCTG      | 17598                | 17598              | 18120                     | 523                 |
| 369                        | 303                         | Bacteria      | #N/A           | #N/A            | 73510        | 75213      | 72265        | 74492                  | CTAGTCCGGCTATCGCTTCTC   | CTAGTCCGGCTATCGCTTCTC   | 73388                | 73388              | 73661                     | 276                 |
| 1188                       | 1246                        | Bacteria      | #N/A           | #N/A            | 4008         | 5086       | 6978         | 10345                  | TGCTGATGATGAGGATG       | TGCTGATGATGAGGATG       | 6848                 | 6848               | 7137                      | 2155                |
| 154                        | 154                         | Bacteria      | #N/A           | #N/A            | 2730         | 4429       | 5602         | 6096                   | CATCCAGCAGGAAAGTACAC    | CATCCAGCAGGAAAGTACAC    | 4299                 | 4299               | 4798                      | 1                   |
| 723                        | 918                         | Eukaryota     | Metazoa        | Arthropoda      | 2            | 4272       | 5981         | 9223                   | GAGAGCGTACAGCTATATATCC  | GAGAGCGTACAGCTATATATCC  | 4190                 | 4190               | 6124                      | 1966                |
| 608                        | 290                         | Eukaryota     | Metazoa        | Nemertea        | 101          | 2261       | 6488         | 6503                   | CAATCAAGTCAAGAGAGCAATC  | CAATCAAGTCAAGAGAGCAATC  | 286                  | 286                | 2664                      | 604                 |
| 191                        | 127                         | Eukaryota     | Metazoa        | Chordata        | 19209        | 36658      | 7272         | 17474                  | GTACATCTTCAAGTATTAG     | GTACATCTTCAAGTATTAG     | 17295                | 17295              | 19379                     | 2085                |
| 613                        | 397                         | Eukaryota     | Metazoa        | Chordata        | 73151        | 72462      | 62171        | 68540                  | ACGTTGGACTCAACATTTGATG  | ACGTTGGACTCAACATTTGATG  | 68357                | 68357              | 71482                     | 3126                |
| 190                        | 249                         | Eukaryota     | Metazoa        | Chordata        | 1788         | 9384       | 123          | 9007                   | ATGGAGCGGGTGGTAAATCTG   | ATGGAGCGGGTGGTAAATCTG   | 9041                 | 9041               | 1068                      | 20                  |
| 692                        | 757                         | Eukaryota     | Metazoa        | Chordata        | 10682        | 12862      | 6211         | 2217                   | TGAGCGTCAAGTATTGAG      | TGAGCGTCAAGTATTGAG      | 1807                 | 1807               | 1807                      | 1                   |
| 398                        | 505                         | Eukaryota     | Metazoa        | Arthropoda      | 2136         | 13918      | 13068        | 20194                  | CGGGGAGGTGGTGGTGG       | CGGGGAGGTGGTGGTGG       | 12590                | 12590              | 13555                     | 966                 |
| 281                        | 276                         | Eukaryota     | Metazoa        | Arthropoda      | 7353         | 10295      | 11775        | 16430                  | TTATTTTGGTGGTGGTGG      | TTATTTTGGTGGTGGTGG      | 10122                | 10122              | 11212                     | 3                   |
| 1004                       | 342                         | Eukaryota     | Metazoa        | Arthropoda      | 19970        | 22825      | 9888         | 14906                  | ATAGCGAGCTTCAAGCTGTGTC  | ATAGCGAGCTTCAAGCTGTGTC  | 17466                | 17466              | 21088                     | 3613                |
| 823                        | 1091                        | Eukaryota     | Metazoa        | Arthropoda      | 27928        | 34426      | 36411        | 47115                  | GACTGATTTGCTGACTGATG    | GACTGATTTGCTGACTGATG    | 34377                | 34377              | 36512                     | 2136                |
| 340                        | 1440                        | Eukaryota     | Metazoa        | Porifera        | 26919        | 28940      | 29409        | 31084                  | AATAAGAGCGCTGAGAG       | AATAAGAGCGCTGAGAG       | 28903                | 28903              | 29565                     | 663                 |
| 664                        | 391                         | Bacteria      | #N/A           | #N/A            | 21603        | 27066      | 27079        | 29078                  | CTCATCCCTCAACGATTCAG    | CTCATCCCTCAACGATTCAG    | 2666                 | 2666               | 3100                      | 2                   |
| 407                        | 363                         | Eukaryota     | Metazoa        | Amniota         | 5027         | 7656       | 5670         | 8406                   | CTGATGCTGCTGCTGCTGAC    | CTGATGCTGCTGCTGCTGAC    | 496                  | 496                | 527                       | 2                   |
| 357                        | 473                         | Eukaryota     | Metazoa        | Chordata        | 8978         | 12590      | 3819         | 8043                   | AACGAGTACATGCTGAC       | AACGAGTACATGCTGAC       | 7953                 | 7953               | 8264                      | 1204                |
| 263                        | 427                         | Eukaryota     | Metazoa        | Chordata        | 37405        | 40559      | 43783        | 45629                  | TCTAGCTTCAACCTGCTTC     | TCTAGCTTCAACCTGCTTC     | 4046                 | 4046               | 43871                     | 3426                |
| 481                        | 361                         | Eukaryota     | Metazoa        | Arthropoda      | 7623         | 9099       | 12355        | 10937                  | GTAGAGCGAGTAAAGTGTGAC   | GTAGAGCGAGTAAAGTGTGAC   | 9547                 | 9547               | 12524                     | 2984                |
| 746                        | 736                         | Eukaryota     | Metazoa        | Chordata        | 6518         | 8376       | 3384         | 5722                   | CXAAGGCAAGCTTGG         | CXAAGGCAAGCTTGG         | 5542                 | 5542               | 6657                      | 1116                |
| 1016                       | 764                         | Eukaryota     | Metazoa        | Chordata        | 46771        | 60653      | 37314        | 45936                  | TCAATCAAGTCAATCAACC     | TCAATCAAGTCAATCAACC     | 45743                | 45743              | 46902                     | 1160                |
| 183                        | 205                         | Eukaryota     | Metazoa        | Amniota         | 2440         | 6116       | 7528         | 8718                   | CGATGATCAAGTCAAGAGCAATC | CGATGATCAAGTCAAGAGCAATC | 5923                 | 5923               | 7794                      | 3                   |
| 796                        | 683                         | Eukaryota     | Metazoa        | Arthropoda      | 11253        | 14250      | 13461        | 19178                  | GTAGCTTCAAGGCAAAATAAG   | GTAGCTTCAAGGCAAAATAAG   | 17278                | 17278              | 18456                     | 1159                |
| 886                        | 870                         | Eukaryota     | Metazoa        | Chordata        | 33613        | 41061      | 28449        | 34105                  | TCTTCAACTGATCCTCAACC    | TCTTCAACTGATCCTCAACC    | 33454                | 33454              | 34278                     | 20                  |
| 133                        | 108                         | Eukaryota     | Metazoa        | Arthropoda      | 1913         | 4735       | 5695         | 7800                   | TGCTTCTTAAAGTCTCTC      | TGCTTCTTAAAGTCTCTC      | 456                  | 456                | 5876                      | 1312                |
| 187                        | 524                         | Bacteria      | #N/A           | #N/A            | 78241        | 78241      | 78863        | 79123                  | ATCCGAGTCAAGATTTGAG     | ATCCGAGTCAAGATTTGAG     | 79263                | 79263              | 79864                     | 1337                |
| 707                        | 797                         | Eukaryota     | Protist        | n               | 29403        | 30347      | 27056        | 29387                  | GGCTACGACTTCTTCTTGTC    | GGCTACGACTTCTTCTTGTC    | 28602                | 28602              | 30073                     | 1472                |
| 951                        | 686                         | Bacteria      | #N/A           | #N/A            | 2464         | 4455       | 6885         | 11599                  | CTTGGAGCGAGAAAGCAC      | CTTGGAGCGAGAAAGCAC      | 4401                 | 4401               | 4662                      | 2562                |
| 100                        | 713                         | Eukaryota     | Metazoa        | Hemichordata    | 4868         | 8302       |              |                        |                         |                         |                      |                    |                           |                     |
