# Supplementary material
Source: PubMed Central journal article supplement (PMC4702960)
Supplement: pnas.1510461112.sd03.pdf [file pnas.1510461112.sd03.pdf]

**Metazoan and HGT intronic donor (5') and acceptor (3') sequences**

| <u>Metazoan 5' Splice sites</u> | <u>Metazoan 3' Splice sites</u> | <u>HGT 5' Splice sites</u> | <u>HGT 3' Splice sites</u> |
|---------------------------------|---------------------------------|----------------------------|----------------------------|
| TACACAGCAGGTAAGTAGGACG          | GTCTATTTGCAGATTGTCATCC          | TCGGAAC TTGGTAAGAAAATAT    | TTCTATCTACAGGAATGATACC     |
| TCGACGACAGGTGTGTAAGGAA          | CTTGATTTGCAGGGGAGCGCAA          | TATAAATAAAGTACGCACCTAT     | TTCCGGCCTTGAGGAGCGGTCCT    |
| TACATTGAAGGCATGCCATATC          | TGTTCCATATAGGATAAAGGCT          | TGGCATCCAGGTTAGGGATGTT     | TTTTCGTTTCAGATCCTGAACC     |
| TCGTTATCGGGTAGATGGTCAA          | CAGACTTTTCAGGTTTCATCGTG         | GTATATCAAGGTATGTGTGATG     | TGGAGATCGCAGACGGATCTGA     |
| CCGTGGAACGGTACGATTTTCC          | CGACAGTATAAGCTGACATTCA          | TAAC TTACAGGCACGGTTTTTG    | TTATATTTTCAGACGGAACGAT     |
| CCAGTCACCGGTATGATCCTCA          | TGAAATATTCAGGATTTACGAG          | TGGACAGAAGGTACATAACTGA     | TTTTACTTTTCAGTCGGTGGCAC    |
| TTTCCGGACAGTAAGTACATGT          | CTTCGTTTATAGCTTGGCCGTG          | TACTTGGAAAGGTGAATATATAC    | TTCATATTTTCAGCGGTGCCTCC    |
| CGGACCTGTGGTACGTTTTACC          | CTTTTATATTAGGCACGTCAAG          | TATTTTCTTAGTAAACAAAAAT     | TTCGTCTGCCAGGTGGGAGTGT     |
| AACTTGATATACTGCACCTGCG          | ACGTCATTGTAGTTCACCCCAG          | GCGTACGGCGGTGAGACAAATG     | TCGAGGTTTCAGACACAAACTG     |
| GTGGACCCCGGTAAGTGAAGCG          | TCATTATTTTCAGGTCATCAAGA         | TCTTTGCCGGCTAAAGCGCGTC     | TTGGTTTTCAAGGCGGAATTCC     |
| GCCACTCGGGGTAAATATAAAT          | TTTGTCTTGCAGTACAGCGTCT          | TTGGTTCCAGGTGCGATATAAA     | TTTTTACGTTAGGTTGAATGTA     |
| CGTTATCAGGGTACGTGAAGGG          | GCGTGCGCATAGGTCGTCTTCG          | TATTTTCTTAGTAAACAAAAAT     | TTTCGTCTGCCAGGTGGGAGTGT    |
| GACAAAAGACGTAAGCTTGCAA          | CAAGAGTTCAAGCTTAATGTGA          | GGGACTTGACGTAAGTTTCCGC     | TGCCAACCTTAGGTGGAATTCT     |
| GAATCGAAGAGTGGGTTCTTAA          | TCTTATCCGCAGCGGGCGTGCA          | TGGACAGAAGGTACATAACTGA     | TTTATTGCAGAGCATCAAGACC     |
| ATGCATCCCGGTAAGAATTTGT          | CATTTTTTATAGAGCTTTGAAG          | GTCCTTGAAGGTAAGGCTCTTC     | TGTTCTTGATAGGACTCGTCAC     |
| TTGGGTGGAGGTGAGTTCATC           | ACTGGTATTTAGGCCATCATCT          | GCGTGCATCTGTTGGGTAAGTG     | TCGAGGTTTCAGACACAAATTG     |
| CTTCACATGGGTAAGTTTCTTT          | CGGTAATTGTAGGAGTCTTTGA          | TACATTTCCGGTAAACTAGTGG     | TTATTTTTTCAGTTAAATTTGT     |
| TCCTTGTCAGGTTTGTCTATTA          | CCTAATTGACAGGAAGTGCAAC          | GTTTCGACTTGTAAGTTTTGTT     | TGTTTGCTATAGGAACTGGAGA     |
| CCTTGATGTTAAGTCTGTCC            | AGGTGGCTCCGGAGGATGAAGG          | GGAGAACACCGTTCTCATTCTGA    | TCGTGTTATCAGAAGACAGATT     |
| GGGTTGGCGGGTTAAACGGTAA          | TTTTTTTAAACAGTGATGACAAAT        | TTTATTTGCTGTTGTCCCTACA     | TTTTTTGCAAAGGCACTACCAC     |

### Codon usage table

| Amino Acid | Codon | Hd_Metazoan | Hd_HGT | N. koreensis | F. taffensis |
|------------|-------|-------------|--------|--------------|--------------|
| Ala        | GCG   | 0.28        | 0.34   | 0.2          | 0.12         |
| Ala        | GCA   | 0.18        | 0.16   | 0.21         | 0.38         |
| Ala        | GCT   | 0.22        | 0.15   | 0.18         | 0.39         |
| Ala        | GCC   | 0.32        | 0.35   | 0.41         | 0.11         |
| Cys        | TGT   | 0.37        | 0.42   | 0.59         | 0.72         |
| Cys        | TGC   | 0.63        | 0.58   | 0.41         | 0.28         |
| Asp        | GAT   | 0.43        | 0.49   | 0.66         | 0.79         |
| Asp        | GAC   | 0.57        | 0.51   | 0.34         | 0.21         |
| Glu        | GAG   | 0.49        | 0.46   | 0.25         | 0.23         |
| Glu        | GAA   | 0.51        | 0.54   | 0.75         | 0.77         |
| Phe        | TTT   | 0.44        | 0.42   | 0.68         | 0.63         |
| Phe        | TTC   | 0.56        | 0.58   | 0.32         | 0.37         |
| Gly        | GGG   | 0.17        | 0.15   | 0.15         | 0.1          |
| Gly        | GGA   | 0.29        | 0.17   | 0.16         | 0.53         |
| Gly        | GGT   | 0.21        | 0.21   | 0.29         | 0.29         |
| Gly        | GGC   | 0.33        | 0.48   | 0.41         | 0.08         |
| His        | CAT   | 0.48        | 0.47   | 0.64         | 0.67         |
| His        | CAC   | 0.52        | 0.53   | 0.36         | 0.33         |
| Ile        | ATA   | 0.13        | 0.08   | 0.21         | 0.11         |
| Ile        | ATT   | 0.37        | 0.32   | 0.4          | 0.63         |
| Ile        | ATC   | 0.5         | 0.6    | 0.39         | 0.26         |
| Lys        | AAG   | 0.52        | 0.57   | 0.3          | 0.22         |
| Lys        | AAA   | 0.48        | 0.43   | 0.7          | 0.78         |
| Leu        | TTG   | 0.2         | 0.24   | 0.22         | 0.37         |
| Leu        | TTA   | 0.08        | 0.06   | 0.18         | 0.29         |
| Leu        | CTG   | 0.29        | 0.35   | 0.37         | 0.08         |
| Leu        | CTA   | 0.06        | 0.04   | 0.03         | 0.06         |
| Leu        | CTT   | 0.14        | 0.11   | 0.11         | 0.15         |
| Leu        | CTC   | 0.23        | 0.2    | 0.08         | 0.06         |
| Met        | ATG   | 1           | 1      | 1            | 1            |
| Asn        | AAT   | 0.44        | 0.41   | 0.54         | 0.68         |
| Asn        | AAC   | 0.56        | 0.59   | 0.46         | 0.32         |
| Pro        | CCG   | 0.46        | 0.43   | 0.29         | 0.17         |
| Pro        | CCA   | 0.18        | 0.16   | 0.16         | 0.43         |
| Pro        | CCT   | 0.14        | 0.13   | 0.21         | 0.3          |
| Pro        | CCC   | 0.22        | 0.29   | 0.33         | 0.1          |
| Gln        | CAG   | 0.6         | 0.65   | 0.57         | 0.26         |
| Gln        | CAA   | 0.4         | 0.35   | 0.43         | 0.74         |
| Arg        | AGG   | 0.08        | 0.05   | 0.15         | 0.03         |

**HGT coding sequences used for codon usage calculations.**

>maker-scaffold5140\_size14114-augustus-gene-0.10-mRNA-1  
ATGTTGCTCACCTCACTCCTTGTTCGCGGTTCAGCTGTGTGGCCTTGATCGGGCGCGCAA  
CCTTCACCGGTGATGCCACCTACACCACACCCGGTCTCGGGGCTTGCGAAGTCAACA  
GCCGCGCCAGCGACATTGTTCATCGCCATGAACCGTGAGCAGTTTCGGCAGCCCGGCC  
GCGGCCGCGACTCGGTGTGGTGCAACAAGTTCGTCAAGGTGACCGCCACCAAGTTCG  
GCACCTCCGTGACGGCTCGCGTGCTTGACCGATCGTTCGGGAAAGAAGGGTCAGTTGG  
TGTTGTCGGAGAACGCCTTCAAGCAACTGGCTTCCACCGACGAGGGACGCATCGCCA  
TCAGCTGGAAACAAGTCCCATGCTAG

>maker-scaffold8243\_size10304-augustus-gene-0.8-mRNA-1  
ATGTTGCTCACCTCACTCCTTGTTCGCGGTTCAGCTGTGTGGCCTTGATCGGGCGCGCAA  
CCTTCACCGGTGATGCCACCTACACCACACCCGGTCTCGGGGCTTGCGAAGTCAACA  
GCCGCGCCAGCGACATTGTTCATCGCCATGAACCGTGAGCAGTTTCGGCAGCCCGGCC  
GCGGCCGCGACTCCGTGTGGTGCAACAAGTTCGTCAAGGTGACCGCCACCAAGTTCG  
GCACCTCCGTGACGGCTCGCGTGCTTGACCGATCGTTCGGGAAAGAAGGGTCAGTTGG  
TGTTGTCGGAGAACGCCTTCAAGCAACTGGCTTCCACCGACGAGGGACGCATCGCCA  
TCAGCTGGAAACAAGTCCCATGCTAG

>maker-scaffold16020\_size5552-snap-gene-0.6-mRNA-1  
ATGTTGCTATTCTTTATTTTTTTAACTTTTCTCTTATTCAATCTCCGATAGAATGTCA  
AAGTACGCAGAAGTCAACAACCCATCTGCAAAACCTAGAACGACAGGACAACCAGC  
GGTCCGATAACGCCCCGGCACACCTCATCGAGGGCATTGGTCCACCACCTAATCCCA  
GTATTTCGTTTCAGCCCAACCTTCCACATCCAGATGCATAATATCACCTTTCAGGCAAT  
CCATTCTTCCAACCTTGTCATCTTTGTTTTGGACGCTCACGCGGCAGCTTTCACGCCA  
GCACAGGTTGCCACGCTTCGCGGGCAAACAAGACCCTCCTAGCTTACCTTTCACTG  
GGCGAGGCGGAGAACCTTCGCCGGTATTGGCAACCGTTTTGGCAAACCCCGATTCA  
GGTCCGGATTTCTTGGTCACACCGTTTGAAGCTGACTCCGCACAGACAGAACACATC  
CTGCCATGGGGCTACTCGGGTTTGTTTTTGGACGCCTTGACGCCTATCAGTACTTTA  
CGGACGACGCGTCCACGACTCACAGGCGGAGATGATTGCCTTTGTTCGGCTGACCA  
GGAACCAGGCCAGACTAACAGCACCTGACTTGAAGGTCTTCGAAATAACGTGCCTG  
AGTTGTATGAAGTGAACCTCGTTCAAGGGGCTGGTAGATGGACTGGCGGTTTCGGAGA  
CCTGGTTTAAGAATGGCGACACAGCGCTCTCGGGGACGAACTTGCCCTTTGTGGAGA  
ATGTCTTGAAGTGGACGCGCTTGCGGAAGGCCGATGGGAAAACCTGTATTGGCGGTAG  
ATTTCCCACCTTACCGGAGAATGATAATAATTCGAGAAGAGATATGGAGAACAGG  
ATTATGAATTATGATTATAATGACGGTGCCAAACCGATCAAGATGGGTGGCAGAAAA  
TGCACGTGGAAACAATTGCGGCAAATACGCAGTATGACTACGTATGACTACGTATGA

>maker-scaffold12969\_size7296-augustus-gene-0.6-mRNA-1  
ATGTTGCTATTCTTTATTTTTTTAACTTTTCTCTTATTCAATCTCCGATAGAATGTCA  
AAGTACGCAGAAGTCAACAACCCATCTGCAAAACCTAGAACGACAGGACAACCAGC  
GGTCCGATAACGCCCCGGCACACCTCATCGAGGGCATTGGTCCACCACCTAATCCCA  
GTATTTCGTTTCAGCCCAACCTTCCACATCCAGATGCATAATATCACCTTTCAGGCAAT  
CCATTCTTCCAACCTTGTCATCTTTGTTTTGGACGCTCACGCGGCAGCTTTCACGCCA  
GCACAGGTTGCCACGCTTCGCGGGCAAACAAGACCCTCCTAGCTTACCTTTCACTG  
GGCGAGGCGGAGAACCTTCGCCGGTATTGGCAACCGTTTTGGCAAACCCCGATTCA  
GGTCCGGATTTCTTGGTCACACCGTTTGAAGCTGACTCCGCACAGACAGAACACATC  
CTGCCATGGGGCTACTCGGGTTTGTTTTTGGACGCCTTGACGCCTATCAGTACTTTA  
CGGACGACGCGTCCACGACTCACAGGCGGAGATGATTGCCTTTGTTCGGCTGACCA  
GGAACCAGGCCAGACTAACAGCACCTGACTTGAAGGTCTTCGAAATAACGTGCCTG  
AGTTGTATGAAGTGAACCTCGTTCAAGGGGCTGGTAGATGGACTGGCGGTTTCGGAGA  
CCTGGTTTAAGAATGGCGACACAGCGCTCTCGGGGACGAACTTGCCCTTTGTGGAGA  
ATGTCTTGAAGTGGACGCGCTTGCGGAAGGCCGATGGGAAAACCTGTATTGGCG

>augustus\_masked-scaffold4613\_size15117-processed-gene-0.7-mRNA-1

ATGTTGCGTGTGCAGCAACGGTCAGCGTTCTATGCCGATTTGCGATGGAGCGGTTGG  
GAGCAAGAGGTTGCGGCATTGCCGGCAAACATGGGGCTGAGTGTGTATCCGCCACTG  
TGGAGTCGCGAGTCGAGACCGATTGAAGCGACTCGTCGCGCAGTCATTCCGATTGCA  
GAGCTCGTAACGGGAGTGTGGAGATGGCGCGGCAGATGAGGCGCTCACGCTCGGG  
AAGTACTTCCGCCGCCCTGCCGGGGCGGTTAAGGCACACCTCGCTTCCACGGGTT  
GCGCTGCGCCCGGAGGTCGCGGGCTTCGCTCCACCCGTGGCTACCCGCCCGCGCCC  
CTTTGGGGCGAAGAGGCATATTGCTGAGCGCTGTCTTTGTGGCGTGAAGAGACATCT  
CGCCGCGCTCGGGTCGGTCATTGCGAACAGTGAATGCCCGTGTGGCGAGTCAACGGA  
AAGCCACAGATGGTGGTGTGGATGGGTGTGCAACGACGTTGTCTGGCATGGGCAAC  
CGGTCGGCCCGGACTCGATAGACTGCACTGCAACATTATGAAAAGCAAAGCCACCA  
CAGTCGCGGCGTATTTGAAATCGCTACCACCTGATCGCCGCGCGGCGATTGAGCAGG  
TGCGGCGGGTGATCTTGGATCATCTGGATGCGGGCATTGAGGAGTGCATGCAGTACG  
GGGCGATCGGCTATTGCGTGTGCGACAAGGTGTGGCCGCACGGGCATCACACGCGGC  
CGAACTGCCGCTGATGTACATGGGGTTGTCGTCGCGAGAAGAACGACATGGTGGTGT  
ACATGTTGTGTCTGTATCAGAACGAGCCGATGCGCGAGTGGTTTGACAAGGCGTGGA  
AGGCGACGGGGAAGAAGCTGCACCTGGAAGTGAGCGGGGCGGGGTGTTGTGTGCGG  
TTTACGAAGGTGGAGGACCTTGCCTGGATGTGATCGGCGAGACGATGCGGCGCATG  
ACCGTGCGGAAGTATTTGAAGCATCGTGTGGCGATGCTGGAGCGGATGGGGAAGGG  
GCCGGAGGGGAAGACGAGCAAGAAGACGGCGCGGAAGACGAGTGTGAAGAGAGGA  
AGTATGGGGAAGAAGACAACGCGCGTGGGGAAGAACGCGAAACCTGCGGCGAAGA  
AGATCGGGCGCGCGGCGAGGTGA

>snap\_masked-scaffold3918\_size16737-processed-gene-0.6-mRNA-1

ATGTTGCGTGAAGCAAACACCATTTACGCCGAAGACACCCGGGTAACAAGAAAATT  
GCTCAATCACTACGAAATACAGAAACAGTTAATTCGGTTTCATGCGCACAAACGAACA  
CAAACAGTTGGAACGCACTTTGCAAACCATTGCGGAGAATGAAATCACCGTTTTGGT  
TTCCGATGCAGGCACGCCCGCATTTTCGGATCCCGGATTTTTAGTGGTGCGCGCGTG  
CATTGAAAACGATTTGGATGTAACCTGTTTGCCCGGCGCTACAGCTTTTGTACCTGCT  
CTGGTAGCAAGCGGGTTTCCATGCGACCGGTTTGTGTTTGAAGGCTTTTTACCACACA  
AAAAGGGACGACAAACCAATGGAAGTCGTTTGTAGAAGAAGATCGCACAAATCATC  
CTCTATGAATCTCCGCATCGCCTGGTGAAAGCATTAGAGGAAATCAGTACATTTTTG  
GGTCCGGATCGCATTGTTTGCCTGGCCAGAGAAATCAGTAAGTTTTTTGAGGAATTC  
AAACGCGGAACGGCTACCGAAGTCTTGAACATTTCAAAAAAACACCACCGAAAGA  
AGCATTCCGGCTTGAACACTACGCGGATGTGATGGCTCGTCGTGGATTGTACCGTGAAGC  
ACCTCCTATGCCCTGTGTGATCGGTTATGAAGTTGTTGGAATTGTGGAAGCTGTTGGT  
GCAACTGCCAATCAGGAATTGGTTGGAACACGGGTTGTCGGGTTTTGTCGCTTCGGA  
GGATATGCCCAGCATGTCATAACAGAATCACATGCTGTAGTAGCTATTGGCGAAATG  
GAAGCCGGAGAAGCCTTGGCATTAGCCACTCAGTTTGTAAACGGCTCATTACATGGTA  
GAACGCACGGCCAATGTACAGGCAGGAGAGCGTATTTTAATTCACGCAGCTGCAGGT  
GGTGTGGGAACAGCGTTGATTCAACTCTGTAAACGTAAAAATGCATTGGTTTTCGCA  
AAGATCGGTTACGAAACAAAGAAAAAACGGTGCCTGATTTAGGCGCAGACGAAGT  
AGTAGTGTATTCGGA AAAACCGTATGCCCAAAGTGTACAAAATTGGTTGGGAACCGA  
GCGATTGGATGTAAGTTTTAATCCGGTTGCGGGTTCAACATTCAAACACGATTTTGA  
TTGCTCGGAACCGGTGGTTCGAATGGTACTTTTTGGCGGATCGGAACTTTCAGGCAAG  
CGTTGGGGCCTATTTTCGACCTTAAATTTGTGCGCAAAATGGGATTCGTGATTCGGA  
TCGGATTAATGATGCGTTCCAAAGCAGTGTGGGAGTAAACATGCTGAAAGTTGCTG  
ATTTAAGCCGGAAGTACTCACGCAATGTTTGTGTTGAAGTGGTTTCTTTGGCGAAAA  
ACGGCGATATAAAACCCATTGTAGGTGAGCGTTTTAAGCAACATGACTTTACTACAG  
CTCATAATCAACTCGAAAGTGGCACAACAATTGGAAAACCTAGCCGTGTTTTGGAATC  
AATAA

>snap\_masked-scaffold15350\_size5884-processed-gene-0.5-mRNA-1

ATGTTGCGCGTCTCAATTCTCTCCTGTGTGCGCGTAGTTGAGGCGATGAGCTGGCAAC

CTACCAACGACCCCATCGCGGGCGATCGGCATTCATGCAATGCCATCGAGCACGTGA  
TCGTGCCGCGCGCGCGGGATCTGGGCGGCTTTTCAGTGCGCCGAGCGCTGCCGGCGG  
CCGCCAAGCAGATGATCGGCCCTTCATCTTCTTCGACCAGATGGGTCCCGCCGAAT  
TCGTGATCGGCAAGGGCATCGATGTCCGTCCGCATCCCCATATCGGCCTCGCCACGG  
TCACCTATCTGTTTCGAGGGCGAGGTGTACCATCGCGACAGCCTGGGTTCGTGCTGC  
CGATCCGGCCGGGCGCGGTCAACCTGATGACGGCGGGACGCGGCATCGTGCATTCCG  
AACGCGAGACGAGCGAGGGCGCAGGGCGCACACCCGCGGCTGTTTGGCATCCAGGCG  
TGGGCGGCACTCCCAAGACGCACGAGGAGCAGGGCGCCCGCCTTCGTCCACCACGA  
CGCCGGCGAGTTGCCGCGCGTGACCGGCGAAGGCAAGACCGTGCGGCTCGTGATGG  
GCCGAGGGTATGGGGCGCAGTCGCCCGTGCATTCCCGCATGATGCGCTTTTCGCGG  
AGGCCGTGCTGGCGCCGGGCGCGGTGCTGCCGCTCGACCCCGACTACGACGAGCGG  
GGTATCTATATCGCCTCGGGCGCGATCGACGTGCGGGCGAGCGGTTTCGACGAGGGC  
CAGCTGCTGGTGTTC AAGCCTGGTGACCGGATTTCCGTATTGGCGCTGAGCCAGTCG  
CGCCTCGTGCTGGTGGGCGGAGAGCCCATGGACGGTCCGCGGCACATCTGGTGG AAT  
TTCGTATCATCGTTCGCGCGAGCGCATTCGGGCGGCGAAGGAAGACTGGGCGGCGAA  
GCGCTTTGCGTTGGTGCCTGGGGATGAGGTCGAGCGGATTCCGTTGCCGGAGGCTTG  
A

>augustus\_masked-scaffold13572\_size6930-processed-gene-0.1-mRNA-1

ATGTTGCGCATTTACGTGCAAACCGAAGACAAAGAAGTAACGCAATGGATTTCTACC  
AAAGGATATTTTGTAAGTATTTGGCAGGTTTTGTTTTTGAACACCCGCCCGTTGGA  
CCATTCAAGCACTTTCAGATGTAGAACTCTACACCATCAACCGGGCAGATTATACCA  
ACATCAACAAGCTGGTTCGAAATGGCACGAAGTAAAGAACTCTTCATTGCACGCT  
GTTTCATTATACTTGAAGATCGTATTTTACGCATCTATCCATGACGGCAGAAGAGCG  
GTACAACCTCTTTTTTGAACACAACAAGAACTCTTCAACCAAGTTCGTTGCAATAC  
ATTGCCTCTATGCTTGGGATGACACCTGAGACCTTTAGTCGCATCCAAGCGCTATG  
AATATTCTTGTACCGGTGGTGCCGGTTTTATCGGTTACATCTTGTACGTTTGTGGT  
CAACAAGTACCCGAATTATCACATTGTCACCTTTGATGCGTTGACGTATGCCGGAAA  
TCTTTCCAACCTGGAGGATCTGAAAGACGCACCGAATCATACTTTTTTGAAGGCGA  
CATTACCAATCGGGAAGATATTCGGGGTGCCTGGAAAACCTTCGGGATCACCGACAT  
TATTCACTTAGCCGCAGAATCGCACGTAGATCGATCCATTGAAGGACCACTACCGTT  
TGTTACCACCAATGTAGTAGGAACGGTAAACCTCATGGAAGAAGCCAGAAAATTTG  
GAAAGACCTTGCAGGACATACGTTTTACCATGTTTTCAACCGACGAAGTTTTCGGTT  
ATTAGACAAGGAAGGCTTTTTACGGAAGAAACACCCTATGATCCGCGCAGTCCGTA  
TTCTGCATCAAAGCGGCTTCCGATCACTTTGTAAGTGCCTATTTTACACCTTCGGA  
TTACCAATCAAGCGCTCCAACCTGTTCCAATAATTACGGTAGTCATACCATCCGGAA  
AACTTATTCCGCTGATGATCAACAATATTTTAAACCGAAAACCGCTTCCTGTATATG  
GTGAAGGGGTGAATGTACGCGATTGGTTGTGGGTGGAAGATCATGCACGAGCCATTG  
ATCTTATTTTTACGAAGGAAAAGTAGGTTGCAATTACAATGTAGGTGGTTGGAACG  
AATGGCGAAAACATTGATTTGGTAAACGAATTATGTGTCATTATGGACGAATTATTGG  
ATCGAACTTCCGGAGAAAAGCGCCCAATTAATCACGTTTGTAAAAGACCGCGCCGGAC  
ACGATCAACGCTATGCCATTGATGCAACCAAAATTGCACCGCGAATTGGGCTGGAAC  
CAAGTATTACGTTTTCGAGGATGGATTGCGCCAAACCGTAAAATGGTACCTCGAAAATC  
AGGCTTGGGTACGGAAGTAACTTCGGGACATTACCGCGATTATTATAAAAAAATGT  
ACGGAGAGAATTGA

>snap\_masked-scaffold973\_size32457-processed-gene-0.14-mRNA-1

ATGTTGCGCATGCCGTTTCGACCTTCGAGAGGCGAGCCGGAGCCGGGGAGCGCCGCGT  
ATGAAGATAGTCGCCGGCAATAGCAACCGCCCCCTCGCCGAGGCCATCTGCTCGGCC  
CTCAAAGTCCCGCTCACCAGGAGTGTGGTCAAGCGCTTCGCGGACATGGAAGTGTT  
GTCGAGGTGCAGGAGAACGTCCGTGGCGAGGACGTCTACGTGCTCCAGTCGACGTCG  
TTCCCGGCCAATGACAACCTGATGGAGCTGCTGATCCTAGTGGATGCGCTGAAGCGC  
TCCATGGCGCGGCGCATCACGGCGGTTCATGCCCTACTTCGGCTACGCTCGGCAGGAT

CGCCGGCCCCGACCGCGTACGCCATCTCGGCCAAGCTCGTCGCCAACCTGATCGAA  
CGTGCCGGTGTTCGACCGCGTCATGACGGTTCGATCTCCACGCCGGACAGATCCAGGGC  
TTCTTCGACATCCCCACCGACAACCTGTTTCGACGCGCCTGTCATGGTGC GCGACATCC  
AGGAGCGCTACGGGACTGGCAACCTGATGGTGGTCTCACCCGACGTCGGCGGCGTTCG  
TGCGTGCACGTGGCCTCGCCAAGCGCATCAACGTACCGATCGCCATCTGCGACAAGC  
GCCGCGAGCGCGCCGGCGAGTCCGAAGTCATGAACGTTCATCGGCGATGTGCGTGGG  
AAGCGCTGTATTCTGATCGACGACATCGTCGATAGCGGCGGCACGCTGGTCAATGCG  
GCGAGCGCCCTGCTGCAGGCTGGCGCGACCGAGGTCAACGCCTACGTCACTCACGGC  
GTATTGTCAGGCGGCGCGGTGGCCAAGATCACCAACTCGGATCTGAAGACCTTCGTC  
ATCACCGACAGCATCCAGCCGACGGAACCGGTGCGCGCAGCAGGCAACATCCGGGT  
TCTCTCGATCGCGCCTCTGCTCGCCGAAGCCGTGGCGCGCACCCGCGCGCAAGAAAG  
CGTCTCGAGCCTCTTTACTGA

>augustus\_masked-scaffold436\_size44832-processed-gene-0.9-mRNA-1

ATGTTGCGCAGTTTACAGACTTCCCCGGAACGCCGAAACAGCTTATTGCTGGCGTTC  
GCGGCATTTCGTGGTGGTGTCTTGGCTTTGGCAGTGGAGCGCGGCCTCCAATGTGTTGT  
ATCCGTTCCGGCTGCTGGTCACGTTTGTCCACGAGACGGGACATGGCTTGGCAGCAC  
TGCGGACGGGCGGCAGGTTTCTCGGCTTTGTGGTTCGAGCCGAACGGCGCGGGGTTGA  
CCACCTCTAGTGGCGGCGTGAGCTGGGTGATCTTGCCGATGGGCTACCTCGGCGCGG  
CGATCTTCGGGGCGGTGCTGCTGGTGGCGGCAACCGCGTACGCAAGATCACCAACG  
TGACGACCGTGCTGGGGGTGTATTTTCATCGGGGAAGCGATCTTCTTCACGCAGGCGG  
GCAAACCTGGAGATGCTGATCGGACTCGCAGTGGCCTTCGTCTGTGGGAGCTGGCGG  
CACGTTGGCAGGAACGGGCGACGCTGCTGCGGATTCTGGCAGGCGGCGGCGTTGCTGT  
TCGCGATTCTCGCCGTCATCAGTAACATCGCGTTGATCGTAGGGCTGATCAGCGGGA  
GTCTGTTGCTGTTGCTTGGCGTGTATGCGCCGCGTTCGGTAACGCTGTTTCATCTTGAA  
TGC GTTGGCCTTCATCATTGGTTTTAACGCGGTCAACGACATTTACAGCCTGTGGAAC  
AACCGCACGGCGTCGTTGGGCGAGGTTTCGCAACGATGCCTACGCGATGGCGAACGTC  
ACGCACCTTCCGGTGGAGTTGTGGATTATCTTGTGGACGCTGCTGGCGATTGCGATC  
ATGGGAGAAACAATAATGGCGAAAAGCTACAACAAAGCACCCGATATGGTGCATCGA  
CCCGAAGAAGACGTACACAGCGATATTCACACGAGCCGGGGCGACATCAAAGTGA  
ATTTGTTACGGATCGTGCGCCGATCACGGTCAACAACTTCGTGTTCTCGCCCGCA  
TGGCTTCTATGACGGCACCACTTCCACCGCGTGATCGGTGACTTCATGGTGCAGGG  
CGGCGACCCGCTCGGCACGGGTACGGGTGGTCCCGGTTACCGCTGGGCAGATGAGTC  
CGCCGCGCTCAAGATTCCGCACGATGGGCCGGGTACGTTGAGCATGGCAAACGCCG  
GACGTGATAACCAACGGCAGCCAGTTCTTCATCACGCACATCGCGACGCCACACCTGA  
ACGGCAAGCACGCTGTCTTCGGGAAGGTGGCTGACCCCGAAAGCCTCAAGGTGCTG  
ATGAGCATCCGCCTGCGTGATCCGGGTGCTGACCCCAAGCCGGTGATGCGCTAAC  
AGCGTGGAATTCGTCGAGAGCTAA

>maker-scaffold14830\_size6176-augustus-gene-0.8-mRNA-1

ATGTTGCGATTTTTAACGGCCGGAGAATCCCATGGCCCCTTATTGACGGCCATTCTGG  
AAGGCATGCCAGCGGGTCTGGTGGTGACCAGCGAACAAATTGATTTTCGATCTGGCCC  
GCCGCCAGCAAGGCTACGGCAGCGGTGGCCGGATGAAGATTGAACGCGATCATGCG  
CGCATCACCAGTGGCGTGATGAATGGTAAAACCACGGGCGGGCCGATTTTCGCTCATT  
GTCGAAAACCTGGACTACGCCAAGTGGAAAGGATCGCGAGATTGAGCCGATGACGAT  
TCCACGGCCAGGGCACGCTGATTTAACCGGCGCAGTGAAATATGGCTATCGCGAGTT  
GCGCCTGTCTTTGGAGCGAGCTTCGGCGCGCGAGACCACCATGCGGGTAGCGGTGGG  
CGCAGTGTGTCGGTTGCTGCTCAGCCAGTTTGGCATCACCGTGGGTGGCTACGTGAA  
GAGCGTGGGCGAAGTGCAGGCCATGGGCGTGCGTGAGTGGCGTGATGGCATGGGAG  
CGGAAGCATCGACACGAACGCTGGCCGGCGACTATCTGGCGGCGATGGTGCAGGCC  
GACTTGAGCGACGTACGCACCTATGACTTGGACGCGGCCGAGCGCATGCGCGAACG  
CATTCGCCGGATCATGCAGGCCAAAGATACATTGGGCGGGCGTGGTCGAGTGCCTGGC  
GCTTTCGGTGCCGCCGGGGTTGGGCAGCCATGTGCATTGGGATCGCCGGCTCTCGAC

CAAAC TGGCC GCGGCC GTGATGAGCATCCACGCCATGAAGGGTGTGAGATCGGTG  
ATGGATTTGCCGAGACGCTGTTGCCGGGTACGCAAGTGCAAGACCCGCTAGTTGTCG  
AGGACGGCGAGATTAACAGACCAGCAATCACGCCGGCGGGTTGGAGGGCGGCATC  
AGCAACGGCGCGCCGATTGTGGTGCGGGCCGCGTTGAAGCCGATTGCCACCACGTTG  
AATCCATTGACATCGGTGGATCTGGCGACGGGCGAAACCGTCGAGACCAAATACGA  
ACGCAGCGACTTTGTTTCAGGTGCCGCGCGCGGTGCCGATTGTGGAATCGATGATGCG  
GATTGTGCTGGCCGATGCGTTGCTGGAAAAGCTGGGCGGGCGACAGCGTGGATGAGA  
TGAAGCCGCGCTTCGAGACGTTGCGGGCGCATGCGGCTGGATCAGCTGCCGATGGACA  
ATGTGCCGTGGCGGCTTCTGACAATCCGGCCATCGCGCAATGTACAACTGGGCGTGG  
CCGTGGTGGTGTGATTGTGCTGACGGCCGCCACCTACGGCTACGTGGTCCGGCCTGC  
CCTTTTTCTCGATGATGTGATTCATTTGCGCTGGCTGCAACCCCGCGGCTTTGTGGA  
CATCTGGGATAGCGCCAAGATCCAAAGCTATTACCGACCAGTGCCGCTGACGCTGTG  
GAAGGCGCTATGGTTTGTGCTGGGTCGGCACGATGGGCCGGTGATGCACGCGATGAA  
TTTGGCCTGTCACGGGCTGAACGGCGTGCTGCTGTTTGTGTTGCTGAGATTGCGAGCG  
CCGGCCACGCAAACGTTTTGGGTTCCGTTGAGCGCGGCTGTGCTGTTCCCTGCTGTATC  
CGTTTAGTTATCAGGCCGTGCCGTGGGTCGGCTCGCTGTTTCATGTGCTGGTGTAC  
TGCCATTCTGGGCGCGCTGGTTGCGGCCTTGTGCGGCAGCGTGCGACGCCACGAGT  
TGCCTATTGCTGACGGCACTCTCGCTGGCCTGTGCGATGATCGCGATCTTCACGCAT  
GAAGTGGGGCTGGCCGTTGCGCCGCTGCTGATTCTGGTTTTGCTCACATCGGAGGCT  
GAAACACGATTGACCGGCCCTGCACTGTTGCGGGCGCATGTGGCCTTATGTGTTGATT  
GCGGTGTTGGGTGCGGCCGTGCTGGTTTATATGCGGCAGGGTGTGGGCAAATCCGGT  
GAGCTGGAAACCAATTTGGTCAATTGGGAAGCACGCTACCAGAACGCGGCTTACTTC  
TTGCAGGGACTGGCGTTTCCAGTTGCGCCGTTGGCCTTGC GGTTGAAACAGGCTGCG  
ATTGGCTTGGACGATTTGCAATCCATTTACGTGGTGTGTGGGTTGGCCACGCTGGTGT  
TGGCGGTGGGATTGGTTGTGGCCGGCCGTGGACGCGCGGTGGCACTGGCACTGGGTT  
GGTTTGTGATTTGCGCGGCACCGGCCTGGGCGTTGTTGCAGTTCAGCTATGTGATCGA  
TGGCCC GCGGCTGCTGTATCAAGCAGCGGCCGGCAGCGCATTGCTATGGGTGTTGCC  
GCTCAGCATTCCCTGGCGCAACACCATCGCCGGCCAGATCGGCAAAGCTCTCAGTGT  
CATCGTGGTGGTGGCTATTGCGGCCGGCAGTGTAGGCTTCTTGCAGTCCGCGCCGA  
GATGTATGCACAGGCCGATCACGCCGTGGATGAGCTACTGGCCATTGTGCCGTCGAC  
GCAAACGCGGCCGGCCATGGTAGTGAAC TCCC GCGCTGGCTGGCTGCGCCGCCGGT  
GTTGGAGTGGGGCACGAGGGCATTTCGATTGTGCCGGAATATGCCAGCTTTTTCGA  
TTATTACTGGACGCATACCGGCCACGAAGTCCCATTGATGATGTGGAGCTGGCCGA  
TCTGAAACGGGCGTGGCGCTATGACTATGTGGTGGCCGGCAAGCCGCGCAGCGCCG  
AGGATCTACAAAGCCGTATGCGCGAGGCCGAGCAAATTGTGATGACGGACATGGCG  
ATGCCGGATGTGATTGTTTACGATGCCGGCGCGCTCGAAGTGGTAAATGCGCCGCGT  
GCGTCGGATTGGCTGGCCGTCTATGACGAGAAAATTGCCTTATTGAGCGGGCGACTAT  
AAGATCGACTCAACTAGCGAAATGAGCGCAGTTTTAAAGGTCACGCTCAAATGGCA  
AAGCTGGATGACCCTGACCCAGGACGTGCGCACGTTCTGTGCATGTGCAGGCGGCCGA  
TGGCTGGATGGTGGCGCAGACCGATGGGTTGCCGGTGGGCAATCTGGCGCAGCCGG  
CGCGCTGGCAGGTTGGCGATCAGTGGCGGATACGACTGGTGCCGCTGCCGGCGC  
ATCTGGCTGCTGGCACGTATTTCGATTTCGCGCTGGTGTGTATTACGCGGCCGACGGGA  
AGCGATTGAGCGCGGTAAATTCACAGGGCGAAGCGATTGCCGACAATTCAGTTTTG  
TTGGAACAATTGAAATTCCTAG

>augustus\_masked-scaffold14309\_size6474-processed-gene-0.3-mRNA-1

ATGTTGCCAGATCCCCGTTTCCGGGATCATCAGTTTGGTATCCGGTCGTTCCGCCGTC  
GAGCGTCGATGGCGGACCTGGACCGCGTGACGGAGACCCCATGGAACTCTCAAC  
GAACTCTTTGAAGAACAACCTCAAGGACCTCTACAGCGCCGAGAATCAACTTCTCAAG  
GCGATGCCCAAGATGGCGAAGAAGGCTCGTCGGAGAAGCTCATCAAGGCATTTGA  
AGATCACCTGCGTCAGACCGAGCAGGTCGAGCGGCTGAAGAAGATTGGCGAGA  
GCCGCGACATCAAAC TACC GGCAAAGTCTGCGCGGCCATGAAAGGGCTGATTGAA

GAGGCCAGGAAGCGATGCAGGAAGGCGAGCCCGGCCGGTTCTCGATGCGGCACT  
GGTCGCCGACGCGCAGCGCATCGAGACTACGAGATCTCTGCCTACGGCACGGCGCG  
CACGCTCGCCGAGCACCTCGGCGACAAGGCCGCGGCCAGGCTTCTGGACCAAACGA  
TGAGGGAGGAGAGCGCAACGGACGAGAAGCTCACGAAGATCGTCGTGAGCGACGTC  
TACCCCAACGCGCCCGCGATGAGGAGGCGCTCGCGGCGGCGGACGCGTAA

>snap\_masked-scaffold5934\_size12884-processed-gene-0.13-mRNA-1

ATGTTGCCAATCGAAGATGAGTTGCGAGAGAGTTACCTGACGTATGCGATGAGCGTT  
ATCGTCAGCCGAGCTCTACCCGATGTTGCGGATGGACTCAAGCCCTCGCAGCGGCGC  
ATCCTGGTCGCCATGAACGACCTCAATCTTTCTCCCGGCGCTCATCGCGTCAAGTGCG  
CCAAGATCTCCGGCGACACCAGTGGTAACTATCACCCGCACGGTGAAGCGGTATCT  
ATCCGACGCTGGTTCGCATGGCTCAAGAGTGGAAACATGCGGCATGTTCTGATCGACA  
AGCAGGGCAACTTCGGTTCGATCGCTGGTCTACCGCCAGCTGCCATGCGTTATACCG  
AAGCGCGCTTGAGCCCGGCGGCGGCCATGCTGCTGGACGATCTCAAGCTCGACACGG  
TCGACTTCGTACCGACCTATGACGAGACTCGAAAGAGCCAGTCGTTCTGCCATCGA  
AGTTCCCGAACTTGTTGGTCAACGGTGCCACCGGTATCGCCGTCGGTATGGCCACCA  
GCATCCCGCCGCATAACTTGCGCGAAGTCTGCACGGGCATCATTTCGCGTTATCGATG  
ATCCCGATGTGACTATCGATGAGCTGATCGAAATCGTACCGGGTCCCGACTTTCCGA  
CCGGCGGTATCATTGTGGTTCGTTACGGTATCCATCAAGGCTATAAGACTGGCCGCA  
GCACGATTACACTGCGCGCCCGAGCGAGGGTTCGAGACAGTCAAGAACAAGTCTCGC  
ATCATCGTCAGCGAGATTCCGTTCCAGCAATTCCGCGATCGCGTCATCGAACGCATC  
GCTGCGCTGGCTCGCGACGAAAAGATCAAAGGCATCTCAGCCATTCGCGATGAGAG  
CGACTTGAAGGAACCAGTGCGCCTGGTTCGATATCAAGTCCAATGCCGATCCCGA  
AGTGGTGCTGAACCAGCTCTATCAGTTCTCGCCATTGCAGGATTCGTTCTCGATCATT  
TTCCTGGCTTTGGTTCGACGGCAAGCCGCGGAGCTGACGCTGAAGGAACTCATGCAA  
GAGTTCATTTCGGCATCGCGTTACGGTTCATTTCGCCGCCGCACACAGTTCTGTTAGATC  
GAGCGCGTCGCCGCAAGCACACCGTTCGAAGGTTTGTCTTTGGCGCTGGCCGATATCG  
ACGAAGTCATACGCATCATCCGCACCAGCTCCACTCAAGCCGAAGCCAAGGATCGAC  
TGATGGGCGTGGAAGTACCCGCCTCGATGATGCAGCGCGCGCTGGGTGATCGCGGCT  
ATGCCGACTTCCAACGCGATCGCGGCGTGGCCAGCGTGTACTCGCTGACTAGCGTGC  
AGACCGATGCGATTTTGGCCATGCGACTCGGTTCAGTTGGTAAACCTGGAACAAGACA  
AACTGGCTGACGAGCACTCGCAGCTCTTGAAGAGATCGAAGGTTACCTGACGATCC  
TGTCGACCCAAAGAACATCACCGATATCATCAAGAGCGAACTCGAAGAGATCAGC  
CGTCGCTTCGGCGATGATCGCCGCACCGAAATCAGCGGCGAAGAGCTGGGCAATTAC  
AACTTGAAGATCTCATCACCGAAGAGACCATGGTGGTGACGATCAGCCATAACGG  
CTACATCAAGCGTATCCCGGCTACGACCTACCGCGCGCAGCGCCGCGGCGGTAAGG  
CATCACTGGTGCCAAGACGGAGGAAGAAGATCCGATCGAACACCTGTTTCGTTGCCAG  
TACCCACGCTTACCTGCTGTTCTTCACTAGCCAGGGCAAGGTCTATTGGCAGAAGGTT  
TACGACATAACCACAACCTGTCTCGCGAAAGCCGTGGTTCGAGCCGTGGTCAACCTGCTC  
AACCTCGCGCCCGAAGAGAAGATCGCCGAGTGCCTTCGGTTCGCTGACTTCAATTTG  
CCTGGACATTTCTTGGTTCGATGGCCACGAAGAAGGGGCTCGTCAAGAAAACGCCGCTC  
GATCAGTACAGCCGTCCGAAGAAAGGCGGCATCATCGCGATCAAGTTGAAAGAAGA  
TGATGCGCTGGTTCGATGTGGTAGTGACCAAGCCCAACGATCAATTGCTGCTGGCAAC  
CGCCGAAGGCAAAGCCATTTCGCTTTCGAGAGACCGATGTGCGTTCGATGGGACGCAA  
TACATCGGGCGTGAAAGGCATTTCGCTTTCGCAAGAACGATGAACTGGTCGGCATGGT  
GGTGGCTGATCCGGCTACGACCCTACTGACCGTTTTCGAATTGGGTTACGGCAAGCG  
TACCTGGTTTTGGTTCGGGTGAAGTGTTCGGCGCCGCTGCCGGAACCGGAAGAAGGCG  
AAGATGCAGATAACCTGCCGAGGCCATTGCCGAACCGGAACACCAGAAGCACCG  
GAAGCAGAAGCCGAAGGTGCCGATGAACCCAACAGCGCCAACCTCTATCGAACTCA  
GCGGCGTGGTGGCTCGGGCTTTCGATCGACATCAAGACCAGCAAGCGCAATGGTTCGCGT  
CGTCGGTTCGTCGCCGTAAGCGATGAAGATGAACTGCTGATGATGACCACGCGCGG  
CAAGATTCAGCGGTGGCTGCCAACGAATCAATATCATCGGCCGCAACACCCAAG



GCGTGAAGATCATGCGGATGGACGAAGGCGATACGCTCGCGGCTATCGTCAAAGTG  
CCTAAAGAAGATGATACCACCGTCGCCGAAACCATAGCCGCGCTACCACCAGTAACC  
CCGCCTCCCGTCGCCGCCGAAGACATCAATCCGGAGGAGCGGTGAGGAAGAGGA  
GTGA

>maker-scaffold25141\_size2260-snap-gene-0.2-mRNA-1

ATGTTGCAGTCAACATCGGAAACTTTCCCAATGGATTTGCCAACAGCAGTGGTGTA  
TTGGGTCATTACCTGATGGATCATATCTCTGGTCCGGGAGCTGCCGCCGTTTTGATA  
TATTGAAGGATGAATATTATTTCCGGCAGCGTTCACATCAGTATATATAACCGCGTTT  
TCAAACCTGCAAAGACAGGACAAAAAATATAAGAGAGGATTTGCTTATGAAGTAT  
ATGTATCACGCGCAGAATGGACGAGAGGATATAATGGCCCCGGTGCGGGCGATGCA  
TGGAAGGATTCATTGAGTGAGCCCCGGCGACTGGCAGGCGAGTATGTTTGCCTATGGT  
GAATGCCTGCCCGATGTTAAGAACCGTGCATATTTGCATCCCAAAAAAAGACAAA  
TGGGGATTGCCTTTGCTAAGTGTGACATGGAATACGGGGAGAATGAAAATGCGATG  
AAAGAAGAAATGATCAACGCTGCCAAAGAAATGCTGAACAGCGCCGGCCAAAATG  
GGTGGCAGCAATTAATGATCCATCAATACCGGGAAACACCATACATGAAATGGGCA  
CAGCACGCATGGGCCACGATCCCAAAACATCGGTACTGAATAAATTCAATCAGTGCC  
ACGATGCACCTAATGTATTTGTGACAGATGGCGCCTGTATGGTATCAACTGCCTGTC  
AAAACCCATCGCTCACTTATATGGCACTCACCGCAAGGGCAGTTGATTATGCTGTGC  
AGCAACTGAAGAAAGGATGGAAGGAAGTATTGAAACAGGAATTTTCAAAGCCATAT  
TTTTTACAAATCGTGACCTTTCTGCGTACGGAAAAAATGGCCGGAAAAACCATTTAT  
CCGCCGGGCGAGTCAAATATTCAATGCTTTTGATACAACCTCCCTTTGATCATGTA  
TTGTGTTACTGGGGCAAGACCCCTATCACGGTCCGGGACAGGCACATGGATTGTCTT  
TTCCGTTTCAAGATGGCGTTCCCTTCCCTCCATCACTCATCAATATCTTTAAAGAACT  
GCACGAAGATAGCGGTGTTCCCATCCCGAATCATGGCAACCTGACTCATTGGGCGCA  
GCAGGGCGTGATGCTGTTAAATGCCTCCTTAACGGTTCGCGCCAACGAACCGATGAG  
CCATGCAAAGATTGGCTGGGCAGAAATTTACTGACGGCGTTATAAAAAAATATCGCT  
GCAAAGAAACATATCGTTTTCTGTTATGGGGAAAATTTGCACAGGAAAAGCAGGC  
GTCATCGATGAAACAAAACACCTTGTGCTGAAAGCAGCGCATCCATCACCTTTTTT  
TGCGTTCAATGGTTTTCTCGGTTGTAGGCATTTTTCTAAAACCAATGAATACCTTGTG  
AAAAATGGAATCGATCCATTGACTGGAAACTCTGA

>snap\_masked-scaffold3665\_size17370-processed-gene-0.21-mRNA-1

ATGTTGCACCCGTGTTACCCCGTCCATTCGTCCGGTCCCATACTGGCCATGCTATGTGT  
GTGCAGCAGCACAGCGCGAAGCGCCGGGCAAGCACGAGGGAAACGGAACCTGGCAT  
GAGCAAGAGCAGTGATCCGAAGATCGAGGTGATCTTCTCCGCGGAAGCCATCGCAC  
AGCGCATCGAGGCGATCGCCGGGAGATTGCCGGCTCCGGCATGGACCAGCCGCTC  
GCCATCGCCGTGCTGAAGGGCAGTTTCGTATTCGCCGCAGACCTGATTCGCGCCCTTC  
ATCGGGCCGGCCTTTCCCCAGAGGTCGACTTCATCACCTGTCCAGCTACCGCACGG  
CTACGACCTCGTCCGGAACCGTTGAAATCCTTCGCGATATCGAGAGCGAGGTGAAGG  
GCCGCAACGTGCTGCTGATCGACGATATCCTCGAGTCCGGGCGCACCTGGCCTTCG  
CCAAGGATCTGATCTCGGCGCGCGGTGCTGCCAAAGTGCGCACCTGCGTCTCCTCG  
ACAAGGCCACACCGCGAGCCGTCGATATATCTGCGGATCACCACGTGTTTGATTGCC  
CGGCCGGCGTGTTTCGTGATCGGCTACGGCATGGACATGGCGCATCGATTCCGCGAGC  
TTCCCTATGTCGGGCGCGTTGTGGAAAGCTGA

>maker-scaffold20841\_size3522-augustus-gene-0.9-mRNA-1

ATGTTGCAACCAAAAAGACCAAGTTCGCAAGCAGTTCAAGGGCCGGATCAAGGG  
CGATGCCAAGGGCGGCACCACCCTGAACTTCGGTTCCTACGGGCTGAAGGCTCTGGA  
ACCCGAGCGCGTCACCGCGCGCCAGATCGAAGCCGCGCGTCGTGCGATCACCCGTCA  
CATCAAGCGTCAGGGTTCGTCTCTGGATCCGCGTGTTCCCCGATGTGCCCGTGTGCAA  
GAAGCTGCCGAAGTCCGTCAGGGTAAGGGCAAGGGTTCGGTCAATACTGGGCGG  
CCAAGGTGAAGCCGGGCCGCATCCTGTTTGAACCTCGACGGCGTGGCCGGCCCGCTGG  
CCGCCGAAGCCTTCGAGCGTGCAGCGATGAAGCTGCCGATCAAGACCAAGGTTACC

GATGACCAGCTGGTCGCCGAGCTCACCGAGCTCAAGCGCGAGCAGTACAATCTGCG  
GTTCCAGGCTGCGACCAACCAGCTCGAGGCTCCCTCGCGCATCCGTCAGGTGCGCCG  
GACCATCGCGCAGATCAAGACGCTGCAGAGCGAGCGCGGCCAAGGCCGCCGCCG  
CCAAGGCGTAA

>snap\_masked-scaffold1298\_size28737-processed-gene-0.13-mRNA-1

ATGTTGCAAACCATCGTCACGCAGGCTGGCGCCGTATTGTCCAGGCCGCGATGGGA  
TTGGGAGTGGCCACTTTGGTGGCTTGTGGTGGGGGGGGCGGAAGCGCTGGCGATTTCG  
GTGTTCCCAGGTGGAGGCAGTGGCGGTAGCACTAGCGGCTTGACGGCTCTGTCCGTG  
ACCGGCAACCCACGCTGCCAATAGCAGTACCGATCCGCTACCCTGACCGTCACT  
GCGCTCGGTGCGGAAATACTGCCTTGATCGGCGTTACAACGCCTGTCGAATTTACG  
GTCAGTAGTGGTGTCTTGACGCCATCGGCCAAGACTACGTCTGCTACTGACGGG  
AAGCTCACTGCTACCGTAAGCCTTACGGATCGGACCAACCGCACGGTCACTGTCCT  
GCGACAAGCGGCAACATCAGTCAGACCTTCAAATTCGATGTCTGATAGACAGCGTGACC  
GGCAGCAAGGTGGCGGACATTTTCGCTGGTGGCGGGGAGCCCAACGCTGCAGAACGA  
TGGCGCAACGACTGTGGCAATCACTGCGACCACGTTGGATTCCCTGCACAGTGCAAT  
CGGTGCGGTGCCTCTGTCTGTTTTCTGTGGATGACCCTGCCAATTCTGCCTTTGTCA  
GCTGCTGGCGGCGCTACGACGACTAATGGCACCACCGGACAACCTGGGTGCAACGCT  
GTCCATCGGAAGCAATAGGTCTATCCGTACGATCAAAGTTAACGCTACCAGCGGCAC  
CGTGACGCGGTCTGTTGCAGTAGACGTTGTGGAATCAACGGTGGTCACACCGGTTGC  
TGCCGACATGACGATCAGCCTTAGCAAGGCGACGGTTGGCAACTCCGGCCTGAACGA  
GCCTGTCAGTGTGTTGTGACGGCAGTGGATGGCAAGCGCAATGCTGTGGCCGGCAT  
CGATGTCAGTTTCAGCGTTGATGCAAACGCCGTCTTGACTGTTGGCAATTCGAAGAC  
TGCAGTTGACGGCACGGCTAAGGCGACAGTGACTATCGGGCGCCGACCGGTCTAACCG  
GGTGGTCACAGTGACCGCAAAAAGTGGCTCCTTTACCGGCCAGGCCTCTTTCCGAGT  
AACGGGCTCCAAGTTGCAGGCCACTCTGCTGCCGCAACCCTGAAGGCCGGTGA  
AGGGCCAAGTTCAGTACACGCTGACGGACGTCAACAACAGTGCGATGGCTGACTAT  
GCCGTGACGATATCGGGACCGGGTGCCTCGGTGGGGACGTGTATTGACAGCGCTGCG  
GCAACCGTGCCTGCGTCACTGATGGCCGTGGCCAGGTGACCTACTCTTATGTTGCTG  
CGGGGTCTGGCGCCACTTCAGTCCTCGCAGCTGCCGGGGGCGTGACGCTGACAAGCA  
CAGTGCAGATTGACGCAAAGCTGTCTGATGTGCCGCTGCTACCGACATTGCCTCTG  
CGACGTTACGGTGGCCCTTCTGTGGTTAGCGTGAATGCGGTTGGGTGCGAGGGACA  
ATCAGGCTGAATTGAGGCTTCTTTTCTGACAGACAAGAGCGTGCCGGTGGCCGAACG  
TGGGAGTGAGACTTGGTCTTGGCGCCAATTTGGCCGTTCTGACGGTGTGATTGGAT  
CTGGAACCAAAAAGTACTGATGAGATTTTGGTGACTTCAGATGCCAACGGCGTGGCAG  
TCTCTAATTTTCATCGCGGGCCAACGCGCCAGCGCAACAGATCAAGTCAAGGTCTACG  
CGTGCTATGCGAAGGATGACAGTGTGAGTCAATCGCTGCCTGCCCTGACGCGCGGA  
AGCGTGCAGTGTGCTGACGGTGTGCGAGCAACCAGTGTCCATCTCCATTGGTACTG  
ACGAAGGCATCGTCGATGGCACAACGGGTTGACCTACATCCAGCGATTACGGTGC  
TGGTGGTAGATACAGCTGGTAATCCCAAGCCGGACGTCCAGTTGTGCGCCATTGCTTG  
ACCTGCCGAGCTATCGGAAAGGCATCTGGATTTACAACGATGGCTTGAAGCTCTGGG  
GGCAAAGTGTCACTGCGACGTGCCTCAATGAAGACAGCTCACCAACGGCTTCCGCA  
ACGGCACAATCGAAGTCTTCAATGGCGTTTCGGAGGACGTCAATGGCAACGGCCAAC  
TCGACCCGCGCAAGTCTGACGTGTGAGTGTGCGCTGGTTGGCAGTACCAAGACTGATG  
CTAATGGCACCGCTGTCTGCGTATCGAATACCCCAAGAATTTGGCGGGCTGGACGG  
AGTTCGCCATCCGTGTAAGCGCTTCGGGCGTTGTGAGCCACCGGCTTGGTTCGGAC  
GTATCGGACTGCAAGTGGCAGTTTGATTGGTACTGCGATGTTCACTGGCGTTCCTAT  
CGAAGTTGTGAAGAGCGAGGGCAAGCCGCCCTTCCGAGATAGCCCTACGGGGGGC  
TAGGCTCCTGCACGAGTCCCGACTGA

>maker-scaffold17\_size272228-snap-gene-1.193-mRNA-1

ATGTTGCAAAAACACCGCCATTCCTCACCATCAAGACTGGGTTCTTGTCTGTCCGTTGC  
CAAAATGTGACTTTGCAACGCTAGGCGCAGATTTGACGCAATTAACAGGAGAGGC

ACGCAATTGGGTTCGGAGGATCGGCATCTTCTTAGTTCGCTGTTATCAGCGTGGTTTTG  
CTTGGATGCCGCAACATGTCGGTTTAATCCGAGTTGCTCCCAATACACATTGGAAG  
CGATCGATAAATACGGGCTAATGAAAGGATCGTGGATGGGTTTGAAAAGAATCTGTC  
GATGCGGACCTTGGCATCCCGGTGGCAATGACCCCGTACCTTAG

>snap\_masked-scaffold7882\_size10609-processed-gene-0.7-mRNA-1

ATGTTGATGGCAGTGATCTGCAGCTTTTCTCAAGTCGGCCAGGCACAAGACCAGGAC  
CGAGCCCCGATGCTAAATGCATTTGGGAGATTTTGGGAATCGGCTACAGCGCTGGT  
AATCATGCTCGAACAGAAAGCCGTTTTGGATTGCATCGGTATGTGCCCGACCACAAT  
GTGGTAGCTGAGCCGCCCGTGGCATGTACGCTAATCCCAATCTTTACACGCCTCGC  
GGCACATACGGCCAAGGCAATTCGGGCGGCTATGGCCATGCACCCGTCATGGCTTCC  
GGTCTGCCCGGTATGGCTCCCGCGCCTGCCAGCACATCGCCTGCCAAGCCTGTTGAA  
CCGCCGCCAGTTGGCTCAAGCAATACATGAAGCCAGGCGACACCGACAGCTCAA  
GGCCGATGATCTGCTCAATGAAGAGTCGCCAGCGATCGCAAGAAAGCCATGATGTC  
GCCTGCGCCGGTCGACAGCACGACCAGTCTTTCCATCACACCAGCTCAACCGCCCAT  
CCAAATCGGCGGTCGACCTGTCATATCGGTGCTGCAGCACGGCCCTCAAGCAGCAGG  
GGACTGCTGCTCTACTATCAGCTGCTACAGCGCTGCGAATATCGATTGCCTGCGAGG  
AAATATCGGGCGAATCGGGCGGTTTTGGGCTTAGTTGTTTAGCGGCCCTTAAGCAGCA  
GGGGACTGCTGGTCTACTATCGCAGGACTGCCGCTCTACTTTCTGCTCCCTCTTCGCG  
CCGAGCGTCTGTAAGGCAACAATCCTAGGCTAACAGGTGTGCAGGCTTTCAGCCAG  
CACTGCGTATTTTGTGCGCCCCCTTTTTGTGCGGAGATTCGCCTCATGTTGGAGCGTT  
CGCTCGTTTTGCTGAAACCGGATTGCGTTGAACGGCGTTTTGATGGGTCAGATCATTGC  
CCGATTCGAAGCCAAAGGCTTGAACATTGTCGGTGCCAAGATGCTGCGCGTCACACC  
GGAACTCAGCAAGCAACTACGCCGAACACGTGGCCAAGCCCTTCTACAAGAGTCT  
CGAAGACTTTATTACGGCTTCGCCAATTATGGCGCTGGCCATCGAAGGACTAGATGC  
GATCCGCGTGATTGCGGAAATGCTGGGAGCGACCAACGGCTTGAAGGCTGCTCCAGG  
CACCATCCGCGGCGATTTTTCTAGCTCACGACAAATGAACCTCGTCCATGCTTCCGAC  
AGTCCAGAGAGCGCTGCTCGGAACTGGCCCTTACTTCAAACCGGAAGAAATCTGC  
GAGCATGAGTTGCGTTTGACACCGTTCTTCCGCGCTGCGGACGAATAG

>snap\_masked-scaffold198\_size62889-processed-gene-0.14-mRNA-1

ATGTTGATGCTTCCGAAACTGAAAAGCGGAAAGAGAAAGTTCTCCAGTTTCTCGAC  
TTTGAAAAACCTATCAAAGAACTATACGACCAGATCGAACAACCTGAAAATAACTTCC  
GAAAAGTCGAAAACCAATATGAGCGGCGCTATTACCATGCTGGAAGAGCGCATTGT  
GGAAACCAAAAAACACCTTACTGCCAATGTTACTCCCTGGCAAAAAGTACAGTTAAG  
CCGCCACCCGACAGGCCTTACACCCTCAAGTACATACAGAACATGTGTACCAATTT  
TATGGAACACTACATGGCGACCGGAATGTGAAGGACGATAAAGCCATGGTGGGCGGAT  
TTGCACAATTAGATGGCGAAACAGTTATGATCATTGGTCAGCAAAAAGGCGCCAATA  
CCAAAACCAGGCAGTTACGCAATTTTGGTATGGCCAATCCTGAGGGATACCGCAAGG  
CACTCCGGCTGATGAAACTGGCAGAAAAATTCAATAAACCCGTTATTACCTTAATTG  
ATACCCCGGCGCCTTCCCCGGCCTGGAAGCTGAGGAACGTGGACAAGGCGAAGCC  
ATTGCACGTAATATATATGAGATGATCAGGTTGAAAGTGCCTGTTATCTGCGTTATCA  
TTGGCGAAGGCGCCAGCGGTGGTGCATTGGGCATTGGCGTAGGCGACCGTGTATTTA  
TGATGGAGAATACCTGGTACACCGTAATTTCTCCCGAAAGCTGCAGCAGTATTTTAT  
GGCGCAGCTGGGATAAAAAGGAAACCGCAGCAGAGCAGTTGCGCCTTACCGGCGAA  
GACATGCTGGGCTTTGGCCTGGTAGATGGTGTATTAAAGAGCCATTGGGTGGCGCC  
CACTGGGATTACCAGGAAGCTGCCGATATTTTAAAAGCCTACCTGCTGCCTGTTATTA  
AAGAACTAAAACAATTGACGCTGATAAAAGAGTGAACAGCGCATTGAGAAATTC  
GGCAAAATGGGTTTCTGGGAGGAAAGACCCCAAACCGCTGAAGGGGCTTTAGAGTA  
A

>snap\_masked-scaffold1040\_size31561-processed-gene-0.16-mRNA-1

ATGTTGATGATGCCGAAGAAGTATGCGTTCGTAAGTTGGCGAAGAGAGGACATAG  
AAAAGGATCGGTGTCCACGACGTTGAGGTATGGAACGAGCGGGTTGTTGCTGCGA

AGAAGGATATGTGACGGCTCGGCAGTTGGAGGCGGCTCGTCGTGCGATTTCGACGGA  
CGATGAAACGTGCGGGGAAGTTGTGGGTTCGTGTATTCCCGAATCGACCGGTGACCA  
AGAAGCCGGTAGAAGTTCGTATGGGTGGGGGTGCCGGGTCGATTAATAATTGGGTGCG  
CGGTGGTCAAACCGGGGACGATGTTGTTGAACTGGGAGGAGTTCCTACCGCGATGG  
GAAGTTGGCGTTGCATCGAGCACAGGTGAAGTTGCCGGTAACCTGGTTTGTGCTGG  
TGTTCTCTGTTTTCTATTTGGTGATGTTGACGACGTTCTTCCTGCGTTGAATCGTGCA  
GTGAAGGTTTCGTGCGAAAAGATTGGACAGAGTTCGCGGGGATGCTCGTCAGTTTGAC  
GGGTTGAGCGTGTCTGCCAAGACTCGGTGGATGCTACGTTGTCGTCAGGATCGAAA  
GGGGTGACGGGCGTAGTGTGAGGAGCAGCGAATGGGGTGGTGTCTCGCCTTCGTTT  
GTGGCTCGTGGACGTAGGGTTCGTGCCGGGTCATAA

>maker-scaffold152\_size70078-snap-gene-0.57-mRNA-1

ATGTTGATCTTCGGAAGACAGTTCCTTATTGGTATCAGCTTTGGAATTTGTTATTTATT  
GGGTTGTTTCGTTAGCCTACGACGGTAACTCCTATCAACCGTCTAGCCCACCCACTGTT  
TACATTCATGATTCCCTCCTTTCATCCCGATCGAATCCTCCGCGTGACCACACAAGTTT  
ACCCACTCGACTGCACAACGCGCTATTCGGTGGTAATCAATGGCTCCATTTCCTGGGC  
CGAACTTCGTTTTTCGAGAGGGGCGATAAAATCTGGATTTCGCGTTTATAATGACATTA  
AGGATGAAAATTTGACCATTCACTGGCACGGTTTAACTATGCGCATGTGCGCCTTTTTC  
TGATGGCACGCCAGCTGCAAGCCAGTGGCCGATTCCGCCCATGCATTTCTTCGACTA  
CGAGTTCGAGCTTCAATCCGGTGTATGCAGGAACCTACTTTTATCATTCTCACGTTGGT  
TTCGGAGCAGTGACTGCATATGGAGCACTGATCATCGAAGAGCGGGTCAAGGACTC  
ACCACATTTGTCTACGACGACGAAAGAACCCTTGTGCTCACAGACATATTTTACCG  
TAACGACTCAGACATCGTTGGAGGTTTAAATGGGCGACCCATTTCTGTGGTCCGGTGA  
GACGTTCAACGTCGCTTTAAACGGTCACTCTCGCTCTCCAAACGCAACGGCCGATAA  
AGAAAGCACATCTTGTTTCGTACGGTGTGCTCACCGTTAAACCCAGCACCACTACAG  
ATTCGTTTTATCGGTGGAACCGTTCTCTCTCACGTGTTCTTCGCATTTGAAGGCCAC  
GGTTCGATGACCGTTATTGAGGTCGACGGCCACTACGTCTCACCAGTTGAGGTGGAT  
CATATTGAAATCGGCTCCGGACAGCGTTTCAGCGTCCTCTTCAAATCCAAATCCATCG  
AAGAGCTGTCCGTCGATCGCATCAACGGAAAAGACCAATACTGGCTTCAGATGGAG  
ACACGGACTCGAGCTCTCATCACTGTGTCATTTGCTGTTTTGGCTTATAGTGATGCAG  
ACATACCGGATCGCTTCACCAAACCGACAACACCACCCTTGCTTCTACCGACTGAGT  
CTTTCACGTCAGGCTGGTTGGAGGACGAGCTCTGGCCGCTTCCGTCTCGCCCTTATGA  
TGATAGCTTCCCCAAGCGTCAGAAGTAACCCGGAGGATATTTATTAACGTCCAACA  
GAATTTCAATGTTAATGGGACAAAGAAAGTGATGTGGCATCAGAATGGGGCGCCTTG  
GTTTGAGAACAGCGTCCAGAACCCTACCTGGTGTGCTGTATAAGAACTCAAAGAG  
TGCCTTTCCTGATTACGAAAACGTTTTGAAGCACGGAGGCTACGACACGAAGACTAA  
GACCTATCCAGCCAAGCTGGGGGAAGTGCTGGAAATAATTTGGCAAACGTCGGCA  
ACACCCAGTCCGGCACGGTGGAGACGCATCCGTTCCATGCGCACGGCGACCACTACT  
GGGACGCCGGATGCGGGACGGGACGTTACAGCGAAACCGTCGCCGAAGCCATGCTG  
CAAGATCGAATGCGATACGGCGGACCCATCAAACGCGACACAACCAACTTGTACCG  
GACTCCGCTGCCACCACCACGACACCGGGAGCGATTGTCAGCTGGAGAGCTTGGCG  
GCTGCGAGTGCGAAATCCCAGGAGTGTGGATGGTACATTGTCACATAGTACAGCATAT  
GATGATGGGCATGCAAGCGGTCTTTGTCTTCGGGGGAAGAACGACCTCAAACCCTT  
GACGAAAGAACAGGCCGCCCTGTATCTTGAGTTTGGTGGGCAGGCCTATGGAAATGC  
TACTTACAGTCCGAGAGTTGTACATTTCTGGCATGATTAA

>maker-scaffold2255\_size22147-snap-gene-0.17-mRNA-1

ATGTTGATCTTCGGAAGACAGTTCCTTATTGGTATCAGCTTTGGAATTTGTTATTTATT  
GGGTTGTTTCGTTAGCCTACGACGGTAACTCCTATCAACCGTCTAGCCCACCCACTGTT  
TACATTCATGATTCCCTCCTTTCATCCCGATCGAATCCTCCGCGTGACCACACAAGTTT  
ACCCACTCGACTGCACAACGCGCTATTCGGTGGTAATCAATGGCTCCATTTCCTGGGC  
CGAACTTCGTTTTTCGAGAGGGGCGATAAAATCTGGATTTCGCGTTTATAATGACATTA  
AGGATGAAAATTTGACCATTCACTGGCACGGTTTAACTATGCGCATGTGCGCCTTTTTC

TGATGGCACGCCAGCTGCAAGCCAGTGGCCGATTCCGCCCATGCATTTCTTCGACTA  
CGAGTTCGAGCTTCAATCCGGTGATGCAGGAACATACTTTTATCATTCTCACGTTGGT  
TTCGGAGCAGTGACTGCATATGGAGCACTGATTATCGAAGAGCGGGTCAAGGACTCA  
CCACCATTTGTCTACGACGACGAAAGAACCCTTGTGCTCACAGACATATTTTACCGT  
AACGATTCGGACATCGTTGGAGGTTTAATGGGCGACCCATTTCTGTGGTCCGGTGAA  
ACGTTCAACGTCGCTTTAAACGGTCACTCTCGCTCTCAAACGCAACGGCCGATAAA  
GAAAGCACATCTTGTTCGTACGGTGTCTCACCGTTAAACCCAGCACCACTACAGA  
TTTCGTTTTATCGGTGGAACCGTTCTCTCTCACGTGTTCTCGCATTTGAAGGCCACG  
GTTTCGATGACCGTTATTGAGGTCGACGGCCACTACGTCTCACCAAGTTGAGGTGGATC  
ATATTGAAATCGGCTCCGGACAGCGTTTCAGCGTCCTCTTCAAATCCAAATCCATCG  
AAGAGCTGTCCGTCGATCGCATCAACGGAAAAGACCAATACTGGCTTCAGATGGAG  
ACACGGACTCGAGCTCTCATCACTGTGTCATTTGCTGTTTTGGCTTATAGTGATGCAG  
ACATACCGGATCGCTTCACCAAACCGACAACACCACCCTTGCTTCTACCGACTGAGT  
CTTTCACGTCAGGCTGGTTGGAGGACGAGCTCTGGCCGCTTCCGTCTCGCCCTTATGA  
TGATAGCTTCCCCAAGCGTCAGAAGTAACCCGGAGGATATTTATTAACGTCCAACA  
GAATTTCAATGTTAATGGGACAAAGAAAGTGATGTGGCATCAGAATGGGGCGCCTTG  
GTTTGAGAACAGCGTCCAGAACCTATCTGGTGTCTGTATAAGAACTCAAAGAG  
TGCCTTTCCTGATTACGAAAACGCTTTGAAGCACGGAGGCTACGACACGAAGACTAA  
GACCTATCCAGCCAAGCTGGGGGAAGTGCTGGAATAATTTGGCAAACGTCGGCA  
ACACCAGTCCGGCACGGTGGAGACGCATCCGTTCCATGCGCACGGCGACCACTACT  
GGGACGCCGGATGCGGGACGGGACGTTACAGCGAAACCGTCGCCGAAGCCATGCTG  
CAAGATCGAATGCGATACGGCGGACCCATCAAACGCGACACAACCAACTTGTACCG  
GACTCCGCCTGCCACCACCACGACACCGGGAGCGATTGTCAGCTGGAGAGCTTGGCG  
GCTGCGAGTGCGAAATCCCAGGAGTGTGGATGGTACATTGTCACATAGTACAGCATAT  
GATGATGGGCATGCAAGCGGTCTTTGTCTTCGGGGGAAGAACGACCTCAAACCCTT  
GACGAAAGAACAGGCCGCCCTGTATCTTGAGTTTGGTGGGCAGGCCTATGGAAATGC  
TACTTACAGTCCGAGAGTTGTACATTTCTGGCACGATTA

>maker-scaffold2400\_size21539-snap-gene-0.15-mRNA-1

ATGTTGATCTTCGGAAGACAGTTCCTTATTGGTATCAGCTTTGGAATTTGTTATTTATT  
GGGTTGTTTCGTTAGCCTACGACGGTAACTCCTATCAACCGTCTAGCCCACCCACTGTT  
TACATTCATGATTCTCCTTTCATCCCGATCGAATCCTCCGCGTGACCACACAAGTTT  
ACCCACTCGACTGCACAACGCGCTATTCGGTGGTAATCAATGGCTCCATTCTGGGGC  
CGAACTTCGTTTTTCGAGAGGGCGATAAAATCTGGATTTCGCGTTTATAATGACATTA  
AGGATGAAAATTTGACCATTCACTGGCACGGTTAACTATGCGCATGTTCGCCCTTTTC  
TGATGGCACGCCAGCTGCAAGCCAGTGGCCGATTCCGCCCATGCATTTCTTCGACTA  
CGAGTTCGAGCTTCAATCCGGTGATGCAGGAACATACTTTTATCATTCTCACGTTGGT  
TTCGGAGCAGTGACTGCATATGGAGCACTGATTATCGAAGAGCGGGTCAAGGACTCA  
CCACCATTTGTCTACGACGACGAAAGAACCCTTGTGCTCACAGACATATTTTACCGT  
AACGATTCGGACATCGTTGGAGGTTTAATGGGCGACCCATTTCTGTGGTCCGGTGAA  
ACGTTCAACGTCGCTTTAAACGGTCACTCTCGCTCTCAAACGCAACGGCCGATAAA  
GAAAGCACATCTTGTTCGTACGGTGTCTCACCGTTAAACCCAGCACCACTACAGA  
TTTCGTTTTATCGGTGGAACCGTTCTCTCTCACGTGTTCTCGCATTTGAAGGCCACG  
GTTTCGATGACCGTTATTGAGGTCGACGGCCACTACGTCTCACCAAGTTGAGGTGGATC  
ATATTGAAATCGGCTCCGGACAGCGTTTCAGCGTCCTCTTCAAATCCAAATCCATCG  
AAGAGCTGTCCGTCGATCGCATCAACGGAAAAGACCAATACTGGCTTCAGATGGAG  
ACACGGACTCGAGCTCTCATCACTGTGTCATTTGCTGTTTTGGCTTATAGTGATGCAG  
ACATACCGGATCGCTTCACCAAACCGACAACACCACCCTTGCTTCTACCGACTGAGT  
CTTTCACGTCAGGCTGGTTGGAGGACGAGCTCTGGCCGCTTCCGTCTCGCCCTTATGA  
TGATAGCTTCCCCAAGCGTCAGAAGTAACCCGGAGGATATTTATTAACGTCCAACA  
GAATTTCAATGTTAATGGGACAAAGAAAGTGATGTGGCATCAGAATGGGGCGCCTTG  
GTTTGAGAACAGCGTCCAGAACCTATCTGGTGTCTGTATAAGAACTCAAAGAG

TGCCTTTCCTGATTACGAAAACGCTTTGAAGCACGGAGGCTACGACACGAAGACTAA  
GACCTATCCAGCCAAGCTGGGGGAAGTGCTGGAAATAATTTGGCAAACGTCGGCA  
ACACCCAGTCCGGCACGGTGGAGACGCATCCGTTCCATGCGCACGGCGACCACTACT  
GGGACGCCGGATGCGGGACGGGACGTTACAGCGAAACCGTCGCCGAAGCCATGCTG  
CAAGATCGAATGCGATACGGCGGACCCATCAAACGCGACACAACCAACTTGTACCG  
GACTCCGCCTGCCACCACCACGACACCGGGAGCGATTGTCAGCTGGAGAGCTTGGCG  
GCTGCGAGTGCGAAATCCCGGAGTGTGGATGGTACATTGTCACATAGTACAGCATAT  
GATGATGGGCATGCAAGCGGTCTTTGTCTTCGGGGGAAGAACGACCTCAAACCCTT  
GACGAAAGAACAGGCCGCCCTGTATCTTGAGTTTGGTGGGCAGGCCTATGGAAATGC  
TACTTACAGTCCGAGAGTTGTACATTTCTGGCACGATTA

>maker-scaffold6531\_size12050-snap-gene-0.10-mRNA-1

ATGTTGATCTTCGGAAGACAGTTCCTTATTGGTATCAGCTTTGGAATTTGTTATTTATT  
GGTTGTTTCGTTAGCCTACGACGGTAACTCCTATCAACCGTCTAGCCCACCACTGTT  
TACATTCATGATTCCCTCCTTTCATCCCGATCGAATCCTCCGCGTGACCACACAAGTTT  
ACCCACTCGACTGCACAACGCGCTATTCCGGTGGTAATCAATGGCTCCATTCCCTGGGC  
CGAACTTCGTTTTTCGAGAGGGGCGATAAAATCTGGATTTCGCGTTTATAATGACATTA  
AGGATGAAAATTTGACCATTCACTGGCACGGTTAACTATGCGCATGTCGCCCTTTTC  
TGATGGCACGCCAGCTGCAAGCCAGTGGCCGATTCCGCCCATGCATTTCTTCGACTA  
CGAGTTCGAGCTTCAATCCGGTGTATGCAGGAACATACTTTTATCATTCTCACGTTGGT  
TTCGGAGCAGTGACTGCATATGGAGCACTGATTATCGAAGAGCGGGTCAAGGACTCA  
CCACCATTTGTCTACGACGACGAAAGAACCCTTGTGCTCACAGACATATTTTACCGT  
AACGATTCGGACATCGTTGGAGGTTTAAATGGGGGACCCATTTCTGTGGTCCGGTGAA  
ACGTTCAACGTCGCTTTAAACGGTCACTCTCGCTCTCAAACGCAACGGCCGATAAA  
GAAAGCACATCTTGTTCGTACGGTGTCTGTCACCGTTAAACCCAGCACCACTACAGA  
TTTCGTTTTATCGGTGGAACCGTTCTCTCTCACGTGTTCCCTCGCATTTGAAGGCCACG  
GTTTCGATGACCGTTATTGAGGTCGACGGCCACTACGTCTCACCAAGTTGAGGTGGATC  
ATATTGAAATCGGCTCCGGACAGCGTTTCAGCGTCCTCTTCAAATCCAAATCCATCG  
AAGAGCTGTCCGTCGATCGCATCAACGGAAAGACCAATACTGGCTTCAGATGGAG  
ACACGGACTCGAGCTCTCATCACTGTGTCATTTGCTGTTTTGGCTTATAGTGATGCAG  
ACATACCGGATCGCTTCACCAAACCGACAACACCACCCTTGCTTCTACCGACTGAGT  
CTTTCACGTCAGGCTGGTTGGAGGACGAGCTCTGGCCGCTTCCGTCTCGCCCTTATGA  
TGATAGCTTCCCCAAGCGTCAGAAGTAACCCGGAGGATATTTATTAACGTCCAACA  
GAATTTCAATGTTAATGGGACAAAGAAAGTGATGTGGCATCAGAATGGGGCGCCTTG  
GTTTGAGAACAGCGTCCAGAACCTATCTGGTGTCTGCTGTATAAGAACTCAAAGAG  
TGCCTTTCCTGATTACGAAAACGCTTTGAAGCACGGAGGCTACGACACGAAGACTAA  
GACCTATCCAGCCAAGCTGGGGGAAGTGCTGGAAATAATTTGGCAAACGTCGGCA  
ACACCCAGTCCGGCACGGTGGAGACGCATCCGTTCCATGCGCACGGCGACCACTACT  
GGGACGCCGGATGCGGGACGGGACGTTACAGCGAAACCGTCGCCGAAGCCATGCTG  
CAAGATCGAATGCGATACGGCGGACCCATCAAACGCGACACAACCAACTTGTACCG  
GACTCCGCCTGCCACCACCACGACACCGGGAGCGATTGTCAGCTGGAGAGCTTGGCG  
GCTGCGAGTGCGAAATCCCGGAGTGTGGATGGTACATTGTCACATAGTACAGCATAT  
GATGATGGGCATGCAAGCGGTCTTTGTCTTCGGGGGAAGAACGACCTCAAACCCTT  
GACGAAAGAACAGGCCGCCCTGTATCTTGAGTTTGGTGGGCAGGCCTATGGAAATGC  
TACTTACAGTCCGAGAGTTGTACATTTCTGGCACGATTA

>maker-scaffold17140\_size5016-snap-gene-0.8-mRNA-1

ATGTTGATCTCCATCGCGTCGATCGCGCCGCGTGACCTCCACGTA CTCTTCGATCGTG  
GAGCCCAGACATTCGCGATGAAGCGCGTCTCGCCGAAGTCGAGGTCCGGAAGGAT  
CCGCCGACGACGTGATCGACACCGGGGTTCTGCAGCCCGATCGCGTTGATCATGCC  
GCTCGGCGTTTCGACAGACCCGGTGC GGCGGGTTGCCGAGCCGCGGCTGCAGGGTTCG  
CCCCTTCAGCACACGGCGCCGACGTCGGTGTTCGAGAAACCCGCGACGCGCGTGTA  
TTCCTCGCCGAAACCGACACACCCCGAGAGGAGCACGATCGGCGACGCGAACTCGA

GTCCGCAGAAGGAATAGCGGAGCGGGGACTGCAGGGTTTCCGGCACGGCGGCCATG  
CTGCCATTATACCGTCGATGTTCCACGTGGTCTGTTCCAGCCCCGAAATCCCGCCGAA  
CACCGGCAATGCCATCCGCCTGTGCGCCAATACGGGCGCGACGCTGCATCTCGTGCA  
CCCGCTCGGGTTCTCGATCGACGAGGCCAGGTGCGCCGCGCCGGTCTCGACTACCG  
CGACATGGCCTGCGTGCGTGAGCATGCGAACTTCGAAGCCTGCCTGGCGGCGCTCGG  
GCCGCGGCGCGTGTTCGCCATCGAGACGACCGGCACGCGGAACTACAGCGACGAGG  
CGTTCGAGCCCCGGTGACGCCTTCGTCTTCGGTCGTGAAACGCTCGGTCTGCCCCCG  
ACGTGCTGGCCCCGCTTCCCGCCGAACGCATCCTGCGGGTCCCCATGCGGCCCGCA  
ACCGCAGCGTCAATCTGTCAAACGCGTCGCGCTCGTCTACGAGGCCTGGCGCC  
AGAACGGCTCCGCATCGAGGGTCCGAGTCCATGA

>snap\_masked-scaffold10846\_size8570-processed-gene-0.10-mRNA-1

ATGTTGATCCTGAACGGAACCCGCGAAGTCCCCGCAGCAGTGCTGAGATCGGCGCTG  
GCGATCGGCAATTCGACGGCGTTCACAAAGGCCACCAGGCCCTGCTGCAGCGCGCG  
TCTGAGATCGCCAAGGCGACGGGCGTGCCCTCGGCCGTGATGCTGTTCCGACCCCAT  
CCGCGCGAGCTGTTCCGCCCCGACAAAGCCACTTCCGCCTCACGCCACTCCCCCGC  
AAGCTCACGCTGCTGCAAGCGCGCGGTATCGACGTTGCGGTCTGTGCTCAAGTTCGAT  
CGTGAGCTTGCCGGCCGCACGGCAGATGCCTTCATCGAGGACATCCTTGTCCGCGAA  
CTCGCCGTCTCACACGTCATCGTGGGCTACGACTTTCACTTCGGCAAAGGACGGGGC  
GGCAATCCCGAACTGCTGCGCCGCGCCGGCGAGCGGCTGCATTTCCGGTGTGAGCATC  
ATCGAGCCCGTTCGACAGCGGCGGCGAGGCGTATTCGTCGAGCGCGATCCGCGCGAT  
GCTTGCCAAGGGTGACGTCGCCAGGGCCGCAACGATGCTTGGTCACTGGTGGCGCGT  
GTCTGGCCGCGTCGTCGGCGGCGCAAGCGCGGAACTGGGCTGGGCTTCCCCACCGC  
AAACCTCACTCTGCCCTCTGGAACCGATCTCGGCTTCGGCATCTACCCGTGCGGGTC  
TGGCTGGACGGAGAAGCGCACGCAGGCGCCGCTTATTTGGGCACCCGCCCCACCTTC  
GACGACGGCGCACCCGTGCTCGAGGTATTCCTGCTCGACTTCGACGGCGACCTCTAC  
GGCCGCGAAATCGAGGTCGAATTCATCGGTTTCATCCGCGAGGACCGGAAGTTCAGC  
AGCCTGGACGCGCTGAAAGCGCAGATGGCGGAAGACACCGACAAGGCGCGCCGAAT  
GCTGGCCGAGATGCCAACGGCGCCGGGCCGAGGGGGATAG

>snap\_masked-scaffold2018\_size23260-processed-gene-0.21-mRNA-1

ATGTTGAGGATGATGCGAACGACGGGGCGACCTGGCGCTGCACTGATGGCGAGCAG  
CGTGTTGCTTTGGCTCTGGCTGCCTGTCATGCCACCGACCCGTCCGGCCCCGCTGCC  
GCGACATTGGCGAAGAGCGGCGTGACCGACACCGCCATCGCCGCGCCAGAAAGCGG  
CGAGTGGCTGAGCTACGGTTCGCGATTATAGCGAACAGCGCTTCTCGCCGCTGACCCA  
GATCAGCAGCGACAGCGTTGGCCAGCTTGGCCTTGCCTGGTTCGGCAGACCTCGAAAC  
CGCGCGCGGGCAGGAAGCAACGCCGCTGATGCACAATGGCACGCTCTACGTTTCGAC  
CGCGTGGAGCATGGTCAAGGCCTATGACGCCGCCACCGGCAAGGCAAAATGGTCTC  
ACGACCCCAAGGTGCCGCGCGACACGCTGGCGCGTGCCTGCTGCGATGCGGTCAACC  
GCGGCGTCGCGCTGTATGGCGACAAACTCTATGTCGCGACGCTCGACGGAAGGCTGG  
TAGCGCTGGACCAGGCGACCGGGCGGGTTCGTGTGGGAGAAGGTCGTCGTCCCCAAT  
CAGACCGACTATGCGATCACCGGCGCGCCGCGCATCGTCAAGGGGCGGGTGTGATC  
GGCAGCGGCGGCGCCGAGTACAAGGCGCGCGGTTATCTTGCGGCGTTCGACGCCGA  
AACCGGTGCCGAGGCGTGGCGCTTCCACACGGTACCCGGCAACCCCGCGGATGGCTT  
CGAGAACAAGGCGATGGAGGCCGCGGCCAAGACCTGGACCGGGGAATGGTGGAAAG  
CTGGGCGGCGGCGCACTGTCTGGGATTCGATCACCTACGATCCCAGCTCAACCTC  
GTTTTCTTCGGCACGGGCAATGCCGAACCGTGAACCCGGCACCGACCGGGCGGACC  
GGCGACAGTCTCTATACCTCGTCGATCGTTGCGGTGAATGCCGACACCGGCGCCTAT  
GTCTGGCATTTCAGGAGACGCCGGAAGATCGCTGGGACTTCGACAGCGACGCCAG  
ATCACCGTCCCGACCTGGCCATCAACGGCCAGCAACGCCGCGTGTGCTCCACGCT  
CCCAAGAATGGCGTGTCTACGTGCTTGACGCGAAGAGCGGACAATTCATCTCCGCC  
AACCCGTTTCGTCCCGGTCAACTGGGCGTCAGCGTTCAACTCCAAGACCGGTGCTCCC  
ACGATCAACCCCGCAGCGCGCTACGAGAAGGCGGCGACACCGTTCATCGGCCTGCC

GGCGCCGGCGGAGCGCATAGCTGGCAACCGATGAGCTTCAACCCGAAGACCGGCCT  
GGTCTATCTTCCCGCCAACATTGCCGGCTTCCCTTATGCGGCAGCGAAGGACTGGAA  
GCCGTCGGACATCGGCTTCCAGACTGCGATCGATGGGGCGGCTACCGCGATGCCCGC  
GAATGCCGATGTGCAAGCCGGAGCGATGAAGGTGACGACGGGCGCGCTGATCGCCT  
GGGATCCGGTCGCCGGGAAAGTCCGCTGGACGGTGCCGCAGGTCGGCCCCGTGGAAT  
GGCGGCACGCTGACCACCGCCGGTAATCTGGTCTTCCAGGGCAATGCCGAGGGGCA  
GTTTCGTCGCCTATAGCGCCGACAAGGGCAGCAGGCTGTGGTCCTTCCCGCCCCAGAC  
CGGGATCATCGCAGCGCCGATGACCTATGCCATTGGCGGCCAGCAATATGTTGCCGT  
CCTCGCCGGCTGGGGCGGTGTCTGGGATATCGCCACCGGCGTGCTCGCGCGCAAATC  
GGGCGCGACGCGCAACATCAGTCGGCTGCTGGTCTTCAAGCTCGGCGCCAAGGGGCG  
CCTGCCCCCGGCCACCAGATGACCAAGCTCGTGCTCGATCCGCCCGCGTTCCGGGG  
AACGCCCCAGCAAGTCGCGCGCGGGCGGGCAACTCTACGGCCGCTACTGCAATGTGTG  
CCACGGGGATGCCGCGGTGGCCGGCGGGCTCAACCCCGATCTCCGGCATTCCGGCGC  
GCTCAATGCGGCGGAAGCAATCCGCTCGGTGGTCATCGACGGGGCCCTGCACGAGA  
ACGGCATGGTCTCGTTCAAGTCGGCGTTGACCGCCCGCGATGCCGAGGGCGATCAGGC  
AATATCTCATCAGCCGGGCCAACGAGGACAAGGCGCTCGAACTGCGCACCAAGCC  
GCGGCCCGCTAA

>snap\_masked-scaffold215\_size60928-processed-gene-0.14-mRNA-1

ATGTTGAGCGTTATGAGATCGAAGGAACCGTATAGTGCGTTAGTTCGACATTACAGT  
GCAGGATTGCCAAGAATGCTGATGAACCCCGTACGCATTCCCAAGAAGATGTTGTG  
CAATGCAGCTATTGTGGCCAAAAGGGTGACCGGTTCTTGGTTTCGATGTTGCGAAGTC  
AATTGCGGGCTGTACTTCTGCAACGGCTGCAACACGCAAGAGAATAGTCCAGGAAA  
ACCGGACAGTCACATTATTAGTCACCAGCGCATATCGGATCACCATAGAATCGCCGT  
ATACCACCGGCAAGACCACAACGGACCAGAGGGCGGCCAACTTTCGAACACGACC  
AGAAATACTACACCTTCGGGTGTATACTACACCTTCGCCCGGTGAATTATGACCATG  
TTCATAGTCCTACGGAGAATGGCCACTATGATACGAGGAGTGAAGAGGATAGATGG  
TTCTGCGAGCTACGACAGATCGAGTGGAAGCGGTACCGCAGCGGGACGAAACTCCT  
CCCCATGGTGGAACGTACTCATCCGACCTACAAGCACTTCAATCTGAGGCTAGCCTT  
GGTTCCTACCAAATCGGACCAGAAGGGTTGTAACCTGATGTTATGGAAAAATATTAA  
AGCCCAGGAACGGGCGTGGTTTTTGGAAAAGTGCGGCCTTGCTCCGCTGTAAACAA  
TCCGGCAGTTTTAAGTGCTCCAGTTTATAGTTTTATGAACGAGCGCGAGTACAACGA  
ACACTTTCGCCACCTTTTGTATGTGGATAAAAATGGTGTCACAGACCATCACACTCATC  
GACTGGAACAGGGGAGATGGAACACCCATCAACTGGCTGGACTTTGAGTCGACCTTG  
GATAACCACAAAAAGAACTACCGCAGTTGTATGAGGAAGGCAAAACGGTTCAACT  
ACTGGTAGCACGTCTGAACGCCCTGTTCCTGTTTCATATCATCAGTATCCGCAACCGG  
AAGGATACAATGATTTTTTCGAGTTGTTTTAGAGGACAATTCGATACAGGAGGAAGAC  
CTTAATGGTCGTTTTTGGCATTATATTGCCTATGAAGATACGCGATACGAACGGCAA  
TTAGATGCATTGAAACACTTTACTACAGACACCAACTTTCACCGATGTCAGAACCAT  
ATTTTTCGGTTTCATCTTGGGCACGCGTAAGGGTGAACACTACAGCCGAGTTATGAGCAC  
GACTGGAGGGACCCTCGTGATCCTCCGCGGAGGCTGGCTTCTCGGAACAGACCCTC  
AATGAGTACCAGGAGAATGCGGTGCGCATGGCGCTATCCAAGCCGATTTCACTTATA  
CAGGGCCCTCCAGGCACAGGGAAGACTCATACTTGGCGGCCATTGTCCGGAACGTA  
TTTGAACAACGCTCAGGCAGATGGAGACCCAAGGTTCTCTGCTGTGCGCCAGTAAC  
GTTCCACGGATAACATTGCGTTACGATTGGCGGAAGATTTCCGTCTTACGGTCCTAC  
GGATTAGTTCACGCAAAGATCAGGCTAGAACGGTTAGTGAGGCGTCGCTGAAGCTG  
ACGCTCCACTACAGGGTACAACATGAGCTGCGAAACATGGATCCGAAGAAGGATGA  
GGAAGCTTATCGGATGGCCTGGAATGACGAGGCACGCAAGCTGATCAAACAGTGCG  
ACATCATCTGCACAACCTTGCAACACGGCTGGATACGGAAATCTGAAAGGCGTTTCT  
TTTCGCACGTCTTTCATTGATGAGGCAACACAAGCGTCCGAATTGGATGCCTTAATTGC  
CATACCAAAGCTCGTACTAGAGTTGTGTTAATTGGAGATGAACACCAATTGGGCGT  
TTCAACGAATTTGGATTTCCGGAACCTGGATAAGAGCAATTTGGGCATATCCATGTTT



GGGAGAATGACACACCTGAAACAGGTGCCACGCGTCATGCTCGAGATGCAGTACCG  
TATGCATGATACCATCTGTGACCCGGTCTCGAGGGTCATTTACGACAAACGGCTCCA  
GACTGAATCGAGTGTCCGCCAGTTGAGGAACTGCAACAAGTTGAGTTTCATTCACCC  
GAGACCCGGCTCCGGTTCGTCATAGCCAGGTTCATATGGATCGACTCGGCTAAAGCGCA  
CCAGACCGTTGCAAATGCTAGTGGCGGGGCGGTGGGATTTCTAGATGAAGTTCGACG  
AATGACGGTGGCGCTGACTCGCGCAAAGAAGGGACTAGTTATCGTGGGTAAACCGCG  
AGCTACTCGAGGCCGCGGAAAAGCATTGGAAAGAGATCATTGAGCAATATCCGGTG  
GTAGTCGAAATGGGGATGATGACGGTGAATGCTCTTTCCCCCGGGCAAGCATATGTT  
CGAGTGCAAGGAAAGGAAAACGACATTAACATTGACGGTTCGCGTGACCGAGGTGG  
GGCTATGAATGGCGATTTAGTCATGGTGGAGGTGCACCCTCAAGACCAATGGAAGAT  
TCGATTAGAAGCAATCGAAGAGATCCAGGCCTTCTAAAATACCAGATCTCGGGGA  
CTGTGTCAGTGGTCAAGACATTGAGTTCCTCCAAAAGAACAACGACCTCCCGCTCG  
CAGTACCATCAACCGCGGGAGAGATCTCTACGAAGTGGTGGAGTACCAGGCCGTGT  
CTGGATGGACGTGGTTAATCGCTGTATGGATGCTGCTCAAATCCTTCCGGAATGGCT  
CCAGAGAACTGGCAAGGTTGTGTCCATAATGTCAAAGGAGGGAAATCGCAACTTTGT  
GGCCTTGTGGTTGAAATGCAACGAAACGCCGTGAACTGGAATGACACCGCGTTTGT  
ATTGGAGCCAATCGATCCTCGAATGCCTCGCGCGGAAATCCGTCTAGAAGACGTCCC  
CGAAGCGATCCGCAATCGATTGCGCGACACCGCGGATGTCGATCTGAAGCACGAGCT  
GTTTCACGCCACCTTTACGGGCCATCGTCGAATCACCAACATTAACGACAGAGGTGC  
CGGCCGGCCCGCCTGGCGATGTTTCATACCAAGAACATCTTGGTTGAAAATGGAAT  
CCAACCGGTGCAGTTTCCGGCGAACCAAGTCCAGGACGTCATTGAGAAGGCAGCTGC  
CAGACATGTAGCAGAGGGCAAAAAGTAGCTTTGAAGATTTTCGCGACCAATTAGTCTT  
CACCATAGACCCCGCGGAGCCAGCGACCTTGACGATGCAGTGTCTTATAAAGTCTT  
AACTGACGGTACTCTCGAAATTGGCGTCCACATAGCGGACGTCACATCCTTTGTTGA  
AGCGGGTACCAGAGCAATTAATCTAAAAAAAATTGCTATGAACGGGGAGACGATG  
GCCGATCCGTCATGGTGCAGGCTTTTCCGAATTTGGCCTTACTGCGCCGTCAGCAGCC  
GCCTCGAGCGGACGTCTTTCCAAGTTGGTTCGACTTTGTGACCAGGAAAAACTCCA  
ATTGAGCTCCTACGCCAGCAAAGTCTACCCGCACTCTTAGAAGAAGTCTTGGTCAG  
TCGACCGGACCTTACCCGGTACTCCAAGCGCAATGTATTAAAAAAACC CGCATTGC  
CGAGTATGTCTGTACGGGGAATGAGAAGGACACCCACCACTTCTCCCTCAACATTCT  
GTA CTATACCACATGACGTCACCGATCCGTCGGTACGCCGATATCTGGGTCCACCG  
TCTCCTCCTGGCAGCGCAGGAAGAGAACCCGAAGATTCGGGCGGGATTGACTCCGGA  
AATTATGAACGACATTGCGGGGGACTGTAATGTCGCCAATGCGGGCCGGAAGACCTG  
CAGTGCGGCCAGTCAGAGCCTCTACATGGGGCTCCATCTGATGGATGAGTACGGCGG  
TAGTAGCCGGCAAATGGGAACGGTGGTAGCGGTTTATGCCGCCAGTCGGGCAGTCG  
AGATTGTAGCCCCGAGTTGGGCGTGACAATGCGAGTCTTTTGCCGGGAACAGGCTG  
GTCTGGCGAGGATCAGTCATCATGTCACCAACGAGCGACAGTTACTGGAAGTGGGT  
GGGGCTACGAGGGTAGAGAGGATGTTGATCAGCTGGGTATCGGGAGCCAGATCGAA  
GTGGATGTAGGCCTCAATGGTGACAACGTCCGGCTCATTAAGATTACAATCACACCG  
CCCCATCTCCGCAACCTCATCTCCGCCCCAGCAGTGACCATTCCAATGAGGCTGAG  
CCGCATTTTGAGGACCATGCACAGACGGAGTATGGACTCCATGCATAA

>maker-scaffold17086\_size5035-snap-gene-0.10-mRNA-1

ATGTTGAGCGTCAGCGTGTGGGACAAGAGTGTTCGTCGCGCGACCCACCGCGCAATC  
CGGAAGCGCCGCTCGGCCTCAACCCGATCACCGATGGTCAGACCCTGCGTATCCCG  
ATCCCACCTCTCAGCGAGGAGCGCCGCAAGGATCTGCAGAAGCTGGCTGGCCAGTTC  
GCCGAGAGCGCCAAGGTTGCCGTGCGCAACGTGCGCCGTGACGGCATGGAAGTGCAT  
CAAACGCATCGAGAAGGCGCGGCCTGAGCGAGGATCAGGCCAAGGGCAAATCGA  
ACGACGTCCAGAAGGTCACCGATCACCATATCAAGGCGATCGACGATCTGCTGAAA  
GCCAAATCCGAAGAGATCATGCAGCCCTCTCCGCCAAGTGTGATGTGGCGACCTTG  
CGGTCGCCCGCCGCGGCACGTTGCTATCATCATGGATGGCAATGGCAGGTGGGCGAAG  
GCGCGAGGTCTCCCCCGCGCACTTGGGCACAAGGCCGGTGTTCGATGCCCTGCGCGAT

GCCGTCGAAGCGGCCCGCGATCTCGGCCTTTCGCACCTCACCGTTTTCTCGTTTTCCA  
CCGAGA ACTGGAACCGTCCGCAATCCGAGATTGATGCCCTGTTTCGATCTACTTCGCA  
TGTTTCGTGCGCCGCGACCTCGCGCGCTGCACAAGGACGGTGTTCGTATCCGCATCA  
TCGGATCGCGTGACGGGCTTAGCGAAGATATCCTCGCGCTCGTTGACGATGCGGTCG  
AAACGACGAAAGACAACACCCCGCTCACCTGAACATTGCGTTCAACTATGGCGGCC  
GCGGCGAACTAGTCGCGGCCATGCGCGAGATCGCAAAGCGCATCGAAGCGGGTGAG  
CTCAAAGCCGATCAGATCGACGAAGCGATGATCTCGCGTACGCTGTGGACCGCAGA  
GTCCCCCGATCCGGATCTTGTTCATACGCACCAGCGGCGAGTTGCGGCTCAGCAACTT  
CCTGCTCTGGAGCGGGGCGTATGCCGAGCTGATGTTTCATGGACTTGTGGTGGCCGGA  
TTTCACGAAGGAGAGCCTCGAGAAGGCGATCGATGCGTTCAGGCGACGCGACAGAC  
GGTTTGGCGGCCTTGGCGCCTGA

>snap\_masked-scaffold4346\_size15633-processed-gene-0.4-mRNA-1

ATGTTGAGCGAAGAGGCACGGTTCCTCAGTGTCCCAGTTGCGGGCTGGTCGTTTCGAC  
CCAGAAATCGTCTCCATATTCAGGCAAGTGAAAGAAACGCCGAAGAAGAAGCAGA  
AACACCCCTGGAAGAAGATCGGCCCAAACATGGCGGCCATCATACGGAGACTCACC  
ATCGCTGCCACCGCCCATCAATGAAGCTCGTGAAACCTTCAAATATCGCTAACGG  
CCATCTGGAAGCTGACGACGAAGAAAGGTCACTCGATTTTCAGAAATCGTCTCAATCT  
TCAAAGCACCAAGCGAAAAAAGTACGATTTACATTGTGGCGAAGGAATTTGCAGTTG  
GAGTGAAAGAAAAGCTGAAGAAGCAGAAACACCCCTGGAAGAAGATCGATCCACCA  
TCGATGCCACGGCCCATCAATGAAGCTTCGCTAACGGCCATCTGGAAGCTGACGAGG  
AAGAAAGGTCACTCGATTTTCAGAAATCGTCTCCCATCTTCAAAGCACCAAGCGAAAA  
AAGTACGAATTACATTGTGGCGAAGGAATTTGCAGTTGGAGTGAAAGAAAAGCCGA  
AGAAGGCAGAAACACCCCTGGAAGAAGATCGATCCACCATCGCTGCCACGGCCCAT  
CAATGAAGCTTCGTAA

>augustus\_masked-scaffold12673\_size7473-processed-gene-0.3-mRNA-1

ATGTTGAGCCATTTCGGTCTTGCCCTTTGTATCCTGCCCGAGGGTGGCCGCGATCCGGA  
TCGTGCTTTCCCCGATGATCAGTGGCGATCTGGTGCCGATGCGTTGTCCCTGGGGGA  
GAAGGGGGGCGAACGCTTGCCTTTCTGCCTGTTGGCGGCGCGACCCGGGCCGAAA  
GCGTCGCGAATGCGCTAAACCTGATTGCCGAAGAAGCGGATCGCGATGATTGGGTAT  
TGGTGCATGATGCAGCCCGACCATGCATCACGTCGGCCATGATTGAAAACTGATTG  
ATGCGCTTGCTGACGACCCGGTAGGCGGACTTCTCGCCATTCCGGTCGCCGATACGG  
TCAAACGCATGACCAGCGACCAGCGCGTGTCCGGCACCGTCTCGCGAGAGGGTGTG  
GGCTTGCCAAACGCCGCAAATGTTTCCCTCGGGCTTTTGCGGCAGGCGTATCCGGA  
CGATGTCACACGTGACGGATGAAGCCGGAGCGATTGAAGGCTTGAACCTGGGGGCG  
ACTTTGCTTGTTCGGCCATCGGTTGGTCTGGCCAATCGTTTTCGCGCGGAATTGAGCA  
GGTCGCAGCCCGGGTTGAACTCTCCTCTGGGGACGATTTACCCCTCGGTGACTCTG  
ACCGGGATGGCAAACCCGTGGATGCGGAGTCCCAGCTTCGCGAGATCGAAAACACC  
AAAAAGCTCATGAAGGCCTTGGGCGAGTTGCATGGGCAGGGCGGCGCGGGGACA  
AGGCCAGTCGCCCGGTCAATCAGCTGCGGAGGCAGCGAAATCCGCTGTGGCGCCTTC  
CCCTTCGACCGGGCCGACGGCTGGGCGCGACGCCAGCGGCCCGGGGCTCCCCGGGT  
GCCTGTGGAGGAACTGCGCGCCCTGGGCAAGGGCGCTTCCCAGGCTGCACGCGCGGT  
TGGACTCGAGACCGGGTCCGGGGCGGGCGCGGCTTCGACGCGATCTTCCGATGGCAA  
TGTGAGTGATGAGGGCGGCATGCGTCCC GCCCGCGCACCGGCGCCGGGCGATGAGG  
AGCGGTTCAAGGCCATGCTCGAATCGCTGATCGAGGAGATCGGCCCTTGGGTGATTG  
CCTTTGTGGTTTTGTTCTTGTTCGGCTATGCGGGAATATCCTGGCTTTCCGCACGGGC  
GCAGAGGGCATCGCGACGAGGCGACCGCGGCCGGTTCGGGCGGCGCAA AAAAGGGC  
GGTTCAGGTCTCGTTCGAGCGGCTTTCACCTGGGCGTGGGGGAAGTGGTCCCCT  
GAGCGTGTACCCAGAGTCCGAGGAGCGACGGCTAG

>snap\_masked-scaffold14864\_size6151-processed-gene-0.5-mRNA-1

ATGTTGAGAACAGCTATGGGGCCTTCCATTGCTGCTGCATTGGCCGATCCGAGCGTT  
ATAGAAATCATGGTGAATCCCGACGGTGTGTTGCGCCTTGATCGTTTGGGCGAAGGT

CGGGTGGATACCGGAGAGAATCTTCAGGCGAGCGAAGTAGAACGGATTATCCGGCT  
GGTGGCGGCTCATCTCCGCATCGAAGTCCATGCGAATAACCCGGTGGTGAGCGCCGA  
ACTGCCCGAAACCTGCGAACGGTTCGAGGGATTACTGCCGCCGGTGGCGAAGGCGC  
CGTGTTTTGGCCATCAGGAAGCCAGCATCGGAAATCAAGACCCTCGAAACATATGTGA  
TCGACGGCATCATGGCACCCGCGCAAATCGTTCGCGCTGCGCCGTGCCGTGGCGGAGC  
GTCGGAACATTCTCGTGGCAGGTGGCACCAGCTCCGGCAAACAACACTGGTCAATG  
CGTTCTGGCGGAAATCGCCGAACTCCAGGAGCGCGTCATCATGATCGAGGACACGC  
GCGAACTGCAATGTGCCGCCAGGATTGTGTGGCACTTCGCACAAAGCCCGGTGTCCG  
TCACCATGGGACAGCTCGTGGCAGTCCACGCTCCGCTTACGACCGGACCGCATCATTG  
TCGGGGAAGTGGCGGGTGGTGAAGCTCTCGACATGCTCAAGGCGTGAATACAGGT  
CATCCCGGCGGTGTAGCTACGATCCACGCAAATTCGCGCGGTGCGGCACTTTACCGC  
CTAGAACAGCTCATCCTCGAAAGCATCACTAACGTGCCTCGACAACTTATCGCCGAG  
ACCATCGACCTAATTGTTTTTCATCTCAGGCCGTGGCGTGAACCGAAGAGTGGAACC  
ATCGCCGAAGTCAAAGTCTAGGCGCTGATGGAGATTATGTGGTGATCGAGGATCAA  
CAACCGCGCCTGCGTGGCTCTAA

>snap\_masked-scaffold3525\_size17755-processed-gene-0.5-mRNA-1

ATGTTGACTCCGGCAATGCGGTGTGGCGGATACTCCATCCCGGATATTGCACGCAA  
TTACATCTGAAACAACCAGAGGAGTTTTTTGTGGATACACCGAACGGCTATGGCTTT  
ACCTTAACCGAAGAACAAGATGCAATACGGCAGGCAATTCGTGACTTTGCCGAGAAT  
GAAATACGTCCTGTTGCTATGCAGTACGACGAGACGCAGGAATTTCCCCACGAGATT  
TTTCAGAAATTAGGCGAACTCGGTTTTCTTGGCGTTGTTATTCCGCAGGAATACGGCG  
GCTCAGGTCTGGGATATATGGAATATGCAATCATCGTGGAGGAAGTTGCGCGTGTAT  
GCCCTGCTATGGCTCTGGGTGTGGCTGCTCACAACGGACTCTGTACAAGTCATATTTT  
CCGGTTCGGCAGTGAAATGCTGCGCCGGAAATATGTAACACAACCTGCCGCAGGGCA  
AACCTTAGGCGCATGGGGACTGACCGAACCCGGCGCAGGTTCCGATGCAGGCGGTA  
CACAAACCACTGCTGTGCGTGACGGCGATTCTTACATTCTGAACGGTTCAAAAAATT  
TTATTACTCATGGCAATGTGGGCAATATTGCCGTTGTGATGGCAATGACCGATGCTTC  
CAAAGCTAAAAAAGGTATCAGCGCCTTTGCCATTGATAAATCTATGGCAGGTTTTTA  
CGGCTCTAAAAAAGAAAATAAAGTGGGAATGCGGTGCAGCGATACTGCTTCACTTAC  
TTTCGATAACGTTTCGTGTGCCGGCGGATCACCTGATTGGCGCTGAAGGTGAAGGCTT  
TGTTCAAGCGTTGCAGATTCTGGATGGCGGGCGTATTTCCATAGCAGCCCTGAGCTT  
AGGTTTGGCACAAGGCTCGTTTGAACATGCCTTGCAGTACTCGCGTCAGCGCGTACA  
GTTCCGTA AACCTATCGGCCATCAGCAAGGTATAATGATGAAACTTGCAGCGTATAAG  
CATGAACATTGATGCAGCCC GCGCCCTGACGTATAAAGCGGCTTGGCTTCGCGATAA  
GGGGCAGCCCTTTGGCAAGGCGGCATCCTACGCCAAGTTCTTTGCCAGCGAAATAGC  
TGTGCAGGCTGCGGAAGAAGCAGTGCAGATTCACGGCGGTTATGGTTATATCAAAGA  
ATATCCGGTAGAGAAGCTCTGGCGCGATTCCAAATTACTCACCATCGGCGAAGGCAC  
AAGTGAAGTGCAGAAGATGGTTATAGCGCGTCATTTGCTCTCCGAATTAGAATAA

>snap\_masked-scaffold17396\_size4900-processed-gene-0.8-mRNA-1

ATGTTGACGAAGCCC GAAATGTCACCGGATGGCGAGCGCGCCCGTGACGTCTGTAGT  
CGCCACGGCAATCGCCCGGATGAGTTGATCGAGATCCTGCATGACGTGCAGGAGGA  
GCTCGGATTTGTGCCGGAAGCCGTCATCCCGGTGATTGCGAAGGCGATCAACCTGTC  
CCGCGCCGAGGTCCATGGCGTCGTCACCTTCTATCATGATTTCCGCCGCGAGCCGGC  
CGGCCGCCATGTGGTGAAGATCTGCCGCGCCGAATCCTGCCAGGCGATGGATGGCGA  
GGCTTTGTGCAACCACGCCAAGGCCAGCCTCAAGGCCGGCTTCGGCGAAACGACCGC  
CGATGGCCAGGTCACGCTCGAAGCTGTCTACTGCCTCGGCAATTGCGCGCTGTCCGC  
GGCGATGATGGTCGACGGCCAGTTGCATGGCCGCGTCGATGCCCGCCGCTTCGACGA  
GATCATGGGCGAAACGCTGAGCGAGGCCGCGCAATGA

>augustus\_masked-scaffold12726\_size7449-processed-gene-0.0-mRNA-1

ATGTTGACCCGTCGACACGCAATCAAACACGTGGGCGCGCTGCTGCTCTCCGCGGCG  
GTGACGTTGACTTCACTTACGGCCCCGTCTGGCTTAACGGCTTTGGCGCAGACCCCG

GCCCCGGCAGTTTCTGGCAACTTGACGGTGTATGCGGCTGCTTCGCTGACCGATGCG  
TTTAAAGAAATCGGCAAAAACCTTTCAAGCCCAATATCCCAACACAACCATTTCGTTTC  
AGCTTTGCCGGCTCGCAGCAACTGGCGGAGCAGATTGGATTTCGGCGCGCCGGCGGAT  
GTATTTGCCAGTGCCAACCAGCGGCTGATGGATGCGGTGGTCAAGACCACCCGCATC  
AACTCAGGAGAGTCGCGTACCTTCGTTTCGCAACCGGCTCGTCGTCATCTACCCCAA  
CGAACGCGGCCGGAGTGCGTAAATTGCAGGATTTGGGCAAATCGGGGCTCAAGCT  
GGTGTGGCGGCCAAAGCCGTACCCGTGGGTGGTTATTCGCTGGACTTTTTGAACAA  
AGCATCGGCCAAGTCTGATTTTGGGGCCGATTCAGCTCGAAGGTGCTGGCTAATGT  
CGTCTCGTATGAGACTGACGTCAGGTCCGTGTTTCAGCAAAGTCGCCCTGGATGAGGC  
CGACGCCGGCATCGTATATTCGTCGTATGTCATCGCCGATAAAGCCAAAGATGTGGG  
CACGATTGATATCCCAGCGACCTCAACACAATCGCGACCTATCCCATTGCGGCGTT  
GAAGGACAGCCCAATCTGCCATTGGCTCAGGCGTTCACCAAATACATCCTTTCCGC  
GGCGGCACAACTGTGCTCGTGAAATATGGCTTCATCTCGACCACCGGCGATGCGAC  
GGGTGCGGCACCCAAAGCCGGCACCCCTGCTCATCACCGGGCTGGTCAGCAAGCCAA  
CGACGATTCAAACGGCAGCGTTGAAGCGGCTGAAGCAGGTTTCGGTGCAAGCGACA  
GATCGGAATAGCACCGAGCAAACCTACACCGGTGCCACGATTGCCGATGTGTTGAAG  
CTGGCCAGCGTGAAGCCCGAAGCTAAAACCGTCACTTTTATTGGTGGTGTGCTAT  
AGCCAGGATATCGCCATCAGTGCCTGAGTGGCTCTGCCGGCGTCATCACGATTGAT  
GAGAATGGCGCATTTAGGAATATCGTGCCGGCCAGTCTGCCCAAATTCTGGGTGAAG  
GACTGTGCCCTGCGTGGGCTGATTAATACAGCAATCGCAGGAGTTTAGAAATGGTC  
GATAAAGTCATTAACCGGATGAGGAATGGCGCAAGGCATTGACGCCGGCCCAATA  
TGCGGTGGCACGGCAGGCCGCTACTGAGCGCGCTTTCACCGGCAAGTATGTGGACAC  
CAAAGAGGACGGCACATAATTGTTGCGCAGCCTGTGGCGCGCCCTTGTTTACCTCAA  
AACCAAGTTCGATTCGCACTGCGGCTGGCCAGCTTTTTTCGATGTGATTGATCCGAGC  
TGCCTCATTGAACGGGTGGACACCAGCCATGGCATGCGCCGCACCGAAGTGCTGTGT  
GCGCGCTGCGAATCTCATCTGGGCCATGTCTTCGAGGATGGGCCGCAGGATGAGACG  
GGTTTGCCTATTGCATTAACCTCCGTGGTCTTGGACTTGAAGAAAGCTGGATATTTG  
GACAGGATGAACAGGATGAGAATCCACTCTCAATCCTGTTAATCCCCTAA

>snap\_masked-scaffold19554\_size3991-processed-gene-0.2-mRNA-1

ATGTTGACACAGGAAGCCAAATGCGAGTGTGGGAACGCCGGCGGTGGCCGCCGCGCC  
TGTGCTGCGGGTTGAAAGCATGGGTGTGAGCTTTGTCGGGAAGACAGGGCCACGCGT  
GCGGGCGGTGGATAACGCGAGTTTACGGTGTATCCGGGGCAGACGCTGGCGATCGT  
TGGAGAGTCTGGGTGCGGCAAGTCGGTGACGGCGATGAGCGTGCTGCGGTTGGTGCC  
TTCGCCACCGTCGCAGGTTGATCGCGGGAGAGTTTGTTCGCCACGCGAGGGCGA  
GCCGGCGCGGGACTTGTGAAGTTGAGTGACGTGCAGATTCGACAAGTTCGGGGCG  
GGGAGATCGCGATGATCTTCCAGGAGCCGATGACGTGCTGAACCCGGTGTACACGA  
TCGGCGATCAGATCGTGGAAGCGGTGATGCTGCATCAGGGATTGTCGCGGCGGGCG  
GCGGAGCGTGCGGCCGTGGATGCGATGCGGGATGTGGGGATTGATAATCCCGAGGG  
CCGGCTGCATGCGTATCCGCATCAGTTTTCGGGCGGTATGCGGCAGCGGGTGTGAT  
CGCGATGGCGATTGCATGCCGGCCGGCGTTGCTGCTTTCGGATGAGCCGACGACTGC  
GCTGGATGTGACGATTCAGGCGCAGATCCTGGAGTTGTTGCGATCGTTGCAGCGTTC  
ACGCGGGATGGGGATGGTGTGATCACGCATGATCTTGGAGTGGTCGCGAATCATGC  
GGATGTGGTGTGTGTGATGTATGCGGGGCGGGTGGTGGAGTACGGAAGGACGAGGG  
ATCTGATCGCGCGGCCGCTGCATCCGTATACGAGGGGGCTCTTGGCGTGCGTGCCGG  
TTCTGTCGGACCAGCCGCGCACGGAGCGGAAGCGATTGGTGACGATCAAGGAGTTG  
GCGGAGGCACCCGGGCAGTTTGTGCGATAGGCGGCGGTACCCGGGCGTGGTGGCC  
GTGGCACGAGGCGCCTGCTGGGACAATGCGCGACGAGGGGAACGCAGCGTCCGACT  
CGGTGCTGGTGGAGTTGAGCCGGAGCACTTTGTGTGTATGTGGCGATCGGCGACTG  
CCGATGCTGTTGCAGTGGTTGTGCCGGATCTCAGACCAATGAACGCGGGGGTGTGA

>snap\_masked-scaffold19253\_size4113-processed-gene-0.4-mRNA-1

ATGTTGACACAGCGTTCCCGCTACGCGCTGCGCGCGATGCTTTTCCTCGCCGAAGCA

CCCGCCGGTGGTCCGCCGATCCCGATGAACCGCATCGCGACCGAGGCCAATGTGCCG  
CGCAAGTTTCTCGAGCTGATCCTTGCCGATCTGCGCGAGGCCGGGTTCTGCACAGC  
CATCGCGCAAGATGGGCGGCTATTGCCTGTCGCGCCCCACGCACCTCATCTCGCTC  
GGCGAGATCATCCGCGTGATCGAGGGGGCCGCTGGCGCTGGTGCCGTGCGTCAGCCGC  
ACCGCTATCGCCGCTGCAACGACTGCAAGTCCGAGGCGACCTGCGCGATCCGCCAC  
GCGATGATGCGCGTGCGCGACGAGACGGCGCGGATTCTTGACGGGACGAGCCTTGC  
CGACGCCGCGGCGGAGGATCTCGCAGCGGCTTGA

>maker-scaffold3193\_size18692-augustus-gene-0.25-mRNA-1

ATGTTGAATCAAGACGTGGCGGGGACCAGCCTGCCTGAAACCGTGATCCGGGTAGA  
ATCAGAAGCTGTACCCAAACATGCTGCCACTATTCGTCTGTAGCGCAGATCGGCTGAC  
GGCCTTCTTCAATCGCTACCTGATCTATTGGCTCGTGCCCATCCTGATTCTCCTCACGT  
GGCAAGTCATCGTAGATCGTGGCGTTGTCTCGTCTCGCATCGTTCCACGCCCCGTTGC  
GGTGGTCAAAGCCGCCATCAAACCTGATCACGACGGAATCGCTGTTAATGATGTCCG  
GATCAGCACGCTGCGGGCGTTGTCTGGTTTGGCGGTTGGCGGCTCAATTGGTTTCGTG  
TTGGGGATGCTCAACGGCATCTCCGGCACGAGCGAAAAGCTGTTGGATAGCACCATT  
CAGATGATCCGTACCATCCCGCATCTGGCGCTGCTGCCGATGGTCATCTTGTGGTTTCG  
GGATCGGGGATTCCGGCGGACTGTTCTCATCGCGCTCGGCGTCTTCTTCCCCATCTA  
CGTGAATACCTTTCACGGCATCCGCAATGTCGATGGCGGGCTGGTTCGAGATGGGACG  
CGTGTACGGTCTCTCGACATGGCAGTTGTTCTGGCAGGTGATCTTCCCCGGTGCCATG  
CCCTCTATCCTCGTCGGCGTGCGGCTGGCCTTGGGCATCATGTGGCTGACCCTGATCG  
TGGCGGAAACCATCGCGGCGAATTCGGGCATCGGGTTCATGACCTCCTCCGCGCGTG  
AATTCATCCGTGTGGATGTGATGTTCTTCGCGGTGGTCTTGTACGCGTTGCTTGGCAA  
ATTAGCCGATGCAGTGGCCCCGTTGTTGGAACGTCGTTTGCTGCGCTGGCATCCCCGC  
TTTCAGGACGTGCGACCGGGCGAATTCGTCGCCATCGTCGGCAAAGCGGCTGTGGC  
AAGAGCACCTGCTACGGCTGGTCGGCGGTCTTGACGAACCCGATCACGGTTCAATC  
GTCGTAGAAGGGCAAGCCCTCCGCAAACGCAACGAACTCGCTCGCATCATGTTTCAG  
GATGCGCGTCTGCTGCCGTGGAAACGGGCGCTCGATAATGTCGGACTTGGTCTGGCT  
GGTGAGTGGCAACCCCGCGCTGCCGAGGCACTGGCGCATGTCCGGGCTGACGGACCG  
CGTTACGAATGGCCTAACGTGTTGTCCGGCGGCGAACGTCAGCGGGTGGCTTTGGC  
TCGTGCCCTGATCACGCGCCCACGCTTGCTTCTGCTGGATGAACCCCTCGGCGCTCTC  
GACGCCCTCACACGGATCGAGATGCAGCAGTTGGTTGAGCGGCTGTGGTTAGAGGA  
GCAGTTCACGGCTTTGCTAATCACGCACGATGTCGAAGAAGCCGTCGTGCTGGCTGA  
CCGCGTGCTGCTGATCGAAGATGGCAAATCGGGTTGGATGTACGCGTCGATTTCCC  
ACGCCCCCGCAACCGTGGCAATGCCGAATTTGCGGCACTAAAAGAGCAGGTCTTGA  
GCGTGTCTTAGGGTTAACCTAACGGTCGCCTAA

>maker-scaffold3874\_size16837-snap-gene-0.13-mRNA-1

ATGTTGAATATTGTATTATTTGGCCCTCCAGGAGCAGGGAAAGGTAATCAATCGGAA  
CGATTGATTGAAAAATACGGACTGGTTCACCTATCAACAGGTGATATGTTCCGGGCA  
CACATTGAAAACGATACCGAATTGGGCAAACACGTTAAGCAAATCATGGCAGACGG  
GTTTCTTGTTCGCGATTCTGTAACAATCGATATGCTCGAAGACGAGGTACAAAAACA  
CCCGGATGCAAAGGGTTTATCTTCGACGGATTTCCGAGAACGGTTGTTCAAGCCGA  
AGCATTGGATGCTTATTTAAAAGAAAAGGACAGCCGATACAACTGTTTTACAGTT  
GGATGTTCCGGAAGAAGTAATCAAAGAACGCATTGAATTGCGCAGTAAAGTGAGTG  
GTCGCGCAGACGATGCCGCCGAAAATTACTGAAGCGCATCAATGAATATTTACCA  
AGACAATTCATGTTTTGCCTTATTATGTAGAACAAGGCAAAGTGATTACAATTAACG  
GAGTGGATAACTTCGTTGATTATGTAATAAATACATTGCCAGTCAGGAAACGGTGGTG  
GTGGATCTGCGCATTTTCGACGCGAAAAATACATTCCACAGGGTGGTCTGACGGTG  
GTGACGGTGGTTCGCGGAGGACACATTATCTGCGTGGAACAAGCAGTTGTGGACCT  
TGCTTACCTCAAATTCACAAACACATTAAGGCAGGTCATGGAGCTCACGGTTCCG  
GAAACCTGCAAACAGGCTCGCAAGGTGAAGACAAGTACATTGAAGTACCACTCGGA  
ACCATAGCCCGTGATTCCGAAACAGGCGAGTTTTTATTCGAAATTACCGAAGAAGGC

GAGGAACGAATTTTGGTTCCAGGCGGTTCGTGGCGGTATGGGAAATGACAACCTTCAA  
TCATCTACGTTTCAAACACCACGTTTGGCCAAACCGGGTGAAAAAGGACGGGAAGGT  
TGGATGACTTTGGAAATGAAGGTTCTTGCTGATGTAGGTTGGTTGGCTTTCCGAATG  
CAGGAAAAAGCACCTTGCTTTCAGTAATTCAGCGGCAAAACCTGAAATTGGTGATT  
ACGCGTTTACCACATTGCGTCCTAATCTTGGAATTGTAAAATACCGCGATTACCGTTC  
GTTTGTAAATGGCTGATATCCCCGGAATTATTGAAGGTGCACACACCGGAAAAGGATT  
GGGATTGCGGTTCTTACGTCACATTGAACGTAACCTCGCTGTTGTTGTTTCATGATTCCG  
GCCGATTCGGATGATATTCACAAAGAATACAACGTTCTTCTCAACGAATTACAGCAG  
TACAATCCGGAATTGTTACTCAAAGAACGTTTGTGGCAATTACTAAATCGGATATG  
CTGGATGACGAACTCAAAGAAGCTATCAGTTCAGATTTACCAAAGATTCCATACCTT  
TTTATCTCATCGGTGGCCGAACAAGGTTTGGTAGAACTCAAAGACCTCATTTGGTGC  
AAACTCAACCATGATTGA

>maker-scaffold1704\_size25235-snap-gene-0.24-mRNA-1

ATGTTGAAGAAGCAGTCGATGATCAAAAAGTGCCAAGTGCGGATGGGCAACGAGGA  
ACACCGAAAGGATGAGCAGACTTCGCGTGTGATGGAGAAGGACGGCAGTCGTTCC  
ATCACGACCAGCAGGCCCTTGTGCTGCTCGTAGACCCCCACCGAATTGGGATGGACC  
AAGCCGTAAAGGAAAAAGGCGGATTGGAGGCAGCTCGAGCCGAAGGTACCGCAGAT  
GAGGATGGCCACGGCGGCGGCGAAGACCCGGAGATCTTGTGGAGATCTTGTCTGTC  
GTCGTTGGAGTAGTCGTGGTGAAGTCCGCCAGGGAGAATTCGGCCAGGGGGAAGG  
GTTCTACATCAGCCGATCCAATGATTGTGCCCTCGGAGTGCCACGGTTGATGTGCGG  
GATGAGTGGCGAGCTGGCCGTCGTCAGCCAGTTGTGGTACCGTTGCAGCTGCTGGG  
CGTGGTTGTCGTGCTCCGGCTGCATCGGCGACTCTTGGGAATGGGGTTCGGTGAACG  
ACGCCGTCGGTCCGGCGGTGAGGGTGCATCCTCCCCGAAGAATCCTACAAAGGTGG  
AGGAAAAGGCACTACCTTGATGGCAGATGAAGTCAAAGTTCTGGTTGAACTGCAACT  
CCGTGTGGTAGACGGCCGTGAAGTGGCCGGGATCGTTGCTGCTGCTGGCGACCGGCT  
GTGGCGATTGACGATCGCGCGACTTGTCAAAGTTAAACCAGTAGGCGGACTGAATGG  
GCTGGAAAGGACCCGGCGGATCCGCCATCAGCAGCTGATGGGTTCTGACAGCAGTTG  
CGGCACGTCATCCGTCATCGCATTGCGCCGGAGAGGTTGAAGAGCTGGGTGA  
GGACGACGAGGATGGACTGGAGGAAAATTGA

>snap\_masked-scaffold4566\_size15214-processed-gene-0.9-mRNA-1

ATGTTGAACGCGTATCCCGACTTCGTAACATTAATCCAAATACCTTCGATTTTGACCC  
AAATTGCGACGATATTCAATCACTGAAGGTTTCGACGCCAGACCCTGCGGGCGGAAT  
CTATTGACGCACGGATAGCCAGGCTGGAGAAATTAGCCTCCTGGCTTCGTCAAATG  
AGCGGAACTGGAGGAGGCCGTCTTCAAGGACCTGGGGAAACCGGCGATGGAGGTA  
GGCACTTCCGAACCTTTCCCGGCGTACGCTGAGATCAGCCATGCTTTGGAAAACATT  
CGTCGGTGGACCCGGCCTGTCAAATCGATGCTCCCTTAACCTTCATCGGTACCCGGT  
CGGAAGTACGTTATGAGCCCAAAGGCGTTTGCCTCATCATCGCACCGTGGAATTACC  
CCTCAACCTCTGCATTGGTCCGCTGGTATCGTGCCTCGCGGCAGGCAATGTTGCTCT  
AGTTAAACCATCGGAGATGACACCACATACAGCAGCCTTCGTTTCGAAGCTTGCCAA  
TGAAGTGTTGACAAAGATGTTGTTGCTGTTGTTGAAGGCGACGCAAGCGTTGCCAC  
AGAATTACTTCAGCTTCCTTTCGATCATACTTCTTTACCGGAAGTCCGGCTGTTGGA  
AAAGTTGTGATGAAGGCTGCGGCCGAACGCCTGGCTTCTGTTACGCTGGAGCTTGGT  
GGTAAATCGCCTGCTATTGTTGACGCCACGGCTAACATTAAGATGCAGCCAAACGC  
ATTGCCTTTGGTAAAGTTCCTGAATTGCGGGCAGACCTGTATAGCACCCGATTACGTAT  
TGATCGATCATTCCGTAAAGATGAATTTCTGGAAGTGTGAAGCAGAATATTGCAG  
AGCAGTTCAACGATTATTCGGGGAGGATAATCAATCAGAGGCATTCGGATCGACTGA  
AGACCTGCTTGATGATGCGAAGAGCAAAGGTGCGGTGGAAGTCTTATCGGGTGAG  
AGAACGATTCTTGTGAACGTTACCAACGACATGCTCGTGATGCAGGAGGAGATCTTC  
GGACCAATCCTGCCTGTTATACCTATTGACACCAAGAATGCCGTTGAGTTTGTTAACA  
GCAAGCCGAAGCCGCTCGGCCTGTATATCTTTCAACCAGCTCTTCATTTAAGGAAG  
CCGTAATAAAAATACTTCGGCGGGAGGAGTCTGTATCAACGATTGCGTTCCTCAAT

TCATACATCCCAACCTTCCTTTTCGGAGGCGTTAACAATAGTGGCATCGGCAAGGCTC  
ATGGTCATGCCGGCTTTCTAGCGTTCTCGAACGAAAAACCAGTTGTTTCGTCAAAAAC  
GCGGCTATTCAAACGCCTACCTCTTTTATCCGCCATACACCTCATTTAAGAGGAAAAT  
ACTGGCACTTATTCTGCGTTGGTTTCTGTAA

>snap\_masked-scaffold14864\_size6151-processed-gene-0.3-mRNA-1

ATGTTGAACCTTCGAGAATACCGGCGTCAGGGACAAAAGCTTGGCGATCATCTGCCT  
TGGGCGCTGTTGGTGGCGCCCGGAATCGTGCTCAACAAGGACGCCAGCTTTC AACGA  
ACGTTCCGCTTTCGTGGTCTGACCTCGAAAGCGCGACGGACTCCGA ACTGATGGGG  
GCAAGCGCGCTCTCAACAACGTCTAAAGCGTCTTGGCTCCGGTTGGGCGCTGTT  
TTCGATGCGGCGCGCATTCCAGCCCTCACATAACCTGATTCTAGTTTCCCCGACCCGG  
CAGCCTGTTGGTAGATGAGGAGCGTAAGGCTTCATTT CAGGGAGGAAAGGACAGG  
TATGAGAACGTTACCACCTGACTCTGATGATTTGCCATCGCCTGATGGCGTGGACC  
GGTTGCAACGTGCCTTTGTGGAAAGCGCAATCGAGGAAGAAGGGCGAAACTGGCGC  
GAGGATTTGCGG

>snap\_masked-scaffold10019\_size9041-processed-gene-0.10-mRNA-1

ATGTTGAACACCCATGCCCGTGAAGTGCAGTACGCGCGCCCTGCCGCCGAGGACGAT  
CTCTTTCAGCTGTGGTAGCTGGTCTCTCGCGACGGCAGAAGACGCTGCCATGTGCG  
TACTTCTACGACGAGCGCGGCAGTGCTCTGTTTCGAGGCCATCACCGAGCTGCCGGAA  
TACTATCCGACCCGCACGGAGGCTGCGATTCTGAAGGCGAGCGTCGGCGAAATGGTG  
GAGGGCATTCTCCCGGCGCGGTTCTCGTCGAGTTCGGTTCCGGCTCGAGCCGCAAG  
ACCGAGGTGCTGCTGAGAAAGCTGCCATACCTGCGCGCCTATGTGATGATCGACGTC  
TCCGAGAGCGCGCTCGACGACGCCAGACGGCGCCTGGAGCGTCGGTTTCCCGGGCTC  
GACGTGCGACCGATCGTCGGCGACTTCTCGTTCCCGATCGCGATGCCGGCTGATCTG  
CGGTCCGGCCCCAAAGTCGGATTCTTTCGGGGCTCGACCATCGGCAATCTCACTCCG  
ACCGAAGCACAGCGCTTGTTCGCGCTCTTCCGAGCCGTGCTCGCGCCGGGCGGGCGT  
TTGATCGTCGGGGTCGATCTGCGGAAGGATCTGAATGTGCTTCTGCCCGCTTACAAC  
GATGCAGCGGGCGTCACGGCGGCATTCAATCTGAACCTGCTCGATCGCATCAACCGC  
GAGATCGGACCGACGTTTCGACCTCCGGA ACTTCCGGCACGAGGCCATCTACAATGCC  
CGTGACGGCCGCATCGAGATGCACCTGGTGAGCCTCGTCGCGCAAGATGTGCACATC  
CGTGGCCGCACCTTCTACTTCCAAGAGGGCGAGACGATCCACACGGAGA ACTCCTAC  
AAGTACTCCATCAGCCAGTTCGCTACCTGGCGGGCTCGGCCGGATGGGCGCTCGAG  
GAGACGTGGACCGATCCACTCAATCTCTCAGCGTGACGCACTGACGTTTGGCGGC  
AACGAGCCCCGGAGCCGCGAATGGCTCCGGGGCTTTCGTTTTCGATTACTGCGTCGT  
GCGAAGGCGAGTGGCCAATACGGCGGCGCAGGCGAGCGCAACGCCAATACCGGTGA  
CGCACGCCGGCCAGCCGACGCGATCGAAGGCCTGACCGAGCACTGCGCTGCCGACC  
AGTCCGCCAGGAAATAGGAGGCGAGATACAGTCCGCTCGCGGCGCCCCGGTTCGCT  
CGTGGCGGCACGGCTGACGAAGCCGGTGGCCGTTGCTTTCGCGCAAGAAGGTGCCGA  
CGCCCATCAGA ACCATGCCGACGAGGACCAGCGACAGGCGAGGTGCAACGAGCAGC  
GGCAGCCCTACAGCGGCCGTCAGCAAGCCAACGCCGAGAGCGGATCG

>snap\_masked-scaffold19802\_size3900-processed-gene-0.3-mRNA-1

ATGTTGAAACCCCGATCCTCACGCCTTTCGAATACTAAAACCATAATCGCAGTTGTTT  
TCTCGCTGACCGCAGCCCTCACTTTGCAGGTATCTGCGCAGGCTGACCGGATTA  
AATCGTTTTCCGAGATAACAAAGAAGGTTGAGCCCGCTGTCGTCAGCATTGATACGA  
AGGGCAAACCCAGCCCGTCGCGACTCGCGTTCCTGCTCCGCAGAGCAGCGGATCTG  
AGGGGAATGAAGTGATGGATTTTCTGCGGCGTCAGATGCAGCAGAAACCTGTT  
CGGTAGGCAGCGGATTTATTGTCGAAAAGTCGGGATACATCATCACGAATGCCACG  
TTGTTGAGGATGCGGCGAGAATACCGTCAAGCTCGATTCCGGCGAGGAATACCCG  
CGAAGGTGATCGGAACTGACGAACAACTGATCTGGCTGTAATAAGATCGATGCA  
CCGAAAGACCTGCCGTTTCGTGAAGTTTGGTGATTCCGGACAAAGCTGAAGTTGGCGAT  
TGGGTTTTGGCGATCGGTTCTCCTTTTGGCCTGACAAAAACGGTCACGGCGGGCATC  
ATTCGCAGAAGCAGCGAGAAACGCCGTTTTCGTCGCTCCGCTTTTCAGAGATTTATACAG

ACGGACGCCGCGATCAATCGTGGAATTCGGCGGCCCGCTCGTCAATACCGATGGC  
GAAGTTATCGGCGTAAATTCTCAGATCGCGACTTCGACGGGCGATTACAACGGGATT  
GGCTTCGCACTTCCTTCGCGGGTTACGGAAAGCGTACTAAGTCAGATCATCAAAAAC  
GGGAAGGTCCGTCGCGGGTATCTCGGTGCATACCTTGATTCTGTAAAAGTAGAATTT  
GCCAAGGTTTACGGTCTAAAGGACGCGAAAGGAGCGATCATCACGGATGTTTCGTGAT  
CCCGACAGCCCGGCAGCGGTTGCAGGGTTGAAAGTAGGCGATATTGTAAGTGAATTT  
AACGGCCAGCAAGTCGAGTCAGCGCAGGACCTGATCGGCAAGATCGCAGCTACGCC  
GCCCCGATCAGACGGTCAGCATCAGCTTTATGCGGGAGAATGGTGACAAGCTTGATCC  
CAAAACGGCATCAATAAAGCTTCGCGAACGCCCGACAAACCGAGTTGCTCGCGACG  
ATGATGAAGGCGAACGCCGTGTTTTGCCGGTTGACGGCGTTAAAGGTGATCCGAAGC  
CATTCGGCCTTACACTCAGCGAGCTTTCGCCGGTCTGGTTCGAAAAATACAAGCTTG  
GCACGCAGAAAGGCTTGGTCGTTAAGGACATCAACCCCAAGTTTTATCGCGGACG  
TAAAGGATTCGCTCGGCGGAGAAGCTCTACTGGAGGGTGATCTTATCCAAAGGATAA  
ACCGGTCAGTGTTCGGATCTGAAGGCATTTAACGAGACGGTACTAAGCTGAAGA  
CCGGTGACCCAGTTGTACTGCAGATAATCACATAAATGTTTCGTGCAGGTATTCAGG  
AGACCAAGATCGTCCAATTCACGGTCCGATAG

>snap\_masked-scaffold7963\_size10525-processed-gene-0.8-mRNA-1

ATGTTCTTACCCGCATCAGCATCAACAATCCGGTGCTGGCCACCATGATGATGGCG  
GCGCTGATGGTGCTGGGCCTGTTTTCGCTCAACCGCCTGCGCGTCGACCAGTTTCCCG  
ACATCGAGTTTCCGGTGGTGGTGGTACCACCGAGTATCCGGGCGCCACACCGGAGT  
CGGTCGAGACCGACATCACCCGGCCGGTCGAAGAGGCGGTCAACACCGTCTCCGGC  
ATCAAGACCCTGACCTCGCGCTCCTATGAAGGGCAGTCGGTGGTGGTATCGTCGAGTTC  
GACCTCACCGTCGAGCCGGCGCGGGCCGCCAGGATGTGCGCGAGAAGATCGCCAT  
CGTCAAGGTGGGCTTCCGCAAGGAGGTGAAGGAACACGCATCTCGCGCTTCGACCC  
GGCGGACCGGCCGATCATTTCCTTCTCGGTATCGTCCGACAAGCGCGGTGCGCGCGA  
CATCACACGCTTTCGACCAGTTGATCAAGAAGCGCATCGAGAACGTGCGCGGGCGT  
GGGCGCGGTACCATCGTCCGGCGCATCAAGCGCGAGGTGCAGGTGCAGTTGCGGC  
CGGTCGAAATGGAAACCCTGGGGCTTTCGTCGACCAGGTTCATCAACGCCATCCGCA  
ACGAGAACCAGGAAGTGCCTGCCGGCGCGATCCGCTCGATCGAGCGCGAGCAGGTG  
GTGTCGATCAAGGGCAAGCTGAAATCGGTGGACGACTTCAACCGCATCATCGTCGGC  
CGCCGCGGCGGCCAGGCCATCACGCTGCGCGAGGTGGCGCGGGTGGTATCGACGGCCA  
GGAAGAGCAGGAGAACCCTCGCGCTCTACGACGGGCGCCGCGTGCTGGCCCTGGATA  
TCCAGAAAGCGCAGGGCCAGAACACCATCGACGTGACCGATGCGGTCAGCAGGCG  
GTGGCGGCGCTGCAGCGCGAGCTGCCGCCGACGTCAAGCTGGCGGTGATCAAGGA  
CGCCTCCGTGCCGATCCGCACCGGGTGGACAACGTGCGCCGCACCATGCTTGAGGG  
TGCGGGCCTGACCATCCTGATCGTCTTCTGTTCTCAATTCGTGGCGTTCAACCGTC  
ATCACCGGGCTGACGCTGCCGATCGCCATCCTGGCCACCTTCTTCTCATGGACATGG  
CCAGCGTCACCATCAACATGGTGAAGCCTGATGGCGCTCTCGCTTGGCGTGGGCCTCT  
TGATCGACGACGCCATCGTGGTGCAGGAGAACATCGTGCGCCACGCCGCCATGGGCA  
AGAGCCACAAGGCCGCGGCCATGGAGGGCACGCAGGAAATCGGCCCTGGCGGTGTTT  
GCCACGACCATGTCCATCGTGGCGGTGTTCTGCGGGTGGGCTTCATGGGCGGCATC  
ATCGGACGCTTCTTCTATTCGCTGGGCATCACGGTGGTGGCCTCGGTGCTGGTGTGCA  
TGTTTCGTCTCCTTACCCCTCGACCCGATGCTCTCATCGGTGTGGCCCGACCCCGCCGC  
CCATGGCCCGCCGCGCGGGCCGATCGGCAGGCTGCTGGCGCTGTTTCGACCCGATGGT  
CCAGGCCGTCTCGCGGCTCTACCAGGCCCTGCTGGCATGGGCACTCAGGCACCGCGG  
CGTACCCCTGGTCGGCGCCATCGGCATCTTCGTCGGCAGTTTCGCGCTGGTGGCGCTC  
CTGGGTACCGAGTTCGTGCCGACGGCGGACTATTCGGAAACGACTGTGGCCTTCAG  
ACCCCGGTGGGTTCTCGCTGGAGTTGACCGAAGCCAAGGCGCGCCAGGTTCGACGCC  
GCCCTGCGTGAATTGCCCGAAGTGTCTACACCTACACCACCATCAACACCGGCATC  
ACCCTGGGCAAGAACTACGCAAACGTGTACGTCAAGTTGAAGCCACGCAATGAGCG  
CACGCGCTCCAGCACCTGATGACCCAGCCGCTGCGCGAGCGCCTGGCCAGCATCGC



CGGCATCACCGTCACCCATGTGGGGGTCAACAACGCGGTGGGCGGCACCAAGGTGC  
TGGTGGTGGAGCCTGCAGGGGCAGGACCTGGCCGAACCTGGACCGCTATTCGGCCGAG  
GCCAAGGCGCGTCTCAAACAAATCCCCGGCCTGGTTCGACCTCGACTCCTCGCAAAAG  
CCGGACAAGCCCACCATCGATATCGACGTGCGCCGCGAGCTGGCCTCCGATCTGGGC  
GTGGGCGTGGCGCAGATCGGCGCGGCGATCCGGCCGCTCCTGGCCGGGAATCGGT  
CAGCACCTGGAAGGCGCCGGACGGCGAGAACTACGATGTGCGCGTCCGCTCGCCC  
CATCGGACCGCCAGACCATCGGCGACCTCGACCGCATCATGCTGCAGAGCGCGCAG  
GTCAATCCGGACGGCACACCCAAGATGGTGGCCCTGCGCCAGGTGGCGCAATTCCGC  
CCC GCCGGCGGCACCAGCCAGATCAACCGCAAGGACCTGACGCGCGAAGTGCAGAT  
CGACGCCAACGTGTTTCGGCCGCTCGTCGGGCGAGGTCTGGGCGCGACATCCAGAAAG  
CGTTCGACGGCATGGAATGGAAGCCCGGCTACCGCTACGTGATGGGCGGCTCGACC  
AAGGACATGAAGGAATCGTTCTCCTTCGCCCTGACCGCGATGGTGTGGCGATCATC  
TTCATCTACATGATCCTGGCCTCGCAGTTCGCCAGTTTCTGACAGCCGTTGGCGATCA  
TGTCCTCGCTGCCCTGACCCTGATCGGCGTGTGGGCGCGTGTGATTTTCCGCAG  
CACCTGAACCTGTTCTCGGTGATCGGCGTCATCATGCTGATGGGCCTGGTGACAAA  
GAACGCGATTCTCCTGATCGACTTCGTCAATCACGCGCGCGCAGCCGGCATGGCGCG  
CAGCGAGGCGATCCTTGAAGCCGCCATGTGCGCCTGCGCCCCATTCTCATGACCAC  
GCTGGCGATGATCTTCGGCATGCTGCCGCTCGCCCTGGGGCTCTCGGAGGGCTCGGA  
ACAGCGCGCACCGATGGGGCAGGCTGTGATTGGTGGCGTGATCACCTCGTCCATCCT  
CACGCTGGTGGTGGTGCCG

>maker-scaffold1432\_size27383-snap-gene-0.25-mRNA-1

ATGTTCTCTTTGCGCCGTCTAGGTGCGTGCACAGTGATCAACTGGCGACCTTACAGTG  
TCTCAGTGGACCGCAAAAGTGCCACAGCAGCCGACGTCCAGTCATCACTGCCCGTAG  
CGTGCGGATCACAAATGTGACACCGATTTCGAGCTACTGTGTGCGCAGTCATGTGCGG  
CCTGCGACGGGCAGACGGTTCGCGGGCGCGGACACCCCCGTGTCTCGGCGCTACAACC  
TCGGCACTACCAAGGGGACCATGAAGTTCTCCTACCAAACCTACTCCATCCCTGACC  
GTGTGACTGTGCTTACGAAGGGAAGGCGCTCTACGACAGCGGCTGTGTGGGCACTT  
CCCAAAGCGTGCCGATCTCGTTCAGCGGCTCGACCAAAGAGATGCGCGTTCGATGTCG  
AGCCGAACCTGCCAGGGAACATCTGGGACAAAATGGTATTTACCCCTCCCTTGCCCGT  
CACCTGTGACGCTGTCTCCACCAAAGGTCAGGGTCAAGTCCGCCTCATGGGAGGCA  
TTCACGAGATTCAGGATGGCGGCAAGGTGTACATCGATAAGGAGGGCAAAATGCC  
GCTGTAACGGCGTACTACTGTGACGGGGCAGCCTCTGTACACCCAACGTGCAGTGG  
ACGCTGACGATTGCGGCCTTTTCATCGAGCACTGTTGTCTTCTGTGAGGAGAACTTC  
TCCGCGGAAGCGGTGCCACGTGGAAAATCTTCCCGGGCGCCACCACCGCCGTCCAAG  
GCGGTCAGGCCAAGCTGACGTGGACGGTGAACCAGCAGGCCGCCGGGTTCGGTTCATT  
TTCCAAATTCTCGGTACCAATCCGACGCAACGGGACGTCAAAACACTTGTACGCGAG  
CTGTCCATGCTGTGGTACGCTCCGTTGATTGCCGTCCACGAAACCGGTGCGAACGGG  
CAATTTGCAAAAGCCACTGGCCTGCCTATAATTTCTGTCGATCTCAAAGGTACGGGC  
ATCTTTCAGCTGACCAATCCGCGAGCTACCTGCGAGCAGACGTGGAGCTGGACGGAG  
AACGTCAGAGGCGGCTTGAGCTTGATGCAGAGCCAGGCCAACCTCGCATGGAATTG  
GATGAACAAACCCGAAACACCAAAACTCGGGCAACGGCTCCAGGCGGTGGCGCAGA  
TGGGAAAACCGGTGCCGCTGCCACCTGAGCGCGTCCGGTTCAGTGGTCTTCGCCGACG  
GCACCGCTCGGACCATCGAGGACGACGTGGCCATAAAAATGTTCAACGGCGCCACA  
CAGAACTACGTCGGATGGGACAACACCAATCGCGAGTGAAGTTTGTTCGACTGAAC  
GACTACAAGCCGGGCCCTTTTAACTACGTTGAACGTGTCTGTAACGCTCAAATTTGA

>snap\_masked-scaffold2631\_size20523-processed-gene-0.10-mRNA-1

ATGTTCTCTTTATCGGCGATGTTGTGCGATCTTTGCTCCCGTTTGCCGGAGCTTATACG  
CCAGCATAATGCCGAGTGC GTTATTGTAAACGGTGAAAATGTGTGGGAAGGCAAAG  
GCATTAACGAACAGGAAGCACAACTTCTTTTTGATGCGGGCACACATGTTATCACAA  
CGGGTAATCATATCTGGGAAAACCTGGAAAATCCCCGCCGCTTCTTGCTACAAATCCAC  
GTATTATACGTCCCTTGAATTATCCGCGCGAAAACCCCGGACGCGGTTTTACTACTAC

CACCATCGGCGATGGCATTATCATCGGCGTGTTACAATTGCAGGGGCGCGTGTTTAT  
GCAAGCCATTGATTGCCCTTTAAGGCAGCGGACTTTGCCCTGCAAAAACTCCGCGA  
GCAGACCAATATCATCATCCTTGATTTCCATGCCGATGCAACAGCCGAGAAGATAGC  
AATGGGCTGGTATGTGGACGGACGTGTAAGTGC GTTGCTGGGTACGCATACGCATAT  
TCAAACCAATGATGCACGCATCCTGCCACAAGGTACGGCGTATATTACCGATGTAGG  
CATGACCGGACCGTATAATTCAGTAGTGGGTATGAACACCGAGATTGCCCTGAAACG  
CCTGTTGCTGCAAACCGCACATAAATACGAGCTTGCCAAAGGCGACTACCGTATCTG  
CGGAGCGGTTGTGAGCATTGATGCCGATGACGGCAGGGCAAATTCTATCCAGGCTAT  
CAGCATACCCTGTGGCAACGAAGAGCTAAAAATGGCGGGGTTGACTCCGCCCTCACA  
TTCCCCAACCGGCACACAAGAAAACCCGCCTGCTTAA

>maker-scaffold11015\_size8478-snap-gene-0.11-mRNA-1

ATGTTCTCTGTGCACGGCACGATTGTCCCCTTCTGCGACTAGCGGGAAACCGAAAC  
ATTCGCGTTGTGCTCGCGCCGCGCGGCATGCTAAAACCTTCCGCGCTTAAAGGAAAA  
TGGCTCAAAAAAATGTGTGGCTGCAGTTTCTAAAGGCCAGTCGACTAAGTAGGAAA  
ATCACTTCCACGCAACGTCTGCCGACGAGGCCAAGGAGATTCAGCAGATATTCGGG  
AACTCACAATCGCTGAGTGAATAACCGAAGTTGCCGAGGTATCCGTTGGCCAACTT  
CCTGATCGACAAAAAAGCAAAGGTGAAGCCAAGTTGGTATTTACCGGTCGGGTACA  
CCCAATCAAGAACCTAGACTATGCCTTGAAAGTCCTCAAGAATGTTTCTGCCTAAA  
ATGCACGTTGGATGTAGTTGGCCCTATCGAAGATAGTGACTACCACAGAGCCTGCCA  
ATCGATATGTCGGGAGTTGCCATCGAATGTCACGGTCAACTTTTTAGGTAACCGAAC  
AAATGCGGAGGCCTGTGAAATCCTCACAAGTGCAGATGCCCTGATTCGCCGACGTT  
AGAGAGACGCTTAGCAGATTATGACTCGGCTGATTTCAAACCGGGTAGAGGTATCGT  
CGTTCGCGTTCTGTGGTACGTTACTTCGTTACTGATTTTCGAATCCGGCTGGTTTCCCT  
TATCACGCATGAAACGCGGCATTCTGAGATTGTTTGGCGCTCAAATAGGCTGTGGGG  
TGGTCATTAAGCCCAACGTTTCGCATCAAGTTTCCCTGGAAATTGACCATCGGAGAAC  
ACTCGTGGGTAGGCCAAGACGTATGGATAGACAACCTCGATCATGTAACCATCGGTA  
ACAATTGTTGCATCTCACAGGGTGTATACATTTGCACAGGAAGCCATGATCATCGGT  
CGGCGACATTCGATCTGTTGACCGGCCCATATAATCGTTAAATCTAATGCATGGGTAA  
CCGCGAAGTGTGTTCTTGGCAGGTGCCATCGTTGAAGAAGCGGAAACTCTTACTG  
CAGGCACTTGTGCGCAAGAAAGATAGCTCCGTCCAGCTAACGCGATATTGTCACCGAT  
AA

>snap\_masked-scaffold10487\_size8781-processed-gene-0.9-mRNA-1

ATGTTCTCTAAAATCCTGATCGCCAACCGCGGGGAAATCGCCTGCCGGGTGATCAAG  
ACGGCTCGGCGCATGGGCGTCAAACGGTCGTTGTCTATTCCGACGCTGACGCCAGC  
TCGATGGCCGTGGATATGGCGGACGAAGCCATTACATCGGCGGCTCGCCCGCGGCC  
CAAAGCTATCTGGTGCAGGACAAGATCGTCGATGCCGTGCGCAAGTCGGGCGCCGA  
GGCCGTCCACCCGGGCTTCGGTTTCTCTCGGAGAACGCCGGTTTCGCCAACGCCTT  
CAGGACGAAAAGATCGTCTTCATCGGCCCAATCCGCACGCGATCGAAGCCATGGGC  
GACAAGATCACGTCGAAGAAATTTGCCGCTGAAGCAGGCGTCAGCACTGTTCCCGGC  
CACATGGGCCTGATCCAGGATTCGAAAAGAGGCGGTGAAGATCGCTGACTCCATCGGC  
TATCCTGTGATGATCAAGGCGTCAGCGGGCGGCGGCGGTAAGGGTCTCCGCATCGCC  
TACAATCCGCCGAAGCAAAGAAGGCTTCGACGGCGCCCGCGCTGAAGCCATTGCC  
TCGTTCCGGTGACGATCGCATCTTCATCGAGAAGTTTCGTCGACCAGCCTCGCCACATC  
GAGATCCAGGTGCTCGGCGACAAGCATGGCAACATTGTCTACCTGAATGAGCGCGA  
ATGCTCGATCCAGCGCCGAACCAGAAAGTATTCGAAGAAGCGCCGTGCGCCTTCT  
CACGCCGAAACCCGCAAGGCCATGGGCGAGCAGGCCGTGCGCTCGCCAAGGCGG  
TGA ACTACGACAGCGCCGAACCGTTCGAATTCATCGTCGACGGTCAGCGCAATTTCT  
ACTTCTCGAGATGAACACCCGCCTGCAGGTCGAACACCCGGTCACCGAACTCATCA  
CCGGCTACGACCTCGTCGAGCAGATGCTGCGCGTCGCCCGCGGCGAGAAGCTCGCGA  
TCAAGCAGAAGGATGTCGGCATCAAGGGCTGGGCGCTGGAGTCCCGCATCTACGG  
GAAGACCCGTACCGCGGATTCCTGCCAGCATCGGTCGCCTCAAGCGCATGCGCTTC

CCCGCCGAGGGCAAGATTGGTGAGGGCACGGTCCGCATCGACACCGGCGTCCGCGA  
AGGCGACGAGATCTCGATGTTCTACGATCCCATGATCGCCAAGCTGATCACCCACGG  
CAAGGACCGTGCGACCGCCATCGCCACGCACACAAAGGCGCTGGAGCGTCTGGAAG  
TGCAGGGCATTTCAGGACAATTCGCCTTTCCTCGCCGCCGTGCTCGACCAGAAACGCT  
TTCAGTCCGGCAAGATCACCACCGGCTACATCAAGGAAGAATCCCGGACGGTTTCC  
ACGGCGCCGCCGCCTCTCCGGAAGTGGAAGCCTCTTCGTCGCCGCCGTGCCTACG  
CCCACGCCCTCAATGTCGGCCGCGCTGAATCTACCTCGGGCCGCGTCGAGCCGATGA  
AACCGCTGCGCAAGGACTGGGTTGTCATCGTCGGCGCCAAGCACATCCCCATCCGCC  
TCGACTTCCAGATGGGCCGGGCAGACATCACGCTCAGCGCCACCGGCGAGAAGCTTC  
AACTCGCAACCCAATGGCGTCCCGGCATCAACCTGATGGACGTCAGCTTCGGCGACC  
AGTCCTTCGCCCTCTCCATCGCCAACGCGCAGGAGGGCTTCATCCTCCGCCGCCTCGG  
CGTCGAAGCGCATGTGAAGGTCTGCACCCCTGCCAGGCCGAGATGCACGCCCGCCT  
CCCCGAGAAGCAGAAGCCCGACACGTCAAAACTCATCATGAGCCCGATGCCGGGCC  
TGGTTGTCTCGGTGGCCGTCGTTGTCGGTCAGGATGTGAAAACAGGGCGAAGCGGTCT  
GCATCGTCGAAGCCATGAAGATGCAGAACATCATCCGCGCCGAAGCTGACGGCGTG  
GTGAAAGCGGTCAACGCCGCCGCCGGCGCCAGTGTTGCCGCCGACGAGGTGCTGGTC  
GAGTTTGCCTGA

**Metazoan coding sequences used for codon usage calculations.**

>maker-scaffold10212\_size8922-snap-gene-0.1-mRNA-1

ATGTTTTTTGGCGCCGATGTTACGCATACTGCTCGGCTGAACGTCCATCAATTG  
CAGCTGTTGTTGGATCACGCGATCCAATAATTCGCTCTATGCAGCTCGTCTTTGCGA  
ACAATATCCGAAATTGGGTTCGTTGTTTCGATGGAAATCATCAAGGATTTGGACAAGAT  
GGTTATTGATCTTCTTCAATTATTTGCTAAATCATGCGGAAATCGTCTACCCAACAAG  
ATCGTCTTCTATCGTGATGGTGTTCGATGATGGTCAATATCAAAAAGTGCTCGACAAT  
GAAGTGGCGAAAATCAAACAAGCATTTCGAACTATCTATGTCAATCGACAACCACCG  
AAACTCACGTTTATTGTTGTTAAGAAACGACACAATACACGATTCTTTGTTTACGATG  
GACAAATGACGAAAAATGTCGAAGCAGGAACAATTGTTGATCAACATGTCACACAT  
CCATCGCAATTCGATTTTTATTTATGTTACAGGCAGCACTTATGGGTACATCTCGTC  
CAGCGCTCTATCACGTCCTTACGATGAAATCGGTTTTACCAGCGATGAAGTTGAAC  
AATTAACCTACTGGCTTTGCCATACGGATGCTCGTTGTTTCGAAAGCAGTTTCAATTCC  
AGCACCGGTTCACTACGCACATTTAGCCGCTTATGCATCTCGTACATTTGACTTCGAT  
GATAATGTTCGATCAAAATAGTGGTAATAGTGATGACGATGGTTTTGTTGAAAACGTC  
GAGAATGTTCCGTCGACGATATTA AAAACAAA ACTCATGAATGCGGCTGCGCACTCG  
ATAGAAGTTGCTAATGCAATGAATAATATCGATATCGAGTAG

>maker-scaffold2174\_size43691-augustus-gene-0.4-mRNA-1

ATGTTTTTTCTTTGCGCTATATTGTGCGTTGTAGTGCTCTCCAGATCCCTGGCTCAGTC  
TGCAGTTCTGACAGTAAAGACGGAAACTCGGACATATCAGGCAGCTGGTCAACCATC  
CAAAGTAGA ACTTGT CATCACAGTGCAAGATAATTCTGTCCTCAATAATGTTTACTCT  
CAAGTTCCAGTCATCCAAGAGGACATTAAGAATTTTCGGCAGGCTGCTGGTGGCCTC  
TCGACCGAGGATATTGTCAAAGCTGGCCTGAAGAGATTTTCGTCAAGAATTTATGAGA  
ACTGAGAGAGTTATAGGAAAAAATATAACATCGACTCCACTACCGCCGAATGTAAC  
AAACGCGGAGACTCTATCGGCTAGCACAAAAAAAAGTGTGCTAGGAGACATTAGCG  
GAATTGACTTTGACTCTTCCAACAACACAAAGGATTTTCGCATTTAACGCGTTCATCGA  
CGACGACAAGCTCTGGCCAAATGCCATCATTCCGTACACCATAAATGAGGAGGAGTT  
CAGTAAGAGAAAAGCACGATCATTGCTGGCCAACATCATGTACTTGATTGA

>maker-scaffold4092\_size16228-augustus-gene-0.4-mRNA-1

ATGTTTTTTCTTTGCGCTATATTGTGCGTTGTAGTGCTCTCCAGATCCCTGGCTCAGTC  
TGCAGTTCTGACAGTAAAGACGGAAACTCGGACATATCAGGCAGCTGGTCAACCATC  
CAAAGTAGA ACTTGT CATCACAGTGCAAGATAATTCTGTCCTCAATAATGTTTACTCT  
CAAGTTCCAGTCATCCAAGAGGACATTAAGAATTTTCGGCAGGCTGCTGGTGGCCTC  
TCGACCGAGGATATTGTCAAAGCTGGCCTGAAGAGATTTTCGTCAAGAATTTATGAGA  
ACTGAGAGAGTTATAGGAAAAAATATAACATCGACTCCACTACCGCCGAATGTAAC  
AAACGCGGAGACTCTATCGGCTAGCACAAAAAAAAGTGTGCTAGGAGACATTAGCG  
GAATTGACTTTGACTCTTCCAACAACACAAAGGATTTTCGCATTTAACGCGTTCATCGA  
CGACGACAAGCTCTGGCCAAATGCCATCATTCCGTACACCATAAATGAGGAGGAGTT  
CAGTAAGAGAAAAGCACGATCATTGCTGGCCAACATCATAAACCTTCTGAAACCGAC  
AACAGATGGGTTCTTTTTGAGTCCCCGGTTCAACACCGGAATACCCACGACAGGCGA  
AGTGGCGACCACAACGATCGTCGATGAAAACCTGCCC GGACGCCACCATCCGGTCC  
AATTATTGACGATTATAAACACGCTGAGGGCAGTCTAATCTCACATTGCATTCAAGG  
AAAAGTACCAGCCTTGAAGTATTACGTTCTCATTGCCAGATACATCCACCCTGCACG  
GTCATGGTCCATCTACGGAAAACAACACTGCAACCATAGGTAG

>maker-scaffold31\_size143422-snap-gene-0.62-mRNA-1

ATGTTTTTTCTTTGCGCTATATTGTGCGTTGTAGTGCTCTCCAGATCCCTGGCTCAGTC  
TGCAATTTTGACAGTGAAGACGGAAACTCGGACATATCAGGCAGCTGGTCAACCATC  
CAAAGTAGA ACTTGT CATCACAGTGCAAGATAATTCTGTCCTCGATAATGTTTACTCT  
CAAGTTCCAGTCATCCAAGAGGACATTAAGAATTTTCGGCAGGCTGCTGGTGGCCTC  
TCGACCGAGGATATTGTTAAAGCTGGCCTGAAGAGATTTTCGTCAAGAATTTATGAGA  
ACTGAGAGAGTTACAGGAAAAAATATAACATCGACTCCACTATCGCCGAATAAGGA

TTTCGCATTTAACGCGTTCATCGACGACGACAAGCTCTGGCCGAATGCCATCATTCCG  
TACACCATAAATGAAGACGAGTTCAGTAAGAAAAAGCACGATCATTGCTGGCCAA  
CATCATGTACTTAATTTGA

>snap\_masked-scaffold6102\_size12618-processed-gene-0.3-mRNA-1

ATGTTTTTCTTCACGGCTTTTCTTCTCAGACAATGTCGGACGCATTGACTCTGGTTCT  
TCTCATAACTTCCTCATCGTTCCTGCATCGGACACGGAGTGTCTGGCGGAGGACGG  
AGGAACGGCATTTCAGCCGCTACGAAATACATCGGACTTCATCGAGACGCTCCCGAC  
CATCGCGAAATTTCCGCCGACACGAGAGGTCAAGTGGACACGCTAACCATATGCGT  
CATTGTGGAGAGCGATTCTTACTTCACCACTATGCAGCGGACGTTGGCGGTGGTGA  
CTTGTCTGTCTCGAATGTCAACGCTTATGTTTTGCCCAAATCTCTCAGAGTTCGCGCT  
AAATTCCAGTCCGCGGGGCCATCCTGTTCCAAACTCAGTATTCGGTGATTTCCAGTG  
TGATAAGCTGCTGCATTCCGGGACTACCTGTCATGCATTTCTCGGAGCAGGATGTGC  
ATCGACTGCGTCCTCCTTATACGGAATAGCGGACAGCCTGAACACAATTTTCATCGG  
CACACCTTCGGCCGGGATGAACATGCTGGCTCTGGACGCGAGTCAAGACTACTTCC  
TCTGCTGATCGCGATGGCCTTCGAATTTGGCGACCTGGCAGACGCCATTGTGTTGATC  
TTCAATCGCTACAATTACACACATTTCCGCATCCTCCGTGACGACAGTCAAACCTACT  
TCAATCTACTATCCAAAGCAATCATGTTCAATATCCTCCAAGATGATCTATCGCTCGT  
GCAGAAGTACGCCAACTGCCATTCACCAGCACAACTTTACCACAAAGGATTACGA  
ACGGATGCTGCGCGATGCCGCTGGTCTGCTCGAGTAATTGGGTTGTGCATGGCGGC  
GGACATCATCAGGAAAGTCATGATTCTAGCAAGCGGTTTGGGCTTTGCAAATGGGGA  
GTACGTTTATATCGCAGTGGAGCTTACGACCTGCCCTATTGGGGTAAAATACATTAC  
AGCACCGGGGAGCCGTCTGACAACGTTGCAAGGGAAGCTTACCAAAGCATACTCAT  
CTTTTCCCTGCACATCGACACGGACTCGACTTACGATGATGACTTTGAGGACAAAGT  
CAAGTCGCTGTGCTGAAACGCTACAATTACTCGTTAACGCCCTGGAACAGTTGGA  
CCCGGTGATCACGAGCACGTACGAGGCCATCCAGATCTATGGGCAGGAACTGAAGA  
CGATGCAGGCCAAAGGGTTGGACTACCGCAACGGCACTCTAATGAGCAAGCGTATTC  
GCGGCGCCGGCATGACACGGACCTGGGAAGGGTCATCATTGGGGAAGACGGTCAA  
CGTGACATGGACTATGACATATTGGCGTTCAACGCGGATAAGGGCAAATTCGAAGTG  
ATGATGACGTAATCCAGCATCCCAGCGTGGTCAACGATAAGTTTCGCATAATACAG  
GAACTCAAATGGCCGAACGCGTGGGACGATGCCGCCGGACGAGCCGATGTGCGG  
CTTCCGGAACGATCAGTGCCGTAACGACGCGCTCAGCACAGGCACACTTGCCGCGGC  
GATTATCGTCCCGATAATTGTGCTCCTTGAATCGCCGACCCGCCATTTATACCTTC  
CTCAAATTACGGACATTGCACACGCAGTATAACCCGAACTGGTGGAAAATTAATTCC  
GAGGAAGTCATCATCAAACAGAACCGATCCGGCAGCACAAACGACGTCCAGGAAAC  
CATTCAAAGTAAGTCGACCATCGGGACGTCCAACCTCACCGGCTATTCGCGGTACAT  
GTGCGACCTTTTGGGATCCTACAAGAACACATTGGTGTGCTGACGGATGTCACTCC  
CTTGGCGAAACATGTCACTCCTGAACTGGTCTGCGCAAGTACTCTGCTGAAAGGGGT  
AGCCAGTCCCAATCTGCAAGGCTTCATCGGGATCTCCATGACGCAACAAAACATTTG  
CGAACTCATTGTCTGCGAGGTCTGCGCAAAGGGATCCCTCACTGACGTGCTGGACAA  
TGAGATGTTCAAGTTGGACTGGAGCTTCAAAAACAGCCTGATCCGAGATGTGCTCTT  
TGATGACAGTGTCCACACTAGTCCGATCGTCTCTCACGAAACCTGACGTGCGA  
TTCTTGTCTCATCGACTCTCGATTAGTCTGAAAATTTCCGACTACGGTCTCTCATTCT  
TCCGTGATCCCGCAGACCTCTTGCCGCCAAGAACCTCGACACACCCCCGGCAGAGA  
ACGAATCGAGTCCGAATTATGAGCGGCTGCTTTGGAGAGCACCGGAGCTCCTGCGGC  
AGATAATGCCGGCAAAGGGGACTCAGAGAGGAGATGTTTATAGCTTCGCAATCGTCC  
TCCAGCAGATCATCTTACGAAGCGGACCTTTTGAACCTCCTAGTGAACCTCTGAAAA  
TTTCGAACAGGGAAATTATTAAGAGGTTATAAATTCAAACGTGCCGCCGTTTCGAC  
CCCGGTACCAAGAGCCTCATGCTCAAACGAATTGTATGATTTAATGGAGCGTTGCT  
GGGAGGAAATTCCTTAGAGAGGCCACTTTTCCCAACATCAAGAACCGTTTGAAGA  
AGCCATCGGAGAGGTGCGGTGATAACATCGTCGACGTCCTTTTTAAACGGATGGAAC  
AGTATGCCACCGATTTGGAATTCAAAGTGGCCGAAAAGACACGTCAATTCATGGATG

AGAAGACTCGATCAGAGCAGCTTCTAGGCCAACTCTTGCCACAATCTGTGCGCCGCAG  
CCTTAATGAGAGGCCGAACACGTTCGATCCCGAAGCCTACGAAAGCGTGACTATTTACT  
TCAGCGACATTGTTGGCTTCACGACCATCTCCGCCGCTGGCTCACCCATGGATGTTGT  
GGCCTCCTTAACAGCCTCTACACATTCTTCGATAATATTTTGGAAAAATACGACGTA  
TACAAAGTGGAGACAATTGGCGATGCTTATATG

>maker-scaffold9904\_size9109-augustus-gene-0.2-mRNA-1

ATGTTTTTCTCTCTCTTCCATCCCTTGCGTCGTCGTCGTCCTAAACAACAGG  
CTACACCCAAGCAGATGTTCGGCTTAGCCCTGGGAACCCTGTACGGCAACGTCTTCAG  
CCAGACGACAATCTGCCGTTTCGAGGCACTCCAGCTGTCCTTCAAGAATATGTGCAA  
GCTGAAACCGCTCCTCGCCAAGTGGCTGGAGGAGGCGGACAGCGCCACCGGCTCGC  
CCAGCTCCATCGACAAAATCTCCAGCAGGGCCGAAACGCAAGAAGCGCACCAGC  
ATCGAGGTGACCGTCAAAGGGGCCCTGGAGTCGCACTTCATCAAGCGGCCCAAGCC  
GACGGCGCAGGAAATTACCGCCCTCGCGGACAACCTTCAGCTGGAGAAGGAAGTCG  
TCCGCGTCTGGTTCTGCAACAGAAGACAGAAAGAAAAGAGTAAGTTCAATGACACC  
ACGAACACTCCCCTCTAA

>maker-scaffold3569\_size17619-snap-gene-0.18-mRNA-1

ATGTTTTTTCGGAATATTTTTCGGCGGGCGCGAAAGGATGCCGGAATTGCTGTCTGCAT  
TTCGGACGTACATTTTCTCCACACTGGTTCGGCGTAAAAGTTCCCACGACTGGCTGCA  
ACGACAAGCACGCGATCCCTACGTGAAGAAGGCGCGGATCGTCAGCTATCGTGCTCG  
CAGTGCCTTTAAATTGCTGGAGGTGGATGAACGCTTTAAAATCTTTGCACCGGGCCA  
GGTGGTTCGTCGACCTAGGCGCTTCGCTGTGCTCGCCAATCTCACCCCGGTGATGGA  
GAAGCCGCTGATCCATCCCCTCACGGCCTGGTGTGATCGGGGTTGATCTGCTGGACAT  
TTTGCCCTACCCCGGCGCGGTCTTCCTGCCGCATTCGGACTTCACCAAGGGTAAAAC  
GAAGCGGAAAATCCTCGAGCAGCTGGCGGGACGGCCGGTTCGACGTAGTTCTCTCAG  
ACATGGCGCCTAATGCCAGCGGGATCAGCCAGCTGGACCACGAGGCCATCGTCGGG  
CTCTGCACGGAAGCGTTGCGGTTTGGTGTGACGGTCCTCCGGGAGGGCGGGACGTTT  
TTGTGTAATAATATGGACCGGCTCGGGGGATCAGGCCCTCAGGGCGTTGTTGCGGACG  
CATTTTCGCGGTGGTGCAGGAATGTGAAGCCGCGGCGAGTCGCGATGAATCCTCCGAG  
TTGTATCTGCTGGGGACGGGGTTAAGGGGCTGCCGCAGCAACCGGTGGAAAAAAT  
AAACTCTTGA

>maker-scaffold1699\_size25264-snap-gene-0.23-mRNA-1

ATGTTTTTTCGGAATATTTTTCGGCGGGCGCGAAAGGATGCCGGAATTGCTGTCTGCAT  
TTCGGACGTACATTTTCTCCACACTGGTTCGGCGTAAAAGTTCCCACGACTGGCTGCA  
ACGACAAGCACGCGATCCCTACGTGAAGAAGGCGCGGATCGTCAGCTATCGTGCTCG  
CAGTGCCTTTAAATTGCTGGAGGTGGATGAACGCTTTAAAATCTTTGCACCGGGCCA  
GGTGGTTCGTCGACCTAGGCGCTTCGCTGTGCTCGCCAATCTCACCCCGGTGATGGA  
GAAGCCGCTGATCCATCCCCTCACGGCCTGGTGTGATCGGGGTTGATCTGCTGGACAT  
TTTGCCCTACCCCGGCGCGGTCTTCCTGCCGCATTCGGACTTCACCAAGGGTAAAAC  
GAAGCGGAAAATCCTCGAGCAGCTGGCGGGACGGCCGGTTCGACGTAGTTCTCTCAG  
ACATGGCGCCTAATGCCAGCGGGATCAGCCAGCTGGACCACGAGGCCATCGTCGGG  
CTCTGCACGGAAGCGTTGCGGTTTGGTGTGACGGTCCTCCGGGAGGGCGGGACGTTT  
TTGTGTAATAATATGGACCGGCTCGGGGGATCAGGCCCTCAGGGCGTTGTTGCGGACG  
CATTTTCGCGGTGGTGCAGGAATGTGAAGCCGCGGCGAGTCGCGATGAATCCTCCGAG  
TTGTATCTGCTGGGGACGGGGTTAAGGGGCTGCCGCAGCAACCGGTGGAAAAAAT  
AAACTCTTGA

>maker-scaffold2180\_size22430-snap-gene-0.18-mRNA-1

ATGTTTTTATCCCTCCTCGAACTGTCCAGCTAATTTGTGCAAAATTTTCGAGCAATTT  
CCATTTGCATGAGCAGCAGCAGCGTCGGCGCGGCAGAATGGTCCAGAAGTGCAGAGA  
TTTGCCTTAATTTACACACTGGAATCCATCTGCCGAGGAATGGAGCGAATGCTGT  
TCTCGCGTCGAGCTGGAAGAGATTGCGAGAATTCAGCGCTTCGTTTACAAGAAAGAT  
CGAAAGCTGCGCTGGCGGGTCGCTCATTTTTCGGCACTTCTTGACGGATGTTTTGC

AAGTAAAGAATTCGTCGCTTGTGTTTGGGCGAGGCGAAAAAGGCAAACCATTCCTTC  
AGAGTCCGCCACAAAGCGAGCATGTTTGGGATTTCAATTTGTCGCACAGCGGAGATT  
TCGTCGTTTTGGGAGCGGAACAAGATGCGTTGATTGGAATTGACATCATGAAAACGG  
ACTTTCCAGAGGGCAAAAACCTGGCGGACTACTTCAAGAATTTCTACCGGCTCTGGT  
GTTTAAAAGAAAGCTATGTCAAGGCGCTCGGGGTGGGAATCGGCTATAACGTCTCGC  
GACTGGACTTCGATCTGCCGGATAAAACGCTTGTGTCGCCGGAAGGCCGCCGTCACA  
TTTCCCTTTCGATTGAAAGCACGATTCAGCCGGATTGGAGCTTCACAGAATTCGTAGT  
GGACGAGCATCATGTGGGGGCAGTGGCTGTTTACGGCTCAGGCGCAACTTACGCAGC  
GTGAAAGGACACCGGAAATGGTTTTCTTACGATGGATGAGATTGTGGCGAAGCTGG  
AACCGCTTGCAGAATCCGATCCGGAGCTTGGGGCTCGGTTTTGCTCTAAACTTGAGA  
GACCATCCTGA

>maker-scaffold1211\_size29553-snap-gene-0.26-mRNA-1

ATGTTTTTATCCCTCCTCGAACTGTCCAGCTAATTTGTGCAAAAATTTTCGAGCAATTT  
CCATTTGCATGAGCAGCAGCAGCGTCGGCGCGGCAGAATGGTCCAGAAGTGCGAGA  
TTTGCCTTAATTTACACACTGGAATCCATCTGCCGAGGAATGGAGCGAATGCTGT  
TCTCGCTCGAGCTGGAAGAGATTGCGAGAATTCAGCGCTTCGTTTACAAGAAAGAT  
GCGAAAGCTGCGCTGGCGGGTCGCCTCATTGTCGGCACTTCTTGACGGATGTTTTGC  
AAGTAAAGAATTCGTCGCTTGTGTTTGGGCGAGGCGAAAAAGGCAAACCATTCCTTC  
AGAGTCCGCCACAAAGCGAGCATGTTTGGGATTTCAATTTGTCGCACAGCGGAGATT  
TCGTCGTTTTGGGAGCGGAACAAGATGCGTTGATTGGAATTGACATCATGAAAACGG  
ACTTTCCAGAGGGCAAAAACCTGGCGGACTACTTCAAGAATTTCTACCGGCTCTGGT  
GTTTAAAAGAAAGCTATGTCAAGGCGCTCGGGGTGGGAATCGGCTATAACGTCTCGC  
GACTGGACTTCGATCTGCCGGATAAAACGCTTGTGTCGCCGGAAGGCCGCCGTCACA  
TTTCCCTTTCGATTGAAAGCACGATTCAGCCGGATTGGAGCTTCACAGAATTCGTAGT  
GGACGAGCATCATGTGGGGGCAGTGGCTGTTTACGGCTCAGGCGCAACTTACGCAGC  
GTGAAAGGACACCGGAAATGGTTTTCTTACGATGGATGAGATTGTGGCGAAGCTGG  
AACCGCTTGCAGAATCCGATCCGGAGCTTGGGGCTCGGTTTTGCTCTAAACTTGAGA  
GACCATCCTGA

>snap\_masked-scaffold8074\_size10437-processed-gene-0.8-mRNA-1

ATGTTTTTATCCCTCCTCGAACTGTCCAGCTAATTTGTGCAAAAATTTTCGAGCAATTT  
CCATTTGCATGAGCAGCAGCAGCGTCGGCGCGGCAGAATGGTCCAGAAGTGCGAGA  
TTTGCCTTAATTTACACACTGGAATCCATCTGCCGAGGAATGGAGCGAATGCTGT  
TCTCGCTCGAGCTGGAAGAGATTGCGAGAATTCAGCGCTTCGTTTACAAGAAAGAT  
GCGAAAGCTGCGCTGGCGGGTCGCCTCATTGTCGGCACTTCTTGACGGATGTTTTGC  
AAGTAAAGAATTCGTCGCTTGTGTTTGGGCGAGGCGAAAAAGGCAAACCATTCCTTC  
AGAGTCCGCCACAAAGCGAGCATGTTTGGGATTTCAATTTGTCGCACAGCGGAGATT  
TCGTCGTTTTGGGAGCGGAACAAGATGCGTTGATTGGAATTGACATCATGAAAACGG  
ACTTTCCAGAGGGCAAAAACCTGGCGGACTACTTCAACTATGTCAAGGCGCTCGGGG  
TGGGAATCGGCTATAACGTCTCGCGACTGGACTTCGATCTGCCGGATAAAACGCTTG  
TGTCGCCGGAAGGCCGCCGTCACATTTCCCTTTCGATTGAAAGCACGATTCAGCCGG  
ATTGGAGCTTCACAGAATTCGTAGTGGACGAGCATCATGTGGGGGCAGTGGCTGTTT  
AGGCTCAGGCGCAACTTACGCAGCGTGAAAGGACACCGGAAATGGTTTTCTTACGA  
TGATGAGATTGTGGCGAAGCTGGAACCGCTTGCAGAATCCGATCCGGAGCTTGGGG  
CTCGATTCTGTTTCTCATGTGA

>maker-scaffold9879\_size9124-snap-gene-0.10-mRNA-1

ATGTTTTTATCCCTCCTCGAACTGTCCAGCTAATTTGTGCAAAAATTTTCGAGCAATTT  
CCATTTGCATGAGCAGCAGCAGCGTCGGCGCGGCAGAATGGTCCAGAAGTGCGAGA  
TTTGCCTTAATTTACACACTGGAATCCATCTGCCGAGGAATGGAGCGAATGCTGT  
TCTCGCTCGAGCTGGAAGAGATTGCGAGAATTCAGCGCTTCGTTTACAAGAAAGAT  
GCGAAAGCTGCGCTGGCGGGTCGCCTCATTGTCGGCACTTCTTGACGGATGTTTTGC  
AAGTAAAGAATTCGTCGCTTGTGTTTGGGCGAGGCGAAAAAGGCAAACCATTCCTTC

AGAGTCCGCCACAAAGCGAGCATGTTTGGGATTTCAATTTGTCGCACAGCGGAGATT  
TCGTCGTTTTGGGAGCGGAACAAGATGCGTTGATTGGAATTGACATCATGAAAACGG  
ACTTTCCAGAGGGCAAAAACCTGGCGGACTACTTCAACTATGTCAAGGCGCTCGGGG  
TGGGAATCGGCTATAACGTCTCGCGACTGGACTTCGATCTGCCGGATAAAAACGCTTG  
TGTCGCCGGAAGGCCGCCGTACATTTCCCTTTTCGATTGAAAGCACGATTCAGCCGG  
ATTGGAGCTTCACAGAATTCGTAGTGGACGAGCATCATGTGGGGGCAGTGGCTGTTT  
AGGCTCAGGCGCAACTTACGCAGCGTGAAAGGACACCGGAAATGGTTTTCTTACGA  
TGGATGAGATTGTGGCGAAGCTGGAACCGCTAGCAGAATCCGATCCGGAGCTTGGG  
GCTCGGTTTTGCTCTAAACTTGAGAGACCATCCTGA

>augustus\_masked-scaffold1193\_size29780-processed-gene-0.4-mRNA-1

ATGTTTTTATCCCTCCTCGAACTGTCCAGCTAATTTGTGCAAAATTTTCGAGCAATTT  
CCATTTGCATGAGCAGCAGCAGCGTCGGCGCGGCAGAATGGTCCAGAAGTGCAGAGA  
TTTGCGCTTAATTTACACACTGGAATCCATCTGCCGAGGAATGGAGCGAATGCTGT  
TCTCGCGTTCGAGCTGGAAGAGATTACGAGAATTCAGCGCTTCGTTTACAAGAAAGAT  
GCGAAAGCTGCGCTGGCGGGTCGCCTCATTGTCGGCACTTCTTGACGGATGTTTTGC  
AAGTAAAGAATTCGTGCTTGTGTTTGGGCGAGGCGAAAAGGCAAACCATTCCTGC  
AGAGTCCGCCACAAAGCGAGCATGTTTGGGATTTCAATTTGTCGCACAGCGGAGATT  
TCGTCGTTTTGGGAGCGGAACAAGATGCGTTGATTGGAATTGACATCATGAAAACGG  
ACTTTCCAGAGGGCAAAAATCTGGCGGACTACTTCAAGTTAATGAGCTCTCAGTTTTT  
ATCCAGAGAATGGAACCTGATTCGCGCCCCTGCAAACGACACGGACAAACTAAGGA  
ATTTCTACCGGCTCTGGTGTGTTGAAAGAAAGCTATGTCAAGGCGCTCGGGGTGGGAA  
TCGGCTATAACGTCTCGCGACTGGACTTCGATCTGCCGGATAAAAACGCTTGTGTGCG  
CGGAAAGCTGCCGTACATTTCCCTTTTCGATTGACAGCACGATTCAGCCGCATTGGA  
GCTTCACAGAATTCGTAGTGGACGAGCATCACGTGGGGGCAGTGGCTGTTACAGGCTC  
AGGCGCAACTTACGCAGCGTGAAAGGACACCGGAAATGGTTTTCTTACGGTGGATG  
AGATTGTGGCGAAGCTGGAACCGCTAGCAGAATCCGATCCGGAGCTTGGGGCTCGGT  
TTTGCTCTAAACTTGAGAGACCATCCTGA

>maker-scaffold20758\_size3549-augustus-gene-0.1-mRNA-1

ATGTTTTTAAAGGGATTTTCGGTTGGATCTGTTTCTAGGTGGTATTTTGGTGCATATC  
GCGGCAGGAAGCGGAGGAGATACTACGAATTTGCTCAGAGGGATGCTATATTGTCA  
GAGCGTGTGAACTTGCCCTGCCGGAGAGATTACTCCCTCGCCATAAAGAGTTCCTGTG  
GATTTATGCATCTGCGGATCCACAGGCAGTCGGACGATCTGTACCGGTTAGCCGACT  
TCAACCGCGTCTTTTTACAGTTCCCCATTTGATAGAGTACTACAGTCTTGAGCAGCT  
CCCGATTCGAGGCGCAGAGTGTACCATCCTGCTGCATCCCGTTCATCAACAGCTGCT  
CTAG

>maker-scaffold3428\_size24352-snap-gene-0.20-mRNA-1

ATGTTTTTGTTCAGTTTGGTGTGTTGATATTGATGCTGGCCTGCGGTGATATCCGAT  
GCATTGAAGAGGGAAGGAAAGCTTCGGGGGACTCGCTAGCAGAATTCGCGCCGTCA  
GAGTTGGAGCGGGAATCGCCATCGGACGGACTGACAATCTCTACGGGGAAGTAA  
GGATGATTTTCATGGGGAGTTCCACAAGCGAGTTCAGCGACCAGCCTCCGGGAGACC  
GGCCTCATCCCGCCTGGCCAAAAGAAACAGCAACGTTACTTACCGTACTCTCCCTC  
CTATGGCAAAGCAGCCATTTCGCGATTCTTCTTGCCGGAGGAGATGGCGGCCGACCT  
CGTTTCGGAGAAGCTAATCTTTCCGACGTCTAGAGATAACCACTGGCGTAAAACGGAA  
GAAGCCGCGGGTGCAGGCAGCGGTGTCTGGACCCGTGTCTGGTGTGACCTTCGGC  
CTCTCCGGTTATCCTGCAATCTTTGCTTACGACATTGCGTTGGCGGAGGATTCTGCT  
AGCCCTGAGAACACTGAAAGCACACCGGATATCTTGTTCATTTCGACATTGCCCTCCCC  
GTCAGACCCACCAAGCCACCCAAATCGACCGAAACCGCTTGCAAAGAGCGATGGG  
ACCAGCCATGCAAGGTGCTCGACAGGATTTTCGTCCAAAAGTCGCCAATCCAAGACC  
TGATCAATGCCTTGTTAATGCGGATAATCGGGAGAGCCAGCCTTGATCTGGACTGT  
CGGGAAGCCCTCCAGAACACTCGTTTTGCCTACCAGAGCGAGTTTTCGGGACGCCG  
TTTGCCGACCAGTTCAGTGGAGCAATGCGGATCATCTGTTTCGTTACCTGGACCA



AGACGACATCGATCAGTCACAAATGGCGGCGGACGATGAAGACTGCTTTGAGGATG  
CTGAGGTGGAATGCGATCCTGATTCCCCTTACCGAACCTTTGATGGCACCTGTAACA  
ACCTCCAGAAACCGCTGCAGGGTTCTGCCAACTCAGCACAAAGCCGATTGGGACCGG  
CCGAGTATGAAGACGGCATCGCCGAGCCGCGCCGCTTGTCTCTTGCCTCACAGATTC  
AAAACCGCCACTGCTGCTGCCCTCAGCTCAGCGGTCCGTGACGCCGTCTTGCTGTG  
GCACGGACGCTGCCTGCATCCACCCTGCCTGTTTCCCATCCTGATCCCCGCGAATGA  
CCCGGTGTACGGGCAGTTCAGTCAGAACTGTCTGGAATTTGTCCGTTCTCAGCCGGC  
CGCCAGAGCGGGTGCCGTCTGGGCAAGCGCATTCCCCTCGATCAAGTCACCGCATA  
CATTGACGGCTCGCAGATTTACGGATCCAAGGTCTCTGATGCCAACCGCTTGCGGGC  
TAAACGCCGGGGCCTTTTGC GGACCAACGATTGCCCCATCTGTCTCCAGACGAATGT  
CGTGATGATTCCTGGCGGACCTGATAGTCAAGGTTGTAAGGCACCGGATGCGAACCG  
GAAATTTCAACTCTGGGTGATAACACCCTGCCCGTGGCGGATGCGAACGGCGTGGA  
GTATCCCCTTACCAGCATTTTGGCAATCCC GCCATGTGGTACAAACCCGGAATCATC  
GACGAACTCCTTCGCAACCTGCCTGGTAAGCCGGCCGAGGCCTTCGACGCGCAGTTT  
GCCTTCGTCTTCCAGAATCAAATTTTCAAGCCGGTGAGCAAGCCGTTGGGGATCGAC  
CTCCTGGCTTTCAACATTCAGCGCGGTGCGGACCACGGTGTTCCTGCGTACATCAAG  
ATGCGGGAGATATGTGGACTGGCTCCGTTTCAAAGCTGAAAAACGGTGACCGCTTC  
TGGTACGAGAACGACGGCGTTTTTCACCCCAAAACAATTGAAGGAGATCAAGAAGGT  
CTCAATGGCGGTGCTCCTGTGTCAA AACTCCCAGACCGAGCAGGTTCAACCGAAGCC  
GTTCTCATCGCGTCAGAGAGCGGCAACCCCATCACGCCCTGCGGAGACATCTTGGC  
CAAGGGGGCGATGAAGCTGGAGCCGTTTCTCTCACTCTCTTTTGTCCGACGCGTCCAC  
CGACACAGCACCGGGTTGAAGCGCATGCAGGTTTCCAGGCAATGGATCGACAAAGG  
AATAACGTGCACAGCAACCCACCTGAGGAAAGATGGGTGA

>snap\_masked-scaffold135\_size73422-processed-gene-0.30-mRNA-1

ATGTTTTTGTGTGTGAGTTCGAAGTTGGATGCCCAGAAGCTCTACACTGAACGAGTT  
AACGTGGAAAGATTTCGATTTTCGCTCGGCACCCGCTTCTCCTGGGCCTGGGGGATTTCG  
CAGTCGAACAAAGCAGCCGACGCGAGCACTAGTCCAATGGTCTTTTGCAGGGTGTGT  
AATTCGAAAATTCCTACTGGAGGGATACGACTTGGATGAGCACTTTATCGTCAAGTGC  
AGTCAGTGTAAAGAAGCCACGCCGATACGACCAGCGCCGCATGGTGAGCGGATCAT  
CACCGTAGTCGGAGAAGGCGGCGCAGGTGACAAAAACGGAAAAGGCATGACAGCG  
ACCCAGCCCCCGCCGGTACTTGCCGTATTACCTGCGCCCATTGTCAGCAACCCTTCA  
TTTTCAACATCAAGAACAATTCCCTAGTAAAGTGTCCCTGCTGCGGCAACATTTCCGC  
CGTTGACGACGAACACCACCGTGATCAGATGCGTAAATCGATAATGCTATCAGTGAC  
GTTCTTCATCCTGACTGTAGTCATAATTTTTGTAAATGCTCTGTGCAACCATCGGTTT  
GCCGGAGACCTTGCCTGTACGTTGTTCTTGTAGCTATCACCGTTCTGATTCGGTGTG  
GTGAGCGTGCCAACCACACCTTCCGGATCCGTCAAGCACCAGAAGCAGCGATAGCG  
AACATGAGTTTAGGTCAGA ACTGA

>snap\_masked-scaffold2178\_size22435-processed-gene-0.2-mRNA-1

ATGTTTTTGGCAGAAAAGATGTTGAATTTGATTGTGTTTCGCTGGATTTTGTCAAACCT  
GTTTCGTCATGGCAAGAAATTGGGAACAATTTTCTGTCTACGATATTGAAATTGTCAC  
CCCAACCTATTGTGGTACCGATTTCGCTGATGTCCTTGAATTATATAGGACCGTCGTAT  
TCAACGGGAATAGAGGTCTTTCGAGCCACCAGTACGCGGCTCAATGTGACCCATCGA  
ACCTTAATGAACACCAACGTAACGACAGATTGCTTGACCTTGTTGAGCAACGTGCAG  
GATGTGCTGGCACGATGGTATTATGCCGAGAAACGGAAGGATTCCGTTCTGTCATC  
ATCACACCAGGCTGCTTGGAGTTAAACTATGTAATCAATTGGCGAGAGGTTGGGAT  
ATACTACTGCTACAACCGTCAGTATTGAATCCACAATCCGGGCATATGCCTCTGCTG  
CATCGACATGGATATCAACGTCTTACTATCCGTCGAATTGTGGAGATTTTTACCGGCA  
GTTTTTGTTCGAAATAACTGGACCACCATCTCCCTTATTCTCGATATCGATACGAAT  
GGACCGCCATTTACACGACCTTAGCCATGACCACAGCTAATGAATTGAAAGAACAA  
AGTTTTAATTTAACTATTTGGACCCGACAGTCGCAGAAGTCCGCTGAAATCACTGCC  
GAAATAGACGCCATGCTCCTCACCGTTCGAACTTTTTGCCGAGTTGTCTACACTTTG

GGACAGCTTCTGCACTACGCCATCTGCTCGAGCGTGCATCCAAACTTGACATGACGA  
ATGAACATTACGTTTTTCATAGCCACCAGACCGTTTTTCACACAGTATGTTTCGGCACATT  
TTCCTGGCAAGAACTCCAGCAAGATGACAAGCCTCTGGTCTTTCTGGAAAGCACCCA  
CAACGCTTTCCAAATGCTAGAGCAAGTGATGTCAGGCCTGACAAAATTTGGGAGACTT  
GAATCCATCCAGCCTCCAGAGTGGCCGCTGGCTTGCAAACACTTTTTTCGGTAGAGC  
TTTCAGTCTGGATCTGGGCAATGTCACGCTGAATTCTCAAGGGGTGCGAAGGAGCAC  
CACAGCGACTGTGATGATCGCGCATGAACGAGGCGACTATGCATACAACTGGAAGA  
CCTTGAGGCCAGGAAATTGGAAAATCCTGGCGAAACAATCCAGAAAATGGTGGCTC  
ATCAAAGACGGCATCCAAATCTCTGCCAATTATCAACTTCCCATGTCAGAGGGCGTG  
CGCACAGTCAATTATGTCGGAAAGAAAAGTGAAAGTGCGCGCGAAAAGAACGAAAT  
TTGGAGTTTGTGACCGCAGACGAAGAGAGTGCCTAACCTTCAACTTCAACACGCG  
GAATCGGCCCGGAAAAGTAGAGCAACGGTTTTTGTGCTTAG

>maker-scaffold7470\_size11005-augustus-gene-0.7-mRNA-1

ATGTTTTTGAGGATTACAACAGCCAGACCTGTTTTGCTCTCACTGCTTCTGTACATTG  
CAACATTATTAACATTTAATTTGTGCATCTGTTTCTTTTTGGCTTTGCCGGTTTTCTA  
TATTTCCCGCGGAGTGAAAAGAATTTATATTGCAATCGTCGAGCGACCAAAAAAATG  
GCGGAATTTTCAAGACTCTCTTGGTTTTTAACGCTGGCTATCTTGCTGGCGGTCTGTC  
AGGCTGATCTTTTACACCCAGACATTGTACATGGCACGGAACAGCTCCCATGTGCC  
TGCCGTCTGCCCAGTGGGAAAGCGCTCGGTGGTGGAGAGCAAGTGCGGCCCGAAC  
AAGCTGGTGTGCTGCGTGACCGGGAACAAGAAGCTCTGCTGCCCGAAGAATCTCGAC  
ATCGACCCGCAGACGGCAATTGCCATAGCCAAGAACGGCTGA

>maker-scaffold6222\_size12450-augustus-gene-0.7-mRNA-1

ATGTTTTTGAGGATTACAACAGCCAGACCTGTTTTGCTCTCACTGCTTCTGTACATTG  
CAACATTATTAACATTTAATTTGTGCATCTGTTTCTTTTTGGCTTTGCCGGTTTTCTA  
TATTTCCCGCGGAGTGAAAAGAATTTATATTGCAATCGTCGAGCGACCAAAAAAATG  
GCGGAATTTTCAAGACTCTCTTGGTTTTTAACGCTGGCTATCTTGCTGGCGGTCTGTC  
AGGCTGATCTTTTACACCCAGACATTGTACATGGCACGGAACAGCTCCCATGTGCC  
TGCCGTCTGCCCAGTGGGAAAGCGCTCGGTGGTGGAGAGCAAGTGCGGCCCGAAC  
AAGCTGGTGTGCTGCGTGACCGGGAACAAGAAGCTCTGCTGCCCGAAGAATCTCGAC  
ATCGACCCGCAGACGGCAATTGCCATAGCCAAGAACGGCTGA

>maker-scaffold3149\_size18826-snap-gene-0.9-mRNA-1

ATGTTTTTGACTAAGCTTTTTTGGATCGCTATTTTTGAGATATTTTGCAGTGTGTC  
AGCCTCACCGGCGTCCGCCGAAGACGGAGCCATGGTGTGATGAATCTGTGCGTGATCCT  
CGAACGGGACCACTACTACTCACCGCAACTACGACAACTGGCGGCTGCGATCGA  
CTTAGCACTGGCCTATGCGAAGGACGAAATCCTCTTGGAGTCGGGAATTGTTCTTAA  
CAAGACTTACCGCGATGGCGGACGGAACCTGCGGGTTAACAATTTGTCTGCAGCCG  
CGCGATGCAGCTGTTTGGCGGCGGACTGATGTGTGATGCTTACCTTGGACCTGGATG  
TGAAACGCGGCTGCTGATATTTCCAACATCGCTGCCTTCAACAACGCTCCTGTTTTT  
GCAACGCCTGCGGGAGGGTTGACTTCTTCGACAGTCCCAGGTCGTTGTTCCCGCAT  
CTCATCCGGATGAGCTACCGCATGTCTCTGGTGGCTTCCGTCATCATTGACTGCCTGA  
AGCATCTCTCCATGGTACATACCTTTAGCATCGTGGATCCAACCGTGCCTTTCACCA  
ACTGGCCAATGAAGCTTTGTTTGCACATTTTCGATTAAACGAACCGGAACTTCTGCG  
GTATTCGTACTTCAGATTTTTTGAAGTTAACGATACCGAAGACATTTATCGGGAACA  
TCTACAAAAGGCTCGCTCAACCGCACGAACGATTCTACTGTTCAACAATGGCAAAC  
GACCCGGCAGCTTTTGTATTGGCTAGGGATGCTGGCATGTGCAATGGCGACTACGT  
CTACATCACGGTCGAACTGTTTGAATCGGAAAGTTGGGGAATTCTCGACTACAGGAG  
TGACGATGGAAGGAACAAGGAAGCCAGAGAGGCGTTCACAAGCTTGCTGGTGTAT  
CGTTGGTGAGCGGTCACACGATGTACTGGGACTCATTCAAGTGCAGCTTTGCCGCCA  
CCGCACGAAGCACATATAACTACAGTGGCACTGGTCCGGAAGACAAAGGGGCATTT  
AGGATGGATCCAATGGTGACAGCCTATTTGACTCCGTGGTCTCTACGCTAACGCT  
CTACGAAGAGTCCAATCAATCGGCCAGTCCCTTCGTAACCTCGTCTCTTGTTTTGGGAG

AGATGAGGGACCGCACTTACACTAGCCATTAACAACGGAAATCATCATGAACAAA  
GACGGCGATCGATTAATTACATATGGGATGTATGAAATACTTTTCAACGGCCAATTT  
GAGGCGGTGACGGAGCTCAATCTTACTACCGGCTCGGTTTATTACATCACCAACATC  
TCTGGAACGGCCATCCTCAGCCGGTTGATGTACCGTTTTGCGGCTATCTTGGAACG  
ACCCCAAATGCACGCATAAAAGCCGTACAGGAGTCATTGTGGGTGTCGTGCTGGCTC  
TACTCGGAATCACCTTTGCTATCATTGCCGCAAATTTATATATGTCGAAAACGCCGGA  
AAGAAAGGGATCCGTATTGGTGGAGAATTTTCGGTGGAAAGAGCTGGATTTCCGGGAT  
GGACCGCCGGGGACCGGGCCTGTATTAGCCCAACCTCAAGAAACCGTAAGGAACAG  
GACGCAGTTCTCTTAGCTCGCATCGTCCCCTCCATTCGGAGTGTATAACAATGGGTAT  
TCCGTACCTCGGTTTTGCAGGGACGAGCTCAGTCGGACAGTGGACTGCAAGCTAGAC  
GGCAGCTCGGCAAGGCCGAGCTCCACGGAGTCCATTTAACAGTCGTGCAGCTACCCA  
GGCAGTTTTGCAAGCCATCGGGAATGCTTTTGAAGGAACTCAACTTAGTCCGGCACA  
TTCACCACGGAAATTTGATCCGGTTTTGTTGGCATTTCCTGGACGAGCAGGACTTTTG  
TCTGTACTTGTGGAAGAAGTCTGCGAGAAGGGCTCGCTGGTGGACCTCATGGCGAA  
CGACGCTGTCAATTTGGATGACACTTTTAAGCAATCTTTCGTCAAGGATGCCATTGAG  
GGTATGGCGTACCTCCACGGAAGCATGCTAGTCTCTCATGGGTTCTTCAGTTCGGCCT  
GCTGCCTTGTGAACAGCAAATTTATGTTAAAAATTGACGACTATGGCATCACGCTGT  
TCCGTGATCCAGTCGACTTTTAAACACCCAAAATATCGGACACTGTTGACAAGGAGT  
ACGGAGTTTACCTGTGGAGAGCTCCCGAGCTCCTGCGGGAGACCATGCCATCAAGG  
GAACCCAGGTGATGTCTACAGTCTCGGCATCGTAA

>maker-scaffold902\_size33611-augustus-gene-0.17-mRNA-1

ATGTTTTTGACGATATACTACAACCTTTTTCTGCCTTAAAAGTCTTAAAATGTCACATC  
ACGCCATTTTATCTGTATTGACTAAACTCTTATTGCTGGCAGTAATAGCATCTGTACA  
TGCAGAAGATGCTGTCCCATTCGGGAATCCGCCTGCAATTCATGGCGAAACGAAATG  
TTTCTCCGCCGGTTCGCTGGAACCGTCAACGACCAAGAGCACCGGACTCGTGCTCTA  
CAGCATGCGCTTCTGTCCGTACTGCCACCGGGTCCGATTGGTGTGGCGGCCAAAAA  
AATCCCATACGAAATCATCAATATTGATGTGACAAAAAAGCCGCAGTGGTTCCTGAA  
CCGGAATCCGCTCGGGAAGATTCCCCTTTACAAGAACCGGATGGCACGCTGATCTA  
CGAGTCCCTTCTCGTGGCGGAATACCTCGATGAGAAGTTCAGCAGCGGAGGGAACT  
TTTACCGGCAAATCTGACCGCGCGTGTTCAGCAAAAAATGCTGCTCGAAGTTGTCAA  
CGAAAAGTTTATCAGGAAGTACAGGCCGGATCGATGCAAAAGCGACGAGAAGAACC  
GCAACGAATCAGTTGAAGGCCTAATGGAAGTGGAGACCATGCTGAGGAGCGATTTT  
TTTTCCGGGGAAAATGTTGGATTTCGTGGACCTGATGGTGTGGCCGTGGCTCTCCGGT  
GTCAGCGTCTGGAAGGAACTGCGGGGTCTGCACATCCCGACCGGAAAGTACCCAAA  
AATTGCGGCATGGATTGTGAGAATGAATGAGTTGCCGTTTCGTCAAGCAAACCACGTA  
CCCCTGGAGCTGAGCAAACGGTTCGCCGTGAAGTACAATTTCCGGTCCGGGAAACATT  
TGATTGTAATTTAGGCCTGTCCACCTAG

>maker-scaffold1302\_size28707-augustus-gene-0.17-mRNA-1

ATGTTTTTGACGATATACTACAACCTTTTTCTGCCTTAAAAGTCTTAAAATGTCACATC  
ACGCCATTTTATCTGTATTGACTAAACTCTTATTGCTGGCAGTAATAGCATCTGTACA  
TGCAGAAGATGCTGTTCCATTCGGGAATCCGCCTGCGATTCATGGCGAAACGAAATG  
TTTCGCCGCCGGTTCGCTGGAACCGTCAACGACCAAGAGCACCGGACTCGTGCTCTA  
CAGCATGCGCTTCTGTCCGTACTGCCACCGGGTCCGATTGGTGTGGCGGCCAAAAA  
AATCCCATACGAAATCATCAATATTGATGTGACAAAAAAGCCGCAGTGGTTCCTGAA  
CCGGAATCCGCTCGGGAAGATTCCCCTTTACAAGAACCGGATGGCACGCTGATCTA  
CGAGTCCCTTCTCGTGGCGGAATACCTCGATGAGAAGTTCAGCAGCGGAGGGAACT  
TTTACCGGCAAATCTGACCGCGCGTGTTCAGCAAAAAATGCTGCTCGAAGTTGTCAA  
CGAAAAGTTTATCAGGAAGTACAGGCCGGATCGATGCAAAAGCGACGAGAAGAACC  
GCAACGAATCAGTTGAAGGCCTAATGGAAGTGGAGACCATACTGAGGAGCGATTTT  
TTTTCCGGGGAAAATTTGGATTTCGTGGACCTGATGGTGTGGCCGTGGCTCTCCGGTG  
TCAGCATCTGGAAGGAACTGCGGGGTCTGCACATCCCGACCGGAAAGTACCCAAA

ATTGCGGCATGGATTGTGAGAATGAATGAGTTGCCGTTTCGTCAAGCAAACCACGTAC  
CCACTGGAGCTGAGCAAACGGTTCGCCAATTTGTTTCCTTGTAGTTTCTCTTATAGCCT  
TTGAATTTGTTCCCTGGATCACATACTTACTCTTCGTTTCTAATATGAGCGGAATATT  
GCCTGTTATTCTTGTGGTTCTGTTCGGTTGCCGCCGTTTCTGTCTGGTCACTCGGCCTCT  
CCAGCTGCGACGGCAGTGCAACCGTTAAAATCAAAGCCTCGACCTCAGCCCGGGC  
GAAATCCACCCCGGGCAGGATCTCCTGATCAACGCTCAATGGGACGTTTCTCGGGGAT  
GTCAGCAAGCCGGTCAAAGCGGAGCTTAAATTCTCCAAGTCCCTTGGATTCTTTCGC  
ATCCAGGGAACCTACGATATGGAAGTTCGGCTGATAGACGGATCAGGCCGCAAACCT  
GGGCTGTTGGTTCGGGAAGGATTACGGTCAAACAATA

>snap\_masked-scaffold1466\_size27085-processed-gene-0.12-mRNA-1

ATGTTTTTCTCGCAGGTGATGACATCATTCTCATTTTTTCACCTACTCTTCACTCAAC  
ATCCCCGCACTCTCTCCCCGTTGCGCATTCTTCGGAAAGACCCTTATCATGTCC  
TCGACCCGTGCCGCACCCTTCACTGGGGTCGCAAGGGGAAGTCGGGGCCGAAAGT  
GGCGACCTCGGCAGCGACCCCGACGGCGACCCCGAAGTCGATGGCTGCGGCTTCCGC  
CATTGTTCCCTCCCGCACCCTACCAAGGCAGCTGTGCCGGTACGATTCGGCCGTGTT  
AATGTTGCTGCTGCATCTGCGAAAGTGGTTCGTGACTCCGCCGCCGCCGCGAGCGTC  
CCGTTGCCGCCGTATGAGAGGAACCCGTGGAAAGCTCCGAAGACTCCTAATTCGACA  
GCGTCTTCTTCGCGGGGATCAGCTTCTTAGAAAATGACGGGACATTCTACCTTCGCC  
CACTGGAGGTCGGAGAAGCCTTGGCTAGTCTTTCGACGAAATGGCAGTCGGATTTTG  
CGGCCTGCGAGAATCTCCACGTCAGTCAATTGAAATATGGCGCTCCGTGTATCGTCA  
AGTATGCGAAGGATGAATGCTGGTATCGCGCCACTTTCCTCGGCATTCGCGACAATA  
AGCGGCACGTCTTTACGAGGACTTTGGCACGGTTGAACCCATCGCTGACGACAAGC  
ACTACAAGGCCATCGGTGATGCCTGTCTGACGCCTACGAGCATCTACATGCCTTTT  
CTCCTGCCGGCTCGTACACCCCATGAACAACCTGGAATTTGCTGACTTGTCTGCGAGC  
GCCAGCGACCTCGACCTAGCCCGGCATCATCGCAGGCACCACTGTTTTGGTGGAC  
GTCATCGGCTATCGGCCTGAACGTCGTATGGCAAAGAGCGTGTCTTCTACTCGTG  
GACATCTTCATCGATGGTGTGACCGACGGATCAGCCTGCTGGATCGGCTGATGGAG  
CGTAACCCGAAGGTGGCCTTCAAACCGGCCTTCCCTCAGGGGGTCAGCTTCGATTTG  
ACCCCGACGGAACGAGAGTGTGCCATTCTGCAGTTCCCGCCGGCTCATGTTCCGCCG  
TTCGGAGAGAAGATTCTTGTCAAGCTCGTCGATATCAAGGATCAGGAAGCTGTATTG  
CTGTTTCGTGCCGATGCCGGAGGCGCGGACTCGAATGTTAGCTCCACCGCTCGGGTC  
ATCTACTCTGACGCGTCCATTTTGGCTTCCCTGGAGGAAGAATGGACCAAGGGAGTT  
GGAGGGGAACCTGAAACCGGCCGCGCTGGTCAATCAAGGCAACTCCTATCTGATTTCG  
CACGAGCGATCAGTCTGCCGGGTGGAGGTGTCGGAAGTGTGGGCGATCTGGACGC  
GGAGTACCAAGCGCGGGACGTGGCCGTTGTCTTGGTGGATCGCGGTTTGCAGATGAA  
CTTGCCGCGCGTGAGCTGTTGACCCTGCCGGCGGTGGTGTTCGGTCTGCGTGGCCAA  
GCAGACATTGTGGGCGGATGTCTGTCTGACCGGAAACTCTCAGGTCCAGCGAGGTGG  
CAGACAGGCACTTGACGAGGACTTTGAACCGCTCGATAGCATGGCAGTGATCATGTC  
GTACGTGGGTGAAGAGGTCTTCGCCGAATTCAGCGCCGGTAAGGGGGAAACCGGGGA  
AACTGACAGTCTGCTTCTTCGTGCAGCAAGCCGCCAGCGCCACCATCGACTGGGCCG  
CTTGA

>maker-scaffold9688\_size9246-snap-gene-0.8-mRNA-1

ATGTTTTTTCGGACACTTGGCCGACCGCGTCGGACGTTTGCCCTGCATCATGGCCTGCT  
ATGTGGGATATTTGCCGTTCCGTATTGCTCTTTCGTACGTGCAGCACTACTGGATCTT  
CTTGGTGTTCGCTTTTTTCGTTCGGCTTCTTACATACAGGTAGCGAATTGCTCACCCGA  
GCATTCACCCCGAGAAACCTAACCTATCCGCCTCTATTTTCAGCTTCTCCCGGAAT  
CTTTGCGCTGGCAAATGGTCCAAGGCAAAGTGGCGGAGGCTAAGAAGACAATCGAA  
TTTATTTTTTCGCTGGAACAACTCGCGGCGGATCCAGTTTGGACGACAAGCTACAG  
GATATGTCGGATGCCCTCGTAGCGGAGCAGCAACTTGAAGCAGATTACACCTGGCTG  
GATTGCTTCAGATTCGGTTCGGAAGAAGCCGTTGCTGGCCTTCTACGGTTCTTGTGGAC  
TTATGTGCATCATTGCCGGCTGGGATGTCCGGCAACATCGACCTGGAGACTCCTCGGA

CTGCAATCATTTTCACCGCTCGTTTCTGCCTCGCAGGCTCTTATGCCGTGGTATTTCGTT  
TACGGCAGTGAGCTCTTTCCGACCGTTTTACGTAACACCGCTTTTGGGATTTGCATCT  
TCTGTCACTTCCGGCGGCGTCATAGCTCCGCAAGTCATATTATTGGGCAAGGTAAT  
CCACGAATCGGTCCCGTTCGTCATTTTTGGATCGTGTGTCTGTTATCGTACATTCTTG  
TGCTCTCTCAACCGGAGACCTTACATAAAAAGATGCCGGACACCATTGATGAAGTGG  
AGGGACCGGAATACGTGA

>maker-scaffold8497\_size10111-snap-gene-0.9-mRNA-1

ATGTTTTTCGCTAGCATGGCCGGATTATCCGGGGAAATCGTTTTTCTATTGCTGACAT  
TCATTTTTATGGAATGTCTTGCAGATCTTAGCACCAGCAGCAACACCACACTATTGCT  
CAATGTGACGAGCTCAACTCGCAAGCCGACGTTAGAAGACCGGCAATTAAGTGCAGG  
ACTCGGCTCCCCGTTGTGGAATCCCCGGATCCGGCGGAAATGATCCTTTCGGATTGC  
AGGCTCAATTCATAAAGACGACCACGCCGCAACCACGACAGCGGCTCCCGCGACT  
GCACCAGCAGCTGGTCCGCGAGTCGGACCGTTCCTTGATAATCTCACGCTGACCGCG  
TTCCCCGGCGCTTCCGGTTCAGGCGTCAACGAACAACGACATCTTCTTACCGGACTC  
GGTCCAATCCTGGAGAATGAGAGCGCCTTAACACCTCTCAACGCGTCAACGTCGAAC  
GCCAACTTTGTGCGCAACGGTAGACGGCACGTGGTGCCTCGAATTCTCAGAAAGCGG  
GAGATTCCTGCTGGAGTTTGCAGCGGGAGCGATTGTAGGCGCTTCGACTGTTCTCACA  
GCTGCCATTGTGTTCTGAATCCTATTGCAGCATCTCAAAGTCCACTCAACAGCTCA  
TCCCAGCCGATGACATCTCCGTTACCGTTGGAAAGCTTTCGTCCGATTCATGCTCTAC  
TTCACCAGAGAAAACGACAAAATGTAACGGCGATTCTTGTGCCTCTGCGTCTGTGCGA  
GGCATTGAACTGCATGGAAAGCTTTCAGTCGTGAAAGTCGTCAAACATTCGGAGTA  
CAATGCCGTGTTAGGTGATAACGACCTCGCTCTGCTCCTGCTGGCGAAACCGATTAA  
TTTCCTCACAAATCATGTGCCTGTGCCCTCTGTCTTCAAATAACGCCCCGGCAATC  
GGCGAAAATTGTTTGGTTCAGCGGATTCGGCGACGAGCTCTTTATAGGAAATCGTTCC  
TCATCAGTACTAAAGTGGACCACACTCAAACCCGACAAGCAAGCGCCACTTCATCC  
GCCTGTGGATTTAACGTAGACGATACGACGGGAAAGATGACCAACCTTGATCAGTTT  
ATCTGTGCGGGAGGCACCAAGGGCGAAAGCAGCTGCCAGGGCGACAGCGGCGGACC  
GCTTGTCTGCTCAATCAAGCTGCATCTTCCATTATTTAGCCGGAATCTCAGCCTTC  
GGTCCCCATGCGGGGTCAATATCGGCGCGATGTACAGTAACATGGCCAAATTCTTG  
CCATGGATCGTGACAAACAGCCGCGGAGACGCTGCCGTTTCTCAATAG

>maker-scaffold8631\_size10007-snap-gene-0.9-mRNA-1

ATGTTTTTCGCTAGCATGGCCGGATTATCCGGGGAAATCCTTTTCTATTGCTGACAT  
TCATTTTTATGGAATGTCTTGCAGATCTTAGCACCAGCAGCAACACCACACTATTGCT  
CAATGTGACGAGCTCAACTCGCAAGCCGACGTTAGAAGACCGGCAATTAAGTGCAGG  
ACTCGGCTCCCCGTTGTGGAATCCCCGGATCCGGCGGAAATGATCCTTTCGGATTGC  
AGGCTCAATTCATAAAGACGACCACGCCGCAACCACGACAGCGGCTCCCGCGACT  
GCACCAGCAGCTGGTCCGCGAGTCGGACCGTTCCTTGATAATCTCACGCTGACCGCG  
TTCCCCGGCGCTTCCGGTTCAGGCGTCAACGAACAACGACATCTTCTTACCGGACTC  
GGTCCAATCCTGGAGAATGAGAGCGCCTTAACACCTCTCAACGCGTCAACGTCGAAC  
GCCAACTTTGTGCGCAACGGTAGACGGCACGTGGTGCCTCGAATTCTCAGAAAGCGC  
GAGATTCCTGCTGGAGTTTGCAGCGGGAGCGATTGTAGGCGCTTCGACTGTTCTCACA  
GCTGCCATTGTGTTCTGAATCCTATTGCAGCATCTCAAAGTCCACTCAACAGCTCA  
TCCCAGCCGATGACATCTCCGTTACCGTTGGAAAGCTTTCGTCCGATTCATGCTCTAC  
TTCACCAGAGAAAACGACAAAATGTAACGGCGATTCTTGTGCCTCTGCGTCTGTGCGA  
GGCATTGAACTGCATGGAAAGCTTTCAGTCGTGAAAGTCGTCAAACATTCGGAGTA  
CAATGCCGTGTTAGGTGATAACGACCTCGCTCTGCTCCTGCTGGCGAAACCGATTAA  
TTTCCTCACAAATCATACGATACGACGGGAAAGATGACCAACCTTGATCAGTTTAT  
TTGTGCGGGAGGCACCAAGGGCGAAAGCAGCTGCCAGGGCGACAGCGGCGGACCGC  
TTGCTGCTTCAATCAAGCTGCATCTTCCATTATTTAGCCGGAATCTCAGCCTTCGG  
TCCCCATGCGGGGTCAATATCGGCGCGATGTACAGTAACATGGCCAAATTCTTGCC  
ATGGATCGTGACAAACAGTCGCGGAGACGCTGCCGTTTCTCAATAG

>maker-scaffold6144\_size12553-augustus-gene-0.14-mRNA-1

ATGTTTTTCGAAGACATCTCTGAATTCGCCGTTGATCTTTGTCTCTTCACATTTTTTCAC  
CATGATCATCATCTGTGAGACGTGTGCGGAGTTTCATGCAGGTCGTCCGGCCGAACGA  
CGTCAGCGGTGGCCACGGCGGCTATCACGTCGTCTGTCATGTGTGCAAAAATGGAGAT  
TCCCGTCTCCGACTTCCCCGGCTCCAAGCTGATATGTTTCGTAATATCCGAAACTGAAG  
GAAGTGTGCGGAAGTGCATTCCGGAGACGGCGATGCGGGACGAGATGAGACTGACGG  
GGAAGATGAGGAATTGAGCAGCGATTTCGAGTGAGGAAAGCGACGATGAAGCCGACG  
CGAAAGCCAAATCAACGCTGCGGACTAAGAATACAGTAGCCGCTGAGAAGAAGGAT  
CCGAAAGGGCGAGATGTCAGACCAAAGAAGGATGATCCGAGGGCTTTGGATAAGGA  
TCTTTCGTTTAAACGAAAAGAATATGTTGAATGACGGAAAAGCTTGCCGCTGCAAAAA  
GGTCCTGAGAGGATACGGAACCAAGCACGGCCATCTGGTTGGGGACGACCAGCAAA  
AGTACACATGCGAGCCGCGCTCGAACAACGCTAAATCCCTCTTCTGCTACCGGATAA  
ACCTCGACCCAACGGTCAACTTTGATTCGGCCCTGCCTTCGACCATTTCCATAACGG  
AAAGCAGTGTGCCTTTCTTGATTCTGCCTTCTCGCTCACAAAAGCTTGATAAGTAT  
CCCATGGCTCAAACGACGCGATTCAACGCGTCTTACAACGCTATCTTGGAGAGCATC  
CCAGTGCCGGGAATTTCTGTTTTGGGTGACCTGAATCTGCTGAAGAAATTTGTCTTTT  
CCGACATTCTCGAGCTGAAAGACTGGCGCTTGAAGGCGGAAAGCCTCGCGGCGGAC  
AGCAAATACTGTGATACGCTGCATTTTCTCCCGATCTTCGGCCGCACAGTTGATACCG  
TGGTGGAGGTCGCCCCGATGAGCTCCGTCTTGACCACATCATGCGGGAATTTTCGAT  
TTCTATTTGAAGATCATGTGCAACGTTTTTCGCGGCGCGCTAGTTGCTCGACCGGGTCA  
GAAACCGGCCGCCCTGCGGGTAGACCAAATTGATCGCGACACCCGGGACATCACCA  
GCGTGGACCGGAAGGACCGAGACTATCCCGCCATCGTTCACTTCACCACCCGTTGCT  
CCAACACTTCCGACCAAAAATTACTTTAAAGCTCAACGAAAACACTGAAAAACATGCACA  
CCGCTATAGAGAACAAGCCGAAGGACCAGGTGACGCCGAGGAGAAGATGCGCTGC  
CGGGAGCAGGAGAAGGTCGTGGAGGACATGCGCAGTCGGCTGAGTGTGAAGCGCGA  
CGTGACCGTTGTGCTGAGCTCGCGGGAATTTATCACACTGGATTGCGCAGTGATGTT  
GCTCAATACTGCTTGTCTATTCCGTGGATCGCACTTCACTACCGCTTCCACATCTCC  
TGGACGTTCTCGAGCAGAAGCTCGGCTACTCCTTTCACGATCGGAATCTCCTGGAATT  
GGCGCTGACCCACCCGTCTACCGCACCAACCTCGGCATAATCCTGACCACATCCG  
CAACTCGCAGACCAACCTCGGCATCCGCAAGGTCGCCCTTGGTCAGGCCGGAACCTGC  
CGTCCCCAAATCCGGCATGAAAACCTCATCCACACCATGGCGCAACTCGGGGCTGA  
GGATGAAATGGCCTCTCCTATCAAAAATTACGAACGCTGGAATTCCTCGGCGATGC  
GGTGTGGAGTTCATCACGTCCATCAGGCTCTTCTGATGTTTCCGCACCTTTCAGGCA  
AGTCGGTGCAGACAGACAGACAGACAGACAGACAGACAGACAGACAGACAGTGGAA  
TCAAGTTTGTGGATGAGTTCATCAGCCGGTCACTGGGAACGCGGCTGTTCTGCGGGG  
ATGAGGCGTTGGAGAAGGCGTGGCGGTATCCGCCAGCTCATATCAGCGAGGTAGGG  
TTACATTACATAACTGCGCGGTAA

>augustus\_masked-scaffold6294\_size12343-processed-gene-0.3-mRNA-1

ATGTTTTTCGAAGACATCTCTGAATTCGCCGTTGATCTTTGTCTCTTCACATTTTTTCAC  
CATGATCATCATCTGTGAGACGTGTGCGGAGTTTCATGCAGGTCGTCCGGCCGAACGA  
CGTCAGCGGTGGCCACGGCGGCTATCACGTCGTCTGTCATGTGTGCAAAAATGGAGAT  
TCCCGTCTCCGACTTCCCCGGCTCCAAGCTGATATGTTTCGTAATATCCGAAACTGAAG  
GAAGTATCGGAAGTGCATTCCGGAGACGGCGATGCGGGACGAGATGAGACTGACGG  
TGGGTAA

>snap\_masked-scaffold4950\_size14474-processed-gene-0.7-mRNA-1

ATGTTTTTCCTTTTCATTCCACAAATAATCGGAGTGATAGCCGGAAAAACAACACTGAC  
CCGAGGAAGTTGTCCGATTCTGGAGGAAACTTCCCGCGCCTAAATCGTCAGTCATC  
TTCCCAAGGACGCACAGTCCCCAGTTGCCACGTTTAAAATACGAAGAGAATTTGAG  
AAGAAGCCCTCTTCCCGTGAGGATCATGATGCTGGGCGGCGGAAAAAAGGCGTTAA  
AGCCAAACACGACGAAGCTACGAGTGACATCGTCAAGCTTCACTACAACGAATCCCT  
GGAAGCGTATCGCCGTTCCAGACAATTACAGCCAGCTCTCCAGGAGTACGTGACTG

CGTCAACAGAACCGCTCAGTTGTATGAGCATAACGGGCGTATCACTAGCCGAGCGAC  
TATGAAGGTGGTTCGGACAAGAGATCACTCTGAAATGTCGCGATTGTAATCTGCCAGG  
TAAAGCAGCGGACAAATTGGACCCGAAGAAAAGTCGAATGGCGCATGATTCCGTACA  
ACGAGCCGCGGACATCCAGATCATCTACGACACGGAAAAGTTCATCTTCAACGCGG  
AGACCTTTGACTTGACCGTGACGGATTTGACGGTTTACGATTCAGGGCGTTTCCGCTG  
TGCAGTCAGTCAGGAGACGGTGCATATACGACCTGCAGGTCGTTGAGTCGGACAG  
GACCACAACGACATTCGAAAATTCAGCCGACGGGCCGATCTCTCTACCGCCTCTTAT  
TTTACCGGAAGACAATCTCCAGTTCCTTACGCGATGGGATGATTGGGCTCCGTGTAA  
TGAGTGTGGAGTGAAGTCAACCCGCCGGCGAGTGGGAATCTGCACGGTGACGAAAG  
GAATTTTTGAAAACCCGATCAAGCCAGTGGACTACCCACGCTCAACATGTACGGCT  
GGGGTCTTCCCTGTCGGTCAGTCTGATTCCCCGGAAGTTCTCCATGCAGTACACCGA  
TCAGCTGAGTCGACCAAGCGAAGTTCAAATTGGTCACTGCGAACATCCTTGCCCCAC  
TCCACCTCCGGTAGTCTTCGTCACTGACGAGAACGGAAAAGATTGTGCGACCAGTACGA  
GAGGTCGGAAAAGGGCGTCTACTCGTTGGATAAAGGTCCGCCGAAACTGCCGCCGTT  
AGTGCAGCGAGTTACGGCGTACGAGGCGGAAGGCGGCCGAATTCGAATGATTTGTC  
CAAAGTTCTGGAAAGTCGGTACGATGGCAGAACTGCTCAACCACGGATAA

>maker-scaffold16656\_size5236-augustus-gene-0.5-mRNA-1

ATGTTTTTTCCTTTTCATTCCACAAATAATCGGAGTGATAGCCGAAAAACAACCTGAC  
CCGAGGAAGTTGTCCGATTCTGGAGGAACTTCCCGCGCCTAAATCGTCAGTCATC  
TTCCCAAGGACGCACAGTCCCAGTTGCCACGTTTAAAATACGAAGAGAATTTGAG  
AAAAAGCCCTTTCCTGAGGATCATGATGCTGGGCGGCGGAAAAAAGGCGTTAA  
AGCCAAACACGACGAAGCTACGAGTGACATCGTCAAGCTTCACTACAACGAATCCCT  
GGAAGCGTATCGCCGTTCCAGACAATTACAGCCAGCTCTCCAGGAGTACGTCGACTG  
CGTCAACAGAACCGCTCAGTTGTATGAGCATAACGGGCGTATCACTAGCCGAGCGAC  
TATGAAGGTGGTTCGGACAAGAGATCACTCTGAAATGTCGCGATTGTAATCTGCCAGG  
TAAAGCAACGGACAAATTGGACCCGAAGAAAATCGAATGGCGCATGATTCCGTACA  
ACGAACCGCGTGACATCCAGATCATCTACGACACGGAAAAGTTCATCTTCAACGCGG  
AGACCTTTGACTTGACCGTGACGGATTTGACGGTTTACGATTCAGGGCGTTTCCGCTG  
TGCAGTCAGTCAGGAGACGGTGCATATACGACCTGCAGGTCGTTGAGTCGGACAG  
GACCACAACGAAAGGAATTTTTGAAAACCCGATCAAGCCAGTGGACTACCCACGCT  
CAACATGTACGGCTGGGGTCTTCCCTGTCGGTCAGTCTGATTCCCCGGAAGTTCTCC  
ATGCAGTACGCCGATCAGCTGAGTCGACCAAGCGAAGTTCAAATTGGCCACTGCGAA  
CATCCTTGCCCCACTCCACCTCCGGTAGTCTTCGTCACTGACGAGAACGGAAAGATT  
GTCGACCAGTACGAGAGGTCGAAAAGGGCGTCTACTCGTTGGATAAAGGTCCGCC  
GAAATTGCCGCCGTTAGTGCAGCGAGTTACGGCGTACGAGGCGGAAGGCGGCCGAA  
TTCGAATGATTTGCCCAAAGTAA

>maker-scaffold5317\_size13851-augustus-gene-0.13-mRNA-1

ATGTTTTTTCCTTTTAGTGTGCGACAACACTGGTGACCTTGGCCTGTATGGCGACCGCCG  
CTGTGGTGCCTCAGCCGTCCGGGTTCCGGGATGATGCAGTACAGCGGACGGAGCGGTG  
CGTTCACTTCCCATCCCGGCTATCTCAGCTACTACTACGCCAGCGGATTGAAGAACC  
GCTACGTCGTTACGGTTCGACGGGATCGTTTCGCGCAGATGACCGTCGATCCGACCA  
ACCGCAACTACTTCGCCATACGACCCTACGACTTTGTGGTGATCCAAAGCAATGTGA  
TCGTCGCCGACTTCTGCGTCAACTCTTACAGCAGCGGTGCCGTCGATCCGGCCATGTT  
AGGCTGGCAGGCTTTTTGGGCTAGCTTGGCCAGCAGTCCGACAAATCCTCAGCCCGC  
GCAAACAACCGCACCAGTCACAACGATTCTGTACACAGGCACCTGCCTCGGCCAA  
GACATGCGGCAAACCGTCACCGAAGCCATCGGACATTCCGAACAAACTGAAAATCG  
TTAATGGTGTGCAGGTTCTGATGGAGCACAACCGTGGGCGTGCGCTTTGGTTTACA  
CCAACGGAAAAGCACAGTTTTGCGACTGTACTGTGATCTACATGGGCGTGACGAACC  
TGAACAAAGCAGTGGCACCAGCAAAACATCTTCAGCATCAGCCGGGTCATCTTGCATC  
CGAATACGATCCCGACACAACCGATTCGATGTTGCCATGATAAAACTAGCCACGC  
CCATCCCCGCGTTTTCTTCCACCCTGATGCCGGCCTGCCTGCCCACTGCTCCGATCAC

TGCCACGGCCGTGAAGACCGGCGCCTTCGGTCGACGCATTTGCTACGTCACCGGGTG  
GGGAACCCTCGCTGCTGGTGAACGTGGCAACGCGAATATCGGATCCGGCTCGGATTT  
ACTCCTCCAAGCTGCCATTGAGATGTTCAATACCACTGCCTGCAAAACCTACCTTTCT  
CCTTATACCTTCTCCAACAACATGCTCTGCGGAGGTTACGATGCCGGCCAGTTCGATT  
CCTGCCAGGGTGACTCCGGCGGCCCGTTGGTCTGTGATGCCGGTGACGGCACTTGGA  
CGCTCAACGGTATCGTCTCGTGGGGCCTCGGATGCGCCGAGGCGAAGAAGCCCGGA  
GTGTACTCCAACCTTTCGCTGCTTTCACTTTTTTCGCCGCAGAAAGTGCCCGTGCGTTGA  
GGCGCCAACTGAATGGGTCAAAGAAAAACCAAGTCTACACGGAACGGATCCGCCGC  
ACGCGTCTGCTAGCGGTGGTGGTCACTTTCTGCATTTCTGTGGACCAGTGCCACGACG  
GTCGACTTCAAGAATTTGTGCGACTACCCAATCGACTTGGTCAAGACGGTCTATGGC  
CGGCAGCCTGTCACGGAGTGTGAGCTCAACGCGAGTGGAGGAAGCTGCAGTAAATC  
CTACAACGGCGGGGCAATGAATTTCAAGAATAGAAGAGACGATCAGAATGTCACGC  
TTGCGGAATTCATCATTAACTTCCGGGAAAGGGATGCCGTGACGCTTATGCCATCA  
ACGTCATGAGCGGTTACAATGTCCCCTGCAGATTGCCACCAGCACTGGCGGACCTT  
CCGTGAAATGCACGGATGCAGAATGCAGAGACGGCATGCATTTGATAAACGACAAC  
TCCAAAGTTCATGAGACCAAACGGGCGGCACGTTTACATTGACCTTCTGCCCCAAA  
GACGAGGCTCTGGCCAGTCGTCTTAGATTTGCCAAGCACTCGATACGTA AAAATCCTG  
ACAGCAGGGAGGAATTATCAGTCGACATTACCAGCTCGGAAGACCGTGTGGAAGGG  
CATTCTTACCGATTCCGCCTGACTCTTGATTTGACTTGGAAACAGTACCGGTCAGA  
CAGGCACTCGCTACGACCGAGACATGTGGCATAACCGTACCGTTGAAGCCGTCAGAC  
ATTCCGAACAAACTCAAATCGTGAATGGTGCAGTGGTTCCTGATGGGACGCAACCG  
TGGGCGTGCGCCATGGTATGGGGTGACTGGAAACCAAACAGTTTTGCGACTGCACT  
GTGATTGATGAACAATGGGTCGTACAGCCAGTCATTGCGTTTTTGTGATGTCAGTGAG  
GCAACTATGAAAACCTATGTCAAGATCTACATGGGCATCACGGATCTCAGACGGGCA  
GTGGCGCCGCAAAATATCTTCGGCATCAGTCGTGTGCATCCGGCATCCTCAATACAGT  
CCCCGCACCTTCGACTTTGACGTCGCTTTGATCAAACCTGCCAGACCCATTCCCGCGT  
TTTCTCCACCCTCATGCCGGCCTGTTTGCCGACTGCTCCGATCAACGCGACGGCAGT  
TGAGACCGGCGCCTATGGTTCGACGAATTTGCTACATCACGGGATGGGGAACACTCGG  
TGCTGGTGAACGTGGTAACGCGACGATTGGATCCGGTTCGGATGTA CTCTTCAAGC  
TGCCATCGAGATGTTCAATACTGCCTGCAGAAATGACCTGCCTCCTAACTCCTTC  
ACGAGTAACATGGTCTGCGGAGGCTATGATGCTGGGGGTTATGATTCCTGCCAGGGA  
GATTCAGGTGGCCCGTTGGTCTGTGATGCCGGTGACGGCACTTGGACGCTCAACGGT  
ATCGTGTGATGGGGCGAAGGATGCGCCTACGCGAATAAGCCCGGAGTGTACTCCAAC  
GTCTACGAACCTGCTTCCCTTATCACATCAACTATGGCGCAAAACTGA

>maker-scaffold12678\_size7469-augustus-gene-0.6-mRNA-1

ATGTTTTTCTTTTTAGTGTCAACACTGGTGACCTTGGCCTGTATGGCGACCGCCGCTG  
TGGTGCCTCAGCCGTCCGGCTTCGGGATGATGCAGTACAGCGGACGGAGCGGTGCGT  
TCACTTCCCATCCCGGCTATCTCAGCTACTATTACGCCAGCGGACTGAAGAACCGCT  
ACGTCGTTACGGTTCGACGGGATCGTTCGCGCAGATGACCGTCGATCCGACCAACC  
GCAACTACTTCGCCATACGACCCTACGACTTTGTGGTGTGATGTTGACGGCAATCTGG  
CAGGGAAGCTCGCCACTGACACCATTCTGACATTCACCAGCCAAAGCAATGTGATCG  
TCGCCGACTTCTGCGTCAACTCTTACAGCAGCGGTGCCGTGATCCGGCCATGTTAG  
GCTGGCAGGCTTTTTGGGCTAGCTTGGCCAGCAGTCCGACAAATCCTCAGCCCGCGC  
AAACAACCGCACCAAGTCACAACGATTCTGTGCACACAGGCACCTGCCTCGGCCAAGA  
CATGCGGCAAACCGTCACCGAAGCCATCGGACATTCCGAACAAACTGAAAATCGTTA  
ATGGTGTGCAGGTTCTGATGGAGCACAGCCGTGGGCGTGCGCTTTGGTTCAGACCA  
ACGGAAAAGCACAGTTTTGCGACTGTACTGTGATCGATAAACAATGGGTTGTCACCG  
CGGGTCATTGCGTTGCGGAAAGTAATGAAGCGACGATGAAGGCGAATGATAAGATC  
TACATGGGCGTGACGAACCTGAACAAAGCAGTGGCACCGCAAAACATCTTCAGCAT  
CAGCCGAGTCATCTGCATCCGCAATACGATCCCGACACAACCGATTTGATGTTGC  
CATGATAAAACTAGCCACGCCCATCCCCGCTTTTCTTCCACCCTCATGCCGGCCTGC



CTGCCCCTGCTCCGATCACTGCCACGGCCGTGAAGACCGGGCGCCTTCGGTTCGACGC  
ATTTGCTACGTCACCGGATGGGGAACCCTCGCTGCTGGTGAACGTGGCAACGCAAAT  
ATCGGATCCGGTTCGGATTGCTCCTCCAAGCTGCCATTGAGATGTTCAATACCACTG  
CCTGCAAAACCTACCTTTCTCCTTATACTTCTCCAACAACATGCTCTGCGGAGGTTA  
CGATGCCGGCCAGTTCGATTCTGCCAGGGTGAATCCGGCGGCCCGTTGGTCTGTGA  
TGCCGGTGAACGCACTTGGACGCTGAACGGTATCGTCTCGTGGGGCCTCGGATGCGC  
CGAGGCGAAGAAGCCCGGAGTGTACTCCAACCTTCGCTGCTTTCACTTTTTCGCCGCA  
GAAAGTGCCCGTGCCTTGAGGCGCCAAATGAATGGGTCAAAGAAAAACCAAGTCTA  
CACGGAACGGATCAGCCGCACGCTGCTGGCGGTGGTGGTCACTTTCTGCATTTT  
GTGGACCAGTGCCACGACGGTCCGACTTCAAGAATTTGTGCGACTACCCAATCGACTT  
GGTCAAACGGTCTATGGCCGGCAGCCTGTCACGGAGTGTGAGCTGAACGCGAGTG  
GAGGAAGCTGCAGTAAATCCTACTACGGCGGGGCAATGAATTTCAAGAATAGAAGA  
GACGATCAGAATGTCACGCTTGCCTTATCATTAATTTCCGGGAAAGGGATGCC  
GTCGACGCTTATGCCATCAACGTCATGAGCGGTTACAATGTCCCACTGCAGATTGCC  
ACCAGCACTGGCGGACCTTCCGTGAAATGCACGGATGCAGAATGCAGAGACGGCAT  
GCATTTGATAAACGACAACCTCAAAGTTCATGAGACCAAACGGGCGGCACGTTTAC  
ATTGACCTTCTGCCCAAAGACGAGGCTCTGGCCAGTTCGCTTTAGATTTGCCAAGCA  
ATCGATACGTAATACTCTGACAGCAGGGAGGAATTATCAGTCGAAATTACCAGCTCG  
GAAGACTGTGTGGAAGGGCATTCTTACCGATTCCGCTGACTCTTGATTTGACTTG  
GAAACAGTACCGGTGACACAGGCACTCGCTACGACCGAGACATGTGGCATAACCGTC  
ACCGTTGAAGCCGTCAGACATTCCGAACAACTCAAATCGTGAATGGTGCAGTGGT  
TCTGATGGGACGCAACCGTGGGCGTGCGCCATGGTATGGGGTGACTGGAAACCAA  
AACAGTTTTGCGACTGCACTGTGATTGATGAACAATGGGTGCTCACAGCCAGTCATT  
GCGTTTTTGATGACAGTGAGGCAACTATGAAAACCTATGTCAAGATCTACATGGGCA  
TCACGGATCTCAGACGGGCACTGGCGCCGCAAATATCTTCGGCATCAGTCGTGTCA  
TCCGGCACCCCTCAATACAGTCCCCGCACCTTCGACTTTGACGTCGCTTTGATCAAAT  
TGCCAGACCCGTTCCCGCGTTTTCTCCACCCTCATGCCGGCCTGTTTGGCGACTGCT  
CCGATCAACGCGACGGCAGTTGAGACCGGCGCCTATGGTCGACGAATTTGCTACATC  
ACGGGATGGGGAACACTCGGTGCTGGTGAACGTGGTAACGCGACGATTGGATCCGG  
TTCGGATGTACTCCTTCAAGCTGCCATCGAGATGTTCAATTCGACTGCTTGCAGAAAT  
GACCTGCCTCCTAACTCCTTACGAGTAACATGGTCTGCGGAGGCTATGATGCTGGG  
GGTTATGATTCTGCCAGGGAGATTCAGGTGGCCCGTTGGTCTGTGATGCCGGTGAC  
GGCACTTGGACGCTCAACGGTATCGTGTATGGGGCGAAGGATGCGCCTACGCGAAT  
AAGCCCGGAGTGTACTCCAACGTCTACGAACTGCTTCCCTTTATCACATCAACTATGG  
CGAAAACCTGA

>maker-scaffold7048\_size11464-snap-gene-0.8-mRNA-1

ATGTTTTTCTCAATGTGGTGAATTTATTTCTGATTGGATTTCTGGTGAACGCGGTTGGT  
GAAGATCTTCTGAAATATCGCAGGATCGCTTCGCACATCGACAATATCGCCGGGCC  
ACCGCGTTTGTGGCTGCCGGTGGGGAATGCCCTACAACCTCAGCGGCAACCATTTCAA  
GTTCTTCCAGCAAATTCGTCAACTAGCAAAGGATTATCGTGAACAGAGCCCCACAGG  
AGCACTCCGATTATGGATTGGCCATACCCTTACGTGATTATGGTTAAGGGAAAGGC  
GGCGGAAGCGGTGCTCAGTAGCTACAAATTCTTGAGAAAGGGTCTGACTATGACTT  
GGTTCATCCTTGGCTTGGGACTGGATTACTTACCAGTACCGGCGACAAATGGCGCTC  
ACGGCGAAAATTTCTGACTCCCGCCTTCCACTTCAAATTTCTCAACGAATTCATCGAC  
GTCTTCCACGAGCAGAGTAAAGTGTGATTGATTGCCTGACAGACAAGGCGGACTCG  
GGGAGGCCTTCGACATTTCCGCTTTCATCAGCCGTTGCACCCTGGACATCATTGTG  
AAACTGCGATGGGGAATAAATTCACGCCAAACTCGCTCTGACTCCACTTACGTGCG  
CCGCGTCTACCGAGCTTCTGCACTAGTTTATCATCGAGTGATCAACCCATTTTACG  
CCCGGATAGCATGTATAGTATCTTCGGTCCAGGGACTGGACGAGTACCCTCAAGAC  
CCTCCACAGCTTACGGACTCGGTATCCTGGAGCGGCAGTCTGATATGCACGAGCA  
GAGACCGTGCAGACCGACACAGACCGTCCGAATGGGAAACGGAAGGCCTTCTCG

ATTTGTTGTTGAGTGCAAAGACGGAGGACGGAAAAGTGCTGGATAACGCCAGCATA  
CGTGAGGAAGTGGATACGTTTCATGTTTGAAGGTCACGACACGACGTCAGTTGCGGCG  
GCTTTCGCAGTCTTCCCTTCTGGGGAATCATCAGGACGTACAGCAGAAGGCATACGAA  
GAGCTGCGTCAGATTTTTGGCGATAACTCAGATATTATTATAACCGGAAGGCAGCATA  
GTCAGCGTCTTCATTTTCGCCCTGGGCCGTGATCCCGACATGTTTCCCAGCCAGATC  
GATTCGACCCGGAGCGGTTTTTCAGACACCAAATCAGCCCGTCACGGACCGTTGACT  
ACGTGCCCTTCTCGGCTGGCCCACGAAACTGCATCGGTCAGAAATTCGCGGTGATGG  
AGGAGAAGACCATCCTCAGTACAATCCTCCGCAGTTACACCATCCAGAATTCAGCT  
GCACAGAAAAACCAGCAGATTTAGCATCAGTCAAGATGTCACGAACAAACTCAGAT  
AACATACAGTCAACGAAATCCAACGGGACAACAACAGCTTTCCCCAGTAGGCCGTTT  
GACTGCGGAAGCATATGA

>maker-scaffold1792\_size24644-snap-gene-0.20-mRNA-1

ATGTTTTTCCGGAATATTTTTCGACGGCGCGAAAGGATGCCGGAATTGCTGTCTGCA  
TTTCGGACGTACATTTACTCCACACTGGTTCGGCGTAAAAGTTCCCACGACTGGCTGC  
AACGACAAGCACGCGATCCCTACGTGAAGAAGGCGCGAATCGTCAGCTATCGTGCTC  
GCAGTGCGTTTAAATTGCTGGAGGTGGATGAACGCTTTAAAATCTTTGCACCTGGCC  
AGGTGGTCGTCGACCTGGGCGCTTCGCCTGTGCTCGCCAATCTCACCCCGGTGATGG  
AGAAGCCGCTGATCCATCCCCTCACGGCCTGGTGATCGGGGTTGATCTGCTGGACA  
TTTTGCCCTACCCCGGCGCGGTCTTCTGCCGCATTTCGGACTTCACCAAGGGTAAAAC  
GAAGCGGAAAATCCTCGAGCAGCTGGCGGGACGGCCGGTCGACGTAGTTCTCTCAG  
ACATGGCGCCTAATGCCAGCGGGATCAGCCAGCTGGACCACGAGGCCATCGTCGGG  
CTCTGCACGGAAGCGTTGCGGTTTGGTGTGACTGTCCTCCGGGAGGGCGGGACGTTT  
TTGTGTAATAATATGGACCGGCTCGGGGGATCAGGCCCTCAGGGCGTTGTTGCGGACG  
CATTTGCGGGTGGTGCGGAATGTGAAGCCGCCGGCGAGTCGCGATGAATCCTCCGAG  
TTGTATCTGCTGGGGACGGGGTTAAGGGGCTGCCGCAGCAACCGGTGAAAAAAT  
AAACTCTGA

>maker-scaffold636\_size38796-snap-gene-0.25-mRNA-1

ATGTTTTTATTTCCCGCCGAACGATTCTATAGTTTCGTCTGTCTAGCTCCTTTTCCCAC  
CTTTGTAATAATTTCCGCAATGATGGATCTCTGGACCATGACGATCACTGCTGCCTGC  
ATTGTAATGGGCTTCTTAATTTGGCAGCAAAGAAGCCTATGGGTTGGGCGTAAATTA  
CCCCAGGCCCATATGGCTGGTGATGGGTGAAGGCGATCGCTACAGGGAACACCG  
CCGCTTCGCCCTGACAGCTCTCCGTGACGTCGGGATGGGAAAGTCCTGGCTGGAACA  
ATCGGTGCTTTCGGAAGTCAGCGACCTCATCGCCCTCATCGACCGGTCCGGAGTGAA  
ACCCCTCAACCTCCGTCCCCATATGACCCAAAGCGTGTCCAACATGATCTGCGCTCTC  
GTGTTTCGGCAAACGGTTCAGTTTGGGTGACGCAACCTTCAACAAGCTCTGCAACAAC  
GTCGGTATCAACTTGCAACTCATGTCGGAGGTTTCAGCCGTTAGGGCCCTGCCGTTT  
CTCAAGTACGTTCCCTTTGGCAAGCTGGCACAATAATGGAGGACCTCAAAGCGAAC  
ATCCAGTCCAATAGGACGTTCAATTGAGTCCCTCATTGATGACCACAAGCAAGGCCAT  
GCAACTGGCCACAATGGTGGCACATCAAACATGGACTATATTCATCGCTTCTTGGAC  
GAAAGGGCGGCTCAACTGGCGGAGAAAGGAGAGACAACGTTTGACGACGAACAGCT  
TACTACTCGGTCGTTGGATTATTCGGCGGCGGTACGGAAACAACAACGACTACCGT  
TTTATGGGCGTTGATTTATATGGTCTTACATCCCAATATTAATAAGCGGGTCCAGGAC  
GAGATCGACGCAGTCGTTACTGCGAATCAGCAACGATTGGCTTCAGCGTTCCCGCTC  
AATGGCGCCCACGAACCAACTTTGAGGACATGGAAATCGGAGGGTTTCACGTTCCC  
GCGCGAAGCATTATCGTGGTCAACACGTACGCCATCCATCGCGATCCAAAGTATTGG  
CCGATCCTCTGCAATTCAACCCGGAACGATTTCTTGATCCGGTCACGGGGAACGTT  
AAGAATCCCCCGGATTCCTGCCTTTTGGCATAGGAAAGCGCTCATGCATCGGAGAG  
CCTTTAGCCAAAATGGAATCTACATATTCTTTGCCAATATAATGAAAGACTTCGACT  
TTCAACCCGTGGGCGCGTTTAAACGTCGATCCTGAGAACTTTAGCAAAGCCTCCACCG  
TGATCCGAGCACCTTTGAATTTTGGAGCTACAATTTGCACGACGAACGGTAGTGGCTT  
AA

>maker-scaffold4005\_size22305-augustus-gene-0.16-mRNA-1

ATGTTTTTAGGTCGCAGCGGAGTGCACGTCCATTTCGAGACGTGGGTCATTCCAGCTG  
TGGCAGTTCTTAGTGGCTCTGTTGGACGACTCCAAAAACGGATCCTTCATCACGTGG  
ACCGGACGAGGAATGGAGTTCAAACCTGATCGACCCGGAAGAGGTTGCACGTCTGTG  
GGGTGTGCAGAAAAATCGGCCGGCCATGAACTACGACAAGCTCAGCCGCTCCCTCCG  
CTACTATTACGAAAAGGGGATCATGCAGAAGGTGTCCGGTGAACGGTACGTCTACAA  
GTTTCATCTGTGATCGGCAAGCCCTCACCGCCCTGTCCGCGGTGGACAAGAACAGCCA  
TCGCAACGGACCCGGGCACTCGCATAAAGTACTCCTCAAAGCATCGCAGGATGATACG  
ACAATAG

>maker-scaffold1823\_size24487-augustus-gene-0.21-mRNA-1

ATGTTTTTAGGTCGCAGCGGAGTGCACGTCCATTTCGAGACGTGGGTCATTCCAGCTG  
TGGCAGTTCTTAGTGGCTCTGTTGGACGACTCCAAAAACGGATCCTTCATCACGTGG  
ACCGGACGAGGAATGGAATTCAAACCTGATCGACCCGGAAGAGGTTGCACGTCTGTG  
GGGTGTGCAGAAAAATCGGCCGGCCATGAACTACGACAAGCTCAGCCGCTCCCTCCG  
CTACTATTACGAAAAGGGGATCATGCAGAAGGTGTCCGGTGAACGATACGTCTACAA  
GTTTCATCTGTGATCGGCAAGCCCTCACCGCCCTGTCCGCGGTGGACAAGAACAGCCA  
TCGCAACGGAACCGGGCACTCGCATAAATACTCCTCAAAGCATCGCAGGATGATACG  
ACAATAG

>maker-scaffold6981\_size11528-augustus-gene-0.6-mRNA-1

ATGTTTTTAGGATGCAAATGGGGTGGATATTCAGCTGGGTGTGACTTACAGCGGGCT  
TGTCGTCTTTCAGAACGCTCTTCGACTGAGCGTCTTCCCTATGAAGGAGTACGATATTC  
TCTGGGGATTTTACATGCTGAACGTTTCGCACTTGCAAGGCTCTCTGGAAATCCTGTGT  
GGAGCACCACAGCTTCTTCCGGATGAACTCCACTCGACCGCTCGTCCCGAAAAAGTT  
CAGCTTATTCTCCTTAGGCTCAAGATTGAGTGCCATCCTTTCCGTTTCTGGAGGTGTT  
GTCGAACTGAAGCGGTGCTGTTTGTGTTGGTCGTGGACCCTCGCTGCGGGAGTTTTTG  
ATATGGCGGTTGTGTCCGGCTTCGACGACTATCCGGATGAGCATATCTTCCGCTGCGT  
CCTGGTGGTTGATCGACCTTTTAAAATACCCAGAATCGGACGGACAGAGTATAAAAC  
GCTCGAGGACGGCGCTCGGAGGTTTCGCGTGGACAAGTCTTCGAATAATATCATCAG  
ATCTCCCTCCAAGCGTCATCGTCGCACGATCGGCCGGCACCCGCGTCGTCACGCGATCA  
CACCTTGGAGGAGAAGCCGACGAAAAATCAGCCACATCAAACCTCATCAATCAAGCC  
ATTCCGTCATCAACCGATCGCACTCCAGCACGGGAATCAATCAATCAACCAGCCGAATCAGGCCA  
ATCAGGACACTTCTCCCAAGCACGGGAATCAATCAATCAACCAGCCGAATCAGGCCACTTCTCCGA  
AGCATTTTGCTGGCGCGCCGATCCTCCACAACCGGACCAGCAACAATTTACCAGCA  
ATAACAACAACAACGTCACTATCCTTCACGTGGGTACGCCCTCACCACCGGGAGCC  
CCGTGCAGAATGGAAGTAACACAAACGGGGGAGGAATTATTGTCGGGAAGCTCCAG  
AATGGCGACGCCAATTTGAATCACCATTACATCGCAATGGCGGTGTGGTGGCCGCG  
ACGGTCCCGTTGACTGCCAAGTTGTTTAATCATTCCAGCAGCCGAAGGGCCAGTCCA  
GCGCGGGATAACGGAAGGGCGACGAGTAA

>maker-scaffold1101\_size30794-snap-gene-0.15-mRNA-1

ATGTTTTTACGGACTTTACAAATTCATATCTCCATTTTCGCTGAAATCTATTCTTCGGG  
CGAAAGTCAATGTCATTTACGGAGAGCGGCGTCGAGGGCCCAAATTGACCGGTGTCC  
AAGGGGAAGATTTCCAGTCAGCGGCCAAAACCTTCCGAAACTTTTTTCCAGCGGTGC  
GAAGCCCTCCGCGGAATATTTCTCCGGTACGCCATACCTTTAAATATGGCAAGTGA  
TAATGAGACCAGCGTGCGGGTCGACGAAGGGGCAGTGGCGGAGGAAGAGGCTAATT  
ATCGGAAGGCGGTGGAGAACTTGATGAGAGGAAGTGACCTGCTGAAGTTACATCCG  
CTTCGAACACTTAAGCGAAGTTTCTCTCTCGAAGCGGATCATGAGAATATCGTTTATC  
GGGCACCTTTCGGGATCGGGCTCTGGACGGGACTAACCAAGACAACCATCAACTTGC  
GGTCAGTGAAGGAAATTCGCGAGGGCTACGCCACGGACGTCTTCAACCGAAAGGAA  
AAATCAGCAGACTTTTGCGCGAAGCATCCTCCCGAGCTATGCTTCTCCTTCGTGATGA  
CGTCCGGCCAGACGGTTCGATCTCATCGCCTCGGACCAGGAAACGCGAGAGATGTGG

ATTCTCGTCACACGGAAGCTTATCGACCAGGCACAGCAGGCGAAAAGGGAGGAGCG  
TCTCGAAAAATGGCTGATCAAACAGTTTTACTCCGCTGACGTTTCCGGTGACGGTTTC  
CTGAACTTCGAGGAATGCATGCTATTGCTGGCGAAGATGAATCTGCAGTTCTCACGT  
GAACAAGCGGAAATCATATTCAAAGTGTGGACGTCAACGGGTTCCACCGCTTCTAC  
GTTTCGTTCTCCGCTCGGCCGGAAGTTTCGCGCCCTGTTCAAGCGTTACGCCTGGAAGC  
GTGGTCCCACTTGGACGCTGGAGAAGTTATATCGCTTCTGTTGGACGAGCAGAAGG  
AGTGGGAGGGGCAGTCTGATATCGGTCAGGACCTGGCGGAGACCTGCGGCTGGATG  
GTGGAGACCTTTGAACCACTGGAAGAAAATAAGACGCTGAACTTGCTCAGCTTTGCT  
GGCTTTCGCAACCTCATGCTCAATTCTCGCCAGATGATTTTCTCTCCGCGATGCCAGA  
TGGTCTATCAGGATATGACACATCCCTTGCAGCATTACTTTATCGCTTCTTCGCACAA  
CACATATCTGGTGGATAAGCAGTTGATGGGGAGTAGTAGCATTGAAGGGTACATTGA  
CACGGTCTTGACCGGATGTCGTTGCCTGGAATTGGACTGTTGGGATGGACCTAATGG  
TGAGCCAATGATAACGCACGGGTACACGATGTCGTCCAAAATGGACTTCAAGCATGC  
TCTCGTTGTCTTGGCTGACTATGGATTCAAGACCTCCGAATATCCTCTCATCCTTTCTC  
TGGAGAACCCTGTTCCGCTCCGCAACAGCAAAAAGATGGCCCACTATCTGAAGGAA  
ATTTTTGCCGAACGCCTGTTACCGCAACCAAGGCTGACACCGAACGACTTACCCTT  
CCATCCCCGGAAGAAGTTTCGCGGTTGCGTTTTTCATCGTTGCAAAGAACTGCCCGAT  
GGCCTGCCAGACGACGCCCTAGAATATGCTGAAGGAGATGTACAGAGCAAAAACAGC  
CACTGGTGTTTTAAACGGAAACAAGCTCGGAAATGTTCTACAATCCATCAACAATCT  
TGCTCAAGCCCCGGTTGGACTGCTTGGCGCTTCCAAAGTCGCAAGGAGCTGTCTGA  
CTGTGTCTTTGTCCGTGAGGTCCCCTTCCGCGGATTTGTGGTTGCCAAAGACGATGGT  
CATTCTCACGCCATGGACAATATCCCCGAGCCGAAGATGCGATCCCTCGTGCAAGAC  
AGCCGCGAGGAATTCATCCGCCATACCCAGCGGCACCTCGTGCGGGTCTACCCCGAT  
GGGCTGCGCACCGACTCCAGCAATATGAACCCCATCCCGGCTATGGCGTCCGGCTGT  
CAGATTGTCGCCTTCAACTACCAGAACAAGTCCCGAGAGACGCAAGTCTATCGCGCC  
CTTTCGCCGACAACGGAGGGTGTGGTTACCTGCTTAAGCCGGAATTTATGCGCCAG  
TCTCCTCCCGGGTTTTCCGGACATGTCGCAGGCTCCCGTGAGACCACTTCGGTTGAAG  
GTTCCGGTGATCAGTGCACAACAGCTGCCGAACTGGTGGCAACCTCCGATAAGGAC  
ATTACCGATCCGTATGTCGTGGTGGAGGTCTTCGGATCCGATCGCGATATGAAGATC  
TGCAACACCAATTCCGTTCAAATAATGGATTCAACCCGACTTGGGAAGAGGAGTTC  
CACTTTCGGGTGCACGATCCCAATCTGGCGGTCTTGCCTTCGAGGTCCGCGACATG  
GATCGGCGCACTCGAGACGTGATTGGGCAGTACAGCATTGCCGTTGGTTGTGTCCAG  
GAAGTTTTTCGCCACGTCCCGCTGCTCGATTCCCAGGAACAGCCGCTCGATTTGACC  
ACACTGTTTGTGCATATCGAAAAACGTGTAATATGACGTGA

>maker-scaffold2832\_size19901-snap-gene-0.12-mRNA-1

ATGTTTTTAATTAAGGTGCAGACGCGTACGTAACAGGCGTGGGTTCGATTCCGCCACG  
GAGCTGGATAAACTCGTCTTGACAAGTGTGCACAAGCTTCAGATTTCCGCAACAAG  
GACAAGTGGCCAACGTGGATTACGACAGGCAGTATTTCCCGAGCTGCTATTTCGAACG  
CTTTTCGAAAATTTAGTCAAAGTTTACAAGTGGCAAAGTTCGTCAATCATCTGCGATG  
TGAACAGCAACAGCATTTTTGAAGCTTACTCGGCTTACATTGGCCAAGTCTTACAGA  
CCGCAACAGCAAACGCTCAGATTGCCGCTTTTTCGGATTAACATGACAGAGGGCGATT  
ATATGTCACCACATCCGACATCAACTTACATGACCATGATGGCTCTAGCGGAGGTCC  
TTCTGGAGCAGGATACTGTGCAGTTGAAATTGCGCGTCCAAAAGTGCATCACAGCA  
TACAATACGGTTTTGGTTTTTCGGATGTGCACTCTTGGGCATCGTGGTTCATCAGCGTTTT  
ATTCTCTCAACGGCAAGTGCCAGATTA

>maker-scaffold18460\_size4438-augustus-gene-0.5-mRNA-1

ATGTTTTTAATTCGACTGGAGAAAATCGTTCAAAGTTCGTTTAAACGACCGATTCTG  
AATAATAATCTTCCACCGGGAATTATCAGCCAGGAAATCTTCCGGGTGCTCGCGCC  
TGTTTGCCTCGCTATCACGCCATCGAAGGAGACCTTTCGACCAAGTCGCATCTTCC  
CGTTGATCGGAGCGCGAAACGGATTTGCAAGTCGCACGTACTGTAGCATCGCCGGAA  
TGCCCAACAACGGAACTAACGGGACTGCGGCCGCGGAGGAGGCTGGCTTACCAAC

AAGAAAGCCTTTGAGCGTCTGCCAAAACGGTCGTCCCAAGCACTACGAGCTCCGC  
ATCCAGCCATACCTGAAGGATGCCACGTTTGATGGACGAGCGGTTGTCCACGTTAAG  
GTCAACGAGGCTGTGAATCGACTCACTGTTGACTGCGCGGAGATCAAGCTAATTGAA  
GTGGTCTTCGTCGGGGAAGACGGCAAG

>maker-scaffold824\_size34768-augustus-gene-0.28-mRNA-1

ATGTTTTTAAATCGACTGGAGAAAATCGTTCAAAGTTCGTTTAAACGACCGATTCTG  
AATAATAATCTTCCACCGGGAATTATCAGCCAGGAAATTCCTCCGGGTCGTCGCGCC  
TGTTTGCACCTCGCTATCACGCCATCGAAGGAGACCTCTTCGACCAAGTCGCATCTTCC  
CGTTGATCGGAGCGCGAAACGGATTTGCAAGTCGCACGTA CTGTAGCATCGCCGGAA  
TGCCCAACAACGGAAC TAACGGGACTGCGGCCGCGGAGGAGGCTGGCTTACCAAC  
AAGAAAGCCTTTGAGCGTCTGCCAAAACGGTCGTCCCAAGCACTACGAGCTCCGC  
ATCCAGCCATACCTGAAGGATGCCACGTTTGATGGACGAGCGGTTGTCCACGTTAAG  
GTCAACGAGGCTGTGAATCGACTCACTGTTGACTGCGCGGAGATCAAGCTAATTGAA  
GTGGTCTTCGTCGGGGAAGACGGCAAG

>maker-scaffold13943\_size6700-snap-gene-0.3-mRNA-1

ATGTTTTGTTCATGGGGTGCTGAAGAGTATGGCTTGATCGGATCGGTTGAATACGTA  
GAAGTAAGCATTACCTCATCTATAGGAACCGGTCTTGGATCAGGTAGTGATTATTTT  
GCTTCAATCAATTAGCTGGTTCATCAAATGTCGATATACGATATACATTTAATCCAG  
CTGATCAAGGAAATCTCGGTTTCATATCCACTCTATCATAACATCATATGAAGTATTTT  
AATGATGAAAAGTTTATTGATCCTGACTTCTATGCACACAGAGCTGTAGCTCAATTT  
ACCGGTGTTTTAGCATTACTTCTTTCTGAAACACCTGTCATACCATTCAATGTTAATC  
GATATACAACTGCTCTTCGAGAGACAATGAGCAGTCTTCGACCAAGCGATCCAAGTG  
TTCTCAATCCACTGAGCAAAGCCATCGATGATTTTCGATAAAGTCGCTCAAGATTTTGT  
TGCACGATCAAAAACAATGGATACTGCCAATCCTTATATCATTTCGTGCATATAACGA  
TCAAGTCTTGCAGCTAGAACGAGCCTTCTAAATCCATTAGGACAAGGTGGTGACTA  
TGCAGAGATGAAGCATGTTATTTATGCACCAGCGAAGACTAATCAATACGCGGCTGA  
TGGTTTTCCAGCGATTAATGATGCAATTAATGGTGGTAATCTAACAGAAATTAACAC  
GGAAGTGGCAATTACAACATATTTTCATTCGTGGGGCTATCTCAACATTAAGAATT  
CAATAAATTTATCGCTGCATAG

>maker-scaffold306\_size52563-augustus-gene-0.28-mRNA-1

ATGTTTTGTGTATTCGGCTTGCTGGTCGTTTTTGTCTGCTGTCACCATCGTCGGACCAGT  
TCAGGCTGTACCGGCAGCAGCACACCTGACGAGGTCGTTGAACGCGGATCCGCTGTG  
GACAAAATGGCCGACCAGCAATATCTTACTACATCGACGCATCTTATACACCTGA  
ACAGGTGACTCAAATAAGAGCTGCGATCGACAAGGAAACCCGCTGCTTTGCCTATCC  
CGGCATCTACGTACCACTCAAAGACAGCGGCGCTAAGGAACAGCGCGTTGTCTTAAC  
CGACGGTCCCACCGGATGCTTCGACGGCTCTCTACACCCCTTGATGAAATACTTTACT  
GTGATTCTCGGAAAAATCAACGAACATCAACGCCAGATCGGGATGACTTTATCAGA  
GTCAACCAAGGAAATTTAGTCGCCAACACTGTCAACATTTACCGGGAACACACGGAA  
GACGGCAGCAAAGGCGCGTGTCCCTATGACTACTGCTCCATAACGCACAACCAACCG  
GATGTTTATTCGAAAGAAGGCGAAGACGGCTTCATCGTGCGCAACAAGCCATTCTAC  
ATTCCTAAATTGAATCGTCTGTGACAGAGTGTGATTGTAAAGACCTCAGCTCTATCTATG  
CCGGATGCGACGCCGCCAAATGCGAACCTTTAAACTGCGCCGATTTGGACGGCGCTG  
AAGGAGATGAGGAGGAGGAAAAACAGTCGAATGA

>maker-scaffold303\_size53230-augustus-gene-0.26-mRNA-1

ATGTTTTGTGTATTCGGCTTGCTGGTCATTGTTGCTGCTGTCACCATCGTCGGACCAG  
TTCAGGCTGGTAATAGGACGCTTATTCTGGATGACTGCAAAGAATCTGAATGTTTAA  
AATACGTTTGTTTTTCCAATGATAGTACCGGCAGCAGCACACCTGACGAGGTCGTTG  
AACGCGGATCCGCTGAAACCCGCTGCTTTGCCTATCCCGGCATCTACGTACCACTCA  
AAGACAGCGGCCCAAAGAACAGCGCGTGTGCTTAACCGACGGTCCCACCGGATGC  
TTCGACGGCTCTCTACACCCCTTGATGAAATACTTTACTGTGATTCTCGGAAAAATCA  
ATGAACATCAACGCCAGATCGGGATGACTTTATCAGAGTCAACCAAGGAAATTTAG

TCGCCAACACTGTCAACATTTACCGGGAACACACGGAAGACGGCAGCAAAGGCGCG  
TGTCCTATGACTACTGCTCCATAACGCACAACCAACCGGATGTTTATTCGAAAGAA  
GGCGAAGACGGCTTCATCGTGCGCAACAAGCCATTCTACATTCCTAAATTGAATCGT  
CTGTCAGAGTGTGATTGTAAAGACCTCAGCTCTATCTATGCCGGATGCGACGCCGCC  
AAATGCGAACCTTTAAACTGCGCTGATTTGGACGGCGCTGAAGGAGATGAGGAGGA  
GGAAAACCAAGTCAATGA

>maker-scaffold3143\_size18844-augustus-gene-0.16-mRNA-1

ATGTTTTGTCGTGTGACGCCGTTAGTGTGACGGCCTTCTAGAGCGCCGAATTTATTAT  
GGAATTGCGGAAATTGTCCCGGAGTTCGGCAAATGCAGCACGACATTTCCCTCATCG  
TCTGACCCGAGATTTTGCCACAGCCGCCGCTGCGACGCCCAAAAACCCCCAGTA  
CTGCTCGACCGTTGCGGCGGATTCGGGGTGTGAGCCACCAATGCGGGCTGAGTACT  
TTGAGGATTGGAAGGAGATTGTGGTGACCGGTGGAAGCGGTGGGAATGGGATATGC  
TCCTTTTTAAGCCTGCCCTACACAGAGTACGCCGGCCCCGACGGAGGAGACGGCGGG  
AACGGCGGTCATGTCATATTTGAAGCGACGCACAATTTAATAGTCTCAACCATGTC  
AGCGCGAAAATAACGGGGCAGTCGGGGACGAAAGGCCCGCAGCAAAGACATGCACG  
GAAAGAGCGCCCCGCCTACCGTGATCCAGGTGCCGTTGGGGACCTTATTCCGCGATC  
AAAACGACCAGCTGGTCAAAGAACTCAAACGGAAAGGCGAGAGGTTTGTGCGCTGCT  
CGGGGTGGAGCCGGTGGGAGAGGAAATGCCTTTTTCAAGTCCAATGACCTTCGTGCA  
CCGATGGTTCGGATTTCCGAACGCCGGCAAGTCCAGCCTCCTCCGAGCTATCAGTCGA  
GCCCGGCCCAAGGTGGCCAGCTATCCGTTACCACCCTTCAGCCGTACGTGCGGTAC  
GTCGAGTATGAAGACTACGTCCAGATTGCCGTGCGGGACATTCGCCGGCCTGGTGCCG  
GACGCCACAAAAATCGCGGCCTCGGCGTCGACTTCCTCCGACATATCGAACGGTGT  
CTGGAGCATCTCCGCTACGAGCTGGACATGTACCGGCCCGGGCTGGCGGACCGGCCG  
TGCGCCATCGTGGGCAATAAAATTGACCTGCCGGAAGCGGTGGCCAACCTCCCCGCC  
TTCGAGGCCGAGGTGAAGATGCCGGTGTTCGGGTGTCCGCGATGAAGGGCATGAAC  
ATAACCGCCCTGCTCATGCACATCCGCAAGCTGTATGATGAACATCCGGAGGAGACC  
CCGCCCCGGATGAGGACGATGAAGAATAA

>maker-scaffold2706\_size20279-augustus-gene-0.9-mRNA-1

ATGTTTTGTAGAAGTGTGAAAGACATTGACCTGTACCCAGCGGGAATTGCAGAGGTT  
TTTGTGGACGGGGGTATAATCGGCCCTACATTTAGCTGCATAATCGGAGAGCAGTTT  
CAACGTTTTCGTTCAGGCGATCGGTTCTGGTACGAGAATGATCTTCCATTGCCGTCAC  
GCCTCACTGATGATCAGCTCGATGCCATTCCGGCAAACCACTCTTGCGAGTGTCTCTG  
CAGTAACGTTGCCGGAATAAATTCCATCCAGGCCAGCGTATTTGCGACAGTTTCCGA  
TTCATCAAACAACGAGAGTTGTCAAATGCTAGCTATTCCGATGAATATTATTATATTT  
TGTATGGCATTGCAAGCCGTTACTCACGATGTTCAAGCCGAGTCCAACAATTCGACC  
ACCCGTA CTCTGTTACCATTCCAATCTCAAGTGCAAATGCAGGCAGCAGATGATAGC  
AACTCAACGCAGACATTAACGGGAGGCCATCCCGTTCAAAAAAATATTCAAATAAA  
AGTTCATAAAGGAGTCGAAACGGATTCAAACCATGCCCCACCCACATCAAACGTGC  
AGTTCCTGCCGGAATAACACAGCGATATAACAAAAAATCCACATTTCCAGTTGCCTC  
ATCGCGGTTGCGTTTACCCGGAAGACGCCGACTTTTCTGACGTCAGATTTTTTACCAA  
ATTCTCGGCCGAAAATTTAGATCCTAGCCTGTGCACATACATCATATCCCCAGCGG  
AAGTATCCAGGGTTTGA CTTTGGCACTAACCTACCAAACGACACGGATTTGTTTCG  
ATTACTCCGCCAACACAAGGCGTCATTCCCCTTACTCAAGTTGATCCTCAGTGTGGGT  
GGCGAAAATAGGACGCACGAGCTCAGCGAAATGGTTGCAGTTCACGGCATCGAAGT  
ATTTGCAGCATCCATTGCGGCCAAGTTGCGCGGTTGGGGTTTGGACGGCATAGATGT  
ATACTGGA ACTGGGAGGTTTCGCCGTTTCGCTCGGACGAAATACTTCTCCCTGTTCTC  
CTCCAGGCTATACGGAAAGAGTTCGATCGAGAGAGTTTGGAGACTGGAAAGGAACG  
GTTGGCTTTGTCCACA ACTCTTCAGGAAACTTCCCAA ACTAACAGCATAAACGGACC  
TGCCCTTGGATTGGTAGTAGACATCGTTCATGCCGTATCGTACGATCAGGGCAATAC  
CGCCTTTGCCACTCTTCACATTGCCCATATTCTCCACTCTTCGGTGGACCATTTGGGT  
ATCCCATCCAAGGCTAATCTGCCGGGAACGATGAAGATTGCCTCGTACTAG

>maker-scaffold1433\_size27365-augustus-gene-0.27-mRNA-1

ATGTTTTGTAAGTACTTTAAGCAGCAGGCAGTTAAGGTCCAGCACAAGTTCTACCCC  
TGCGGCTTAAACCGCAGCTGCGACATTTTTTCGATGGCATTCTCTTACGATATGAAGG  
GGGGCGAGGTCTATCGCCAGCTAACCAATCTATACCCCACCCACGCCTGCGAAACTT  
ACAACAGAAACTTTCAGCTCCTCATCAAGCACCTTGGATTGAGCGAGCATAAAATTC  
CCCAGATGGAGGACATCTCAAACCTTTTAAGAAGTTCGCACAGGATTCCGTCTGCGTC  
CGAGTCCCGGACTCGTGGACTTTCGCGATTATCTTGCCGGCTTGGCTTTCAGGGTCTT  
TCAGGCCACGCAGTACATCCGCCACCATTTCATCGCCGCAGTACACGCCGGAGCCGGA  
CATTGCCATGAATATCTGGGTCAATGTGCCGCTGTTCTGTGATCCCGAATTCGCACAG  
TTTTCGCAAGAAATTGGGCTCGCTTCGCTCGGAGCACCCGACGAATGGATCGAAAAA  
CTTGGGAACTTGTACTGGTACACCGTGGAGTTCGGTCTGTGCCGGGAAAATAACGGA  
GCTAACACGCGGGTCTATGGGGGCGCTCTGCTGTCATCCTTTGGAGAACTCGAGCGT  
TGTCTCACCGATGACGCCAAACGTGTGCCACTCGACCCGGATGTAGTGGCCGCCACG  
CCCTATCCCATTACACGGTTCAGGACGTCTATTTCTGTGGCTGAGAGCTTCCAAGACA  
TGAGAGAAAAATTAGCGGGGTGGATCACCCAAATTCACGACCGTTTTTCATTGCGAT  
ATAACGCCTACACCAGCAGTGTGAGGTCTACACAAGAAGGAACACCTAAGGGGC  
CTGGTTCGCGATATTGAAACTGATATCAAATTTCTCAAGGACGCCATAACCAAGATC  
GGTGACCATTGA

snap\_masked-scaffold20034\_size3809-processed-gene-0.2-mRNA-1

ATGTTTTGTAACCTGCAACTTGCCTGACTCACGGACCCGCACCGGCACACTCGTTTT  
ACGATTTACATTACAGAAGATGCCAGAATGCGCCAAGCCATTTTCTCTCATCTTAAA  
AAAATTGGCTATAAATATTGCAGAATTTTCTACTGAACAAGTGAAGCCGGCTGATCC  
AGAACCTGTCAAGTCTTCTGAAGCGTTGTGCGACTTTTGCGTAGAATCGATAAGAGT  
CATGTCTTATTTACGGGAAAAACGGTGGGAACTCTGCTGGTGATCTTGATGACCAG  
TAGGGTCCGCGGGCGGCACTCCGACCAGCTGCGGCAGCGCATTGTGAGCGTTCCCG  
GGAGTATCCAGTAAATTCGGCTTTTCAGCGGTCCATGGAGAGTGACCCGAGGTTTCGC  
CGCATTGAAGGGCAGTGTGCGTCCGAAGGTTTCGTCTGCCATGAGTGATGACGGTGC  
GTACGGACACTTCGTAATGTCTGAAAAGACCGCGGACGACATTGCGGATCCGCTCGG  
GTGCTCTCTAAATGAGTTGGCCTTTCTTTTGCATCCAAATCTTCCGGCTGATGACACA  
CAGTATCAGATCTGCAAGTCCAAGACCGACATCATTTTCCCGCAGGAGGGCGCAGAAC  
ACCAGGGGTGAACGAAAATTCATCATCAACTTCGGACCGTTTGTCCAAGGAATCACC  
ATCGAACGCTGCATGTCAGACTCCTTCCGCATGTCTGCAACTACATCGGAACGCCG  
CCAGATTACCAATCTGTCTGTGTGCAGAAAGAGATCGAACACCGTCTGACCACCATC  
ACCAGCGACCCCGCCACCGGGTCCGTCTCCACCTCCGTGGATATCTTCCGCTTTCCCA  
GTTACTGCGCATGCAAATTTGGTCCGTGGCGGGGGCCGCGCAACGCGGGACTATGTG  
GCGGACATCCACCACCGTCGTCGGCAGCGGTCTACGGCCTGGTTCGATGCCTACGGCT  
CGGACGACGGTTCTTCCACCAATCCCAACGCGAAATCCCTTAAGTTGCCGCCGGCTG  
CCACTTTTAGGAATCGTCAAACCTGAAGTGACCAAGCAGCCTCGTGC GGCTTTGGGGA  
GCCGAACGCTGGATCTGTTCCGGTGCCTCGTCCGCGTTGACACCAGCAGCGGAG  
GTCTCTCGAACTCCGGAGGTCTCTCGAATTCCGGAGGTCTCTCGAATTCCGGCTCGCG  
TTCCACTTCTCGTTGGATGAATGGGTTCTCTTAA

>maker-scaffold762\_size36136-snap-gene-0.22-mRNA-1

ATGTTTTGGTTCCCGTTGCGTGACCGATTGGTCTGTTTGAAGGTGATTTTGTCTGGACC  
ATCGGGAAGTGAATATGACTGCAAGGCATCCGTCAAGGGGAAGGAGTTCCTCGAC  
TTTGTGCTGGACAGTCTGCGGCTGCTGGAGCGGGAGTACTTCGGGCTGCGTTATATG  
GACGATGTCGGTCAGGTGCAGTGGCTGGACACGACAAAGTCCCTGCGGAAGCAGCT  
CAACAAATGCATGGAACCCTATGTCTTCTATTTTTCCGTCAAGTTCTATGCTTCCGCA  
CCGGAAGTTTTGTGCTGGAAGAGCGCACGAGGTACCAGTTTTTCTTCAATTGAAACGC  
GACATTTTGCATCAGAATCTATCAGCCCCGGACGAGGCACTGGCGGATCTTGGGGCC  
TTCGCTTTGCAATCTGAAATCGGATCATACGAGCCCCGCGGCCACGAGCCCCGGCTAT  
CGTTCGGAATTCACGCGCTCGAACTTTGCACCGGATCCGGCACATGGTTCGATTGCAA

GCTGACGCAGAATGCGCCTTCCTGGCTCGGGCTCGGGCGACTTGATCTCTACGGTGTG  
GACATGCATCCGGTGCAGTCGGACGGGTCCGGTGACGCGGACTCCTTCCTCGGCCTG  
TCCCCGTTCCGGGTGCTGCTGATTGAGAACGACCAAATTATGGGCATGTACGCCTGG  
CCGATCATCACCAAGATCGACAAGGACGTGCAGTGGCCGCTGTTGTCTGCCCTTTCG  
TCCGCTTGCGAACTGCCAAGACAACCAGTGGCGAAACCAGCGTTCGACCGACGCGCT  
CACCGTTCGGAACCAGTATTCCGACGTGCCAAATCTACCGAAGTCCCGAGCCGACAA  
AGTCTGACCAAGTCGGCGAGTGCCCGACAACGATTGCATTCCGCATCTGTGATTCAG  
GAAGACGAGACCCGGTCGATGATGCGACCGGAATTCGACAGTGCTGGTTCGGCGAGT  
TTACCACAGTGAGATGCTGGTAGACACGACGATGGATGAGATCACCGAGTTGCGGCC  
AGTCCGGCGGTTCGGCAGGGGACGGAATGTCCACCGTCTGTCGGCGGTTCGGAAA  
GCCCTATGTCAATGCAGAGTTCTTTCTCGACCTGTCCACGCCGGTATCCACCGTACCC  
GGCACACGAAGAAGCCGGTCATGTCGCCGTTGGCACCTCCCAACGAGCGTCCACCAC  
CCTCCGCACATCCCTTGTCCCGGCGCGACGCCGAAAGATGGGGCGCAACCAACCCA  
CGATGGTATCGCGATCCAACAGGCCTTGACGCGAGTTGTCCCAGCCACAATCACCCCTC  
GCAGTACGCTTCCTTGGGTCGTGATATGAGCTTGCCGGACCGGCTTGCGGCCATCAT  
GCAACCGATGCAGCCGGTAAAGTCGCAGACTATGGTCAGTGGTGGGCGACCGAGGC  
CCCCCTGTCTGTAACCCGAACCTGGGGAAAGTCCATGAACCAGCTGAGTTATGTGG  
CGCCTTTGAGCCCAAGCATTAAAGACGTCCAAGTTGCAATGGACGGCTTCCCCCTGT  
TCTCGGTGAACCCAGCCGACACCCTCTACCTGAACTCCAACACGCTCAATCCCCGA  
TCACTCCATCGGCCAAACTGAAAGGCTTCGAAAAGTTCAGTTTCGGTGGAGGTTCTT  
CCGCCCTCAACCGCGCTCTCCATCAACCCGCGACAGCCCAATGACGATGATGCCGG  
TGTCGGCGTCTGGACAGCGGGAGAAAATTCCGTCGAGTTTTCACTGCAGCGCACAC  
CGCCTCCTCCGTCAGCGACCAAGTCGCGGAGCTTCGATTTCCAACCTCGACGCCCCGC  
AACCGCCACGCCGGTTCGACAGAGGGCGCCCCGCAACCGCCACGCCCGGTTCCGA  
CAGAGGGCGCCCCACAACCGCCACGTTTCGGCTCCGACAGAGGGCGCCCCACAACCG  
CCACGCCCGGTTCCGACGGAAGTGCCGCTAGCTCGGCCGATTCATGTCCGCAGTATT  
TCGTCGTCAGATGCAACGAAGCAGAATCCTAGTGCTCCCCGGATGCCGATGCGATCG  
CGATTACGCAGTGATGGCTGCTTCCACCCCTTCCCCATCATTCCACCTCCCACTCCGT  
TCACCGAGGAGACGATCTCCTCGCCGCCGGCCATTCCGGCGCGTAACCTGATCACCT  
GTAAGTCCACCGCCAAACGTCTCGGCCCTCGGCCGGTGGGCCCCCGCGCGGAATGACT  
CCTTACCGCCGCGCTCAAGAGCTCCGACATCGAGATGCAGTCGCTCAAATCGGACG  
TTGTCGCTTCCCCGAACGCCGGCCAGTGCTGAAGAAGCGAGTCCGTTGTTTGGCTC  
GGTGCCGGTGCCGACAGACCTCCACGTGGTGGTGGAAAGCCGACGTGCACGTCTCCAA  
CGTTACGATCATCGCCGACGAGTGCAGGTTGATGATGCTCTACCGATGGGGAA  
TCCAAACTGAGCAACGGACGATCCAAGACGTGCTGCTGGGATGCGGTCAACCGTT  
GCTGCCTTCGACTGCCTCCAACCAGATGTACTTTGAAATGAATGGCCATGACTCCGG  
GAAGGATTCTCAGACTAGTGGTGGTGGTCAGTCATGGAGGAAAGCCGGGTATCCTGT  
GACACCTGTGCACCCGGTGCAACTCCCGTCCGTCTGTCAACCAATTGTCCCTCGTCC  
ATCAGCCACCCGCTGGCAATGGTCCATTCCAAGCGACGGGAGAGCTCAGAAAAGAA  
GAATGCGTGGTTATCGCCAAGTGGTTCGGCTGGCACGTCTCCAGCAACTCTTCAGC  
ATCCCCGACGGACGAGAATGATCCCACCAGTTTTGGGAGTCTCAGGATAGCCACTC  
GTCGTTAAAGAAGTTGCAGGCCATCTACTCCAACGACAACGGCTACGCAATACGCAT  
TACGGCATTTCCTCTGACAAGATTAAGTTTTTTTTTCCCGCACCAACCTCAAAGCAA  
TTTCTGGCCACACGCGCAGAAGCGTCTTGAAAGACATTCCCTCCACCATGACGAGT  
TCCACCGTCCAAATCACATACCCGTCTTCCGCAGTCTTCTCACTCCGGAATAAAG  
TCTCTCGGAGATGTTCAAGGAAAGGGGATTCGAATTGCGGATCGCGGGCGGAGCA  
GTACGGGACATTTTAATGAACATTGTGCCGGTGGATATTGATTTGGCGACCACCGCG  
ACGCCGGACAGATGAAGTTGATGTTCCAGGAGAATGAAATCCGGATGATCAACGT  
AGGCGGGGAGAAGCACGGCACGGTCACTGCGCGCATCAACGACCAGGAGAATAACG  
AGATTACCACGTTGAGGATCGACAAAGTGACGGACGGGAGGTTCCGCCGAGGTGGAA  
TTCACGCGGGATTGGGTTGTGGATGCCAACC GGCGAGATCTCACAATCAACTCCATG



TTTCTCGATTTGGAGGGGAATTTGTTTCGACTTCTTCAACGGTTCGGAGGATCTCCAAA  
AGCGGGTGATTTCGTTTTGTCGGCGAGCCGGACAAGCGAATCCAAGAAGACTACCTGC  
GAATTCTGCGGTATTTCCGCTTTTTTCGGGCGGATCAGCAACGGTCCGGATGACCACG  
TCCCGGAAACGCTGGCAGCCATCGCGCGAAACGTGGAAGGACTGGAACGGATCTCC  
GGTGAGCGATTGTGGACCGAGCTCCGTCAGATCATGGTTCGGACGATTTGGCGATTCCG  
GTCATCGTGAAGATGATGGACACCGGGGTGGCGGCCATCTCGGCCTGCCTGCTCAA  
CTGAACGTGGAGGAGTTGGACGTGGTGTGGAAGCGGTGCCATGCGATGAAGCCCAA  
GCCGATTACGATCATCACTGCCCTCCTGCATTGAGAAGAAGACATTAACAAGTTGGA  
CGAGAGGCTGAAGCTCTCAAACGAAGAGTGCTCCCTCGGTGTCTTCATCCTTCGTCA  
TCGTTTTCAATCCAGCTCTCTTGGACTTCTGCAAGAGCAATTCGAACGCCGACCCCTTC  
TTCCCATACCGACGCCTCCTCGCCGAGGAGATGCTTAACCTCCCAAGCCCAATTGG  
GCCAAATCTCACTGCATCGAACTGTTGAAGTACCGCGGGGACAGCGTCTACTTCAA  
GCCATGGAGGAGTTTGAAGTGCCGAAATTCGCGGTGACCGGTGATCGCTGCTGGCG  
ATTGAAGCCGTCCCGAAAGGCGGTCGCCAGACGGCGCACGTCTGCACTCCCTCCGC  
GCTGCTTGGATCCGGAGTGATTTACCAGAACCAGGATGAACTGCTGACGGTGGAT  
CTGCCGGTGATTTTGCATAATTTGCAGCATCAGACGGAGGAGAGGGGAGAGAAGAA  
GCCGAAGAAGGCGCGGAACAAGAATTGCAGCTGA

>maker-scaffold7610\_size10871-augustus-gene-0.8-mRNA-1

ATGTTTTGGGGCGGTGTTCCGCGTTACGAAGAAGTTGCTCTGGTGAACGTAACGGGA  
ATTGTGGAGAAGATAGAACACTGGGGTCTATCAAGACAATGGACCAGCATAAGTG  
TAAGGATCTGCTCTCCGCGTATTTATTCCCGTTTTTGA AAAAGAACTGCGACCAGGTT  
TGGGTGTTCCAACAGGACAGTGTGTTGATGCGCAACTTCAA AATTATGAAGGAATGG  
TTTTGGAGTCGACGTGCCGTTGTGGGCTGCGAAATCGCCCGATTTGAGCATTATTGA

>maker-scaffold2415\_size21471-augustus-gene-0.5-mRNA-1

ATGTTTTGGGGCGGTGTTCCGCGTTACGAAGAAGTTGCTCTGGTGAACGTAACGGGA  
ATTGTGGAGAAGATAGAACACTGGGGTCTATCAAGACAATGGACCAGCATAAGTG  
TAAGGATCTGCTCTCCGCGTATTTATTCCCGTTTTTGA AAAAGAACTGCGACCAGGTT  
TGGGTGTTCCAACAGGACAGTGTGTTGATGCGCAACTTCAA AATTATGAAGGAATGG  
TTTTGGAGTCGACGTGCCGTTGTGGGCTGCGAAATCGCCCGATTTGAGCATTATTGA

>maker-scaffold645\_size38650-snap-gene-0.27-mRNA-1

ATGTTTTGGCGTTTTTTATGCGTGGTTTTCGCTCTTGGCAGCAGGTGCTCTAGCTGAGA  
CACGGCAAGGCGATGTCTTTGATGAATTCTACACATTTCGATGTGACCATTCCGAAGA  
CGACTATCCCGTCTGATGCCCGGTCAAACGTGACGTTGTATCCCCGAGCAACGAGG  
GTCACTTGAGCCAGCGCCAAGGGACCTCACACCGGCGTCGTCTTCAGTTCGATGCCT  
TCGGGCAATCCTTCGACTTGGACTTGAAACTAAACCCCGATCTCGTGCCCGATGGAT  
TTCAAGTGGCGGTGCATAGTCGCGGTGGGATTAGAACATTTTCGGCCTCCTGTCGAGA  
AGTGCCATTACCGGGGAACGCTGAACAACGCGCCGGAATCAAACGTGCGAGTCAGC  
CTTTGCAACGGTGGCGTGAGTGGTTTCATTCAAGACGGGCATGGAGAGACGTTTTAT  
TTGACGACGGATAGTGCACAGCCGGGAAAGATGATGGTTCATGCGGGAGTCTGACAA  
GATTCCAGTCATGGAAATTTGCGGAGTCGATCTTGATGGCGTGGAACCGGATAGGAA  
TCTCACGCGAATAACGGGCTCGATCAAGCCGCACCATCATTCACGGACACGAAGAA  
GTCTCGATCAGCCGTCCTCCAGTGACCGTAACTCCCTCTATGTGGAGCTCGTTATGGT  
CGGCGACACGAAGCTTTTCGAGAAGTATAAGAAAACGAGACTCTCGTTATCAATCG  
CTTCGTGGAGATTGCCAGTATCGTTAATGCGTTATACACGCCGCTAGACATATTCGTC  
GTGCTGGCTGGCGTCGAGATTTGGACCGACACGGATAAGATTGCTGTGTCGAATGAC  
TCGGAGACCACCCTGAAGA ACTTTCTACGCTATCGGAAGCGGGACCTGATCCCTCGC  
ATGCCCAATGACAATGCCTATCTGATTTTCGTTTAGCAATTTTGAGGGGAGTGTGGTTCG  
GAAAGGCGCTGAAAGGACAAATGTGCACGTACGAGTACTCTGGTGGGATCGCAAAG  
GATCATAGCTCGCTCTCTGGTCCGGTTGGCGCAACAGTTGCTCATGAACTAGGTCAC  
AATTTCCGGTATGGAACACGACTTCACCGACTGTAAATGCCCCGAAGATAGATGCATA  
ATGACCCCGAGCTCAGTTGGCGAAACACCATCCA ACTGGTTCGTCCTGCTCAAAAAG

TATCTGGAGGACCATCTGGCGCGTGGGATCGGCACGTGCCTGAAACGGGCGCCGAA  
AACGGTCCCTCACTCTTATTGCGGAAATGGATTCCCTCGAGGAGGGTGAGGAATGTGA  
CTGCGGGCCGAAAGAGTTCTGCCGAAACAGGTGCTGCTTGGCGGAGACGTGTACTCT  
GTCGATTAATTCTACTTGGCGTACGGTTCCTGTTGCGACTTCTGTAAGACGCACGAC  
GATCAGTGCCAGTTCCTGTGGGGCAGTACGGGCAGAGAAGCAGACAACAAATGCTT  
TTTGCTCAACGCCAAAGGAAATGCCAACGGCAACTGCGGTACGATAGAATAACTG  
ACAATTACACTAAATGCGCCTCTGCCGATAACCGGTGTGGACTTCTTCACTGTTCTAG  
CCAAGTCGACCGGCTGGTCGTTGGGTCCGACAGTGGACTTCCGTGAGCCAGTCCTA  
TATTCCTGCCTCGACCACTTATATAAGCTGCAAATCCGCCTACGTTGACTTCGGACTG  
AGCATACCCGACCCGGGCCTGGTGGCGAGTGGAGCAAAATGTGGCACCGATATGAT  
GTGCCTGAACCAAATTTGCACTCCATTGCCACCTCCCGCACTACTGCCCTAACAAAC  
TGCGGCTCCACCGGGGTCTGCAACAACGCCGGTCATTGCCATTGCCACGACGGTTAT  
TCTCCTCTGACTGCTTGGGCAGCGGCTACGGCGGATCCATCGACAGTAACCCATCC  
AGCACCACCGACTCGTACCGCCGCTTCCGGGACGCGATGCTCATCATCTTCTTGTCA  
TCGTACCTGTCATGGGTGTTGTGATTTATCTCTTCCGCTTCCGAATCCGGGAATGGCT  
CATCAAACGCTGTAAACGTGGAGGTTCTCGCCGGAGATCGTCTGCTCCACCGGCAGC  
GTCCGCAACGGTGAAGAAGCCCAATCATCCGAACAAAGGCAGTATGCGTGGTATAC  
GAATCTCTGAGCCGGTTCAGTCAAGGACGGCCTTAACGACACGGTGGTGGTCTTC  
AGATGGACAATGGAAGAATGACGGCGCATAACGCAACTCTCACCGGAATCGTGGCCG  
GTGATTAAGGAGCAGGGATACTTCCCGCCGAGCGCATTGCCGCCACCGCTGCCGTCA  
AAACCACCAAAGCTGTCCGGGAGATTCCCGTGGCAACCGTCACACCGGTTGTTCCG  
GTTCTCAAGTTCGGTTTCAGTCTCTGAGATAAAGACGAAAAAGAGCGCGGAATCT  
CCGGTGTCCGTCGAAGACGTCTCCCAAGTGTGAGACCCGTTAGACCAGCTCCGGCT  
CCGCCACCGCAACCGACTGTCACCGCCGTCAGTCGGAATTCGTCTACGAGTTCGAGC  
AAACGCCAGCGGCCGTTGGTTCGGCCCGCGGATCCCCGCCAAGCCGATCGCGAAA  
GGAGGTGGAAGGAGCGCTGCTGACAAAACGTGTGATAGCCAACAATGGCCGACCAGA  
GACCAAACCTATGACCACAGAGTCTAGTCTGTACCAAAGAATACTCTTGTTCGGA  
GCTTGCCCGGCGGTTTGAAAGCCGAAGAGCCGCTTCTGGGAACCAGGATAATGATGA  
GTCGACCGATTGA

>maker-scaffold1902\_size23957-snap-gene-0.21-mRNA-1

ATGTTTTGGCGTTTTTTATGCGTGGTTTTGCGTCTTGGCAGCAGGTGCTCTAGCTGAGA  
CACGGCAAGGCGATGTCTTTGATGAATTCTACACATTTCGATGTGACCATTCCGAAGA  
CGACTATCCCGTCTGATGCCCGGTCAAACGTGACGTTGTATCCCCGAGCAACGAGG  
GTCACTTGAGCCAGCGCCAAGGGACCTCACACCGGCGTCGTCTTCAGTTCGATGCCT  
TCGGGCAATCCTTCGACTTGGACTTGAAACTAAACCCCGATCTTGTGCCCGATGGATT  
TCAAGTGGCGGTGCATAGTCGCGGTGGGATTAGAACATTTCCGGCCTCCTGTGAGAA  
GTGCCATTACCGGGGAACGCTGAACAACGCGCCGGAATCAAACGTGCGAGTCAGCC  
TTTGCAACGGTGGCGTGAGTGGTTTCATTCAAGACGGGCATGGAGAGACGTTTTATT  
TGACGACGGATAGTGCAAAGCCGGGAAAGATGATGGTCATGCGGGAGTCTGACAAG  
ATTCCAGTCATGGAAATTTGCGGAGTCGATCTTGATGGCGTGGAACCGGATAGGAAT  
CTCACGCGAATAACGGGCTCGATCAAGCCGCACCATCATTCCCGGACACGAAGAAGT  
CTCGATCAGCCGTCCTCCAGTGACCGTAACTCCCTCTATGTGGAGCTCGTCATGGTTCG  
GCGACACGAAGCTTTTTGAGAAGTATAAGAAAAACGAGACTCTCGTTATCAATCGCT  
TCGTGGAGATTGCCAGTATCGTTAATGCGTTATACACGCCGCTAGACATATTCGTGCT  
GCTGGCTGGCGTCGAGATTTGGACCGACACGGATAAGATTGCTGTGTCGAATGACTC  
GGAGACCACCCTGAAGAACTTTCTACGCTATCGGAAGCGGGACCTGATCCCTCGCAT  
GCCAATGACAATGCCTATCTGATTTGTTTAGCAATTTTGAGGGGAGTGTGGTCCG  
AAAGGCGCTGAAAGGACAAATGTGCACGTACGAGTACTCTGGTGGGATCGCAAAGG  
ATCATAGCTCGCTCTCTGGTCCGGTTGGCGCAACAGTTGCTCATGAACTAGGTCACA  
ATTCGGTATGGAACACGACTTCACCGACTGAAATGCCCCGAAGATAGATGCATAA  
TGACCCAGCCTCAGTTGGCGAAACACCATCCAACCTGGTCGTCCTGCTCAAAAAAGT

ATCTGGAGGACCATCTGGCGCGTGGGATCGGCACGTGCCTGAAACGGGCGCCGAAA  
ACGGTCCCTCACTCTTTTTGCGGAAATGGATTCCCTCGAGGAGGGTGAGGAATGTGAC  
TGCGGGCCGAAAGAGTTCTGCCGGAACAGGTGCTGCTTGGCGGAGACGTGTACTCTG  
TCGATTAATTCTACTTGCGGTCACGGCTCCTGTTGCGACTTCTGTAAGACGCACGACG  
ATCAGTGCCAGTTCCTGTGGGGCAGTACGGGCAGAGAAGCAGACAATAAATGCTTTT  
TGCTCAACGCCAAAGGAAATGCCAACGGCAACTGCGGTACAGATAGAATAACTGAC  
AATTACACTAAATGCGCCTCTGCGGATAACCGGTGTGGACTTCTTCACTGTTCTAGCC  
AAGTCGACCGGCTGGTCGTTGGGTTCGGACAGTGCGACTTCCGTGAGCCAGTCCTATA  
TTCTGCTCGACCACTTATATCAGCTGCAAATCCGCCTACGTTGACTTCGGACTGAG  
CATACCCGACCCGGGCTGGTGCCGAGTGGAGCAAAATGTGGCACCGATATGATGTG  
CCTGAACCAAATTTGCACTCCCATTTGCCACCTCCCGCACTACTGCCCCAACAACTGC  
GGCTCCACCGGGTCTGCAACAACGCCGGTCAATTGCCATTGCCACGACGGTTATTCT  
CCTCCTGACTGCTTGGGCAGCGGCTACGGCGGATCCATCGACAGTAACCCATCCAGC  
ACCACCGACTCGTACCGCCGCTTCCGGGACGCGATGCTCATCATCTTCCCTTGCATCG  
TACCTGTCATGGGTGTTGTGATTTATCTTCCGCTTCCGAATCCGGGAATGGCTCAT  
CAAACGCTGTAAACGTGGAAGTTCTCGCCGGAGATCGTCTGCTCCACCGGCAGCGTC  
CGAACGGTGAAGAAGCCCAATCATCCGAACAAAGGCAGTATGCGTGGTATACGAA  
TCTCTGAGCCGGTTCAGTCAAGGACGGCCTTAACGACACGGTGGTGGTGGTCTTCCAGA  
TGGACAATGGAAGAATGACGGCGCATACGCAACTCTCACCGGAATCGTGGCCGGTG  
ATTAAGGAGAAGGGATACTTCCCACCGAGCGCGTTGCCGCCACCGCTGCCGTCAAAA  
CCACCCAAAGCTGTCCGGGAGATTCCCGTAGCAACCGTCACACCGGTTGTTCCGGTT  
CCTCAAGTTCCGTTTTCAGTCTCCTGAGATAAGACGAAAAAAGAGCGCGGAATCTCCG  
GTGTCCGTCGAAGACGTCTCCCCGAGTGTGAGACCCGTTAGACCAGCTCCGGCTCCG  
CCACCGCAACCGACTGTCACCGCCGTCAGTCGGAATTCGTCTACGAGTTCGAGCAAA  
CGCCAGCGGCCGTTGGTTCGGCCCGCGATCCCCGCCAAGCCGATCGCGAAAGGA  
GGTGGAAGGAGCGCTGCTGACAAAATGTGATAGCCAACAATGGCCGACCAGAGAC  
CAAACCTATGACCACAGAGTCTAGTCTGTCACCAAAGAATACTTTGTTTCGGAGCT  
TGCCCGGCGGTTTGAAAGCCGAAGAGCCGCTTCTGGGAACCAGGATAATGATGAGTC  
GACCGATTGA

>maker-scaffold1958\_size34936-snap-gene-0.24-mRNA-1

ATGTTTTGGATAAATGCCCTGCTGCTGTTACGTGTGTATTACCAAAAACCGATGCCA  
CGTTCAACGAATGCGAGCGTACCGCTGTCCAAATCCTAAGTACCCTCATTTCGTAAGA  
ATGACCTCCTGGACAAGAATCAGCTGAAGATCAAAGGCGGCAGTCACAATCCCCAC  
AACAGCCCCGCTGTCAGCATCAGCAACATCCAGATCCACCCGAGATACAACAATTAC  
AATGCCGGAACACATTTGCAGCACGACATTGCGCTGCTCACTCTGGCGAAGGCGATA  
GAAATCGGCAACGAAAAAGTTGAATACATCAGTCTCCCGCCGCGGGGAAAAAGCT  
C

>maker-scaffold2048\_size23130-snap-gene-0.17-mRNA-1

ATGTTTTGGATAAATGCCCTGCTGCTGTTACGTGTGTATTACCAAAAACCGATGCCA  
CGTTCAACGAATGCGAGCGTACCGCTGTCCAAATCCTAAGTACCCTCATTTCGTAAGA  
ATGACCTCCTGGACAAGAATCAGCTGAAGATCAAAGGCGGCAGCCACAATCCCCAC  
AACAGCCCCGCTGTCAGCATCAGCAACATCCAGATCCACCCGAGATACAACAATTAC  
AATGCCGGAACACATTTGCAGCACGACATTGCGCTGCTCACTCTGGCGCAGGCGATA  
GAAATCGGCAACGAAAAAGTTGAATACATCAGTCTCCCGCCGCGAGGGAAAAAAT  
C

augustus\_masked-scaffold3315\_size18320-processed-gene-0.2-mRNA-1

ATGTTTTGGAGCAAGTTTGAATCGATGACGGCGAAGGAGTCCCTCGGTGCAGGATGTA  
CTTTTGGCCACGAAACTGAGAGCGTCACATTAGCTTCACTGTTGGAGAAAGAGGAC  
TGCATACAGGAGACAAAGGCCAGGAATCCGCAGCTTATCAAAGTGCTTGTTCGGAA  
GGATATTTTACTGGAGATGGTGAATTTGATCACAAGGAACCACCGGGAGAAGTGG  
ACGCCAAGAACCGTTTCAAGGATGCTACCGTGCATGCGAAATGCTGAACGCCGACG

TGCCGGAGATGACGGAAGCGCTGACACAGGGTCCGGAATATCTCGACTGCCTCCTGG  
ACATTTTCGACACCACGGAGACGCTCAATCCCATCCTTACTAGCTTTGTCACACGCAC  
CTTCGGTCTCTTGATAGCTCGTCGACCTAATGAAGTGCTGGAATATCTGAGTCGGAA  
GGAGGCCTTTCTGGACATGACTTTGAAGCACTTAAATGTGACCGCTGTCACTGATCTC  
TTCATCCGCCTCATCACTGCCATGAGAACGATGCTTTTCGGTATAAAATGTGTGAG  
augustus\_masked-scaffold3086\_size19020-processed-gene-0.0-mRNA-1

ATGTTTTGGAGCAAGTTTGAATCGATGACGGCGAAGGAGTCCTCGGTGCAGGATGTA  
CTTTTGGCCCACGAACTGAGAGCGTCACATTAGCTTCACTGTTGGAGAAAGAGGAC  
TGCATACAGGAGACAAAGGCCAGGAATCCGCAGCTTATCAAAGTGCTTGTTCGGAA  
GGATATTTTACTGGAGATGGTGAATTTGATCACCAAGGAACCACCGGGAGAAGTGG  
ACGCCAAGAACCGTTTCAAGGATGCTACCGTGTATGCGAAATGCTGAACGCAGACG  
TGCCGGAGATGACAGAAGCGCTGACACAGGGTCCGGAATATCTCGACTGCCTCCTGG  
ACATCTTCGACACCACGGAGACGCTCAATCCCATCCTTACTAGCTTTGTCACACGCAC  
CTTCGGTCTCTTGATAGCTCGTCGACCTAATGAAGTGCTGGAATATCTGAGTCGGAA  
GGAGGCCTTTCTGGACATGACTTTGAAGCACTTAAATGTGACCGCTGTCACTGATCTC  
TTCATCCGCCTCATCACTGCCATGAGAACGATGCTTTTCGGTATAAAATGTGTGAGG  
AGAAGATTGTTGCCTTCCTGGACGCGAGCAAGACGCCCGACTCAGACTATCACACA  
ATAGCGCCCAGTTGATTTGCGACATTATTCGCTTCTCCCGGGAGCAGCAGCTGCAGC  
AGCTCAAACCGGAAGACGACATCAACGCCCTCACACCGGAGACGTATGCCAACGAG  
CTTTTAAAAACGGCCGATAGTGAGGCCTTTATCGGACTGATTGTGAGCAACCTGATC  
AGGAGTGTCTCCAGTCAGTCTGCCATTGTGCAATGTTTAAACCGTGCTGGGTGCTCCTT  
TTGAATTCATTCCCGTAAAGTAA

augustus\_masked-scaffold795\_size35360-processed-gene-0.0-mRNA-1

ATGTTTTGGACATGTCTGGCCATCATCTTTATATGCCTGTGCAAGCCTTACGAATGCA  
TTCCGACTGAACCGGAAATCGGCAGCCCGTTGAACCGTCACATGAGCAACGTCGAAC  
GGATGGAAACGTTTCGGTTCGCCGTAAGTGGAAACATTTTGACGACACTGACGGCCTTT  
CATACTACGCGACGTAAGTTCGGTAGATCCGACAAGCCGCTTAAAACGAGCCACCGCAA  
CAGTTGACGACACAAGCTGTCTTCCACGCTCCTGCGGCAAATCACCACGCCCTTCG  
GCCTGTGGACTTCCTCTTGGTTTCGCAAGCAGAACATTGAGCCGTCCGTTTTTCATAT  
CAACGGCATCCCCGATCGCGGGCCACGAGTCTCTCCAGCAGCTCCACATGTCGCTA  
CGGGATGACAGGGGATAACGTACAGCATCGGTGCATATAACTGGAAAAAGTCAGG  
AATTTCTGAGCGGATATTTTGTGCAAAACGGATCGGTCTATCGAATTTACCTCTGCC  
GAAGCGGCTGGCGAAACGCTCAGCGGACCCGGAACATGGTCTCAGCACGCGGTGT  
ATAGGGTGCAGCGACGCATTTGTGGATGAAAAATCAAGGAAGACGAAGCTGCC  
ATAAAGCGGTTAAGGATGAAAATGGAAGAAAAACAGCCGCAGAGCCAGTGCCTAT  
CGACTTGGTCAAGGAGTGTCCGAACGAAACTGTCGTTTCGATCCTCTTCCGAGCGC  
TGCAAAAACAACCCGAAAGGAACCAACAATAATCAGGTGTCCGTGGCCCTGACTG  
AAGGCGCGGATCAGCCGACATTGGAAGTGGCGGTGTTTCTCGACCCAACAGCGTACC  
GAACCTTCTCCACGTACCTGCAGTCCGACAACGCGGTGTTTTCAGCTTCTGCTCTTATT  
CATTGACCAGGTGACTTAATTTTCACTTACCGACATTCGGTAACTCCCTGGACATC  
AAGCTTGTCTACCTGAATATTATGAAATCCACTCCGCCTAAAATTCGGTAGGCGCG  
GAAATCGAACCGACCCTCTCGGCTTTTCGGGGAGTACCAAAAAAGCCTCAATTCCATG  
GACGATTCCGGTATTCAATTGGGACCATGCTGTATTACTGACAGGAACCAACAGTAT  
CGCGACCGCACGGATTTTAGCGTAATGGGCATGTCGCGTATCGGTGCCATCTGCGAT  
CCGCTTTACAGTGCACCATCTCCGAGTTCGGAGCGACAAATCCAACAACCGACCC  
ATCCAGTCGTCGGCTTCTCAGCAGCTATATGGTGGCTCATGAAATCGGACACAGG  
CAAGACATTATTATTTACCGCCCGCAAATTTGAAAAGTTTTAAAGCTGCCTACTCTT  
TTGTCACAGCTCGGACTGCTACATGACGGAGACCTGA

>maker-scaffold10055\_size9012-snap-gene-0.6-mRNA-1

ATGTTTTGGACATGTCTGGCCATCATCTTTATATGCCTGTGCAAGCCTTACGAATGCA  
TTCCGACTGAACCGGAAATCGGCAGCCCGTTGAACCGTCACATGAGCAACGTCGAAC

GGATGGAAACGTTTCGGTTCGCCGTA CTGGAACCATTTTGACGACACTGACGGCCTTT  
CATACTACGCGACGTA CTCCGACAGCCGCTTAAAACGAGCCACCGCAA  
CAGTTGACGACACAAGCTGCCCTTCCACGCTCCTTCGGCAAATCACCACGCCCTTCG  
GCCTGCTGGACTTCTCTTGGTTTCGCAAGCAGAACATTGAGCCGTCCGTCTTTCATAT  
CAACGGCATCCCCGATCGCGGGCCACGAGCTCCTCCCAGCAGCTCCACATGTCGCTA  
CGGGATGACAGGGGATAACGTCACAGCATCGGTGCATATAACTGGAAAAAGTCAGG  
AATTTCTGAACGGATATTTTGTGCAAACGGATCGGTCTATCGAATTTACCTCTGCC  
GAAGCGGCTGGCGAAACGCTCAGCGGACCCGGAACATGGTCCTCAGCACGCGGTGT  
ATAGGGTGCACGCGACGCATTTGTGGATGAAAAATTCAAGGAAGACGAAGCTGCC  
ATAAAGCGGTTAAGGATGAAAATGGAAGAAAAACAGCCGCAGAGCCAGTGCCTAT  
CGACTTGGTCAAGGAGTGTCCGAACGGAAACTGTCGTTTCGATCCTCTTCCGAGCGC  
TGCAAAAACAACCCGAAAGGAACCAACAATAATCAGGTGTCCGTGGCCCTGACTG  
AAGGCGCGGATCAGCCGACATTGGAACCTGGCGGTGTTTCTCGACCCAACAGCGTACC  
GAACCTTCTCCACGTACCTGCAGTCCGACAACGCGGTGTTTACGCTTCTGCTCTTATT  
CATTGACCAGGTGACTTAATTTTTCACTTACCGACATTCCGGCAACTCCCTGGACATC  
AAGCTTGTCTACCTGAATATTATGAAATCCACTCCGCCTAAAATTCCGGTAGGCGCG  
GAAATCGAACCGACCCTCTCGGCTTTCGGGGAGTACCAAAAAAGCCTCAATTCCATG  
GACGATTCGGTATTCAATTGGGACCATGCTGTATTACTGACAGGAACTAAACAGTAT  
CGCGACCGCACGGATTTTAGCGTAATGGGCATGTCGCGTATCGGTGCCATCTGCGAT  
CCGCTTTACAGTGCAGCATCTCCGAGTTCGGAGCGACAAATTCCAACAACCGACCC  
ATCCAGTCGTCCGGCTTCTCAGCAGCTATATGGTGGCTCATGAAATCGGACACAGG  
CAAGGCATTATTATTTACCGCCC GCAAATTTGAAAAGTTTTAAAGCTGCCTACTCTT  
TTGTCACAGCCTCGGACTGCTACATGACGGAGACCTGA

augustus\_masked-scaffold1718\_size25164-processed-gene-0.1-mRNA-1

ATGTTTTGCCTCAATCAATTGAACACCGGTCTGAACCTCGACAGAGCAGCATTTCGGC  
CCTCCGATGTTTCGGGACGCTGATCCTCTCTGGCACTTCTTACCCTCTCACACCATG  
ACCTGAAAATTATTCCCATCCTTCTCAGAAGATTAGCCGTCTTTAAAGACAACAAT  
ATTTACATTCGATGAGACGACCTCAAAGTCCCTCAAGGACTGGATTGAGGAGGAAA  
AGATGCCATCGTTCCCTAAAATATCCGGTGGTAACTTTTACCAGTTGATCGCCTTGAA  
GAAGCCGATTGTCATTGCGGTGGTGGAGCAGATGCCGTTCCGTACACAATGGACGC  
TGCCGTGGAGAAGATCTACGACCACGTTGAAGAGATCGCCACCGGTCAACGCGAAA  
AATACCACGACAAATTAAGTCAATGTTTCTTTGGCTGCAGTTTTGGTTTTGTGGACGG  
AAATGAGATCGTCAACCATGTCTTCTCCGAGTGGATCGAGGTGCCGGCGGTGGTGGT  
TTACGATCCGGTACAGGAAACCTACTACATCTCCGCCGAGACCCCTCAGACGATAAC  
GACAGAGTCTCTGCAGAAATTCTTGGACGGGATTTTGGCTGGAGAAGTGCATGGTGC  
CGGTGGGAAGGGCTGGTTCCGTAAGGCCTACAAGTTCTTCTACTCCATTGCCGCATA  
CTTCTATAAAATGTTCTCAACGCAACCGATCCTGTATCAATTCTCCTTGGCTTGCCC  
CTGGGAATCCTAACAATCATTCTAGTCATGATGTACACAAACGACTGCACAGACAAC  
AAGGAGGAGGATGAAGGGGATGACGACAGTGCATGAGAAGGAGGAGTGA

>maker-scaffold16436\_size5344-augustus-gene-0.5-mRNA-1

ATGTTTTGCATGCTTCTTCGATGTAGGCTAGCAATGGATGCAAAGTCATCGGAGTACT  
CCTCTATGGCAAGTTCACCGCCCTCAGTGACACCGACAGTGAGAAGACGATCGAAA  
AGGGACGAGTCTACCGAAAGACGCTGCGGTTGACGTCTGATCAGATTA AACGCTAC  
CTCTCCAAATGGGTCTCAATGAGGCGGAGTTCTGCATTGTGACGAAGTACCAAGGCT  
CGGCCACCTGCAAGTGTAATATCTTTCTCTGGCGATATGACGACAAAATTGTCATCTC  
CGATATCGATGGTACAATCACGAAATCCGACGTTTTGGGCCACATTCTTCCCGTGGTC  
GGCTCGACTTGGGCTCAGGCTGGTGTGCGGGATTGTACAACCGAATCAACAACAAC  
GGCTATAAGTTCCTCTATCTCTCGTCGCGTGCAATTGGGCAGGCCAATTTACCCCGTG  
ACCACTTGCCTAGCATCATCCAGGAAAATGTGACGCTTCCGGATGGCCCGCTTCTAC  
TTTACCAAAGTCTCTTCTTCTAGCCTTCCATCAAGAGGTGATCGTCAAACGACCGGA  
AGAATTCAAAATCGCCTGCCTCAACGACATTCGAGGTCTTCTCCCGCCCGGCCGAA

CCCCTTCTTTGCCGCCTACGGCAACAAAGTCACCGACCTCATCGCCTACCGCACCGTT  
GGGGTGCCCAAAAATCGTATCTTACCATCAACTACCAGGGCCAGCTGAACCTGGAC  
GTGCTGCGTCAAGCGCAGTCCTCGTACTCCAGCAGTCCACCCTGGTGGACATGGTC  
TTCCCCCGCTCCGTGTGCTCCCCAGCCGCAACGAGCTCGTCTCCGAGCTGGAGTGTG  
CTGATGAGTTTGGCTCCTTTTCCTTCTGGAAGCAGCCGCTGCCGGACATTGAAAAGG  
CCTTCCTTCTTCTCCGCCGGACGATGAGCCGGTGAGCTCAAAGTCCGGAAAAGCCG  
CTAAGGCCAAAGCCGGTCGCACTTCTTCCCCCGTGAAGGATGATGCCGGCAAAG  
CTGCTCGCAACGCCGCCGCGACCATGGTCGTCCTCACACCGGACGTGGTGAAGAGCT  
TTAAAATTGCTAAAACGTTTCGCGGACAACAATGATCGCATCAACTACATGGACATTT  
CCGCGAGCGGGCAGTACGTCATCACCAGCTCCGAGGACGAGTCCATCCAACCTCTATG  
ACTCGGAAAAGGCTACCCTACACAAGACGCTACACAGCAAGAAGTATGGCGTGGAC  
CTGATCTCATTACACGGAATCAGAACACTGTATCCATGGCTCCACAAAAATCGAC  
GACACGCTGAGGCAATTAATCTGGTGGAGAATCGGTATATCCGCTATTTACGGGA  
CATAAAGAAAAGTCAGCAGTCTGAAAATGCACCCAAAAGAGGACGTCTTCCTGTC  
GGCCGCCCGTGACGGCTCCGTTGACTGTGGGACCTCCGCTCGCAAAACGCACAAGG  
CGTAATCTACTCCCCGGACGGCCTGTTGCCAGCTACGATCCCGATGGCATGGTCAT  
CGCGATCGGCTACGACTCGGCCGAGGTGAAGCTGTTTGATCTCAGAACCTTCGATAA  
GGCTCCATTTTTGGTGTGTCTGTACCGAAAATTGCCGAGGGAGAGTGGACGGATCT  
CAAGTTTAACCCCGACACTACGCAGATTCTGAGCGTCTCCGGGGACAGACTCTGCGT  
GTTGAACGGCGACGATGCCCATCCCGTCTCCTGCATGCGTTTCAATCCAAAGTTCATG  
TTTTTCGCCACGGCCACACCAAAACCGCCTTCTGGATACCGACGGTCACGGAGAAT  
CAGGAGGAAGAGAGCGGCGGACCACTTCCGCCACAACGACACTAAGAGCCTCTT  
TTGA

>maker-scaffold10979\_size8499-augustus-gene-0.2-mRNA-1

ATGTTTTGCATGAGATCTTGCTGGCAAGAGACGCCAGCGGAACGCTTGAAATTCGCT  
CAAGTTCGCAGCATCCTTCGACAATTGTCCAAAACCAATTCCTACGAGAAGTCCAAC  
ATCATCGACACCCTGATCGAACGTATGGAGCAGTACGCGCAGAATTTGGAGTCTCC  
GTGGACGAAAAGACGGAAGCTCTGACTGAGGAGAAAAAGAAGACGGACCAGCTGCT  
TACTCAATCTTACCTAAACCGATTGCGGAACAACCTGAAACGTGGCGAACCGGTGCT  
ACCTGAACTCTACGACAGTGTGACCATTTACTTCGGCGACATTGTGGAGTTCACTACT  
TTGTCGGCTTCCAGTTCGCCGACGGAAATTGTCACACTCATGAATGATCTATACTCCC  
AGTTCGATCAAATCATCGTGAATATGACGCTTACAAAGTGGAAACCATCGGGGACT  
GTTACGTCATCGTGTGCGGTCTGCCACGACGTAACGGACAGAAGCACGCCGGTAAA  
TCGCCCGTATGGCGCTACAGTTACGCAGCTCCATTTTGACCTTTAAGGTCCAGCATAT  
GCCGACCAAACAGCTCCAACCTGCGCATCGGCTTGAATTCAGTGAAGGTTCTTCTACA  
TTTTGAAATACGTATTCTCCTTCCAGCCATGAAAATTCAGCTAACACAAACCACAGA  
AAGCATCCTCCGATACCTCGGTTTCGTTCCACATGGAAATCCGCGGTGACGTGGACAT  
CAAGGGAAAGGGCCGAATGAACACATTCTGGCTGATCGGCGAGTCCAACCTCGGAC  
CGGGTGATGCGAAGATCTCGCCATCTCAGAGACCCCCGAGACGGTGGACAGCACG  
GCACCCAGTTCCCGCAGTCGATTGTCTGTGAAGTAA

snap\_masked-scaffold3655\_size17381-processed-gene-0.9-mRNA-1

ATGTTTTGCATAGAGATTTCGCTGTTTCCAATTGGAAGAGCGCGCTGTTTCCCTTGAAG  
AGTTTCTGTTTCCCTTGGAGGAGCTCCCTGTTTCTTGAAGAGTTCCTGTTTTTTGAT  
TTTGACTCTTTTTGCCCTTCCCTCCCATCCAGGTCGCCATCTCCTGAGCCCATCTACAA  
CCACGAGGGCAAACGGTTAAACACCCGCGACATGCGGACCCGCCGCAAGCTGGAGG  
ACGAACGTCACAAGCTGATCCAGCAGATGTTTCGAGCTGAATCCGGAGTACAAACCG  
CCTTCCGATTACAAGGCGCCTTTGGCGAAGTACACGGACAAGGTGGTCATCCCCCAG  
GACGACCATCCGGAGATCAACTTTGTCGGTCTCCTGATTGGGCCGCGTGGAAACACC  
CTCAAACAGCTGGAGAAGGACGTTGGGGGTTATTGTAATAATTATCCGCGGAAAG  
GGCTCGGTGAAGGAGGGCAAGTTGGGCCGCGGCAATCGTGATCCCTTACCGGGGGA  
GGATGAACCCCTGCATGCCTACATTACCGGACAGTCGCCGGAAGCGGTCCGAGGAG

CTGTTGATCGGATTAACGGATCCTGATGGAGGGGATCGAGGTACCGGAGCATCAG  
AACGACCTGCGGAAGCAGCAGCTGCGTGAGCTGGCCCTCCTCAACGGCACGCTGCGC  
GACGAGATGGGACCGCGCTGCAGCAACTGCGGCTCCACCGCGCATCGCACCTGGAA  
CTGTCCGGACAAGCCCAACATCACGCACAGCATCGTCTGTAACCGCTGCGGCGGCAC  
GGGCCACATTGCCAAGGACTGCAAAACCGATATGACCCAGCAGAGCGAAGCGGTCA  
CTGTCAACATGGACGACGAGCCCAAGCCAGCCGCTGTGCCACCAGCAATCCCCAGT  
TCGCCATGCCTCGACCGCAAGGCGGCAATCAGTCCTACCAGGCCGTGCCACCGATCG  
CCCAGTACGGCAATGCCCCGCCATCCCATCAGCCACAGCACCAACAGCAGAACAGCT  
ACCACCAGCCACAACAGCACAAATTATCAGCAGCAAAACAACAACACTATCAGCAGCAG  
CAGCATCAGCAGAACAGCTACATGCAACAGCAACATGTTCGGCTATGGGAATCCTCCA  
CCACCGCCTCCCCCGTCCAACGGTGGTGCAACAGCTGCCGCCACCAATGGCTCATCC  
TCTGGGCACATGCAGCAGCTGCAGCAGCAGGCACAGGCCAGTACGGCGGATACTA  
TGGAGCCCCACCGCCGCCTCCTCCGGCTCCGGCTGTCCAGTCTATGGCTATGGTGG  
GTATGGTATGCAAGCGGCACCTCCTCCACCGCCGCCCGCAGTGGGGTAGCGTGT  
TCAGCCGCAGCAGAACAGCAGCCACCGGTGTTTGGAGGACTTCTTCCGCCACCGCC  
ACCGCCGGCTTCGACCTACCCCTCATCATCCGCTTCATCGTCGGCGTCTGCGGGCGTG  
CCGGTGAACGCATTTGCCGGGATGGCATCGTGGACGACCTTGCCCCGCCCCCGCCG  
CCACCACCACCACCGTCGTAG

*Niastella koreensis* coding sequences used for codon usage calculations

>1

ATGGGCGCGATAAAGACCTTTACTTTCCACACATAGCCAGCTCTTTTCAGTGCCTG  
ATACCAATAAGGAATATCTCTTTGTGGAAGCTGGTAAACATCCTTACTATGCAGAGC  
CTTACCGTGCCGAGAGTTATGCCATCGTATTTATAAAAAGAAGGCGGGGTAAGGCTGA  
ATGTCGGGCTCTCTGCAATGGATGTGGATGCGCCGGCCATGATTACCCTTGGCCCTTC  
AGTTATCCGTTTTTTTACCAAACGTACCGACCTGCTGAAGATGGATGTTATTTTTTTC  
AAGGATACCTTTTTTGCTGGAGCATCATGTGGACCCATTATTCCTTACGAAGTTGACT  
TTTTTGAAAACAATGAACGTCCCACCTTACTGCTCAAAGAACCATTCTCACCAAAT  
ACAGCAAAATATTTGACCTGTTCAACTAACACAAACCCTTCAGATTTTCACCAGC  
CACAGATCATCCGGGCTACATTTTTGCTTTGATCTATGAAATCGATGGCTATTACCG  
CCAGCATGCCAGTGCCGAACCTGCTGTGCAAAATGCACATCCTTTGTTACAAAATT  
CAGGCAGTTGCTCAGGCGGCATTACATGCAGGAGCACAAACTCGATTTTTATGCCGG  
CCAGTTGCATCTTACGCCCAAGTCATTGTCGGCAGCTATTA AAAAGTACACGGGAAA  
ACCGGCGGGTAAATGGATCGATGACGCCGTAATACTGGAAGCAAAGGTTTTACTGCA  
GAACAAAGCGCTTACCGTATCGCAGGTTAGTGAAATGCTGAATTTCTCCGACCAGTC  
TGTTTTTGAAAATTCTTCCGGGCAAATGCCGGTATGACGCCCGTAGAATACCGCAA  
AAAGTTTATTTGA

>2

ATGTGTTCTACAAAAACATCGGCAGCAAGTGCCGGTCGTCGATTACAGCTTTCAGG  
CTGATCGTATTAATATTTATGACGGCTATCGCCAGGCGCAACCTGTTGATGGCAAT  
ACCTACAAACTCACGCTTGCCGAAGCGGTACAGTTTGCAAAAACCTCAGAACAACTG  
GTACAGGCGGCGTGTATGGAAGAAAGCGCTGCAGAAGAAGATCGAAAAGACGCGTA  
CAACGCAGCACTGCCC GCCATTACCGCAAACGGTTCTTACCAACGCTTTACAGACCT  
TACTTTATTTACACATGGGCTCAGTCATTCAACTACAGGGCCCCGGAAACCAACACC  
CAATGGCGCCACCCTGGGAGTTGACGCCTTATTTAATATTTATAGTGGCGGCAAACA  
GCGGGCGTTGCAAAGCGAACAACGGTCCAAATTACA ACTGGCCAGGCTGAATGCCA  
TGGACCAGTCTGGCAATGTAGCGTTACAAACGGCGCATCAGTACCTGGAGCTGTTGC  
GATTGAACGATCTGCAAAAAGCTCATCCTTGACCAGCTTAACCGGGCGCAAACGCGGT  
TGAATAATATCAACACCCTGTATAAAAACCAGAAGGTTACCAAAGCGATGTGCTGC  
GGGCTGAAGTGTTGCTGTCCAATGTGCAATTGTCGTTACAGGAAAATGAGAACGACC  
TTACCATACCAATCAGAAACTGGATGTTTTTATTGAATGTCCCTGATACCGTACAAAT  
ATCACCGGTAGATTCGGCTGCTATGCCAAAGCCTGCTGTCAGCGCCCTGCTGCCATTT  
GTTGAAGCGGCAGGTGTTACGAATTACAGTGTGCAAAAAGGCTACAGAAAGCATTGA  
ACTGCAAAAAGGCCCGGTTGAAAGGAATAGAAAGCAGTAATAAACCAAGCATAGGTT  
TTTATACGGCGTATGGGTTGAATTATCCCAATTATTTATTCTTTCCGCCGGTTAACCA  
GGCGTATGCCATTGGCTTCGTGGGGTTGAAAGCACAGTACAGTATTTCTCGCTCTAC  
CATAACAAAAGCAA ACTGGCCGCGGGCAA ACTTCGGGTAAAGGAACTGGAAGTGCA  
GCAGCAGGCCTACAATGATAATGTGCGAACGGAAGCCATTCTGGTATATAAAAATA  
TGCGGAGGCGCTTACCAGGATAGAGGTTAATGAGCGCTCGGTTGAACAGGCGCAGG



TAAACTACCGGATCGTAAATACAAAATATTTAAACCAGTTGTCGTTGTTGACCGATC  
TGCTGGATGCGGATAATTTGTACCAGGAATCGAGGTTTAATTTAATTAAGCGCAA  
CCAACGCCCTGAACATTTACTACAGCATCCTTTACATCAGCGGAAATTTATAA

>3

ATGGAACGTAACGAAAAATACATCCGGGCAATATTGTACTIONACAATAATTGCC  
GGAGTAATAATACTGGCGGGAGCCGTATGGCTTATCAGGTACTIONGGCGCTACAGCACG  
CATTATGAAGAAACAAATGATGCCAGGTAGAAATCCTACATAAACCCGGTGAGTGC  
AAGAGCAGGAGGCTATATCCAGCGGGTTTGTTTAACGAACATCAACTGGTGAAACA  
GGGCGATACGCTGGTAATACTGGACGATAGAGAATATCGGGCCCAGTTACAGGTGG  
CCGAGGCGGCCATGGAAGATGCTGGTTCGCAACTAACGGTGCTGGCTGCCAGTATTC  
ATGCAGCGGAAACCGGCACCCGGGTAAATGAAGACCAGATAAAAGGTGCGCAGGCA  
AGATATGTGCAGCAGCAACAGGATATCAACCGCTACACCAACCTGGTGAAAGAAGA  
AGCTGCAACAGGCGCAGAGCTGGAACAAATAAAGGCCCGGTACGATGTGGCGGAAA  
GTGATTACAGCGCTGCTCAAAATGGCCTGAAGACCAACCTGGCGCGCATTGCAGAAC  
TGAAAACGCATTTTGCCTTATTGCAATCTGATATAAAGCGAAAACAGGCGGCATTGG  
AACTGGCGAAGCTGAATTTATCGTATACCGTTATCCGCGCGCCTTATGCCGGCCGTT  
GGGACGCAAAAATATCCTGGAAGGCCAGCAGATAACAACAGGCCAACCCCTGGTAA  
GCATAATCAACGAAGGCCGAGAAATGGATCACGGCGAATTATAAAGAAACACAGGTG  
GATGGGATGTATGTTGGCCAGCCAGTGGAGATCCGGATCGATGCGATAGCCGGACG  
GGTATTTAATGGCAGGATTTCCGGCTATCGCTGGCTCCACCGGCGCGGTTTTTCGTTG  
CTGCCACCCGATAACTCCACCGGCAATTTTGTAAGATCATTACAGCGGGTACCGGTT  
AAAATTGAGTTTCTGGGCAGGGACGCGGAAAGTGTACTCCCGGGGATGAATGTAATC  
GTTGCTGTAAAAAAAGAGCGTAA

>4

ATGAACAACCAGTTACCGGATATTATTTCAAAAACCTGAAGGTGGTGTTTTGTGGC  
ATCAACCCCGGACTTACTTCTGCTATGCAGGGGCATCATTTTCCAATCGCAGCAACA  
GGTTCTGGCGGGTATTGCACCAGGCAGGTTTTACCCCGTATGAAATAGAACCCCGGT  
TCGATATGGCTATTCTGACTTATGGTTATGGGTTAACTACCGCTGTATCGCGCCCAAC  
TGTGCGGGCAGATGAATTATCGAAAGAAGAGTTTCATGCGTCCATTGAATCATTAA  
ACAAAAGATAGAGAAATATAAACCTGCCCGTTTAGCATTCTGGGAAAGCCGGCCTG  
GCTGGCTTTCTCGGGATTAAAAACGGTGGAAATGGGGATTGCAGCAGGAAAAGTTTTG  
CGGGGCTGTGGTGTGGGTGTTGCCAAACCCAAGCGGATTGAACCGGAGCTTCGCTTT  
GCAATCGCTGGTGGTTCATTACCAGGAATTGCTGAATAGTATACCAGTATTAATCA  
ACATAATCATGGAACGCTTAACATATCTTAA

>5

ATGGAACGCTTAACATATCTTAATAACGGGAATGCAGCGTACATCAATTCGCTCTAC  
GAAGCGTATCAGCATGATCCCGGATCGATAGAGTTCGGCTGGCAGAAATCTTTGAA  
GGATTTGATTTTGGCGCCGACCAGGACAGTGAACCTGTTTCCAATGGTACTGCTGCT  
ATGCTTGCCAAAGAGATCAATGTGCTGAATATGATCGACGGTACCGCAGGAGAGG  
GCACCTGTTTGCAAAGACAAACCCGGTCAGGGAACGGCGCAGTTTTTACCGGGAAA

GGAGTTGGCGTCTTTTGGTTTGAACGATGCGGATCTTGATAACCGTTTTTAAAGCCGGG  
GAGGAAGTGGGTTTAGGCCCGGCTACGCTGCGCGACATCCGGCAGTTGCTGGAAGA  
AACGTATTGCGGCCCATTTGGAGTTGAATATAAATATACCGGCAATGCCGGTAAACA  
CAAATGGTTCCAGGATAACCTGGAACTGTGAGGGGCAGGCCTGTATTTTCTACCGA  
AGAGAAAAACGCATGCTCCAAAAATTAACCCAGGCAGTGGTGTGTTGAATCTTTTCT  
GCAAACCAAATTCCTGGGACAAAAACGTTTTTCATTGGAAGGCGGAGAGATCCTGAT  
CCCGGCGCTGGACCTGTTGATTGAAAAAGGCGCGGGTATGGGGGTGAAAGAATTTGT  
TATCGGTATGGGCCACCGCGGCCGGTTAAACGTACTGGCAAATATCATGGGCAAGCC  
CTATAAAGAGATCTTTGAAGAGTTTCAGGGAAAAACGGTGAAGCATGACGATGGTTT  
CAGCGGTGATGTTAAATATCATTTAGGTTATTCAAACGATGTGACTACCGCAGGCGG  
AAAACCAGTACACCTGAGCGTATGCGCCAATCCCTCACACCTGGAAGCGGTGAATGG  
AGTGGTGAAGGCATCACGCGCTCGAAGGCAGATTTCAAATACAGCGGTGATTATGC  
TAAAATAGTACCCATTCTGTTGCACGGTGAATCTTCCATTGCCGGGCAGGGAATCGT  
ATATGAAGTGTTACAAATGGAAAAGCTGGATGGGTACCGCACCGGCGGCACCATTC  
ACATTGTGATCAACAACCAGGTAGGATTTACAACCGATTATAAAGACGCGCGCTCCA  
GTACGTATTGTACAGACCTGGCAAAGATCGTGTCTGCACCGGTTTTTTCATGTTAATGG  
TGACGATGCGGAAGCTTTGGGCTATGTAATGGGGTTGGCTATCGATTACCGGCAGGC  
TTTTTCAGGGTGAATTTTTATCGATCTTTTGTGTTACCGGAAGTATGGGCATAACGAA  
TCAGACGAACCGAGATTTACCCAGCCCTTATTGTATAAATCTATCGATAGCCACCCA  
AATCCCAAAGAGATCTATGCACAAAACTGGTTGCATCGAACACCATTTCAGAAAGA  
GTATGTTTTGGAAATGGAGACTTCTTTTCAGAAATGAACTACAGACGTTTTTTAGATGA  
AGCGAAAACCCTGGAAAACATTGAAGTGACCAGACCCCTGTACCAGAGCGCCTGGC  
AGGGTTTGCGCAAGGCGAATGGAACGGAATTGGAAATAATTGATACAGCTGTGCCG  
GAGGAAATGATTGAGGAGATAGGAAATGGGATCACTACGCTGCCAGCCGGTAAAC  
TTTTTTAAAGAAGATAGAGAAGTTGTTTGAAGGCCGCAGAAAAATGGTACAGGAAA  
CAAAGTATTCGATTGGGCAATGGGCGAGTTGTTGGCATATGGTTCCTTATTGAAAG  
AAGGCTACCCCGTGCGGGTAAGTGGCGAAGATGTAAAGCGGGGTACTTTTTACACC  
GGCATGCAACAGCCGCGATCATTGATACGGGTGAAGAATATGTACCGCTCAATAATA  
TTGGCGCTCAGGCAACATTCAGTATTTACAATCCCTGTTATCGGAATACGGCGTACT  
GGGTTTTGAATATGGTTATGCATCTGCCAACCCCAACGCGCTGGTAGTATGGGAAGC  
CCAATATGGTGATTTTTTAAATACGGGTCAGGTAATTGTAGACCAGTATGTGGCCAG  
CGCAGAAGCAAAATGGCAATTAGGAAATGGCCTGGTGTGCTGCTGCCGCATGGCT  
ATGAAGGTGCAGGCCCGGAACATACTTCTGCCCGCATTGAGCGCTTTTTAGCCCAGT  
GCGCAAATAACAATATGCAATTGGTGAACGTACAACCCCTGCCAATTTCTTTCATGT  
AGTGCCTCGCCAGTTGCACCGCGATTTTCGCATCCCGCTGATAGTATTCGCGCCGAA  
AAGTTTGTGCGGCATCCATTATGCGTATCACCGCTGAATGAATTTACGCAGGGGCA  
TTTCCGGGATCTGATCGACGATGTCAGTGCAAACAGCCCGGAAGTAAAGCGGGTATT  
GTTTTGTAGTGGTAAGATCTATTACGACCTGTATCAAAGGCAACAGGAAAATAAGCG  
TACAGATGTGGCGATTGTACGGATAGAACAATTATATCCTACGCCGTTTGATGAGAT  
GCAACAGATCAAAGCGAAATATGCATCAGCAACGGAATTTATCTGGGTGCAGGAAG

AACCGGAAAATATGGGCGCCTGGCCTTACCTGTGCCGCAAATTTTGCAACAACAAAA  
TAAACCTTCAAATTATTGCCCAGCCGGAAGCAAGCAGTCCGGCAACAGGTTTCTCCA  
GGCAACACGCCGCAGAGCAAATGGAAATTGTAAACCGGGCGTTTGAATAA

>6

ATGAAAACAGAAATGATGGCAGCGCCAAAAGAACCCAAACAGATCTTAGGGTCCGT  
TGCTGTTTTGGAAGCCTTGATTGCCGAGGAGGTAAGTGGTGTGGGGTGCCGGG  
TGGGGCCAATATTGCGATCTATGATGCATTATACGATTATGAACAACAACACTGAAGCA  
TATCCTGGTACGTCATGAGCAGGGTGGCATTACGCGGCCAGGGTTACGCACGCAC  
ATCAGGCAGGGTAGGGGTGGTGTTCGCCACCAGCGGGGCCGCGCCACTAACCTGTT  
AACCGGGGTGGCCGATGCTATGATAGACAGTACACCCGTTGTTTGTATCACCGGACA  
GGTATACGCGCACCTGCTGGGTTCAGATGCATTCCAGGAAACGGATATCATCAATAT  
GTCTACGTCCATAACCAAGTGGAACTACCAGGTCACCGATGCAAAAAGAGATCCCGGC  
AGTACTGGCAAAGGCGTTTTACATTGCCCGCAGTGGCCGTCCCGGCCCGTGTGAT  
TGATATTACCAAGAACGCGCAATTGCAGTTGTTGATTATCCCGGCTATACTAAATGC  
GACCGTATTCGAAGTTACCGGCCGGCGCCTGCCATTCGCCCCGCCTATCTGGCAAAG  
GCAGCGGAATTGATAAACAGCGCCAAAAGCCATTGGTTATTTTTGGTCAGGGCGTA  
ATATTAGGCGGCGCTGAGCAGGAGTTAAAGCATTATTTGAAAAGAGTGGCATTCCG  
GCTGCCTGGACGGTACTGGGTGCAGGCGCCCTCCCATCAGACCATGCATTGAATGCA  
GGCATGCTGGGCATGCATGGAAATTACGCGCCTAATGTACTCACCAATGAATGCGAT  
CTGCTGATTGCTGTTGGGATGCGCTTCGACGACCGCGTTACCGGGCGTTTAGACAGG  
TATGCCAAACAGGCCAGGTAATTCATCTGGATATTGATCCAGCTGAAGTGGACAAA  
AATGTAAAAGCCACGGTGCCGTTTTGGGGCGATTGTAAAGAAACATTGCCATTGCTT  
ACCGCATTGACCGATAAAAAAGAACATACAGCCTGGCTGCAGCAATTTCAATCCCTG  
TACAAACAGGAATTTGAAACCGTGATCCATCCCGAGTTACATCCTGCAGGGGAGGAA  
TTGACCATGGGTGAAGTGGTACGGATGCTGAATGAATATACAAACGGCGATGCCATC  
ATTGTTTCTGATGTGGGACAAAATCAAATGGTGGCCACCCGGTATGCAAAACTGAAT  
CATACCCGCAGCAATGTAACCAGTGGAGGATTGGGAACCATGGGGTTTGCATTACCC  
GCTGCAGTAGGCGCAAATATGGCGCTCCGGATAGAACGGTAATCGCCATTATTGGC  
GATGGTGGATTTCAAATGAACCTGCAGGAGTTAGGAACCATCATGCAAAAATAACCTC  
GACATCAAATAATTATTCTGAACAACCGGTTTTTAGGAATGGTGCCTCAATGGCAG  
GAGTTGTTACGCGATAAACGGTATGCTTCTGTGGACCTGGAAAACCCCGATTTTGTA  
GCATTGGCCGCGCTTATCGCATTGCGGGAAAATGTGTTGCCAAACGGGATTACCTG  
GAGGAAGCGATAAAGGAGATGTTACGCCACAAAGGACCTTATTTATTGGAAATAAT  
GGTGGCAAAGAAGGAAATGTGTTTCCCATGGTGCCGCAGGGATGTGGCATAAGTG  
AAATAAGGCTTAAATAG

>7

ATGAATGTTGCAATTGGTAAGTATTACCGTTGGAAGAAGCTTAGACTCCAGACAGGA  
ATGCTGCTGTTTTTTTTGATGGTTATGACCGGGCTGCGGGCCCAACAAAATGACCTTA  
CTTATTACCTGGACAATGCAGTCAGAAACAGTCCCCTCATCAAAGACTTTCAAACCC  
AGGTACTGGCGTTCTCCATTGACAGTCAACTGGTAAGGGCTAACCTAAGGCCCCAGG

TAAGCGCTAATAGCAATAACATGTATGCGCCCATTATTAATGGCTATGGTTATGATC  
AGGCTATAACAAACCAGGCCAGGTATCGGGTATGGTTACGGTAAATAAAGCGTTTA  
TAAGCCGCAGGAATGTGAATACCCAGATCGCCGGTTTTTCAGATCCAGTCACAATCGG  
CGGCCAACAAATATAAAGTTGTCTGAACAGGATATTA AAAAGAGTGTTACCGATCAAT  
ACCTCAATACATTTGGTGACTACCTGCAACTGCAGTACAACCGCGAAATAAACGACC  
TGTGTCCCGCGAAGATACCCTGCTGAAAAAGCTCACCCAGGGGAATGTATTTAAAC  
AATCCGATTATCTCTCATTTACCGTAACGCGGCAGCAGCAATTACTTACTACGTCCGA  
ACTGGAAGTGCAGTATGCCAGTACTATGCGCTGTTGAATTACCTGGCAGGCATCCA  
GGATACCACAACACCCCAACTGGAAGACCCGAACTATCGCTGAATACTTTACC  
GGAGTACACTACATCTGCTTTTTACCGGCAATACATCCTGGACAGTTTTAAAATCAG  
GAACGACCGGGCGCTGGTTGATCTGAATTACAGACCAAAGATCAATTCCTTTGCCGA  
CGCAGGGTATAATTCATCCATGACCTATATGCCATACAAAACTGGGGCACCAGTTT  
TGGCGTTTCGCTCACAGTACCTATTTACGATGGTCATCAACGAAAATTGCAATACCA  
GAAGTTAAACCTGGCCGAACAAACCCGGCAGGCACAACGGGATTTTTTTGTGAACCA  
GCGGCAACAACAGTTATTCCAGTTAATGCAGCAGCTGCGTAACACCGAAAAGCTTAT  
CAATAATATCAACCAGCAAATACGCTATACCGATACCCTGATAAAAGTGAATGAAA  
AATTGTTGGCTACCGGCGATATAAGAGTAACCGATTTTATTCTGGCGCTTACCAATTA  
TTTCAATGCGCGGAACCTGGTTACGCAGAATTACATCAACCGGCTGAAAATTATAAA  
CCAAATTAATTACTGGAACAGATAA

>8

ATGAGATCAGGAACATATATATTAATAATGATCGTTTTGGTTTTCTGCGGGCATAAA  
GCCGCTGATGAGAGCAGCGATTCCCCGAAGTGGTTACGCCCGTAACGATTACAACG  
GTGCATACGGGCCTTATGGCAGATACTATTACAATGAATGCCACCTCTACCTTTTTAC  
AAAAAAGCATCGTGAAGGCAAGCTCTAACGGCTATCTTACTACGGTGAATGCGGTAG  
TGGGGCGAACGGCCGGGAATGGCGAAGTGTGTTTCGTGCTAAAAACAAAAGAGGCA  
CAAAGTATAGGCAATACCATCAATTCGTTGGATTCTACTTTTAAATTCTCGGGTCTTA  
TAACCATCAGGGCGGCCAGAACCGTCAATACC GAAGTTAACCACCAGGTGGGTG  
ATTATGTACAGGATGGTGAACAGCTGGCGGTGATCAATGATGTGAACAGTTTTGTGT  
TTGTGCTGAACCTGCCGTATGAGCTACGGCCGTACGTGTTGGGTAAAAAAGATGTAC  
AGTTAAAACCTGCCGATGGGCAAAAACCTGGCAGGCACCATTACTGCCGTAACCTGCCA  
CTGTTGACTCGGCCACCCAAACCCAGAATGTTTATATAAAAAGTGCCTTCCAATCAGTT  
GCCGGTAAACCTGGTGGCCAAAGTAGACATTGTAAAAACGGCCAAAACAATGCGA  
TCTTTTTACCCAAACAAGCAGTATTGGCGAATGAAACGCAAACGGGGTTCTGGGTAA  
TGAAAGTAGTAAATGATTCTACAGCAGTGAAGGTGCCGGTAACAAAAGGACTGGAG  
ACCAATGGACAGGTAGAAATTGTTTCGCCCACTTTTACGGGCAACGATCAGTTTGTA  
CTAACCGGCAATTATGGGTTGACGGATACCGCCACCATTACAATTGTAAAGCAATAA

>9

GTGAACAACCTTCTTTCTCACACATAAGAACCCGCTTACTGTATTACTCGTCCTGATCC  
TGGGCGGCGGCATTTTTGTATATACGAAACTGCAAACCTCGCTTTTCCCGGAAATCA  
CTTTCCCAAGATAAAAGTAATTGCCGATGCCGGTTTACAGCCCGTTAATAAAATGA

TGGTCACTGTAACCAAACCATTGGAAGCGGCCATTAAACAGGTACCCGATCTGCAA  
TGATCCGGAGCACCACCAGCCGGGGTAGTTGTGAGATCTCGGCATTCATGGACTGGA  
ATGCAAATATCGATCTGAGCCAGCAGCGTATTGAATCAAGAATTGCAGAGATCCGGA  
ATCAGTTACCGCCCGAAGTGCAGATAAGTGTGGCCCGGATGAACCCATCCATTTTAC  
CGGTAATGGGGTATTCGCTTGAAAGCAATACGAAGTCGCCCATAGAATTA AAACTGA  
TTGCCAACTTCACGGTAAAGCCATTCTGTTCGCAGGTGGCAGGTGTATCGGAAATAA  
GAATAACCGGCGGGAAATCAAAGAGTACTGGCTTCAATTGAACGTGCAAAAAATG  
GGCACCTTTTCAGTAACGCCCGAAATGGTGAATACGGCGTTGGGGCAAACCACTTT  
ATAAAATCAAACGGGTATTTGTCTGACTACCACTTTTTGTACCTCACCGTAACCGATG  
CCACCGTACAAAATAAAGATGAACTGGAGAATATTGTAATAAAGAACGATGGCAAG  
CGGGTGGTAACCATTAAGATGTTGCCGATGTGCAGATAAACGAAGGCGTGGAGTA  
TGTAAGATCAATGCCAATGGCCGCGATGGCGTACTGGTGGCGGTGATAAAACAGC  
CCAATGCCAACCTGGTAACGCTGTCTACAGCCATGGAAAAAAGATCGCTGAATTAA  
AAAAGATCCTGCCGCCCGATGTTCCGATTGTTCCCTATTACATCCAGGCCGATTTTGT  
AATGACTCCATTAAGCGTAACCGATAGTTTGTGGATCGGATTGTTACTGGCTAT  
TGTAGTAGCCATTATTTTCTGCGTTCGTTAAAGGCAAGCGTTACGCTGTTGTTACC  
ATTCCATTACGCTGGCGCTTACGCTGATTGTGCTGTATGCAGTGGGGTATACGTTA  
ATATCATGACGCTGGGCGCTATTGCCGCGGCCATCGGTTTAATCATTGACGATGCTAT  
TGTAGTGGTGGAGCAGATTCACCGCACCCATGAGGAGCATCCGGACGAACCCAGTA  
ATGCGCTGGTGCAAAAAGCCATCCATTACCTGTTCCCGGCCATGCTGGGCTCGTCCA  
TAAGCACCATAGTAATATTCATTCCCTTTTTATTAATGAGCGGGGTGGCTGGCGCCTA  
TTTCAGCGTTATGACCAATACCATGATCATAACCCTGGTGTGTTCCTTTTTTGTTACCT  
GGATTGGTTTACCGGTGGTTTACCTGTTGCTTACCAAAGACAAGCCGCGGCAGGGAC  
AACAGGCGGCTGCCATAATGTAAGAACACAGGGCTGGGTAGCTTTTTTTATAAAAC  
GCCCCGTATATCAGTTTGGCCTTTGTAGTGGCATTGGCGGTTTTGATTGCATTACTGGT  
GCCCCGTTTGGAAACCGGCTTTTACCTGAAATGGATGAAGGAAGTATTGTATTGGA  
TTATAACTCGCCGCCAGGCACATCCCTGGAGGAAACGGATCGCGAATTGCACGAGGT  
AGAAAAGATCCTGAAGACGATCCCGGAAGTACAGGCGTATTCAAGAAGAACGGGTA  
CGAAATGGGCTTTTTTACCGAACCTAACCGGGGAGATTACCTGATCCAGCTTA  
AAAAAAGCAGGAAGCGAACACGGAAGAGGTGATCACAGATATTCGTCAACACATA  
GAGAGCTCGCAGCCTGCCTTACGGGTTGATTTCCGACAGGTGATCGGCGATATGCTG  
GGCGATCTGATGACCTCTGTTACGCAATAGAAATAAAGATCTATGGGAACGATCAA  
AAAACATTGCAGCAGTTAAGTAAACAGGTGGCGGAGGTAGTTACCAATGTTTCCGGT  
ACCGCCGATGTATTCAATGGCGTAGTTATTGCCGGGCCCTCGGTAAGCGTGCAGCCC  
GATTATACAAAGCTGGCGCAGTTTGGCGTAACCCCGGCCAGTTTACAGTACCAGTTG  
CAAACGTCACTGGAAGGCAATATCTCAGGAAATTTATTTGAGCAGCAGCAATATGTT  
CCCATCCGGCTGGTGTATCCCGGCAACCGGAAAATGAGCGTAAACGACATCAACGA  
CCTGAAAGTATTTTTGCCCGATGGCCGGTTAAAACCTATTACCGCGCTGGCTAAAGT  
AACCGTAAATGCCGGTGTATGCCGAAATTGAACGGGAAAATTTGCAATCGATGGGCG  
TAGTAACTGCCCGCCTCGAAAACCGCGACCTGGGCAGTGTAATGAAAGATATACAGC

AAAACTATCCACTGATGTTCACTTGCCCCAATCATAACAGCATTCAATATGGCGGCG  
CTTATGCCGATCAGCAGCAATCGTTCAAAGAACTGTTGATGATATTGATAACGGCCA  
GCCTGCTGGTGTGTTGCGGTGATCCTGTTCTGTACAGAGACTTTAGCATTGCTTTGCT  
TATTTTAGGAATTGCCGTGCTGGGTATTTACAGGCAGTTACCTGGCGCTGTTCCCTACC  
GGTACCCCATTAACGTGGGCAGCTATACCGGCCTTATAATGATCACCGGTATCATT  
GGGAGAACTCCGTATTTACCTTTTTGCAGTTCAGGGAATCGTTACACGAGAAAGGG  
ACTGATGATGCCATTATCTATTCCATTTCAACCCGGCTGCGCCCTAAGTTAATGACCG  
CATTGGGCGCCATCATTGCCTTAATGCCATTGGCATTGGGTATTGGTACAGGCGCGC  
AACTGCACCAGCCACTGGCTATTGCCGTAATTGGCGGGTTTATAATGGCGTTGCCGTT  
GTTGCTGATCGTATTACCAACAGGGATCAGGATGATCTATAAAAATAAACTACCAC  
ACCATAA

>10

ATGGCGAATCACAAAAAATCAGGGCGCTTGTATTAGTCTTACTTCCACTGGTAATA  
TATGCCCGGCAGCAACCGGGCTTTTCTGTATCCGGAACCATAAAGGATAAAAAGTCG  
GGAGAAACCTTAAGCGGCGCCAGTGTGCCTTTCTGCAAAAGGCCGGGTGGGTGTT  
GTAACAAACGCTTATGGCTTTTATTCCATCACATTACCCAAAGGGCATTACACCATG  
GTTATCTTTTTTCAGGTTATGCAACGATACTATTGAGTTGGACCTGCAACATAATA  
TGACCGTAAGCAGAAGCCTGGGTACAGGCAATGGTCAATTGCAGGAGGTAGTGGTG  
GCCGGCAAAAAGGCCACTAATATCTTAAAACGCCACCTGGTTTACAGCGCCTTTCG  
ATTGAAGAAATTAATAATGTACCGGTATTGCTGGGAGAAAAGGATATCTTAAAAC  
CATTGAGTTATTACCCGGTGTAAAGTCGGCGGGCGATGGGAAATCCGGTTTTTATGTA  
AGAGGTGGAGGAGCCGACCAGAATTTAATCTTACTCGACGAAGCACCCGTATACAAT  
GCCTCGCATTATTAGGTTTTTTTTTCGGTATTCAATGCAGATGCTATCAAAGATGTAT  
CTATCTATAAGGGTGGCATGCCGGCCGCTTATGGCGGGCGGTGGCTTACAGTGGAAG  
ATATTAATAATGAAGGATGGCAATAATCAAAAATTTTCAGGCAGTGGTGGCATTGGCC  
TGATCGCTTACGACTTAACCTGGAGGGACCCATTGTAAGATAAAGGCTCATTCA  
CCGTCAGCGGCAGAAGGACCTATGTAGATGTTTTTACGGGTTTGTCAAGTGATACCA  
ATATCAGTGGAAGTAAATTATTTTCTACGACCTGAATATGAAAGCCAACCTACCGGC  
TTGGGAAAAATGACAGGGTATTTTTATCGGGTATTTTGGCAAGGACGTTTTATCGGT  
AAAACACAATGGAGGCGTTGACTGGGGTAATTCTACCGCTACCATGCGCTGGAACCA  
TTTGTTTAACGATAAGCTGTTTTCAAACACTTCTCTTATTTACAGTCAGTATAATTAC  
AATACCCAGTTCACCAGCAACAATAATAATGTGCGGGTACTTCCAGTATTACTGAC  
TATCAGTTAAAACAGGATTTCAATTATTTTTTAAATCCCCGGAACAAATTTGATGTTG  
GTTTTAATTTTATTTATCATATTACCCAGCCCGGACAGGCCCGCTCTGACCAGGCTTC  
CAAGTACAACGATATTACGCTTGAAAAAAGTATGCACTCGAAAACGCCGTATATGC  
TTCGCACGAATGGAGTGCTACCGGCAAATAAAAATAATGTATGGTATCCGGCTTAG  
TGTCTTACTATTTTAGGACCTGGAAACGTGTATACATATGATAATGCGGGTAATATC  
CTAACCACTACCTGGTATGATCGTGGTAAAACGGTAAAACATATGTAAACCCCGAA  
CCGCGTTTGGCGGTCACCTTATCAGTTGAATGATATCAGTTCTGTAAAGGTTGCGTATG  
ATCGTAGTGACAGAACATTCCTTGTAAATAATTCAACGTCTAACAGCCCAACCA

ATGTGTATTTGCCAACCAGTAATATTGTGCAGCCACAGCTGGCTGACCAGGTATCAG  
CCGGTTATTACAGTAATTTTCATAACAGTCAGTATGAATTTTCGTCCGAGGTGTACTA  
TAAAAATTTACAGCATGAGATCGATTATAAGAACAATGCCAACCTGGTAGGGAATA  
ACAATGTGGAGGCCGACTTACTGTTTCGGGAAAGGGAGAGCGTATGGTTGGGAGAAT  
TATATCAAGAAAAAGAGCGGCCGGCTAAGTGGTTGGATCAGTTATACCCTTTCACGT  
ACAGAACGGCAGATAAATGGCATAAATAATAAATAACTGGTATCCTGCCACGCAGGA  
CCAAACGCACAATATAGCTATTGTTGGTATTTATAAATACAACCACAAATGGACCTT  
TTCTGCAGCCTGGGTGTACAATACAGGCAATGCGGTTACCTGGCCATCCGGTAAATT  
TCCCGTAGATGGAGTGCCGGTATATTATTATGCTTCCCGCAATGGCTACCGCCTGCCT  
GCCTATCACCGGCTCGACCTGGGAGCGACACTTCAATTAAGAACACGCCTAAATTT  
CAAAGTGACCTCAATTTTTCTATCTACAATGCTTATGGTTATTTCCAATCCATACAGCA  
TCAATTTTCAGAAAGATCCCCAGGACCCTGCTCACACCCAGGTAGTACAAACCACTT  
TGTTAAGATGGTGCCAGCTGTTACCTATAATTTTAAATTCTAA

>11

ATGAATATTGTAATTATAGAAGACGAGCTGCTTACTTCAGAAGACCTGGCCGAACTG  
CTTGTTTCGCATCGATAACAATACCAATATTGTTGCGATCCTTGATTCCGTTAAAAATG  
CAACAGCTTTTTTACAACGGTCCCCTCCCGTTGACCTGATCTTATCAGATATTCAATT  
GGGGGATGGGTAAAGTTTTGAGGTATTCAAATCAGTAACGATCCCGGCGCCGGTTAT  
TTTTTGTACGGCATAACGACGAGTATGCCCTGGAAGCCTTTCGAAGCAATGGTGTCTGA  
TTATGTATTAAGCCCTATACAGAACAGTCTATTTCGTACTTCTATTGATAAATTTTCGG  
CGGTTGAAGGATCATTTTTTTGCCAAAGGAACAGGTTTATGAAAAAATTATCCAGGCA  
ATAACCGGTCATATAACTGGTAAAAGAAAAACCAATTCAATCCTGGTACATCATCGT  
GATAAGGTGTTGCCATTGGATTGGAGCAAGCGGCATTTTTCTACATTCATAATGAG  
CTTACCTGCCTGCAATGTTTTGATAACAGGAATTTATCATTGAACAATCGTTAGATG  
AACTGGAAGAATTGTGTGGAGCTGCCTTCTTTCGTATTAACCGGCAGTACCTCTTGAA  
CAGGCGGGCTATACTTGATGCCAGTCACATTCAACATCGAAAGTACATCGTTAACCT  
TTCTATACCATTCAAAGAAGCCCTGGTAGTTAGCAAGAACAGGGTTCGTATTTTTTTA  
GAATGGCTGACACAATAG

>12

ATGCGTATTGCGTCCCGAAAAATTGTAAGCGAAGCCCTGGTCATCCACGCCATTTTT  
AGTATGGGTGTAGTAATGCTGGTAATAACGGGCATGTATTACTACCATTTTATTC  
TGCAAAAAATCGGTTAACCCTTTTGGCTTGTCTTTTCTTCCTGGTCTGTATTTACACC  
GGCAGAGCGCTTTGCGTACAATTCTATCTGCGCAATAAACCGTTTCATTTACGCCTGT  
ATACAGTTTTGGCATTAAATGGCGATCATCATTACCTGGCCGTTGGTTGCAAAAAAGA  
TCTTTGATTCGCCCGGAGACATAATAGAATTTCCGTTACTACCCTGCCCTTCCTTATT  
ATAGGCCTTGTAATGGGTATTTTTATAAAGCTGATCCGGGCCTCCATTCAAAAACAA  
ATCCAGGAAGCCCGGATAACCGCCGAACAAAAACAAAGCGAATTAGACCTGCTGCA  
ATCCAATTGAGCCCGCATTTTTCTGTTAATACCCTGAACAATATCTATGGCATTTC  
ATAACCAACACGAACGGGTACCTGCCCTGTTATTAATAACTAAGCAGCCTGTTGCGT  
TATTCAGTGTACGATACCAAAAACTGTTTGTACCTGTAACGGAAGAACTGGAATAT

ATTAATAATTATATCAGCTTTGAAAAGCTGAGATTAAGCGACCGGCTGGTGTTACAA  
ACCGGGATAGAAACTATAAAAGACCCGGCCATCATGATTGCGCCTATGATCCTGATC  
GTGTTTATCGAAAACGCCTTTAAACATGCCCGGAACACCCTGGATGAAAAAATCTAT  
ATTGAGATAGACCTGACTGTTACCGGTAATTTTATTGTATTTTCAGTTAGGAACTCAT  
ACAATGAATTAACATGAAAACAGCATCAGCCAGGCCAGTTCCGGCCTTGGGCTTC  
CCAACACCATCAGGCGGCTCAACCTGTTGTATGAGGAAAATTATAAACTCGATCAGT  
TTATCGCAGACAATATGTACATTGTTCAACTTCGCTTAAAACTAAATAA

>13

ATGAGAATAATCGATAAACTGGCCTGGATCGCAATCGATAACAAAATGGTGCTTTCT  
ACCAGGTCGTTTGGAAAAGATAAATTTTACATTCCTGGCGGCAAACGCGAAACCGGC  
GAAACCGATGAACAGGCCCTGCTGCGCGAAATAAAGAAGAGCTGAACGTTGACCT  
AGACAAAGCTACCCTGGCAAAATTTGGCATTTTTGAAGCCCAGGCGCATGGCCACAC  
AGAGGGCGTGATGGTTAAAATGACCTGTTATACGGCTTCCTACTCCGGACAATTATC  
TCCCCGATCTGAAATAGAAGAAATGGCCTGGCTAACGTATGCCGATATGAACAGGAT  
CTCGGAAGTTGATAGACTCATCTTCGATTATCTGAAAGCAAATGACCTGATTAATTA

A

>14

ATGCGATTGAAAAATTCCACCCTCATTCTTTTGGATCACAGTTGTAGCAACCGTGCTTT  
TTATTCCATTCTGGGGAGCGTGCATTTATTCGATTGGGACGAAATAAACTTTGCCGA  
ATGCTCGAGGGAAATGATAAAGCTTCATGATTATACCCGGGTATATATTGATTATCTT  
CCATTCTGGGAAAAGCCCCAATGTTTTTCTGGATGCAGAGCACTGCCATGAAGTGG  
TTTGGCGTAACTGAATTTGCCGCCGTTTTCCCAATGCCATCTGTGGTATTGCCACCC  
TGCTTGTAGTATATGCTGTTGGCAGGCGCATTTACGATACCCGTTTTGGTATATTGTG  
GGCGCTGGCCTATGGCGGTTCACTTTTTCCCAATATGTATTTCAAATCGGGAATCATC  
GACCCCTGGTTCAATCTTTTTATTTTTCTATCTCTTTATAATTTTCATCCTCTACCATTG  
GAAAAAGAATGGTTTCGATAAGGAAGGACTAACAAAGCCACTTTATTATTATGTGAT  
CTGGTCAGGCGTGTTTCATGGGGCTGGCCATACTCACCAAAGGTCAGGTGGCCCTGAT  
GATCTTCCTGCTGGTCTCGGGTGTATCTTATTTATAATCGCTTTAAGATCTATTTCA  
ACTGGGGGCATGCGCTTCTTTTCTGGTCATCTCTTCTGGTATTGTCTACCTGGTAC  
GCCTACGAAACCATCACGCGGGGCACCTGGTTTATCACTGAATTCCTGAAATATCAA  
TACCGCCTGTTACGACGCACGACGCAGACCAGGCCGGCTTTTTTGGTTATCACTATA  
TAGTGCTGCTTGTAGGTTGCTTTCCAGCTCCATCCTGGCTATTCCCGCCTTCTTTAAA  
GGCAAATACAACAGCCGTTTTGATAAAGACTTTAAAAAATGGATGGTCATTTTGT  
TGGGTAGTAACTGTCCTTTTTACGATCGTTCAGTCACGCATCATTCACTATTCCTCGC  
TGGCCTGGTTCCCGTTACGTTCTGGCAGCTTATTCCATTTATAAATGGGAGCTGAA  
TGAGGCTGTTTATAAAAAATATGTCGGCGTACTCCTCGGCATCCTTGGCGGAATTATT  
TCACTGCTGATCCTGGGCGTGGCTATTATAGGTTTAAAAGTAAGGCTCCTTGCGCCTT  
ATGTAGATGATGTATTCCGCAAAGCAAACATGGAAGCGGATGTACATTGGGGTGGCT  
GGGAAGGTATCGTTGGCGTTCTGCTGGTTGTTGCACTGATCATTGGAATAAGAAAAT  
TAAAACAGGGACAGTTCGTGAGAGCTGCATTTACCCTCTTGGCGCCATGGCCATTG



TAGTG TTCCTGGCCTCGGCCATCATTGTGCCGAAAGTCGAAAAGTATTCTCAGGCTG  
CGAGCATTGATTTCTTCATTGCCCGTCAGGGTGAAGATTGCTATGTACATTGTCTGGG  
TTTTAAAAGCTATGGTGTGTTGTTTTATACCCGGAAGGAAAAGCCAACCAACCCGGA  
TAGCTACAACGAAGAATGGCTGTTAAAGGGAAACATAGATAAACCCGTTTATTTTCGT  
AACGAAAGTAGACCGGGAACAAAACCTATAAACTCCCCAGTTAAGAGAATTGTATC  
GCAAAAATGGCTTTGTGTTTTTAAAAGGGAACCGCCCGCCAATAA

>15

ATGGCAGCCATTAATTCCATTCAGCAAATCGATTTATTGCCACAACCAGGCAAACCC  
TATTTTAATTTGAACCGGGAGTGGCGGGAAGAGTTCATTTATTTTTTTATTGGTAGACC  
GGTTTCAGGACAGCCAGGCCAGATCACCAATAAACCCAGCCGGGCCGGGTGGCTGGC  
ATTCATACGCCGACAATTTTTATGGCGGCACCATTCGTGGCATTACTAACAACTCG  
ATTATATTGCAGGGCTTGGGTGTACAGCCATCTGGCTCTCGCCTGTTTTTAAAACAA  
TGCCGGCGCTTACCATGGATATAACATTAATAACTACCTGAACATAGATCCGAATTT  
CGGTACCAAACAAGACCTGATTGATCTTGTTGATGCAGCACACAATTATCAATTGAA  
TGGAGCGCCATTTCCCATCCGGATCATTCTCGATGTGGTGATCAATCATTCTGGCGAC  
AACTGGTTTTATAAGAACGAAGACCAGCCCGGTGTACAACCCTATAAATATTTCAAC  
GACATCCGCTTTGATTTTGGAACTGGCGCAAACCCGACAGGCCCGTGCCACTGGAA  
TTGAGGAACCTGGATCTGTATCACCGCCGTGGTTCTATAGCCAGCGCATCGGGCTAT  
GACACATATCCCGAAAACCAGCACGGTGACCTGTCTGGACTGAAAGATTATGCCAAT  
GACGATGATAGGGCGGGTTCTGAACCTGATCAATATTCTTATTAAGGCACATTGTTAC  
TGGATCCGCGAAGCAGACATAGACGGGTTTCGGGTGGATGCAGTAAAGCACATGGG  
GCCGCTGGCATGTTCCCGTTTTGTTCCAACATCCGCGAGTATGCCTATTCACTGGGG  
AAGCGCGGATTTTTCTGTTTGGCGAACTGGCCACGCCAATGATGATTTTACAATC  
AATACCTCGGCCAGAACACTTCAGTGTCTGATGGAAATAATACCGTTTTTTTTCGGGAT  
CAATTCCTGCTTGATTTTCGGTTGGCCGGTGCTGGCATAAGGGCAGGGCTCAGGGA  
TGTTATTACAGGCAATGCATCGCCACAGACTTTATTTGAACGCCTGCAGGCGCAGCA  
ATCCAGGGCTTTGAACCGCGGCGAGCTGGGACGTTACCTGGTTAGCTTTATCGACAA  
CCATGATTCCTTCTGGCAACCCAGGGGAAGATTTGGTGCTTACGCTTCCGATCAGCA  
GGTCATTGCAGGGATCGGCTTTGTACTTTGTTCCCTGGGAACTCCCTGTATCTATTAT  
GGTACTGAACAAGGCTTTTTCCGGATCAGGAGCTGATAATAATATCAGGGAAGCGTTG  
TTTGACAAGGCAGGCCCGGCCAGAGTTTGTTGAATACACATTGTAATATTTACCAG  
GAGATTGCCAAAATAGCAGCTGTTATGCGAAGCCACGAGCCGCTTCGCTTCGGCAGG  
ATGTATTACCGGCAGATATCGGGAATGGAAAAGATTTTGGTTTACCGGTTGGCCCT  
GAGTATACCCTTGCCTTTTCGCGTTTGTTGTATAGCCAGGAAGTTTTAGTGGCGTATA  
ATGTCTCCTCATCTGCCAGGAATGATTGCATTATTGTAGATGCTGCGTTCCATAAAGC  
GGGTGACAACTAACATTCCTGTATGGAGATGTTGGGGTGTGCAGGTACAGGTGGC  
GCCTTCGGGTGCTTTGTTTGTGCAATTGAACCTGAAATCGGGGCAGTTCGTTATTTG  
GAATAG

>16

ATGAATAAAATCAAGGTATTATTGGTTGATGATGAGCCTGTGTTAGCGTCTATCATC

AAGGAATCACTGGAAATGCGGGAGTTTATCGTTCATATTGCATTAATGGCATAGAT  
GGCTGGAATCAGTTCCGTGAAGCCAGACCTCTGTATCATTGATGTGGTACTA  
CCCAGGAAAGATGGTTTTTCACTGGTATCTGAAATTCGCCTGGTAGATGATAAAGTA  
CCGATCATGTTTCTCACTGCAAGAACAGAAACGGAAGATGTGATCAGGGGTTTTGAA  
ATTGGTGCAGATGATTATATGAAGAAACCTTTTTCCATGGAAGAACTGATCCTGAGA  
TTGAAGGTGCTGGTAAGGCGGCGGGTTGGCGGGTTCAGCCCCGTTGATCCTTCG  
GAGGAAACAACCATTGGCCGCTTTTTGTTTAATTCCCGCAGAATGGAATTGAGCCGG  
GACAGGGAAATAATTCAATTATCACAAACGCGAAGCGGAGTTGTTACAATTGTTGAGC  
GATTCAAAAAACAGTTTGCTCGACAGGAAAACGGCGCTTATAAAATTGTGGGGAAA  
GGATGATATTTTTCTGCAAGAAGTATGGATGTATATATAACCCGGATAAGGAAATA  
TTTCAGGCTGGACAGTTCTGTTGAAATTGTAAATATCCGGGGAAAAGGCTATAGCCT  
CATAGAGCGTTCATAG

>17

ATGAAAAAGTATGATGCTTTGATCATAGGTTTCGGGCCAGGCTGCCAGCCCGTTGGCC  
ACCAAGCTGGCTGCCAAAGGCTGGGAAGTTGCCCTGGTAGAAAAAGAACATATCGG  
CGGCACCTGCATCAATGAAGGGTGTACGCCTACCAAACAATGGTAGCGAGTGCAA  
AGAACGCCTTTCAGGCAAGGCGGGCAAAGGAGTATGGCCTTACAACCGGCAACGTC  
CAGATTGATATGCAGGCCATCATCAACCGGAAAAAGGGTGTGGTAGACCGGTTGAG  
AAATGGGTTACAACAGTCACTCGAAAAACAGGAACATATCGACCTCCTTTGGGGAG  
AAGCTTTTTTACC GGTAATAAGCAGATCGCTGTTACCGGTAAAGATGGTAAAACGC  
AATCGTACACGGCCGGTCATATTTTTATCAATACAGGCGCACGCCCCGCCATTCCAC  
CCATACCGGGTATCGACGGTGTGCCTTACCTTACCTCTACTACCATAATGGAATTACA  
AACAGTACCGGAACACCTCGTGATCGTTGGCGCCGGTATGTGTCCATAGAATTCGC  
GCAAATGTTCCGGCGGTTTGGCAGTAACGTTACCATCCTTAACCGGTCAACTGGTTTG  
CTGGCAAGAGAAGACACAGATGTGTTCGGACGGGCTCCAGTCGATCCTGGAAGAAGA  
GGGGATCAATATTATACGAAACATAAACGTGGAGGCTGTCAGTAAGGATACAGGCG  
GCATTATTACATTGACCACAAATGACAACGCGCACCGAACTATTACCGCCTCTCATG  
TATTGATTGCCACGGGACGCCGTGCCAATACCGATAAGCTTCAATTGAAAAAACGG  
GGGTGGAACAGATAAGAATGGTTATATTAAGGTGAATGAAAACTGGAAACAACCT  
GTTCCGGGCATCTATGCGCTGGGGGATGTAAAAGGCGGCCCCGCATTACCCATATT  
TCTTACAACGATTACCTGGTTGTTTATAAAAATATTATTGAACAACAGAACGTCACTA  
TCAATAACCGGCCTGTTCCCTTATTGTGTTTTTCATGGACCCCGAAATGGGACGTGTAGG  
ATTAAATGAAACGGAGGCCAAAGAACAGCAGTTACCGTATAAGGTAGCTAAGCTGC  
CTATGAATTATGTGGCGCGGGCTACTGAAGCCGGAGAACCCAAAGGGTTCATGAAG  
GCGATCGTACATGCGCAAACCGATAAAATCCTGGGCGTGGTGGTCATTGGCGCCGGT  
GGTGGTGAACCTGATGTCATTATTGCAAATTGCCATGCTTGGCGGGGTTACGGCCAGT  
CAGTTAGCCGAAAATATTTTTGCCACCCCACTTATGCAGAGTCCATAAACAACCTCT  
TTAATACAATCGCATGA

>18

ATGAACGGTTCACAAAACCTTATGGCGTTTTATAGCAGAGCACTGGCAAAAATTGCTG

GAGCAAACCGTTCAGCATATCGGCCTGACGCTGATCTCCATTATGCTGGCTATAGTC  
ATTGGCGTGCCGGCAGGCATTTATGTTGCCCGCAAACAAAACCTGGCTGCTCCTGTA  
ATTGGCATCACTGCCGTATTTCAAACCATTCCCAGCATTGCCCTGCTGGGCTTCCTGA  
TTCCATTAGCCGGCATTGGCCCCACACCTGCCATCATTGCTTTGTTTTTGTATGGGTT  
ATTGCCGATAGTTAGAAAATACCTATAACGGCATTATCGGTATCGATGCAAATATCAG  
GGAGGCGGCCATTGCTATGGGAATGACCCCGGGTGTGAGGCTATTAAGTAGAATT  
GCCATTGGCGATGCCCGTGATCCTGTGCGGGATCAGAACGGCTACCGTGATCAATGT  
AGGAGTAGCCACACTGGCCGCTTACATTGCAGCTGGCGGCCCTCGGTGAATTTATCTT  
CGGTGGTATTTTCGCTGAACAATACCAATATGATCCTGGCCGGCGCTATCCCTGCTGCC  
TTGCTGGCCCTGTTACTCGACTTTTTACTATCCCTGCTGCAAAGATAAACTTAAAA  
AATTGCTGCGGCATTTATAACTGTACCGCTGTTGATCGCTGTCAGTTCAATTTACCT  
CACACCCGGCATCCGGCATAACGGGTTGCTGGCTGGTTTTACACCGGAGTTTATGGG  
CCGTAAAGATGGCTATCTCGACCTGCGGTGCGGTGTATGGCCTGCAGATGCACCCGGT  
AGTGATCAGCGATGCTGTAATGTACAAAGCGGCGTATGAAAAAAGCTGGACGTGA  
TCAGCGGGTATAGTACTGATGGCCGCATCAAAGCCTTTGACCTGGGTACGCTCATAG  
ACGATAAACATATTTTTCCGCCTTATTATGCGGCGCCATAGTAAGAACAGGGGTGC  
TGCAGCAATACCCAGAACTGGAAGGAGTGCTGAATATGCTAACGGGCAGGATCAAC  
GATTCTATTATGACCGGGCTGAATTACCGGGCCGATTACCTGCACCAGGAACCGGAA  
AAGATTGCGGAAGATTTTCTAAAAGCACAGGGTATCTGGAAAACGCCGCGCGGGCGG  
GAAAAAAGGAGTGGTGCATATTGGTTCAAAAATATTTGCGGAGCAATACATCCTGAG  
CAATATGTATGCTATGCTCATAAAAAGGCTATACCGATCTTGATGTAGAAACAAAGAC  
GGTTTTGGGCGGCACCAAATATGTTTTGAAGCGCTCAGGAATGGCCACATCGACCT  
GTACCCGAATACACAGGAACAGGTTTGGCTGGTAGTGCTGCAAACAGACAATGCCAC  
TACAGCCAGATTGATACAGGATAAAGATGCGGTATACAGGTACGTATACGAACAATT  
CCTGCAACAATATAACATCAAATGGTTACAACCGATCGGGTTCAATAATGCGTATGC  
GCTGATGATGCGGCAAACGCAAATGAAACAACCTGGCTATTGCCAATATTTAGATCT  
GGTAAAACCTAACAGCTAAACCATGA

>19

TTGAAAACAGTTGCCTTAAACAGCGCCGCTGGCCGATGGGTCATGATTGCCACTATT  
GTGGCTTCTGCCATGGGGTATATAGATATGACCGGGCTTAATGTGGTGCTGCCTGCG  
CTTCAAAAAGGGCTTAACGCCACAGGCCCGACCTTTTCTGGATCCTGAACGGTTAC  
CTGTTGATGATGGCTTCCCTGATCCTGATCGGCGGGCGCACTGGGCGACAACTGGGG  
CGAAAAAGGTGTTTCATGGTGGGGATCACTGTATTTATTGCCGGGTCTGCACTTTGC  
GGATTCGCCGGCAGTATAACAGCCCTTGTCTTTTCAGAATTATCCAGGGCATCGGC  
GGGGCCATGATGATCCCTGGCAGTCTTTCGCTTATCTCTTCTATCGACGAAAAAC  
AACCGGGGAAAGCTATCGGCATCTGGTCTGCCTCTTCTACCATATTTACGATGGGCG  
GCCCCATGCTGGGCGGGCGCACTGGCCGATGCAGGTCTTTGGCGGTATATCTTTTTCAT  
CAACGTTCCCTTGGTATTGCCACACTTATCATCCTTCATTTTAAAGTAAATGAGAAC  
CGCGAGGATGACCGTAAGGGCCTCGACTTATGGGGCGCCGGCACCCCTGGCCAGCGG  
GTTAACGTTATTGACGTTTCGTTTTCTTCGCATCCCGATTGCCGGTTTTTCATCAGCTA

ACCGTTTATCTTTCTTTAGCGGGCGGAATCATTTTCCTGATCCTGTATCTCGTTATTGA  
AAAAAGGAGCAGCCACCCCATGATGCCGCTAAGCTTATTTTCCAATCCTTTGTTTCA  
CGGCACTAACACCCCTCACATTTTTTTTTATATGCCGGTCTTAGCGCGAGCACGCTTTTT  
CTTTCCCTGAACCTCGTGCAGGTGCAGGGTACTCCCAGTTTCAATCAGGGCTTACCT  
TTTTACCTTTACTATTCTTATGGCTGCAGCATCGGGTTTTGTAGGCGGACTGTCTGA  
CAAATACGGCTCGCGCTTTTTTTTTGATTGCAGGTCCTTTGATCACCGGCATTGGGCAA  
CTTCTGCTCTCATTGGTTACCAAACCGATGGCGCCCATCAATACTTTGTTACTTTTTT  
TCCCGGCATCCTGTTGCTGGGTTTTGGGTATGACGCTAACAGTTACGCCACTTACCTCG  
ACGGTGATGGGATCTGTTTCCAAACATTTTTTCGGGGATTGCTTCCGGTGAAACAATG  
CCATGACCAGCATTTCGAGAGTGGTGGCCAACGCCGTATTCGGCGCACTGGCCATTG  
TATTTTTCTCAGCAGCCCTGCAGCACGGTATGGATAATACTACGCTGAACCCACCA  
AAAAGAATATTGTTTTTGCACAGGCATCCAACCTCGGCAACGCCGCCGTTCCACCGG  
AACTGGCTGCGCAGCAAAGCACCATTAACAACCTTACCAGGAAAGTTTCATTACCG  
CCTATGCGAAAATTCACGCATCAGCGCCGGTTAAGTTTTTTTTGCAGCCCTGATGAC  
GATTGTTTTTATCAGGAAGAAGGTGCCTGCTACGCCATCTTAAATGGGAACACTTAC  
TTTTCAAAAAGTATTTAATACTTTTTTCAGTTGATGATCTTGATAAAGCCTTCGACTTTT  
ATACCGGAAGCTTAACCTGGATGTTTCCAGGACGCCCATGAATACCTTAACTTTAA  
ATATTCCCGCAATCAGAATGGCATGATGATCTACGAAAAGACAACCACGAGCCT  
GCCACCTATACAGTGCTTAACTTTGGCGTGAAAGATGTGGAAGCGGCCGTTGACGAA  
CTAACGGCGCGTGGTGTGTTTTCGAACAATATGACAATGGTCCCTTAAAAACCGAC  
AAAAAGGGCATCTCCCGGGGCGATGGACCGGTTATAGCCTGGTTCAAAGATCCGGC  
AGGTAACCTTTCTTTCTGTTATTGAAAATAATTAA

>20

ATGAACTATTTGAACGGGATAGAGAAGGTTGAACAATTTGTAACCTGCAATGTATAAC  
GCAACCGAAAGCCCCAGATTTCTTATCATAATTTAGCACATACACAATTGGTAGTA  
CTGAAGGCTACCGAAATTGCCCGTTTTATAACTTCGATCAGTTGGGCATCTTTACTG  
TACAGGCTGCTTCTGGTTTCATGATGTAGGTCATTTATTTGGATATTTGAAAATCA  
TGAAGATGCGAGTGTATTA AAAATGCAGACCTTTTTGCAATTGGCGGATGTGGATGA  
ACAAATAATTGACATGATAAAAAGATGTATCCTGGCAACCAAACCCGGCGCTTACC  
GGCGTTGCTGATAGAGCAGATCATGTGCGATGCGGATACCTATCATTTTGGAACTGC  
CTGTTTTCGCAAACCAATGAGTTTGTA AAAAGAAGAACTGGAATTGCGCAAGATAA  
AATTACCGGCAACTGGGTGGCCGCAAGCCTTCAACTGCTTCAACGGCATACTTACA  
AAACA ACTTATTGCCAGGATGTGCTGGCGGAGGGCAAGGAGGAAAACATCCGGTGG  
TTGCAGTCGATGCTGAAAAAGGAATTATAG

>21

ATGAAAGTCTTATCTGTAAATGTAGGCATGTCACGTGAGGTCGGGTTCCGCGGGAAG  
CTTATCAGGACTTCAATTTTTAAAAACCGGTTACAGGCCGGGTGGTTGTTAGACGG  
CTTAATATTGATGGCGATTGCCAGACAGACCTGGGTGCTCACGGCGGCGAGCACCGC  
GCCGTATTTGTTTACCAGGCCGAGTCATACGAATACTGGCGGGAACAATTGAAGCGG  
ATTGATCTGTATTATGGGCAATTCGGCGAAAACCTTACTGTTGAAGGATTAGCAGAC

AAGGATGTATGTATTGGCGACCGGTATGCAATCGGTACAGCTGTGTTTGAAGTTACA  
CAACCAAGAGTTACCTGTTATAGAGTGGGAATAGCATTGGGGGTGCCTGAAATGCCG  
GCTTTGCTGGTGTTCGCACAAACGACCCGGGTTTTATTCCGCGTTATCCAGGAAGGTG  
AGATCGGCGCGGGTGTATCTTATACAAAAGATAGCTGATGGTCCTGAACAAATGAAC  
ATTGCCGAGGTAGATGCCTTGTGTATTCAAAGAACATCCGAAAGAACAATTGCAG  
AAGGCATTAAAGATCCCGGCATTGAGCAAAGGCTGGGGTCAATCGTTCCAGGATCTT  
TTACAATCGGCCGAAGCGGGAATAACAACAGGAAATTCAGGTCTTCCGGAGTTAAT  
GGCCGCCCGTTGCATGGCCGGGATACCGCTCTTTTGTGTGCAGGCATTGCACCAG  
GAAACCGATGATATCCGCTCGTTTGAATTACGCCCCGCCGACGGCAAACCATTGGCC  
GCATTTTTACCCGGTCAACATATTGCTGTCAGACTTCCTGCCGGACCCGGTAAAACCC  
CATTGACCCGGATGTTTTCGCTGTGCGGATCGCAAGGCGCCGGCACATACCGGATAG  
CTGTTAAATGGGAGCAGGAAGGAAAGGTGAGTCAGTATATGCATACGCAGCTGCAT  
GAAGGTGATACGCTTGATGTCAGTGCGCCGAGGGGCGATTTTGTTTTATCGGAAGAT  
CAGCTTCCTGTTGTATTGAGTGCGGGTGTTGGCATTACCCCTTGCTGGGCATGT  
TACAGGCTATCAGGAACAGCTCACCTATGCGCGAAGTGTGGTGGGTGCACTCGGCAC  
GCAATGCCGCGAATTATCCGTTTATGCATGAGGTGGAAGACGCCGTTTCGCATTTAC  
CCAACCTCCACAGCATAAAAGTATATAGCAGGCCGGCAGCAGAAGAGGAGATCGGA  
AAACAATATGATATCAGCGGACATCTGGATATAACCGTTTTGAATAACCTGAAATTT  
CCCGCCGTTGCCATTACTATCTTTGCGGCCCAATGGGTTATATGTCTGGGGTTACCG  
CAGCCCTCACGTCAATTGGGTGTTCTTCCGGCCAGATCAGGTCTGAGATCTTTATCAA  
TTCCAACCTGGCTACACCGGCTGCCGTTGCTCCACATCTGCCTGTTGATAACACGGGC  
GCCGGCCCATTCGTTAGTTTTACAAAGAGCAACATTTCAATTCCTGGAATGCCCGTT  
TTAATAATCTGCTGGAAGCGGCTGAAGCTTGTGACGTACCCGTACAGTGGTTCGTGC  
GGGTGGGCGTATGTCATCATTGTGAAAGTTCCTGCTGGACGGGAATATTGAATATA  
CCTCATCACCGTTAGATCCACCTGGTACCGGCAGATTGCTGATCTGCTGTTCTGTTCC  
TGTTACTGATATTGAACTGGATCTATAA

>22

ATGCAAAGAAGATCATGGATCAAAAATACCGGCGGACTCCTTTTGGGGTCCGCTTTA  
CCGGTTACCATAGAAGCAGCCAATAAAAAGCCGGTGCTGCGAGTAGCCCATCTCACC  
GATATTCATATAAAAGATAAATGGGATGCACCAGCGGTTTCCGCCGCTGTTTACAA  
CATGTGCAGGACCAAAGCCGGGAGTAGACCTGATCCTCAACGGCGGCGATGTTGTT  
TTTGATATGAACAAGGAAAACCTGGAAACTATAAAAACAGAATGGAACCTTTGGCA  
TAGCATTGTTAAAGCAGAATGCTCTATTCCTATGCACTACGCCCTGGGCAATCACGA  
TATCTGGTGAATGAAGATGACAAGGGCCAGGCATTGTATGGTAAAAAGTTTTCGCT  
GGAACAATTAGGATTAAGCAACTCTTATTTCCTTCTCAAAAAATGGCTGGAAGTT  
TATTGTGCTCGATAGTACGCACCTGGATATTGATAATACCTGGTACATTGGCAAACCT  
GGGCGATGAGCAAATGAACTGGTTACAACAGGAACTAAAAGCCACACCTGCTACCA  
TGCCCGTTTGTGATTGTCACATATCCCATTTTGACCGCCACCCTGATGGTAGAAGA  
TCATATCGTAAATAAATGGACCATGCTTGGTGGCGACATGCATACTGATACGGCAA  
AATCATTGACCTGTTTTACCAGCATAAGAATGTAAAATTATGTTTGAGCGGACATATT

CACCTGCGTGATAAAGTGGTGTACAACGATGTGACCTTTATTTGTAACGGCGCAGTA  
AGCGGCGCGTGGTGGGAAGGCAACAGACGGCAAACGGCGCCAGGTTATGGCGTGAT  
TGATTTTTATGCGGATGGGAGTTTTGAAGAGCGGTATGTGAATTATTA

>23

ATGAATAATTCAGAATTGGATGCCACCGACTGGCAAATACTCCGGCTTTTACAAAA  
GATGCCTCTCTTACCAACAAGGAGATCGCATTGGAATTGAACAGATCTGTGGCTACG  
GTACATGAGCGCATTAAACGGTTAAAGGAAGAAGGGTATGTAAAAAAGATCGTGGC  
CCTGCTTGATAGAAAAAAGGTAACAAGGGACTCATCGCTTCTCGCATGTTCAACT  
GCATGACCATAACCGCGCAAACCCTGTCAACTTTTGAAAAGGAAGTGGCGCGTTTTCC  
CGAGGTGATGGAATGTTTTAGATGACGGGCACGTTTGATTTTATTCTTCGTATTGCT  
ACCAGCGATATGGATGCTTACCACGATTTTTACCGGAACAACTGGCCAACCTGCC  
AATATTACTACCGTGCAAAGTTTTTTTTGTTTTGTCTGAAGCGAAAAGTGATACGGCGT  
ATCCTATCTAG

>24

ATGGAGAAACAAAAATCAGGTGGAGCCTGCCCATATTGGGGAAACTGCTAAAGGA  
TTCCTTTAACCGGTTGCAACAGAACGACCCGTTACGCATGGCCGGCGCTACTGCATTT  
TTTACCAGCTTTGCCCTGCCGCCTATTATGGTGCTCATTTTCCAGTTCTTCAGTATTTT  
CTTCAACAAAAAACTGGTGGGCACTGAAATGCGCAATGTACTAACGGCTTCGCTGGG  
GAAAGAAAATACCGAGCAATTGCGCATCACCGCCGGGGGATGCGCAACCTGGCTC  
AAAAGTGGTACATGGTGGTGATAGGTATTTGTTCCCTGATCTTTGTGGCCACTACTTT  
GTTCAAGGTTATTCGAAACACGCTGAATGATATCTGGCATATTCGTCCCGAAAGATC  
TGGCTTTCTGTATGACCTTACCGTGCGGGGCCGCTCCCTCGCGATCATCCTGGTGGCC  
GCCATTCTTTTTATTGCCGGTGAAACCGTTGCCATAGGCCGGGAAGTAGCTGGCAA  
TATTTTGAGAGTTTTTGGCCGCAGGGCGGAGAATTTTTTACCGGTCTTATGAAGGAGC  
TCATCGGTATGCTCACTATCATCCTGTGGTTTATTGTGCTGTTTCAGGTTCTGGCCAA  
TGCGCGGCCTTCCTGGCGGGTGGCCAGGGTTGGCGGCATCCTCACAGGCGTATTGTT  
TTATTTGGCAAATCTTTCTCTCCTATATGATGCGGCACAGCAATGCCGGTATTGTT  
TATGGCGCCGGCGCCGCCCTGGTATTGATCCTGCTGTTTATGTTTTATTCTTCTTTTAT  
TTTATACTTCGGCGCCTGTTTTATAAAGAATATGCTGCGCTTACCAATGATCCTATT  
GTGCCTGCGCATAAGGCGTATGAGTACGAGTTGCAGAAGGTGGAGGAGTGA

>25

ATGGAGCATTCATTTTTTATAAAGCCCTGGTGTTCCTGGGTGCGGCAGTGTTATTTG  
TGCCGCTGGCGAAAAAGTCGGGCCTGGGTTTCGGTATTAGGCTACCTGATCGCGGGGG  
TAGTGATCGGGCCTTCGGTGTGGGGTTTGTGGCGCCGAAGGACAGGATATTATGC  
ATTACGCCGAGTTTGGCGTGGTAATGATGTTGTTTTAATTGGGCTGGAACCTGGAACC  
GGAATTGTTATGGAACTGCGGAAATCAATCCTGGGCCTGGGTGGCTTACAGGTGAT  
TGTGAGCACGGTATGTATAGCAGGCATTGCCTTGCTGTTTCACTTTAACTGGCAACAG  
GCATTGGCGTTAGGTATGATCTTTTCTTTGTCATCTACCGCCATTGTATTACAAACCA  
TGGGAGAGAAGGATTGATGCGAACCTCCGCGGGCAAAGCGCTTTTGCGGTATTGT  
TGTTCCAGGATATTGCGGTGATCCCCATGCTGGCGCTTTTCCCTTTACTGGCCACAAC

CGATATTCTACATAAACCCTACCGATACGCATGATGCGGGTACCTGGGTAGCGG  
GCAACCGGCCTGGTTGCATGCCGCCATTGTATTAGGTACTATTGCTGCGGTTATTGCA  
GTGGGTAGAATTGCCGTGCGCCCTTATTGCGGCTGGTAGCCAAAACCAATATGCGC  
GAGATCTTTACGGCAACTGCGTTGCTGATCGTTGTAGGCATTGCCGTATTGATGGGCC  
GGATCGGATTAAGCCCGGCCCTTGGTGCATTCTTAGCGGGCGTTGTTCTGGCAAACA  
GTGAATACCGGCATGAACTCGAAAGCGATATAGAACCTTTTAAGGGTTTGTGCTGG  
GTGTATTTTTATAGCGGTGGGCGCCTCTATTGATTTTGGGCTGGTAGGGCAGCATTT  
GCGGGAATAATCATGTGGGTGTTGATCCTGATCGTGGTGAAGGCGCTTGTGATGTT  
GCTGCTGGGCAAAGTGTAAAATGGGCACCGAACAGAAATTCATTTTCTCCTTCAGT  
CTTACCCAGGTAGGCGAGTTTGCTTTTGTGCTGTTTTCGTTTTCTTTCAGCAGGGCAT  
CCTGTGCTGGAACTACCAATATAATGACAGCCGTGGTTGCCATCACTATGGGATT  
AACCCCGTTGATAATTATGCTCAACGAAAACTGATCCTGCCCGGGTGGGCACAGA  
CGAAAAAGAAGAACGGCCGGCCGATGAGATCGATGAAAAGCACCCCGTTATCATTG  
CAGGCTTTGGTCACTTTGGAAGTACCATCGGGCGTTTTCTGAGAGCCAATCAGATTCC  
CGCTACGTACCTTGACCTGGATTCTGACCGCGTGGATTCCCTGCGCAAATGGGTTTT  
AAAGTGTTTTATGGCGATGCCTCCCGGGTAGATCTTTTACACGCTGCCGGGGCAGAC  
AAAGCAAAGATCATTGTGATAGCCATCAGTTCGCCCGAAAAAGGCTGGAGATGAT  
AGAGGCCGTAAAAATGAATTTTCCCATCTTCATATGCTGGTGCGGGCTGCCAACCG  
GTACGATGCTTATGATTTGATGAACGCCGGGATGCTGCATATTTACCGGGAATCGCT  
GGATACCAGTTTGC GCGTGGGGGTTGATGTGATGAGCCTGATGGGTTTCAGAAAATA  
TACCGCCCAACGTTTGGCCAGAAATTTTATCCGGTATGATGAGGCCAATCTGAAAAG  
ATTATCTGCCATAAGAAACCCGGATGAATATGTGGTGAAGCAAGAAAGTATATGG  
AAGAAATCGAAAGCGTTATTCAATCAGACAGGCAATACCTGACCGGTGAAAGTGAT  
CAATCCTGGGACCCCGATAAGCTGATGGAAGAAGTACGGGCCTCCTGCAGGAAGA  
CCCGCTGCAATGA

>26

ATGAAGAAATTAGTTTCCGTATTCATTTTAGTAATTATTATCGGCAGCGGTTTTGCC  
AACAGTAAAAGTAAATGGCGCGTTGAAAGTAGTGGGTACAAAACCTGGTGAATGAA  
AAAGGACAGCCAATCATTTTGC GGGCATGAGTTTGGGCTGGCACAACCTGGTGGCCA  
CGTTTTTACAATGCCGGCGCCATCAACTGGCTGCAAAAAGACTGGGGCTGTACAGTT  
ATCCGTGCAGCCATCGGCGTTGAACCTGACAGCGGGTATATAAAATATCCTGACTGG  
GGAATGGAAAAAGCAAAAACCTGCGATCGATGCCGCTATAAAAGACGGAATTTATAT  
TATCGTTGACTGGCACAGTCATCACATCAGGCAGGAGGAAGCCAAACAGTTCTTCAC  
TAAAATAGCAAAGGAATACGGAAAGTATGCCAATATCATTTACGAGATCTTTAATGA  
ACCCGCAGAGAATACCTGGCCCGAAGTAAAAGCGTATTCTATTGATCTGATAAAAAC  
CATCCGGGCCATCGATCCGGATAATGTGATCTTAGTGGGCTCACCGCATTGGGACCA  
GGACGTACACATTGTTGCAGACGATCCTATCAAGGGTTATAAAAACCTGATGTATAC  
CTTGCACTATTACGCGGACACTCACAAGCAGGAGCTGCGCGACCGAGGCGACTATGC  
CCTGAAAAAAGGCTTGGCCCTGTTTATCTCCGAAATGGGCGGTATGTCCCATACCGG  
TGATGGCCCCATCAATAATCCGGAATGGATGAAATGGATTGATTGGTCTGAAAAAA

CAAGATCAGCTGGGTTAACTGGTGTGTAACGGATAAAAAAATGTAACCTGTTCCGT  
TCTTGAACCCACTGCTTCTTCAACCGGGCCCTGGAGTATGAACGATTTGCCTGACTGG  
GGTAAACAAACCAGGTCGCTCATTAGAAAATATAATGGGTTAAGACCATAG

>27

ATGAACACTATTTACGTAGACGTGTAATAAAAACGATTGCAACCGGCAGCGGCATC  
CTGCTCCTTTCTCCTAAATCACTATTTGCATCCCCTACCCGCGTTAAAGATAAATTGG  
GTATTGCCCTGGTTGGCCTTGGCTATTACAGTACCGACCTGCTGGCGCCTGCCTTACA  
GCAAACAAAACATTGTTACCTGGCAGGTATAGTTACCGGCACCCCGGCCAAAGCGG  
AAGCCTGGAAGCAGAAATACAATATTCCTGACAAGAACATTTACAATTATCAAACT  
TCGACACTATTGCCAACAACCCAGACATCGATGTGATCTATGTGGTGTGGCCCCCTC  
CATGCACAAGGAATATGTGATCAGGGCGGCGAATGCCGGCAAAGAAGTATGGTGCG  
AAAAACCCATGGCCTTAACCGAAGCGGAATGCAAGGCAATGATCGAAGCCTGCCGC  
TCCAATAAGAAATCACTGGCTATTGGTTACCGGCTGCACCATGAACCCAATACCCAG  
GAATGGCGAGGCATAGTAAAAGCAAAAAGCTGGGCAAAGTAAACCAAAGTAAATTG  
TGCAGCCGCCTATCGCGATAACCGTACCGACCACTGGAAACAGAAAAAAGAAATGG  
GCGGCGGCGTTTTATACGACATGGGCGTTTATGCCATCCAGGGAGCAAGACTGGGCA  
CCAACCTGGAACCGGTTGCCATTGTATCGGCAACCACCTCCACCACCAGGCCGGAGA  
TCTATAAAAACGGACTGGATGAAACCACCATCGCCACCCTGGAATTTCTGGCGGAG  
TAACGGCTGATATTAACCAGTTTTGGCGGAGAACATCAACTTCCTCAACATCACCT  
GCGAAAAAGGCGAAATAAAAATAGATCCCTATTCCGCTTACAATGGCCAGAATGGA  
ACAAGTCCGCTGGGAACCATCAACCATCCTTACAGTGTACCTTATCAACAGGCCAAA  
CAAATGGATGATGATGCATTGAGCATTTTAAACAAAAAACCGATGCTGGTGCCGGGC  
GAAGAAGGCCTGCGCGACATTAGGATCGTAGAAGCAATTTATAAATCAGCAGCAAC  
GAAACAACGGGTTAGTCTATGA

>28

ATGTTCTCCAAAACATGTGAATATGCAATACGGGCGGTGATATTTATAGCGCAGAAA  
ACTGTTGACGGGTCGCGCATAGGTATTAAGGAAGTGGCAGCTGGCATTGACTCACCC  
GAACACTTCATTGCAAAGATCCTGCAGGAGTTAAGCCGGAAGGGGATCATAACAATC  
ACAGAAAGGGCCAACCGGTGGTTTTTATCTCGATGCGCAATCCCGCAAACATACGCT  
GGCCGATGTAGTTCATGTAATCGATGGCGATCAGATCTTTACTGGTTGTGGACTGGG  
GCTGAAACAATGCTCGGAGGCAAAGCCATGTCCGCTTACAATGAATTTAAAAAGAT  
CCGTGACGCCATTTCAAAATTGCTGCGCACCACCCATCTGGGCGAATTCAGTGAGCA  
GCTGGAGCAAAAACCTGGTTTTCTGAAGCGTTGA

>29

ATGATACTTGCAGAAATACTAGATGTAACCAAATTGAACCCCGGTTAAAACACCCA  
ACCATTTTCCAGTGCTTTGATGCATTGAGCGCCGGTGAACTTTACCATCCTCAACG  
ACCATGATCCCAAACCATTTGATTATCAGTTGCTGGGCGAAAGAGGCAACACCTTTA  
CCTGGAATTACCTGGAACAGGGCCCTAACAGGTGGCGGGTGGCGCTTGCCAAACCG  
GCGCCGGCTGCAAAGGGTGAACCGTAGGGCAAATAGTAGCCAAAGACATCCGCAA  
GGCGGAAGTGTTTTAAAAACTGGGCATCGACTTTTGTGTGGTGGTAAAAAATCAGT



GAAACAGGCATGCGAAGAAGTGGGCATTACCCAGGAACAACCTGGAAGTGGAAATGA  
AAAACTTTGAGGAGAACAGCCGGGAGAAAGCCGGGATAGAATTCAATACCTGGGAC  
CTCGATTCCTGGCCGATTACATCGTGAACATCCATCACAGGTATGTACGCGATAAC  
GCTACGATGATCAAAGAAGTGGTAGTGAAAGTGGCTAACCGGCATGGCGATCAACA  
TCCTGAACTGGTGCATTTGTCAGTAGGCGTACAACAATGCCTGGCAGATCTGTTATC  
GCACCTGGAAAAAGAAGAAGCAGGCTTTATTCCCCTATGTGAAAGAGCTGGTGGCGA  
AAAAGAAACAGGGCGCCAGATTTAAAACCGGTTTCTCCGTGGCATCTCCCGTACAGG  
CTATGGAAACCGAACACGAACGCACAGGCGAAGAATTGCATGCATTTTCGTGAGCTC  
ACCAATGATTATGCGCTTCCTGCCAATGCCTGCAACTCCTACGCCTTTTTTATTACAGCA  
AGCTGCAGGAGTTTGAAGCCGATCTGTTAAAGCATATTCATTTGGAAAATAATATCC  
TGTTCCCAAAGCACTTGGATTGGAACAGGAGCTGGCCGCTTAA

>30

ATGACGGAAAGAGAAAAGAATATTACTTTATTTATCGAGTACAATGGTAACCACCAG  
ACCGTTGAAACGTTTGCGGGCGAGTACCGGAACCTGATGGTACTGATAAAAGATCAG  
GTGTGGGTAGATGGAATGGGGGAGTGTGGTGGCCAGGCCCGCTGCGGCACCTGTAT  
GGTTGAATTGTTGAATGCGGGGGAGAACCTGGTAGTAGCAACCGATACTAAAGAGG  
CTGCTGTTATCAGAAGAATGATGACTACGCAGTCAATCATTTCGTTTGTGCGTCCAGAT  
ACTGGTTGATGAAACCCTGAATGGGTTGAAGATTAGGGTGTGGAACCGTAA

>31

ATGAATAAGCGTCCTGTTGAATTCCTGCCGATTAATAAAAATATTATTGGTAGATGAC  
GATGCCACCGCTAATTATCTTTCAAAGAATTGCTCGAAAGCCTGCAGGCAGCCAAC  
GAATTTGAGACTGCTGAAAACCTGTTTAAGGGCATTGGAGTTGATCAGGCAATCGGAC  
TGTGCCGACGTTATTTTCCTGGATATTAATAATGCCGGGAATAGATGGCTTTGATTTT  
TAGAAAGATTAAAAAAGCTATCGCTCGAAAAAAGATTAAGGTCGTTATGCTTACCA  
GTTCCGTACGGCCCGAAGATAAATTGAGGGCCTTTTCTACAAGGCGGTGATCGAAT  
ACCTGGAAAAGCCATTGACTTCCGAAAAGGTGCAAAATGATAGCAACGACCTACCTTA  
ATTAG

>32

ATGAAAAGAATTATTGCCTTTGTATTATGTATGTATGCTGTTTCCATTCAGGTAAATG  
GCCAGAAAAAGGATTCTGTATCATCTCTTTTACACCTGTGATCGAAAACCTTAATGA  
ACATCCCGATCTATTCGGCCTCCAAAGTTGCTGAATCAACATTTGACGCGCCGCTTTC  
TTCTTCGGTGGTGACCAAAGAAGAGATAAAACGATCGGGCTGTACATCCATCATGGA  
GGCATTACGCCTGGTGGCCGGTGAATTGTGCGGGAACAAACCAATGGCAATTATGA  
TATTCACATCAGGGGGCTCGACAATATTCCGCCAATGCAGGTTTTTTATTCTTTACC  
AGCTCTACTGCGCTGGTAATGATCGATAACTATCCGGTATATAATTATTTACATGGCG  
GCACCTTCTGGGAAACCCTGCCATCGATCTCAATGATGTGGAGAAAATTGAAGTGG  
TCAGAGGGCCTTCTGCCGCTTTATATGGGCCCAATGCTGTTTCAGGAGTGATTAATAT  
TATTACCCGCAAAGCATTGAAAGAAGGGTTGTATGCGGTTGCCAATGCATTGGCCGG  
TAGTTATAATTCGGTCAGTACAAACACTTCGCTGGGATACAACCAGGGCAAATAAG  
CGCCGTATTATCAGGTAATTTTCAAACAGGAACAGGACCCAAAGTACTTATTATGA

CGAACCTGCCAGCAATATGTACCCCTCGATTCCGGTACTGCTGTAAAAAGAAATCC  
GCTGGGCCCCGCCAATATAAATGAAAGATACCCAAACCCGGACCTGGCCATGCGTA  
AGTATGGCGCTAACGGATTTGTCAATTACGATCCGGCAGAAAATATCCGTTTTTCGG  
CAGCATTGGCATCCAGCATTCCGGAGGTGCAGAAAGAATTTGCAACAGATAGCTATT  
CGGCTTATTTAAGTACTGCCAAAGCTGATACCCGGTACGCGAATATAAAAGGTGATA  
TTAATAACTGGCTGGTTCAGCTGTGCTATGTGGACGGAACCTCAATTTCCCTTGTTAGG  
GTTTGACAGGTGGAGATGGCATTATAATACATTCGATGCCCTTGTTGAATATAAAAT  
CGTACCAATAAAAAATTTAAGTGTACCCCTGGCCTATTTACCGGCAGGCTATTTAT  
GATGACAGTAAATATGTAAACACCGCTATAAAAGAAGGCCTATGGAGTGGGCGGGC  
CGAATCTGTAACCAATGCTTTTTCCCTGCGGGCCGATTATAAATTGTTTGATCAACGG  
CTTCGCCTGGTTGGCGGGGCCAGGGCTGATAAATTCAACTATCCCGACAGGTTCTAT  
TATTCCTGGCAGCTGGCTGCCACTTATAAGATCAATGACCGCAACCTGGTGCCTTTG  
TACAATCAAAGGCCTATAGGACCCCGCTTATCATTGATCTGTTTTCCAACCTCGATAT  
CACAGGCCCCCTGGGTGGCAGGACCTATTTGCTTGAAGTTCGGGGAAACAAAAATAT  
AAAAGTCTTACCTCCACCCTGTTTGAAGCAGGATACAGGGTGCAGCCACAGATAA  
CCTGGGAGTTGATCTGGAATTATTCACCACCAAAACACGTAATTTCTCCTACACTATT  
TTTGAAGCGGAACATTTAACCCCTACCGGGCCGCTCGCATTCCAGGGATTGGCTGAT  
TTGAACAATTTGACGGTGTACGCCAAACAATGGGGTGGTACTTTGTCCGTTAATTTTA  
TTGCCGGCGACTGGCAGTTCAAGCCATTTGTTACCCTGCAAAAGACCATGTTGTATG  
ATTATTCTCAATATGCCAATTCACCGGATGCGCCACCCCTTCCATCCAATAACAATGA  
TCCGGCCACGTACAATATTTATTCAGGCATGGGAACAAAAATAAAACACCGGGCTAC  
TCCTGCCTGTTACGGAGGCGCTTACATTAAGTAAAGCCGGTGACCGGTTAAATAT  
CAATCTCAGTCCATGGTTTTATAGCGACCAAAACCCAGTTGGAAAGCAGTAACCTCAC  
TTATAATGATGGTGAGCGGGGTGTTGAACATATTAAGGGAAAGTAATGTTGAATGC  
AGCGGTGAGGTATGCGATTACTAAAAGATCACCTCTCCCTGAGTGGAAGAACTG  
TTTTAACAAACAGGGAACGAGAGTTTTACCGGGCCGATGCGCCGGCATTGATGGTGT  
TGGGGGCGCCAGTTTTGAATTTGA

>33

GTGCCAACTGAGCTTTCAAATAGTGAAAAGGCCTGCTATTGCAGATTATTGATGGC  
GATGCGGATGCGTTTGCAGGAAAGTGTACGACCTGTATAAAGACCGTATTTTTGCCTTTG  
CTTTTACCCTTACCAAATCGAAAGAAATAGCCGAGGAGGCCACCCAGGAAGTATTTA  
TAAAGTTATGGGAACGCAGAAACCAGATAGATACCAATTACCCGCTTACCCCTATA  
TAAAAAAGATCACCTATAACTATATTATTAGTTTTTTTCAGAAAGGTGAACTCGACC  
GGCAGTTGCAACAGAACCTGTATAATAATATGGAGGCGCTGCGCAATACCAATGAA  
GACGAACTGTTGCAAAAAGAAGTGAACAAATTATACCAGCAGGCCATTGAGCAGTT  
ACCCCGGCAAAAACGCACTGCCTACATCCTGAGCCGCGAACAGCATTTAAGCTATGA  
AGAAATTGCCCTGCAAATGGGCATTAGCAAAAATACGGTGCGCAACCACATGACCG  
AAGCCATCCAGTTTATCCGGAACCTACATTAATCATAACCGACTTAGCTTGCCTTAT  
CCTCGCTTTTTGTTTGCACGCGAAAGGCAGGGGGTGA

>34

ATGAGTGGAAGGAACCGTTTGTGGATGAAGAAAAAGCGCTGGCGCAGGCGGCGGA  
AGTCTTTTGGATAAAAGGCTACGAAGCGGCGTCAACGGAAGACTTATTGACTGCCAT  
GGATATGAACAAAGGCAGTTTATACAACGCGTTCGGCAACAAACGGGAATTGTTTGT  
AAAAGTGTTTGAATGGTTTGCAGCGGTTTATCCGCAACATGAAAGTAGTGTTC  
AAAGCATGATAATACAGTTGATGCCATCCGGGAAATATTTCTGCATGTGGCGTATCC  
CGATGATCCGACAGCACATAAAAAGGTTGTTTTTATGTAAATATCCTGGGCGAAAC  
AACCGGTTTGGACCCCGACCTGGAAAAAATTGCCAAAGAGAAGCTGATCGAAATTG  
AAAAGTTGTTCTATAATGAATTGACAAAAGCGCAAAAAGCAGGGCAACTGACCAGC  
GCCATTCAACCGCATTATTAGCCAAACACCTGTTGAATTTGTGGAACGGAATAAAT  
ATTACCAGAAGATTGTACAGCGAAAAGGAACTCGAAAAACTGGTGGAGTTGAACCT  
GCAGCTCTGCTTTGACATGAAATAA

>35

ATGGTGTCTACTTTATCAGAAAAACAAAGCATTATCTCGATCTTGAAGAGCAATAT  
GGCGCTCACAATTATCATCCCCTGCCCGTGGTGCTGGAAAAAGGTGAAGGCGTGAC  
GTATGGGATGTTGATGGCAAACGCTATTATGATTTCTGAGTGGTTATTCAGCCGTAA  
ACCAGGGACACTGCCACCCAAAGATCATTGCGGCTTTTATGTTACAGGCCAGCAAC  
TGACACTTACATCAAGAGCATTTTATAACAACGCCCTGGGCGAATATGCCGAGTTCA  
TCACCAACTATTTTGGTTTTGATAAAGTGCTGCCCATGAACACCGGGGTTGAAGCAG  
TTGAAACAGCCATAAACTCTGCCGACGCTGGGGCTATGCCGTAAGGCATCCCTG  
AAAACAAGGCTACCATTTATTGTATGTAGCGAAAATTTTCATGGCCGTACCAGTACTG  
TCATTTTATTACAGCACCGACCCCTCTTCACGCAACCAGTTCGGTCCGTATATGCCGGG  
CTTTACGGTTATTCCTTACAACGACCTGCCAGCGCTGGAAAAAGCATTACAGGACCC  
CAATGTAGCGGGCTTCCTGGTAGAACCAATTCAGGGCGAAGCCGGTGTAGTATTGCC  
CGCCGACGGTTATCTGTGCGCGCGAAACAATATTGCGAAGCAGCTAATGTGTTGTT  
CATAGCCGATGAAATACAAACCGGCCTCTGCCGTACCGGGCTGATGCTGGCCTGCGA  
CCATGACAAGGTGCAACCGGATATTTTAATCCTGGGCAAAGCATTAAAGTGGTGGTAC  
TGTTCTGTTTCGGCTGTATTGGCAAATGATCCAATCATGTTAACCATTCCCCCCGC  
GAGCACGGTTCAACCTACGGTGGTAATCCGCTGGCATGCCGTGTGGCCGTTGAATCG  
CTTCGGGTTTTAAAGAAGAGAACATGGCTGCCAATGCTATGGCCATGGGTGAATTA  
TTAAGAAAAGAATTACAGGCGTTGGCCTCTCCTTATATTTCCGTTGTTGCGGCAAAG  
GTTTGCTGAACGCAATTGTAATTGATCATGCTGATAAGAACGCGGCCTGGAATTTAT  
GTTTAACTTTAAAAGACAATGGGCTGCTGGCCAAGCCTACGCATGGTGATAAGATCC  
GTTTTGCGCCACCGTTAATAATTAACCGTGACCAGATCATGGAGTGTGTTTCAGATCAT  
AAAAAAGAGCCTGGAAAGTTTATAA

>36

ATGAGATCAACAGTCGCAAACGCAGGGGATAGAACTTGATAGTATTTCCAAATTGT  
AAGATCAATCTCGGGCTTCATGTTGTTAGCAAACGTGAAGATGGTTACCACAGCCTG  
GAAACCATTTTTTACCGTTGCCTTTAAGGGATGCGTTGGAAGTGGTGAAGGCAGAC  
GGCCCTCCTACGAAAAGCTTCGGCGGGCAAGGCAGACGGCAGACAATCGTGAATC  
GGCAATCGTGGATCGGCAATCGACAGAACAATCCGGGCCGGTCGGGCTTCACTTAAG

CGGTCTGATTGTGCAGGGTTTGACAGCAGATAATCTCTGCGTTAAAGCTTACAACCT  
ACTCAAGAAAGATTTTCCTCAACTAGGTGACATCGAACTATAACCTGCACAAGGCTAT  
TCCTATGGGCGCCGGACTGGGTGGCGTTCTGCCGATGGCGCTTTTACCCTATCAGC  
ACTCAACGAGAAATTTCAATTGAACCTAAGCAGCGAAAAGCTGTTGGATTATTCCT  
ACAATTAGGCAGTGACTGTCCCTTCTTTATCATCAACAAACCCTGCTATGCAACAGG  
CCGCGGCGAATTGCTGCAAAGCATAACCACTGGATCTGAGTACTTATTCATTCCTGGT  
AGTGCATCCAGGAGTACACATCAATACAGGCTGGGCTTTTTCACAACCTCTCCCCTGC  
CCCATCACCACAACCTTTACCCGAAATCATTCAACAACCGGTAGCCAGCTGGCGTAA  
TAACCTCAACAACGATTTTGAAGCGCCGGTTTGTAAACATCATCCAGCCCTGCAAGC  
CATCAAAGATGCATTGTATGATGCGGGCGCCCTCTATGCCTCCATGACGGGCAGCGG  
CTCCTGTTTCTATGGCATAATTCCTAAAAATCAACTTCTGCCCTGCAATGGCCTGCC  
CAATACGCTGTATTTGAGGTGAAATAA

>37

ATGGTTTTAGTATTCATAGATCAGGCCGATGGCCATGTAAAAAAGCCTCTTACGAG  
GTATTAAGTTACGGCGCTAAAGTAGCAGAACAATTGGGCACTACTGCCGAAGGGGT  
AGTGTGGGGCGCTGTGGCAGCCGACCAGTTATCGGCACTAGGTAAATATGGGGTAAA  
AAAGATACATCATGTGGCTAATGATACCCTTAATCACTTCGATGCACAGGTTTTTACC  
AATGTAATTGCCAGGTGGCGCAAGCTGCGGGTTCAAAAGTGATTATATTCTCCAAC  
AACGTAGATGGTAAAGCTATTGCTCCCCGCCTCAGTGCCCGCCTTAAAGCCGGACTG  
GTACCTGGCGCTGTGGCTTTGCCGGATACTGCCAACGGTTTTACCGTAAAGAAAAAC  
GTTTTTTCAGGTAAGGCTTTTGCAAATCTTACCATCAATTCAGATATAAAGATCATT  
CCCTCAACCCCAATTCGTACCAGGTGGTTGAAGGCAGCGGATCTGCTGAAGTGGTGC  
CATTTAACGCAACAGTTAATGCACCAAAGTGAAAATAAAAGCGGTAAACAAGGCC  
AGTGGCGAGGTACCATTAAGCGAAGCCGAAGTGGTAGTAAGCGGCGGCGGGGTTT  
AAAGGGCCCCGACAACCTGGGGTTGATCGAAAACCTGGCCCATGCACTGGGTGCTG  
CCACCGCCTGTAGCCGTCCGGTAGCGGATGAGCATTGGCGCCCGCACCACGAACATG  
TTGGACAAACCGGTCTTACTATTGCGCCTAATTTATATATTGCAGTCGGCATTTCGGG  
CGCCATAACAACATCTGGCCGGAGTGAACCGAAGCAAGGTGATTGTGGTTATAAATAA  
GGACCCCGAAGCCCCCTTCTTTAAAGCGGCCGATTATGGTATTGTGGGTGATGCGTTT  
GAAGTAATACCCAAAATAACGGAAGCGGTAAAAAAGCTGAAAGGAATGGCATAA

>38

ATGAAGATCTTAGTTTTGTATCAGCAAAACGCCGGATACCACGGCAAAAATAGCTTTC  
ACCGATAACAATACGAAATTTGCGCAGGACAACGTACAGTGGATCATTAATCCCTAC  
GACGAATGGTATGCACTGGTTCGCGCTATTGAACTGAAAGAAAAGGATCCTGCTACT  
GTTTTACATCTTATAAATGTTGGCGGCGCCGATGCCGAACCGGTTATCCGCAAGGCC  
CTGGCCCTTGGCGGCGATGAAGCCATCAGGGTAAATACCACCAGCACGGATAGTTTT  
TACATTGCGTCGCAAATTGCTGAAGTGGCCAAACAAGGAAACTACGACCTGGTTTTT  
ACCGGTAAAGAAACCATCGATTTCAATGGGTCTCCATTGGCGGTATGGTGGCCGAA  
CTGCTGGATATGCCTTATGTATCGCTGGCTGTAAAATTTGAATTAATGGCACTACCG  
CTATCATCACCCGCGAAATTGAAGGCGGTGAAGAAGTTTGTGAGGTAAATTTACCCG

TGGTAGTTAGCTGCCAGAAGGGAATGGCCGAACAAAGGATCCCCAACATGAAGGGT  
ATAATGGGCGCCCGCACCAAACCTTTAAAAGTGCTGGAACCCGCTGCTGCCGATGCC  
CTCACCACAGTGGCCAGTTTTGAATTACCACCAGCCAAAGCAGGCGTTAAACTGATC  
CCTGCCGATAACCCGGCCGAACCTGGTGCGGTTACTCCATGAGGAAGCGAAAATAATC  
TAA

>39

ATGACCTTACTGCAACGATTTTCAGCAATACATTTCTGACAATCATCTTTTTTCAACGG  
GCGATACCTTACTACTGGCCGTGAGCGGAGGTATCGATTCCGTGGTTTTGTGCGAATT  
GTGCAAACAGGCAGGCTATTCATTTATTATTGCACATTGTAATTTTAAACTCAGGGCA  
GATGAAAGCGAACGCGATGCCGCTTTTGTACAACAGCTTGCCCAAATTACAAGGTC  
CCATTTTAAAGGAAAGAGTTTGATACCGCGTCATATGCGCAAAATCATAAACTGTCT  
ATTCAGGAAGCCGCCAGGGAATTAAGGTATGGTTGGTTTGCAGGGTTGCTGAACCCG  
GCAAACCCCGGCAGGTCGGGGCAGGCTGGCAGACGGCAAACGGCAAACCTGAAACC  
TGAAACCTGGAACCTGGAACCTGGAACCCAGCAATCGGCAATTCACGATTCACGATT  
CACGATTCACGACTTAGAACCGGGAAACCTCAATTTACAACAGCCTACTGTTCTACT  
CACTGCCACCACCTCGACGACAACATAGAAACCATGCTGATGCATTTCTTCCGCGG  
CACCGGCATCCATGGTTTTCGGGGCATGTTGCCAAAAAAGGCCAGATTGTTCCGGCC  
ATTGTTATTTGCCCGTAAACAGGAGTTGAAACAGTTTGCCACCGACAATAATTTGAA  
CTGGGTAGAAGACAGCTCAAACGCACTTGACAAATATTCCCGGAATTATTTCCGCAA  
CCAGCTTATTCCGCTGGTGCAAAATATTTATCCCGAAGCAGAAAATAACCTGGCCGG  
TAACCTGCGCCGCTTTGTTGATATGGAACAATTGTACGAACAGGCCCTTGCCGTACA  
CAAGAAAAAATTGCTGGAATACAAGGGCGAAGAAGTGACATTCCCATCCTGAAAT  
TGCAAAAGTCAGAACCGCTGCATTCCATCGTATACGAGATCATCAGCGGCTTTGGTT  
TTTCGGCAGCCAGGTAGATGAAGTGATTAAGTTATTAGGCAGCGAATCGGGCCGCT  
ATGTACAATCGGCTACCCATCGCATTATAAAAAACAGGCGCTGGTTGATTATTGCCG  
CGGCGCAAACCTGAACAGGCGCAAACCCCTGGCAATAGATGCCGATGAAGACCGGATC  
GTATTTGAAAATGGGGCGTTGGAGTTGACGCAGATAAATAGCAGCAATGTGCAATTG  
GTCAATGACCCTGCTATTGCATTAATTGATCAAAACACCTTACAGTTCCCCTTGTTC  
TGCGCAAGTGAAAAAGGGCGATTATTTTATCCGCTCGGGTTAAAAAAGAAGAAA  
AAACTCGCCGCTTCTTTATCGATCAGAAATTATCCATGACCGATAAGGAAAAAGTA  
TGGGTGCTCGAAAGTAATAAAAAGATCCTGTGGGTGGTAGGCCTGCGGATCGATGAC  
CGTTTTAAAATAACCGGGTCAACAAAACAGGTGCTGCGGATACAGTTTACCGGTTAA

>40

ATGCCTGGCAATATTTTACTCATCGATGATGAAGAACAGCTGCGAAAGTTATTAAGC  
CGTATTATTTCACTGGAAGGTTTTATCGTTGAACAGGCTGGAACCCCTCAAAGCTGCCT  
GGGCGCAGTTGGCTCAAAGGAACCCGACATCGTGTGTGTGATGTAAAACCTGCCGG  
ATGGCGATGGCGTTCGCTTTGTAAAAGAGCTTAAGGAGAAATACCCGCTCATCGAGA  
TTATTTTATTAACCGCATTCCGGCAACATTCGCGATGGGGTGCAGGCCATCAAAAACG  
GTGCATTCGATTATATTACCAAGGGAAACGACAACGATCGTATTGTTCCCTTGCTGTA  
CCAGGCGCTCGACAAAGCCACGGCGCAAAGAAATCGGCGATAAAGATCAAAGACA

AAGGCGCTTACACCTTTGATGATATTATTGGGCAAAGCACGCTTATAAAACAAGCCG  
TACAACTGGCGCAGCGTATTGCCCGGCCAATACCAACGTATTATTATTGGGAGAAA  
CAGGTACAGGTAAAGAAGTATTTGCCAATGCCATTGCAATAGCAAGCGGAGTG  
ATAAAGCCATTGTGGCCATCAACTGCAGCGCTTTTGCCAAAGACCTGCTGGAAGGAG  
AGTTGTTTGGTCATAAAGGCCGGCGCTTTTACCGGCGCCAACAAAGACAAAAAAGGAT  
TGGTAGAACTGGCCGATGGCGGCACGCTCTTCCTCGATGAAATAGGGGAAATGAATA  
TCGACCTGCAGGCCAAACTGCTACGCGTAATTGAAAACGGCGAATTCATAAACTGG  
GTGATGTA AAAACCACCAAAGTAAATGTGCGCATTATTGCGGCTACTCACCGCGACC  
TGAGAAAAATGGTAGAAGACGGTACCTTCCGCGAAGACCTGTATTACCGGTTGAACG  
TTTTACTATCTCCTTACCGGCATTGCGCGATCACACCGACGATATCCCGGCCCTGGC  
CAATCATTTCCTGGCCTATTATACAGCCAGAGAAAACCGGCCGGTTTTACATATTCA  
AAAAGACGCATTGCAGTTATTGCAACAGCATAGCTGGAAGGGAAACATCCGCGAAT  
TACGAAATGTA CTGGAAAGAGCCACTATTATGGCCGAAGGGGATACTATTCTGGCTG  
AAAATCTTCCTTTTGATATTAGAAAACAGGACAAAGGTTTCATCCAGCCTTACCCTGG  
CCAGCGTAGAAAAAGATCATATTCAAAAAGTACTGCGTCATACGAATGGGAATAAG  
ACGAAGACGGCGGTGTTGTTGGGGATAGGGTTAACTACGTTGTATAGGAAGATGGA  
GGAATATGGTTTGTGA

>41

TTGCATTGTAATAATTGTCCGCTGTGCCCTACTAATATTAACCCGGAAATAAAGAA  
AACTTCGGGTAAGGTTAAAACAAGTAAATAAAAATGAGTGCATCTTCTTCACCGGCT  
GTATTCCACAAAAAATCACAGCAGCGGGTATTCTGATCGCCACAGGTATTGTGTTG  
GGCGATATTGGTACGTCTCCTTTATATACATTGAATGCGGTTTTCCATGGCCGCGTTA  
TCACCGAAGATGTTGCACTGGTGCTTTTTTCGGCCATTTTCTGGACACTCTTTTTTCAA  
ACCACGCTTAAATACGTGATCATCACCTGCAGGCCGATAACAAGGGTGAGGGTGGT  
ATTTTCTCATTGTATGCGTTGATCCGCCGTTTTTGGGGCAAATGGTTATTGATCATAG  
CCATGGCTGGTGGCGCCTTCTTAATAGCCGATGGTATTATTACGCCGCCCATTTTCAGT  
GGCTTCTGCTATTGAAGGGCTGGATAAAAATATATCCGCATATGAACACCGTACCTAT  
CGTGATCGTGATCCTTATTGGCTTATTTATCTTTCAACAATTTGGTACGGATAAGATA  
GGTAAGGTGTTTGGTCCCGTGATGGTGGTATGGTTCACCTTTATTGGGGTATTGGGTG  
TAATGGCAATCAGCCATGAGCCTGGTGTGTTTAAAGCCCTGAACCCCTACTATGCCT  
ATGTGATGTTGAAAGAAGTGCCCGGTGGTTTCTGGTTGCTGGGTAGCATTTTCCTTTG  
TACTACAGGCGCCGAAGCCCTGTACAGCGATATGGGCCACTGCGGCAGAAACAACA  
TCCGCGTAAGCTGGATCTATATCAAGATCACGCTGATCCTGAGCTATGGCGGTCAAA  
CTGCCTGGTTGTTACAACACGTAGGCCAGGAAGTTGGTAATATAAGCCCGTTCTATC  
ATATAGTGCTGATGCCATCTACCTGCCTTCGCTGGTAGTTGCTACGATGGCTACCAT  
CATTGCCAGCCAGGCGCTGATAAGTGGTTGCTTTACCCTGGTGAATGAAGCCATTTCG  
CCTGGATATATGGCCACGTCACCGGGTTTTGTTCCCGGTCATATTAAGGTCAGATC  
TACATTCCTTTTGTGA ACTGGTTGTTAATGGCCGGTTGTTTAGGCATGGTGTACTACT  
TTAAAGAAAGCTCCAAAATGGAAGCGGCGTTTTGGGTAAAGCGTTACATTGACCATGT  
TGATGAGTACCGTGCTGATCAATTTCTACCTGCATGCCAAACGTGTAATGGAATCC

TGATAGCACTGGTTACCGGTTTGT TTTTGGTGATAGAATTGTCGTTTTTGACGGCCAA  
CCTGCAGAAGGTAAAAGAAGGTGGTGGATAACGCTGCTGATCGGTTCCGCCCTGTT  
TTTGGTGATGTACATATGGCGGAGAGGCCGGGCCATTACCAATGGTTTGAAGAAAAT  
GGTGCCGATAGAAACCTATGTTCTTTATTAAAGGAGTTGAGCATTGATGAAAAGAT  
CCCTAAATACGCCACCAACCTGGTTTATTAAACCAGTTCCGGTTCGCCCCGTAAAGTA  
GAAAAGACAGCCATCAATTCTATTCTGTCTAAAAAACCCAAACGGGGCCGATATCTAC  
TGGTTCGTACACGTAAACGTACTGGATGAACCGTACGCCATGCGTTACCATGTTGAC  
ACGATCGTTAAAGACGACGTGTACTTTGTGGAATTCAATTTGGGTTTCCGGATAGAG  
CCGCGTATTGACTATTATTTTCAACAGGTAGTGAACGAACTGGTGAAAACAGGTGAA  
GTGGATCTGTGCAACCGGAATGAACAACATTACCAGGATAGTAAGATCGGTGATCTC  
CGTTTCTGGTTATGGAAAGCTTCTGTCTCGGAGAAATGCGATGTCGTTCTGGAAAA  
ACTTTGTAATGAAAAGTTATTTCAACCTGAAATGGCTGAGCGTTAAGGAAAGCATCA  
ACTTTGGTCTTGACCCGAGTAACGTAACGTAGAGAAATATCCGGTGGTAGTGAATG  
CAGTGCAGCACCCGCCGTTGGAAAGGCAATAA

>42

ATGAATACAGAACTCTTTGGTGTAATAACACCTTCCTTTAACCGTGCTGCTCGCGT  
GGCCATTGGGAAAATACATTGCCAGAGTATTTAAAGGCGAACGCACCATCACCGATT  
TTATGAACCCGGTTGAACGGTTCATCTCCGGGTATCCGGAATAAATCCCAACGCCA  
GCATGGACTGAAACAATTTCTGAAAGCCATGCTAAGTATAAACCTATTGTGGTTTG  
TATATGCATTTTTTGTCTTATTGTTCCAGGACAAATTACCGCTGAACCCCGATGGCAA  
CCCTGCCCAAACACCTGACCTGGCTTTTAACACCCGCCATCAGCTTTTTGGTAAACTGT  
AACCTGCAGCACTATTCCGGTGAAACAGGATTAACCTTATTTACCCAGTTAGCTGTG  
ATTACATTCTTACAGTTTGTATCGGCAGCTACCGGTATTGCCGCTCTGCTTGGTTTATT  
AAACGGGTAAAAGAAAAACAACCAATAACCTCGGCAACTTCTGGAACCTGCTGG  
TTAAATCCATTACGCGTATTTTACTGCCTCTTTGTATAATAGGGGGTATAATAATGGC  
CTTTAATGGCACTCCAGCCAGCTTTGATGGAAAAGACAGTATTGTTACGCTGCAGGG  
CGATTCCGGTACAGGTTTCTCGTGGGCCCGCAGCCGGTATGATCGCCATCAAACACCT  
TGGCACTAATGGAGGCGGCTGGTTTGGCGCCAACTCAGCCCATCCACTGGAGAACCC  
CAGCTACTTTACCGCCATGCTGCAACTGGTGTATGCAGGTGGTTATACCCATCGCTATG  
ATCTTTGCCATGGGTTTTTACATTCAACGTAAAAAGTTTGCTTACGTAATCTTTGGGG  
TAATGACGATAGGGATGTTATGCCTGCTCATTCCCACCATTGTTACCGAAATTCATGG  
CAACCCCGCCATAGCCAGGTTGGGCGTTACCCAGGCAACGGGCGCTATGGAAGGGA  
AGGAAGTGCGGTTTGGCCCTGCCTTATCGGGTACTGGAGCATCGTTACTACCATCAT  
CTCGACCGGTTCCGGTAAACTCGATGCACGACAGTTCGATGGCCATTTCCGGACTGAT  
GCAATTACTGGCCATGATGATCAATGCCTTTTATGGCGGTTGTGGAGTAGGGATCTT  
AAACTATTACATCTACATAATTATCGCGGTATTCATCTCTGGATTAATGGTTGGCCGT  
ACACCTGAGTTTATGGGCCATAAAGTAGAAGCAAGAGAGATCAAGATTGCCTCCATG  
GTATGGTTGCTCTCGGCCATCCTGGTTAAAGGCGGTGCAGCGTTTGCGGCCTATATG  
GTAGCGCATACCCCGATGTGGCCTGGGCGGTA AACCCCTCAGCCTGGTTAAACAAT  
CCTTCGTACCACGGTTTTTCTGAAATGTTGTATGAATTCACCTTCGGCGAATGCCAACA

ATGGCAGTGGGTTTGAAGGATTGGGCGATAACAATATATTCTGGAATGTAAGTACTG  
GTATCGTGCTCATCCTGGCCCCGTTTATCCCCATTATTGGTCCGCTCGCTATTGCCGG  
TTTGCTGGCCAATAAGAAATTCATTCCCGAATCGCCCCGGAACGTTGCGTACCGATT  
GCTCACCTTTGGTGCTATGACCTTTGCCGTGATCGTAATTGTAAATGCATTGTCTTTCT  
TCCCGGCCCTGGCATTAGGCCCGATAGCAGAATATTTCTCATTACAATAA

>43

ATGTCAAAAAGAAAACGCGAAATAAAATTGTTTGAACCGGCGCTGGTAAACACTGC  
CATCAACAATCTTTTATAAAATTGAGCCCCCGTTAATGGTGAAGAACCCGGTGAT  
GTTACTGTGGAAATTGGCACCATTGTGATGCTGGCAGTGGTGATGTATCAAATAAT  
TACGCATGATGCTACGCAGGGTGCCCTGTGGTACAATATTGTAGTATTTGCCATTTT  
TTCCCTACCGTGTTGTTTGCCAACTTTGCCGAAGCGCTGGCCGAGGCAAGAGGTAAA  
GCCAGGCCGAAAGCCTGCGCAAAACAAGGGAGGAAACACCCGCTAAAAAAGTAAT  
TTCCCCTGGCGATATTTTCGTAAAAGAAATAAAAGTAGTACCGTCCTCACAACTTCG  
GTAAACGACCGGTTTGTATGCGAAACCGGTGATGTAATACCTATGGATGGGGAGAT  
CATTGAAGGAATTGCCACCATAGATGAATCAGCCATAACCGGTGAGTCTGCGCCGGT  
GATCCGCGAGTCGGGTGGTGATAAATCATCGGTGACCGGTGGTACCAAAGTGCTTAG  
CGACCGTATTGTGGTACAGGTAACAACCCAGCCGGAGAAACGTTCCCTGGATAAAAT  
GATCGCGCTGGTAGAAGGCGCCAGCCGGCAGAAAACACCCAATGAAATTGCATTGA  
CCATTCTGCTCGCCGCCTTTACACTTATTTTCATCATCGTGTGCGTAACGCTGAAACC  
ATTTGCCGATTACGCCAATACACCTATTACCATTGCCGCATTTATATCCTTGTTTGTGT  
GTTAATCCCCACTACCATTGGTGGATTATTATCCGCCATTGGTATTGCGGGAATGGA  
CCGTGCATTGCGTGCGAATGTGATCTCTAAAAGCGGTAAAGCCGTTGAAACCGCGGG  
TGACGTGGATGTGCTGTTGTTGGATAAAACAGGCACCATCACCATCGGTAACAGAAA  
GGCCACTAATTTTTATCCGGCCAGGAATGTAGAAGAGCATGAATTTATTGACCTGGT  
TGTGTATAGTTCATTGGCCGATGATACGCCGGAAGGAAAATCGATCGTTGAACTGGC  
GGCAAACAAGCAGCCCTGATCTTACCCTCGATCAGTTCGGTCATCAGAAGTTGGC  
GGTACAGGCAGCGCCCTCACTTTTATCAAATTCAGTGCAGAAACGAGAAGCAGTGG  
AGTTGATTTCCCTAATGGAACAAAGATCCGGAAGGGCGCCTTTGACGCAATACGCAA  
CCTGGCCATGAAAGCCGGCAACGGTATGCCCTTGGAAGTGGAAGACCGGGTAAAGA  
AGATCTCCGGCGATGGCGGTACCCCGCTTGTGGTATCGGTGGATAATGTAATAAAAG  
GCGTGATTGAATTACAGGATATCATCAAACCCGGGATCCAGGAACGGTTTGAACGTT  
TGCGTAAAATGGGTGTAAAACGGTAATGGTTACCGGTGATAATCCGCTTACAGCAA  
AGTATATTGCCACTAAAGCAGGCGTAGATGATTTTATTGCCGAAGCAAACCGGAAG  
ATAAAATGAACTACATCCGCAAGGAACAGGCAAGCGGTAAACTGGTGGCCATGATG  
GGTGATGGTACAAACGATGCGCCCCGCTGGCGCAGGCTGATGTGGGCGTAGCCAT  
GAACAGTGGTACCCAGGCGGCAAAAGAAGCCGGTAACATGGTTGACCTGGATAACG  
ACCCACTAAATTGATTGAGGTAGTGGAGATTGGTAAACAGTTGCTGATTACCCGTG  
GTACCTTAAACCCTTCTCCATTGCCAATGACGTAGCCAAATATTTTCGCTATCGTTCC  
GGCCCTGTTTATTGCTTCTATTCCGGCCCTGCAACATTTGAATATAATGGGTTTGAAA  
AGCCCCGAGTCGGCTATCTTATCAGCCATCATTTTCAACGCCATTATTATCCCATGC



TGATTCCCCTGGCATTAAAAGGCGTTGCGTATAAACCAATAGGCGCCAGCGCCCTGT  
TACGCAGAAACCTGTTGATCTATGGTGTGGGCGGCGTAGTGGTTCCGTTTATAGGTA  
TCAAGCTGATTGATATGTTGCTGGCAGTTTTTATGTAA

>44

ATGAAAACTTTCTTATCTCCATAAAGCTCACTCTCGTCCTGATTGTTCTTTGTGCCCT  
GGTTTTCCCGGTACTCATTGCCATGGTTAGCAAAGTGGCGCCAGGCGGTGGTAAAGG  
TGAAACCGTAATGACGCACGGCCGGGTCGTAGGCTATGCAAAGTTGGACAAAAT  
TACTGCCGATAAATATTTCTGGGGCCGCCCTTCGGCAGTGGATTATAACGCTGCCG  
GTTACAGCGGGTTCTAACAAAGGACCTTCCAACCCCGATTATTTAAAAACCGTGCAGG  
ACCGCATCGATTCTTTCCTGGTGCATAACCCCGGGTTAAAAAGAAGAGATCCCTG  
CCGAGATGGTAAACGGCATCGGGTAGTGGCCTCGATCCTGATATTTACCGGCATCGG  
CCCTGATCCAGGTTAACCGCGTAGCCGCTGTACGCAGAATACCAGCCGGTAAAGTAA  
AGGCGCTGGTGGAGGAACATACTGAAAAGCCATTTCTCGGTTTACTGGGGCCATCCA  
AAATAAATGTGTTGAAGTTGAATGTAGCGTTGGATGAGCTAAGGTAA

>45

ATGAGTGTTTCTAACGATAAAGAAGACCAGGTGCAGCACTACCTCGACCTGGCTAAC  
CAGTCGGTTCGTGGCAAAGTGAAGATCTACATCGGCATGAGTGCCGGTGTGGGTAAA  
ACCTACCGGATGTTACAGGAAGCGCATGACCTGCTTCGGAAAAATGTAAACGTAAA  
GGTGGGTTATGTTGAAACACATAACCGGAAGGAAACGCATGCGTTGATAGAAGGCT  
TACCGCTGATACCGCGGCGACAGGTCTTTTACAAAGGCAAACAGCTGGATGAACTGG  
ATGTGCAGGCCGTATTGTTGCTGCATCCCGAAGTGGTGTGATCGTGGATGAACTGGCGC  
ATAGCAATATACCGGGTAGTAAAAATGAAAAGCGCTGGCAGGATGTGGTAGACATC  
CTCGATGCCGGCATTGATGTGATCACCGCGGTAAATATTCAGCATATAGAAAGCATC  
AATGTAGAGGTGAAACAAATAACCGGGGTAGAAGTAAAGGAACGGGTGCCCGATAA  
GTTATTGCAAATGGCCGATGAAGTGGTGAACATCGACCTTACCGCCCGGGAATTGAT  
TACCCGGTTGCAGGAAGGCAAGATCTACGATCACATAAAGTACAGCAGGCGCTCA  
CGAATTTCTTTCAACCCGAAAAGATCCTGCAGCTGCGTGAGCTGGCGTTGAAGGAGG  
TGGCGGGCCAGGTAGAAAGAAAGGTTGATTATACCGTAACCAAAAACAAAACCTGG  
CAGCATGAACGCTTCCTGGCCTGTATTTCAACCTCACATGAAGCGGCCAGCGTATT  
ATTCGAAAACCGGCCCGCCTGGCATCGTACTACAATGCAAAGTGGTATGTTTTATAT  
GTGCAAACACCCCATGAAGAGCTGGATAAAATACCGCTGGCTGCCAACGGCATTG  
ATAAATAACCTGAAACTGGCTACTGAACTGGGCGGTGAAGTAGTACAGGTAAAAAG  
CAAACACGTTGCAAACGAGATCATTCAAACCGCCATCGATAAAAAGATCACCACCAT  
TTGTATCGGAAAACACATTTGAATTTATTTACAGGTAATTTTGAGGACAAGCTTATTC  
AACCAATTGCTAAAAACCCTGTCTGAAAAGATATTGATATTATTATATTATCGTAA

>46

ATGGAACGCCTTTTAGAAAACATTACAATCTTTTGCACATGTCGCCACGCGCCAG  
GACGTGGTAAGGCCGCTTTTTACGCCGATGGAATTTAAAAGAGGCGAAACAATGATC  
CGCTGCGGGAAAACCTGCCAGAGTTTGTATGTTATCGAGCAGGGATTTTGCCGGGCT  
TTAATATCCAGGATGGGCTGGAGGTAAATCTCAATTTCTATTTTGAGTACGAAACG

GTGACCCATAAGAACAGCTATGTGTTCAATACCCCGGCCGATTTTGAGGTAGTAGCC  
TGCGAACCTATGATCGTTTACCGCATTGATAAACCAGACCTGCTGAACGCCATCCGG  
CAATGCCCCGAATTGGGCGAGGCGGGTAAAAAGAACCTGGAAGTATAGCCGCCAA  
ACAGGAACGGCAGTTGCAATTGTTTCAGGATCCTGACCGCAAAGGCCGTTATGAATT  
TTTAGAGCAGCATAATCCCGCATTGTTACAACGGGTACCCATCTCCCAACTAGCTTCC  
TACCTGGGCGTAAAACGCGAAACCCTGAGCCGCATCCGCAACAAAAGAATGCGCCC  
GGTATTTTGTGA

>47

ATGCAGCGTAGCCGATATTCATTACTCGTTATCAGTATCCTGTTTTGTCAGTATTCCC  
TGTTTGCACAATCTGCCAGAATGCGGGAAGACTTTGATAATAACTGGACGTTTCATT  
GGGTGAGGCAGCCAATGCCAAAGCCTCTGAATTTGATGATGCCTCGTGGCGCAA  
GAACCTGCCGCACGACTGGAGCATCGAGTTGCCATTTGATTCAACCAGTCCTACCAA  
TAACAGCGGCGGTTGTTTACGCGGCGGGCTGGGCTGGTACCGCAAACATTTACCGT  
ACCGGTACCGACAAGGGCAAGATCATTTTTATAGATTTTGACGGTGTATACCGCAA  
CAGCGAAGTGTTTCATCAACGGGCATTCGCTGGGCATGCGGCCGAATGGATTTATTC  
TTCCGCTATGAGCTCTCCAATTTTTGAATTATGGCGGTAAGAACGTGATTGCTGTA  
AAAGTAGATAACAGCCAGCAGCCAACAGCCGCTGGTACAGCGGCAGCGGTATTTA  
TCGCAATGTATGGCTGGTAAAACCGGTACTACCAATATTGAAAACCTGGGGAACCTA  
TGTAACACACCCTCGGTGTCTGCTTCTCTGCAAAGGTTACTGTAACCACTTCATTA  
ACCGGTACCGGCGAATATTGTGATGTTACCACCACCATCCTAATGCCGCTGGCGCT  
CCTGTTGGCACCCAAACACAAAAAGGATTGCACATCGGTTTCATTACAAACCCTGCCG  
CAAACATTCAGTATAGGATCACCTGTTCTCTGGAGCCTGGAGAATCCCTATCTGTAC  
AAAGCGGTTACCAAGGTAATGAGCAAAGGAAAGCTCACCGATGAGTATAACCACTAA  
CTTTGGCATTTCGAGTTATAAATTTGATGTGGACAAAGGATTTTTCTCAATGGAAAA  
CAGGTGAAAATTGTTGGGGTATGCAATCACCACGACCTGGGTTGTTTGGGCACAGCC  
ATCAATACCCGGGCGTTGGAGCGGCAATTACAGATCCTGAAAGGTATGGGCGTAAAT  
GGCATTTCGCACCTCGCATAACCCACCTGCGCCTGAGTTACTCGACCTCTGCGATAAA  
ATGGGTTTTATTGTAATGGACGAAGCCTTTGATATGTGGAAGCACCGCAAGGTAGAT  
TTCGATTACAGCAAAGACTTTGACGAATGGTATAAGCAGGACCTGAAAGACCAGGT  
GCTGCGCGACCGCAATCACCCCTCGGTATTTATCTGGAGCCTGGGCAATGAAATTC  
CGAACAACATGGAAAAGACGGCGATACTACCGGTATGGCTTTGCTGCGCGAAATGC  
AACGCATCGTGCGCAGTCTCGACGACCGGCCAACCGTTACCGCCAACAACCATACAG  
ACGATAATAACCAGTTGCTGAAATCGGGCATCGCTGACCTGATCGGTTACAACCTATA  
ACCAGGGTATCTGGATGCCAGAACATGTACAAAAGAAATGGGGACGCAAACCGTTC  
ATCGTAACGGAGTCGGTATCGGCCCTGCAATCAAGGGGGCATTATGATCAGCCGTCA  
GACAGCATGCGGGTTTGGCCCCAACGCTGGGATGCTCCCCTCAAAGGCGCCAATGCT  
GACTTTACCTGTTTCAGCTTATGAAAATTGTTATACGCCCTGGGGATCGTCTCATCTGA  
CTACGTTAAAAGCGTTTTTAAAATACGAAAGCGTAAGCGGCATGTTTGTGTGGACGG  
GTTTCGATTATATAGGCGAGCCAACACCATAACCCCTGGCCGGCCCGTAGTTCTTATTT  
TGGTATTGTTGACCTGGCCGGGTTCCGAAAGACGTTTATTATTTGTACCAGAGCCTG

TTCACTACCAAAAATGTCTTGCATTTGTTCCCGCACTGGAAGCTGGAAGCCCGGACAA  
ACAATTGACATGTGGGCTTATTACAACAATGCCGATGAAGTAGAGCTGTTTCATAAAT  
GGGAAATCGCAGGGTATAAGAAAGAAAACCGGTGATGACCTGTATGTGATGTGGCG  
CGTGCCGTTTGAAGCAGGCAAGGTAGAAGCCATCTCAAAAAGAATGGAAAAGCAG  
TAGCTACCCAGGTGATAAAAACAGCCGGTGAACCCGCGAAGCTAATTGTACAGGCC  
GATAGAAGCGCCATTAAGGCGATGGAAAAGACCTGTCGTTTGTAAACGGTAAAAGT  
GGTAGATGCAGCCGGTAACTGGTGCCCGATGCTGCTAATGAAATTCAGTTTAAAGT  
AAGCGGAGCCGGGTTTATTGCCGGTGTGATAATGGTTGTCAAACCAGCCTGGAGTC  
ATTTAAAGGCAGCCAGCACAAAGCATTCAATGGCTTGTGTTTGGCCGTAGTGCAATC  
AAACGGAAAACCGGGAGTTATAAACTACAGGCGCAGGCAGCAGGATTAGCCGGTG  
CAAGCATCGATATAACGGGTAAGTAAATGAATCGATTATCATCAACCATTGTATGCG  
CAATCCTTTTCCCGCACTTGTGGCGCCTGTAAAAAGT

>48

CAGCAACACAAACTGAAGCAATGCAACAGGAACGACAGGCCAGCACCGAAGCCACT  
CCTACCAGCGGCTGGACGCAAACATCCTATACCTACAGCATTCAAACACCCTGGAAC  
CTGCCTCAATCTGACCGGTATAGTTATTCTTCCGGCGAACATCATTCTGGATTTATA  
ATGGAGATGCCTGTCAATTTGAAGGTTGTTCCACCGGGCCCCGTTCAGAATTACGGA  
TGAACAATGATTATACTTCAGGCAGGCACCAGTTTGAAGGCGATGTATATATAGTTT  
CAGGCTCAGACGGTACAGACATTATGCAGGTATTTGGCGGCGTTACCAATGCCACCT  
CCCTTTTGCTTAAAATTAAGTCTGCTGCCAGCAGTGGCACCATTAAACGCTACGACAATG  
AAACTTATGACCAGCGCGTACAACAATGGATCCATGTGAACGTGCAACACGAT  
GCCGACAATGGCAAATATATGTGTACCTGAACAACACGTTAAAAGGCACTTTTGCA  
GACAGGGGCAATGCAAACCATTACTTCAAATGCGGCGTGTACAATATAACAGGTTCCG  
CGTCTGAAACCCGTTGGAAAATATCAAGTACTGGAAAACCGCCCCGGTAGGCCA  
GTAG

>49

ATGCAGCAAATTGAATACGAACTACATACTGACCAGAATCTGTTGCAACAGCTTTCG  
CAAACGATCAGGCTGCCTTTACCGCCATTTACCAACGTTACTGGAAAATACTTTTTC  
GCGAAGCCATGAACGTGCTTCGCTCCCAGAAAGAAGCAGAGGACTGCGTGCAGGAA  
CTGTTTGTTCCTTATGGAACCGCCGCCAGAGCCTCGCCATTACCACCCTGCGGGCTT  
ATTTACAAACTGCCATCCGCTATCAGTGTATCGACCGTATTGAGCGGAATATGATCC  
ACGGAGGGTACCTCGAAGATTTACCACTTACATGGAAGCGAACCAACCATGCCTT  
CTATTGAAGAGGAGTTGTATGCCCGCGAACTGGCCGCCAGTATTGACCAGGTAATGG  
ATAAAATGCCCGATAAAATGCGGGAAGTGTTCGCCTGAGCCGGCAGGAGCATTTA  
ACACACCGGGAAATAGCCCAACGTTTGCAGATCTCTGAAGAAACGGTAAAAAAGCA  
GATCTATCTCGCCCTCAAATACTCAAATCCAACCTGGGCAATACTTCCCTGGCCATG  
CTCATCCTGGCCACTTATGTATTTAAATGA

***Fluviicola taffensis* coding sequences for codon usage calculation.**

ATGCTTGAATCAACTTATTTTAAAGGTACAGTTTCCAGAAGATCTTCATTTGAAGCAGT  
GGTTAACGGAAAGAGATGGAGAAATTCGAATTGGCCAAAATGTTCTTTTTTCGCTCCG  
TTGCTGGTTTAGAAGGTTGGAAGGAAAAGCGTTTTTCATATTATCGGAATTAAGGAAG  
ATATTGGTCCGCGTTTTGAATGCGGGAAAAGGCGGTTCTGATTTAGCATTGATGCTTT  
TATCACTCGATTCCTGGCTGTTCAATCCAATCAATTTTTGAGCGGAAATTCTATTTGC  
ATACATGGATACATTTGTTTAAAAGAATCGATCACAGCAATTTCAAATATGCATGTT  
GATGACTTAGATTACCTGGTGTGATTTGGGTTTCAGGAAGTTGTTGAAGCTGGAGGA  
ATTCCAATCGTAATAGGAGGCGGACATAATAATGCATATCCGATTATTAAGGTGTT  
TCAGAAGCTATGTGTCAGCCAATTTCTGTAGTGAATTTAGATCCTCATGCGGATACA  
AGAGCTATGGAGGGCCGGCATTACAGGAAATCCATTTTCATACGCTTTTGAAGATGGT  
TTTTTGAGAATTATTCGGTCCTTGGCCTCCATGAGTCGTATAATAATCAGTTTATTCT  
AGATCGCTTGCAAGAGATGAACGCCTTTTTTACGTTTTATGAATCGTGGCTTGAAAA  
GAGTTTTAAATCCAAGCAGATATTGATAAAGTGTACGATACGCATTTTCAAGATTT  
GATGGGAGTAGAGTTGGATATGGATGCAATTGCTTACATGCCTTCAAGTGCATTTTC  
ACCCTCTGGAATAAGTGTGGACCAAGCTCGAATTTATATCCGAAAAATGGCTTCTTT  
GGAAAAAGTGTGTTACTTACATTTGCCTGAAGCAGCACCTAAAAATGAGATGGAGG  
AATTAGTTGTTGGCAAGGCTTTGACTTATTTGGTAACAGATTTTTTAAAGGAATATCT  
GAAACATCATCATTAAATGGCTGAAAATCAATATACTGAAGACAATATACGATCTCT  
TGATTGGAAGGAACATATTCGACTAAGACCTGGTATGTATATCGGGAAATTAGGAGA  
TGGTGCTTCTGCAGACGATGGGATTTATATTTTGGTGAAGGAGATTGTCGATAATTCC  
GTGGACGAATTCGTTATGGGGAATGGAAAACGTATCGATATCAAAGTGAAAGATGG  
GAAAGTTTCTGTTTCGTGATTATGGACGTGGAATTCCATTGGGGAAAGTGATTGAATG  
TGTTTCTCAGATCAATACTGGTGGAAAATACGATTCCAAGGCCTTTAAAAAATCAGT  
TGGACTAAATGGAGTAGGAACCAAGGCTGTAAATGCGTTGAGTGATTATTTTATGGT  
TTATTCGGTGAGAGAAGGACAAAAGAAACAGGTTGTTTTTCTAGAGGGGAATTAAC  
CGAAGATTTGCCTTTGAGTAAAACAGATGAGGTGAATGGAACCTATTTTGAAGTTTATT  
CCTGACGAATCCATCTTCAAGAAATTCGCGTTCAAGATGCCTTACCTGATCAAGATG  
TTTTGGAATTATTGCTACTTGAACCGCGGTTTGGCGATTTACTTCAATGGCGAAAAAT  
ACCAATCGAAAGACGGGTTGAAAGATTTGTTGGAAGATAATATGGATGGAGATCCA  
TTATATCCAATTATTCATTTGGAAGGTGACGATATCGAAGTTGCTTTTACCCATGGAA  
AAACATACGGAGAGGATTATTATTCCTTTGTGAATGGTCAGCACACAACACAGGGAG  
GGACGCATCAAAGCGCTTTCCGTGAGTCCATCGCAAAGTGATTCGTGATTTTTTACA  
AGAAAGATTACGATGCTTCAGATATTCGTCAATCTATCGTTGCTGCAATTGCCGTGA  
AAGTAATTGAACAGTATTTGAATCTCAAACAAAACGAAATTAGGTTCTCAGGAAA  
TTGAACCAGATGGAAAATCCATGCGAGCTTTCATCAATGATTTTCTGAAGGATAAAT  
TGGATAATTACTTGCACCGTCATCCAGATGTTGCGGATACACTTGAAAAGAAGATTA  
AGCAATCGGAGCGCGAACGCAAAGAATTGTCAGGAATTCGTAAACTAGCTCGTGAT  
AGAGCGAAGAAGGCGAGTTTGCATAACAAGAACTGCGCGATTGTAGAAGTCATCT  
AACTGACTTGAAAGATGAAAAACGTGAAATGACTACGCTTTTCATTAAGGAGGAGA

TTCAGCGAGTGGATCAATTACCAAGTCAAGAGACGTCAATACACAAGCCGTTTTCTC  
ATTGCGCGGGAAGCCTTTGAATTGCTACGGATTAACCAAAAAAGTGGTTTATGAGAA  
CGAAGAGTTTAACCTCATTCAAGCTGCTTTGGACATCGAAGAAGACATGGATAACCT  
GCGCTACAATAACATTGTAATCGCAACCGATGCCGATGTTGATGGAATGCATATTCG  
TTTACTTCTCTTGACGTTCTTCTTGCAATTTTTCCAGATTTAGTGAAGCGGAATCATG  
TTTATGTACTTCAAACCTCATTATTCCGTGTTCGAAACAAGAAAAAGACGATTTACTG  
TTATTCCGATGAAGAACGCCGAGCAGCTATTTCTGAATTAGGGAAAAATCCAGAGAT  
AACTCGATTTAAAGGATTGGGAGAGATTTCCGCCAGATGAGTTCAAGCATTTTATTGG  
TGATGATATTCGTTTGGAAACCAGTTCTCTTAACTAAAGATGCATCCATTGATTCGATT  
CTATCTTATTTTCATGGGGAAAAATACGCCAGAACGCCAAGATTTTATCATTGAAAAC  
TTGCGTGTGTGAAAGATGATGATAAGAATGTGGATCTGGAAGATTCCCAATCAGAA  
GATGAAAATACAGAACCAATAGAAAAAGCTTCTTAAATGAGTGAAGATGAAATTGG  
ACCGGTAGACCCGAAAATGAGAATTTAGATAATGATAACAATGGAGATGAAGGTC  
AAGAATCTCCGATTCAAGTCTTTTGAGAAAAATCATGTAGATGAAAATATCATTC  
CACTAAGTGGTCTGTATGAGAATTGGTCTTTGGATTATGCTTCTTACGTAATTCTTGA  
GCGCGCTGTTCCCTCTTTACACGATGGTTTTAAGCCAGTTCAGCGACGAATTCTACAT  
TCCATGAAAGAATTGGATGACGGACGTTACAACAAAGTCGCGAACGTAATCGGAAA  
TACCATGAAATATCACCCGCACGGTGATGCGTCTATTGGTGATGCCTTGGTTCAACTC  
GGACAAAAGAATTATTAATCGATTGTCAAGGAACTGGGGAAATACGTTGACGGG  
TGATGGTGCAGCTGCTCCTCGTTATATCGAAGCGCGTCTTTCCAAGTTTGCTAGTCAT  
GTGGTTTTTAATCCAAAGACTACAAGCTGGCTATTGAGTTATGATGGTTCGAAACAAA  
GAGCCTGATAATTTGCCCGTAAAATTTCCAATCTTGCTTGCTCAAGGTGCTGAAGGA  
ATCGCTGTCGGAATGGCTTGTAAGATTTTGCCGCATAACTTCATCGAATTAATCGATC  
AGTCGATCAATCATTTGCGCGGAAAGAAAATTGAGATTTTTCCCGATTTTTTTGAATGG  
TGGAATGGCGGATTTTACCAATTACAACGATGGTTAAGAGGTGGAAAAGTGCGTGT  
TCGAGCTAAGATTA AAAAGGTCGACAATAAACATTGATAATTAATGAAATTCCTTT  
TGGTTGCACAACGACTTCTTTGATTGAAAGCGTTATAAAAGCAAACGACAAAGGGAA  
AATTAAGATTA AAAAAAATTGAAGACAATACGGCTGCAGATGCAGAAATTGTGATTC  
ATTTGGCTCCTGGTGTCTTCCAGATAAAACAATCGATGCTCTTTATGCGTTCACGGA  
TTGTGAAGTATCGATTTCTCCAATGCTTCTGTAATTGATGGTGATACTCCTCGATTT  
ATGGGAGTAACTGAGATTCTGAAAGTGAATACAGACAATACTGTTACTTTACTTCGA  
AAAGAACTCGAAATTCGATTGGCTGAATTGGAGTCTCAGTGGCATTTTTCAACGTTG  
GAAAAAATCTTCATTCGCGAAGAAATGTACATTGATTTTAAGTTGTATTCAGACAAA  
GAAGGTTTGTATCAATACATGTACAAGCGGTTTGAGAAATTCAAAAAGCAATTTGTT  
CGTGAGATCATAGATGAAGATTTACAGCGTTTGACTCAGATTTCCAATGATTCGTATT  
ACACGTTTCGATT CAGATAAAGCAGACGACTTGATAGCAAAGTTGGAGGCTGAAATG  
GAAGAGGTGAAGAAACATTTGGGTAATTTAATCGAGTATGCTATTGAGTATTACAAA  
GATTTAAAAAAGCGTTTTGGAGCTGGTAAAGAGCGAAGAACTGAAATGAAAGTTTTT  
GACAATATTGCTGCTTCGAAAGTAATTATTGCCAATCGAAAGTTATATGTAGATATC  
GAAGAAGGATTCATTGGTTGGGGCTTGAAAAAGACCGAAGCTGTCAATGATTGTTCT

GAAATTGATGATATTATTGTTTTCTTCGATACCGGAAAATTCATTGTTACAAAAGTTT  
CTGAAAAGAAATTCGTAGGCAAAGGGATTGTACATGCTGACGTATGGAAAAAAGGC  
GATAAACGCACAATCTATCACGTAATGTATCAAGATGGTGCTGGTGGAGCAACAATG  
ATGAAACGGTTCTTTGTGAATTCAGTAACGCGTGACACCGAATACGATTTAACACGA  
GGAATCAAAGGATCTAAGCTCTTGTATTTCTCCGTTTCATCCAAATGGAGAGCGCGAG  
GTTGTTTCAGTAATGCTCCGACCAAGGCCACATTTGAAGCGTTTACGGTTCGATATTG  
ACTTGGGAGATTTGCTAATTAAGGTCGCCAGTCTGCTGGAAATCGGGTTACAAAAG  
AAATTGTTCAAAGATCACTCAGAAAAGAAGTTGGAGGTTCCACATTAGCCGCTCGTA  
AGATTTGGTACGATACCGTTGTTGGAAGATTGAATGACGAAGGAAGAGGGAAATTTT  
TAGGCTCGTTCAAAGGAGAAGATCGGATTATGACTTTGTATAAGAATGGAGACTACC  
GATTGACTACTTTCGATTTGGCAAACCACTTTGATGAAGACATGATCCATATTGAAA  
AATGGGTTCCAGACAGACCAATTTCTGCTGTTTATTACGATGGAGAGAAGGATTTGC  
ACTTTGTGAAGCGGTTTACTTGTGAAATCACAACAGATAAGAGGGTTTCATACATTT  
CTGAAACAGAAGGATCTTATCTAGATTGTGTTTCTACAGCATAACCAGCCAGTTGTTTCG  
AATCGTTTACAACAAGCTTTTAAAAGAAACGAAAAACCTTCCAGATAACGAGGTTGC  
TTTGGCTGATTTTCATCGATGTGAAAGGAATGAAAGCGCAAGGAAATCAACTAACGA  
AATTAAGTCAAGGAGGTTGTATTAACACATGAAATTGAAGGTTCTGAACCTTGGC  
CAAATGAAGACCCATTGGAATTGGAATCGATAATTCGGAAGAGGATTTGGACGGA  
GAAGATTCGGAAGATGGAGATAATCCAACAATTGAGTGGGACTTGACAAAAGGCC  
TGATGATCCAGATGATCAACCAACATTTGTTTAGATGAGTGCCAACCATGACGCTAT  
TTGGAATTCCTGTCTGAAAGTTATCAAAGACAATTTGCCGATTCAAGCTTACAAAAC  
TTGGTTTCGAGCCAATTGTACCAGTTAACTAGAAAACAACGTTCTGACAATACAAGT  
TCCATCTCACTTTTTTACGAATGGTTGGAAGAGCATTACATTACTTTATTGAAAAA  
GTAATTAAGAAAGAACTCGGGCAAGAGGGACATTTAGAATATAGCATTGTGATGGA  
AAATTCTGCTAGTAATCAAATCCTTACACGGTGAAACTTCCAGCTTCCAACAAGAA  
AGCGGTTAAGAATGCACCTATGAATATGCCTTTGAACATCAGTGACAATCCAATTA  
GAATCCGTTTATCATTCTGGACTAAAGAAAGTAAATGTTGATTCAAACCTGAAATCCT  
GCATATTCTTTGAAAATTTTCGTAGAGGGTGATTGCAACCGTTTGGCTCGTTCTGCTG  
GATATGCGGTAGCAAATAAACCTGGAGGAACAGCTTTTAACCCGTTGTTAATCTACG  
GCGGAGTTGGGTTAGGAAAAACGCATTTGGCACATTCAATCGGTATTGGTGTGAAAA  
ATCAATTTCAAACAAAACGGTACTTTACGTTAGTTCAGAGAAATTTGCGCACCAAT  
TTATAGATGCAGTTCGTAATCAAACCTACGAATGATTTCAATTCATTTTTATCAAATGAT  
TGATGTTTTAATCATTGATGATGTGCAGTCTTCTCTGGAAAAGAAAAACACAAGA  
CGTATTCTTCATATTTTCAACCATTTACACCAAAATGGAAAACAAATTATTTAACT  
TCGGACAAACCGCCAGTTGAAATGCAAGGAATGGAGCAACGTTTGTGTCTCGTTTC  
AAATGGGGATTGTCTGCTGACCTTTCAACTCCTGATTTAGAAACGCGAATTGCTATCA  
TGAAAAGAAAATGTATGGTAGTGGTATTGAACTTCTCGAGAGGTTGTTGAATACT  
TGGCATAAGTATCAATACAAACATTCGTGAAATGGAAGGCGCTATGACTTCCCTAC  
TTGCTCAAGCTTCTTTAAATAAAAAAGCAATTACGCTTGATTTGGCGAAGCAAATGA  
TTGATAAGTTCGTGAAAACACAGCTCGTGAAGTTTCTATTGATTACATCCAAAAG

TGGTATGTGATTATTTGCGACTTGCCAATTGAGATGTTGAAATCAAAAACACGTAAGC  
GTGAGGTTGTTCAAGCTCGTCAAATTTCCATGTACTTCTCTAAGAAAATGACTAAATC  
ATCATTGGCTAGTATTGGAGCACATTGTGGAGGAAAAGATCATGCAACAGTTCTTCA  
TGCTTGTAGAACGGTTTTGAATCTTTCAGAGACAGACAAACAATTCCGAGTTTACTTG  
GAAGACCTTGAAAAGAAATTGACTATTCAATAAATGAAAGAAATCTATTCACCATTT  
ATTTTCGGAAATACAGTAAGTACAGAAGCATATACGAATCGAGAAGATGAAGCATA  
TAGGTTAAAACAAAACCTTAATGGGTGGAATCAGTACGATTCTTATTTACCCGCGTAG  
ATGGGGGAAATCGTCTTTGGTAGAGCGTGTTATTAGTGATATCAATCAATCCGAAAA  
AAAATGCAAAACAGTGTTACTCGATTTGTTTACTGTCAATAACGAAGTAGAATTCCTT  
GAGTTATTTACACGTGAAGTGATTAAGGCGACTTCTACCAAATGGGAGGATTGGCTT  
GCCGATACTAAGAGTTTTTATCCAATTTAGTGCCAACAGTTAATGTTGGAATTAATC  
CTCATTTAGATTTCAATATTAATAACCAACACGAAAAAGTACACGAGTTTGCAGATG  
AAATTTTGAACCTTCCTGAGCGAATTGCAAAAGAAAAAGGGATTCTGAATGGTGATTT  
GTCTGGATGAGTTTCAGAACCTGACAAATTTAGTAGGTTACGAGCCGCTAGAAAAGA  
AGATGCGCGCAATCTGGCAGCGCCAAAAATTAGTTTCATACTGCCTTTTTGGAAGTA  
AACGACACATGTTGGAGGAAATATTCAATAATCCATCGAAACCTTTTTACCGCTTCG  
GAGATTTAATGTTATTGCCCAAATCAAAGAAGAAGCTTGGGTAAATTCATTCAAT  
CAAGTTTCAAAAAGACAGGTAAACAAATTTCAAAGAGATCGCTACGATTATCCCGC  
GTCTGATGAAAAATCATTTCGTGGTACGTACAGCAATTGTCTCATTATGTCTGGAATCA  
GAGTCGTTTGGAGTCTGTGGATAAACAAGTTATTCAAATTGCACTAACGGAGCTCAT  
CTTTGCCAATCAACCTCTCTATCAAAGAGAGATAGAAGGGATGAGCACAACCTCAAT  
CAACTTGCTGAAGGCCATTCATCAGCGGGAAAAACAATTGACATCAACCGATGTTAT  
GCGCAATTATGGATTGGGAACACCTAGAAACGTTTCGAAAAACCGATTGGTTCTCGA  
AGGTCGAGACATGATTTTGAAGATGAAACGGGAATCTATGAATTTTTAGATCCAGC  
TTTTGAAATTTGGTTCGGGAAACATTATTTTCAGACTCCATGGGAAGTGGATTTTTG  
CTGAATAATAAGTGGGCAAAATTGATCAAAAACGAACACTTTTTATTTCTTAACTTT  
GTAATTATATCCAAAATCAAATTAGTCGTGAAAAAAGTTCAGTTTTCTAAGCCTCAG  
GGCGAATTCTTTTCTCACTGAGAAAATCGGTTCAGAATTATTTTGATGAAAATCAAC  
TAGAACTTCTGGAAATTGGAAATTGATTTAAAGACAACCATCATTATCACAAAT  
ACATTGCTATTTATTGTTCAATCATGTTGCTTCCAATTCCAGGATATGTTGCGCTTCT  
TTATCCGCATCATTAGGATTTGTTTCAGGCATTGGTTGGTTTTAATATCATGCACGATG  
CTAACACGAAGCTTTCTCTAGCAATAAAAATGTCAATTATTTCTTTGGTCTTTCCAT  
GAACGCTCTGGGAAGTGATGCATTTATGTGGAAACAAAAACACAATTTAGTTCACCA  
TACTTATACGAACATTGATGGAATTGATGACGATATTTTGAAGACTCCATTTTTACGT  
ATGAGCGAAACACAACACGTTATAAGGCACATCGTTTTCAACACATTTACTTGCCA  
TTCTTGATGGCATTCTACTATTTACTGGGTTTTGGTAAAGGATTTTCAAGATTATAT  
TACAGGTTACGTTTCAATGTAGAGGTTGGAAAGATGAAACCAATTGATCATGTGAT  
GTTTTGGACAACGCGTATTATCTATTTCCGGTTGTATTTGGTTCTTCCATCGTTTGT  
GGGAATCGGTTGGACTATTCTTGGTTTCACGTTGATGCACATGATGCTTGGATTAAC  
GATGTCATTTGTTTTTCAATTGGCTCATGTGGTTGAAAATGTGGAATTTGAACACGCA

GAAGATGAATCATTGATGGTTGAAAATGAATGGGCTGTACATCAATTAGCTACAACG  
AGTGATTTTCGCGGTTGACAACAAATTAGTAAGCTGGTTAGTTGGCGGCTTGAAC TTT  
CAAGTTGAACATCACCTTTTTCCACGCATTTACATGTTTATTACCCAGAAATTCAGA  
AAATTGTAGCAAAAACCTTGTGCTGAATTTGGAGTTACCTACTATTCATACACAAGTA  
CTGGTGAAGCAATAGCTTCTCATTTTCAGACACATGAAACGTTTGGGGAAAGAATAAA  
TGGTAGCAGTAGACAAATTGTCATCAGAGGAATTGATGCAATTAGAAGATCGTTATG  
GAGCGCACAAATTATCATCCGCTTCCAGTCGTTCTTGCAAAGGAGAAGGGGTTTATG  
TTTGGGACGTTGAAGGAAAAAAATACTTTGATTTCCCTTTCAGCATATTCAGCTGTA  
TCAAGGGCATTGTCACCCGAAAATTGTAAGCATTAAACGGATCAGGCTCAAACATT  
GACCTTAACCTCACGCGCATTTTACAACGATACATTGGGTGTTTATGAAAAATTCGTA  
ACCGACTATTTGGTTTCGATAAAGTTCTTCCAATGAATACGGGGGCTGAGGCAGTG  
GAAACGGCTATCAAGATTGCGCGTAAATGGGGATATGAAAAGAAAGGTGTTGCTGA  
AAATCAAGCGCAAATTATTGTGTGTGAGCAAAATTTCCACGGTAGAACAACAACCAT  
CATCTCTTCTCGAGTGACCCGGATGCAAATACCAATTTTCGGACCGTTTACTCCAGGA  
TTTATTTCGTATTCCATACAATGATCTAGACGCATTAGCTGAGGCAGCGAAACAACCA  
AATATCATCGGTTTTTTAGTAGAACCTATTCAAGGAGAGGCTGGAGTATATGTTCCC  
GCAGAAGGTTATTTGGCTGGGGCAAAGAAATTTGTTTCGAAGAATAATATTTGTTT  
ATCGCTGATGAAGTCAAACCTGGAATTGCACGAACAGGAAAACCTATTGGCTGTTGAT  
CATGAAAATGTAACCAGATATCTTAATTCTTGGAAAAGCAATTTTCAGGAGGAGTT  
TATCCAGTTTCTGCAGTTTTTGGCAATGACAATATCATGATGGTGATCAAACCAGGTC  
AACACGGGTCAACTTTTTGGAGGAAATCCATTGGCGGCAAAGTGGCGGTTGCTGCAT  
TAGAAGTCGTGAAAGACGAAAAATTAGCTGAAAATTCTGAACGATTGGGGCAATTA  
TTCCGAGCAGAAATGAATCGTATCATCGAAAAGTCGGATTTGATTCTAAAAGTGCGT  
GGAAAAGGATTGTTGAATGCAATCATTGTAATGACACAGAAGATAGTAAAACCTGC  
TTGGAATTTGTGTGTGGAATTGAAAAACAACGGTTTGTGGCTAAACCAACTCATGG  
AAATATCATTTCGCTTTCACCACCATTGGTTATGACCGAAGAGCAATTGATGGAATG  
TGTGCAATCATTGAAAAACGATTCTTGAGTTTAAAGAAGTAAATGATCAAACAGAC  
AAGTGGTTTCACTGATAAAATAACCAATTCAGGAACAGAACAAGCTATTTCCATAC  
TATTTTTCAATCAGAAGAGAAACCTCTAAAAGCTACCATACTTATCTTACATGGAAT  
GCAGGAGCATAGCGGGCGTTATATTGAATTTGCAAATTTCTTGCTGAAAGCGGATA  
TGCTGTTTTGACTTATGATCATGCAGGACATGGGAAAACGGCAGCTTCCAAATCTCA  
TCATGGTATTTTCATTCAAACAATGCTGCCAAACGCGTAGTAGATGATGCCGAAAA  
AATGGCAGAGTTACTTGAACAGGAGTTTCCATCGATACCGCATTTTGTCTCGGGCAT  
TCTATGGGATCTTTTATAACAAGATGCTTGCTACAACAAGCCCATCATCGATTTGATG  
GTGCTATTATTGTTGGAACAGGTGGAAAGCAAGCCATTGCTCCTATAGCCCGATTTG  
TATTTTCTATCCTAAACACACTGACTCCTCAAAAAAGGAGCATAAAACTTAATCGTTT  
TTTTAATAATTTGAACAATAAACGTTTCAAAGGTGATTCATCTGAAACACGCTGGCT  
AAGTGTGAACAAGGAGAATCAACGCGCTTTTGTGAAGGATGAACTTTGTGGCATTCC  
ATTTACCAACAATGGGTTTTCACACCTTACTCACATTAACATCAAATCAAACAAGAAA  
TGATTGGGCGAGTAACATATCCAAGAACTACCATTTCTATTTGTAAGTGGCGCAGA



AGATCCCATTGGGGATTTTAGCAAAGGAGTTACTAAAACGGTTGAAAACATGAAGA  
AAGAAGGATTTTCAAATACCAGTTTATTGCTATATCCTAAAATGAGGCATGAAATTT  
TGAATGAAGATATCAAACATCAGGTTTTTCAAGATATCCAAAACCTGGTTGGATGAAC  
GGTTGGTCTAAATGAAACGAAAAAAATAGTCATCATAGGTGGTGGCTTTGCGGGTC  
TAAATCTCGCTCGTAAATTGGCTAAGTCCGATTGTGAAATAATTTGGTGGATAAGC  
AAAATCACCACATGTTTCAACCGCTATTTTATCAAGTGGCAAGTGCACGCCTGGAAC  
CTTCAAGCATCTCCTTTCCATTTTCGAGCAATTTTTAAACGAAGGAAGAATGTGGAATT  
TCGGTATGCGACAGTAGAACTTATTCGACCAGAAGACAATATCATTGAAACTTCCAT  
GGGTGAAATTGGGTATGATGAGTTGATTATTGCAACGGGTGTAAAACAAATTTCTT  
TGGGAATGCGGAATTGGAAAAGCATAACCATGGCTATGAAATCTACTCAGCAAACGA  
TTCACATTCGAAATACAATCCTCACGAAGTTCGAGAAAATCATGTTTGTGGAAAATA  
AACAGGAACAAGATGAATTGATGAATTTGGTGATTGTGGGTGCAGGTCCAACAGGT  
GTAGAGCTTTCTGGAGCTTTTGCCGAAATGAAAACCAAAGTGCTACCACACGATTAC  
CCAAACTATGATTTCTCTCGATTAATAATTTTGTGGAAAGGAAGTCCGAATACAT  
TGAATGCCATGAGTGATAAATCGCGCGCTTGGTCTCGTAAATATTTGGAAGGAATGG  
GAATCGATGTCAGAACTTCAACAGTTGTTTCCACGTTTGATGGACATAATTTAACCTT  
AAAAACAGGAGAGGTAATCCCTACTCAAACCTGTGATATGGGCGGCTGGCGTTCAAG  
GAAATGTATTGGCTGGTTTAGAAAAAGCAACGATGGTTCGTGCTCGCTATATGGTTG  
ATCACTTTTCAAAAATTGTAGGTTACGAGAATGTGTATGCTATTGGTGATATTTCTTA  
CATGGAAACTGAGAAATATCCCAAGGACATCCACAATTAGCAAACGTAGCAATCA  
ATCAAGGAAGAGTACTAGCGAATAATTTCCGTGCAAATGGATTGGAAAAAAGCAA  
GTTGCATTTGAATACAAAGACAAAGGAACCATGGCAACCGTTGGAAAACACAAGGC  
TGTGTTGAATTACCAATTTTAAATCCAAAGGGTATTTGCTTGGATGGTTTGGATG  
GTACTTCACTTAATGCTCATTTTAAAGTGTCCGAAATAAAATTGCGGTTTTCTTCAACT  
GGGCTTGGAGATACTACTGGAGATACTTCTTTGCGTTTAACTTGGAGAGATGAAC  
GGGATCGGGATAACATGAGACGAAATGATTGAATGATTAATATTTGTATCATAGAAG  
ATATATTGGATATCCAACAAGGATTGCGATCTGTCATTGAAAGTGATGACCGTCTAC  
AATGGGTACGTTTCGTTTGAACCGCTGAAGAAGCCATTGAGTGTATTCCAAAGCTGA  
AACCAGATGTGGTGATTACGGATATTAATTTGCCAGGTAAGAATGGAATTGAATGTG  
TTTTTGAATTAAGAGTATTGATTCTGAAATTCAATTTATCATGTTTACCATCTATGA  
AGACAACGATCAGGTTTTTGAAGCTTTAAAAGCAGGAGCTACTGGGTATATTCTCAA  
AAACTAATCCAGACAAGATCATAGAAGCCATTTTGGAATTACACGAAGGAGGAA  
GTCCTATGTCACCCAAAATTGCACGAAAAGTCTTACAATCATTCAATAAGGCAGAAA  
ATCCTGTTTTACAATTAATCTCAAACGGGAAAGAGAAGTACTTGATTTATTGAGTA  
AAGGTATTTATATAAGGAAATTGCGGATAAATTGAATATTACATTGAGCACTGTAA  
AGCGTCACTTAAATCACATTTACGAAAACTTCAAGTTCAAACAAAACCGAAGCGG  
TGAATAAGCTTTATGGGAAGTAGATGATCAAAGTACTTTAATTGATGATGAAAAC  
ACTGTTTGATAACCTTAGAGTTTATCTTAAAACAACCTGGATGAAGTTCAAATTATTGG  
AATGGTTCAAAACAGCAACGACGGTATCAAATTGGTAGAGGAATTCAATCCGGACA  
TCGTATTTCTAGATATTGAAATGCCGAATCAAATGGATTGATTTCTTAGCTCAATT

TACAACCATTCCATTCAAAGTTATTTTCACTACTGCTTATGACCAATATGCCGTGAAA  
GCTTTGCGTATGAATGCATTGGACTTATTGAAACCTATTGATAAAACAGATTTAA  
TTCAGGCATTAGACAATTACAAAATCGAGAATCAGAAAATCACTGATGAACAAATCC  
AAAACCTGCATTTGTTTCGAAATGGTAAAATTCAAGATACGATTGCTCTTTCCACTCA  
ATCTGGGTTAATCTTCATCAAAAATCGAAGAAATCATGTATTTAGAAGCGAGTAGTAG  
CTATACTTATTTGATTATGAAAGATAAGACGAAGCACTTGGCAAGCAAACCATGGC  
AACTTTGCAAGATGTTTTGATAGACAATCCAATCTTTTTTCAGAGCTCATAAATCACAT  
ATTGTCAATTTGAAAAGCATCAAACAATACATTCGTGGAGATGGAGGTGAACTAATC  
CTAGAAGATGGAAAAGTCCGTTTCGCTAAGTCGTAGTAAAAACAAGAATTTTTAGAA  
CTCTTTATGAAGATTTAAATGAAACATTGGTTTTGGATTCTTCTTTTCATTACTCCCTT  
TTGCAATGCTCAAGATAATGCGGAATTTCCATCGTTTTCAGTTTACTCCTCTTTCCATC  
AATGAAGGATTGAGTAATCGCATTGTTTATTCAATTTTCGGAAGACCAACGTGGATCT  
ATTTGGATTGGAACAGCGGATGGATTGAATCGGGTTGATGGTAATCAGATTCAATCT  
TATTTTTTCAGTCAAAGAAATCCAAGCAGCATTTGCAATAACGCTATTAAACATTTTT  
ACCAGGAATCAAATTTTCATGTGGATTGGAACAGAAGCCGGGGTTTCTATTTTCGACC  
TAAAAACTGGACGTTTTTCAAACCAGACCCTCAAACAAGTACGCTCCATTGG  
AATTTAACACAACCTTTATAAAGACAAGTAAGCAGTTTTGGATTTTAGGTCAACATC  
ATTTTTACAACTCCTCTCTTCTCAACAAGTAAAACAGTTTGCTTATGAGGGTTCTAA  
GAAACTGGGAATTCAGTAAACAACGCATTGATTTTGCTTTTCACGATTTGAATCA  
ACAAATTTGGGGAGTTTCTGGAAGTAGAATCGGACATCTGAATCCCAATAATTTAAA  
TTTCGTAGCTACTATTGCTGTTGGAAATGACAAGAACGAAGGAATTACAAATGTTGT  
CCCTTCAAAAATGGGCTTTGGATTGGGACTTGGGGAAATGGGCTATTTGCTTATGA  
TTCGAATCTGAAGAACTTACTAAGCTTCGACTTACTGCCCAATTATTCATGACATC  
GCTTCCTATTCTGATTCAAAGGAAATTCATTTCTTCTTGCAGGTACCAACTTGGGAT  
ATGCAATCGTCAATACTTCCACTGGACAGTTTAAAGAATTCGAACTTGATACAGAAG  
TCAGAAATGTGTTTGTGATTCCAGAAACACCCTCTGGTTCGGCACAGATCAAGGCG  
TTTATTTTGCAGCAAGCAAAAACCTGGAATTCAAACGCTTCAATTGTCTTCACTTGT  
AAATAACTCTTTAAGTACACACATTGATTCCAAAAGACTGATTGGATCGATTAGTTC  
AACAAATACCAACTATTATACTTCTCTGCTCTATGCAAACGGATTCTTGAAATTCGAC  
AAAAACTGGAAATTTGAAGCGTATATTCCTTCTTTGGTAAAAGACTTGTGCAAACT  
GCTTTCAGAGATATACGGCACATTTTTGAAATAACGGACCATTATTGGATTTGTACCG  
ATGCTGGTTTTGGTCAAATGCCAAAAGATTTCAAATTCCTCAAATCATTCAATTGC  
CGTTCAGTAAAAAGCAATCCAAGGACGCACTTTATTCAAAGAATAATCCCTACA  
AAACGAATCAGTTTCTAGTTCGCGGAGACAAATTTATTGCAATTTTCAACTGGAAAA  
CACAGCAATTCAGCTACATTGCCACACGAATTCTCTGAATAACACAATTCCAGATG  
ATTTGATTGTGGGACAATGTCTGATTGGAACAAATTGTATGTTGCTTCAGAAAATTA  
TTTATACTTCAATTGATCTCCATTCCAAAGAAATTAAAAAATCATCTTTCCGTTTTCA  
GGAAAACGCATCAGCTCTTTTACTTCTTTGAATAACTCTTTGTGGATTGGGACTCAA  
CAGGATTAATTGAATATCGTTTGGCATCTAGCACTTCCACGCTTATTTTCGTTCTGA  
TGGATTATCTAGCGATAATATTTTGAATTTGGCTTCCAATCATAAAATTACGTTATGG

ATTGCTACAGCAAAAAGGCCTTACAGCATTCAATGTATTTACAAAAGCATGCAAAATT  
TATCAGAATAAGGAAGGAATTTACAGACGAATATATGGAAGGTGCTTTGTTCTTTGAC  
GAAAAGAATCAATGTGTTTTTTTCGGCAATAGATAAAAATTTCAATTTTTAGATCCTAGTA  
AATTCAAAAAATCGAAAAATCAGCAAAGAGTATTCATCACAGAAATTACAGTAGGA  
AGTAAAAAAGTCCTATGGAAAGAATTCCACAACCTTAAAATCACTTGTTGTACCTTAT  
TCTACAAATGATCTAAGCATTGATTTCACTATTCCAGCATATTTACCCGATTCAAAAAG  
ACAATCTTACTATTATAAAGTAAACAACCAGTGGAAAAAACTCAATTCGAGCGTTC  
TGGAGCTATCAAATCTTCCCATAGGGAAGACATTTGTAACCATTGCTTCAAATCCTCA  
AGAATCTATTTTAAACGATCAATTGCTGATCACAATTTATCCTCCATGGTATAAGACT  
TGGTGGTTCATGGGAATCTGTATCCTTGTCTTTGGGTTATTGATTGCAAATATGATTC  
GTTTTAGAGTAAACCAAAGCAATAGAAAGTTTCAAGAAAAGGAACTCATTCAAAAT  
CAAATTCGGGATGCTGAGATGAAAACACTGCGTCTCTCAAATGAATCCGCATTTTTATG  
TTCAATGCATTAAACTCGATCAACAGATTCATTATTCAAACGACAGTGAACAAGCA  
AGCAATTATTTAACTACGTTCTCCAAACTGATGCGAAATATCTTGGAAAATTCAAAA  
AAAGCAACGATTTCACTCAAAAAGGAAATCGACTCTTTGAGATTGTATCTGGAATTA  
GAAGCAGCACGACTGGAACACAATTTGATTACTTTATTGCTATTGATTCTGACATTG  
ATTCTGAATTTATAGAATTGCCTCCACTCATTTTACAACCTTTCGTAGAAAATGCTAT  
TTGGCATGGTATAAATAATCTACCAACACGTGGTAAAATTTAAAATTGAAGTGAAAAA  
GAATGGTTCAGAATGCATTCAAATTGATATCAGCGACAACGGAATTGGAATCGAGAT  
GTCAAAAAAAATTAACAAAATCAAACAAATCACAAATCCTACGGAATAGAAAACAA  
CCATTCATCGCTTGTACTTACAAAACGCTGAAAATTCATTTCTATTATCAACTTATC  
GGACGAAGCGGGATTAAGCAAAGGAACACGAATTAGCATCTTAATACATCACTAAA  
TGAAAAACAACTTTTTCTAATCGGTTTTCTTGTTTTTGTAACCTATTTGTCATTTCGCT  
CAGTTGAAATCGGGATATGACAAAATTTGAAGCAATGGAACCTTAAAAGTCAATTTTC  
CGTTTTGCAGACTCCACTGCTTGGGATTCTATGCCTGGTCCAGAACGTTTTGAATTGA  
AATACCGTTCAAAAACAGTTGGGTTGACAATAAATGGGATTACTGGGAAGATAAA  
GCGGGAGTAGGGTTTTGTCTTTAAGAGGAACAACGGGTACTTTTTTCGAGTTGGGGA  
GCCAATTTCTATGCAGGAATGGTTCCTGCAAAGGTTGGATAAAAATAGGAGAGAA  
GGATACGTTTAAATTACGAATTGTCAAAGATCCAAAAGCTTTGGTTCATGTAGGTTG  
GACAACTGCCTTGGGTTGTATTTGGAAAGATATTGATTCTTTACTTTTTGCTCAAATC  
GATCAAGGAAAGAAAGAGTTTTACATTACAGGTCATAGTCAGGGTGGGGCTATAGC  
GTATTTGTTGACTGCTCATTGCTAATTATGAAAGAAAATGGATTTATTCTGCGGAT  
GTTCAAGTTTAAAACGTATTGTAGTGCCGCTCCAAAACCAGGGAATTTATATTTGCTT  
ATTACTACGAAAAAATGACTCAGGCTGGTTGGGCTTACAATACTGTGAATTCGTTAG  
ATTGGGTTCTGAATCTCCTTTCTCGGTGCAAACAGTGAATGATTTCAATACCGTAAA  
TCCATTTAAAATGCCAAAAAGCAATTAAAAATTTGCCTTTAATTCCTCGAATAGT  
AGTGAAGCACATGTATAATAAATTGAATAGACCAACGAAGAAATCGCAACGTCAAT  
TTGAAAAATACTTGGGTCGGAAAGTGGGAAAATTAATGACCAAAAATTTAAAGGGT  
TTTGAACCACCTCAATTAGCTCATTCAACTGACTTCACCCGATGTGGAAATTTTATTG  
TCTTGTATCCTGATACAGAGTACTATCAGAAATTTCCCAAGATCCGAAAGTTATTTT

CGGAAATCACATGTTGGAACCTTATTTGTTGTTGTTGGAAAAGTTGCCGGAATAAAT  
GAGAAAACAATTTTACGCGGGCTTTTTAGTAGTATTTTTCGGAACATATTATGCAATT  
GGTCAACAAAACACATTGCAGGTTGTTGGAAAAAATCTTACTTCGATAAATGGTCAA  
AACATTATTCTTCGCGGAGTTAATTATGGATTAATTAATCAAGGAGATATCTCCTTAG  
CTGATGCTGCAGGCTATCAAAGTTATATTGATGAAGTTGCAAATACAGGTGCAAATG  
CTGTTTCGTATTCCCTGGTACACAAGCGGACAAAACCTGGAGAGATATTCCTGGTCCAC  
CAAACAATGGAACACCTGGAACCTGTTCGATGGATATGTTACAAATGGACATTTAAGTA  
ATATCATCGCTACTGCATTTGAAAAAAATGATCCCAATTTTGAGTATTCACGATGA  
TTCTTACATTACTTGTAAGATAAATTGGGCTTATTTTAATTCAACAGTAATGGATTTTT  
GGACAGATCCCGATGTATTAACACTCATTGAAGCTAATAAAGCTTATTTAATTATCA  
ACTTAGCGAATGAATTTGACAAAGTAAGATGGGGCGCTGGTTCACTGGCAACGGAGT  
TAAACACCTTTAAATCCAATTATTCAGCAGCAGTTGCTACACTTCGTCAAGCTGGTGT  
GAATGTTCCAATCATTATCGATGCACCTGATTGCGGGCAATCTTCTACCGAGCTTTTA  
TCCATTGCTGTAGACATGAATCAGAACGATACACGACACAATTTGATTTTCTCTTCTC  
ACGCTTATTGGTATGGATATGCTAGTACACTCGCACAAAGTTCAAACGAAATTGAACG  
AAGCTCAAACACGAATGTTTGTTTTATTTGGGGGAAGTTGCAACCAATCAGGATG  
GCGACAACGGCGAATGCGGGCTCAATGACCTATCAACTCTTTATCCAATCATATTAG  
ATGAAGTCTGTTCTCGGAATATTGGCTGGTTGGCGTGGACTTTTAGTTTGGATTGTTT  
ATCAGCAAGAGAAATGTCGCCACAGGCTCAGCGTCGAATCTCACGACTTTTGGCAA  
TGACATTATTAACAATCCCAATTACGGACTAAAATCGACGAATGGTTGTGGAGCTGT  
AGTAATTGACGAAAGTGTGGAAATTGATTCAAAAACCTAGTCAAGTTTTTAGTATTGA  
ACCAAATCCTGCTTCTACAAATATTGCCATTCATTCTGCTTTTTCTAATTGCAGCCTA  
AGCATTGCAAATGCATTAGGAGAACTAGTTCTAACAGAAAAACACACTAAAAATTCT  
AACGTTTCAATAGCTGATTTTAATCCTGGAATTTATTTTCGTAGAACTTGAAAATTCTC  
AGCAAACACATATTCAAAAATTGATTATCTATTGAATGAAACAAAACCTTACTTAGTG  
CTATTTGCCTATTACTTCTTCCATATCTTGCTTATTCGCAGACAGAAAAACAACCTTGA  
CTCTATCATTCAAGTTTGTTCAAAAATGAAAAACGACACGAATAAAGTCATTTTTCA  
AAACCAAATTTCTTGGAGTTTTAAGTATTCTCATCCAGATTTAATGGAAAAATTGCTT  
CGCGATAACATTCAGCTTTCAAAGAAATTTAAATTCGATTCAGGAACAGCCTTGGCT  
TACAAAAACCTCGGAATTCTAATGGATGAAGCTGGAAACATGCCTAAATCCATTGAA  
AATTACCAGCTCGCCATTCGTTACTATAAAAAGGCGAATGATGAAATGGGCGTTGCA  
AAAAGCGAGGCTAATATTGGGATTTTACC GCGATTTGAAACGAAATACAGAAGCC  
ATTGCAAAGTTTCGAGAGTCCAATAAAAATATTTATCAAAAATGGATTTTTTACAAGGA  
CAATTAATCATTATGAAAATTTGAGTATTTGCTACGAATTCATGAACAAATTGGATT  
CTGCCACTGTCAACATTAATAAAGCCATGGAAATTATGAATGAGCTTAAAACCTGTAG  
ACCCCATGTTTACGGGAATTACGCCAATATTTTCATGAAACAAAAAAATTATCCGA  
AAGCCATCGAATACTATGAAAAAGCAATTGAAATATTGGGTTTCAGATTCTCGGGGAA  
TAACTTGGACAGATAATTTAGGTCTGGCTTACTACTATCAAAAACAATACCCAAAAG  
CATTGCCACTCTTTATAGAAAGCATTGAAAATTCGCACACAATCTACAACGCAAATA  
CGATGGCAACTCACATGCATTTAGCTAATTTGCATTATGCCATGAAGGACTACAAAA

GTGCATTTGATATTCAGCGAACTTACTTGGAAATTCGAGATTCAATTTTTTCAGTAGA  
AAATTCGAAGCAACTTTCAGAACTAACGAAAAAATACGATTCTGACAAGAAAAAA  
TTCAAATTGAGAACCAAAAAGAGGCAAATCAAAAGCGAGCAAACCTCAAAGTACATC  
TTTGCTGGCAGCATGGTCGTTTTTATTGGATTAGGATTTTTATTATTTTCGCTCGTTAAA  
ACAAAAAAACAAAGCAACCAAAAATCATCTTAGAACAAAAGAATATTGTTGAAAATC  
AGAAAGATGCTTTGGAGTTTAAGAACCGAGAAATCCTAGATTCCATCACGTATGCAA  
AAAGACTTCAAGATGCCATTCTTCCTGCGGTAGATTATTGGCACAAAACACTTCCAG  
AAAGTTTCATTTTGTACAAACCGAAAGACATCGTTGCTGGCGACTTTTATTGGCTGGA  
AAGCCATACTGTTTTCTAATGGTACAAGTTCTGACGAATACTTGTCTTCGCAGCAGCC  
GATTGCACAGGCCATGGGGTTCAGGAGCAATGGTAAGCGTAATCTGTTGCAATGCA  
TTGAACAGATCTGTTTTAGAATTTGATTTAATCGAACCAGGTA AAAATATTGGATAAA  
ACCAGAGAATTAGTTATTTCTACCTTCAATAAAAAGTGTGGAAGATGTA AAAAGATGGA  
ATGGATATTAGCTTGGGTTGCTTGAATGTTAGAACGAAAGAATTACTTTGGTCTGGA  
GCAAACAATCCGCTGTGGGTTGTTCTGCAGGTAGTGATGAAATTATTGAGTGGAAA  
GCCGACAAACAACCAATTGGAACCTATGCCGAAGAAAAACCATTCAAGACACATTC  
AATGGTGTGGAGCCAAAACAACCATCTATTTGTTTACCGATGGATATGCTGATCA  
GTTTGGTGGACAAAATGGTAAAAAATTCAAATACAAACAGTTTAAAGATTCCATTTT  
GGCTATTCACGATCGTCCAATGGAGGAACAAAAAGAGCATTTAGAAACGACTTTTCGA  
AAGCTGGAAAGGCGAATTGGAACAAGTCGATGACGTTTGTGTCATCGGAATTAGGAT  
TTAAATGAAGAATAAGTTTCTATTGCTCTTCGGGTTTCTGGTGATTCTTTTTGTGGCAT  
GTAAAAAAAATGAAACCACACCTGAACTTTTGACCTTAGATACAACCCCTTTCAATT  
TAGCCGTTAGTTCCACTTTACCAGCACCAAATATTCCTAGTGACAATCCCTTAACGGT  
TCAAAAAGTTCAATTGGGACGAATGTTGTTTTACGAAAAATTGTTGTCCGGAAATAA  
TACCATTTTCATGTGCAAGTTGTCATACACAAGTCAACGGATTCTCAGATTTAAATCAA  
TTTTCTACAGGAATTGACGGATTGTTTGGAGCTCGGCATGCGATGGGAATTTTCAATT  
TAGGATTAATAACGAATGGATTTTTTGGGATGGACGTGTAATACTTTGCGTGAAC  
AATCTTTACGTCCAATTCAAGATCCTTTGGAAATGCACGAAACACTTCAAATGCAG  
TCAATAAACTCCAAAACGATGAACGCTATCGAAAACAATTTGTTTCGTGCGTTTGGAG  
ATGCAGTCGTGACAGCTGAACGAATTTCAATTAGCATTGGAGCAATTTATGTTAACCA  
TCGTTTCAGATAACTCGAAATATGATCAATATTTGCGTGGAGAGATCAATTTAACAG  
AGAGTGAAGAACGCGGACGTGTGTTGTTTTTTCGGAATACAATCCTGGTTTCCCTA  
ACTCATCTGGTGCTGATTGTGCGCATTGTCACAGCGGTAGTAATTTTGAGAACGATC  
AATTCATGAATAACGGATTGGACCAAGAGGGGGATATTTCTGATTTAGGCAGACAAA  
ACGTAACGCAATCACCAGCTGATAAGGGGAAATTCAAAGTAACATCTTTACGAAATA  
TAGAGGTTACGGCGCCTTATATGCATGATGGACGTTTTACAACCTTCGAACAAGTTG  
TAAATCATTACAGTGACAATATTCAACAATCTGCATCCTTGGATCCTGCTTTGGCAA  
TACAATGGCAACAGGTTTGATGCTTACTACTCAAGATAAAAATTGACCTGGTAAATTT  
TTTGAAGACTCACAGATCAGACTTATTTAACCAATCCAGCGTACAAGAATCCCTT  
CTAAATGGCTCTCAAAAAGATGAGCTCACATAATTTTCGTTTTCTTGGGAATTCTAAGT  
TTGTTATTGGTTGGCTTTGTTGAAGTTGATCCTTTTCAATCTATCCCTTTAGTAGAAGG

TTTTCTGAAATGCATATTCCTGCCGACAATACACAATCAAAAACAAGAATTGCTTT  
GGGTAGAAAACACTATTCTACGATCCAATTTTATCGCTCGACAGCACTATTTTCATGTGCC  
AGTTGCCATAAACAGAACTTGCATTTCGCAGATTCATTGCCAATAAGTCCTGGAGTT  
AAGAACAGAATTGGAAACCGAAATGCCCAACACTCGCAAATGTTGGCTACAATCCT  
ACTTATTTGTTTCGATGGATTTTTAGAGTTCATTGGAAAAGCAGGTAGTTGTTCCAATAG  
AAGAACATGCAGAAATGGCCTTCAATATGGTAGAAGCTTCAAAACGCTTAAAACGA  
AACAAAGAATATGTTGCACTTTCCAAAGAAGCCTATAATCGGGCACCTGATCCATTT  
GTAATAACCAGATCTCTTCGAGTTTTTCAGCGTACTTTCGTGAGTAATCACTCCAAAT  
ACGATTTATTTCTGCGCAAAAAAGTGAAATTCACAAAAAATGAAGAACGAGGACGT  
ATGTTGTTTTCAACGAATTGCATTGTTCTAACTGTCATAATGGTTTTAATTTACCAA  
CTTTTCCACTCAAAACAATGGATTCTTTGAGATGTATGCAGATTCAGGTAGAATGCG  
AGTAACTCGGTTAGAAGTAGACCGTGATTTGTTCAAAGTACCCACACTACGCAACAT  
TGCTCTCACTGCTCCATACATGCATGATGGAAGTTTCAGCTCTTTGCGCGAAGTCATT  
CAACAGTATGAAAAGAATGGATTTAAAAACAAAAACAAACACCCAATCTTACAACC  
TTTTTCAATCAGTTTAGAGGATGAAGATGCCTTAATTGCGTTTTTAAATACTCTAACA  
GACCATCAATTTATTACTAATAAAAAATTCAGTAAACCGAAAAATTAGATGAAAATC  
GTAATCTTTCTGCAGCATATCCATACCGAGGTGGTATTTCTCAATTTAACACCAAGT  
TACATCAGGAGTTGAGTAAAGAGAACGAGGTGTTTTCTGTAATTTCAAAAGACAAT  
ATCCTGCGATTCTTTTCCCTGGAAAAACACAACCTTGTTACGGAAAAAGATCAGGTGG  
AAGTACTCAAAACAGAACGTTGGTTAGATACGATTAATCCGATTAGCTATCGAAAAA  
CAGCCGCTAAAATCAATCAGCTCAAACCAGATGTATTGATTACAAGATATTGGATGC  
CTTTCTTTTACCCTCAATGGGATATATTGCAAAGAAAATGAATTCCAAAACATAAAA  
GAATCGCTATTGTAGACAATTTGATACCTCACGAATCACGTTTCTTCGATAAGAAGTT  
AACAGCCTATTTTGTCCGAAATCATGATGGATTTATCGTAATGTCAAAGCAGGTTCA  
GTCAGATTTGTTACTATTGAAACCTGATGCAAAGGTATTATTGCTCAATCATCCAATT  
TATGATCAGTTTGGTGAGAAATTAGACCGTATTGATGCTTGCAAAAAACTTCAAATT  
AATCCCGAGAAGAAAATTCTGCTCTTTTTTGGATTGATTTCGCGATTACAAAGGCCTA  
GATATCCTTCTCAAACGCTTGCTAAATTAGACGATTCGTATCATTAGTGGTTGCAG  
GTGAGGTCTATGGTTCCTTTGAAAACACTATCAAAAAATCATTGATTACAGAGAATCTTA  
AATCGAAATTAACGTTACATCTTCACTATATTTTCGGACCAAGATGTAGCGGCTTATTT  
TTCCGCGGCAGATGCATTAATGATGACTTACAAATCAGCAACTCAAAGTGGAATTTCT  
TGCGATTGCTTTGAATTTTGAATGTCCTTCCATAGCCACTTCTGTTGGTGGTTTTAAAG  
GAAATCATTAAAGGATCAAGTGAATGGTAGGTTAAGTGCTAGTCAGGAGCCTGTAGA  
AATCGCGGAGATTATACGTAATTATTTTCAGCAACAATCAAAAAGAAGGCTTCTCAA  
AGCACTTTTGAAGAGAAATTAGTTTTTCAGCTGGAAATATTTTTTCAGAGAAATTACG  
CTTTTTATAGATGCTTTGTAAATGCAGCAAGAAAGAATTCATTTTGAGAACTTAAAC  
GGATTGCGATTCAATTGGTGCTTTTCTCGTTTTCATTTTTTCATGCATTTACGATAAATCG  
CGAAGTTTGGGGGAGTTTTTTTTGAATCTGGACCATTTCTTTTGTTCGCAAACTAACT  
TCCATCGGACATTACGGTGTAACCTTATTTTTTGTCTTAGCGGATTCCTAATTACTTA  
TTTGCTCTTAAACGAATTGAAAGAAAAAGGAAAAATTCATATTGGATTCTTTTTAGTT

CGCCGAATTTTACGACTTTGGCCCTTGTATTTTGTCTTGTTATTTTGGCTTTTTTATC  
TTTCCCTTGCTTCCATTTGGCGTTCAAACAATTTCATGAATTTTGGAGATATGCCTTATT  
CTTATCGAATTTTGTATGAAATTATTCATGGAAGTCGGGATAGTTTGAACCTTCTCACA  
GCGACTTGGAGTGTTAGCATTGAGGAACAATTTTATATCATCTGGGCACTCTTTATTG  
GACTTTTTCAATGGAAAACAATTCGTTCTTTTCGCATCTTTTTTTTGATTATCGTTTTC  
GGATCTTTCTTCTTTAGATGGTATTATTCAAACAATGTAAGTGTTTTATATTATCATA  
ATTGAGCGTCATTTTCAAGATATGGCAATGGGCGGTTTATTAGCAACTTGGGTATTTAA  
AAAATCCATCATCTCTTCAGTTCAAGAGCTCAAGAAATGGAAAATTGCACTCATTTA  
TTTGATGGGGATTTCTTTTTTATTTTTTCGCATCTCATATACTTCCAGGGAAGTTCATTG  
CATTAGAACGTTTGGTTTCTGGAGCATTTTTCTCCTTTGTATTGTTGGAACAATTACA  
AGCCAAATATTCATTCTACAAGGCAGATCGTATTCCTTATTTGAACGAGCTGGGAA  
ATTAACGTATGGATTTTATTTGTTTCATTCTTGATGATCTTTTACCTGTGTAATCGT  
TTGAGACACTGGAATGGAATCAACATATTGAAGGATTTATTGCTTATTTATCCTCCT  
CTTAGTGATTAATTCTTCACTATCCATTCTTTCCTACCGATACTTTGAAAAACCACTAT  
TGAATCTAAAACGATATTTTCGGGTATGAATGGCATTTCGACGTAGCAATTATTGGTG  
GTGGAATTATAGGTGCAGCAACGCTTTACAAAATGCAGAAGCGTTATCCTGATTTGG  
CAATTGTTTTGATTGAAAAAGAAGCAAAATTGGCAGATCATCAAACGGGTAACAATT  
CCGGAGTAATCCACAGTGGTTTGTATTATAAGCCAGGTTCTTTAAAAGCTAAAAATT  
GTGTTTCAGGGAGACATGAATTAGTTGCTTTTGCGAAAGAACACCGTATTGATCACG  
ATGTTTGTGGAAAAGTAGTCGTTGCAGTAGATTCTTCTGAGCTATCGAATATGGATA  
AAATTTTCCAGAATGGATTGGCAAATAATACAGAAGGTATTGAAATGATCGATGCAA  
AGCGCGTGAAAGAAATCGAACCTTTGTAGAAAGTATTGGAGGGATTTGGGTTCCTT  
GTACAGGAATTATTGATTTCCGTGGAGCAACCGAAAAAATGGCAGAAATTGCACTTT  
CAATGCAACCAAAAAGCGCCATGAAATTGAATCATGAAGTTGTTGGAATCGAGCGCT  
CAGCTGAAAAACAATCATTGCTACGAACAAAGGAAACATAGAAGCTAAGTTTTTG  
ATTTTCTGTGGTGGACTTCAAGCGGATCGATTGGCTAAAAAAGATGGTGTAAAGTTG  
AAAGAGAAAGTTGTTGGTTTTAGAGGAGATTATTATGAATTGACTCCTGAAGCCAAA  
CATAAAGTGAAGAACTTGATTTATCCAGTCCCAATCCAGATTTTCCGTTTTTAGGAG  
TACATTTTACACGAATGACCAATGGCGAAATCGAATGTGGTCCAAATGCTGTTTTCA  
CATTTAAACGAGAAGGGTACGGGAAAACAGATTTCTCCTTCAAAGATACTTTTCGATG  
CCCTGTCTTACAAAGGAACTTGGAATTGTTCTTCAATAACATGAAATTTGGGATTG  
ATGAATACCGCAGAGCTTTTTCAAACGATTATTCTTAAAAACACTTCAACGAATCG  
TTCCATCCTTAACAATGGAAGATATTTCATCCAGGTAGAGCAGGAGTAAGAGCGCTTC  
TTTTAGCCGAAGACGGAGACACTCGTGATGATTTCCGATTTGAATTTTCATGAAAATC  
TATCCACGTTTTAAATGCTCCTTCTCCAGCTGCAACTGCGTCATTAGCAATTGGTGGT  
CAGATTGTGGACGAAGCTGAAAAGCATTGTTGGCTTGAAGTGAATGGAACAAATTAGT  
GTTTTTGATATATTCAAGATCGGAGTTGGTCTTCAAGCTCGCATAAATGGGACCTT  
GGAGAGCAGCTCAACAATTTATAAATCTCTATAAAGTAAAACCTGGAATTAAGAA  
ATCAAGCGAATTCATGTGGATTTGTATGGTTCTTTAGCTAAAACCTGGGAAAGGACAT  
GGTACAGATATTGCCGTTCTTTTAGGATTGATGGGTGAAGATCCTGTTACCATTGAGG

TAAATACAATCAATCCTAAATTTGGGAAGATTCATCAAACAAAAACACTCGAAATTT  
GCGGAGAACAAGTCATCACTTTTGATCCCGAAACAGATTTGATTTTCCATTTGATAA  
ATCACTTCCTGGACATCCCAATGCATTGACTTTCTATTACCATGATGGATGGATTT  
CAAGAATCTCATACTTATTATTCCGTTGGTGGAGGATTTGTAGTAAAAGAAGGCGAA  
GAGGAACTTACTTTATCCGATTCAGCTCAGTTACCATTTCTATTGAAACAGCTGCTG  
ACCTTAAAAGATATTGTGAAGAGCAAGGTGTTAGCATCTCTGAAATTGTATTGCGAA  
ACGAATTGACTTGGAGAACTCAGGAAGAAACAATTGCTGGATGTTTGGAAATTTGGA  
ATGTTATGCGTGATTGCGTCTTCAGAGGCGTAAATACAGAAGGAACACTTCCCTGGAG  
GATTAACGTAAGAGACGGGCGTATGAAATGAGCAGACGTTTATTGAACGGAATT  
GCTTGTAAGATTCCAAGATTTTCATCAGACAAATTCAAGCTACGAGTAATATTTTC  
CAGAACACTTTGAATTGGGTGAGTTGTTTTGCTCTTTCTGTAAATGAAGAGAATGCCG  
CATTTGGGCGAGTTGTTACTGCACCAACAAATGGAGCTTCGGGAGTTATTCCTGCGG  
TGATGATGTATTACGTTTGCTTTGCGGGAGGAACAGAAGAGAAAGACATCATTGCT  
TCATGACAGTAGCTGCGGAAATCGGAAGTATTTTCAAAAAACGATCTACGATATCGG  
CTGCCATGGGTGGTTGTCAGGCCGAAATTGGCGTTTCATCTGCAATGGCTGCTGCTGC  
TTTGACAGAATGCTTGGGGGGAAGCCCAAATCAAGCAATGATGGCTGCGGAAATTG  
CCATGGAACATCATTTAGGATTAAGTTGTGACCCGATTGGTGGATTGGTTCAAATTC  
ATGTATCGAACGAAATACGATGGGAGCAATTAAGCAATTACAGCTTGTGAGTTGGC  
TTTGACAGGAGATCCGGATACGGCAAAGTTTCGTTGGATGGAGTGATTAACGAT  
GTGGGAAACTGCTTTGGACATGAATTCAAAGTACAAAGAAACATCCGATGGAGGAT  
TAGCGACGAATATTTCCGTGAATATTTCCGAGTGTTAAATGAAAAATCAACTCACAA  
TAGGATTATTTGGTTTCGGCTGTGTTGGAACAGGATTATACGAAGTATTAATAAAA  
CAACCTTGCTTCAAGCATCGATCAAGCACATTGTTATCAAAGATTTGAGCAAAAAAC  
GGATCATTGATTCAAGTTACTTTAGTACGGATTCAAATCGAATTTTGAAGATGATG  
AGATCAATGTGGTGGTGGAAATTAATCAATGATTCAGAAGCTGCTTATGAAATTGTCA  
CCACAGCACTAAGAGCTGGAAAACATGTAGTCTCCGCAAATAAAAAACTGATTGCAT  
ATCACCTGAATGAACTGGTTTCGTTGGCAAAGAAAATAATGTTTCATTTCTATACG  
AAGCTTCAGTTGGTGGTTCCATTCCAATTATTCGAACTTGGAGGAATATTATAACA  
ACGATTCATTTCAAATATCAGTGGAATTGTAACGGAACAACGAATTACATTCTCA  
CAAAGACGGCGGAAGGTGAATCTTTCGATGAAGCATTGAAAAATGCACAAGATCTA  
GGTTTCGCAGAATTGGATCCAACATCAGATGTAGACGGTTTTGACGCAAAATATAAG  
TTGGTTTTATTACTGAAACATGCTTTTGGATTCACTACGAAGCAAGATGCCGTTTGG  
ATTACGGAATTCGTCAGTTGAAAGATTGGGATGCAAGATATGCACGCGAAAAAGGA  
TTGAAAATTAATTATTGGCATTGGAACCCGAATTAATAATCAAATAGTTGGTTTTG  
TAGCTCCGCATATCATTCCGAATAATCACTTTGCATTTAATGTCGAAAACGAGTTTAA  
TGCAGTGGTTGTTGAAGCTTTGTTTTCCGATAAGCAATTGTTCTTAGGAAAAGGTGCC  
GGAAGTCACCCAACGGCAAGTGCGGTTCTTTCAGATATTTCCGCTTTGCAGTTTGACT  
ATGCGTACGAATACAAAAATCAAAAACAGAAGAACACTTGAGTTTTGATAGTGATT  
ATTCGCTGAAAGTGTACTTGAGTGCAACCAGTCAGGAAAAATTGGATCAGATAACGT  
TTATTGAAACACATGAAACGTATACCGGACAATCTCATAGCTATAAAATTGGAATCA



TTTCGTATGAGGAAATTTCTAAGCAAGATTGGAACAATGCACCTGATTATTTCTTGGC  
AGTTATTCAGATAGTATTCAATTGACAAAAACACAGATATTTCTACTGAAAAATC  
AGCACATTTAATTGAGGAATTGTCATGAATGAAAAAATTTCTTTTTACCAGCAACCT  
GACGCAATGAATTGCGGACCTACATGCTTGCGCATGATAGCAAAGTATTATGGACGT  
GTTATTTCAATTGGAGAAATACTGAAGCTGTCAGAAACCACAAGAGAAGGCTCATCT  
TTGAAAAATATTTCTGATGCTGCGGAGAAAATTGGTTTTCGAACAATCGGAGTTAAG  
ATTGATTTTAATACCTTGCAGCAAGATGCTCCGCTTCCTTGTATTGTTCACTGGAAAC  
AAAATCATTTTTTAGTGGTTTATAAGATTTCCAAACAGCATGTTTATGTTGCAGATCC  
TGGGCATGGAATCCTGAAGTATTCATTGGCGATTTCTGAAGAATTGGATAGGAGA  
TAATACAAGTGTTACAACGGAAGAAGGAATTGCTCTATTGTTAGAGCCTACACCGCG  
TTTAAAAAATAGAGGATGATGATCTGGAAAGCAAAAAAGGTTTTTCATTTCTCTA  
TCAATATGATTTTCGCTATAAGAAATACATTTTTCAATTGATGCTGGGTTACTTCTTG  
GTTCAATTGATGCAATTGATATTTCTTTTTAACTCAAAGTGTTGTAGATATTGGGATT  
CAAATCAAGACATCAATTTCAATTTATCTGATTCTGATCGCTCAATTGTTCTTGTTTAT  
TGGTAAAACAAGTGTCGATATTATCAGGGGATGGATTTTACTTCATTTAAGTACCCG  
AATCAATATTTCAATTGATTTTCAGATTTTTTCATCAAATAATGAATCTCCAATCGCT  
TATTTTGATTGCAAAATGACTGGAGATATCATGCAGCGAATCAATGACCATCAACGG  
ATTGAAAATTTACTGACTTCAACCTCTCTCAATACGCTCTTTTCTTTTTTCAATCTGAT  
TATTTTCGGAGGTGTTCTGGCTTGGTATGATTTAAAAATATTTGGTATCTTCTTTTTGG  
GAAGTACCCTGTATTTGGGTTGGATACTTCTTTTCTTGAAGAGAAGAAAGGATTTGG  
ATTACAAACGATTTTCTCAAATGGGAAATGAGCAAAGCAAAGTAATGGAGCTCATT  
ACGGAATGCAGGAAATCAATTACACAATGCCGAAAAGCAGAAACGTTGGGGTTGG  
GAGTTTTTGCAAGCACGCTTGTTTAAAATTTCAATGAAAGGATTGGTATTAGAACAA  
ATTCAAAACATCGGGTTCGCTTTTCATCAACGAGTTAAAAAATATTTTTATTACCATAT  
TTTCGGCTAAACTGGTAATAGATGGCCAGATTACACTTGAATGATGATGGCAATAT  
CTTATATCATTGGACAGTTAAACAATCCGATTCAGCAGTTAATAGGTTTTATCTATTC  
AGCTCAGGACGCCAAAATTGCTTTGGAAAGACTTTCAGAAATCCATAACCGCGAAGA  
TGAAGAACCCGTAGATGAGGAGAAAGTACATGAGATTCCTGCAGATGGCGATTTTGT  
AATTTCTGATCTTCATTTCCGTTACAAAGGAAGCCATGAAGAAGTGCTAAAAGGACT  
GAATTTAACCATTCTTCAAATAAAATCACAGCTATTGTAGGTACTAGCGGAAGTGG  
TAAAACGACTTTGCTTAAATTGCTTCTTAAATTTTACGAGCCAGAAAAAGGATCTGT  
AAGGATAGGAAATGTAGATCTCGGATTAATCAGTCAGAAAACCTGGAGATCCCAA  
GTGGTGCTGTAATGCAGGAAGGATATATTTTCAATGATACAATTGCAAATAATATTG  
CTGTAGGAGAAGATTTGATAGATAAAAAACGATTAAAAAAAGCCGTAGAAATAGCT  
AATATTGGAGAATTTATTGACGAATTACCCTTGGGATACAATACAAAAATAGGGATG  
GAGGGAACAGGTATGAGTACTGGACAAAAACAACGTTTACTAATCGCTCGTGCAGT  
GTACAAAGAACCTAAATTCATCTTTTTTGGATGAAGCTACTAGCGCATTAGATGCTAA  
CAATGAGCGGGTTATCATGGAACAATTGGATACTTTTTTCAAAGGAAGAACAGCTAT  
TGTTATTGCACACCGTTAAGTACAGTGAAAAATGCAGATCAAATTGTAGTTCTTGA  
ACATGGAATTATTGCAGAGAAAGGAACCTACACGGAGCTGGTTAAATTGCGTGGAA

AATATTATGATCTAGTGAAAAATCAATTGGAATTAGGAAATTAGATGAAGATAGAAA  
TCATAGATTATTCGGATGAACTGAAGGAATTTATCCGAATTCTCAATTATGAGTGGCT  
AGAGGAATATTTCCATGTAGAAGAAGGAGACCGCCTTTCACCTTTCACACCCCCAGGA  
AACCATTATAGATAAAGGAGGATTCATTTTTTATGTAAAATATGGCGAAGAAATAGT  
TGGAACAGTATCACTTCTTAAAAAGTCCAATTATGTATTTGAATTGGGTAAAATGGC  
TGTTTCTAAGAAGGCACAAGGATTAGGACTTGGA AAAATATTGATGGAACATTGTCT  
GAAAGTTGCAACAGAAAAGCGAATCGAAAACTCATTCTTACTCAAACACGCTTCT  
TGAGCCAGCAATTCACCTGTATCGGACATACGGATTTGTAGAAATTGAATTGGAACA  
AGGTGTTTATGAAAGAGGAAACATCAAGATGGAGAAAAATCTTATCTAAATGAAAG  
TTTATAACAATATATTGGAAACCATTGGTAATACGCCTTTGGTGAAATTGAACAAGC  
TCACAAAAAAGTGTAAAGCAACTGTTTTAGCAAAAAGTTGAGACAACGAATCCAGGA  
AACTCGGTGAAAGATAGAATGGCTGTAAAAATGGTAGAAGATGCCGAAAAATCAGG  
GGTTCTAAAACCAGGAGGCACAATCATTGAAGGAACTTCAGGAAACACAGGAATGG  
GCTTGGCATTGGTAGCAATTATCAAAGGTTATAAGCTTATTTGCGTTTTGAATGACAA  
GCAGTCGAAAGAGAAAAATGGATATTTTGCCTGCTGTTGGTGCGGAAGTAGTTGTTG  
TCCAAGTCTGTTGAGCCTTCAGATCCTCGTTCTTATTATTCAGTATCAAACGATTG  
GCGAAAGAAATTCCAAACCTCTGGTATGTGAATCAATATGATAATTTATCAAACAGA  
ACTGCTCATTACGAACAACTGGACCAGAAATTTGGGAACAAACAGAAGGGAAAGT  
AACGCCTTTATTGTAGGAGTTGGTACTGGAGGAACAATTTCTGGAGTTGGAAAATC  
CTTGAAAGAGAAAAATCCAAACATCAAAATTTGGGGAATTGATACGTACGGTTCTGT  
TTTCAAGAAATACAAGGAACTGGAATTTTTGATGAAAATGAGATTTATCCATATAT  
CACTGAAGGAATTGGAGAAGATATTCTTCCTGCAAATGTAGATTTTGATGTGATTGA  
TTTGTGTTGAAAAAGTAAACAGATAAAGATGCAGCCGTTTACACTCGTCGTTTGGCGCG  
TGAAGAAGGGATTTTTGTAGGTAATCTGCTGGTGCAGCGATTGGTGGATTGTTGCA  
ATTGCAAGATCAATTAACAGAAAATGATGTAGTGGTTGTTTTATTCCACGATCATGG  
AAGTCGTTATGTGGTAAAATTTTTAACGATGATTGGATGCGTGAGCGTGGATTCTTG  
GAAGAAGAGTTCAAACAGCTGAAGATGTAATTGCTCGTCATGCAGATTTGCCTTTG  
GTAACCTTGTATTCCGAAGAATTAGTTTCACATGCAATTATGAAAATGCGTAAATAC  
AACATTTCTCAAATTCAGTTTTAAGAGACGGAGAATTGGTTGGTTCTTTGAATGATT  
CTCAGGTTTATCAATTGTTGGTTGATAATCCTACTTTGAGAGACACGCCGATTTGAA  
AATTATGCAAAAACCTTTCCAGTAGTTCAAGGAACAGCGAAATTGGAAGAGGTAG  
CGAAATTAATCAATGAGCAAACACCGGCGGTTATAGTAGAGCGCGCTAATGGTGAT  
AAGAAAATCTTGACTCGTCAGGATGTGATTGCTTCTTTGGCATAAATGGATAAAATA  
AAATATACAGATCAAATGCAGCGAACGGTGGAGATTCATTCCACCGTTTCGCGTATT  
GTATCGTTGGTTCCATCTCAAACCGAGTTGTTGGTCGATTTAGGATTGAAAGACCGCT  
TAGTTGGGATTACCAAGTTTTGTGTTTCATCCGAAAGAGTTACGGAAAGAAATTCAAT  
TAATAGGTGGAACAAAAAATGCGAAAATTGAGTTGATTTCAGTCTTTGAATCCGGATT  
TGATTATTGGAATAAAGGAAGAAAATAATCAATCGGATATTGAAGCTTTACAAAAC  
TATGTCCAACCTGGATGAGCGATATTTCAATTTGGAAGATGCGTTGGAGATGATTC  
AGAAGCTAGGAGAGATTACTGGAACAACTGAAAAAGCTACTGAAATTGTATCAAGG

ATTCAAACGAATTTTTCTACAATCAACGAACCCGCAAAGAAAAGAGGAAGTGTACTT  
TATCTGATTTGGAAAAATCCGTATATCGCAGCGGCTGGAAATACGTTTATCGATGCA  
ATGCTAGAACGTTTGGGGTTTAAAAACGCGGTTCAACAAGATCGTTATCCGCAAGTG  
AATCTGGAAAAATTGAATCCTGATTTTATTTTTCTGAGTTCAGAACCTTTTCCATTCA  
AAGAAAAACATATCGAAGAACTTCAAGTGCAGTTTCCATAATAGCCAGGTTATTTTGG  
TTGATGGTGAGTTCTTTTCTTGGTATGGTTCTCGATTAGTAGAAGCCCCCAACTATTT  
CAAGAAATTGTTAAATCTGATTTTCAAGTTTGAATGGACAAATCTAAATTTGATAAGTTG  
CAGGCTGAGAAGAGGAGCAGTGTGGAAAGATTGCACATTCGAAACAAAAACCGAGA  
ACGTTATGATTTAACTGCTTTAATCCATTCTACTCCGGAGTTGAAAAGTTATGTA  
CCAAATAAATTTGGTGACGATTCCATTGATTTTCAAGTCCAGCTGCGGTCAA  
ACTTC TGAACAAGGCTTTACTGAATTATTATTATGGAATAAGGAATTGGGAATTTCCAGATG  
AGA  
ACTTATGTCCGCAATTCCTGGAAGAGCTGATTATATTCATCACATGGCCGATTT  
GTTAGCTGAAAACAATCCGAATGGTATTCCGCAGGGGAATCAAATCACCTGTTTGG  
A  
TGTGGCGTTGGAGCCACATGTATTTATCCCATCTTGGAGTTACGGAATACGACTGG  
AGTTTTATTGGGTCTGACATTGATCCGAAATCGGTTGCTTCTTCACGGCATGTTGTGG  
AGG  
CCAATTCTTCTCTTCGAAATAAGATTACATGTCGTTTACAAACAAGACCGAAAG  
CTATTTT  
TAGTGAATTATAGGAAACGAAGAAAAATTTGATCTGACAATCTGCAATC  
CACCTTTT  
CTACTCGTCCTTGGATGATGCACAAAACGGAACACGAAGAAAAATCAAAA  
ACCTTT  
CAGGGAAACAGTTAAAAATGCCAGA  
ACTTAATTTTTCTGGAAATAGCAACG  
AACTGATTTGTGAAGGAGGAGAATTTCA  
GTTTCTCATGAACATGATTCAGGAAAGTA  
AAAAGTTCTCTAAAAACTGTTACTGGT  
TTTTCGTCCTTGGTCTCAAAAAGAATCCA  
ATTTGAAAGGAATCTATCAGTCATTGGATA  
AGAATCAAGCTGTTCAAATCAAAACAATTCC  
AATGGGAACAGGAAATAAAAGAAGCCGTA  
TCGTTTGGTGGACATTCCTTTCCAAAAC  
GGAACAAAAAGAATGGCGCCAAACGAGGT  
GGTAGATGAACAAAAAATAGTAATC  
ATCAATGGTCATCCAAATGCAAATTCATT  
CAACTTTGGACTTGCAGAAGCATA  
CAAAA  
AAAGGAGCAGAAATAGCTGGTGTGAAAT  
CAAAGAAATTGTCATTGCGGAATTA  
AAA  
TTTCAATCCAAATTTGCAATTTGGTTAT  
CAAAAAAGAACCGAACTAGA  
ACCCGATTTACTCGAAGCGTGGGAGAAAAT  
CAAATGGGCAGATCATTTGGTTTGGATT  
CATCCAGTTTGGTGGGGTGGTTTACCCGCG  
ATTACCAAAGGATTTATTGATCGGTTAT  
TCCCTTCCAGGGTTTGCCTTTCAATACCGC  
GAAA  
ACTCTTCTTTTTGGGACAACTATTGAAAGGG  
AAAACAGCACACATCATTACA  
ACTTTGGATCAACCCGGCTGGTTCTATCG  
GTTCTATTTAGAAGACCAAGTGTGAATCA  
ATTGAAGAGATCTACTTTGCAATTCGTG  
GGAATTA  
GCCCTGTGAAAGTGAGTTATATTGCGATT  
GTCAAAA  
ACTCATCTACAGGAATGCGTG  
AAAAGTGGCTAAAAAAGTTGAGAATTGGG  
GAAAAGGGCTGAAATAAATGGAATTG  
AAATCATATTTT  
GAGTGTTCGATATTTTACTTCTGGAGAA  
ATTGATTATGCTATTA  
GCCTATTTT  
CGAAGCGAAAGTTAAATAAAGGTGATT  
ATTTCAATCAAGAAGGTCAA  
AATGTT  
CAGAAGTTGCTTTCGTTCAAAAAGGAAT  
ATTCAGATCTTTTTATGCCTCACA  
ATCTGGAGATGAAATCACCTATTGTTTT  
CGTTTTCCGAATGAGTTAATCGCTGCTT  
ATCTTCTTT  
CATTACTGGAAATCCCAGTGTGGAAAAC  
CTGCAAGCACTTTCACCAGCAG  
AGCTATTGATTATCCAACAAAAAGATATT  
GACTTATTGGTGAAAGAAAATCCAA  
AAT

GGGTAACGTTTTTGGAGAATAATTGCAGAACAAAATTATTTAGAACTTGAAACTCGGG  
TATTTCAATTGCAACGAGATTACAGCGCAAGAGCGGTATCAAAACATGCTTAAAAAGC  
AGCCACAGTATATTCAACAAAATTCCTTACAGTACCTTGCCTCTTATTTAGGAATTAC  
ACAACGTCACTTGAGCCGAATTCGGAAACAACTCGTTTTTGGAGACAAATGTCCTGTA  
GATGAAATCAATTTTTTACACTTATTACGAGCTTCTCTTTATGCTCGGTTTTTGCACAA  
AATGTAACCCTAGACCCCAATTTTTGGTAATGCTGGAATCACATTTACCCCAAACACTT  
CTGAAATTAACGACCTTGCATCGGATCTGATGGTTCATTTTCAGTTCTGGATACAG  
TATTGAAGCAGGAGGAAGTGGGATTTATCATTGACAGTAACAAAACACAACAGTG  
ATGGTTCGATTGCTACCAACTTTGGAACAAATGGAATCGCAAACACTATTATTGATT  
ATTCCGAATTTCCATTAGATCTGAAAATCCAAGCGGATGGAAAAATTTGGTTTCAG  
GATCAACTTACCTTGGGCCAACACAAAATGGACCTGGTGATTACAAATCATTTGTGG  
TACGTTATTCAACTGACGGTACTTTAGATGCAAGTTTTTGGAAACAAACGGAATCTTTCA  
ATTAATTCACTCGGATAGTCATATTGCTTCCATTATTACCTTAACTGATGGATCAATT  
CTATTAGCAGGAAACAGTTATGGAAGTGTGCAATTAGTAACTGAATTCAAACGGA  
GTTCTTGATAATCAATTTGGAACAAATGGCACGAGTCACCTATCTGACATGAATTAC  
AGCTTTATTCTTTGGAGTGCTATTTTACTACAAGACAATACGATTCTTTGTGTTGGAT  
ATGAAAACCTCTGAATCAAATAACTCAAAGCTTACTGCAAAGTAGATACAAATG  
GGGATTTCAATTCCTGCTTTCGGACAAAATGGAAAAGTCATTATAGATTTATCAAACA  
CAACCCAGAAATAACTGAATTATTTTCCATGGTCAAAGAAAGTGCTGATGGGAAA  
TTTTAATCGGTGGTTACGCATCCACCAATATTTTACTTCAAATTCATCCAAATGGAAC  
CCCGGATAATTCATTTGGAACGAACGGAATATTGAATCATCCCTATCCTTTTACTGAT  
TTTGAGTTTCAGGAAGACGGGAGAATTCTGATTGGCGGAAACAAAGAAATGAGTGA  
GTACAATTATGGTTACACCGTTACAAGACTTCTTGAAAATGGGAATTTGGATTCTTAT  
TTCAACAGCGTAGGAACATTTGATTTAGATATTTCAACTGGACATGATTATCTTCAAT  
CCATGAAAGTAGATGAAGATCGAATCATTGTTGGCGGTTCTTCCAAGCAAATTCAA  
TTTCAAATTTACCTTAGCAAGTATTGATATCAGTCAAAGTTTATCGATTCAAGAAAT  
TGCTGGTGAATCATTTAACACTTACCCTACTCCATGTGAGGATTACCTTTTTATTAAA  
ACAACAGATTTAATCATCCAAAAAATAGAGTTAGTAGATGCTGCAGGAAAGTATATC  
GATGTATCTACTCATTCACTTGAAACAAATACAATCAATACAACACATTTATCAGGC  
GGAGTGTATCAATTAGTTCTAACTACAGCTGATGGAAATCTATTCGTACAAAAAATC  
GTGAAAAAGTAAATGAAATACGGAATTGCTTTAGCATTAGTGATTGACATTCTCT  
GGATTTTCCCAAATTCAGATTTGAAACGAAATTCGGATGTTGCTCGAGAAAGAATT  
ATTCAAAGTCAACTTGCAAAAAAGGTTGTCAATCCAACACTCAATACGTCAATCCGTTT  
ATAGGAACAGGTGGTTCATGGACATACGTTTCTGACCAGTTCTTCTTTTGGAAATG  
GTACAAGTTGGCCAGATACGCGGTATGAAGTTGGGATGGTTGTGGAGGATATCAC  
TATTCAGATTCGGTTATTTATGGATTTAGTCATACACATTTAAGCGGAACAGGAGTTC  
CTGATTATGCCGATGTACTCATCGTTCCTCAACAAGGAAAGTTGAATACTATTCCAG  
GTTATAAAAAAGCAGGTGGATTTGGCTCGAAGTTTCAACATGCAAAGAAAGAGCA  
CTTCCAGGTTTCGTATCATGTAGAATTGGAGAACGGAATTACAGCAGATCTAACGGCT  
ACTTTGCGTTGTGCTTTACATCGTTATCAATTTTCAAGTGCGAAAGGGAAACGGTATA

TTTTGATTGATTTAGGTTACAGAGATCGGGTTTTAGAGGTTTCTGCAACAAAACTTC  
TGCAAAATTCGGTTATTGGAAAACGTGTTTCTGAAGCTTGGGCAACCCGTCAGCATTT  
GTATTTTAGCTTAGAAACATCCATTCCTTTTACCAAGTCAAATGGATTGAAAATAA  
AAAAGATGGAACGTATTTGTTCTTGATGGAATTCCCAGAAGGAGTGAAAGAAATTC  
GGTTCGTGTAGGTCTTTCGGGAACGGATGAAACTGGTGCGACATCTAATTTAAAATC  
GGAATTAACACCTTTGATTTTGATATTATACGAGCAAGAGCAGCAGGAGCTTGGAC  
GGCCGAACTCGCTAAAATTGAAGTGGAATCAACGAACAAAACCTGTTTTAACGAACTT  
TTATACAGCACTTTATCATACTGATGTTTCATCCATCACTTTGGTTCGGATGTAGATGGC  
AAATACCGCGATTTCAATAATAAAATTCAGCAGTCGTTCGAATTCCATGTATTCTGTTT  
TCTCCTTGTGGGATACTTACAGAGGTGCAAATCCATTATATACAATCACGCAACCCG  
AAAAACAGCAGATTTTCGTAGAGTCGTTCTTCCAGCAATATAAAAATACTGGATTGC  
TTCCTGTTTGGACTTTGTGCAACAATGAAACGAATTGTATGATTGGTTATCATTCTGT  
TTCGGTGATTACGGATGCGTACTTGAAAGGAATTCCATTGAAAAATCCGGAAGAATT  
ATTGGAGGCGATGATTGCATCAAGTACTGCAGATCAATTTGGCAAAAAGCAATATGA  
GGAAACGGGATTTATTTTCAGCGAATATAACAAGCAGAATCGGTTTCAAAAACATTGGA  
ATATGCTTACGATGACTGGTGTATTTCCAAATTTGCTGAGAAATTGGGTAAATCGGA  
AATTGCGAAAAAATATCAACTGCGTTCTGCAAATTTGGATGAATTTAATGCATCCGGA  
AACGCGCTTTTTTCAACCGAGAAAAGATGGAATATTCTTGCCGTATTTTAAACCGAA  
TGAAGTCAATCATCATTTTCACAGAAGCAAATGGCTGGCAATATTCGTTAGCTGCCCC  
TCAACATATTCAGACATTGATTGATATGCACGGCGGAAATGAAGGAATGAACGATTT  
TTTGGATAGTTTGTTTTTAGGAGCTTCAAAAATGTCGGGCAGAGAGCAGGCTGATAT  
TACTGGCTTGATTGGTCAATATGCGCATGGGAATGAACCTTCGCATCACATGGCGTA  
TGCATACAACTATTGTGGTTCTCCAGAAAAACACAGCTTTTTGTAGATTTCGATATTG  
AAAACATTCTACACCAATAATCCAGATGGACTTTCAGGAAACGAAGATTGTGGTCAG  
ATGTCGGCTTGGTATGTATTGAGTTCAATGGGATTTTATCCAGTAGCTCCCGGCAGTC  
CAACGTATGCAATTGGAAGACCCATCATGGATCATGTGATTATCAAAGGAGCCAAAA  
ACTTTGAGGTAGTAACCAAAAACAATTCTTCGGAAAATAAATTTATTCAATCGATTA  
CTTGGAAATGGAGCTGTTTATCAAAGCTCTATATTACTCACGAAATGATTGTTCAAG  
GAGGAATTCTAGAGATTACAATGAGTCCTAATCCCAATAAAGAATTGGCGAATTACG  
AGTTGGATTTGCGGAACGAGATTAGTCCGTCATTTGTTCCAGTTCCTTTTTTTCACGGC  
AAGTCAAACCGTTTTTGAAGGTGAAATGGAAGTGGGGATTGATGTATTGTTTTTTGA  
GAAAGGAAAAGTCTATTACAGTTTAGACGGAACGAAATTTTCAGCCATTTTACAAGCA  
AGGCGGAAAGAATATTCTTCTAACAGAAACAACCTCCCGTTTATGCAAAAGTAGTGCG  
CGAAGATGGTGCAGAAAGCAAGGTGATTAACCGGTGTTTACCAAATACATTTCGAG  
ATAAGAAAATCACTCTTTCTTTCAGAATATGCGAACCAATATTCAGGTGGTGGACCGC  
AAGCTTTAGTAGATGGACAAAAGGAACGGAGGAATATAGAGGAACTGAGTGGCAA  
GAACTTTTGGGAAAGACGTAGAAGGAATTATTGAGTTGAATGAAGCGAAGGAAAT  
TTCTCAAATTCATTTTCTTATTTGCAAGATCAGCGCTCATGGATTTTCTCTCTAAA  
AGTGTTCGAATTGAAGTGTCTAATGACGGGGTGAATTTCCGTAAATTGGGTAAAACG  
GATGGTATTTTCGGTACTGAAGGAGAAGTGTGAAAATTGGTGAATCACCGTTGAG

ATAGCGCCA ACTACTTGTAAGTTTATTCGTTTCAGTGTGGAGAATTACGGACCTTGTC  
CAGAATGGCATTTAGGCGCAGGAAACCAACTTGGTTGTTCTTGATGAAATCACCA  
TCAAATAAATGAAAAAAGTCTTTTTACAGCATTGTTGCTTTCTTCTCGATTTATAG  
CTTCTCACAAGAGAAAGTCAAATATATCGAATATGATTTAGCAAATGGAATGCATGT  
TATTTTACATGAGGAGCACGCTACACCTATTGTAGCCGTTTCTGTTATGTATCACGTA  
GGTTCAAAAAACGAAACCCCATCTAGA ACTGGGTTTGCACACTTTTTTGAGCATTG  
CTATTTGAAGGTTCTACCAACATCAAACGTGGGGAATACTCCGAGTTAGTTGAGAAA  
AATGGTGGAGCATTGAATGCAAACACAAGTCAGGATAGAACGTATTACTACGAAAT  
CCTCCTTCCAACCAATTGGAATTGGGTTTATGGTTAGAAAGTGAGCGTTTATTACAT  
GCGCGAGTAGATCAAACAGGTGTTGATACGCAACGTGAGGTTGTAAGAAGAAAA  
AAGACAACGTGTCGACAATCAGCCATACGCTACTTTTATGGAAAATCTATTTAAGTT  
GGCATAAAAAATCATCCTTACCGTTGGGTTCCAATTGGAAGTATGGAAGACTTGAA  
TGCTGCTCAAGAAATTGATTATGTGAATTTCTACCACACATTCTATGTTTCTTCTAAC  
GCTGTTTTATCCATTGCTGGTGATATCAATATCGAGCAAACAAAAAATGGATTGAC  
AAGTATTTTGTCTTGTTCAAAAGGACAAGCAATTA ACTTATTCCGTGATTTGAAA  
ATCTTTCAGATGCAGATTTCAAACAAAATATGCTGTTGAAAAGACTGCTTTTGATG  
CTAAAAATTTCAATAACCCGAAAGATGCTAAAGCAAAGAATTGTTGAAGAAATAC  
AGTGCAATGTCTTGTGATATTCCAAGACCAAATCCTGCATTTGAAGCAATTTGCGGA  
GTTCAAAGAGAAACAGTATACGACAATATTCAACTTCCTGCAGTATTTATGGGATAC  
AAATTTCCGAAAGAAACAGATAAAGATTTTGTGCAATCGAATTTTTAAATGCGGTT  
TTATCTGGAAGTAATTCTTCCCGTATGAACAAAAGCATCGTTGAGAAAAACAACAA  
GCTGTTGCTGCTTTCTCTTTTGCATTCAACATGGAAGATCCAGGACTGGGAATCGTTG  
CTGCTATCTTCAAACGGAACGAAAGTAGAAGACTTAGAGAAATCATTGGATGAAG  
AGATTAATCAATTCAGGATAATTTAATCTCTGAAGAAGAATTTCAAGCAGTGCGAA  
ATCAATTTGAAAATCAAATAGTTAGCTCCAATTCTACTGTTGCAGGAATTGCTGAAA  
ACTTAGCTCAAACAAAATGTATTTGGAAGTACTGAATTGATCAACAAAACAAATGG  
AAATCTACATGAGCATTACACGCGAAGATATTCAACGTGTTGCTAAGAAATATTTGA  
CTCAAGACAACCGAATCATTTTATATTATTTACCAAAGGCAA ACTAAATGAAAGACG  
ATGTTGAAAATCCAATAATTCGTGAATTTATTAGAAGTCAGACAGACATTGATATTG  
ACCGATATTCTGACAAAGGTGGTTTTTGGAGAATTGTATTTTGGGAAACGTA AAAATTT  
TGACGACAGAGTTGCATTGAAATTTTACGTTCTTGACGAAAATGGAGATGGACACGA  
AGAGCCAATACTCCTCAAACAAATTACACATGACAATATTCTTAAATTGATTGATGC  
AAGAATTATCAACGACCGAATAGCATATTTTACCCCTGAAATTAGTGGTGGTGA  
TTTGCAAATATTATAGACAATTATATTTTGCCGACCGAAAAAGCAGTTTCAATTATT  
CAAGGTGTTTTGAAAGGACTTACAGAATTACACAAACCACCTCTTAACCTTGTGCAT  
CGCGACCTTAAACTTACAATGTTTTAGTTGACAAAATGATGGTATGGCATATTTA  
GCTGACTTTGGGACAATAAAAAAATTCCAGACGGTCAAGATTATGTTTCTGCATCA  
AAGTATACATTTCTATACAGACCTCCAGAAGTAATTCTTGATAACAAATACACCAA  
CAATCTGACCTTTATCAAATGGGGATTATTCTCTATCAAGTTTTAGGTGGACATTTTC  
CAATGAAACAGCCTCACGAATGGCTTAACGGAAGAAAGTTATTTAAATACAATCAA

CTAAATCCATTTGAACAACAGACGTTTTTAGGAAATCACCTTGAAGAATTAATTGTA  
AAAGGTA AAAATTATTGACCTTGACACCTTACCTATTTTCGTTTCTAGGAACTAAAA  
CTATAATAAAAAATGCAACAAATACAGAAATAAAAAAGCGTTTTTCAACCTGTGCCG  
ACTTCTTAAAAGCATTATTTGATTATCAGAAATCTTCCAAGATTGGTGGGTGGACA  
ACGACATAATTCACGCAACTAATAAAAAGACAAAAAGGAATTATAGAATTGTGAAA  
CGTAAAAAGA ACTTTGTA ACTGAATGGAGCAACACA CA ACTGATTGGAGAAAAGA  
TTTTAGTGACAATAAGCTTCAAAAACACATTGATAACATTGAGAGTAAATAGATGAA  
CAATAATACCGTAATGATTACTGAATGCTTGAATGATTTTATCTCTGAAAATGGAATT  
ACTTTGAGCCAATCTGATGCTTTTCGAATTATACACTCTCTATTTGTTAAATAAAAA  
CTAACCTTGGAGCAGAAGATCTTCTATTAGCAATAGTTGACGGCAGTAGTGATGGAG  
GTATTGATACATTTTTAATAATAATTGATGATACTGTTATCAACTCAGATGAAGA ACT  
AGAAAGTATAACTGTTAAATCTGGTTCTACCATAAAAAGCAGTAATTGGGCAGTCAA  
ATTTAATAGTAAATTTTCAGAAGATGTTGTAAATAAATTTTTATTTC AATGGATTCA  
GTTTGG AATTTAGAGTCTGACTATGATAAATTAATAAGTTTGTTAATGAACAATTAG  
TTGAACGGATATTGTGGTTTAGAGAAGTGTGGAAAAAGCAGTAATTAAGGGGGCT  
CAAATAGATATTCAATTTTATTATGGTTGTGTTTCAAACGAAATACATGAAAGTGAC  
ACTTTTAAAGAGAAAAAGAAAAGGTAATATTACAAGCAAAATCAAAGTTCATAA  
TGCAATGTTTTCATTTGATTTGTATAGTGCTGAGGAGTTACTGAGCCTTCATAGTGAA  
AAAACGGAGGTACATTTAGA ACTTAAATTCAAGGAGCAACCAAGTACAATTGACTA  
CAAAGGATCTAATATTGGATATATTGGAGTTGTTAAATTACCCGATTATTATGATTTT  
ATAACTGATGATAATGGTGT CATTAGAGAATCAATTTTTGAAGAAAATGTAAGACAT  
TATCAAGGAGATGTTGATGTTAATAAAAAATAAACGAATCTTTAAATTCTGATTTT  
GAACTGATTTTTGGTGGCTAAATAATGGTATCACCATAATAGCTCAAGAAGTACGT  
CCTTTAGCTAAGACACTCCAAGTTGAGGGTGTGCAGATTGTTAACGGACTTCAAACG  
TCATACACTGTTGGCAAGAATTATAACAAAGATGAAAATGATACAAGATCTGTTCTG  
GTTAAGATCGTTAAAAGTAGCGACAAGGAAACAATTGATAAAATTATATCCGCAAC  
AAATCGTCAAACACCAGTAAATCCAGCTTTACTTCGAGCAACAGATGATACTCAGAG  
AAAATTGGAATTATTTTTGACCAAAAAGGATACTTTTATGATAGACGAAAGAATTT  
TTATAAAAATCAAGGGAAACCAATTTCTAAAATATTTGCTATTCAATCAACCGCTCA  
AGCAATTCATGCAATTTTAAATAGAAAGCCTGGTGAAGCCAGAGCCAAGCCAACCA  
CTTTAATAAAAACTAAGGAAAGCTATGAGTCTATTTTTAAGCCCGATTTAACTTTCA  
AGCCTATCTCAATTGCTGTTTAGTAGTTAGAAATGTGCGAACTAGATTA AAAAACAC  
TGCAATTAATAAAGAAGAACGTAGTTTAATTAGGACTTTTACTTATCATA CATCAAG  
GATTTTCGTTTCAGAGGCATTGAAAAATCTCATCCA ACTCATATTGAGTTATCTACG  
TTAGAAATCCAAGTTTAAACGGATGAAATATTCACAAGTTCCGTTGAATTTATGAAA  
GAACTATAGATGAATTTAAA ACTGTATCTGGCACTACTACAAGTTCATCTATATCTA  
AGTCTGGTCCATTTGAGGAGTTACTGACAAAAAATTAATTGAACGATATAGAAGCA  
ATTAAATGAAATTCATTCAAGGAAAAGATCGAAATCAGACAGAGTTTTTCTGTTTAG  
ATCAAGCGGTTTCAGAAGACAATGAAGTGCGATTAATCGATTTGTTTGGTGGAGCCA  
TAAAGCTTTCAGATTATGGTTTCGATATGTCGTTTATAGAGAACGGTTCGGCCAGCTTA

CCACCCCGCTGATTTATTGAAACTCTTTATTTATGGGTATTTGAACCGTGTTTCGTTTCAT  
CCCGACAATTGGAAAAGGAATGCAAACGTAATATTGAACTGATGTGGCTCATGAAA  
GGTTTGGCGCCCACCACAATACGATTGCCAATTTTAGAAAAGATAACCCAAGAGCT  
ATCCGAAAAGTGTTTCATGCAACGGTTTCGCTTGCCAAAACTTTGAATTGATTGGTG  
GAAAATTACTGGCTGGTGATGGAACCAAGTTGCGTGCACAGAACTCGAAGAAAAAC  
AACTTTAACGAAAAGAAAATTGAGCGTCATATTGCTTATATTGACGACAACTCAAT  
GAATACAGTGCTATCCTGGCAAGTGAAGACAATGATTTAACAGCGGAGAAAAAGCA  
GAAAATCAACGCTAAAATCGATAAGCACAAGCAGTACAAGAACAATAACGAAGCAT  
ATAAAAAGCAACTCGACGAACTGGACAAGTACAAATTTCAACTTCCGATCCCGACA  
GCAGACAAATGATTGTGCGCAATAACATAACTGAGGTGGCATATAATGTTCAATCGA  
CCGTTGATGCAAAACACAACATTCCAATTGATTTTAAGGTCACCAATAAAAACGATT  
CAAAGCCATGGGTGCAATGGCTCGCAGGGCTAAAACCATTCTTGAAAATCAGATT  
TCACAATACTTTTCGATAAAGGCTATCATACTGGAACCGAATTCGATTACGCACACA  
AACAGGGGTAGAAGTATTGGTAGCTTCCCTGATGTTGCTTCACATGCTCCAGATA  
TTTCCTTTGATGTAGAACATTTCAACTACAATAAGGAGCGCGATGAATATACCTGTCC  
AGCTGGAGAGTTGCTCACCACAAACGGTCGTTGGTACAACAAGGCAAGCGGGAAAA  
CGATCAACCGCGTAAAACACTATAAAACAAAAGCTTGTTTGACATGCAGTCTTTTTG  
AAAATGCACACGCAATAAAACGGGGCGTTTCATCGAGCGTTCGGAACACATGGAT  
TTAATTGACGCAAACAAAAACGACTTCAACGAAACATGGAACTTACCGCAAACG  
ACAAGCAATCGTGGAACATCCGTTCCGGTGCATAAAGCGTCAATGGGATTTTTATTA  
TGTGATGACTAAAAGACAATGAAACATGCAACTGCAGATGTTGGATTGATTTTTAC  
CTGCTACAATTTGCGTCGAATATTCAATTTACTTGACCAAAATGAGCTCAAAAATTC  
TTAAGAGA ACTTGGTTTTCTATTTTTGATTCTGAGCAGCCATTTCAAGACGATTGCG  
AAGATTTTAAAGAAAGGATTTACTCCGAAACATTTTGTGAAACAAGTTATACAGCGC  
TCTTAAAACAGGTATATTTATCCAAAAACAGATTGTTTAGGTGTTTATAAAATTTTA  
TACTTTTTATTCGATTACCCCTTCAAAAAGTGTAAGTTGTCAAAAATTTTGAATTT  
ATGGCAACAAAACGGTTACAAGCGTATCAGGATGTAATCGTACACCAAAAACA  
CATCGATTACGATGGAAAAGTTTCTGATTTATTTGGAAAGAATGTATTTTCATGCAGA  
AGTAATGCGGGAATACCTTCCATCTGATGCATACAAATCGATGATGGAGTCTATTCA  
AAATGGAACGCGTTTGGATCGTAAAATGGCTGATCAAGTTGCTTCAGCAATGAAAGA  
TTGGGCATTAACAAAAGGGGCCACACATTATACACACTGGTTTCAACCATTA ACTGG  
AACAACTGCAGAAAAACACGATGCATTCTTCAAGCCTGTTGGACCAGGTCGCGCAAT  
TGAGCGTTTTGATGGTGAATTGTTGGTTCAACAAGAGCCAGATGCTTCTTCTTTCCA  
AATGGAGGAATTCGCAATACATTCGAGGCTCGTGGTTATACAGCTTGGGATCCTTCA  
TCACCTGCTTTCGTAATCGGGAAAACGCTGTGTATTCTTACAATTATGATCTCCTACA  
CTGGTGAATCCTTGGATTATAAAATGCCATTATTA AAAAGCTTTACATGCAGTAGATA  
AAGCTGCTGTGGAGGTTTGCCAATATTTTGATAAAAACGTTACAAAAGTAAATGCAA  
CGCTTGGTTGGGAACAAGAATACTTTTTGGTCGATCAAGCTTTGTTTAATTGTCGTCC  
AGATTTAATGATGACGGTTCGCGCATTATTTGGTCATGCTCCTGCAAAAAGGACAACA  
ATTAGAAGATCATTATTTTCGTTTCTATTCCTGAGCGAGTGACTGCTTTCATGCGTGAG



TTTGAAACCGAAGCAATTTTGTAGGGATTCCAGTTACAACCTCGTCACAATGAGGTT  
GCTCCAAATCAGTTTGAGTGTGCGCCTATTTTTGAAGAATGTAACCTAGCAAATGAC  
CACAACATGTTATTGATGGATTTGTTGGAGAAAATTGCGCGTAAGCATGATTTCCGT  
GTGTTGTTGCATGAAAAACCATTTGCTGGTGTCAACGGATCTGGAAAGCACAACAAC  
TGGTCTTTGTCAACGGATACAGGAGTGAACCTGTTGCAACCAGGTAAAAATCCAAA  
ACAACTTACAGTTCTTAACTTTCTTCGTGAATACGATTAAGCAATTCACGATAACG  
ATGATTTGTTGCGTGCCTGTATTGCTTCAGCAAATAACGATCACCGTTTAGGTGCAA  
CGAAGCTCCTCCAGCAATTATTTCTACGTTTATCGGTTCTCAATTGTCGGGAATGTTG  
GATGAGTTGGAGCAAAATGTGAAAGCTGGAAAAATGACTCCAGAAGAAAAACAGA  
GTTGAAATTGAATATCGGTAAGATTCCTCAAATTATGTTGGATAATACAGATAGAAA  
TAGAACTTCTCCGTTTGCCTTTACAGGAAATAAATTCGAATTCGTGCAGTAGGTTCT  
TCTGCAAACCTGCGCTTCTGCAATGATTGTTTTGAATACCATTATGGCGAAACAATTAC  
AATTGTTCAAAGTGAGTGTAGATGCTCGTATTGAAAAAGGCGAAGCGAAGGACGAA  
GCGATTTTGAAAGAACTTCAAATCTTAAATCAAAGAATCCAAGCGGATTCGTTTCGAA  
GGAAATGGATACGGAGATGAGTGGGTAAAGGAAGCTAAAAAAGAGGTTTGAACA  
ACTTCAAAGATACTCCACGAGCATTGAAAGCTTGGGGAGATAAGAAATTTATTCAAT  
TATTTGATGAAATGGGGGTTTTGACTCCACGTGAATTAGAAGCTCGTCAGGAAATTG  
AATACGACAGTTACACCATGAAAATTCAGATTGAAGCACGTTTGATGGGTGACTTGG  
TTCAAACACATATTTTACCAGCGGTAATTGAGTACCAAATCGTTTGCTTACAAATAT  
TCAAGGAATCATGAATGCCTTGGGTGAAAAGGCTGGAAAAGATGCCGCTAAAGCTC  
AAATTGAATTGGTTACGAAGATTTCTACGCACTTGAATACCATGAAAGCAACGTGTG  
ATACCATGCTTCAAGCTCGGAAAGATGCCAATAAAATTGAGCATGCAGAAGAGAAA  
TCAATTGCATATTGTGATAAGGTAAAAGTTTATTTTGACGAAATCCGTTACCACGCA  
GATAAATTAGAGTTATTGGTAGACGATGAGTTATGGCCATTGCCAAAATTCAGAGAA  
ATGTTATTTACGCGTTAGATGTGGTTCAAATCCTGTACCTTTGTTGTTGAGATGAAAC  
AATTCGATATTCCTCCATATTTTCGTTCCGCGATTATATCGAAAGTAAAGGCATTTCCG  
TAAAAATCAAGATCCGAGAAAAAAGGATTTTTTACCCACAGTTTTGGATTTTGGTAA  
TACTCAGTTATACATTGCACGACATTTTGGATTTTGTATGGAGTTGAGAATGCCATT  
GAAATTGCTTATCGCGCTGTGGATGAAAACCAAGGGAAACGCATTTTCTTATTGAGT  
CAGATGATTCACAATCCAACCGTTAATGAAGATTTGACCAAACACGGGATTGAATTC  
ATCCAAGATACTGCTGGAAAACAATTGATTCCTTGGGATGAGTTGAATTCGAATGAT  
GTGGTGATTATTCAGCATTGGAACAACACTTGAATAGAGCAAGTATTGAAGGAT  
AGAGGAGTTTCTACTGAAAAGTATAACACAACCTTGTCCGTTTGTGGAGAAGGTTTGG  
AATCGGGCTGAAAATTAGGCACAGAAAATCATACGCTGGTTATTCACGGTAAATAT  
GACCACGAAGAACTCGGGCAACTTTTTACATACCGCTTTAAATTCGGAAGCGGTT  
ATTGTTAAGAACATGGAAGAAGCTGGTTTTTTGGCTAAATGTATTACTGGAGAAGCT  
TCAAAGGAGGAGTTTTACAACTTTTTTAAAGGAAAACATACTCCAGTTTCAATCCA  
GAGATTCACTTAAGCAAGATTGGAGTGATTAATCAAACAACCATGTTGGCAAGCGAG  
ACTCAGGAAATAGCTGAATTCTTAAAGAGGGTTACCGAAGATTTTGTCAAAAAACA  
AAGGTGGACAAAACCTTTTGCAGGATACACGTGACACGCTTTGTTATGCAACAAATGAC

AATCAAAGTGCTACGGAAGCATTAAATGAATGAATCATTGGATTTTGCGATTGTCGTT  
GGTGGATATAATAGTTCTAATACGACTCATTTAGTGGAAATTATTGGAGCAAAAATGC  
CCAACCTATTTTATCAAGGATGAATCGGAAATTTTGACTGAAAAATCAATTCAGAGT  
TTAATATTCATACCCATCAATTGGAAGCGATTGAAAATTGGATAAAAGGAAGTAAG  
ATTGGAATTACCTCAGGAGCTTCTTGTCCCGATTTCGATTATTGACAGTGTGATTTTCA  
AAATAATGGAACCTACCAACAGTGAGAAATCGATTGATGAAGTGATTGATTCATTGA  
GTTAGATGATTA AAAAGGAATACGACCAAATGACCGATGAGCAGTTGGTTATTGCAA  
TGGCAGGAGGCGATCAACGAGCTTTTGACAAGCTTTATGGGCGTTATTCATCTGCC  
TACTTTTCGTATTTTCATGCGGATGCTTTGGCGAGATCGTGAAAAATCAGAAGATTTTGT  
CCATGATTTCTTCACGAAAGTCATTCATCGTCCGGAACCTTTTCGATACCAATAGATCG  
TTCAAACTTGGATGTATTCGGTGGCCAACAATATGTGTAAAAACGAATACAAAAAG  
CAAGAAATTCGTAAAAATACTAGTAATGGATTGGATAGCAGCTATGCCGTTACAGAT  
GTCAATAAAAATACAGAAAATCAAGTGCATCATGCACTTTTCAAAGAAGCATATAAT  
TATCAAGTCACTCAATTAGAGGACAAACACCGAGAAGTATTTGAAATGAGGCACTTC  
GATGGTTTATCGATCAAAGAAATTGCCGATGCACTGGAAATTAGCGAAGGAACATC  
AAATCCAGACTATTTTATGCAACCAAATATTTAGCTCAAGGATTA AAAAGAATACCAA  
CCAGAACATATAAAAATGAATGAAGCTCATTTTAGCCGACAGTAATGAAATTATACGC  
ATTGGTTTTCGTACGCTGTTATCTACGGAGCGAAATATTCAAATAGTCGGAGAAGCT  
AGAAACAATGAAGAACTCATTGCACTCAACAAAGCTTTTGATGCAAATATTATTTG  
GTTGATTATACCTCGAAAGGATTTTCTATCGATGTAATTCCCTCAAATTCTTCAGAAAA  
AACCCGATTTAAGCGTTGTTGCAATTACACCCGAGCAATCTGCTCAAACCTTGGTAA  
ATGCACTGCGTTCTGGCGTGAAAAGCTACATCAAAAAAGATTGCGACAGTTCTGAAA  
TCATTGATTCTATTCGTGAAACTTGGAGAGGAAATAAATTCTTCTGCGGGCAAATTTT  
AGAAACTATTCGCGATGCGTCTATTGATGTAAATGATATTGATTTTCAATCATTTAGC  
TGTGAACCAATTACTTTGAGTGAGCGCGAAACAGAAATAATCACCATGATTTTCGGAA  
GGCTTGACCAATATTATGATTGCCGATTCATTTGCTTAAGTAATCACACAATTAATA  
CACATCGTAAGAATATCATGGCAAATTTGGGTGTAAAAAATACTGCCGGAATTGTGA  
TTTACGCTGTTAAAACAACTTAGTTTCTCCCAACAAATTCTTGTTTCGCAGCAGATTC  
TAATTCTTAGATGAAAAGTATTGTTACCCGACGAAAGCCTCTTTTGTACTCGCTGCTT  
TCAACAAGTTCTCTGGAAAAGAAAAAAATCAATCTGTAAAAAGACTGTTTTGTAT  
CTTTTCTAATCTCGGGCTTTGTTTTCAATTCCAATAAATCCTATGCGAGTCCTTATCC  
TATAGGCAATACGATCAGTTGGGATCAATGTAGATATGCCATTACATGGGATTGGAG  
TATATTCAGAGACTTCACTGGTACTACCATTGATGACGATAAATGGAATCGGCAAC  
ATTGAGATATAAAGCTCAGGACAATACCTGGAAGACACTGATAGCTATTCATGCTGC  
AGGCGGAACGCCAACAAATGGTTACTGCTGGTGGAAACAAGCTTTGGTGTAAACCGCTAT  
TGCCCCGGATTTTCTGCTTCCGGGACCAGTGCCTGGCCAAACACACACGATATCCA  
AGCTAATTACTCTCCAACCGGTGATGCCACTTTTCAGTGTTTTAACTTCCTTCAGAT  
ATCCTGATAACCAATGGATCAATTCAGTTACGACAACGCATTGAGTGGAAACAATCGT  
TATGATCTTATTCTGACAACCTGGATACCTTATCTTACGCAAGTACTTTGGCTATCC  
AAACAATTAGTGCTCCGCAAGGGTTGGTTGCCTCCCAAATAAATTGTAGTGCGATCA

ATCTGACCTGGAGCATGCCTTTTCAGAATTGGCAGTTGAATACTACCTGCCCCGAATTA  
CGGAGCATACTATACCCATATCTATCGCAATGGAACACTAATAGCGTCGGATCTGAA  
CGTTACAGCATATACTGATTCTCATCCATCTTTAGTTCCCGGAACAGATTATACCTAC  
ACAGCCCCGAACCTTTTTGGAAACCCTATCAAAACAATTCTGCCGGAGTTGGTATTCTA  
AGTTCGGTTTTCTCCTCAGCAACGGGTAAGCTAAAAGATAATCCGAATCAAGTACCT  
AATTTTACTGCAACGGATAACCTTTGTACAGGAAAAATCCGACTTGATTGGGGATGG  
TATGAACAAAATCCACAGGACTTTCTCATTTTCCGAGATGGGACTCCAATAGCCACG  
GTAATGGAGCTATCCGAACAACCGAAAATACGGTCACAAGAGGGCGTAACACATTC  
GTATACTATTACAGGCAAGAAATAATTGTAACCGGGTTTCATCTGACGCTGTGATGC  
CGGTCTATCTCCTGCTGATCCTGCGTTAGCAACCGATGTGACCACCAGTTATAACTCC  
GCAACACAATCAGTAACCGTAACCTGGGATGATAACGCGAACAATGAAACTGCTTAT  
CAAATCATTTCGACAAGATGACCTTGGAAGTACCATTTATTTTGATGTCAATCCGGATT  
CCACTTCTTTTGTAGATGACGGTATTTCTACCTGTCGTCAATATACGTATAAACTAAA  
AGTGAAATCAGATTGTGTACCTAGTGGGTTGATTTTCGACCTCTCAAAGCACCATACT  
CATTCTCCACCTAACATTTCAACAACCTTTGATGCAACACACAAAATAACGGGTTCT  
AAAGGTTACTTCACCAACCGGGTAGAATTATCCTGGTCTGTAAACAACGTTCAAAAC  
CTGGATTTGGTAAAAATCTATCGGAAAATCCTGGGAACAACCGATTACAGTATTGATT  
ACTGCAACAAATCCTTCTACGGGCTTATTCATCGATCAAACGTCAGATGCACGGGTT  
TATTACGAATACACGATTGTGGCAGAGAAAAATTGCAATGATTCTGTACTAACATCC  
AATCTTTCAACCGATATCGGATTCAGAAACCCGATGGGTACGTTTCAGGTCATGTG  
GAATACACCGGAGGAATTGCCGTTGCTGATGCACAAATTGTTGCTGAAGCTTCTTCG  
GGGGATGCCGGAATGCATTAGATTTTACAGGAGGTTCTGCAACTTGCGTGGATCAA  
CCACCATTAGAGGCAGGAACCGGTTTACGCATCGATTTTTGGATCAATCCATCCAAT  
ACGACAGCCGGAACGTTTTATCGAAGTCGGGAGCATATTCGATCACTCAAACCGGA  
TCGGGATACCAAGTCGGAATTACTACCAGTAACGGATCTTACTCTGTAACGATTCCA  
AATGCTTCTGTAAATTCAGGAAATTGGAACGGAATCTCCCTTCAATATGATGGAAGC  
ACATTGGCTGCATATATCAACGGGGCAATTGTCACCAGCACATCGGCAACCGGTACA  
ATCATTGATAATACGAATTCATTAATCATCGCTGGCGGCACATCATTTCAAATTTG  
ATGAATCCGCATGATGAATATTGCTGTTGATTCAGCTACAACGGTAAAAGATTATA  
GCCGTTATATGAACGGTAACGAGGTTGGTTTCAAGCTCTACTTACATTGCGATGAAG  
GCGTTGGTACTGCTACTTATGACGTTTCTAAAGTTGGTAATGTTTACAATGCCAATCA  
TGCTCAACTTGCCGGAAGTTATGCCTGGACAACCAATCGTCCTTCGAGCGCTCAATT  
AGGTTATGTAGCATAACCAATCCGCTCGGAACTATGTAATCTCAGGAATCCGTTA  
CAATGGCTTTGGAGATAATTACACCATTGTACCAAGTAAAGGAGTTCACAGTTTTGC  
TCCGAACAGCCGTTCTGTTTACATCGGAGATTTATCCAGGTATTCAATAACCAGGAT  
TTTGAAGATATCTCTTCTTTTCAGGTTACCGGAACTGTCAAATACGGAATTCATTTG  
GAGACACCCTTCTTGTGTTTTGTACCTGCTGTGAATTTATTAATTGATGGTTCACCTGTC  
ATCAAAAACGGTGTTCTGTAAAACTGATGCAAGTGGATCTTTTGATATACGCGTT  
CCAATCGGTGAACATAACCGTTGGAGTAGAAAAATTCCAACACGTCTTTACGGATTCA  
GTCACTCCTACTCTTGATTTCCAACAACCAATGACTGGTTTGTATTTCATCGACACCA

CCACTCGCTTAGTTGTGGGCCGTGTTGTAGGAGGAAAAATAGAAGCTGATAAAGCTC  
CGGGAATGGGAAGATCGAACAACAACATCGGACAAGCTAAGCTGAGATTCGCGACT  
CCGATTGTGGGAGCTCCGTGCTACAACCCTGAAATACTAACCGATATAAACACGGGT  
GAATATCGGATTAAACTGCCTCCGATGCAGTTTAAAGTAGATACCGTTTTTGTCTTA  
ATTCCGGAGTCATTCTACCATCAATCCAGGTAATCTGACGAATGGGACTACCACCA  
TTAATTTAACCAATTTTCAGTCAGCCGATTAAGAAATCGATACCCTTTACGATGCCGC  
TACCGGAGGTCTTTTAAGCATTGATTCCATTGAATACACCCGGGAATTGAATTCATC  
TACCGCACAGCTCCGATTGTTGCATTAACCGATACCCTTGGAATGCGCTTTGACGGA  
GAAGAGTCATTAGATGTGAATGGGATCGCCATTCAAATTACTCCACCGACAGGTGCG  
AACTTATGGTCTGAGTTCAACTGGCCGGTGTTCAAACAAGGTGCGAAGTACTCTTGT  
GATATTACTGCTATTGAGGAGTATACCAACTTTGATAACACTATCAAGGATACGGTT  
AAACTATCAGGAACCATATTGATCAATAACGAATTGGTAAATGGAAGTGATCCGAAC  
GGCAATATTCTTTTTCAAATGGAAAAGCACGTTACTCGTTCGTTGCCGGGGATCCCA  
ACAATAGTACAGGTGCTATTCTAGTTTTGATTACACGAAAGTGATGCAGGTTCAAG  
TTGTTCCGACAGGAGCAGCGGCTGTGCGTTGGGAGCCCAATAGTACCTCCTATCCTTT  
AAATCCGGATTATCGGGGATATATTTTGGGAACAAAATTACAGGAACAGGAATTGC  
AACTCTCGGACCTGAAAAAGTAGATTATATTCTTCGTGACCCCGCAGGTTCTGAATCT  
TCTGCAACCTGGACAAGTGGCCATGCAACTACCAATACCAGTTCATTTTCCTTATCTG  
AAGCTTCCAGTGAAGCAACCAGTTTAAAGTGTCAACGTTGGATTGAACAGTCGGTAG  
GAATCGGTGTTCAAGTTCCTATAAATATTACAGTTGAAGCCGGATTAGGTATCTCTGT  
AGATGCTTCCAGTAGTCAAGGTGGATTCTTTGCCGAAACCATTACCTCTTCGAACTCG  
GTTTCTACCCGAGACGATGCAGACCATGTTGGAGCTGATGCAGATATCTTCATTGGG  
CGATCCAGAACTGGCTGGTGGGACCGACTAATAATATTGAGTTAGTTGAAACAGCA  
GCTTGTGCAACCGGGGTCATTTGTTTTGAACTCCTGTGGCAGGCTACAGCTTATCCA  
AAAATTGGGGTATGCGATTCAGCCTTCAACCGTAAAAACCCGTTTTTTCTTACACGC  
AGTCTGAAATTGAAAACATCGTGATTCCAACATTGGAAGACATGCGAACAGTCAAAC  
TGAACGGACCAAACATAACGAGTAACCTGCCTGCATCGGATCCAGGATTCGGGGCAA  
ATAATGACGATCCTATTTTCGGTGCATCTGCAACTACAAACTCCATTTATATTCGA  
GAGCGCAGATGTATCCGGACCTTCTATACATTCACCGGAGCTGTATCCGATAACGA  
TTCCGTACGGATCATTAAATCAACAGATTGCTCTGTGGAAACAAGCTTTGGCACGAAA  
TGAACGCGAAAAATGGGAAGCTATCAACAATACGGTTGCCAATTCATCATTGACAA  
CTTTACATTAGGTTCTGCTATTGTAACGAACAGTTACGAAGTAGCAACAGAATCTGA  
ATATACGGAAGAATGGGAATTGGCTATTTCAAATGCAATCAGCACTTTGATTGGAGC  
GGAAGCAGGAGGAGTTGGTGCTTCTGTGGAACGATCACTGGCATTAACTGAAGTGA  
GAGGAGGTTCTAACAGCGTACACAAAGCAACTCAACCGCATTTGAATACACCTTAA  
CAGATGGAGATGACGGAGATAATTTTCAGTATTGATGTCTATAAATCTTCTACCGGTA  
ATATTTTCGTAACCCGTGGTGGGAAGATCCATGTGTCCGTATGAAGGTGCTGTACAAC  
CGCATTATTTTGATCCGGCTAATCCAAATGCCCGATTACTTCTCATAGCTATGTCGA  
TAATCCAACGGCAACCATTTCAGTTAGCGACGACTCAGCGGGAAATACCGGATATTTT  
CATCACACCTTCTACACAATAACAACATTCCTTCCAGTCAATCGGCAGTTTACCAATTG

ATTTAACGAATCAAAGTACGTTAACAGTTAACAACGATATCGACATGCGTGTGCGT  
GTAGCAAGTCAGAGCAACCCTCATGGTGCTATTGTGAAAATCGACGGATTGGATCCG  
AATACGTATTACACCATTCTGCCGGGGCAGCTGTTGTGAAAACATTGACTGTAGAA  
AGAGGTCCGGTATATACAGATTACGATAGTTAATGATCATCTTCTCTTCTGCTTGT  
CGGAGGATATTGCTGATACATCTTATATATCCGTTCACTTTATTCTACTTGTACTGA  
GTTAGCGTTGATTAATCCGAACAACAACACTGGATCATCAATAACAACAATCAAACTT  
TTTAAACGTAGGTATTTCCGGATATAACTACAATTACGGGGCAGCAACAATTATTGA  
TACAGTTCCAAATCCGGATGATACCTTAAACTTAGGATTGAATAAGATCGGTTTTGA  
AATGAAACCTTCCAATTCCAGTATTTGGCTGCCGATTGAGCAGTTCTTAAAGTATCCG  
GGACCAAACGACTCCATTATTCCAGGTAATTCGGTTTCTACGATTTACCCTTGGGATG  
TTTCTCAAATTCGGATGGAACTACGAATTACGTGCTCAATCCTATTGCTTAAATTT  
TGATGGTTCTTACTCTACGGTCAGTTCTCCGGTTTTTGCCGGAATCATGGATCGTGTT  
TACCCACATCCGTTCCGTACACCAAGTCCTGGAGATGGGATTTTGGATCCGAATGAC  
GACATTGCTATTCAGTTCAACGAACCACTAGAGTTGGGCTCCATCAACTGGGATAAT  
TTCCAGGTTCTGGTGTATTAATGGAAGTACATTACGCCATTCCGAATTCATCAATT  
TTGACGGAACAGATGATTACGTGGAAGTTCCCGGTGGAGTTGGTTTACAAACCAAAA  
GTTTACCCTTGAATTTCTGGGCTCGTCAAACGGGAACAGGAACTGAACAAGTAGTTG  
TTTCTCAGGGAATCGATCCGAATGAATCTGTCAGCATCGGTTTTGATGCTTCTGGAAA  
AATGAAATTCTTAATGAATGGCGTTTCGAACTTTCCAATAATACCCTTTCGGGATTG  
AACCAATGGAATCATTATGCGGCTGTTTACAACACTATGAACTAAATGAAGTTTATTTGT  
ATCAAACGCCATCTTACTCAATAACGGAAATGCTAGTTTCTCAGTGAACTTTCATG  
GAACTGACAACTGTATTTTGGAAAACAGATGCCTCAAACAGCAATCACTTCCAGG  
GACATTTGCATGAAGCAAGAATTTGGAATAAAGCGCGTACATCCGGTGAATTGACTC  
AAAATATGAACTTGGTATTAACGGAAGTTCAGCAGGATTGGTTCACAACACTGGCAA  
TGGATGAAGCTCAGGGAATTATTGCGAAAGATAAAATCAGAGAACGTAATGCAGTG  
CTATATGGCGCAAACACTGGCAAGTAGATCCAAACGGATTCTCCGGTGAGTTAACGGT  
ACAACAAGTTATGTTGCGGTGAATGCAACAACGATTCCGGTTACAAGACAAATGGAT  
GCAACCCTTGAATTCTGGTTTAACTCTTCTCAAGCAAGCGCTTCTACCCTATTCTCTC  
CGGAAAAGGAGATGGCTTGAGTGGAGACTCATTGACCGGTTGGGAAGTTAACAAAG  
ACCTGGCAGGAAAAATCCACGTACTACACCATGGTTTGGACTTCTTAGCAACTGATT  
CCAATTATTTGATGGAAGCTGGCATCACTTTGCTTTGGTTTTGAACAAAAATGCAA  
CCTGACCGCATTTGTTGATGGAATGCAACAAAATTCGGTTCAATCGATTGGTTTCGGA  
GCACTGGCAGGTTCTTATTATACGTTAGGAGCAAGAGGTTATATGCAAAGTGGCGGA  
ACGTATGTTCAAGATAATCACTTCCAGGGCCGAATCGATGAATTCCGTTTGTGGAAT  
GCATCCCGTAAACAGAACAAGTGAAACGAGATTTAAGTCACCGAATGCAGGGAGA  
CGAATATGCCTTGTTAGCACATATTCGGTTTGAAGCCTATACTTCAAGTAATGGGTGTT  
CCAACCTTAAACAGCTTCTGTTTCCAATACGGTAACTACCTACCCGACGGCTACGGCTT  
CTGCTTTCGGTGGAGCAACCACTTCCAACCAAACTCCAGTAATAAACTACCAAGAC  
CGGTAGAGAACGTGAACTTCACTGGTCAATGAACAATGATAAGATCATCATTACTC  
CAACTACATCGCAAGAGTTATTGGAACATCAGACGATCGATATCACGGTGAAAAATG

TATACGATTTGCAGGCCAACCAAATGCAATCACCGAAAACATGGATTGCATACCTTA  
ACAAAAATCAGGTTTACTGGGCAGACGATGTGTTGGATTTTCAAATCGAAGTGGATT  
CCAATCTTCAATTCACAAGTACTATTTTAAATACCGGTGGGGCGATGAAAGAATTCCG  
AATTGTCTGATCTGCCAGGTTGGTTGACCGCTGATATTACTTCCGGAACCATTGCTCC  
AAACAGTTCCATGATCGTGCACCTCACGCTTCAGGACGGACTGAATGTGGGACAATA  
TTACGCTGATATTGCATTGACTACTGATTTCAATTACAACGAAATATTACGAGTTGGT  
TTAAATGTGAAAGGAAATGCTCCGGATTGGACAGTGGATCCTTCAGATTTCCAATAC  
TCGATGTCTGTGATCGGTGAAATTAATTAGATGGTGTCTGAATGGCAACACAGAA  
ACCCTGATTGCGGGATTCATGCATGATTCCATTGTAGCATTAGGAAACCTGGAATAT  
GTAGCAAGTTATGATCGCTACGAAGTATTCCTGAATCTGTATAGCAACCAACAAATC  
GGAGATTCCGTTTCGTTCAAAATTTACGATGCCAATACCGGAAACCTGTATCCGATC  
GTTACTCCTTCAATCTTTTTCAATGAAGGTGATGTATTAGGAACAATCTCAACACCGG  
TAACCTTTGAAGCTTCATTGGTATTGGAAAAAGAAATTCCATTACTTGCAGGTTGGA  
CTTGGATTTCTTACCTCTTAACTCAAACAAGCAAGGAAGTAGTAATGAATTGTTTGA  
AGATTTGATGTTCAACGAAGGAGATATTTCTATGAGCCAATCGTCTTACGATCAATTT  
GACCCTACTACACAGTGGATTGGTAACTTAACACAAAACGGAGGATACCGAAATGT  
GGCTTCTTATCGTGTAAAAAAACAACCTGGCTGACACGCTAATTTTGTAGGGTACAG  
AGTTCATCCTGATTCGTCTTATGCCGCAATAAATGTAGTACCGGGATGGAACCTGGAT  
CGGATTCATGTCAACCAAAAATCTTTCGTTACAAGAAGCTCTGGGGAATTATACGCC  
ACAAGATGGAGATCTGATCAAATCACAATATGAATTCGCGATCTACGATGGGTTGAG  
TGGAACCTGGAACGGTACTTTGAATACCATGCGACCAGGTTTAGGCTACGCCCTAAA  
AACAACTGCAGCAAGTTCATTCCATTATCCAATAACGGCTTACTTAAGATCGGGAGA  
AGTAGATGGACCAACTCCATTCTATGAATTAATGTTGGGAAATACCAAAAAACAAT  
GAACATGATTGCAACTACCAACATGTGTATCGAGCAGTTAACTGCTCCGGATATGGT  
ACTCGGTGCGTTTGATCAAACCGGTGAAATGAGAGGATATGCATTCCCGCAACTCGC  
ACTAAACGGTGAAGATTACATCTTCTTTATGACTTTGTACGGAAACGAAGAAAACGA  
GTCTTTGTCTTTGAAATTTTTCAACAACACTGACGGTTCTAACTAGCATCTGAAACC  
AGTATCCAACCTGATGGAGAATGCACTAAGCGGAAGTTTAAATGAACCATACCAAGTT  
GTATTGGCTGACGATAAGGTTTGTAGTGGATTTGATTCTTCTCTGGGCTTAACACCTA  
CTTTGAAAATCAATTCACGATCAGTCCGAATCCGTTTATGTCATTCTTTGCAGTTGA  
ATTACCCGAAGAATTTCCGGGAAAGTGGAACCTCATCGATTTAGTAGGAAGAAGTGT  
TTACAGCGAACAGTTGACCGCAGTTTCTCACTACGAGTGGCAAAGCAAACCAATAC  
AGCAATCGTAAACGGAACCTACTATGTAAGATTTACTTCCACAGACGGAGTAATCTA  
CCAGAAAAAAGGAATTAATATTCATCCAATAAATAAATGCCAAAAATTGCTCAGA  
AAGCCATTGACATGCCTGCTTACCAATTCGTAAATTTGGTTCCTTATGCTGAAAAAGC  
TAAAAAAGCAGGAAAAACTGTTTACCACTTAAACATTGGTCAGCCGGATATTGAGAC  
TCCGAAAGTAGCTTTAGATGCTATTCGCAACTTTGATCATAAGGTTATTGAATACAGT  
CACTCAGCGGGTTTTGAATCTTACAGAACAAAATTAGCTGAAACATATCGTTTAGGA  
GGTCTTCCAGTAAATACAGAAGATATCATTATCACAACCTGGTGGATCTGAAGCATTG  
ATTTTGGATTCATGACCACTTGTAAATCCAGGTGACGAAGTGATTATTCCTGAGCCCT

TTTACGCAAACACTACAATGGATTTGCAGTAACCGCTGGACTAACCGTTATTCCTGTTAC  
ATCAACTATTGAATCAGGATTTGCTTTGCCCCAGTATCTGAAATTGAAGCAAAAAT  
CACTTCAAAAACAAAAGCAATCGTTATTTGTAATCCTGGAAATCCAACCGGATATTT  
ATACAGTAAAGAAGAATTAGAGCAATTACGTGATATCGTTAAGAAACATGATTTATT  
CTTGTTTGCTGATGAAGTTTACCGCGAGTTTTGCTACGATGGAGCTCAACCTTCTCT  
GTTTTGAACTTAGAGGGCATTGAGAATAACGTTATTATGATTGATTCTGTTTCCAAGC  
GTTATTCGATGTGTGGAGCACGAATCGGAGCATTGGTTTCTAAAAACCAAGAAGTAA  
TGGCTGCAGCCTTGAAATTTGGACAAGCGAGACTTCTCTCCAACAGTAGATCAGA  
TTGCTTCTGAAGCTGCTTTAAACACTCCGCAATCTTATTTTGATGACGTAGTTGCTGA  
ATATGTTCAACGTCGAAACATTATGGTTGATGGATTGAATAACATTCCAGGGGTATT  
TTGTCCAAAACCAAGCGGTGCTTTTTATTGCGTTGCAAAAATCCCAGGTGGATAATGCA  
GAAAAATTCTGTCAGTGGTTATTAGAAGATTTCGAATTTGAAGGTCAGACGGTAATG  
ATGGCTCCAGCAAATGGCTTTTACTCCACACCTGGTGCAGGAATGCAAGAAGCACGT  
ATTGCTTACGTATTAATCAAGATTCATTGAAAAAGCAGTGATTTGTCTAGAGAAG  
GCATTGGAAGTTTATCCTGGAACAATACGCTAAATGAAAAAAGTATATATCAACGAA  
TATGGTCCAAGAGTTTCAGCTGCGGTTTACGGTTTCTGGAGATGGACAGAAGAGGAT  
TTGGCGGATTCAAAGAAATTCAAAGAAATTGTTTTGTTTACGCGGGAATTGGGAATC  
GACACTTATGATTTAAGTTCGAGTGGAGGACAATTGGAAACTCAATTCGGTAAATTA  
ATTGAATCAGGAGCGATTAACCAATCAGAATTGATTCTTCCACAAAAGTTGGACAA  
CGAGAATACTCTGGAGCTTATGGTAGTGGAAATTTACTATGATTTAAGCCCGCAACAC  
ATTACAAAAGTGTAGAACAATCCTTGAGTCGCTTGAAACGAGATAAAAATTGATATT  
CTCATCTTGGAGAATTTTGATTTTCTTCCAATTTTGAACAACTGCTTCGGCATTATT  
GAAATTGCAGCGTAGTGGAAAAATCTCATACATAGGTGTTTCGAACTTCAATGTGTT  
TCAACAACGTCTGCTTCTGCATCTTTTACAACCCATTATAACCAATCATTGGAG  
TTAAATCTCCTTCAATCTGAAGCCCTGCACGATGGAAGATTTGATTTTATTTCGAGAGC  
AACACAGTCGTGCCCTTAGCCTTTTCTCCTTTGGCTGATGGTAGGATCTTATTGGGAGA  
AGATGCTCAGGCAGTCAAATTGCGTTTGGCATTGATTGAAATAGGAAAGAAATACGA  
AGCGAATGTGGAACAGGTAGCCGTTGCTTGGTTGAATAAATTAGGCGCCTTGCCAAT  
TATTGGTAGTAAGGAAAAGCGTTCGATTCAAAATGCGGCAACGGCGCATAACATTTGA  
ATTGACTCAGGAAGACTGGTACTTTCTTTACAATGCCACAAAGTAAATGGAAAGTTT  
TAGAACCGAGTATGAGCTTCAGGTGGAAGCGAAAAAACTACGGGTGGAAAAGGATA  
TTCTTGAATTGGGAGATAAAAATTGCCGCATTCAAGGATGGAAAAATCCCAGATGATA  
AATTTGCTCACTGAGATTGGCTCGTGGTGTTTACGGACAACGACAGTTAGGAGTGC  
AAATGATTTCGGATCAAACCTTCTTATGGGAAATTGAGTTCCAATCAATTGCGCAGAA  
TCGCACAGGTTAGCGATGAATACAGTACGGGAAGATTGCATATTACAACCCGACAA  
GACATCCAGATTCATCATGTCTCATTGGATAGAATCCTCAATTGTGGTCCGATTTGG  
AAAAGACGATGTGACTTTGCGTGAAGCTTGCAGGAAATACAGTTCGAAATGTCACTG  
CAAGCGACAATGCGGGAATCAATCCGAATGAATTATTTGACGTGACTCCTTATGCCG  
AACAGGTATTTCAATACTTTTTGCGGAAACCTTTCGGACAGGAATTGGGGCGCAAGA  
TCAAAATCGCCTTTAGTTCCGATGATCAGGATGATGCATTTACTTTCATTCATGATTT

TGGTTTTATTCTCGAATCAAACCTCAAGGTAAATTGCAAGTAAAAGGTTTCAAAGTT  
CTGATAGGTGGTGGATTAGGGGCTCAACCTTTCCTAGCTCATGTTGCGTATGAATTC  
TTTCCGAATCAGAAATCATTCCGTTTATTGAAGCTTCCATTTCGATTTTCGACCGCTA  
TGGCGAACGGAACAGTCGTAACAAGGCCCGAATGAAATACCTGATTTCTAAAATCG  
GTTTGGAACTTTTTAGAAATTAGTAGGTAAAGAAAAAGAAGCCGTTCAATTCGATT  
TGAATAGAGATCAGGTAAACCGTAACTGAATTTGAATACGAAGAACAGACAGCT  
GTTGAACGAGACGATTTGTATACATCTGATTTGGTTTACAACCAATGGATTCGAACG  
AATGTATTTCTACAAAACAACCAGGTTATCTGGCTGTTTTTGTGAAAGTTCCCTTGG  
GCGATTTTATACCGATCAGGCGCGTTCTTTAGCCTATTTGTTGGATAGTTTGAATCT  
TCCTGAATTGCGTTTTACGATTAATCAGAATATCCAGATAAGAGGAGTGAAACCCGA  
ACAGTTATCACCCATTTATTTGCAATTGGAACAGTTGAATCTGATCGGATCAGGATAT  
GGTGGTTTGACAGATATCACAGCTTGTCTTGGAACAGATACCTGTAATCTGGGAATT  
TCAAACAGTACGAATGTCGCTTTGGAACCTGGAATCATTTATTCGTACCAATTATCCAA  
AACTCATTGAAGAAACGGGCATCAGAATCAAGATAAGCGGATGTATGAATTCATGT  
GGTCAGCATGGTTTGGCTCACATCGGTTTCCACGGCAGTTCCATTA AAAACAAAGGAA  
GGAACACTTCCAGCTTTACAAGTATTATTGGGAGGAGGACAAACGGGAGCTGGAAC  
CGGAAGAATTGCTGAGAAAGTGATCAAAGTACCCAGCAAGCGCATCTTGAAAAGTTG  
TTCAGTCAATTTTAGATGATTACCTCCAATTCATGAGAATGACGAAGCCTTCAATGC  
CTATTACGACAAACAGGGAAATACCTATTTCTATAACCTGCTGAAACCCTTAACGGA  
TTTGAATCAGGTGGAATTGGAAGAATACTTGGATTGGGGACAAAATGAACGCTTCGC  
AACGGCAATCGGAGTAGGAGAATGTGCCGGAGTAATCATTGACCTGGTTGGCACCTT  
GTTTTTTGATGCAGAAGAAAATTGTTTTCTGCTCAGGAAGCATGGATAGAGAATCG  
TTACGCTGATTCAATCTATTACGGGTATGCAGCAGCGGTCCATTCGGCAAAGCAA  
GTTGATTGAAAAGGAATCAGATGTAATTCGCAACATGGAATCCTGACAGATTTCGA  
TACGCATTTGGGAGCAGATTTTCGTTATTCCGACTCGAATTTGTTTAGCGATTTTGTA  
TTGAGAATTAACAAGGAAAAAGCTTCGAAAGTCTTTGCGAAGGCCTATTTGAATGAA  
ATAGAAGAATTGATAACGAAATTGAAAGTGAAAAATGAGTACTAGATGAGAGAAGT  
AGCAGAGCAAACGAATTGTTTCCAGTATTCTTGAAAACCAATGAACTGCAAGTTTT  
ACTGGTTGGCGGTGGGGCGGTGGCTTTGGAAAACTCAAGGCGTTGTTGACCAACTC  
ACCGCATAACCAGGTATCTGTTATAGCACTGGATTTTAGCGAATCGTTTATTGATTTT  
GCGGAAAGACACGAGCAGGTCTATCTAGAAAACAGGGCCTTTGAGGAAGACGATGT  
GAAAGGGAAGCAATTGGTAATAACTGCCCTGAATGATTTAGAATTATCTGCTTCCTT  
GAAAACAATCAGTAATGAGGCCGGCATTTTGTACAACGCAGCAGACAAACCGGAAT  
TGTGTGACTTTTATTTGGGATCAGTCGTTAAAAAGGGAATGTGAAAATCGGCATTT  
CCACTAATGGAAAATCACCCACTTTGGCAAAAAGACTCAAGGAATTGTTGACGAAA  
ATTTGCCTGAAGA ACTGGATGATTCTGCGTTGTATCTGAATCAGTTTCGGGAGTATCT  
CAAAGGGGATTTTACAGATAAGATAAAGAACTCAACAAGGCAACGGCAAGTTTGT  
TGGTGAATCCGAAAAGACCGTGGTATTTCTTTTCTCCATGGAAATTGTTGGCCTATTT  
CTGTGGAATAGTGGGAGTTTTACTCACCGGACATTTGCTCTTACCTTAATTCCACTG  
GAAAGCATTGGAATTCAGCTTCTGGAATGGTTGATTCATTGACCATTGATTTTGCTT



ACTTCATTTTGGCCGATTTGTAGCTCAAATGATCGACGGAGCATTAGGAATGGCGT  
ACGGAGTTAGTGCAACTACTTTTTTATTGTCGTACGGGATTACGCCGGCAGTTTCAAG  
TATGGCTGTACATGCTTCCGAAATATTTACAAGCGGAGTTTCCGGAATCATGCATTTG  
CGTTCCGAAATGTGAATAACCGTTTGTCAAATCGATCCTGATTCTGGGGTTTTAG  
GTGCGATTGTAGGAGCGTATGTATTGTCTGAATTTGAATCATAACAATGAGATCATCA  
AACCGATCGTAAGTGCTTACACCTTGTTTTTGGGAGGATTGATCATATAACAAGGTACT  
TCGCAAGAAACAAGCACGAAAGAAAGTGACCAAAGTAGGTTGGCTGGGACTTTTTAG  
GAGGTTTTTTAGATTCCATAGGCGGTGGAGGCTGGGGCCCCGTCGTTTCTTCAACCT  
GATCGCTCGTGAAAGCACCCGAGAATGATTGTCGGATCGGTGAATCTGGCTGAGTT  
TTTCGTGTCTCTGGCTAGTTCCTTACTTTTTTACAGTCATCGGTACATCCAATGTGT  
GGCAACCGATTGCCGGATTGGTTTTAGGAGGAGTTTGTGCAGCGCCTATTGCTGCTT  
ATCTGGCGTCCAAGTTGAATATTAAGCAATGATGTTGTTTGTGGAATTGTAGTAGT  
AATAGTCAGTTTACGCAATTTTCTGACGCTAATATTTTAAATGATTGAAACAGATATC  
ATTATCATTGGAGCGGGTCTGTAGGGCTTTTTACTGTATTTGAAGCTGGATTATTAA  
AGCTGCGTTGTCATTTAATTGATTCTTTGCCACAGCCAGGTGGACAATGTTCTGAAAT  
CTATCCAAAAAACCGATTTATGATATTCGGGGCTTTGCTTCTGTTTTGGCTGGTGAT  
TTGGTGAATAACCTGATGGAGCAGGGAGCGCCTTTCAAACCTGGTTTCACATTGGGA  
GAAGCAGCAAGTACTATTGAAAAGCAAGCTGACGAATCGTTTATTGTTTCTACTGTC  
AAAGGAACGCAACACAAAGCGCCAATCGTTATGATTGCTGGTGGATTGGGTGTTTTT  
GAACCTAGAAAACCGCCGATTGAAAGCATCGGGTCTTTTGAAGAAAAGGAGTTGA  
TTACATCATTAAAGATCCGGAAGTTTTTCAAGGGAAAGAAATGTGTGATTGCTGGTGG  
TGGTGATTCCGCTTTGGATTGGTCTATTTATTTAGCTGAAAACAACATTGCTTCGGAA  
GTCATTTGGTACATCGAAGCGCCTCGTTCCGCGGACATTTGGATTCAGTGCAGAAA  
GTGATTGATATGGCTGATTCTGGGAAAATTTCTTAATCACAGAAGCTGAAGTGACA  
GATTTAAAAGGTGGTACAAGTTTGAAGAAGTTGTAATTAGTCATTCAAAAAATGGA  
GAGATTGTTACAAAGGCAGATCATTTCAATTCCTTTGTTTGGATTGAAACCATCTTTGG  
GGCCAATCGCTGATTGGGGATTGGAGATAGAGAAAAGTGCTGTCAAGGTGAATACA  
CTGGATTATTCAACAAATATTCCCGGAATTTATGCCATTGGTGATGTCAATACGTATG  
AGAACAAATTGAAGTTGATTCTGTGTGGTTTTTATGAGGGAACTTTGGCTGTTCAATC  
TGCCTTTGCACGCATCCATCCAGATAAAAAGAATATTCTGAAATACACTACCGTAAA  
TGGAGTTAATGGCTTCTAGATGAAAACAAAATTCTCCTCTCTCCTTTTCTTCCA  
TTTTTTCAATTTGCACAAGATTCTCAAGGATCATGCTCTCCATTA AAAAGCATAATC  
ATTCTCACTTAAAAAGCAATACATTCACTGTTACACAAAATTGCTCAAACGGAGCTTT  
ATGATGTTCACTATTACTTTTTGAACCTAAATATGACAAATCTGTGACCACTCTTTC  
TGGATCGGCTGAAATACATGCAAAAAGCGCGGTAAATTTGGACACAGCTTTGGTAGA  
ACTTTACAATTCATTCATTTTCACTATATCGAAGTTGATGGTACTCCTGTTTCTTATA  
ACAGACAAAATAGTGCATTGAAAATTCCAATCAATAAATTAATTGGTCAAAACTTTG  
TAATCCGTGTGAATTACAGTGGAACACCTCCAATTCAGCGACAAAATCCAAGGTG  
GAGGTGGAATGACCAATGCAAGTTCACCCTCTTGGGGAAATCAAGTAACTTGGTCTT  
TGTCTGAACCATTTTCAAGCGTATGAATGGTTCCTGTAAAACAATCCTTAAAGGACA

AGGCTGATAGTTGTTCTGTCTGGGTCACGGTTCCTTCCAATTGTAAAGCAGGTTCCAA  
CGGTCTTCTTCAACAAGTGGTGGATTTAGGAAATGGAACACATCGCTTTGAGTGGAA  
ACACAAACATCCAATTGATTATTATTTAATTTTCAGTGGCAGTTGCCAAGTATGTGGA  
ATACAACGTTACAGCGAATCCAGCAGGTTTCAGGTCCTGTATTGATTCAAACTTCAT  
CTACGATAATCCAGGAACTTTACCGAATTTCCAAAACGATATTGACGAAAACAGTGGGA  
TTTCATAGAATTGTATGCCGATTTATATGGTCCTTATCCATTTCGCTGACGAAAAATAC  
GGCATTGTATGGCTCCAATTTTCAGGTGGGATGGAACATCAAACAATGACCACACAA  
GGTTTTTTCAATCCAACACTTACTGCACATGAATTGGCTCACCAATGGTTTGGAGATC  
ATGTAACATGCTCTTCATGGGCAGATATTTGGGTAAACGAAGGGTTTGTCTTATTTC  
CGAATACATCATGTTAGAAAATTTATATCCTGGTGACGAACTTCAAGACATGCTCGA  
TAAGCATTCCAATATTATGTTCGCAAACAGGAGGTTCCGTTTGGGTACAAGATTCATT  
AAACGATGGAAGTATTTTCTCTGAAAGATTGGTTTACAACAAAGGCGCTGCAATTGT  
GCATACTTTGCGTTTTTTAGTCGGTAATGACCAAGTATTTTTCGATGCTTTAAAAAC  
TTTCAAGTCATCTATGCTGATTCAGTTGCTTCAGCAATCCAATTAATTGATGTAGTCG  
AAAATGAAAGCGGCTTAGATTTACCAATTATACCGAAGAATGGTATTTTGGCCAAG  
GATACCCAACCTACTCTGTTTCGTTGGAATACCGTTGGAAACGATTTACTACTAGAAA  
TCAATCAAACAACCTCCAGACCAGCAATTACCCCTTTGTTTACAAATGATTTGGAATT  
GTTATTTGATCGAACAACCTGCTGCTGACACAACCTATTCGCTTTCAAATTACTGGAAC  
CAAATCAGTTTATTATTCCAATGCAGCTGATTTTGTCAACATTACGAAAATTGATC  
CGAATAACTGGATCTGCAATAAGTCAAATGGAATTGTAAAAGACGCAAATTTTACTG  
CTGGCATAAAAAGAAAATCCAAACAGACCAAGCATTTCGATTTATCCAAATCCAACGA  
ATGGACCAATTACTATTGAAATGGCAAATCATTGGGGCGATTTTCACTTGGCGCTTAT  
GGATCACAAGGGAGGTTTAATTCTTTCCAAGGATTTCACTAGTTGGACCACACTTGA  
TTTGAAAGAATACGCTCAAGGAACATACATTTTACAAGTAACAGATATTAATCTGG  
AGAAGTGTTTTCCAATTGATTAAGAGATAAATGGAAATTCAAGAATTA AAAACGAT  
TGAAGAAATGTTACCTCATCTTAGCGTTCTTCAGGAATTGTATCCAAAGCTGGATTTA  
GAAAGCTATGAGCGCATGTTACAAGCTATGATTCCCAATAATTACGGCCAAATCGCT  
TTGTTTTCAGAAGGTAAATGCATTGCAATTAGCGGATATTGGTTGGGGACAAAATTA  
TGGTGTGGATCTTATTTAGAATTGGACAATGTCATTGTATGTGAAGCAGCAAGAGGA  
ACTGGAGCTGGGAAATTGATTCAACAGTATTTGGAAGAAAAAGCAGTCCAGTTAAAT  
TGCACCTTAATGGCCTTGGATGCTTATACGAATAACTTCAAAGCACATCGCTTTTATT  
ACAATCAAGGCTATGCTCCAAAAGGATTCATTTTCATCAAAAATATTGAATGAAAAAG  
GGTTGACTTAAATGGATTTATTTCAGCTCTTCAGATCAAACAACGAACTTACTTCCGCA  
TGACGGAACGGTGAATTACTATGGCGTTGTTTTTACGAAAGCACAAGCCGATCTTTT  
CCTCGATTATCTGCTGGAACACATTGAATGGAAAAACGACGAAGCAATCATATTTGG  
GAAAAAGATTATCACGAAACGAAAGGTAGCTTGGTATGGAGATCGGGCATTGAAAT  
ATACTTACTCCAATACCACCAACAAGCTTTGCAATGGACCAAAGA ACTATTGGAAC  
TCAAAAACAATCGTAGAAGCTAAAACGGGTGAAACGTTTAAATTCCTGCTTGCTTAAAT  
TGTATCACGACGGCAGCGAAGGAATGGCTTGGCATAGCGACGCAGAAAAAGACTTG  
AAGAAAAATGGAGCAATTGGTTCATTAAGCTTTGGAAGCGAACGAAAATTTGCTTTC

AAACACAAACAGAGTACCCAAACTGTTTCAGTTTTGCTTGAACATGGAAGTTTGCTC  
GTAATGAAAGGAGAAACGCAAACGCATTGGCTCCACCGACTTCCACCAACCAAGTT  
ATCCAAAAACCACGTGTTAATTTAACTTTTCGAACGATTGAGAAATGAATGATTTT  
AGTAACAGGTGCAACAGGTAATTTGGGAAAGGCAACAGTTGAATTTCTAGCAAAAA  
AGATTCCTGCAAAGGAAATAGCAGTATTGGTTCGTGATGCAAACAAAGCAAGCGATT  
TGAAAGCATTGGGCGTGGATGTAAGAGTTGGTGATTACCATGATAAGGATTCATTGG  
TAAAAGCATTTC AAGGAGTTGAAAAAGTGCTTTTAATCTCTTCCAATGATTTTAATGA  
TCGCTTAGGTCAACAAAAAGAGCTGTTAATGCAGCGAAAGAAGCTGGAGTGAAAC  
ACATTCTTTACACAGGAGTTTCCATGCAAACATCGAACAATCGGCTTTAAAACCAT  
TCATGGGAGATCATTTCGATACAGAAAAACACATTTTAGAATCTGGATTAACGTATA  
CATTCTTGCGTGATAATTTATATGCAGATGTCCTTCCAATGTTTGTGGAGAGCATGT  
ACTTGAAACGGGGATTAACTTTCCAGCAGGAAACGGACGCGTTCCTTACACTTTAAG  
AACTGAAATGGCAGAAGCTTTTGC GAATGTATTGAGTACAGCAGGACATGAAAACA  
AAACGTATGAAATTTCGAATGTAGAAAGCTATTCTTACCAAGATGTTGCTGATGCGC  
TGTCTGCTCATTCTGGAAAAACAGTGAATTATACAGATGTTTCTGTTGCCGATTTTTC  
AAAAACGTTGAGCGAAGTTGGTCTTCCTGAAGCGATGATTGGTTTTTCAGTTGGCTTT  
GCAACAGCAACAAAAGATGGTGATTTTCGATATTCGAATACTCATTGGAGCAACTT  
TTGGGAAGAAAACCAAGCTCTTTGAATCAATTCATCGGAAAGATTTTCCAATAAATG  
AGTGTTCTAGTTAATAAAAACTCTAAAGTAATTGTACAAGGATTCACAGGAAGTGAA  
GGTACTTTCCATGCAGGTCAAATGATTGAATATGGAACAAACGTTGTTGGTGGGGTG  
ACTCCAGGAAAAGGAGGTTCTTCTCACTTAGATCGTCCTGTTTTCAATACAGTTGCTG  
ATGCAGTAGCTAAAACCTGGTGCAGATGTTTCTATTATTTTCGTTCCGCCAGCTTTCGC  
AGCAGATGCTATTATGGAAGCTGCAAATGCTGGAATTAAGTAATCGTTTGTATTAC  
TGAAGGTATTCCTGTAAATGACATGGTGAAAGCGAAAGAATACTTAAAAGGTTCTGG  
AGCTCGTTTGATCGGTCCAAACTGTCCAGGTGTTATTACTGCAGGTGAAGCAAAAGT  
TGGTATTATGCCAGGTTTTGTATTCAAAAAAGGAAAAATTGGAATCGTTTCTAAATC  
AGGAACGTTAACATATGAGGCAGCAGATCAAGTTGCTAAAGCTGGATTAGGAATTA  
CAACAGCAATCGGAATTGGTGGTGACCCAATCATTGGA ACTACTACGAAAGAAGCT  
GTAGAATTGTTAATGAATGACCCAGAAACAGAAGGTATCGTAATGATCGGTGAAATT  
GGTGGTAGCTTAGAAGCAATCGCTGCTCGTTGGATCAAAGAACACGGTACAAAACC  
AGTAGTTGGATTTATCGCAGGTGAAACTGCACCAAAGGCCGCACAATGGGTCACGC  
AGGTGCAATCGTTGGTGGTGATGATGATACTGCTGAAGCTAAAAACGCATCATGCG  
CGAGTGTGGAATTCACGTAGTTGATTCTCCAGCTCAAATCGGTGCAAAAATGGCAGA  
AATTTTAGGAGTTACAGCGTAA
